# Supplementary material for: Herbivorous fish microbiome adaptations to sulfated dietary polysaccharides
Source: Research Square preprint supplement (doi:10.21203/rs.3.rs-1754689/v1), 2022-06-21
Supplement: Supplementary file 1 [file 4fbf4d2bfcdc85c92172615b.xlsx]

## Sheet: fish max25 gene distance stats
Additional File 15.
Co-localized CAZy and SulfAltlas classified genes and separation distances in fish gut and terrestrial ruminant microbiomes.
This file includes separation distances for all co-localized CAZy and SulfAtlas classified gene pairs occurring on the same contig,
with separate tabs for with frequencies for all pairs occurring within an intervening distance of 25 genes or less,
suitable as input for creating network diagrams using Cytoscape.
term1	term2	num instances	min	max	mean	stdev
AA10	CE1	2	13	13	13	0
AA10	GH63	2	14	14	14	0
AA2	PL38	3	11	11	11	0
AA2	PL6_1	3	14	14	14	0
AA2	PL7_1	2	20	20	20	0
AA2	PL7_3	3	1	1	1	0
AA3_1	GT4	1	16	16	16	0
AA3_1	PL22	1	21	21	21	0
AA6	GH4	1	19	19	19	0
AA6	GH50	2	22	23	22.5	0.71
AA6	GT83	1	5	5	5	0
AA7	GT4	1	10	10	10	0
CBM23	S1_54	1	1	1	1	0
CBM32	S1_11	1	1	1	1	0
CBM4	CE4	1	3	3	3	0
CBM4	GH1	1	12	12	12	0
CBM4	GH10	2	2	14	8	8.49
CBM4	GH16_1	1	1	1	1	0
CBM4	GH16_14	1	2	2	2	0
CBM4	GH16_21	1	1	1	1	0
CBM4	GH30_1	1	13	13	13	0
CBM69	GH13_1	3	1	1	1	0
CBM69	GH13_10	1	3	3	3	0
CBM6	GH117	1	21	21	21	0
CBM6	GH136	2	4	9	6.5	3.54
CBM6	GH141	2	3	3	3	0
CBM6	GH150	3	1	1	1	0
CBM6	GH167	3	5	12	9.67	4.04
CBM6	GH16_11	6	1	18	9.83	6.79
CBM6	GH2	6	2	17	10.67	6.95
CBM6	GH29	1	6	6	6	0
CBM6	GH33	4	1	1	1	0
CBM6	GH43_1	4	1	1	1	0
CBM6	GH43_10	1	4	4	4	0
CBM6	GH86	2	5	5	5	0
CBM6	GT2_Glyco_tranf_2_3	4	12	18	15	3.46
CBM6	S1_15	1	5	5	5	0
CBM6	S1_17	1	5	5	5	0
CBM6	S1_20	1	2	2	2	0
CBM6	S1_72	2	2	2	2	0
CBM9	GH105	2	1	1	1	0
CBM9	GH154	1	2	2	2	0
CBM9	GH92	1	3	3	3	0
CBM9	PL8_1	1	8	8	8	0
CE12	CE8	1	7	7	7	0
CE12	GH105	1	8	8	8	0
CE12	GH28	2	2	4	3	1.41
CE12	GH43_10	1	3	3	3	0
CE12	PL1	1	1	1	1	0
CE12	PL10_1	1	5	5	5	0
CE14	GH109	1	9	9	9	0
CE14	GH31	2	3	3	3	0
CE16	GH32	1	2	2	2	0
CE17	GH105	2	2	2	2	0
CE17	GH117	3	2	5	3	1.73
CE17	GH2	5	2	12	6.6	4.1
CE17	GH86	2	3	4	3.5	0.71
CE17	GH9	1	1	1	1	0
CE17	GT2_Glyco_tranf_2_3	1	3	3	3	0
CE17	S1_19	1	13	13	13	0
CE17	S1_25	1	3	3	3	0
CE17	S1_27	2	9	9	9	0
CE17	S1_8	1	10	10	10	0
CE1	GH1	3	13	13	13	0
CE1	GH144	2	2	2	2	0
CE1	GH18	1	23	23	23	0
CE1	GH2	2	5	5	5	0
CE1	GH43_10	3	1	1	1	0
CE1	GH73	5	2	8	4.4	3.29
CE1	GH88	2	7	7	7	0
CE1	GH92	15	11	15	13	1.46
CE1	GT2_Glyco_tranf_2_3	1	10	10	10	0
CE1	GT2_Glycos_transf_2	3	4	11	8.67	4.04
CE1	GT4	3	11	15	13	2
CE1	GT41	1	6	6	6	0
CE1	S1_11	1	1	1	1	0
CE1	S1_20	1	1	1	1	0
CE2	GH5_2	1	4	4	4	0
CE2	GH9	1	1	1	1	0
CE2	PL38	1	1	1	1	0
CE2	PL6_1	1	2	2	2	0
CE3	GH13_1	1	16	16	16	0
CE3	GH20	1	17	17	17	0
CE3	GH31	1	9	9	9	0
CE3	GH36	1	13	13	13	0
CE3	GT2_Glyco_tranf_2_3	2	3	11	7	5.66
CE3	PL9_2	1	2	2	2	0
CE3	S1_29	1	6	6	6	0
CE4	GH1	1	15	15	15	0
CE4	GH10	1	17	17	17	0
CE4	GH13_1	1	1	1	1	0
CE4	GH163	1	5	5	5	0
CE4	GH16_1	1	2	2	2	0
CE4	GH16_14	1	5	5	5	0
CE4	GH2	5	2	7	3	2.24
CE4	GH3	3	1	1	1	0
CE4	GH30_1	1	16	16	16	0
CE4	GH43_1	3	3	3	3	0
CE4	GT2_Glyco_tranf_2_2	2	21	22	21.5	0.71
CE4	GT2_Glyco_tranf_2_3	1	21	21	21	0
CE4	GT2_Glycos_transf_2	9	2	23	8.33	8.09
CE6	GH10	4	1	3	1.75	0.96
CE6	GH43_10	1	2	2	2	0
CE6	PL40	1	4	4	4	0
CE6	S1_17	1	1	1	1	0
CE6	S1_28	1	2	2	2	0
CE6	S1_9	1	1	1	1	0
CE7	CE7	1	1	1	1	0
CE7	GH130	1	6	6	6	0
CE7	GH2	1	3	3	3	0
CE7	GH26	2	5	7	6	1.41
CE8	GH105	1	1	1	1	0
CE8	GH28	2	9	11	10	1.41
CE8	GH43_10	1	10	10	10	0
CE8	PL1	1	8	8	8	0
CE8	PL10_1	1	12	12	12	0
CE9	GH103	2	12	12	12	0
CE9	GH20	3	2	5	3	1.73
CE9	GT4	3	7	15	10	4.36
GH102	GH23	3	22	22	22	0
GH105	GH105	1	5	5	5	0
GH105	GH106	2	2	7	4.5	3.54
GH105	GH110	1	8	8	8	0
GH105	GH117	2	4	4	4	0
GH105	GH154	1	3	3	3	0
GH105	GH16_11	3	1	15	8.67	7.09
GH105	GH2	9	2	12	5	3.2
GH105	GH27	1	1	1	1	0
GH105	GH28	2	10	12	11	1.41
GH105	GH29	4	1	11	6	4.08
GH105	GH39	1	4	4	4	0
GH105	GH43_10	1	11	11	11	0
GH105	GH63	1	2	2	2	0
GH105	GH86	4	4	16	8.25	5.68
GH105	GH95	3	1	4	2	1.73
GH105	PL1	1	9	9	9	0
GH105	PL10_1	1	13	13	13	0
GH105	PL42	1	1	1	1	0
GH105	PL8_1	1	7	7	7	0
GH105	S1_11	1	1	1	1	0
GH105	S1_15	3	2	10	5.67	4.04
GH105	S1_27	2	7	7	7	0
GH105	S1_7	2	1	6	3.5	3.54
GH105	S1_72	1	11	11	11	0
GH105	S1_8	2	6	7	6.5	0.71
GH106	GH106	1	1	1	1	0
GH106	GH110	1	4	4	4	0
GH106	GH115	1	1	1	1	0
GH106	GH127	2	1	3	2	1.41
GH106	GH136	1	11	11	11	0
GH106	GH16_11	1	17	17	17	0
GH106	GH2	5	3	14	7.4	4.51
GH106	GH28	1	2	2	2	0
GH106	GH29	2	1	13	7	8.49
GH106	GH31	1	4	4	4	0
GH106	GH39	2	1	2	1.5	0.71
GH106	GH43_10	2	1	8	4.5	4.95
GH106	GH78	1	1	1	1	0
GH106	GH86	2	6	11	8.5	3.54
GH106	GH88	2	1	1	1	0
GH106	GH95	1	6	6	6	0
GH106	GT4	2	9	10	9.5	0.71
GH106	GT41	2	5	6	5.5	0.71
GH106	GT9	1	20	20	20	0
GH106	PL35	1	2	2	2	0
GH106	PL8_1	1	19	19	19	0
GH106	S1_27	1	2	2	2	0
GH106	S1_7	1	1	1	1	0
GH106	S1_8	2	4	5	4.5	0.71
GH109	GH16_14	1	25	25	25	0
GH109	GH20	1	13	13	13	0
GH109	GH31	1	12	12	12	0
GH109	GH35	1	21	21	21	0
GH10	GH10	26	1	11	3.5	3.41
GH10	GH16_1	7	1	15	5.57	5.13
GH10	GH16_14	1	12	12	12	0
GH10	GH16_21	1	1	1	1	0
GH10	GH2	1	2	2	2	0
GH10	GH26	2	5	11	8	4.24
GH10	GH29	6	2	10	6.83	3.43
GH10	GH3	4	1	6	3.5	2.08
GH10	GH30_1	1	1	1	1	0
GH10	GH43_1	3	2	3	2.33	0.58
GH10	GH43_10	8	1	10	3.75	2.92
GH10	GH43_11	1	1	1	1	0
GH10	GH63	6	6	17	11.5	6.02
GH10	GH88	1	5	5	5	0
GH10	GT2_Glyco_tranf_2_3	1	4	4	4	0
GH10	S1_11	5	1	9	4.4	3.78
GH10	S1_16	8	1	8	4.38	3.11
GH10	S1_43	1	1	1	1	0
GH10	S1_7	13	2	14	5.54	4.94
GH10	S1_8	6	1	12	6.5	6.02
GH110	GH110	6	1	9	4.17	3.76
GH110	GH127	12	1	8	2.5	2.07
GH110	GH133	2	14	15	14.5	0.71
GH110	GH139	1	3	3	3	0
GH110	GH13_1	1	10	10	10	0
GH110	GH150	6	2	20	8.67	6.86
GH110	GH167	3	5	5	5	0
GH110	GH16_13	3	8	10	9.33	1.15
GH110	GH16_14	1	1	1	1	0
GH110	GH2	22	1	14	4.36	4.29
GH110	GH27	1	9	9	9	0
GH110	GH29	2	2	2	2	0
GH110	GH39	1	4	4	4	0
GH110	GH78	1	3	3	3	0
GH110	GH82	4	1	9	4.75	3.86
GH110	GH95	3	1	5	3.33	2.08
GH110	GT2_Glyco_tranf_2_3	2	18	20	19	1.41
GH110	GT2_Glycos_transf_2	1	21	21	21	0
GH110	GT4	2	15	16	15.5	0.71
GH110	GT5	2	12	13	12.5	0.71
GH110	S1_15	9	1	3	1.56	0.88
GH110	S1_16	13	1	3	1.31	0.75
GH110	S1_20	3	1	10	4	5.2
GH110	S1_27	3	2	3	2.33	0.58
GH110	S1_30	3	3	3	3	0
GH110	S1_4	2	2	4	3	1.41
GH110	S1_46	2	1	3	2	1.41
GH110	S1_8	21	1	21	5.24	5.22
GH115	GH117	1	3	3	3	0
GH115	GH16_11	2	1	23	12	15.56
GH115	GH2	1	1	1	1	0
GH115	GH28	1	3	3	3	0
GH115	GH43_1	1	6	6	6	0
GH115	GH67	1	1	1	1	0
GH115	GH86	3	1	1	1	0
GH115	GT9	1	19	19	19	0
GH115	PL8_1	1	18	18	18	0
GH115	S1_24	2	1	1	1	0
GH116	GH2	1	3	3	3	0
GH116	GH39	1	1	1	1	0
GH117	GH117	8	1	5	3.25	1.39
GH117	GH133	1	3	3	3	0
GH117	GH136	2	11	11	11	0
GH117	GH141	3	1	6	3.33	2.52
GH117	GH167	1	9	9	9	0
GH117	GH16_11	17	1	14	4.35	3.6
GH117	GH16_14	1	1	1	1	0
GH117	GH2	28	1	10	3.39	3.21
GH117	GH23	1	3	3	3	0
GH117	GH29	8	1	11	3.62	3.78
GH117	GH3	1	14	14	14	0
GH117	GH30_1	1	5	5	5	0
GH117	GH31	1	2	2	2	0
GH117	GH43_1	3	1	7	3	3.46
GH117	GH43_10	6	1	4	2	1.1
GH117	GH50	1	9	9	9	0
GH117	GH57	1	1	1	1	0
GH117	GH77	1	2	2	2	0
GH117	GH86	8	1	16	4.5	4.78
GH117	GT2_Glycos_transf_2	1	6	6	6	0
GH117	GT35	1	4	4	4	0
GH117	GT4	1	2	2	2	0
GH117	PL9_2	1	12	12	12	0
GH117	S1_11	3	1	1	1	0
GH117	S1_15	3	6	8	7.33	1.15
GH117	S1_16	1	1	1	1	0
GH117	S1_17	1	8	8	8	0
GH117	S1_19	8	2	7	4.25	2.49
GH117	S1_24	1	7	7	7	0
GH117	S1_27	2	11	11	11	0
GH117	S1_28	1	1	1	1	0
GH117	S1_72	1	1	1	1	0
GH117	S1_8	2	2	5	3.5	2.12
GH121	GH2	3	1	8	3.33	4.04
GH121	GH36	1	7	7	7	0
GH121	S1_15	2	6	6	6	0
GH121	S1_16	2	2	2	2	0
GH121	S1_19	1	1	1	1	0
GH125	GH92	3	1	1	1	0
GH127	GH13_1	1	3	3	3	0
GH127	GH13_10	1	2	2	2	0
GH127	GH150	3	2	13	9.33	6.35
GH127	GH167	1	1	1	1	0
GH127	GH16_11	2	4	9	6.5	3.54
GH127	GH16_13	2	8	8	8	0
GH127	GH2	15	1	12	4	3.8
GH127	GH28	1	1	1	1	0
GH127	GH33	1	1	1	1	0
GH127	GH78	1	2	2	2	0
GH127	GH82	3	4	5	4.67	0.58
GH127	GT2_Glyco_tranf_2_3	1	18	18	18	0
GH127	GT2_Glycos_transf_2	1	19	19	19	0
GH127	S1_14	1	2	2	2	0
GH127	S1_15	1	3	3	3	0
GH127	S1_16	21	1	6	1.9	1.41
GH127	S1_19	2	5	5	5	0
GH127	S1_20	3	3	4	3.67	0.58
GH127	S1_27	2	1	1	1	0
GH127	S1_30	5	1	10	4.6	4.93
GH127	S1_4	1	1	1	1	0
GH127	S1_8	9	1	14	6.56	3.47
GH127	S1_N.C.	3	1	1	1	0
GH128	GH16_1	3	1	1	1	0
GH128	GH16_13	1	1	1	1	0
GH128	S1_20	2	1	1	1	0
GH130	GH2	2	7	7	7	0
GH130	GH26	14	1	7	2.21	2.08
GH130	GH43_1	2	5	9	7	2.83
GH130	GH5_41	4	1	5	3	2.31
GH130	GT2_Glyco_tranf_2_3	1	11	11	11	0
GH130	GT2_Glycos_transf_2	4	6	18	9	6
GH130	GT4	1	12	12	12	0
GH130	S1_16	1	7	7	7	0
GH130	S1_17	13	1	8	2.92	1.75
GH130	S1_51	1	3	3	3	0
GH133	GH13_10	1	1	1	1	0
GH133	GH2	1	7	7	7	0
GH133	GH57	16	2	2	2	0
GH133	GT3	4	1	1	1	0
GH133	GT35	9	1	3	1.22	0.67
GH133	GT4	36	1	1	1	0
GH133	GT5	4	2	2	2	0
GH133	S1_16	4	13	14	13.5	0.58
GH136	GH136	18	1	5	1.89	1.23
GH136	GH16_11	15	1	6	3.27	1.39
GH136	GH16_14	1	1	1	1	0
GH136	GH2	13	1	10	3.85	3.02
GH136	GH29	4	1	5	2.75	1.71
GH136	GH3	1	3	3	3	0
GH136	GH33	2	3	8	5.5	3.54
GH136	GH43_10	1	1	1	1	0
GH136	GH97	1	1	1	1	0
GH136	PL35	2	1	1	1	0
GH136	S1_15	9	1	19	6	7.45
GH136	S1_17	1	2	2	2	0
GH136	S1_19	3	3	18	13	8.66
GH136	S1_23	1	2	2	2	0
GH136	S1_29	8	2	7	5.12	1.81
GH136	S1_7	2	1	3	2	1.41
GH136	S1_72	4	2	7	4	2.16
GH139	GH36	1	2	2	2	0
GH139	GH95	1	2	2	2	0
GH13_10	GH13_10	5	1	2	1.4	0.55
GH13_10	GH13_25	2	1	2	1.5	0.71
GH13_10	GH13_3	1	1	1	1	0
GH13_10	GH2	1	17	17	17	0
GH13_10	GH28	1	1	1	1	0
GH13_10	GH43_10	1	5	5	5	0
GH13_10	GH53	1	6	6	6	0
GH13_10	GH57	1	3	3	3	0
GH13_10	GH77	9	1	6	2.22	1.99
GH13_10	GT2_Glycos_transf_2	1	13	13	13	0
GH13_10	GT35	18	1	9	2.72	2.32
GH13_10	GT4	7	1	16	4.43	5.16
GH13_10	GT5	1	3	3	3	0
GH13_10	GT51	3	1	1	1	0
GH13_13	GH23	1	15	15	15	0
GH13_13	GH97	2	5	5	5	0
GH13_13	GT4	1	19	19	19	0
GH13_17	GH13_35	1	2	2	2	0
GH13_1	GH13_1	35	1	9	2.26	1.75
GH13_1	GH13_10	20	1	8	3.4	2.23
GH13_1	GH13_13	5	1	2	1.4	0.55
GH13_1	GH13_25	7	1	6	4.14	2.41
GH13_1	GH16_11	3	7	10	8.67	1.53
GH13_1	GH16_13	1	2	2	2	0
GH13_1	GH2	1	9	9	9	0
GH13_1	GH20	4	1	7	4.5	2.65
GH13_1	GH28	1	2	2	2	0
GH13_1	GH3	1	4	4	4	0
GH13_1	GH31	1	7	7	7	0
GH13_1	GH32	2	1	1	1	0
GH13_1	GH36	1	3	3	3	0
GH13_1	GH4	2	4	4	4	0
GH13_1	GH43_10	5	9	25	12.6	6.95
GH13_1	GH57	1	8	8	8	0
GH13_1	GH65	2	5	5	5	0
GH13_1	GH77	22	1	8	2.73	2.05
GH13_1	GH97	18	1	7	4.61	1.69
GH13_1	GT2_Glyco_tranf_2_3	1	6	6	6	0
GH13_1	GT2_Glycos_transf_2	6	15	22	18.67	2.94
GH13_1	GT35	24	1	16	3.88	4.53
GH13_1	GT4	12	1	18	4.58	4.66
GH13_1	GT5	3	2	2	2	0
GH13_1	GT51	3	1	1	1	0
GH13_1	GT83	3	7	23	17.67	9.24
GH13_1	S1_16	1	9	9	9	0
GH13_1	S1_28	1	19	19	19	0
GH13_25	GH16_11	2	13	13	13	0
GH13_25	GH29	2	14	14	14	0
GH13_25	GH4	1	5	5	5	0
GH13_25	GH57	4	2	2	2	0
GH13_25	GH77	1	7	7	7	0
GH13_25	GT35	2	1	8	4.5	4.95
GH13_25	GT4	10	1	1	1	0
GH13_25	GT5	3	2	3	2.67	0.58
GH13_25	S1_19	2	12	12	12	0
GH13_3	GT35	1	2	2	2	0
GH140	GH16_13	3	1	1	1	0
GH140	GH2	2	4	4	4	0
GH140	GH26	1	1	1	1	0
GH140	GH3	2	3	3	3	0
GH140	GH43_1	2	2	2	2	0
GH140	GH5_22	1	1	1	1	0
GH140	S1_25	1	1	1	1	0
GH141	GH141	5	1	4	2.2	1.64
GH141	GH16_11	3	1	15	10.33	8.08
GH141	GH2	14	1	14	3.57	4.52
GH141	GH28	2	1	1	1	0
GH141	GH29	2	2	4	3	1.41
GH141	GH31	2	1	5	3	2.83
GH141	GH43_10	1	1	1	1	0
GH141	GH86	1	5	5	5	0
GH141	GT5	1	8	8	8	0
GH141	S1_17	3	1	1	1	0
GH141	S1_24	3	3	3	3	0
GH141	S1_25	3	2	2	2	0
GH141	S1_28	3	1	1	1	0
GH141	S1_30	1	2	2	2	0
GH141	S1_40	1	1	1	1	0
GH141	S1_72	1	4	4	4	0
GH144	GH144	1	1	1	1	0
GH144	GH2	2	7	7	7	0
GH144	GH43_10	2	1	1	1	0
GH144	GH94	1	9	9	9	0
GH144	S1_11	2	3	13	8	7.07
GH144	S1_19	5	1	11	4.8	4.15
GH144	S1_8	1	8	8	8	0
GH147	GH2	1	8	8	8	0
GH147	GH82	1	1	1	1	0
GH149	GH77	1	5	5	5	0
GH150	GH150	1	4	4	4	0
GH150	GH167	2	1	4	2.5	2.12
GH150	GH2	12	1	12	6.92	4.93
GH150	GH43_1	3	1	2	1.67	0.58
GH150	GH43_10	1	3	3	3	0
GH150	GH82	4	2	8	5	3.46
GH150	GH86	1	1	1	1	0
GH150	S1_15	9	1	5	1.78	1.56
GH150	S1_16	5	1	11	5.4	5.18
GH150	S1_17	1	2	2	2	0
GH150	S1_20	3	3	9	7	3.46
GH150	S1_30	4	1	3	2	1.15
GH150	S1_8	20	1	9	3.45	2.65
GH150	S1_N.C.	1	14	14	14	0
GH154	PL8_1	1	10	10	10	0
GH159	GH5_13	1	1	1	1	0
GH165	GH165	3	1	2	1.67	0.58
GH167	GH16_11	3	5	9	6.33	2.31
GH167	GH2	7	1	4	2.43	1.13
GH167	GH36	2	1	1	1	0
GH167	GH43_1	4	1	6	2.5	2.38
GH167	GH43_10	1	1	1	1	0
GH167	GH82	1	2	2	2	0
GH167	GH86	2	7	7	7	0
GH167	GT2_Glyco_tranf_2_3	2	24	24	24	0
GH167	S1_15	1	8	8	8	0
GH167	S1_20	1	20	20	20	0
GH167	S1_8	2	1	1	1	0
GH167	S1_N.C.	1	2	2	2	0
GH168	GH31	2	7	13	10	4.24
GH168	S1_17	1	15	15	15	0
GH16_11	GH16_11	6	1	3	1.5	0.84
GH16_11	GH16_12	1	1	1	1	0
GH16_11	GH16_3	1	19	19	19	0
GH16_11	GH18	1	17	17	17	0
GH16_11	GH2	33	1	16	5.3	4.63
GH16_11	GH20	2	3	18	10.5	10.61
GH16_11	GH23	1	2	2	2	0
GH16_11	GH28	2	1	4	2.5	2.12
GH16_11	GH29	17	1	13	2.88	3.5
GH16_11	GH3	2	6	7	6.5	0.71
GH16_11	GH33	2	1	7	4	4.24
GH16_11	GH43_10	3	1	2	1.67	0.58
GH16_11	GH57	2	15	15	15	0
GH16_11	GH77	4	1	6	2.75	2.22
GH16_11	GH82	2	7	12	9.5	3.54
GH16_11	GH86	7	2	17	6.14	5.21
GH16_11	GH95	1	11	11	11	0
GH16_11	GT2_Glyco_tranf_2_3	4	19	25	22	3.46
GH16_11	GT4	6	9	14	11.33	2.25
GH16_11	GT5	2	10	10	10	0
GH16_11	PL6_1	1	5	5	5	0
GH16_11	S1_11	3	2	4	2.67	1.15
GH16_11	S1_15	7	1	16	9.57	7.44
GH16_11	S1_16	5	2	10	6.4	3.05
GH16_11	S1_17	4	1	17	6	7.39
GH16_11	S1_19	11	1	16	7.36	7.15
GH16_11	S1_24	4	3	24	12.25	10.4
GH16_11	S1_25	1	3	3	3	0
GH16_11	S1_29	1	3	3	3	0
GH16_11	S1_4	1	2	2	2	0
GH16_11	S1_51	3	2	2	2	0
GH16_11	S1_7	1	16	16	16	0
GH16_11	S1_72	8	2	6	3.38	1.92
GH16_11	S1_8	1	8	8	8	0
GH16_12	GH2	1	1	1	1	0
GH16_12	GH43	1	1	1	1	0
GH16_12	GH82	1	6	6	6	0
GH16_12	PL40	1	2	2	2	0
GH16_13	GH2	2	3	11	7	5.66
GH16_13	GH3	2	2	2	2	0
GH16_13	GH43_1	4	1	1	1	0
GH16_13	GH43_10	1	2	2	2	0
GH16_13	GH5_22	1	2	2	2	0
GH16_13	GH73	1	7	7	7	0
GH16_13	GH94	1	1	1	1	0
GH16_13	GT2_Glyco_tranf_2_3	1	10	10	10	0
GH16_13	GT2_Glycos_transf_2	1	11	11	11	0
GH16_13	GT9	1	9	9	9	0
GH16_13	S1_16	3	7	9	8.33	1.15
GH16_13	S1_20	1	2	2	2	0
GH16_13	S1_30	1	7	7	7	0
GH16_14	GH30_1	1	11	11	11	0
GH16_14	GH31	2	13	13	13	0
GH16_14	GH35	1	4	4	4	0
GH16_14	GH86	1	1	1	1	0
GH16_18	GT2_Glyco_tranf_2_3	1	3	3	3	0
GH16_1	GH16_13	1	9	9	9	0
GH16_1	GH16_14	1	3	3	3	0
GH16_1	GH16_21	1	1	1	1	0
GH16_1	GH26	1	12	12	12	0
GH16_1	GH30_1	1	14	14	14	0
GH16_1	GH43_10	3	3	3	3	0
GH16_1	GH94	1	10	10	10	0
GH16_1	S1_11	3	1	1	1	0
GH16_21	GH43_1	1	1	1	1	0
GH16_3	GH18	1	2	2	2	0
GH16_3	GH2	1	4	4	4	0
GH16_3	GH20	2	1	1	1	0
GH16_3	GH33	1	18	18	18	0
GH16_3	PL6_1	1	14	14	14	0
GH170	GT2_Glyco_tranf_2_3	2	6	23	14.5	12.02
GH171	GH3	2	2	21	11.5	13.44
GH171	GT2_Glyco_tranf_2_3	2	5	5	5	0
GH171	GT2_Glycos_transf_2	1	10	10	10	0
GH171	GT4	1	11	11	11	0
GH171	GT83	1	10	10	10	0
GH171	S1_11	1	2	2	2	0
GH171	S1_23	1	23	23	23	0
GH18	GH18	1	1	1	1	0
GH18	GH2	3	2	2	2	0
GH18	GH20	3	1	1	1	0
GH18	GH33	1	16	16	16	0
GH18	GT2_Glycos_transf_2	2	14	15	14.5	0.71
GH18	PL6_1	1	12	12	12	0
GH18	S1_11	3	1	1	1	0
GH19	GH19	3	1	2	1.33	0.58
GH1	GH10	1	2	2	2	0
GH1	GH13_1	1	11	11	11	0
GH1	GH13_10	1	10	10	10	0
GH1	GH16_1	1	13	13	13	0
GH1	GH16_14	1	10	10	10	0
GH1	GH18	1	10	10	10	0
GH1	GH30_1	1	1	1	1	0
GH1	GH38	1	2	2	2	0
GH1	GH77	1	6	6	6	0
GH1	GH94	1	1	1	1	0
GH1	GT2_Glycos_transf_2	2	5	17	11	8.49
GH1	GT35	1	5	5	5	0
GH1	GT4	1	7	7	7	0
GH1	GT5	1	17	17	17	0
GH1	PL22	2	20	20	20	0
GH1	S1_13	3	2	2	2	0
GH20	GH20	1	1	1	1	0
GH20	GH31	1	8	8	8	0
GH20	GH33	3	1	17	6.67	8.96
GH20	GH36	1	4	4	4	0
GH20	GH38	3	18	18	18	0
GH20	GH77	1	3	3	3	0
GH20	GH78	2	1	1	1	0
GH20	GH9	2	2	2	2	0
GH20	GT2_Glyco_tranf_2_3	1	3	3	3	0
GH20	GT2_Glycos_transf_2	1	24	24	24	0
GH20	GT35	1	12	12	12	0
GH20	GT8	1	6	6	6	0
GH20	PL6_1	1	13	13	13	0
GH20	S1_11	2	2	2	2	0
GH23	GH37	5	18	18	18	0
GH23	GH39	1	4	4	4	0
GH23	GH57	1	4	4	4	0
GH23	GH77	1	1	1	1	0
GH23	GT2_Glyco_tranf_2_3	2	1	7	4	4.24
GH23	GT2_Glyco_tranf_2_5	1	6	6	6	0
GH23	GT2_Glycos_transf_2	1	17	17	17	0
GH23	GT4	3	4	9	6	2.65
GH23	S1_15	1	2	2	2	0
GH25	GT2_Glyco_tranf_2_3	1	6	6	6	0
GH25	GT2_Glycos_transf_2	1	8	8	8	0
GH26	GH26	14	1	4	2	1.18
GH26	GH3	2	1	1	1	0
GH26	GH43_1	1	2	2	2	0
GH26	GH43_10	11	1	15	4.09	4.18
GH26	GH5_19	2	2	5	3.5	2.12
GH26	GH5_2	3	5	6	5.33	0.58
GH26	GH5_41	12	1	6	3.5	1.78
GH26	GH82	1	4	4	4	0
GH26	GT2_Glycos_transf_2	4	7	19	10	6
GH26	GT4	1	13	13	13	0
GH26	GT9	2	2	3	2.5	0.71
GH26	S1_11	1	1	1	1	0
GH26	S1_17	24	1	7	2.58	1.74
GH26	S1_51	5	1	6	3.4	2.07
GH26	S1_8	1	1	1	1	0
GH27	GH27	2	1	1	1	0
GH27	GH28	2	1	1	1	0
GH27	GH36	1	2	2	2	0
GH27	GH39	1	5	5	5	0
GH27	GH43_10	5	1	3	1.8	0.84
GH27	GH43_17	1	2	2	2	0
GH27	S1_15	1	6	6	6	0
GH27	S1_20	1	5	5	5	0
GH27	S1_22	1	8	8	8	0
GH27	S1_8	3	7	9	8	1
GH28	GH28	1	2	2	2	0
GH28	GH29	2	1	9	5	5.66
GH28	GH3	2	7	7	7	0
GH28	GH35	1	1	1	1	0
GH28	GH43_1	1	2	2	2	0
GH28	GH43_10	7	1	4	1.71	1.11
GH28	GH43_17	2	1	1	1	0
GH28	GH78	2	3	3	3	0
GH28	GH88	1	2	2	2	0
GH28	GH97	2	1	18	9.5	12.02
GH28	GT2_Glyco_tranf_2_3	3	5	14	9	4.58
GH28	GT4	2	16	17	16.5	0.71
GH28	GT9	1	22	22	22	0
GH28	PL1	2	1	3	2	1.41
GH28	PL10_1	2	1	3	2	1.41
GH28	PL8_1	1	21	21	21	0
GH28	S1_17	1	19	19	19	0
GH28	S1_20	2	3	4	3.5	0.71
GH28	S1_22	1	7	7	7	0
GH28	S1_23	1	20	20	20	0
GH28	S1_25	1	1	1	1	0
GH28	S1_28	4	1	1	1	0
GH28	S1_62	1	19	19	19	0
GH28	S1_8	1	8	8	8	0
GH29	GH29	15	1	10	1.87	2.39
GH29	GH31	1	3	3	3	0
GH29	GH33	1	5	5	5	0
GH29	GH43	1	1	1	1	0
GH29	GH43_10	4	1	7	2.5	3
GH29	GH57	2	16	16	16	0
GH29	GH63	1	1	1	1	0
GH29	GH82	3	7	11	8.33	2.31
GH29	GH86	3	2	5	3	1.73
GH29	GH95	4	1	7	4.25	3.2
GH29	GH97	1	2	2	2	0
GH29	GT19	2	7	7	7	0
GH29	GT28	4	6	7	6.5	0.58
GH29	GT2_Glyco_tranf_2_3	2	5	13	9	5.66
GH29	GT2_Glycos_transf_2	5	6	14	9.2	3.35
GH29	GT3	1	4	4	4	0
GH29	GT4	16	3	18	8.19	4.53
GH29	GT5	2	11	11	11	0
GH29	S1_11	4	1	1	1	0
GH29	S1_15	4	1	3	1.5	1
GH29	S1_17	3	3	8	5	2.65
GH29	S1_19	3	1	2	1.67	0.58
GH29	S1_24	4	1	3	1.5	1
GH29	S1_25	5	1	2	1.8	0.45
GH29	S1_28	3	4	10	6.33	3.21
GH29	S1_51	1	1	1	1	0
GH29	S1_7	1	12	12	12	0
GH29	S1_72	5	3	7	4	1.73
GH29	S1_8	2	5	6	5.5	0.71
GH2	GH2	38	1	15	5.08	4.56
GH2	GH20	3	3	3	3	0
GH2	GH23	5	14	22	17.2	4.38
GH2	GH26	4	4	11	8	3.16
GH2	GH27	5	2	3	2.4	0.55
GH2	GH28	4	2	16	9.5	7.55
GH2	GH29	29	1	12	3.45	3.43
GH2	GH3	15	1	13	2.67	3.83
GH2	GH30_1	2	1	1	1	0
GH2	GH30_4	1	1	1	1	0
GH2	GH31	7	1	4	1.71	1.11
GH2	GH32	6	2	21	8.67	9.56
GH2	GH33	3	14	17	16	1.73
GH2	GH36	7	1	7	3.43	2.23
GH2	GH37	3	4	4	4	0
GH2	GH39	9	1	8	3.11	2.67
GH2	GH42	1	1	1	1	0
GH2	GH43_1	12	1	3	1.42	0.67
GH2	GH43_10	15	1	6	3	1.69
GH2	GH50	2	1	1	1	0
GH2	GH73	2	12	12	12	0
GH2	GH78	1	1	1	1	0
GH2	GH82	24	1	23	5.79	5.45
GH2	GH86	19	1	9	4.53	3.04
GH2	GH92	2	1	5	3	2.83
GH2	GH95	8	1	8	3.62	3.38
GH2	GT111	1	3	3	3	0
GH2	GT2_Glyco_tranf_2_3	7	4	25	15	9.29
GH2	GT2_Glyco_tranf_2_5	1	12	12	12	0
GH2	GT2_Glycos_transf_2	12	4	22	6	5.33
GH2	GT3	1	6	6	6	0
GH2	GT35	1	15	15	15	0
GH2	GT4	10	4	13	7.8	2.7
GH2	GT9	3	7	14	11.67	4.04
GH2	PL6_1	1	10	10	10	0
GH2	S1_11	7	1	4	1.43	1.13
GH2	S1_13	3	13	13	13	0
GH2	S1_14	1	2	2	2	0
GH2	S1_15	15	1	9	4.33	3.09
GH2	S1_16	37	1	10	3.11	2.44
GH2	S1_17	10	1	9	2.7	2.5
GH2	S1_19	12	1	8	2.67	2.74
GH2	S1_20	28	1	24	3	4.84
GH2	S1_22	1	5	5	5	0
GH2	S1_23	1	1	1	1	0
GH2	S1_24	7	1	19	5.14	6.26
GH2	S1_25	3	3	6	4.33	1.53
GH2	S1_27	3	1	1	1	0
GH2	S1_28	7	1	17	7.86	8.25
GH2	S1_30	7	2	9	5.71	3.04
GH2	S1_4	4	2	4	2.75	0.96
GH2	S1_46	1	6	6	6	0
GH2	S1_51	1	5	5	5	0
GH2	S1_7	2	4	13	8.5	6.36
GH2	S1_72	6	1	8	2.17	2.86
GH2	S1_8	42	1	22	5.29	4.56
GH2	S1_N.C.	4	1	13	5	5.48
GH30_1	GH30_1	1	1	1	1	0
GH30_1	GH39	3	1	2	1.33	0.58
GH30_1	GH43_1	2	1	2	1.5	0.71
GH30_1	GH92	1	4	4	4	0
GH30_1	S1_11	1	1	1	1	0
GH30_1	S1_4	2	4	4	4	0
GH30_1	S1_46	1	5	5	5	0
GH30_1	S1_62	2	1	1	1	0
GH30_4	GH43_1	1	3	3	3	0
GH30_4	S1_16	1	3	3	3	0
GH30_4	S1_19	1	4	4	4	0
GH30_4	S1_20	1	3	3	3	0
GH30_4	S1_8	1	1	1	1	0
GH30	GT2_Glyco_tranf_2_3	1	5	5	5	0
GH30	GT90	1	13	13	13	0
GH30	S1_14	1	11	11	11	0
GH31	GH31	4	1	6	2.25	2.5
GH31	GH35	1	17	17	17	0
GH31	GH36	1	4	4	4	0
GH31	GH43_10	1	4	4	4	0
GH31	GH86	1	2	2	2	0
GH31	GH88	1	2	2	2	0
GH31	GH95	1	1	1	1	0
GH31	GT4	5	5	22	14	8.09
GH31	PL40	10	1	10	3.1	3.45
GH31	S1_14	1	13	13	13	0
GH31	S1_17	4	2	8	4.25	2.63
GH31	S1_19	2	1	3	2	1.41
GH31	S1_25	1	2	2	2	0
GH31	S1_7	1	1	1	1	0
GH32	GH43_10	2	1	1	1	0
GH32	GH65	3	4	4	4	0
GH32	S1_11	1	3	3	3	0
GH32	S1_16	1	4	4	4	0
GH32	S1_17	1	1	1	1	0
GH33	GT2_Glyco_tranf_2_3	1	11	11	11	0
GH33	GT2_Glycos_transf_2	1	3	3	3	0
GH33	GT8	2	2	2	2	0
GH33	PL6_1	1	4	4	4	0
GH33	S1_15	1	4	4	4	0
GH33	S1_24	1	2	2	2	0
GH33	S1_27	1	18	18	18	0
GH33	S1_72	2	1	1	1	0
GH36	GT99	1	4	4	4	0
GH36	S1_13	2	16	16	16	0
GH36	S1_15	1	1	1	1	0
GH36	S1_16	1	5	5	5	0
GH39	GH39	1	1	1	1	0
GH39	GH88	1	4	4	4	0
GH39	PL13	3	1	3	2	1
GH39	PL39	1	4	4	4	0
GH39	S1_15	3	1	4	3	1.73
GH39	S1_16	2	5	5	5	0
GH39	S1_20	4	2	2	2	0
GH39	S1_8	3	2	5	3.33	1.53
GH3	GH36	1	1	1	1	0
GH3	GH43_1	11	1	2	1.55	0.52
GH3	GH43_10	1	5	5	5	0
GH3	GH5_1	1	4	4	4	0
GH3	GH5_22	1	4	4	4	0
GH3	GH65	1	25	25	25	0
GH3	GH78	4	1	10	5.5	5.2
GH3	GH97	1	1	1	1	0
GH3	GT2_Glyco_tranf_2_3	1	10	10	10	0
GH3	GT2_Glyco_tranf_2_5	1	10	10	10	0
GH3	GT4	1	12	12	12	0
GH3	PL40	1	2	2	2	0
GH3	S1_15	3	2	22	8.67	11.55
GH3	S1_16	2	3	3	3	0
GH3	S1_19	1	21	21	21	0
GH3	S1_28	1	14	14	14	0
GH3	S1_62	2	3	3	3	0
GH3	S1_8	1	22	22	22	0
GH43_10	GH43_10	5	1	1	1	0
GH43_10	GH43_17	1	3	3	3	0
GH43_10	GH50	1	12	12	12	0
GH43_10	GH5_13	1	5	5	5	0
GH43_10	GH82	1	3	3	3	0
GH43_10	GH86	2	2	5	3.5	2.12
GH43_10	GH97	5	1	4	2.8	1.3
GH43_10	GT2_Glycos_transf_2	2	10	10	10	0
GH43_10	GT3	1	5	5	5	0
GH43_10	GT4	4	1	7	4.25	3.2
GH43_10	GT9	1	1	1	1	0
GH43_10	PL1	1	2	2	2	0
GH43_10	PL10_1	1	2	2	2	0
GH43_10	PL40	2	2	3	2.5	0.71
GH43_10	S1_11	2	2	2	2	0
GH43_10	S1_14	2	1	3	2	1.41
GH43_10	S1_17	2	2	3	2.5	0.71
GH43_10	S1_19	1	3	3	3	0
GH43_10	S1_20	3	1	3	2	1
GH43_10	S1_22	2	5	6	5.5	0.71
GH43_10	S1_28	6	3	6	4.33	1.37
GH43_10	S1_4	3	2	4	2.67	1.15
GH43_10	S1_51	3	1	1	1	0
GH43_10	S1_7	1	4	4	4	0
GH43_10	S1_8	3	1	7	4.67	3.21
GH43_17	S1_20	2	2	3	2.5	0.71
GH43_17	S1_7	1	2	2	2	0
GH43_17	S1_8	1	1	1	1	0
GH43_1	GH43_1	2	1	1	1	0
GH43_1	GH43_10	9	1	5	2.33	1.8
GH43_1	GH43_17	1	1	1	1	0
GH43_1	GH49	4	1	3	1.75	0.96
GH43_1	GH5_13	1	4	4	4	0
GH43_1	GH5_22	1	3	3	3	0
GH43_1	GH86	2	1	7	4	4.24
GH43_1	GH92	4	1	3	2	0.82
GH43_1	GT2_Glycos_transf_2	1	15	15	15	0
GH43_1	GT4	2	12	14	13	1.41
GH43_1	PL40	3	1	2	1.33	0.58
GH43_1	S1_11	2	1	2	1.5	0.71
GH43_1	S1_12	1	1	1	1	0
GH43_1	S1_14	1	2	2	2	0
GH43_1	S1_16	5	1	6	2.6	2.3
GH43_1	S1_17	7	1	7	2.14	2.19
GH43_1	S1_19	2	7	9	8	1.41
GH43_1	S1_20	2	1	1	1	0
GH43_1	S1_28	2	1	11	6	7.07
GH43_1	S1_31	1	2	2	2	0
GH43_1	S1_4	3	1	3	1.67	1.15
GH43_1	S1_46	2	3	4	3.5	0.71
GH43_1	S1_51	1	2	2	2	0
GH43_1	S1_52	1	4	4	4	0
GH43_1	S1_7	1	1	1	1	0
GH43_1	S1_72	1	8	8	8	0
GH43_1	S1_N.C.	1	3	3	3	0
GH43_2	S1_53	1	7	7	7	0
GH43_2	S1_N.C.	1	5	5	5	0
GH49	GH49	18	1	5	2.17	1.25
GH49	PL9_2	1	2	2	2	0
GH49	S1_4	1	1	1	1	0
GH4	GT2_Glycos_transf_2	1	17	17	17	0
GH50	GH50	2	1	1	1	0
GH50	GH86	1	2	2	2	0
GH50	S1_11	4	1	3	2	0.82
GH50	S1_4	1	3	3	3	0
GH57	GH88	1	7	7	7	0
GH57	GT3	2	1	1	1	0
GH57	GT35	2	1	3	2	1.41
GH57	GT4	38	1	1	1	0
GH57	GT5	5	2	5	4	1.22
GH57	S1_16	2	15	16	15.5	0.71
GH57	S1_19	2	14	14	14	0
GH5_10	GH5_10	1	4	4	4	0
GH5_10	GH5_22	2	1	3	2	1.41
GH5_13	PL9_2	1	2	2	2	0
GH5_13	S1_14	1	2	2	2	0
GH5_13	S1_4	3	1	3	1.67	1.15
GH5_19	S1_17	1	1	1	1	0
GH5_1	GH78	1	3	3	3	0
GH5_1	PL40	1	2	2	2	0
GH5_29	GH78	1	2	2	2	0
GH5_29	PL40	1	1	1	1	0
GH5_2	GH5_25	1	1	1	1	0
GH5_2	GH5_30	1	1	1	1	0
GH5_2	GH5_41	1	1	1	1	0
GH5_2	GH8	1	1	1	1	0
GH5_41	S1_17	4	2	3	2.25	0.5
GH5_41	S1_51	2	2	2	2	0
GH63	S1_11	1	15	15	15	0
GH63	S1_16	3	14	14	14	0
GH63	S1_7	3	20	20	20	0
GH63	S1_8	3	5	5	5	0
GH65	GH65	1	1	1	1	0
GH73	GH88	2	9	9	9	0
GH73	GH92	10	19	23	21	1.49
GH73	GT2_Glycos_transf_2	2	8	8	8	0
GH73	GT9	4	2	2	2	0
GH76	GH92	1	12	12	12	0
GH77	GH97	6	1	19	5.17	7.33
GH77	GT25	1	12	12	12	0
GH77	GT2_Glycos_transf_2	2	11	15	13	2.83
GH77	GT3	2	4	4	4	0
GH77	GT35	14	1	3	1.21	0.58
GH77	GT4	2	17	20	18.5	2.12
GH77	GT51	3	2	2	2	0
GH78	GH9	1	3	3	3	0
GH78	PL40	2	1	1	1	0
GH78	S1_14	1	5	5	5	0
GH78	S1_25	1	1	1	1	0
GH78	S1_27	2	1	2	1.5	0.71
GH78	S1_8	2	5	6	5.5	0.71
GH82	GH82	4	1	9	5	4.08
GH82	GT2_Glyco_tranf_2_3	1	19	19	19	0
GH82	PL6_1	1	9	9	9	0
GH82	S1_15	1	6	6	6	0
GH82	S1_16	8	1	6	3.12	1.36
GH82	S1_17	1	15	15	15	0
GH82	S1_20	11	1	9	1.73	2.41
GH82	S1_24	2	8	8	8	0
GH82	S1_25	1	9	9	9	0
GH82	S1_30	3	3	5	4.33	1.15
GH82	S1_72	1	14	14	14	0
GH82	S1_8	17	1	11	3.18	3.43
GH82	S1_N.C.	1	6	6	6	0
GH86	GH86	4	1	10	3.25	4.5
GH86	GH95	2	5	5	5	0
GH86	GT2_Glyco_tranf_2_3	4	17	23	20	3.46
GH86	GT4	2	3	4	3.5	0.71
GH86	S1_19	1	8	8	8	0
GH86	S1_23	1	1	1	1	0
GH86	S1_25	1	7	7	7	0
GH86	S1_30	1	3	3	3	0
GH86	S1_4	2	5	5	5	0
GH86	S1_7	1	10	10	10	0
GH86	S1_72	1	1	1	1	0
GH86	S1_8	1	7	7	7	0
GH88	GH97	1	3	3	3	0
GH88	GT2_Glyco_tranf_2_3	2	1	1	1	0
GH88	GT4	1	8	8	8	0
GH88	PL29	10	1	2	1.2	0.42
GH88	PL30	1	4	4	4	0
GH88	PL35	2	1	1	1	0
GH88	PL39	1	1	1	1	0
GH88	PL6_1	1	5	5	5	0
GH88	S1_11	1	3	3	3	0
GH88	S1_23	1	1	1	1	0
GH88	S1_7	2	1	3	2	1.41
GH89	S1_16	1	1	1	1	0
GH8	GH9	1	9	9	9	0
GH8	GT19	1	11	11	11	0
GH8	GT2_Glycos_transf_2	1	12	12	12	0
GH92	GH92	33	1	4	1.91	1.01
GH92	GH99	1	7	7	7	0
GH92	GT4	1	2	2	2	0
GH92	S1_11	1	1	1	1	0
GH92	S1_12	2	2	3	2.5	0.71
GH92	S1_16	2	1	1	1	0
GH92	S1_46	1	1	1	1	0
GH92	S1_51	2	3	4	3.5	0.71
GH92	S1_52	3	1	6	4	2.65
GH92	S1_N.C.	2	1	2	1.5	0.71
GH94	GT2_Glycos_transf_2	1	18	18	18	0
GH95	GH95	1	1	1	1	0
GH95	PL8_1	1	1	1	1	0
GH95	PL9_2	1	3	3	3	0
GH95	S1_15	1	1	1	1	0
GH95	S1_16	2	1	2	1.5	0.71
GH95	S1_7	1	5	5	5	0
GH95	S1_8	3	2	4	3	1
GH97	GH97	1	2	2	2	0
GH97	GT28	2	9	9	9	0
GH97	GT2_Glycos_transf_2	1	16	16	16	0
GH97	GT3	4	5	8	6	1.41
GH97	PL40	1	1	1	1	0
GH97	S1_14	1	2	2	2	0
GH97	S1_15	1	1	1	1	0
GH97	S1_16	2	1	1	1	0
GH97	S1_17	1	1	1	1	0
GH97	S1_23	1	2	2	2	0
GH97	S1_28	1	2	2	2	0
GH97	S1_51	1	5	5	5	0
GH97	S1_62	2	1	1	1	0
GH99	S1_11	1	8	8	8	0
GH9	GT19	1	2	2	2	0
GH9	GT2_Glycos_transf_2	1	21	21	21	0
GT10	GT2_Glyco_tranf_2_3	3	1	3	2.33	1.15
GT10	GT2_Glycos_transf_2	1	2	2	2	0
GT10	GT4	2	1	1	1	0
GT11	GT2_Glyco_tranf_2_4	1	1	1	1	0
GT14	GT2_Glyco_tranf_2_2	1	2	2	2	0
GT14	GT2_Glycos_transf_2	5	1	7	3.6	2.61
GT14	GT4	4	3	7	4	2
GT17	GT17	1	3	3	3	0
GT19	GT2_Glyco_tranf_2_3	1	20	20	20	0
GT19	GT2_Glycos_transf_2	6	13	23	17.33	4.08
GT19	GT4	10	10	25	13.9	4.68
GT25	GT2_Glycos_transf_2	9	1	16	10.89	6.95
GT25	GT30	4	2	5	2.75	1.5
GT25	GT4	3	1	12	8.33	6.35
GT25	GT9	6	1	14	7.5	7.12
GT25	GT90	3	17	17	17	0
GT26	GT2_Glycos_transf_2	2	3	11	7	5.66
GT26	GT4	8	1	10	2.5	3.12
GT27	GT2_Glyco_tranf_2_2	1	2	2	2	0
GT27	GT2_Glycos_transf_2	1	1	1	1	0
GT27	GT56	2	3	4	3.5	0.71
GT28	GT2_Glyco_tranf_2_3	2	13	21	17	5.66
GT28	GT2_Glycos_transf_2	4	12	16	13	2
GT28	GT4	2	16	16	16	0
GT28	S1_30	2	14	14	14	0
GT2_Glyco_tranf_2_2	GT2_Glyco_tranf_2_2	9	1	14	5.56	4.59
GT2_Glyco_tranf_2_2	GT2_Glyco_tranf_2_3	21	1	23	9.38	6.92
GT2_Glyco_tranf_2_2	GT2_Glycos_transf_2	36	1	24	5.39	6.08
GT2_Glyco_tranf_2_2	GT32	4	2	23	10.75	8.81
GT2_Glyco_tranf_2_2	GT4	12	1	13	6.17	5.2
GT2_Glyco_tranf_2_2	GT56	2	1	2	1.5	0.71
GT2_Glyco_tranf_2_2	GT8	2	3	8	5.5	3.54
GT2_Glyco_tranf_2_3	GT2_Glyco_tranf_2_3	20	1	23	8.05	7.25
GT2_Glyco_tranf_2_3	GT2_Glyco_tranf_2_4	2	1	1	1	0
GT2_Glyco_tranf_2_3	GT2_Glyco_tranf_2_5	1	1	1	1	0
GT2_Glyco_tranf_2_3	GT2_Glycos_transf_2	54	1	24	5.87	6.77
GT2_Glyco_tranf_2_3	GT30	2	2	7	4.5	3.54
GT2_Glyco_tranf_2_3	GT32	6	1	15	5.5	5.99
GT2_Glyco_tranf_2_3	GT4	58	1	16	4.86	3.79
GT2_Glyco_tranf_2_3	GT8	1	15	15	15	0
GT2_Glyco_tranf_2_3	GT83	1	1	1	1	0
GT2_Glyco_tranf_2_3	GT90	1	8	8	8	0
GT2_Glyco_tranf_2_3	GT99	1	9	9	9	0
GT2_Glyco_tranf_2_3	PL9_2	1	9	9	9	0
GT2_Glyco_tranf_2_3	S1_14	1	16	16	16	0
GT2_Glyco_tranf_2_3	S1_16	1	19	19	19	0
GT2_Glyco_tranf_2_3	S1_17	1	8	8	8	0
GT2_Glyco_tranf_2_3	S1_19	1	10	10	10	0
GT2_Glyco_tranf_2_3	S1_28	1	15	15	15	0
GT2_Glyco_tranf_2_3	S1_30	1	17	17	17	0
GT2_Glyco_tranf_2_3	S1_46	1	2	2	2	0
GT2_Glyco_tranf_2_3	S1_8	1	16	16	16	0
GT2_Glyco_tranf_2_3	S1_9	2	16	16	16	0
GT2_Glyco_tranf_2_4	GT2_Glyco_tranf_2_4	1	1	1	1	0
GT2_Glyco_tranf_2_4	GT2_Glycos_transf_2	1	1	1	1	0
GT2_Glyco_tranf_2_5	GT2_Glyco_tranf_2_5	1	1	1	1	0
GT2_Glyco_tranf_2_5	GT4	4	1	15	4.75	6.85
GT2_Glyco_tranf_2_5	S1_28	1	4	4	4	0
GT2_Glycos_transf_2	GT2_Glycos_transf_2	93	1	25	6	5.54
GT2_Glycos_transf_2	GT30	9	2	14	9.78	5.61
GT2_Glycos_transf_2	GT32	13	1	24	7	7.11
GT2_Glycos_transf_2	GT4	136	1	23	5.99	5.47
GT2_Glycos_transf_2	GT56	2	2	3	2.5	0.71
GT2_Glycos_transf_2	GT8	26	1	16	4.19	3.78
GT2_Glycos_transf_2	GT83	4	1	22	6.25	10.5
GT2_Glycos_transf_2	GT9	27	1	15	4.78	5.8
GT2_Glycos_transf_2	GT90	6	1	2	1.5	0.55
GT2_Glycos_transf_2	GT92	1	1	1	1	0
GT2_Glycos_transf_2	S1_15	3	15	15	15	0
GT2_Glycos_transf_2	S1_16	2	8	20	14	8.49
GT2_Glycos_transf_2	S1_17	4	3	15	6	6
GT2_Glycos_transf_2	S1_19	1	4	4	4	0
GT2_Glycos_transf_2	S1_28	3	4	10	6	3.46
GT2_Glycos_transf_2	S1_30	3	2	18	7.33	9.24
GT2_Glycos_transf_2	S1_9	9	3	18	9.44	6.82
GT30	GT4	3	4	14	10.67	5.77
GT30	GT9	7	1	12	5.86	5.76
GT30	GT90	3	15	15	15	0
GT32	GT32	1	14	14	14	0
GT32	GT4	17	2	16	4.71	3.9
GT35	GT4	10	1	2	1.6	0.52
GT35	GT5	4	1	2	1.25	0.5
GT35	GT51	3	3	3	3	0
GT35	GT8	1	6	6	6	0
GT35	S1_16	1	19	19	19	0
GT35	S1_20	1	18	18	18	0
GT35	S1_22	1	10	10	10	0
GT35	S1_4	1	12	12	12	0
GT3	GT3	3	2	5	3.33	1.53
GT3	GT35	4	1	1	1	0
GT3	GT4	5	1	2	1.8	0.45
GT3	S1_25	2	2	3	2.5	0.71
GT41	GT41	3	1	2	1.33	0.58
GT41	PL7_3	2	5	5	5	0
GT41	PL9_2	1	6	6	6	0
GT41	S1_13	3	14	14	14	0
GT41	S1_23	1	3	3	3	0
GT4	GT4	107	1	21	4.38	4.07
GT4	GT41	1	7	7	7	0
GT4	GT5	9	2	4	3.11	0.6
GT4	GT8	4	1	17	6.25	7.54
GT4	GT83	1	25	25	25	0
GT4	GT9	5	1	13	5.8	6.57
GT4	GT92	2	1	1	1	0
GT4	PL40	9	7	23	16.33	5.24
GT4	PL9_2	1	1	1	1	0
GT4	S1_16	4	14	15	14.5	0.58
GT4	S1_17	4	9	19	14.75	4.65
GT4	S1_19	2	13	13	13	0
GT4	S1_20	1	10	10	10	0
GT4	S1_28	4	1	18	9.25	9.54
GT4	S1_72	1	2	2	2	0
GT4	S1_9	6	4	25	14.33	9.4
GT56	GT56	1	1	1	1	0
GT5	GT9	2	3	3	3	0
GT5	PL9_2	1	16	16	16	0
GT5	S1_16	5	8	12	10.8	1.64
GT5	S1_19	2	9	9	9	0
GT65	GT65	3	2	4	2.67	1.15
GT8	GT8	6	1	5	1.83	1.6
GT90	S1_14	1	24	24	24	0
GT9	GT9	9	1	13	5.56	5.59
GT9	GT90	6	3	16	9.5	7.12
GT9	PL8_1	2	1	1	1	0
PL12_2	PL13	1	1	1	1	0
PL13	PL13	4	1	2	1.25	0.5
PL13	PL39	4	1	3	1.75	0.96
PL13	S1_8	3	2	4	3	1
PL1	PL10_1	1	4	4	4	0
PL22	S1_13	2	18	18	18	0
PL25	PL25	1	1	1	1	0
PL29	PL29	2	1	1	1	0
PL29	PL6_1	1	4	4	4	0
PL35	S1_23	1	3	3	3	0
PL37	PL39	2	3	3	3	0
PL37	S1_8	1	2	2	2	0
PL37	S1_9	1	6	6	6	0
PL38	PL38	51	1	8	2.92	1.8
PL38	PL6_1	7	1	3	2	1
PL38	PL7_3	3	10	10	10	0
PL39	PL39	1	1	1	1	0
PL39	PL40	2	7	8	7.5	0.71
PL39	S1_11	2	2	2	2	0
PL39	S1_8	2	1	5	3	2.83
PL39	S1_9	1	3	3	3	0
PL40	PL40	7	3	11	7.57	3.26
PL40	PL6_1	1	7	7	7	0
PL40	S1_14	3	12	22	16.33	5.13
PL40	S1_17	12	1	10	3.17	3.01
PL40	S1_25	1	1	1	1	0
PL40	S1_7	1	21	21	21	0
PL42	S1_7	3	1	1	1	0
PL6_1	PL6_1	5	1	2	1.2	0.45
PL6_1	PL7_3	3	13	13	13	0
PL6_1	S1_7	1	14	14	14	0
PL7_1	PL7_3	2	21	21	21	0
PL7_3	S1_13	2	19	19	19	0
PL8_1	PL9_2	1	4	4	4	0
PL8_1	S1_11	1	2	2	2	0
PL8_1	S1_15	2	1	1	1	0
PL8_1	S1_23	1	3	3	3	0
PL8_1	S1_28	1	2	2	2	0
PL9_2	S1_17	1	4	4	4	0
PL9_2	S1_4	1	1	1	1	0
S1_11	S1_11	1	1	1	1	0
S1_11	S1_15	2	1	1	1	0
S1_11	S1_16	3	1	2	1.33	0.58
S1_11	S1_17	4	1	2	1.25	0.5
S1_11	S1_19	7	2	12	7	4.12
S1_11	S1_7	1	5	5	5	0
S1_11	S1_72	1	12	12	12	0
S1_11	S1_8	3	5	10	6.67	2.89
S1_12	S1_51	1	1	1	1	0
S1_12	S1_52	1	3	3	3	0
S1_12	S1_N.C.	1	4	4	4	0
S1_13	S1_13	8	1	4	2.5	1.31
S1_14	S1_15	1	1	1	1	0
S1_14	S1_16	2	1	1	1	0
S1_14	S1_17	3	1	16	7.67	7.64
S1_14	S1_24	4	1	4	2.25	1.26
S1_14	S1_25	1	4	4	4	0
S1_14	S1_27	1	3	3	3	0
S1_14	S1_4	3	1	1	1	0
S1_14	S1_50	1	3	3	3	0
S1_14	S1_7	1	3	3	3	0
S1_14	S1_8	1	1	1	1	0
S1_15	S1_16	7	1	5	2.71	1.7
S1_15	S1_17	2	1	1	1	0
S1_15	S1_19	5	1	7	3.6	2.79
S1_15	S1_20	4	1	2	1.5	0.58
S1_15	S1_23	2	1	2	1.5	0.71
S1_15	S1_24	1	1	1	1	0
S1_15	S1_28	3	1	1	1	0
S1_15	S1_30	2	2	2	2	0
S1_15	S1_46	1	2	2	2	0
S1_15	S1_62	3	1	1	1	0
S1_15	S1_72	2	3	13	8	7.07
S1_15	S1_8	10	1	7	2.5	1.96
S1_16	S1_16	10	1	6	3.5	1.51
S1_16	S1_17	1	3	3	3	0
S1_16	S1_19	3	1	3	2	1
S1_16	S1_20	9	1	3	2.11	0.6
S1_16	S1_22	1	9	9	9	0
S1_16	S1_24	2	1	1	1	0
S1_16	S1_25	1	1	1	1	0
S1_16	S1_30	5	2	8	4.4	3.29
S1_16	S1_4	2	2	7	4.5	3.54
S1_16	S1_7	5	1	6	4	2.74
S1_16	S1_72	2	1	1	1	0
S1_16	S1_8	19	1	12	4.42	3.17
S1_16	S1_N.C.	5	1	3	1.4	0.89
S1_17	S1_17	5	1	6	3	2.12
S1_17	S1_19	1	1	1	1	0
S1_17	S1_20	2	2	2	2	0
S1_17	S1_23	1	1	1	1	0
S1_17	S1_24	11	1	10	3.18	2.79
S1_17	S1_25	4	1	6	2.25	2.5
S1_17	S1_28	4	1	2	1.75	0.5
S1_17	S1_30	3	1	1	1	0
S1_17	S1_50	1	9	9	9	0
S1_17	S1_51	2	1	1	1	0
S1_17	S1_72	4	1	3	1.75	0.96
S1_17	S1_8	1	1	1	1	0
S1_19	S1_19	12	1	10	4.58	3.15
S1_19	S1_24	3	2	10	7	4.36
S1_19	S1_28	1	1	1	1	0
S1_19	S1_8	7	1	7	3.71	2.36
S1_20	S1_22	2	3	8	5.5	3.54
S1_20	S1_30	4	3	6	4.5	1.73
S1_20	S1_4	1	6	6	6	0
S1_20	S1_7	1	5	5	5	0
S1_20	S1_8	16	1	12	3.38	3.1
S1_20	S1_N.C.	1	5	5	5	0
S1_22	S1_4	1	2	2	2	0
S1_22	S1_8	1	1	1	1	0
S1_23	S1_28	2	1	2	1.5	0.71
S1_23	S1_62	2	1	1	1	0
S1_24	S1_24	2	1	1	1	0
S1_24	S1_25	5	1	1	1	0
S1_24	S1_28	3	4	4	4	0
S1_24	S1_4	1	1	1	1	0
S1_24	S1_50	1	1	1	1	0
S1_24	S1_51	1	1	1	1	0
S1_24	S1_72	3	2	6	4.33	2.08
S1_25	S1_25	5	1	2	1.2	0.45
S1_25	S1_27	1	1	1	1	0
S1_25	S1_28	3	3	3	3	0
S1_25	S1_72	1	5	5	5	0
S1_27	S1_8	2	6	7	6.5	0.71
S1_30	S1_31	1	1	1	1	0
S1_30	S1_72	1	2	2	2	0
S1_30	S1_8	5	1	4	3	1.41
S1_30	S1_N.C.	1	11	11	11	0
S1_36	S1_51	1	1	1	1	0
S1_36	S1_52	1	3	3	3	0
S1_40	S1_55	1	6	6	6	0
S1_4	S1_4	3	1	11	4.67	5.51
S1_51	S1_52	2	2	2	2	0
S1_51	S1_72	2	7	8	7.5	0.71
S1_51	S1_N.C.	1	5	5	5	0
S1_52	S1_N.C.	1	7	7	7	0
S1_53	S1_N.C.	1	2	2	2	0
S1_62	S1_62	1	1	1	1	0
S1_72	S1_72	2	1	14	7.5	9.19
S1_7	S1_7	1	4	4	4	0
S1_7	S1_8	4	1	15	11.5	7
S1_8	S1_8	10	1	10	3.9	3.84
S1_8	S1_N.C.	1	7	7	7	0

## Sheet: rum max25 gene distance stats
term1	term2	num instances	min	max	mean	stdev
AA3	CE4	1	4	4	4	0
AA4	GH109	1	9	9	9	0
AA4	GH3	2	9	10	9.5	0.71
AA4	GH43	1	10	10	10	0
AA4	GH43_34	1	11	11	11	0
AA4	GH93	1	3	3	3	0
AA4	GT26	1	10	10	10	0
AA4	GT28	1	16	16	16	0
AA4	GT2_Glycos_transf_2	1	10	10	10	0
AA4	S1_7	1	7	7	7	0
AA5	CE1	1	22	22	22	0
AA5	GH2	1	18	18	18	0
AA5	GT2_Glycos_transf_2	1	8	8	8	0
AA5	GT4	1	7	7	7	0
AA5	S1_4	1	6	6	6	0
AA5	S1_8	1	10	10	10	0
AA6	CE4	3	2	18	11.67	8.5
AA6	GH13_31	1	20	20	20	0
AA6	GH38	1	16	16	16	0
AA6	SLH	1	12	12	12	0
AA7	CBM62	2	5	8	6.5	2.12
AA7	CE4	1	4	4	4	0
AA7	GH146	1	24	24	24	0
AA7	GH3	1	10	10	10	0
AA7	GH43_24	1	18	18	18	0
AA7	GT2_Glycos_transf_2	8	4	16	8.75	4.17
AA7	GT32	3	3	3	3	0
AA7	GT4	2	2	15	8.5	9.19
AA7	GT41	1	13	13	13	0
AA7	S1_16	1	9	9	9	0
AA7	S1_4	1	14	14	14	0
CBM11	GH5_25	1	1	1	1	0
CBM11	GT2_Glycos_transf_2	1	3	3	3	0
CBM13	CBM50	1	23	23	23	0
CBM13	CBM61	1	10	10	10	0
CBM13	CE1	2	24	24	24	0
CBM13	CE3	1	4	4	4	0
CBM13	GH115	1	20	20	20	0
CBM13	GH130	1	4	4	4	0
CBM13	GH2	1	22	22	22	0
CBM13	GH25	1	1	1	1	0
CBM13	GH26	1	5	5	5	0
CBM13	GH3	1	13	13	13	0
CBM13	GH43_4	1	9	9	9	0
CBM13	GH94	1	2	2	2	0
CBM13	GT3	1	22	22	22	0
CBM13	GT30	1	6	6	6	0
CBM13	GT35	1	21	21	21	0
CBM13	GT4	2	20	25	22.5	3.54
CBM13	GT41	1	23	23	23	0
CBM13	GT5	1	6	6	6	0
CBM13	PL11_1	2	2	23	12.5	14.85
CBM13	S1_16	1	2	2	2	0
CBM13	S1_2	1	14	14	14	0
CBM13	S1_27	1	6	6	6	0
CBM20	GH29	1	24	24	24	0
CBM20	GH95	1	5	5	5	0
CBM20	PL26	1	5	5	5	0
CBM21	CBM37	1	1	1	1	0
CBM21	GH13_39	1	2	2	2	0
CBM21	GH25	1	10	10	10	0
CBM26	CBM26	3	2	5	3.33	1.53
CBM26	CE1	3	15	19	16.33	2.31
CBM26	GH106	1	15	15	15	0
CBM26	GH115	2	4	6	5	1.41
CBM26	GH125	1	15	15	15	0
CBM26	GH13	23	1	5	2	1.17
CBM26	GH133	2	7	7	7	0
CBM26	GH13_10	2	2	2	2	0
CBM26	GH13_11	1	12	12	12	0
CBM26	GH13_14	1	2	2	2	0
CBM26	GH13_36	1	4	4	4	0
CBM26	GH13_4	1	12	12	12	0
CBM26	GH13_42	5	1	13	6.8	5.59
CBM26	GH13_6	2	2	4	3	1.41
CBM26	GH149	1	11	11	11	0
CBM26	GH16_3	1	7	7	7	0
CBM26	GH2	3	5	10	8.33	2.89
CBM26	GH20	1	11	11	11	0
CBM26	GH23	1	9	9	9	0
CBM26	GH3	2	2	9	5.5	4.95
CBM26	GH31	2	4	5	4.5	0.71
CBM26	GH35	1	14	14	14	0
CBM26	GH36	1	6	6	6	0
CBM26	GH38	1	13	13	13	0
CBM26	GH43_19	1	1	1	1	0
CBM26	GH43_29	1	3	3	3	0
CBM26	GH43_35	1	7	7	7	0
CBM26	GH43_7	1	12	12	12	0
CBM26	GH53	1	2	2	2	0
CBM26	GH5_4	1	3	3	3	0
CBM26	GH5_46	1	8	8	8	0
CBM26	GH67	1	1	1	1	0
CBM26	GH76	1	3	3	3	0
CBM26	GH77	2	18	19	18.5	0.71
CBM26	GH81	1	2	2	2	0
CBM26	GH95	1	13	13	13	0
CBM26	GH97	6	3	8	4.17	2.04
CBM26	GT28	1	4	4	4	0
CBM26	GT2_Glycos_transf_2	9	5	19	12.67	4.69
CBM26	GT4	4	6	9	6.75	1.5
CBM26	S1_16	2	4	14	9	7.07
CBM26	S1_27	5	3	17	8.8	5.81
CBM26	S1_28	1	11	11	11	0
CBM26	S1_7	1	5	5	5	0
CBM26	S1_8	1	14	14	14	0
CBM26	S1_9	1	8	8	8	0
CBM32	CBM32	10	1	17	5.4	5.78
CBM32	CBM62	2	9	13	11	2.83
CBM32	CBM67	1	6	6	6	0
CBM32	CE1	2	1	9	5	5.66
CBM32	CE12	1	1	1	1	0
CBM32	CE4	1	22	22	22	0
CBM32	CE9	1	5	5	5	0
CBM32	GH105	1	1	1	1	0
CBM32	GH106	1	18	18	18	0
CBM32	GH109	1	25	25	25	0
CBM32	GH115	1	2	2	2	0
CBM32	GH128	5	1	9	6	3.16
CBM32	GH130	1	12	12	12	0
CBM32	GH146	2	17	19	18	1.41
CBM32	GH149	8	2	14	7.88	4.88
CBM32	GH16_3	13	2	10	7.31	2.29
CBM32	GH2	1	13	13	13	0
CBM32	GH20	1	19	19	19	0
CBM32	GH25	2	8	10	9	1.41
CBM32	GH26	1	20	20	20	0
CBM32	GH27	2	4	17	10.5	9.19
CBM32	GH28	2	6	8	7	1.41
CBM32	GH29	2	1	7	4	4.24
CBM32	GH3	9	1	17	8.67	4.97
CBM32	GH30_1	4	1	14	7.25	6.24
CBM32	GH31	1	2	2	2	0
CBM32	GH33	1	17	17	17	0
CBM32	GH43_10	1	7	7	7	0
CBM32	GH43_12	1	7	7	7	0
CBM32	GH43_31	1	8	8	8	0
CBM32	GH43_33	1	10	10	10	0
CBM32	GH78	2	16	19	17.5	2.12
CBM32	GH81	9	1	16	5.78	5.67
CBM32	GH85	1	15	15	15	0
CBM32	GH9	1	2	2	2	0
CBM32	GH92	1	2	2	2	0
CBM32	GH95	2	3	5	4	1.41
CBM32	GT2_Glycos_transf_2	5	5	15	8.8	3.96
CBM32	GT4	3	4	22	11.33	9.45
CBM32	GT51	1	6	6	6	0
CBM32	PL35	1	7	7	7	0
CBM32	S1_14	1	23	23	23	0
CBM32	S1_25	1	4	4	4	0
CBM32	S1_27	9	2	24	13	8.8
CBM32	S1_63	1	19	19	19	0
CBM32	S1_7	2	11	18	14.5	4.95
CBM32	S1_8	1	1	1	1	0
CBM32	S1_9	1	7	7	7	0
CBM34	GH13_9	1	2	2	2	0
CBM34	GT35	1	3	3	3	0
CBM34	GT5	1	1	1	1	0
CBM35	CBM50	1	1	1	1	0
CBM35	GH129	1	5	5	5	0
CBM35	GH13_39	2	13	19	16	4.24
CBM35	GH3	1	21	21	21	0
CBM35	GH77	2	2	12	7	7.07
CBM35	GT35	1	20	20	20	0
CBM35	PL1_2	1	7	7	7	0
CBM35	S1_14	1	10	10	10	0
CBM35	S1_22	1	5	5	5	0
CBM37	GH13_4	1	16	16	16	0
CBM37	GH16_3	1	13	13	13	0
CBM37	GH24	1	13	13	13	0
CBM37	GH25	1	2	2	2	0
CBM37	GH33	1	6	6	6	0
CBM37	GH36	1	22	22	22	0
CBM37	GT28	1	6	6	6	0
CBM37	GT2_Glycos_transf_2	1	9	9	9	0
CBM37	S1_7	1	10	10	10	0
CBM38	CE4	1	12	12	12	0
CBM38	GH2	1	7	7	7	0
CBM38	GH28	1	23	23	23	0
CBM38	GH32	4	1	6	3.25	2.63
CBM38	GH65	1	25	25	25	0
CBM4	CE1	4	2	17	12.25	6.95
CBM4	CE6	2	2	5	3.5	2.12
CBM4	GH10	7	1	6	1.71	1.89
CBM4	GH141	2	2	3	2.5	0.71
CBM4	GH16_3	1	1	1	1	0
CBM4	GH2	1	24	24	24	0
CBM4	GH27	1	2	2	2	0
CBM4	GH3	2	15	25	20	7.07
CBM4	GH30_8	2	1	6	3.5	3.54
CBM4	GH31	1	12	12	12	0
CBM4	GH32	1	1	1	1	0
CBM4	GH43_10	1	1	1	1	0
CBM4	GH43_16	2	5	7	6	1.41
CBM4	GH43_2	1	19	19	19	0
CBM4	GH43_29	1	3	3	3	0
CBM4	GH43_7	1	20	20	20	0
CBM4	GH67	1	22	22	22	0
CBM4	GH78	1	12	12	12	0
CBM4	GH97	1	9	9	9	0
CBM4	GT2_Glycos_transf_2	1	22	22	22	0
CBM4	S1_24	1	1	1	1	0
CBM4	S1_27	7	4	15	7	3.65
CBM4	S1_7	1	18	18	18	0
CBM50	CBM50	1	12	12	12	0
CBM50	CE1	4	5	24	12.75	8.66
CBM50	CE11	1	1	1	1	0
CBM50	CE4	2	14	16	15	1.41
CBM50	CE8	2	3	15	9	8.49
CBM50	GH105	4	1	25	11.5	11.09
CBM50	GH106	2	8	18	13	7.07
CBM50	GH129	1	6	6	6	0
CBM50	GH13	2	17	19	18	1.41
CBM50	GH133	1	18	18	18	0
CBM50	GH13_14	5	1	2	1.2	0.45
CBM50	GH13_20	1	17	17	17	0
CBM50	GH13_38	2	8	14	11	4.24
CBM50	GH13_39	1	12	12	12	0
CBM50	GH13_8	3	5	17	11.33	6.03
CBM50	GH16	1	3	3	3	0
CBM50	GH16_3	1	18	18	18	0
CBM50	GH2	1	6	6	6	0
CBM50	GH20	2	5	7	6	1.41
CBM50	GH23	2	1	17	9	11.31
CBM50	GH25	2	8	15	11.5	4.95
CBM50	GH28	4	2	22	12	8.33
CBM50	GH3	1	6	6	6	0
CBM50	GH43_19	1	2	2	2	0
CBM50	GH43_34	1	11	11	11	0
CBM50	GH57	1	20	20	20	0
CBM50	GH73	1	19	19	19	0
CBM50	GH92	3	6	16	10.67	5.03
CBM50	GT28	1	23	23	23	0
CBM50	GT2_Glycos_transf_2	7	5	19	13.86	5.73
CBM50	GT3	2	1	21	11	14.14
CBM50	GT30	1	5	5	5	0
CBM50	GT35	1	2	2	2	0
CBM50	GT4	5	8	21	15.2	6.61
CBM50	GT41	3	2	14	9.67	6.66
CBM50	GT9	3	4	7	5	1.73
CBM50	GT90	1	6	6	6	0
CBM50	GT92	1	9	9	9	0
CBM50	GT94	3	1	11	4.33	5.77
CBM50	PL1_2	2	6	18	12	8.49
CBM50	PL22	1	13	13	13	0
CBM50	S1_11	2	15	21	18	4.24
CBM50	S1_16	6	1	12	5.67	5.2
CBM50	S1_2	3	3	14	6.67	6.35
CBM50	S1_25	1	24	24	24	0
CBM50	S1_48	1	1	1	1	0
CBM50	S1_65	1	3	3	3	0
CBM50	S1_7	2	2	2	2	0
CBM50	S3	1	2	2	2	0
CBM51	CBM61	1	14	14	14	0
CBM51	CE1	3	1	17	11.33	8.96
CBM51	GH10	1	24	24	24	0
CBM51	GH105	1	4	4	4	0
CBM51	GH133	2	4	4	4	0
CBM51	GH13_11	1	10	10	10	0
CBM51	GH13_20	1	8	8	8	0
CBM51	GH27	1	1	1	1	0
CBM51	GH35	1	4	4	4	0
CBM51	GH53	1	3	3	3	0
CBM51	GH57	2	6	6	6	0
CBM51	GH8	1	8	8	8	0
CBM51	GH95	1	16	16	16	0
CBM51	GH97	1	17	17	17	0
CBM51	GT28	1	1	1	1	0
CBM51	GT2_Glycos_transf_2	1	23	23	23	0
CBM51	GT4	2	5	5	5	0
CBM51	GT41	3	5	19	13.67	7.57
CBM51	GT5	1	8	8	8	0
CBM51	PL26	1	2	2	2	0
CBM51	PL33_1	1	12	12	12	0
CBM51	S1_14	1	13	13	13	0
CBM51	S1_8	1	23	23	23	0
CBM56	GH133	2	15	20	17.5	3.54
CBM56	GH2	1	23	23	23	0
CBM56	GH29	1	1	1	1	0
CBM56	GH3	2	5	8	6.5	2.12
CBM56	GH57	2	12	18	15	4.24
CBM56	GH97	2	6	7	6.5	0.71
CBM56	GT2_Glycos_transf_2	2	16	17	16.5	0.71
CBM56	GT3	2	11	17	14	4.24
CBM56	GT5	2	14	19	16.5	3.54
CBM56	PL1_2	1	2	2	2	0
CBM56	S1_7	1	16	16	16	0
CBM61	CE1	1	8	8	8	0
CBM61	CE12	1	12	12	12	0
CBM61	CE4	1	1	1	1	0
CBM61	CE6	3	2	2	2	0
CBM61	CE8	1	2	2	2	0
CBM61	GH105	2	10	10	10	0
CBM61	GH109	2	6	7	6.5	0.71
CBM61	GH125	1	17	17	17	0
CBM61	GH128	1	1	1	1	0
CBM61	GH130	1	16	16	16	0
CBM61	GH133	1	21	21	21	0
CBM61	GH13_14	1	3	3	3	0
CBM61	GH163	1	25	25	25	0
CBM61	GH16_3	1	19	19	19	0
CBM61	GH2	6	1	18	6.83	7.7
CBM61	GH23	1	2	2	2	0
CBM61	GH25	1	9	9	9	0
CBM61	GH26	1	6	6	6	0
CBM61	GH28	1	1	1	1	0
CBM61	GH29	3	9	16	13.33	3.79
CBM61	GH3	7	2	15	5.29	4.5
CBM61	GH31	3	2	2	2	0
CBM61	GH35	1	8	8	8	0
CBM61	GH36	1	5	5	5	0
CBM61	GH43_1	2	7	17	12	7.07
CBM61	GH43_10	2	2	3	2.5	0.71
CBM61	GH43_16	1	18	18	18	0
CBM61	GH43_17	1	9	9	9	0
CBM61	GH43_19	2	10	23	16.5	9.19
CBM61	GH43_24	3	10	11	10.33	0.58
CBM61	GH43_29	1	7	7	7	0
CBM61	GH43_4	1	1	1	1	0
CBM61	GH43_5	2	1	9	5	5.66
CBM61	GH51	4	1	16	7	6.68
CBM61	GH53	2	1	1	1	0
CBM61	GH57	1	19	19	19	0
CBM61	GH5_21	3	3	3	3	0
CBM61	GH67	1	16	16	16	0
CBM61	GH73	1	11	11	11	0
CBM61	GH92	1	18	18	18	0
CBM61	GH93	1	4	4	4	0
CBM61	GH95	2	3	6	4.5	2.12
CBM61	GH97	3	1	1	1	0
CBM61	GT23	1	5	5	5	0
CBM61	GT2_Glyco_tranf_2_3	1	23	23	23	0
CBM61	GT2_Glycos_transf_2	16	1	25	6.44	7.3
CBM61	GT4	2	3	20	11.5	12.02
CBM61	GT41	4	10	24	18.5	6.81
CBM61	GT51	3	8	15	10.33	4.04
CBM61	PL11_1	1	19	19	19	0
CBM61	PL11_2	1	13	13	13	0
CBM61	PL26	2	2	12	7	7.07
CBM61	S1_14	2	7	16	11.5	6.36
CBM61	S1_16	2	2	14	8	8.49
CBM61	S1_19	1	2	2	2	0
CBM61	S1_2	1	1	1	1	0
CBM61	S1_27	8	1	17	5.25	4.98
CBM61	S1_7	1	5	5	5	0
CBM61	S1_8	5	4	16	6.4	5.37
CBM62	CBM62	2	1	4	2.5	2.12
CBM62	CBM67	1	8	8	8	0
CBM62	CE1	1	13	13	13	0
CBM62	CE11	2	5	6	5.5	0.71
CBM62	CE15	1	6	6	6	0
CBM62	CE4	1	1	1	1	0
CBM62	CE9	1	5	5	5	0
CBM62	GH106	1	2	2	2	0
CBM62	GH109	1	21	21	21	0
CBM62	GH115	2	18	18	18	0
CBM62	GH13	1	9	9	9	0
CBM62	GH13_38	1	24	24	24	0
CBM62	GH2	4	1	23	7.75	10.31
CBM62	GH28	1	5	5	5	0
CBM62	GH3	3	5	12	9	3.61
CBM62	GH30_3	2	1	14	7.5	9.19
CBM62	GH31	2	8	14	11	4.24
CBM62	GH43_2	2	1	19	10	12.73
CBM62	GH43_28	1	14	14	14	0
CBM62	GH43_29	2	19	24	21.5	3.54
CBM62	GH43_3	1	7	7	7	0
CBM62	GH43_33	3	1	3	1.67	1.15
CBM62	GH43_35	2	12	25	18.5	9.19
CBM62	GH43_7	1	18	18	18	0
CBM62	GH54	1	15	15	15	0
CBM62	GH67	1	21	21	21	0
CBM62	GH92	2	19	23	21	2.83
CBM62	GH95	2	9	17	13	5.66
CBM62	GH97	2	8	21	14.5	9.19
CBM62	GT14	1	3	3	3	0
CBM62	GT2_Glycos_transf_2	8	3	20	10.62	4.96
CBM62	GT32	2	2	5	3.5	2.12
CBM62	GT4	1	10	10	10	0
CBM62	GT41	1	1	1	1	0
CBM62	GT5	1	20	20	20	0
CBM62	GT9	1	24	24	24	0
CBM62	PL1	1	13	13	13	0
CBM62	PL1_2	1	17	17	17	0
CBM62	S1_11	1	2	2	2	0
CBM62	S1_22	1	9	9	9	0
CBM62	S1_27	3	17	20	18.33	1.53
CBM62	S1_7	1	20	20	20	0
CBM62	S1_9	1	2	2	2	0
CBM66	CE1	1	11	11	11	0
CBM66	GH133	1	9	9	9	0
CBM66	GH57	1	6	6	6	0
CBM66	GT4	2	7	24	15.5	12.02
CBM66	GT51	1	1	1	1	0
CBM66	S1_14	1	6	6	6	0
CBM66	S1_30	1	15	15	15	0
CBM66	S1_7	1	19	19	19	0
CBM67	CE1	3	13	16	14.33	1.53
CBM67	CE15	1	21	21	21	0
CBM67	CE6	1	20	20	20	0
CBM67	GH2	4	1	22	11	9.35
CBM67	GH3	3	5	15	8.67	5.51
CBM67	GH30_8	1	24	24	24	0
CBM67	GH35	1	16	16	16	0
CBM67	GH43_1	1	7	7	7	0
CBM67	GH43_10	1	24	24	24	0
CBM67	GH43_16	1	25	25	25	0
CBM67	GH43_2	2	11	11	11	0
CBM67	GH43_29	1	16	16	16	0
CBM67	GH43_31	1	14	14	14	0
CBM67	GH43_35	1	23	23	23	0
CBM67	GH43_7	2	10	10	10	0
CBM67	GH67	2	8	12	10	2.83
CBM67	GH95	5	1	9	3	3.46
CBM67	GH97	1	13	13	13	0
CBM67	GT41	2	9	15	12	4.24
CBM67	PL22	1	13	13	13	0
CBM67	S1_14	1	22	22	22	0
CBM67	S1_16	1	18	18	18	0
CBM67	S1_27	1	23	23	23	0
CBM67	S1_7	3	8	12	10.67	2.31
CBM67	S3	1	18	18	18	0
CBM6	CE1	1	2	2	2	0
CBM6	CE4	1	12	12	12	0
CBM6	CE6	1	1	1	1	0
CBM6	GH10	2	1	3	2	1.41
CBM6	GH30_8	1	1	1	1	0
CBM6	GH31	1	3	3	3	0
CBM6	GH43_10	1	1	1	1	0
CBM6	GH43_16	1	2	2	2	0
CBM6	GH43_29	1	1	1	1	0
CBM6	GH8	1	11	11	11	0
CBM6	GH95	1	2	2	2	0
CBM6	S1_24	2	2	3	2.5	0.71
CBM74	GH13	1	9	9	9	0
CBM74	GH13_19	1	2	2	2	0
CBM74	GT28	1	2	2	2	0
CBM77	GT28	1	22	22	22	0
CBM77	S1_30	1	3	3	3	0
CBM9	CE1	1	23	23	23	0
CBM9	GH125	2	2	10	6	5.66
CBM9	GH130	2	4	15	9.5	7.78
CBM9	GH2	1	19	19	19	0
CBM9	GH29	2	13	18	15.5	3.54
CBM9	GH33	1	17	17	17	0
CBM9	GH92	7	1	14	4.71	4.99
CBM9	GT19	1	15	15	15	0
CBM9	GT4	1	11	11	11	0
CBM9	GT83	1	11	11	11	0
CBM9	S1_11	2	4	20	12	11.31
CBM9	S1_27	2	1	7	4	4.24
CE11	CE2	1	9	9	9	0
CE11	CE3	1	21	21	21	0
CE11	CE9	1	25	25	25	0
CE11	GH105	2	17	17	17	0
CE11	GH106	1	25	25	25	0
CE11	GH109	2	7	18	12.5	7.78
CE11	GH115	1	7	7	7	0
CE11	GH128	2	2	6	4	2.83
CE11	GH13	1	4	4	4	0
CE11	GH13_29	1	22	22	22	0
CE11	GH13_38	1	22	22	22	0
CE11	GH13_6	1	22	22	22	0
CE11	GH13_8	3	9	9	9	0
CE11	GH146	1	22	22	22	0
CE11	GH2	6	4	22	13.33	5.89
CE11	GH20	1	23	23	23	0
CE11	GH23	3	5	18	9.67	7.23
CE11	GH25	9	4	20	9	6.36
CE11	GH26	1	21	21	21	0
CE11	GH28	2	6	13	9.5	4.95
CE11	GH29	2	16	18	17	1.41
CE11	GH3	4	5	11	9.25	2.87
CE11	GH30_3	1	9	9	9	0
CE11	GH30_8	1	22	22	22	0
CE11	GH31	3	2	18	9	8.19
CE11	GH32	2	2	20	11	12.73
CE11	GH36	1	22	22	22	0
CE11	GH43_16	2	6	23	14.5	12.02
CE11	GH43_19	6	3	6	4.5	1.05
CE11	GH43_28	1	6	6	6	0
CE11	GH43_7	1	9	9	9	0
CE11	GH51	1	25	25	25	0
CE11	GH53	1	5	5	5	0
CE11	GH74	1	19	19	19	0
CE11	GH78	1	23	23	23	0
CE11	GH92	1	5	5	5	0
CE11	GH94	1	19	19	19	0
CE11	GT111	1	13	13	13	0
CE11	GT19	8	4	5	4.12	0.35
CE11	GT28	1	8	8	8	0
CE11	GT2_Glyco_tranf_2_3	1	3	3	3	0
CE11	GT2_Glyco_tranf_2_5	1	23	23	23	0
CE11	GT2_Glycos_transf_2	7	2	21	11.57	6.24
CE11	GT3	3	15	23	18.33	4.16
CE11	GT30	2	6	6	6	0
CE11	GT35	1	16	16	16	0
CE11	GT4	7	1	23	7.57	10.21
CE11	GT41	3	14	23	17.33	4.93
CE11	GT5	1	16	16	16	0
CE11	GT51	19	3	5	3.47	0.7
CE11	GT9	4	7	11	8	2
CE11	PL1	1	5	5	5	0
CE11	PL11_1	2	11	16	13.5	3.54
CE11	PL1_2	1	22	22	22	0
CE11	PL22	5	11	13	12.4	0.89
CE11	PL4_4	1	7	7	7	0
CE11	S1_11	3	11	16	14.33	2.89
CE11	S1_16	2	6	8	7	1.41
CE11	S1_22	1	15	15	15	0
CE11	S1_27	6	6	12	9.17	2.4
CE11	S1_4	1	11	11	11	0
CE11	S1_7	5	7	14	11	3.24
CE11	S1_8	1	5	5	5	0
CE11	S3	2	5	13	9	5.66
CE12	CE12	11	1	15	5.18	6
CE12	CE2	1	2	2	2	0
CE12	CE4	4	1	24	11	9.56
CE12	CE6	1	8	8	8	0
CE12	CE7	3	3	18	8.33	8.39
CE12	CE8	7	1	10	3.71	4.31
CE12	GH10	1	3	3	3	0
CE12	GH105	18	1	21	5.89	5.81
CE12	GH106	5	1	22	7.6	8.71
CE12	GH109	1	11	11	11	0
CE12	GH112	1	9	9	9	0
CE12	GH115	2	1	5	3	2.83
CE12	GH133	1	8	8	8	0
CE12	GH136	3	4	19	9.33	8.39
CE12	GH139	1	17	17	17	0
CE12	GH13_14	2	9	9	9	0
CE12	GH13_20	1	7	7	7	0
CE12	GH13_39	1	15	15	15	0
CE12	GH13_8	1	10	10	10	0
CE12	GH140	1	13	13	13	0
CE12	GH146	2	7	7	7	0
CE12	GH154	1	4	4	4	0
CE12	GH163	2	14	19	16.5	3.54
CE12	GH2	22	1	13	4.86	4.41
CE12	GH23	2	6	22	14	11.31
CE12	GH27	2	6	13	9.5	4.95
CE12	GH28	16	1	25	5.38	6.04
CE12	GH29	1	2	2	2	0
CE12	GH3	4	1	13	5.25	5.68
CE12	GH30_8	3	9	16	11.67	3.79
CE12	GH31	2	7	16	11.5	6.36
CE12	GH32	1	21	21	21	0
CE12	GH35	6	1	4	2.67	1.21
CE12	GH36	3	5	20	10.33	8.39
CE12	GH37	1	8	8	8	0
CE12	GH42	1	16	16	16	0
CE12	GH43_10	3	6	10	7.33	2.31
CE12	GH43_12	1	9	9	9	0
CE12	GH43_17	1	23	23	23	0
CE12	GH43_24	1	9	9	9	0
CE12	GH43_29	1	4	4	4	0
CE12	GH51	5	3	24	10.6	8.05
CE12	GH57	1	10	10	10	0
CE12	GH5_21	1	15	15	15	0
CE12	GH5_38	1	5	5	5	0
CE12	GH73	2	10	11	10.5	0.71
CE12	GH78	1	17	17	17	0
CE12	GH9	1	6	6	6	0
CE12	GH95	2	4	8	6	2.83
CE12	GT2_Glyco_tranf_2_3	1	16	16	16	0
CE12	GT2_Glycos_transf_2	14	1	25	12.43	7.64
CE12	GT3	1	14	14	14	0
CE12	GT30	3	6	14	11	4.36
CE12	GT35	2	15	19	17	2.83
CE12	GT4	11	3	20	11.91	5.74
CE12	GT41	6	1	22	13	8.27
CE12	GT51	2	3	24	13.5	14.85
CE12	GT9	1	21	21	21	0
CE12	PL1	5	2	9	5.6	3.29
CE12	PL10_1	1	5	5	5	0
CE12	PL11	3	1	6	3	2.65
CE12	PL11_1	20	1	23	6.5	6.5
CE12	PL1_2	5	2	11	7	3.24
CE12	PL22	1	11	11	11	0
CE12	PL26	2	3	11	7	5.66
CE12	PL9	1	22	22	22	0
CE12	PL9_1	4	6	20	10.25	6.55
CE12	S1_11	1	3	3	3	0
CE12	S1_14	6	3	10	6	2.9
CE12	S1_16	4	2	22	14.75	9
CE12	S1_2	1	13	13	13	0
CE12	S1_20	1	1	1	1	0
CE12	S1_22	3	4	19	13.67	8.39
CE12	S1_27	22	1	25	8.05	6.78
CE12	S1_28	1	14	14	14	0
CE12	S1_7	6	4	19	9.33	5.65
CE12	S1_8	1	12	12	12	0
CE12	S3	1	18	18	18	0
CE14	CE14	1	1	1	1	0
CE14	CE7	1	1	1	1	0
CE14	GH13_6	1	1	1	1	0
CE14	GH2	1	5	5	5	0
CE14	GH5_46	1	23	23	23	0
CE14	GH65	1	9	9	9	0
CE14	GH78	1	11	11	11	0
CE14	GT26	1	3	3	3	0
CE14	GT2_Glycos_transf_2	3	1	8	3.67	3.79
CE14	GT4	9	1	21	10.44	7.49
CE14	S1_11	1	24	24	24	0
CE14	S1_16	1	10	10	10	0
CE14	S1_7	1	14	14	14	0
CE15	CE6	1	1	1	1	0
CE15	CE7	1	13	13	13	0
CE15	GH105	1	7	7	7	0
CE15	GH106	2	11	19	15	5.66
CE15	GH109	4	2	22	10.25	8.66
CE15	GH115	2	2	4	3	1.41
CE15	GH127	1	15	15	15	0
CE15	GH13_28	1	23	23	23	0
CE15	GH163	1	4	4	4	0
CE15	GH16_3	1	8	8	8	0
CE15	GH18	1	13	13	13	0
CE15	GH2	5	2	13	6.6	4.22
CE15	GH20	1	20	20	20	0
CE15	GH23	1	6	6	6	0
CE15	GH24	1	11	11	11	0
CE15	GH25	4	5	15	7.5	5
CE15	GH27	1	7	7	7	0
CE15	GH28	8	1	16	5.38	5.26
CE15	GH3	6	1	20	8	7.92
CE15	GH31	4	1	21	8.75	9.32
CE15	GH32	1	10	10	10	0
CE15	GH36	1	6	6	6	0
CE15	GH43	2	1	5	3	2.83
CE15	GH43_1	1	13	13	13	0
CE15	GH43_10	2	3	6	4.5	2.12
CE15	GH43_2	5	3	10	6	2.55
CE15	GH43_28	1	8	8	8	0
CE15	GH43_29	3	3	5	4	1
CE15	GH43_35	1	2	2	2	0
CE15	GH43_7	2	5	11	8	4.24
CE15	GH50	1	6	6	6	0
CE15	GH51	2	3	14	8.5	7.78
CE15	GH53	1	14	14	14	0
CE15	GH54	1	9	9	9	0
CE15	GH5_21	1	4	4	4	0
CE15	GH63	1	16	16	16	0
CE15	GH73	1	9	9	9	0
CE15	GH76	1	8	8	8	0
CE15	GH78	3	7	10	8.67	1.53
CE15	GH9	3	3	10	6	3.61
CE15	GH92	5	1	11	8	4
CE15	GH95	6	1	20	9.17	8.28
CE15	GH97	3	5	10	7.67	2.52
CE15	GH98	1	4	4	4	0
CE15	GH99	1	6	6	6	0
CE15	GT2_Glyco_tranf_2_3	1	12	12	12	0
CE15	GT2_Glycos_transf_2	1	8	8	8	0
CE15	GT35	1	14	14	14	0
CE15	GT4	1	9	9	9	0
CE15	GT5	2	9	9	9	0
CE15	PL10_1	1	17	17	17	0
CE15	PL9_1	1	24	24	24	0
CE15	S1_11	2	13	18	15.5	3.54
CE15	S1_14	4	1	22	10	10.68
CE15	S1_16	2	9	11	10	1.41
CE15	S1_20	3	13	19	15.67	3.06
CE15	S1_22	1	16	16	16	0
CE15	S1_25	2	3	10	6.5	4.95
CE15	S1_27	14	1	10	3.93	2.59
CE15	S1_5	1	22	22	22	0
CE15	S1_59	1	4	4	4	0
CE15	S1_7	8	1	14	5.88	4.67
CE15	S1_9	1	2	2	2	0
CE17	CE4	1	23	23	23	0
CE17	GH10	1	1	1	1	0
CE17	GH106	1	1	1	1	0
CE17	GH115	1	1	1	1	0
CE17	GH130	1	1	1	1	0
CE17	GH43_35	1	2	2	2	0
CE17	S1_8	1	2	2	2	0
CE1	CE1	76	1	15	4.47	3.58
CE1	CE11	1	6	6	6	0
CE1	CE12	4	2	18	7	7.44
CE1	CE15	5	2	13	7.4	5.03
CE1	CE2	3	2	18	8	8.72
CE1	CE3	3	10	16	12.33	3.21
CE1	CE4	6	2	10	6	2.83
CE1	CE6	18	1	19	6.39	6
CE1	CE7	5	1	18	9.2	7.36
CE1	CE8	4	2	21	12.25	9.67
CE1	CE9	6	1	24	10.33	9.29
CE1	GH10	16	1	24	12.38	7.6
CE1	GH105	3	6	20	12.33	7.09
CE1	GH106	4	1	23	9.25	9.54
CE1	GH109	12	7	22	13.25	4.43
CE1	GH115	22	1	18	5.32	5.07
CE1	GH125	3	4	25	14.67	10.5
CE1	GH127	3	3	9	5.33	3.21
CE1	GH13	13	1	21	10.46	7.43
CE1	GH130	3	13	24	19	5.57
CE1	GH133	5	2	22	10.4	8.53
CE1	GH137	1	2	2	2	0
CE1	GH138	1	3	3	3	0
CE1	GH139	1	6	6	6	0
CE1	GH13_14	3	6	11	8.67	2.52
CE1	GH13_21	2	6	6	6	0
CE1	GH13_29	3	1	2	1.33	0.58
CE1	GH13_31	5	4	8	6	1.58
CE1	GH13_38	4	13	19	15.5	2.65
CE1	GH13_4	1	5	5	5	0
CE1	GH13_8	2	8	19	13.5	7.78
CE1	GH141	2	5	13	9	5.66
CE1	GH143	1	4	4	4	0
CE1	GH146	9	1	25	10.44	9.45
CE1	GH16	1	1	1	1	0
CE1	GH163	7	7	16	10.57	3.31
CE1	GH16_21	1	7	7	7	0
CE1	GH16_3	1	12	12	12	0
CE1	GH18	3	8	23	17	7.94
CE1	GH2	38	1	25	6.82	6.16
CE1	GH20	3	8	20	13.33	6.11
CE1	GH23	6	13	23	18.67	4.32
CE1	GH25	11	2	22	14.64	6.87
CE1	GH26	7	4	25	13	9.31
CE1	GH27	2	4	19	11.5	10.61
CE1	GH28	9	1	19	11.56	7.02
CE1	GH29	7	2	24	11.14	7.56
CE1	GH3	127	1	25	5.9	5.81
CE1	GH30_3	1	1	1	1	0
CE1	GH30_8	4	3	11	8	3.56
CE1	GH31	29	1	24	8.59	7.09
CE1	GH32	5	1	17	8.4	6.54
CE1	GH33	5	1	23	10.8	9.76
CE1	GH35	7	2	16	8.43	4.65
CE1	GH36	3	4	8	6	2
CE1	GH38	2	9	11	10	1.41
CE1	GH43_1	7	2	23	12	9.8
CE1	GH43_10	29	1	19	3.83	4.35
CE1	GH43_12	2	10	16	13	4.24
CE1	GH43_16	6	1	12	6.67	4.59
CE1	GH43_17	3	1	7	3.33	3.21
CE1	GH43_19	4	11	24	16.75	5.62
CE1	GH43_2	9	1	5	2.67	1.66
CE1	GH43_24	2	2	3	2.5	0.71
CE1	GH43_26	1	10	10	10	0
CE1	GH43_28	3	1	19	10.33	9.02
CE1	GH43_29	17	1	4	2.12	1.11
CE1	GH43_34	1	17	17	17	0
CE1	GH43_35	19	1	10	3.79	2.99
CE1	GH43_5	1	11	11	11	0
CE1	GH43_7	15	2	7	3.67	1.72
CE1	GH5	2	2	23	12.5	14.85
CE1	GH51	14	1	24	9.71	8.43
CE1	GH53	7	1	16	11.29	5.22
CE1	GH55	1	25	25	25	0
CE1	GH57	5	5	20	10.4	6.19
CE1	GH59	2	1	7	4	4.24
CE1	GH5_21	9	1	13	4.22	4.84
CE1	GH5_26	1	21	21	21	0
CE1	GH5_37	1	11	11	11	0
CE1	GH5_38	1	7	7	7	0
CE1	GH5_4	4	1	22	13.5	9.11
CE1	GH5_7	1	17	17	17	0
CE1	GH66	2	11	16	13.5	3.54
CE1	GH67	9	5	21	11.78	6.3
CE1	GH73	14	3	18	10.07	5.18
CE1	GH76	3	4	16	8.33	6.66
CE1	GH77	4	5	13	8.5	3.32
CE1	GH78	5	2	10	6.2	3.03
CE1	GH8	6	1	8	3	2.9
CE1	GH89	3	14	21	17	3.61
CE1	GH9	15	1	25	7.4	6.78
CE1	GH92	10	1	24	9	7.21
CE1	GH94	4	8	21	13	5.94
CE1	GH95	22	1	18	6.09	5.08
CE1	GH97	27	2	24	9.44	6.3
CE1	GH98	4	3	11	5.5	3.79
CE1	GT10	1	12	12	12	0
CE1	GT11	1	2	2	2	0
CE1	GT111	1	1	1	1	0
CE1	GT14	1	9	9	9	0
CE1	GT19	4	4	15	8.5	4.65
CE1	GT26	4	12	18	15.5	3
CE1	GT27	2	4	18	11	9.9
CE1	GT28	1	16	16	16	0
CE1	GT2_Glyco_tranf_2_3	6	6	19	12.5	4.59
CE1	GT2_Glycos_transf_2	68	1	25	12.31	7.26
CE1	GT3	3	3	23	14	10.15
CE1	GT30	2	9	13	11	2.83
CE1	GT32	2	14	20	17	4.24
CE1	GT35	4	12	22	17.75	4.19
CE1	GT4	49	1	25	11.02	6.98
CE1	GT41	19	2	24	10.63	5.88
CE1	GT5	9	1	24	13.33	9.45
CE1	GT51	7	6	23	14.29	5.47
CE1	GT83	2	5	14	9.5	6.36
CE1	GT9	10	6	16	9.1	3.48
CE1	PL1	1	4	4	4	0
CE1	PL10_1	2	8	8	8	0
CE1	PL11	2	16	20	18	2.83
CE1	PL11_1	7	9	25	15.57	5.56
CE1	PL11_2	1	23	23	23	0
CE1	PL12_3	1	5	5	5	0
CE1	PL1_2	5	4	8	6.4	1.67
CE1	PL22	2	2	5	3.5	2.12
CE1	PL26	1	21	21	21	0
CE1	PL8	1	15	15	15	0
CE1	PL9_1	1	12	12	12	0
CE1	S1_11	1	6	6	6	0
CE1	S1_14	7	1	7	2.57	2.3
CE1	S1_16	11	1	22	10	8.47
CE1	S1_17	1	25	25	25	0
CE1	S1_2	5	4	10	5.8	2.68
CE1	S1_20	1	8	8	8	0
CE1	S1_22	4	2	7	4.5	2.38
CE1	S1_24	1	5	5	5	0
CE1	S1_25	5	1	17	5.4	6.8
CE1	S1_27	68	1	25	8.38	6.13
CE1	S1_28	1	4	4	4	0
CE1	S1_30	3	16	23	18.67	3.79
CE1	S1_32	1	8	8	8	0
CE1	S1_4	2	10	16	13	4.24
CE1	S1_5	1	15	15	15	0
CE1	S1_63	7	10	18	14.14	3.44
CE1	S1_65	2	1	5	3	2.83
CE1	S1_7	49	1	24	8.41	7.39
CE1	S1_71	3	16	20	17.33	2.31
CE1	S1_8	7	2	22	13.86	7.73
CE1	S1_9	5	2	25	11.4	8.91
CE1	S3	3	4	5	4.67	0.58
CE1	S4	2	5	25	15	14.14
CE1	SLH	1	2	2	2	0
CE1	cohesin	1	23	23	23	0
CE2	CE2	2	1	16	8.5	10.61
CE2	CE8	1	3	3	3	0
CE2	GH1	1	18	18	18	0
CE2	GH130	3	4	12	9	4.36
CE2	GH139	1	19	19	19	0
CE2	GH146	2	14	15	14.5	0.71
CE2	GH163	1	2	2	2	0
CE2	GH2	3	13	22	18.67	4.93
CE2	GH23	1	15	15	15	0
CE2	GH25	1	22	22	22	0
CE2	GH31	1	25	25	25	0
CE2	GH35	1	9	9	9	0
CE2	GH36	1	1	1	1	0
CE2	GH37	1	6	6	6	0
CE2	GH43_1	1	2	2	2	0
CE2	GH43_12	3	2	6	3.33	2.31
CE2	GH5	2	10	12	11	1.41
CE2	GH51	4	1	1	1	0
CE2	GH53	1	3	3	3	0
CE2	GH5_4	1	1	1	1	0
CE2	GH78	3	4	6	5	1
CE2	GH89	4	1	3	1.75	0.96
CE2	GH95	1	6	6	6	0
CE2	GH97	8	1	16	4.75	4.71
CE2	GT108	2	5	11	8	4.24
CE2	GT27	1	22	22	22	0
CE2	GT2_Glycos_transf_2	5	4	17	12	5.15
CE2	GT30	1	16	16	16	0
CE2	GT41	1	17	17	17	0
CE2	GT51	2	6	6	6	0
CE2	PL1	1	2	2	2	0
CE2	S1_11	1	3	3	3	0
CE2	S1_16	1	13	13	13	0
CE2	S1_22	3	7	9	8	1
CE2	S1_27	3	17	23	19.67	3.06
CE2	S1_6	2	4	20	12	11.31
CE2	S1_7	3	2	5	3.33	1.53
CE2	S1_9	3	7	9	8	1
CE2	S3	1	9	9	9	0
CE2	S4	1	7	7	7	0
CE3	CE8	1	23	23	23	0
CE3	GH109	2	2	4	3	1.41
CE3	GH13	1	9	9	9	0
CE3	GH13_36	1	16	16	16	0
CE3	GH163	1	21	21	21	0
CE3	GH2	2	1	14	7.5	9.19
CE3	GH20	2	18	20	19	1.41
CE3	GH23	1	5	5	5	0
CE3	GH25	2	7	22	14.5	10.61
CE3	GH3	3	6	8	7	1
CE3	GH33	1	1	1	1	0
CE3	GH43_4	1	11	11	11	0
CE3	GH78	1	2	2	2	0
CE3	GH95	1	1	1	1	0
CE3	GT11	1	14	14	14	0
CE3	GT2_Glycos_transf_2	6	1	23	10.5	9.83
CE3	GT32	2	9	11	10	1.41
CE3	GT4	1	1	1	1	0
CE3	GT5	1	16	16	16	0
CE3	GT51	1	14	14	14	0
CE3	GT83	1	11	11	11	0
CE3	GT90	1	8	8	8	0
CE3	PL1	1	24	24	24	0
CE3	PL1_2	1	16	16	16	0
CE3	S1_11	1	2	2	2	0
CE3	S1_14	2	2	6	4	2.83
CE3	S1_18	1	13	13	13	0
CE3	S1_2	1	4	4	4	0
CE3	S1_27	3	6	22	16.33	8.96
CE3	S1_7	1	12	12	12	0
CE3	S1_9	1	1	1	1	0
CE4	CE4	5	3	16	10.2	6.22
CE4	CE8	1	4	4	4	0
CE4	CE9	5	4	5	4.2	0.45
CE4	GH10	2	9	11	10	1.41
CE4	GH105	1	1	1	1	0
CE4	GH106	1	12	12	12	0
CE4	GH112	1	8	8	8	0
CE4	GH115	1	24	24	24	0
CE4	GH125	1	2	2	2	0
CE4	GH128	1	20	20	20	0
CE4	GH13	1	2	2	2	0
CE4	GH130	1	17	17	17	0
CE4	GH136	1	21	21	21	0
CE4	GH137	1	25	25	25	0
CE4	GH138	1	24	24	24	0
CE4	GH13_14	1	11	11	11	0
CE4	GH13_20	1	8	8	8	0
CE4	GH13_31	1	22	22	22	0
CE4	GH13_38	1	24	24	24	0
CE4	GH13_4	1	2	2	2	0
CE4	GH13_6	2	3	14	8.5	7.78
CE4	GH13_8	1	15	15	15	0
CE4	GH13_9	3	15	23	19.33	4.04
CE4	GH140	1	14	14	14	0
CE4	GH146	2	7	17	12	7.07
CE4	GH166	3	1	7	4.33	3.06
CE4	GH16_3	1	2	2	2	0
CE4	GH18	1	12	12	12	0
CE4	GH2	13	4	23	13	6.44
CE4	GH23	5	10	20	13.8	3.77
CE4	GH25	2	7	16	11.5	6.36
CE4	GH28	4	4	20	11	6.68
CE4	GH3	12	1	17	5.83	5.8
CE4	GH31	12	4	21	11.17	5.87
CE4	GH32	4	7	25	15.5	8.06
CE4	GH35	1	2	2	2	0
CE4	GH42	1	17	17	17	0
CE4	GH43_10	1	6	6	6	0
CE4	GH43_16	1	5	5	5	0
CE4	GH43_17	1	24	24	24	0
CE4	GH43_35	1	21	21	21	0
CE4	GH43_4	1	5	5	5	0
CE4	GH43_5	1	3	3	3	0
CE4	GH51	1	4	4	4	0
CE4	GH53	5	2	19	10.6	6.58
CE4	GH5_28	1	16	16	16	0
CE4	GH5_4	1	20	20	20	0
CE4	GH5_46	1	1	1	1	0
CE4	GH5_7	1	14	14	14	0
CE4	GH73	2	22	24	23	1.41
CE4	GH77	5	3	22	9.8	7.69
CE4	GH78	2	4	18	11	9.9
CE4	GH8	1	1	1	1	0
CE4	GH89	1	24	24	24	0
CE4	GH94	1	14	14	14	0
CE4	GH95	4	8	17	12	4.24
CE4	GH97	2	3	22	12.5	13.44
CE4	GT10	2	4	5	4.5	0.71
CE4	GT101	1	15	15	15	0
CE4	GT11	5	3	13	7.6	4.62
CE4	GT111	1	25	25	25	0
CE4	GT19	3	3	24	14.67	10.69
CE4	GT26	1	13	13	13	0
CE4	GT28	6	2	25	13.67	9.52
CE4	GT2_Glyco_tranf_2_3	1	1	1	1	0
CE4	GT2_Glyco_tranf_2_4	2	2	7	4.5	3.54
CE4	GT2_Glyco_tranf_2_5	2	3	11	7	5.66
CE4	GT2_Glycos_transf_2	109	1	25	7.91	7.33
CE4	GT30	1	7	7	7	0
CE4	GT32	13	1	25	10.31	7.45
CE4	GT35	2	19	24	21.5	3.54
CE4	GT4	35	1	21	10.34	6.21
CE4	GT41	4	2	18	6	8
CE4	GT5	2	21	22	21.5	0.71
CE4	GT51	3	2	21	12	9.54
CE4	GT6	1	13	13	13	0
CE4	GT8	6	1	24	9.67	9.2
CE4	GT81	1	14	14	14	0
CE4	GT83	4	2	3	2.75	0.5
CE4	GT9	7	3	24	9.43	6.92
CE4	GT90	4	2	11	6.25	3.77
CE4	GT92	4	1	3	1.75	0.96
CE4	PL11	1	1	1	1	0
CE4	PL11_1	4	1	11	4.75	4.5
CE4	PL26	1	13	13	13	0
CE4	PL9	1	8	8	8	0
CE4	PL9_1	1	4	4	4	0
CE4	S1_11	6	4	17	13	4.73
CE4	S1_14	4	7	22	13	6.48
CE4	S1_16	6	4	23	11.83	7
CE4	S1_18	1	7	7	7	0
CE4	S1_2	2	6	24	15	12.73
CE4	S1_22	1	2	2	2	0
CE4	S1_23	1	1	1	1	0
CE4	S1_24	1	10	10	10	0
CE4	S1_27	8	2	18	9.12	4.61
CE4	S1_28	2	15	17	16	1.41
CE4	S1_32	1	9	9	9	0
CE4	S1_4	4	2	13	5.25	5.19
CE4	S1_48	2	5	6	5.5	0.71
CE4	S1_64	1	8	8	8	0
CE4	S1_65	3	7	13	9.67	3.06
CE4	S1_66	1	17	17	17	0
CE4	S1_7	3	6	16	12	5.29
CE4	S1_8	2	11	25	18	9.9
CE4	S3	1	23	23	23	0
CE4	SLH	2	4	14	9	7.07
CE6	GH10	9	1	6	3.22	2.11
CE6	GH105	2	3	8	5.5	3.54
CE6	GH115	3	1	10	5	4.58
CE6	GH13_38	2	4	5	4.5	0.71
CE6	GH146	1	13	13	13	0
CE6	GH2	6	1	22	5.83	8.04
CE6	GH27	1	14	14	14	0
CE6	GH29	1	23	23	23	0
CE6	GH3	12	1	23	7.5	7.06
CE6	GH30_8	3	2	4	3.33	1.15
CE6	GH31	13	1	17	3.92	4.27
CE6	GH35	2	14	25	19.5	7.78
CE6	GH36	1	17	17	17	0
CE6	GH43_10	9	1	22	4.22	6.74
CE6	GH43_16	4	1	3	2.25	0.96
CE6	GH43_17	2	1	2	1.5	0.71
CE6	GH43_19	1	4	4	4	0
CE6	GH43_2	3	4	17	10	6.56
CE6	GH43_24	3	8	9	8.33	0.58
CE6	GH43_29	8	1	8	4.5	2.73
CE6	GH43_35	4	2	12	4.75	4.86
CE6	GH43_7	6	3	18	7.33	5.79
CE6	GH51	3	1	18	10	8.54
CE6	GH5_21	9	1	10	2.11	2.98
CE6	GH67	1	20	20	20	0
CE6	GH73	1	10	10	10	0
CE6	GH8	4	1	10	5.5	3.87
CE6	GH95	3	11	19	13.67	4.62
CE6	GH97	14	1	21	5.79	5.52
CE6	GH98	1	1	1	1	0
CE6	GT2_Glycos_transf_2	6	3	17	9.33	6.28
CE6	GT4	1	2	2	2	0
CE6	GT9	1	4	4	4	0
CE6	PL11_1	1	17	17	17	0
CE6	S1_11	1	1	1	1	0
CE6	S1_14	3	2	6	3.33	2.31
CE6	S1_16	3	5	10	8.33	2.89
CE6	S1_22	2	2	7	4.5	3.54
CE6	S1_24	3	3	4	3.67	0.58
CE6	S1_27	10	3	21	8	5.42
CE6	S1_7	8	1	16	5.38	4.84
CE6	S1_8	4	2	5	2.75	1.5
CE6	S3	4	2	3	2.75	0.5
CE6	S4	1	16	16	16	0
CE7	CE7	1	15	15	15	0
CE7	CE8	6	1	20	7.17	7.78
CE7	GH105	3	1	5	3.67	2.31
CE7	GH106	1	2	2	2	0
CE7	GH109	2	3	18	10.5	10.61
CE7	GH115	1	24	24	24	0
CE7	GH13	1	18	18	18	0
CE7	GH130	16	1	11	2.75	2.35
CE7	GH133	2	4	5	4.5	0.71
CE7	GH136	1	1	1	1	0
CE7	GH13_14	1	19	19	19	0
CE7	GH141	1	16	16	16	0
CE7	GH146	1	5	5	5	0
CE7	GH154	1	2	2	2	0
CE7	GH16_3	2	11	23	17	8.49
CE7	GH2	8	1	14	7.25	4.27
CE7	GH20	1	5	5	5	0
CE7	GH23	1	18	18	18	0
CE7	GH26	25	1	14	3	3.52
CE7	GH27	3	1	10	5.33	4.51
CE7	GH28	1	15	15	15	0
CE7	GH3	7	1	24	7.14	8.86
CE7	GH30_3	1	25	25	25	0
CE7	GH31	7	1	17	8.71	6.02
CE7	GH35	2	2	7	4.5	3.54
CE7	GH36	7	2	17	6.14	5.98
CE7	GH38	1	1	1	1	0
CE7	GH43_10	1	11	11	11	0
CE7	GH43_12	1	15	15	15	0
CE7	GH43_24	2	12	22	17	7.07
CE7	GH43_3	1	4	4	4	0
CE7	GH43_34	1	15	15	15	0
CE7	GH43_4	2	9	13	11	2.83
CE7	GH43_5	2	5	11	8	4.24
CE7	GH51	2	3	10	6.5	4.95
CE7	GH53	2	1	7	4	4.24
CE7	GH57	2	2	3	2.5	0.71
CE7	GH5_4	13	1	17	7.77	5.2
CE7	GH5_7	12	1	9	2.67	2.87
CE7	GH76	1	4	4	4	0
CE7	GH77	1	21	21	21	0
CE7	GH78	3	3	13	8.33	5.03
CE7	GH9	2	3	14	8.5	7.78
CE7	GH94	3	1	12	7.67	5.86
CE7	GH95	1	12	12	12	0
CE7	GH97	2	3	20	11.5	12.02
CE7	GT2_Glyco_tranf_2_3	1	24	24	24	0
CE7	GT2_Glycos_transf_2	4	20	24	22.5	1.73
CE7	GT4	9	3	25	16.56	8.37
CE7	GT41	3	13	24	18.33	5.51
CE7	GT5	1	13	13	13	0
CE7	GT51	1	4	4	4	0
CE7	GT83	1	16	16	16	0
CE7	PL1	2	14	15	14.5	0.71
CE7	PL10_2	1	2	2	2	0
CE7	PL1_2	2	11	12	11.5	0.71
CE7	PL22	1	6	6	6	0
CE7	PL6_1	2	5	8	6.5	2.12
CE7	PL9	1	10	10	10	0
CE7	PL9_1	2	1	9	5	5.66
CE7	S1_11	3	8	17	12.33	4.51
CE7	S1_15	1	9	9	9	0
CE7	S1_16	4	1	15	8	6.22
CE7	S1_20	2	10	13	11.5	2.12
CE7	S1_22	3	2	25	16.33	12.5
CE7	S1_25	1	16	16	16	0
CE7	S1_27	29	1	24	8.21	7.01
CE7	S1_30	1	6	6	6	0
CE7	S1_63	1	2	2	2	0
CE7	S1_7	3	3	8	6.33	2.89
CE7	S1_8	2	5	16	10.5	7.78
CE7	S1_9	5	2	18	9	7.62
CE7	S3	1	6	6	6	0
CE7	S4	1	23	23	23	0
CE8	CE8	6	1	16	9.17	6.68
CE8	GH1	1	14	14	14	0
CE8	GH105	21	1	13	3.52	4.15
CE8	GH106	3	8	16	13	4.36
CE8	GH133	3	6	18	11.33	6.11
CE8	GH139	1	16	16	16	0
CE8	GH13_14	2	1	1	1	0
CE8	GH13_39	1	14	14	14	0
CE8	GH140	1	23	23	23	0
CE8	GH143	1	20	20	20	0
CE8	GH146	1	18	18	18	0
CE8	GH163	1	4	4	4	0
CE8	GH2	3	17	25	20	4.36
CE8	GH23	20	2	24	5.8	7.13
CE8	GH26	1	7	7	7	0
CE8	GH27	1	6	6	6	0
CE8	GH28	18	1	13	4.44	4.84
CE8	GH29	1	16	16	16	0
CE8	GH3	11	1	18	7.91	5.5
CE8	GH31	1	1	1	1	0
CE8	GH33	2	5	23	14	12.73
CE8	GH36	1	20	20	20	0
CE8	GH37	1	9	9	9	0
CE8	GH4	1	14	14	14	0
CE8	GH43_1	1	17	17	17	0
CE8	GH43_10	7	1	11	6	4.69
CE8	GH43_2	1	12	12	12	0
CE8	GH43_24	1	20	20	20	0
CE8	GH43_29	2	2	11	6.5	6.36
CE8	GH43_5	1	20	20	20	0
CE8	GH43_7	1	13	13	13	0
CE8	GH53	1	7	7	7	0
CE8	GH57	3	4	16	9.33	6.11
CE8	GH5_2	4	7	12	9.5	2.38
CE8	GH5_38	3	6	11	9	2.65
CE8	GH67	1	12	12	12	0
CE8	GH73	1	9	9	9	0
CE8	GH77	1	18	18	18	0
CE8	GH78	2	8	24	16	11.31
CE8	GH9	2	6	7	6.5	0.71
CE8	GH92	1	19	19	19	0
CE8	GH94	2	6	16	11	7.07
CE8	GH95	2	3	22	12.5	13.44
CE8	GH97	1	20	20	20	0
CE8	GT11	2	8	9	8.5	0.71
CE8	GT19	9	6	13	7.44	2.13
CE8	GT27	1	10	10	10	0
CE8	GT28	1	22	22	22	0
CE8	GT2_Glyco_tranf_2_3	1	2	2	2	0
CE8	GT2_Glycos_transf_2	8	11	24	20.25	4.2
CE8	GT30	1	13	13	13	0
CE8	GT32	2	12	23	17.5	7.78
CE8	GT4	9	5	17	9.22	3.93
CE8	GT41	3	3	18	8	8.66
CE8	GT9	1	12	12	12	0
CE8	GT90	1	15	15	15	0
CE8	GT94	1	14	14	14	0
CE8	PL1	13	1	14	5.38	4.75
CE8	PL10_1	2	2	2	2	0
CE8	PL11	1	3	3	3	0
CE8	PL11_1	2	11	12	11.5	0.71
CE8	PL1_2	24	1	14	3.62	3.32
CE8	PL22	1	1	1	1	0
CE8	PL9	4	1	4	1.75	1.5
CE8	PL9_1	2	3	4	3.5	0.71
CE8	S1_14	2	14	14	14	0
CE8	S1_16	4	1	22	8.25	9.67
CE8	S1_18	1	10	10	10	0
CE8	S1_2	6	2	21	10.33	6.77
CE8	S1_27	51	1	25	8.71	7.44
CE8	S1_30	1	12	12	12	0
CE8	S1_63	1	1	1	1	0
CE8	S1_7	5	1	18	9.8	6.53
CE8	S1_8	1	5	5	5	0
CE8	S3	2	1	8	4.5	4.95
CE9	CE9	2	1	4	2.5	2.12
CE9	GH106	1	5	5	5	0
CE9	GH109	1	6	6	6	0
CE9	GH13	1	12	12	12	0
CE9	GH13_11	1	13	13	13	0
CE9	GH13_29	1	10	10	10	0
CE9	GH13_31	1	3	3	3	0
CE9	GH16_3	1	20	20	20	0
CE9	GH18	1	5	5	5	0
CE9	GH2	3	1	7	5	3.46
CE9	GH23	5	6	23	11.2	6.76
CE9	GH25	1	20	20	20	0
CE9	GH3	4	2	18	11.5	6.81
CE9	GH31	1	3	3	3	0
CE9	GH32	1	15	15	15	0
CE9	GH43_10	1	1	1	1	0
CE9	GH43_16	1	2	2	2	0
CE9	GH43_3	1	2	2	2	0
CE9	GH43_33	1	4	4	4	0
CE9	GH51	2	3	8	5.5	3.54
CE9	GH57	1	8	8	8	0
CE9	GH73	1	12	12	12	0
CE9	GH77	1	8	8	8	0
CE9	GH84	1	19	19	19	0
CE9	GH97	3	8	23	13.33	8.39
CE9	GT111	1	8	8	8	0
CE9	GT19	1	16	16	16	0
CE9	GT26	1	9	9	9	0
CE9	GT2_Glycos_transf_2	38	1	24	9.16	7.06
CE9	GT30	4	3	4	3.75	0.5
CE9	GT32	1	19	19	19	0
CE9	GT4	4	8	21	16	5.6
CE9	GT41	6	1	15	7.67	5.28
CE9	GT5	4	1	18	6.25	7.93
CE9	GT51	3	3	21	12.33	9.02
CE9	GT8	1	9	9	9	0
CE9	GT83	5	4	18	9.8	5.67
CE9	GT92	1	8	8	8	0
CE9	PL22	1	14	14	14	0
CE9	S1_11	3	1	8	3.67	3.79
CE9	S1_20	1	2	2	2	0
CE9	S1_27	10	1	15	5.8	5.85
CE9	S1_4	1	9	9	9	0
CE9	S1_48	1	2	2	2	0
CE9	S1_6	1	25	25	25	0
CE9	S1_63	1	6	6	6	0
CE9	S1_7	1	18	18	18	0
CE9	S1_8	1	19	19	19	0
CE9	S1_9	4	1	15	4.75	6.85
CE9	S3	3	1	1	1	0
CE9	SLH	3	1	17	7.67	8.33
GH102	GH103	1	10	10	10	0
GH102	GT101	1	18	18	18	0
GH102	GT2_Glyco_tranf_2_4	1	10	10	10	0
GH102	GT2_Glycos_transf_2	7	5	12	7.57	2.57
GH102	GT32	3	4	5	4.33	0.58
GH102	GT4	1	6	6	6	0
GH102	PL22	1	21	21	21	0
GH103	GT28	1	4	4	4	0
GH103	GT41	1	12	12	12	0
GH103	GT5	1	14	14	14	0
GH103	GT8	1	11	11	11	0
GH103	S1_7	1	8	8	8	0
GH105	GH105	1	11	11	11	0
GH105	GH106	6	1	5	1.83	1.6
GH105	GH112	1	7	7	7	0
GH105	GH115	3	4	10	7.67	3.21
GH105	GH13	1	12	12	12	0
GH105	GH136	1	6	6	6	0
GH105	GH137	1	6	6	6	0
GH105	GH138	1	7	7	7	0
GH105	GH13_14	1	13	13	13	0
GH105	GH13_20	1	9	9	9	0
GH105	GH13_3	1	9	9	9	0
GH105	GH13_38	1	3	3	3	0
GH105	GH13_39	1	13	13	13	0
GH105	GH140	2	9	15	12	4.24
GH105	GH154	2	1	1	1	0
GH105	GH163	2	9	13	11	2.83
GH105	GH2	24	1	20	6.42	5.69
GH105	GH23	2	19	23	21	2.83
GH105	GH25	1	25	25	25	0
GH105	GH26	2	4	8	6	2.83
GH105	GH27	1	5	5	5	0
GH105	GH28	28	1	22	3.04	4.29
GH105	GH29	2	1	16	8.5	10.61
GH105	GH3	10	1	21	9.9	6.66
GH105	GH31	4	1	17	6.5	7.14
GH105	GH33	3	6	22	13	8.19
GH105	GH35	4	3	17	8.25	6.08
GH105	GH36	2	5	7	6	1.41
GH105	GH4	3	1	6	3	2.65
GH105	GH42	3	3	18	8.33	8.39
GH105	GH43_10	8	3	23	8.62	6.74
GH105	GH43_17	2	4	25	14.5	14.85
GH105	GH43_19	4	5	21	13	6.53
GH105	GH43_24	1	12	12	12	0
GH105	GH43_29	1	3	3	3	0
GH105	GH51	8	1	19	10.25	6.14
GH105	GH53	5	4	19	8.8	6.14
GH105	GH5_38	1	8	8	8	0
GH105	GH5_4	2	1	8	4.5	4.95
GH105	GH67	1	7	7	7	0
GH105	GH73	1	7	7	7	0
GH105	GH77	1	15	15	15	0
GH105	GH78	1	19	19	19	0
GH105	GH9	1	9	9	9	0
GH105	GH94	1	7	7	7	0
GH105	GH95	3	9	10	9.67	0.58
GH105	GH97	4	1	14	7.5	5.32
GH105	GH98	1	8	8	8	0
GH105	GT11	1	1	1	1	0
GH105	GT27	1	11	11	11	0
GH105	GT2_Glyco_tranf_2_3	5	3	20	16	7.28
GH105	GT2_Glycos_transf_2	15	2	24	14.13	7.71
GH105	GT30	1	4	4	4	0
GH105	GT32	1	21	21	21	0
GH105	GT4	10	1	22	7.3	7.35
GH105	GT41	3	15	23	19.67	4.16
GH105	GT51	1	5	5	5	0
GH105	GT8	1	1	1	1	0
GH105	GT83	2	8	11	9.5	2.12
GH105	GT94	1	15	15	15	0
GH105	PL1	4	1	9	3.25	3.86
GH105	PL10_1	1	7	7	7	0
GH105	PL10_2	1	7	7	7	0
GH105	PL11_1	7	1	16	8	5.45
GH105	PL1_2	19	1	12	2.95	3.7
GH105	PL26	4	2	12	4.75	4.86
GH105	PL33_1	2	1	1	1	0
GH105	PL33_2	1	1	1	1	0
GH105	PL9	3	7	9	8	1
GH105	S1_11	2	4	5	4.5	0.71
GH105	S1_14	5	1	3	2	0.71
GH105	S1_16	6	1	24	10.17	11.03
GH105	S1_2	8	4	20	8.75	6.25
GH105	S1_22	1	17	17	17	0
GH105	S1_25	2	3	8	5.5	3.54
GH105	S1_27	42	1	24	7.93	7.48
GH105	S1_28	2	7	16	11.5	6.36
GH105	S1_7	4	6	25	14.5	9.04
GH105	S1_8	1	10	10	10	0
GH105	S3	1	9	9	9	0
GH106	GH106	4	1	10	5.25	4.92
GH106	GH109	8	1	22	11.25	8.21
GH106	GH115	1	6	6	6	0
GH106	GH123	1	17	17	17	0
GH106	GH127	4	2	17	6.75	6.9
GH106	GH13	3	16	20	17.67	2.08
GH106	GH137	3	3	5	4.33	1.15
GH106	GH138	4	4	14	9.25	4.11
GH106	GH139	4	2	14	5.25	5.85
GH106	GH13_36	1	19	19	19	0
GH106	GH140	3	6	12	10	3.46
GH106	GH141	7	6	19	11.14	5.11
GH106	GH143	2	10	15	12.5	3.54
GH106	GH146	4	1	2	1.25	0.5
GH106	GH163	6	7	20	12	4.34
GH106	GH16_3	3	3	18	12.67	8.39
GH106	GH2	31	1	21	6.81	6.48
GH106	GH20	2	2	9	5.5	4.95
GH106	GH25	1	9	9	9	0
GH106	GH27	11	1	11	4.82	4.14
GH106	GH28	17	1	23	5.88	6.13
GH106	GH29	2	8	8	8	0
GH106	GH3	13	1	23	9.23	7.4
GH106	GH30_8	1	15	15	15	0
GH106	GH31	8	2	18	8.25	5.65
GH106	GH35	4	1	18	8.75	7.04
GH106	GH38	1	5	5	5	0
GH106	GH39	1	1	1	1	0
GH106	GH4	1	2	2	2	0
GH106	GH43	1	6	6	6	0
GH106	GH43_10	1	1	1	1	0
GH106	GH43_18	4	11	22	14.5	5.07
GH106	GH43_19	1	7	7	7	0
GH106	GH43_2	3	1	8	4.33	3.51
GH106	GH43_24	1	13	13	13	0
GH106	GH43_29	1	5	5	5	0
GH106	GH43_35	3	9	19	12.67	5.51
GH106	GH43_4	1	20	20	20	0
GH106	GH43_7	1	3	3	3	0
GH106	GH51	2	5	7	6	1.41
GH106	GH53	2	18	18	18	0
GH106	GH5_13	1	2	2	2	0
GH106	GH5_4	1	4	4	4	0
GH106	GH63	3	3	7	5.33	2.08
GH106	GH73	2	3	9	6	4.24
GH106	GH78	27	1	23	9.11	6.72
GH106	GH9	5	3	25	12.2	9.09
GH106	GH92	12	1	18	8.58	5.09
GH106	GH94	1	8	8	8	0
GH106	GH95	5	3	13	6.8	3.77
GH106	GH97	5	2	18	6.6	7.06
GH106	GH99	4	5	17	9.25	5.32
GH106	GT28	1	16	16	16	0
GH106	GT2_Glyco_tranf_2_3	3	9	14	11.67	2.52
GH106	GT2_Glycos_transf_2	11	6	24	14.55	5.59
GH106	GT32	2	11	19	15	5.66
GH106	GT4	6	7	25	15.33	5.75
GH106	GT41	3	13	21	16.67	4.04
GH106	GT5	2	21	21	21	0
GH106	GT51	1	4	4	4	0
GH106	PL11_1	7	5	17	11.57	4.76
GH106	PL1_2	4	10	24	17.75	6.13
GH106	PL29	2	17	21	19	2.83
GH106	PL35	1	11	11	11	0
GH106	PL40	1	3	3	3	0
GH106	S1_11	3	6	23	11.67	9.81
GH106	S1_14	2	1	18	9.5	12.02
GH106	S1_15	1	21	21	21	0
GH106	S1_16	11	2	18	9	5.98
GH106	S1_2	2	5	18	11.5	9.19
GH106	S1_20	7	2	15	7.29	5.09
GH106	S1_25	11	2	21	12.82	7.33
GH106	S1_27	24	2	24	10.08	7
GH106	S1_28	1	7	7	7	0
GH106	S1_37	3	4	5	4.67	0.58
GH106	S1_59	1	15	15	15	0
GH106	S1_63	2	5	22	13.5	12.02
GH106	S1_64	3	14	24	17.67	5.51
GH106	S1_7	3	1	20	10.33	9.5
GH106	S1_8	1	11	11	11	0
GH106	S1_9	1	5	5	5	0
GH106	S3	1	9	9	9	0
GH109	GH109	10	1	21	4.5	5.95
GH109	GH115	4	9	12	10.25	1.26
GH109	GH125	2	23	24	23.5	0.71
GH109	GH13	1	11	11	11	0
GH109	GH130	2	22	23	22.5	0.71
GH109	GH133	1	22	22	22	0
GH109	GH13_38	2	3	15	9	8.49
GH109	GH13_6	1	1	1	1	0
GH109	GH13_8	1	23	23	23	0
GH109	GH163	4	9	18	13.5	3.87
GH109	GH16_3	5	2	19	12.8	7.12
GH109	GH18	1	1	1	1	0
GH109	GH2	15	1	25	12.27	8.28
GH109	GH20	1	2	2	2	0
GH109	GH25	2	15	18	16.5	2.12
GH109	GH27	5	3	18	12.6	6.5
GH109	GH28	5	5	14	8.6	3.58
GH109	GH29	3	2	7	5	2.65
GH109	GH3	7	3	22	9.71	6.73
GH109	GH30_3	1	7	7	7	0
GH109	GH31	3	3	14	8	5.57
GH109	GH32	1	25	25	25	0
GH109	GH33	4	2	5	3	1.41
GH109	GH35	1	3	3	3	0
GH109	GH36	3	2	12	5.33	5.77
GH109	GH39	1	11	11	11	0
GH109	GH43	2	16	17	16.5	0.71
GH109	GH43_10	1	18	18	18	0
GH109	GH43_18	2	7	14	10.5	4.95
GH109	GH43_19	2	16	17	16.5	0.71
GH109	GH43_2	2	14	19	16.5	3.54
GH109	GH43_24	2	4	8	6	2.83
GH109	GH43_35	2	10	11	10.5	0.71
GH109	GH43_4	2	13	15	14	1.41
GH109	GH51	1	16	16	16	0
GH109	GH53	1	13	13	13	0
GH109	GH57	1	20	20	20	0
GH109	GH63	2	5	5	5	0
GH109	GH73	1	8	8	8	0
GH109	GH76	2	3	3	3	0
GH109	GH77	1	19	19	19	0
GH109	GH78	13	1	24	11.15	8.77
GH109	GH89	1	1	1	1	0
GH109	GH9	3	5	16	9	6.08
GH109	GH92	13	2	25	8.54	8.43
GH109	GH94	2	3	7	5	2.83
GH109	GH95	1	13	13	13	0
GH109	GH97	2	5	10	7.5	3.54
GH109	GH99	4	9	17	13.5	3.7
GH109	GT19	1	1	1	1	0
GH109	GT26	2	1	5	3	2.83
GH109	GT2_Glycos_transf_2	10	1	22	6	7.83
GH109	GT3	1	19	19	19	0
GH109	GT4	11	1	21	8.09	7.67
GH109	GT41	4	2	18	10.75	6.6
GH109	GT51	2	3	15	9	8.49
GH109	PL11_2	1	7	7	7	0
GH109	PL22	1	13	13	13	0
GH109	S1_11	3	1	7	5	3.46
GH109	S1_14	1	5	5	5	0
GH109	S1_16	6	2	20	11.67	5.89
GH109	S1_17	2	1	10	5.5	6.36
GH109	S1_2	3	11	22	17.67	5.86
GH109	S1_20	6	5	24	11	6.9
GH109	S1_22	7	1	24	10	7.02
GH109	S1_25	13	1	22	4.38	6.86
GH109	S1_27	22	2	24	12.41	7.42
GH109	S1_35	4	1	3	1.5	1
GH109	S1_37	2	3	24	13.5	14.85
GH109	S1_4	2	1	18	9.5	12.02
GH109	S1_59	1	7	7	7	0
GH109	S1_63	3	1	12	6.33	5.51
GH109	S1_64	2	5	16	10.5	7.78
GH109	S1_7	7	5	16	9.14	4.45
GH109	S1_8	2	1	2	1.5	0.71
GH109	S1_9	2	8	10	9	1.41
GH109	S4	2	11	21	16	7.07
GH10	GH10	4	2	8	4.75	3.2
GH10	GH115	2	20	25	22.5	3.54
GH10	GH146	1	3	3	3	0
GH10	GH2	5	1	25	10.6	12.26
GH10	GH25	1	9	9	9	0
GH10	GH29	1	3	3	3	0
GH10	GH3	10	3	24	10.2	6.29
GH10	GH30_8	4	2	7	4.75	2.06
GH10	GH31	5	1	18	6.8	7.46
GH10	GH39	1	4	4	4	0
GH10	GH43_1	4	1	9	4.75	4.35
GH10	GH43_10	7	3	6	4.29	1.38
GH10	GH43_12	2	1	7	4	4.24
GH10	GH43_16	5	1	10	5.8	3.49
GH10	GH43_17	1	5	5	5	0
GH10	GH43_2	4	2	20	12	8.49
GH10	GH43_29	3	8	10	9.33	1.15
GH10	GH43_34	1	23	23	23	0
GH10	GH43_35	2	1	6	3.5	3.54
GH10	GH43_5	1	22	22	22	0
GH10	GH43_7	5	3	21	12	7.68
GH10	GH51	2	3	8	5.5	3.54
GH10	GH5_21	9	1	11	5.11	3.44
GH10	GH5_37	1	2	2	2	0
GH10	GH5_4	1	5	5	5	0
GH10	GH67	4	3	23	12.75	10.72
GH10	GH8	3	3	10	7	3.61
GH10	GH9	1	6	6	6	0
GH10	GH95	3	3	17	8.33	7.57
GH10	GH97	5	7	23	13.6	6.47
GH10	GH98	1	21	21	21	0
GH10	GT2_Glycos_transf_2	6	1	23	11.67	8.85
GH10	GT4	2	2	2	2	0
GH10	GT41	2	5	7	6	1.41
GH10	GT51	1	3	3	3	0
GH10	PL9	1	6	6	6	0
GH10	S1_16	3	4	24	13.33	10.07
GH10	S1_2	1	20	20	20	0
GH10	S1_22	1	4	4	4	0
GH10	S1_24	2	1	1	1	0
GH10	S1_27	27	1	20	6.93	4.91
GH10	S1_5	2	2	3	2.5	0.71
GH10	S1_7	7	1	19	10.43	6
GH10	S1_8	2	1	1	1	0
GH10	S3	1	5	5	5	0
GH112	GH13_20	1	16	16	16	0
GH112	GH140	1	22	22	22	0
GH112	GH28	1	4	4	4	0
GH112	GH35	1	10	10	10	0
GH112	GH42	1	25	25	25	0
GH112	GH95	1	17	17	17	0
GH112	S1_11	1	12	12	12	0
GH112	S1_28	1	23	23	23	0
GH114	GH23	1	12	12	12	0
GH114	GT4	1	5	5	5	0
GH114	GT41	1	18	18	18	0
GH114	S1_2	1	10	10	10	0
GH115	GH115	4	1	7	4.75	2.63
GH115	GH13	4	2	8	5.5	2.65
GH115	GH130	2	12	22	17	7.07
GH115	GH139	2	5	10	7.5	3.54
GH115	GH13_14	3	1	6	3.67	2.52
GH115	GH13_20	1	25	25	25	0
GH115	GH13_38	2	5	15	10	7.07
GH115	GH141	1	23	23	23	0
GH115	GH146	5	1	25	10.8	10.59
GH115	GH154	1	14	14	14	0
GH115	GH16_3	1	23	23	23	0
GH115	GH18	1	9	9	9	0
GH115	GH2	15	1	13	5.4	4.44
GH115	GH20	1	9	9	9	0
GH115	GH23	1	4	4	4	0
GH115	GH25	1	2	2	2	0
GH115	GH26	1	23	23	23	0
GH115	GH27	4	1	6	4.5	2.38
GH115	GH28	11	1	15	5.64	4.39
GH115	GH29	1	9	9	9	0
GH115	GH3	14	2	24	10	6.39
GH115	GH30_3	1	25	25	25	0
GH115	GH31	6	3	8	6.67	1.86
GH115	GH32	1	7	7	7	0
GH115	GH33	1	12	12	12	0
GH115	GH35	2	3	8	5.5	3.54
GH115	GH36	3	4	21	11.33	8.74
GH115	GH43	1	3	3	3	0
GH115	GH43_1	7	3	24	10.86	7.69
GH115	GH43_10	8	1	20	8.5	6.28
GH115	GH43_12	1	2	2	2	0
GH115	GH43_16	4	1	8	5.25	3.1
GH115	GH43_19	2	1	3	2	1.41
GH115	GH43_2	1	6	6	6	0
GH115	GH43_24	2	16	20	18	2.83
GH115	GH43_29	8	1	14	5.12	4.91
GH115	GH43_35	8	2	13	4.5	4.17
GH115	GH43_7	7	6	22	10.57	5.83
GH115	GH50	1	2	2	2	0
GH115	GH51	6	2	17	11	5.66
GH115	GH5_21	2	9	14	11.5	3.54
GH115	GH5_4	2	6	9	7.5	2.12
GH115	GH5_7	1	25	25	25	0
GH115	GH66	1	5	5	5	0
GH115	GH67	9	1	22	6.44	7.55
GH115	GH76	1	7	7	7	0
GH115	GH77	4	3	8	5.75	2.06
GH115	GH8	1	10	10	10	0
GH115	GH84	1	4	4	4	0
GH115	GH9	3	1	12	8	6.08
GH115	GH92	7	8	25	14.14	5.7
GH115	GH94	1	24	24	24	0
GH115	GH95	11	1	10	3.36	3.23
GH115	GH97	11	1	13	4.82	4.12
GH115	GH98	7	1	6	2.43	1.99
GH115	GT11	2	7	8	7.5	0.71
GH115	GT28	1	5	5	5	0
GH115	GT2_Glyco_tranf_2_3	1	25	25	25	0
GH115	GT2_Glycos_transf_2	11	4	22	13.36	5.48
GH115	GT30	2	8	13	10.5	3.54
GH115	GT32	1	6	6	6	0
GH115	GT4	3	7	24	13.67	9.07
GH115	GT41	3	6	19	11.67	6.66
GH115	GT51	1	4	4	4	0
GH115	PL11	1	21	21	21	0
GH115	PL11_1	5	1	23	7.8	8.76
GH115	PL1_2	2	8	16	12	5.66
GH115	S1_11	1	21	21	21	0
GH115	S1_14	3	1	10	6.33	4.73
GH115	S1_16	7	3	18	10.71	4.61
GH115	S1_22	2	5	22	13.5	12.02
GH115	S1_25	1	9	9	9	0
GH115	S1_27	28	1	24	8.14	6.91
GH115	S1_28	2	7	23	15	11.31
GH115	S1_4	1	20	20	20	0
GH115	S1_63	2	1	2	1.5	0.71
GH115	S1_7	16	1	24	9.5	7.48
GH115	S1_8	3	1	16	9	7.55
GH115	S1_9	2	4	9	6.5	3.54
GH115	S3	1	2	2	2	0
GH116	GH33	1	14	14	14	0
GH119	S1_27	3	7	9	8	1
GH119	S3	2	5	6	5.5	0.71
GH120	GH13_11	1	2	2	2	0
GH120	GH43_12	1	4	4	4	0
GH123	GH127	1	19	19	19	0
GH123	GH130	1	10	10	10	0
GH123	GH27	2	7	14	10.5	4.95
GH123	GH51	1	6	6	6	0
GH123	GH97	1	4	4	4	0
GH123	S1_4	1	2	2	2	0
GH123	S1_8	1	6	6	6	0
GH125	GH127	1	1	1	1	0
GH125	GH13	3	7	14	11.33	3.79
GH125	GH130	5	1	5	3	1.58
GH125	GH18	1	4	4	4	0
GH125	GH2	6	3	11	7.83	3.13
GH125	GH20	1	2	2	2	0
GH125	GH29	2	8	11	9.5	2.12
GH125	GH3	1	24	24	24	0
GH125	GH31	1	1	1	1	0
GH125	GH33	2	3	4	3.5	0.71
GH125	GH35	1	23	23	23	0
GH125	GH36	2	1	23	12	15.56
GH125	GH38	2	1	2	1.5	0.71
GH125	GH43_19	1	7	7	7	0
GH125	GH43_28	1	2	2	2	0
GH125	GH43_8	1	4	4	4	0
GH125	GH53	1	11	11	11	0
GH125	GH65	1	9	9	9	0
GH125	GH76	1	12	12	12	0
GH125	GH92	17	1	11	3	3.32
GH125	GH97	4	1	20	10.25	8.14
GH125	GT2_Glycos_transf_2	1	9	9	9	0
GH125	GT4	3	1	3	2	1
GH125	GT83	1	8	8	8	0
GH125	S1_11	3	6	10	7.33	2.31
GH125	S1_14	1	18	18	18	0
GH125	S1_16	1	11	11	11	0
GH125	S1_2	1	5	5	5	0
GH125	S1_22	1	1	1	1	0
GH125	S1_27	6	3	20	12.5	6.47
GH125	S1_63	2	1	3	2	1.41
GH126	GT2_Glyco_tranf_2_3	1	4	4	4	0
GH127	GH13	2	4	11	7.5	4.95
GH127	GH137	1	8	8	8	0
GH127	GH138	1	7	7	7	0
GH127	GH13_28	1	5	5	5	0
GH127	GH13_38	2	12	15	13.5	2.12
GH127	GH13_6	1	22	22	22	0
GH127	GH13_7	1	6	6	6	0
GH127	GH141	3	1	5	3.33	2.08
GH127	GH16_3	1	17	17	17	0
GH127	GH2	1	3	3	3	0
GH127	GH23	1	7	7	7	0
GH127	GH27	3	2	18	8.33	8.5
GH127	GH28	2	1	1	1	0
GH127	GH3	4	1	5	3	2.31
GH127	GH31	3	3	6	5	1.73
GH127	GH32	1	5	5	5	0
GH127	GH39	1	4	4	4	0
GH127	GH43_35	1	1	1	1	0
GH127	GH73	1	8	8	8	0
GH127	GH77	1	13	13	13	0
GH127	GH78	4	1	16	6.25	6.85
GH127	GH92	7	4	8	5.14	1.46
GH127	GH93	1	8	8	8	0
GH127	GH97	3	1	17	6.67	8.96
GH127	GT19	1	1	1	1	0
GH127	GT2_Glycos_transf_2	2	22	23	22.5	0.71
GH127	GT41	2	6	14	10	5.66
GH127	GT51	1	19	19	19	0
GH127	S1_11	2	2	2	2	0
GH127	S1_15	1	4	4	4	0
GH127	S1_16	1	2	2	2	0
GH127	S1_24	1	5	5	5	0
GH127	S1_27	5	1	11	6.2	4.55
GH127	S1_8	2	10	13	11.5	2.12
GH128	GH128	2	1	4	2.5	2.12
GH128	GH13_6	1	10	10	10	0
GH128	GH149	11	4	15	5.91	3.24
GH128	GH159	1	1	1	1	0
GH128	GH16_3	30	1	11	1.8	1.9
GH128	GH2	9	2	14	8.33	4.39
GH128	GH25	1	10	10	10	0
GH128	GH28	3	3	5	3.67	1.15
GH128	GH29	1	5	5	5	0
GH128	GH3	5	4	13	8	3.24
GH128	GH30_1	8	5	7	6	0.76
GH128	GH30_5	1	3	3	3	0
GH128	GH35	2	3	4	3.5	0.71
GH128	GH43_10	2	1	2	1.5	0.71
GH128	GH43_19	1	1	1	1	0
GH128	GH43_28	1	9	9	9	0
GH128	GH43_5	2	6	8	7	1.41
GH128	GH51	2	2	2	2	0
GH128	GH53	1	9	9	9	0
GH128	GH73	1	12	12	12	0
GH128	GH76	2	3	10	6.5	4.95
GH128	GH77	1	24	24	24	0
GH128	GH81	4	5	7	6.25	0.96
GH128	GH92	2	8	22	15	9.9
GH128	GH93	1	5	5	5	0
GH128	GH97	3	4	23	14.33	9.61
GH128	GT2_Glycos_transf_2	4	2	15	10	6.27
GH128	GT3	1	25	25	25	0
GH128	GT30	1	13	13	13	0
GH128	GT41	1	10	10	10	0
GH128	PL26	2	1	2	1.5	0.71
GH128	S1_14	1	6	6	6	0
GH128	S1_16	2	3	5	4	1.41
GH128	S1_17	1	12	12	12	0
GH128	S1_27	9	2	6	3.78	1.2
GH128	S1_7	1	12	12	12	0
GH128	S1_8	1	2	2	2	0
GH128	S3	1	4	4	4	0
GH129	GH13_39	1	18	18	18	0
GH129	S1_5	1	4	4	4	0
GH130	GH130	2	1	23	12	15.56
GH130	GH133	1	3	3	3	0
GH130	GH13_14	1	21	21	21	0
GH130	GH13_36	1	2	2	2	0
GH130	GH146	2	3	3	3	0
GH130	GH18	4	4	14	9.5	5.26
GH130	GH2	8	3	24	11.25	7.81
GH130	GH20	2	1	16	8.5	10.61
GH130	GH23	1	24	24	24	0
GH130	GH26	46	1	10	2.26	2.45
GH130	GH27	2	3	17	10	9.9
GH130	GH29	2	3	9	6	4.24
GH130	GH3	10	2	24	6.6	6.69
GH130	GH31	11	1	10	3.27	2.53
GH130	GH36	8	2	14	5.5	4.44
GH130	GH43_10	1	16	16	16	0
GH130	GH43_12	3	1	4	2.33	1.53
GH130	GH43_19	1	6	6	6	0
GH130	GH43_24	1	10	10	10	0
GH130	GH43_29	1	2	2	2	0
GH130	GH43_34	1	13	13	13	0
GH130	GH43_4	2	14	15	14.5	0.71
GH130	GH43_5	2	10	13	11.5	2.12
GH130	GH5	4	1	24	12	12.73
GH130	GH51	2	8	15	11.5	4.95
GH130	GH57	1	1	1	1	0
GH130	GH5_2	2	2	2	2	0
GH130	GH5_28	2	1	1	1	0
GH130	GH5_4	14	2	9	4.43	2.79
GH130	GH5_46	1	5	5	5	0
GH130	GH5_7	18	1	19	6.33	4.63
GH130	GH74	1	3	3	3	0
GH130	GH76	1	2	2	2	0
GH130	GH77	1	23	23	23	0
GH130	GH8	2	14	15	14.5	0.71
GH130	GH89	1	14	14	14	0
GH130	GH92	21	1	16	3.57	4.02
GH130	GH94	5	2	10	4	3.39
GH130	GH97	1	22	22	22	0
GH130	GT108	2	7	16	11.5	6.36
GH130	GT2_Glycos_transf_2	8	12	23	18.62	4.21
GH130	GT4	4	2	20	10.25	8.66
GH130	GT41	3	4	23	12.33	9.71
GH130	GT5	1	2	2	2	0
GH130	PL11_1	1	6	6	6	0
GH130	PL22	1	17	17	17	0
GH130	PL9_1	1	2	2	2	0
GH130	S1_11	3	3	11	6.33	4.16
GH130	S1_14	3	8	11	9.33	1.53
GH130	S1_16	7	2	6	4.43	1.62
GH130	S1_2	3	10	18	13.67	4.04
GH130	S1_20	1	11	11	11	0
GH130	S1_22	1	7	7	7	0
GH130	S1_25	1	11	11	11	0
GH130	S1_27	38	1	25	8.63	5.94
GH130	S1_28	1	10	10	10	0
GH130	S1_63	5	1	21	8	8.25
GH130	S1_7	6	2	23	7.5	8.5
GH130	S4	1	25	25	25	0
GH133	GH13_10	2	5	5	5	0
GH133	GH13_11	1	14	14	14	0
GH133	GH13_20	3	6	19	12.33	6.51
GH133	GH13_36	1	17	17	17	0
GH133	GH13_38	1	17	17	17	0
GH133	GH13_8	12	1	1	1	0
GH133	GH141	1	14	14	14	0
GH133	GH2	1	8	8	8	0
GH133	GH23	2	4	24	14	14.14
GH133	GH25	1	9	9	9	0
GH133	GH3	9	3	12	6.56	4.03
GH133	GH31	2	2	4	3	1.41
GH133	GH33	1	9	9	9	0
GH133	GH43_1	2	7	14	10.5	4.95
GH133	GH5	1	4	4	4	0
GH133	GH53	1	9	9	9	0
GH133	GH57	73	2	3	2.07	0.25
GH133	GH5_46	1	2	2	2	0
GH133	GH77	5	1	12	8.2	4.32
GH133	GH92	1	5	5	5	0
GH133	GH97	4	6	22	14.25	7.93
GH133	GT11	1	16	16	16	0
GH133	GT2_Glycos_transf_2	9	11	25	18.56	5.22
GH133	GT3	13	3	4	3.08	0.28
GH133	GT32	1	20	20	20	0
GH133	GT35	10	3	14	7.3	4.62
GH133	GT4	71	1	24	3.13	5.62
GH133	GT41	4	4	23	11.75	8.02
GH133	GT5	29	1	13	1.66	2.36
GH133	GT51	1	19	19	19	0
GH133	PL1	2	19	20	19.5	0.71
GH133	PL10_1	1	3	3	3	0
GH133	PL1_2	2	3	15	9	8.49
GH133	PL35	2	7	12	9.5	3.54
GH133	PL6_1	1	7	7	7	0
GH133	PL9	1	14	14	14	0
GH133	PL9_1	1	13	13	13	0
GH133	S1_14	4	5	21	14	6.83
GH133	S1_2	1	15	15	15	0
GH133	S1_20	1	19	19	19	0
GH133	S1_27	8	5	14	8	2.83
GH133	S1_28	1	7	7	7	0
GH133	S1_29	1	22	22	22	0
GH133	S1_30	3	22	25	23.67	1.53
GH133	S1_4	2	17	23	20	4.24
GH133	S1_7	4	2	20	10.75	7.37
GH133	S1_8	1	17	17	17	0
GH136	GH146	1	14	14	14	0
GH136	GH2	1	9	9	9	0
GH136	GH36	1	1	1	1	0
GH136	GH5_46	1	20	20	20	0
GH136	GH89	2	2	3	2.5	0.71
GH136	GT2_Glycos_transf_2	2	2	2	2	0
GH136	GT41	1	17	17	17	0
GH136	S1_22	1	23	23	23	0
GH136	S1_27	1	9	9	9	0
GH137	GH138	12	1	9	2.42	2.47
GH137	GH139	2	7	8	7.5	0.71
GH137	GH13_14	1	19	19	19	0
GH137	GH140	5	3	17	8.6	7.67
GH137	GH141	7	3	12	8	3.79
GH137	GH143	3	7	20	11.67	7.23
GH137	GH16_3	1	9	9	9	0
GH137	GH2	13	1	15	3.69	5.14
GH137	GH28	1	5	5	5	0
GH137	GH3	1	8	8	8	0
GH137	GH31	4	4	13	9	4.24
GH137	GH43_1	1	3	3	3	0
GH137	GH43_18	1	8	8	8	0
GH137	GH43_29	1	4	4	4	0
GH137	GH43_4	1	17	17	17	0
GH137	GH43_7	1	2	2	2	0
GH137	GH77	1	21	21	21	0
GH137	GH78	6	2	16	9.33	5.75
GH137	GH95	4	4	18	8	6.73
GH137	GH97	1	20	20	20	0
GH137	GT2_Glycos_transf_2	2	5	24	14.5	13.44
GH137	PL29	3	8	16	12	4
GH137	S1_11	2	18	22	20	2.83
GH137	S1_16	4	4	12	8.25	3.3
GH137	S1_25	4	2	2	2	0
GH137	S1_27	8	8	25	13.5	5.78
GH137	S1_7	3	3	5	4	1
GH138	GH138	2	1	1	1	0
GH138	GH139	3	11	17	13.33	3.21
GH138	GH13_14	1	20	20	20	0
GH138	GH140	6	2	22	8.5	10.07
GH138	GH141	10	2	21	7.3	7.32
GH138	GH143	1	6	6	6	0
GH138	GH163	1	6	6	6	0
GH138	GH16_3	1	10	10	10	0
GH138	GH2	17	2	24	7.76	7.2
GH138	GH28	2	6	8	7	1.41
GH138	GH3	2	9	10	9.5	0.71
GH138	GH31	7	2	22	11	7.53
GH138	GH35	1	19	19	19	0
GH138	GH43_1	1	1	1	1	0
GH138	GH43_18	1	7	7	7	0
GH138	GH43_29	2	5	6	5.5	0.71
GH138	GH43_7	2	3	4	3.5	0.71
GH138	GH77	1	22	22	22	0
GH138	GH78	10	1	25	8.9	9.72
GH138	GH95	4	3	8	5.25	2.63
GH138	GH97	1	21	21	21	0
GH138	GT2_Glycos_transf_2	2	14	23	18.5	6.36
GH138	GT4	2	16	25	20.5	6.36
GH138	PL29	4	7	8	7.25	0.5
GH138	S1_11	3	13	14	13.33	0.58
GH138	S1_16	4	3	4	3.25	0.5
GH138	S1_25	4	1	1	1	0
GH138	S1_27	8	4	18	10.25	4.2
GH138	S1_7	5	2	7	4.8	1.92
GH139	GH13_14	1	1	1	1	0
GH139	GH140	2	9	10	9.5	0.71
GH139	GH141	5	4	19	9	7.07
GH139	GH143	1	12	12	12	0
GH139	GH2	11	2	16	6.82	4.31
GH139	GH3	1	23	23	23	0
GH139	GH31	3	5	5	5	0
GH139	GH37	1	25	25	25	0
GH139	GH43_10	1	25	25	25	0
GH139	GH43_19	1	25	25	25	0
GH139	GH51	2	3	22	12.5	13.44
GH139	GH5_21	1	19	19	19	0
GH139	GH78	4	8	18	12	4.55
GH139	GH95	2	10	13	11.5	2.12
GH139	GH97	1	12	12	12	0
GH139	GH98	1	9	9	9	0
GH139	GT30	2	3	3	3	0
GH139	GT9	1	14	14	14	0
GH139	PL1_2	4	5	18	11.25	6.7
GH139	PL29	3	3	24	15.33	10.97
GH139	S1_11	1	25	25	25	0
GH139	S1_16	2	15	20	17.5	3.54
GH139	S1_27	5	1	21	5	8.94
GH13_10	GH13_6	8	1	6	3.62	1.69
GH13_10	GH25	1	23	23	23	0
GH13_10	GH77	2	16	17	16.5	0.71
GH13_10	GT2_Glycos_transf_2	1	22	22	22	0
GH13_10	GT4	3	4	23	10.33	10.97
GH13_10	S1_65	1	17	17	17	0
GH13_11	GH13_20	1	2	2	2	0
GH13_11	GH13_21	1	11	11	11	0
GH13_11	GH13_3	1	22	22	22	0
GH13_11	GH13_9	4	1	17	9	9.24
GH13_11	GH149	1	21	21	21	0
GH13_11	GH16_3	1	22	22	22	0
GH13_11	GH2	1	13	13	13	0
GH13_11	GH23	1	3	3	3	0
GH13_11	GH31	1	10	10	10	0
GH13_11	GH51	1	21	21	21	0
GH13_11	GH57	1	16	16	16	0
GH13_11	GH77	1	1	1	1	0
GH13_11	GT10	1	9	9	9	0
GH13_11	GT2_Glycos_transf_2	7	3	9	6.14	1.86
GH13_11	GT32	1	4	4	4	0
GH13_11	GT35	3	1	3	1.67	1.15
GH13_11	GT4	4	6	18	13.25	5.12
GH13_11	GT41	4	10	18	12.5	3.79
GH13_11	GT5	1	2	2	2	0
GH13_11	GT83	1	24	24	24	0
GH13_11	S1_14	1	21	21	21	0
GH13_11	S1_5	1	9	9	9	0
GH13_11	S1_8	1	10	10	10	0
GH13_14	GH13_14	5	1	2	1.2	0.45
GH13_14	GH13_20	2	1	18	9.5	12.02
GH13_14	GH13_28	3	1	4	2.33	1.53
GH13_14	GH13_36	2	1	1	1	0
GH13_14	GH13_6	5	6	14	11	3.16
GH13_14	GH13_7	3	9	11	9.67	1.15
GH13_14	GH13_9	4	6	11	8.5	2.08
GH13_14	GH140	1	22	22	22	0
GH13_14	GH144	1	22	22	22	0
GH13_14	GH146	1	9	9	9	0
GH13_14	GH2	4	10	18	14.25	3.3
GH13_14	GH26	1	20	20	20	0
GH13_14	GH28	1	14	14	14	0
GH13_14	GH29	1	13	13	13	0
GH13_14	GH3	5	4	21	11	7.31
GH13_14	GH31	3	9	25	19.33	8.96
GH13_14	GH32	2	3	15	9	8.49
GH13_14	GH36	1	17	17	17	0
GH13_14	GH43_10	2	5	10	7.5	3.54
[truncated: 3,872 more rows]

## Sheet: all fish cazy-sulf pairs
pairname	pat1	pat2	gene_dist	nt_dist	self - match
AA10_AA3_1	AA10	AA3_1	54	63049	FALSE
AA10_AA3_1	AA10	AA3_1	54	62949	FALSE
AA10_AA3_1	AA10	AA3_1	53	63156	FALSE
AA10_CE1	AA10	CE1	13	14025	FALSE
AA10_CE1	AA10	CE1	13	14025	FALSE
AA10_GH1	AA10	GH1	26	27679	FALSE
AA10_GH1	AA10	GH1	26	27679	FALSE
AA10_GH32	AA10	GH32	102	113007	FALSE
AA10_GH32	AA10	GH32	102	112907	FALSE
AA10_GH63	AA10	GH63	14	15433	FALSE
AA10_GH63	AA10	GH63	14	15433	FALSE
AA10_GT2_Glyco_tranf_2_3	AA10	GT2_Glyco_tranf_2_3	31	35599	FALSE
AA10_GT2_Glyco_tranf_2_3	AA10	GT2_Glyco_tranf_2_3	31	35599	FALSE
AA10_GT2_Glyco_tranf_2_3	AA10	GT2_Glyco_tranf_2_3	31	35896	FALSE
AA10_GT4	AA10	GT4	40	47516	FALSE
AA10_GT4	AA10	GT4	39	46321	FALSE
AA10_GT4	AA10	GT4	32	36708	FALSE
AA10_GT4	AA10	GT4	40	47516	FALSE
AA10_GT4	AA10	GT4	39	46321	FALSE
AA10_GT4	AA10	GT4	32	36708	FALSE
AA10_GT4	AA10	GT4	32	37101	FALSE
AA10_GT4	AA10	GT4	39	46654	FALSE
AA10_GT4	AA10	GT4	40	47837	FALSE
AA10_GT4	AA10	GT4	41	49174	FALSE
AA2_AA3_1	AA2	AA3_1	98	106976	FALSE
AA2_AA4	AA2	AA4	201	231697	FALSE
AA2_GH1	AA2	GH1	57	67381	FALSE
AA2_GH1	AA2	GH1	57	68134	FALSE
AA2_GH1	AA2	GH1	57	68134	FALSE
AA2_GH36	AA2	GH36	87	94134	FALSE
AA2_GH36	AA2	GH36	87	93700	FALSE
AA2_GT2_Glyco_tranf_2_3	AA2	GT2_Glyco_tranf_2_3	134	148786	FALSE
AA2_GT2_Glyco_tranf_2_3	AA2	GT2_Glyco_tranf_2_3	134	147347	FALSE
AA2_GT2_Glycos_transf_2	AA2	GT2_Glycos_transf_2	28	28984	FALSE
AA2_GT4	AA2	GT4	114	127561	FALSE
AA2_PL22	AA2	PL22	77	86575	FALSE
AA2_PL22	AA2	PL22	77	86575	FALSE
AA2_PL38	AA2	PL38	11	13039	FALSE
AA2_PL38	AA2	PL38	11	13960	FALSE
AA2_PL38	AA2	PL38	11	13960	FALSE
AA2_PL6_1	AA2	PL6_1	14	20111	FALSE
AA2_PL6_1	AA2	PL6_1	14	20675	FALSE
AA2_PL6_1	AA2	PL6_1	14	20675	FALSE
AA2_PL7_1	AA2	PL7_1	20	23205	FALSE
AA2_PL7_1	AA2	PL7_1	20	22368	FALSE
AA2_PL7_3	AA2	PL7_3	1	1195	FALSE
AA2_PL7_3	AA2	PL7_3	1	2305	FALSE
AA2_PL7_3	AA2	PL7_3	1	2305	FALSE
AA2_S1_13	AA2	S1_13	59	70857	FALSE
AA2_S1_13	AA2	S1_13	59	71490	FALSE
AA2_S1_13	AA2	S1_13	59	71490	FALSE
AA3_1_GH1	AA3_1	GH1	41	38842	FALSE
AA3_1_GH18	AA3_1	GH18	34	38909	FALSE
AA3_1_GH18	AA3_1	GH18	34	38504	FALSE
AA3_1_GH2	AA3_1	GH2	264	283882	FALSE
AA3_1_GH2	AA3_1	GH2	264	284590	FALSE
AA3_1_GH20	AA3_1	GH20	108	120828	FALSE
AA3_1_GH20	AA3_1	GH20	108	121581	FALSE
AA3_1_GH32	AA3_1	GH32	285	312451	FALSE
AA3_1_GH32	AA3_1	GH32	48	49958	FALSE
AA3_1_GH32	AA3_1	GH32	48	49958	FALSE
AA3_1_GH38	AA3_1	GH38	90	103981	FALSE
AA3_1_GH38	AA3_1	GH38	90	104920	FALSE
AA3_1_GT2_Glyco_tranf_2_3	AA3_1	GT2_Glyco_tranf_2_3	85	98648	FALSE
AA3_1_GT2_Glyco_tranf_2_3	AA3_1	GT2_Glyco_tranf_2_3	85	98548	FALSE
AA3_1_GT2_Glyco_tranf_2_3	AA3_1	GT2_Glyco_tranf_2_3	84	99052	FALSE
AA3_1_GT4	AA3_1	GT4	94	110565	FALSE
AA3_1_GT4	AA3_1	GT4	93	109370	FALSE
AA3_1_GT4	AA3_1	GT4	86	99757	FALSE
AA3_1_GT4	AA3_1	GT4	94	110465	FALSE
AA3_1_GT4	AA3_1	GT4	93	109270	FALSE
AA3_1_GT4	AA3_1	GT4	86	99657	FALSE
AA3_1_GT4	AA3_1	GT4	16	20585	FALSE
AA3_1_GT4	AA3_1	GT4	85	100257	FALSE
AA3_1_GT4	AA3_1	GT4	92	109810	FALSE
AA3_1_GT4	AA3_1	GT4	93	110993	FALSE
AA3_1_GT4	AA3_1	GT4	94	112330	FALSE
AA3_1_PL22	AA3_1	PL22	21	20401	FALSE
AA3_1_PL38	AA3_1	PL38	87	93016	FALSE
AA3_1_PL6_1	AA3_1	PL6_1	84	86301	FALSE
AA3_1_PL7_3	AA3_1	PL7_3	97	104671	FALSE
AA3_1_S1_13	AA3_1	S1_13	101	126989	FALSE
AA3_1_S1_13	AA3_1	S1_13	98	121981	FALSE
AA3_1_S1_13	AA3_1	S1_13	97	120088	FALSE
AA3_1_S1_13	AA3_1	S1_13	95	120080	FALSE
AA3_1_S1_13	AA3_1	S1_13	96	121991	FALSE
AA3_1_S1_13	AA3_1	S1_13	99	127029	FALSE
AA3_1_S1_13	AA3_1	S1_13	39	35486	FALSE
AA3_1_S1_13	AA3_1	S1_13	97	121838	FALSE
AA3_1_S1_13	AA3_1	S1_13	96	119945	FALSE
AA4_GH1	AA4	GH1	258	299078	FALSE
AA4_GH36	AA4	GH36	114	137563	FALSE
AA4_GT2_Glyco_tranf_2_3	AA4	GT2_Glyco_tranf_2_3	67	82911	FALSE
AA4_GT2_Glyco_tranf_2_3	AA4	GT2_Glyco_tranf_2_3	66	82911	FALSE
AA4_PL38	AA4	PL38	212	244736	FALSE
AA4_PL6_1	AA4	PL6_1	215	251808	FALSE
AA4_PL7_1	AA4	PL7_1	181	208492	FALSE
AA4_PL7_3	AA4	PL7_3	202	232892	FALSE
AA4_S1_13	AA4	S1_13	260	302554	FALSE
AA6_GH102	AA6	GH102	89	92272	FALSE
AA6_GH102	AA6	GH102	89	92812	FALSE
AA6_GH102	AA6	GH102	90	92272	FALSE
AA6_GH18	AA6	GH18	60	63145	FALSE
AA6_GH18	AA6	GH18	60	65113	FALSE
AA6_GH18	AA6	GH18	61	63145	FALSE
AA6_GH2	AA6	GH2	125	142291	FALSE
AA6_GH2	AA6	GH2	125	144817	FALSE
AA6_GH2	AA6	GH2	126	142291	FALSE
AA6_GH20	AA6	GH20	216	249656	FALSE
AA6_GH23	AA6	GH23	111	124146	FALSE
AA6_GH23	AA6	GH23	147	166417	FALSE
AA6_GH23	AA6	GH23	111	124686	FALSE
AA6_GH23	AA6	GH23	112	124146	FALSE
AA6_GH23	AA6	GH23	148	166417	FALSE
AA6_GH32	AA6	GH32	121	137661	FALSE
AA6_GH37	AA6	GH37	129	148915	FALSE
AA6_GH37	AA6	GH37	129	150715	FALSE
AA6_GH37	AA6	GH37	130	148915	FALSE
AA6_GH4	AA6	GH4	19	14324	FALSE
AA6_GH50	AA6	GH50	22	33934	FALSE
AA6_GH50	AA6	GH50	23	35985	FALSE
AA6_GH65	AA6	GH65	117	132878	FALSE
AA6_GH78	AA6	GH78	217	251662	FALSE
AA6_GH9	AA6	GH9	214	247015	FALSE
AA6_GT19	AA6	GT19	27	30680	FALSE
AA6_GT19	AA6	GT19	27	31247	FALSE
AA6_GT19	AA6	GT19	27	30680	FALSE
AA6_GT83	AA6	GT83	5	5455	FALSE
AA7_GT4	AA7	GT4	10	8580	FALSE
CBM23_S1_54	CBM23	S1_54	1	1435	FALSE
CBM32_S1_11	CBM32	S1_11	1	1635	FALSE
CBM4_CE4	CBM4	CE4	3	2440	FALSE
CBM4_GH1	CBM4	GH1	12	19834	FALSE
CBM4_GH10	CBM4	GH10	14	22296	FALSE
CBM4_GH10	CBM4	GH10	2	1875	FALSE
CBM4_GH16_1	CBM4	GH16_1	1	968	FALSE
CBM4_GH16_14	CBM4	GH16_14	2	2995	FALSE
CBM4_GH16_21	CBM4	GH16_21	1	954	FALSE
CBM4_GH30_1	CBM4	GH30_1	13	21099	FALSE
CBM6_GH117	CBM6	GH117	21	31750	FALSE
CBM6_GH136	CBM6	GH136	9	15256	FALSE
CBM6_GH136	CBM6	GH136	4	8366	FALSE
CBM6_GH141	CBM6	GH141	3	5328	FALSE
CBM6_GH141	CBM6	GH141	3	5328	FALSE
CBM6_GH150	CBM6	GH150	1	1343	FALSE
CBM6_GH150	CBM6	GH150	1	1343	FALSE
CBM6_GH150	CBM6	GH150	1	1343	FALSE
CBM6_GH16_11	CBM6	GH16_11	7	11676	FALSE
CBM6_GH16_11	CBM6	GH16_11	7	11676	FALSE
CBM6_GH16_11	CBM6	GH16_11	1	1276	FALSE
CBM6_GH16_11	CBM6	GH16_11	18	21982	FALSE
CBM6_GH16_11	CBM6	GH16_11	8	12799	FALSE
CBM6_GH16_11	CBM6	GH16_11	18	21982	FALSE
CBM6_GH167	CBM6	GH167	12	21525	FALSE
CBM6_GH167	CBM6	GH167	12	21525	FALSE
CBM6_GH167	CBM6	GH167	5	12670	FALSE
CBM6_GH2	CBM6	GH2	13	24158	FALSE
CBM6_GH2	CBM6	GH2	13	24158	FALSE
CBM6_GH2	CBM6	GH2	2	2182	FALSE
CBM6_GH2	CBM6	GH2	17	19444	FALSE
CBM6_GH2	CBM6	GH2	2	2182	FALSE
CBM6_GH2	CBM6	GH2	17	19444	FALSE
CBM6_GH29	CBM6	GH29	6	11473	FALSE
CBM6_GH33	CBM6	GH33	1	2712	FALSE
CBM6_GH33	CBM6	GH33	1	2784	FALSE
CBM6_GH33	CBM6	GH33	1	2784	FALSE
CBM6_GH33	CBM6	GH33	1	2712	FALSE
CBM6_GH43_1	CBM6	GH43_1	1	1831	FALSE
CBM6_GH43_1	CBM6	GH43_1	1	1363	FALSE
CBM6_GH43_1	CBM6	GH43_1	1	1831	FALSE
CBM6_GH43_1	CBM6	GH43_1	1	689	FALSE
CBM6_GH43_10	CBM6	GH43_10	4	11312	FALSE
CBM6_GH86	CBM6	GH86	5	9461	FALSE
CBM6_GH86	CBM6	GH86	5	9461	FALSE
CBM6_GT2_Glyco_tranf_2_3	CBM6	GT2_Glyco_tranf_2_3	12	15195	FALSE
CBM6_GT2_Glyco_tranf_2_3	CBM6	GT2_Glyco_tranf_2_3	18	20672	FALSE
CBM6_GT2_Glyco_tranf_2_3	CBM6	GT2_Glyco_tranf_2_3	12	15195	FALSE
CBM6_GT2_Glyco_tranf_2_3	CBM6	GT2_Glyco_tranf_2_3	18	20672	FALSE
CBM6_S1_15	CBM6	S1_15	5	9960	FALSE
CBM6_S1_17	CBM6	S1_17	5	7795	FALSE
CBM6_S1_20	CBM6	S1_20	2	3676	FALSE
CBM6_S1_72	CBM6	S1_72	2	4643	FALSE
CBM6_S1_72	CBM6	S1_72	2	4643	FALSE
CBM69_CE1	CBM69	CE1	175	196268	FALSE
CBM69_CE1	CBM69	CE1	172	196268	FALSE
CBM69_CE1	CBM69	CE1	173	196559	FALSE
CBM69_GH13_1	CBM69	GH13_1	1	608	FALSE
CBM69_GH13_1	CBM69	GH13_1	40	52830	FALSE
CBM69_GH13_1	CBM69	GH13_1	78	95832	FALSE
CBM69_GH13_1	CBM69	GH13_1	1	608	FALSE
CBM69_GH13_1	CBM69	GH13_1	40	52830	FALSE
CBM69_GH13_1	CBM69	GH13_1	77	95832	FALSE
CBM69_GH13_1	CBM69	GH13_1	77	97971	FALSE
CBM69_GH13_1	CBM69	GH13_1	40	54372	FALSE
CBM69_GH13_1	CBM69	GH13_1	1	1712	FALSE
CBM69_GH13_10	CBM69	GH13_10	38	49580	FALSE
CBM69_GH13_10	CBM69	GH13_10	38	49580	FALSE
CBM69_GH13_10	CBM69	GH13_10	38	51290	FALSE
CBM69_GH13_10	CBM69	GH13_10	3	3336	FALSE
CBM69_GH73	CBM69	GH73	183	205393	FALSE
CBM69_GH73	CBM69	GH73	180	205393	FALSE
CBM69_GH77	CBM69	GH77	37	47173	FALSE
CBM69_GH77	CBM69	GH77	37	47173	FALSE
CBM69_GH77	CBM69	GH77	37	48835	FALSE
CBM69_GH92	CBM69	GH92	160	172236	FALSE
CBM69_GH92	CBM69	GH92	161	174806	FALSE
CBM69_GH92	CBM69	GH92	162	177335	FALSE
CBM69_GH92	CBM69	GH92	163	180088	FALSE
CBM69_GH92	CBM69	GH92	164	182642	FALSE
CBM69_GH92	CBM69	GH92	157	172236	FALSE
CBM69_GH92	CBM69	GH92	158	174806	FALSE
CBM69_GH92	CBM69	GH92	159	177335	FALSE
CBM69_GH92	CBM69	GH92	160	180088	FALSE
CBM69_GH92	CBM69	GH92	161	182642	FALSE
CBM69_GH92	CBM69	GH92	162	184955	FALSE
CBM69_GH92	CBM69	GH92	161	181996	FALSE
CBM69_GH92	CBM69	GH92	160	179570	FALSE
CBM69_GH92	CBM69	GH92	159	176744	FALSE
CBM69_GH92	CBM69	GH92	158	174198	FALSE
CBM69_GT35	CBM69	GT35	36	44602	FALSE
CBM69_GT35	CBM69	GT35	36	44602	FALSE
CBM69_GT35	CBM69	GT35	36	46537	FALSE
CBM69_GT51	CBM69	GT51	39	51975	FALSE
CBM69_GT51	CBM69	GT51	39	51975	FALSE
CBM69_GT51	CBM69	GT51	39	52131	FALSE
CBM9_GH105	CBM9	GH105	1	790	FALSE
CBM9_GH105	CBM9	GH105	1	1108	FALSE
CBM9_GH154	CBM9	GH154	2	1522	FALSE
CBM9_GH92	CBM9	GH92	3	4458	FALSE
CBM9_PL8_1	CBM9	PL8_1	8	8520	FALSE
CE1_CE4	CE1	CE4	138	160024	FALSE
CE1_GH1	CE1	GH1	13	13654	FALSE
CE1_GH1	CE1	GH1	13	13654	FALSE
CE1_GH1	CE1	GH1	13	13144	FALSE
CE1_GH13_1	CE1	GH13_1	174	195660	FALSE
CE1_GH13_1	CE1	GH13_1	135	143438	FALSE
CE1_GH13_1	CE1	GH13_1	97	100436	FALSE
CE1_GH13_1	CE1	GH13_1	171	195660	FALSE
CE1_GH13_1	CE1	GH13_1	132	143438	FALSE
CE1_GH13_1	CE1	GH13_1	95	100436	FALSE
CE1_GH13_1	CE1	GH13_1	96	98588	FALSE
CE1_GH13_1	CE1	GH13_1	133	142187	FALSE
CE1_GH13_1	CE1	GH13_1	172	194847	FALSE
CE1_GH13_10	CE1	GH13_10	137	146688	FALSE
CE1_GH13_10	CE1	GH13_10	134	146688	FALSE
CE1_GH13_10	CE1	GH13_10	135	145269	FALSE
CE1_GH13_10	CE1	GH13_10	176	199895	FALSE
CE1_GH144	CE1	GH144	2	2649	FALSE
CE1_GH144	CE1	GH144	2	2649	FALSE
CE1_GH18	CE1	GH18	23	24017	FALSE
CE1_GH2	CE1	GH2	5	11328	FALSE
CE1_GH2	CE1	GH2	5	11328	FALSE
CE1_GH23	CE1	GH23	87	102442	FALSE
CE1_GH43_10	CE1	GH43_10	1	1850	FALSE
CE1_GH43_10	CE1	GH43_10	1	833	FALSE
CE1_GH43_10	CE1	GH43_10	1	833	FALSE
CE1_GH63	CE1	GH63	27	29458	FALSE
CE1_GH63	CE1	GH63	27	29458	FALSE
CE1_GH73	CE1	GH73	8	9125	FALSE
CE1_GH73	CE1	GH73	8	9125	FALSE
CE1_GH73	CE1	GH73	2	1663	FALSE
CE1_GH73	CE1	GH73	2	2852	FALSE
CE1_GH73	CE1	GH73	2	2852	FALSE
CE1_GH77	CE1	GH77	138	149095	FALSE
CE1_GH77	CE1	GH77	135	149095	FALSE
CE1_GH77	CE1	GH77	136	147724	FALSE
CE1_GH88	CE1	GH88	7	7422	FALSE
CE1_GH88	CE1	GH88	7	7422	FALSE
CE1_GH92	CE1	GH92	15	24032	FALSE
CE1_GH92	CE1	GH92	14	21462	FALSE
CE1_GH92	CE1	GH92	13	18933	FALSE
CE1_GH92	CE1	GH92	12	16180	FALSE
CE1_GH92	CE1	GH92	11	13626	FALSE
CE1_GH92	CE1	GH92	15	24032	FALSE
CE1_GH92	CE1	GH92	14	21462	FALSE
CE1_GH92	CE1	GH92	13	18933	FALSE
CE1_GH92	CE1	GH92	12	16180	FALSE
CE1_GH92	CE1	GH92	11	13626	FALSE
CE1_GH92	CE1	GH92	11	11604	FALSE
CE1_GH92	CE1	GH92	12	14563	FALSE
CE1_GH92	CE1	GH92	13	16989	FALSE
CE1_GH92	CE1	GH92	14	19815	FALSE
CE1_GH92	CE1	GH92	15	22361	FALSE
CE1_GT2_Glyco_tranf_2_2	CE1	GT2_Glyco_tranf_2_2	160	178293	FALSE
CE1_GT2_Glyco_tranf_2_2	CE1	GT2_Glyco_tranf_2_2	159	177307	FALSE
CE1_GT2_Glyco_tranf_2_3	CE1	GT2_Glyco_tranf_2_3	10	12847	FALSE
CE1_GT2_Glycos_transf_2	CE1	GT2_Glycos_transf_2	38	38903	FALSE
CE1_GT2_Glycos_transf_2	CE1	GT2_Glycos_transf_2	37	38139	FALSE
CE1_GT2_Glycos_transf_2	CE1	GT2_Glycos_transf_2	11	16205	FALSE
CE1_GT2_Glycos_transf_2	CE1	GT2_Glycos_transf_2	161	179261	FALSE
CE1_GT2_Glycos_transf_2	CE1	GT2_Glycos_transf_2	158	176372	FALSE
CE1_GT2_Glycos_transf_2	CE1	GT2_Glycos_transf_2	150	170134	FALSE
CE1_GT2_Glycos_transf_2	CE1	GT2_Glycos_transf_2	11	16205	FALSE
CE1_GT2_Glycos_transf_2	CE1	GT2_Glycos_transf_2	4	3812	FALSE
CE1_GT25	CE1	GT25	53	54596	FALSE
CE1_GT30	CE1	GT30	51	52824	FALSE
CE1_GT35	CE1	GT35	139	151666	FALSE
CE1_GT35	CE1	GT35	136	151666	FALSE
CE1_GT35	CE1	GT35	137	150022	FALSE
CE1_GT4	CE1	GT4	15	18898	FALSE
CE1_GT4	CE1	GT4	13	16353	FALSE
CE1_GT4	CE1	GT4	11	14079	FALSE
CE1_GT41	CE1	GT41	6	12367	FALSE
CE1_GT51	CE1	GT51	136	144293	FALSE
CE1_GT51	CE1	GT51	133	144293	FALSE
CE1_GT51	CE1	GT51	134	144428	FALSE
CE1_GT9	CE1	GT9	52	53873	FALSE
CE1_GT9	CE1	GT9	39	40011	FALSE
CE1_GT90	CE1	GT90	36	37307	FALSE
CE1_S1_11	CE1	S1_11	1	1735	FALSE
CE1_S1_20	CE1	S1_20	1	1747	FALSE
CE12_CE8	CE12	CE8	7	17672	FALSE
CE12_GH105	CE12	GH105	8	19303	FALSE
CE12_GH28	CE12	GH28	4	6242	FALSE
CE12_GH28	CE12	GH28	2	3852	FALSE
CE12_GH43_10	CE12	GH43_10	3	4651	FALSE
CE12_PL1	CE12	PL1	1	1996	FALSE
CE12_PL10_1	CE12	PL10_1	5	7334	FALSE
CE14_GH109	CE14	GH109	9	9817	FALSE
CE14_GH16_14	CE14	GH16_14	34	45699	FALSE
CE14_GH31	CE14	GH31	3	5731	FALSE
CE14_GH31	CE14	GH31	47	58436	FALSE
CE14_GH31	CE14	GH31	3	5731	FALSE
CE14_GH35	CE14	GH35	30	38070	FALSE
CE16_GH13_1	CE16	GH13_1	290	329575	FALSE
CE16_GH13_1	CE16	GH13_1	289	329575	FALSE
CE16_GH23	CE16	GH23	34	36383	FALSE
CE16_GH23	CE16	GH23	34	35759	FALSE
CE16_GH23	CE16	GH23	34	36383	FALSE
CE16_GH32	CE16	GH32	2	2293	FALSE
CE16_GT4	CE16	GT4	244	287403	FALSE
CE16_GT4	CE16	GT4	247	290536	FALSE
CE16_GT4	CE16	GT4	247	290332	FALSE
CE16_GT4	CE16	GT4	244	287178	FALSE
CE16_GT4	CE16	GT4	245	287403	FALSE
CE16_GT4	CE16	GT4	248	290536	FALSE
CE16_GT9	CE16	GT9	130	127914	FALSE
CE16_GT9	CE16	GT9	129	127707	FALSE
CE16_GT9	CE16	GT9	131	127914	FALSE
CE17_GH105	CE17	GH105	2	4185	FALSE
CE17_GH105	CE17	GH105	2	4030	FALSE
CE17_GH117	CE17	GH117	2	2261	FALSE
CE17_GH117	CE17	GH117	5	7899	FALSE
CE17_GH117	CE17	GH117	2	2261	FALSE
CE17_GH2	CE17	GH2	8	12989	FALSE
CE17_GH2	CE17	GH2	2	3100	FALSE
CE17_GH2	CE17	GH2	8	12680	FALSE
CE17_GH2	CE17	GH2	12	14740	FALSE
CE17_GH2	CE17	GH2	3	4210	FALSE
CE17_GH86	CE17	GH86	3	5732	FALSE
CE17_GH86	CE17	GH86	4	6281	FALSE
CE17_GH9	CE17	GH9	1	1657	FALSE
CE17_GT2_Glyco_tranf_2_3	CE17	GT2_Glyco_tranf_2_3	3	3961	FALSE
CE17_S1_19	CE17	S1_19	13	16268	FALSE
CE17_S1_25	CE17	S1_25	3	4555	FALSE
CE17_S1_27	CE17	S1_27	9	16488	FALSE
CE17_S1_27	CE17	S1_27	9	16179	FALSE
CE17_S1_8	CE17	S1_8	10	13139	FALSE
CE2_GH5_2	CE2	GH5_2	4	3764	FALSE
CE2_GH9	CE2	GH9	1	1817	FALSE
CE2_PL38	CE2	PL38	1	1401	FALSE
CE2_PL6_1	CE2	PL6_1	2	3809	FALSE
CE3_GH13_1	CE3	GH13_1	16	24151	FALSE
CE3_GH20	CE3	GH20	17	26027	FALSE
CE3_GH31	CE3	GH31	9	13839	FALSE
CE3_GH36	CE3	GH36	13	19574	FALSE
CE3_GT2_Glyco_tranf_2_3	CE3	GT2_Glyco_tranf_2_3	3	3748	FALSE
CE3_GT2_Glyco_tranf_2_3	CE3	GT2_Glyco_tranf_2_3	11	16247	FALSE
CE3_PL9_2	CE3	PL9_2	2	3538	FALSE
CE3_S1_29	CE3	S1_29	6	7248	FALSE
CE4_GH1	CE4	GH1	15	22274	FALSE
CE4_GH10	CE4	GH10	17	24736	FALSE
CE4_GH13_1	CE4	GH13_1	1	1798	FALSE
CE4_GH16_1	CE4	GH16_1	2	1472	FALSE
CE4_GH16_14	CE4	GH16_14	5	5435	FALSE
CE4_GH163	CE4	GH163	5	5800	FALSE
CE4_GH2	CE4	GH2	2	1876	FALSE
CE4_GH2	CE4	GH2	7	6246	FALSE
CE4_GH2	CE4	GH2	2	3147	FALSE
CE4_GH2	CE4	GH2	2	3046	FALSE
CE4_GH2	CE4	GH2	2	3016	FALSE
CE4_GH23	CE4	GH23	51	57582	FALSE
CE4_GH3	CE4	GH3	1	1239	FALSE
CE4_GH3	CE4	GH3	1	1143	FALSE
CE4_GH3	CE4	GH3	1	1113	FALSE
CE4_GH30_1	CE4	GH30_1	16	23539	FALSE
CE4_GH43_1	CE4	GH43_1	3	4094	FALSE
CE4_GH43_1	CE4	GH43_1	3	3990	FALSE
CE4_GH43_1	CE4	GH43_1	3	3960	FALSE
CE4_GT2_Glyco_tranf_2_2	CE4	GT2_Glyco_tranf_2_2	22	18269	FALSE
CE4_GT2_Glyco_tranf_2_2	CE4	GT2_Glyco_tranf_2_2	21	17283	FALSE
CE4_GT2_Glyco_tranf_2_3	CE4	GT2_Glyco_tranf_2_3	21	24484	FALSE
CE4_GT2_Glycos_transf_2	CE4	GT2_Glycos_transf_2	6	5520	FALSE
CE4_GT2_Glycos_transf_2	CE4	GT2_Glycos_transf_2	3	2365	FALSE
CE4_GT2_Glycos_transf_2	CE4	GT2_Glycos_transf_2	23	19237	FALSE
CE4_GT2_Glycos_transf_2	CE4	GT2_Glycos_transf_2	20	16348	FALSE
CE4_GT2_Glycos_transf_2	CE4	GT2_Glycos_transf_2	12	10110	FALSE
CE4_GT2_Glycos_transf_2	CE4	GT2_Glycos_transf_2	127	143819	FALSE
CE4_GT2_Glycos_transf_2	CE4	GT2_Glycos_transf_2	3	1612	FALSE
CE4_GT2_Glycos_transf_2	CE4	GT2_Glycos_transf_2	2	1391	FALSE
CE4_GT2_Glycos_transf_2	CE4	GT2_Glycos_transf_2	3	2167	FALSE
CE4_GT2_Glycos_transf_2	CE4	GT2_Glycos_transf_2	3	2167	FALSE
CE6_GH10	CE6	GH10	3	4082	FALSE
CE6_GH10	CE6	GH10	2	2634	FALSE
CE6_GH10	CE6	GH10	1	1271	FALSE
CE6_GH10	CE6	GH10	1	1259	FALSE
CE6_GH43_10	CE6	GH43_10	2	2561	FALSE
CE6_PL40	CE6	PL40	4	3746	FALSE
CE6_S1_17	CE6	S1_17	1	1931	FALSE
CE6_S1_28	CE6	S1_28	2	3543	FALSE
CE6_S1_9	CE6	S1_9	1	1479	FALSE
CE7_CE7	CE7	CE7	1	1341	TRUE
CE7_GH130	CE7	GH130	6	10925	FALSE
CE7_GH2	CE7	GH2	3	4071	FALSE
CE7_GH26	CE7	GH26	5	9749	FALSE
CE7_GH26	CE7	GH26	7	11693	FALSE
CE8_GH105	CE8	GH105	1	1631	FALSE
CE8_GH28	CE8	GH28	11	23914	FALSE
CE8_GH28	CE8	GH28	9	21524	FALSE
CE8_GH43_10	CE8	GH43_10	10	22323	FALSE
CE8_PL1	CE8	PL1	8	19668	FALSE
CE8_PL10_1	CE8	PL10_1	12	25006	FALSE
CE9_GH103	CE9	GH103	12	15517	FALSE
CE9_GH103	CE9	GH103	12	15518	FALSE
CE9_GH20	CE9	GH20	69	67499	FALSE
CE9_GH20	CE9	GH20	2	3029	FALSE
CE9_GH20	CE9	GH20	2	3029	FALSE
CE9_GH20	CE9	GH20	5	5820	FALSE
CE9_GH73	CE9	GH73	43	42581	FALSE
CE9_GH73	CE9	GH73	41	42371	FALSE
CE9_GT4	CE9	GT4	15	17353	FALSE
CE9_GT4	CE9	GT4	8	8708	FALSE
CE9_GT4	CE9	GT4	7	7339	FALSE
GH1_GH10	GH1	GH10	2	2462	FALSE
GH1_GH13_1	GH1	GH13_1	11	13092	FALSE
GH1_GH13_10	GH1	GH13_10	10	11124	FALSE
GH1_GH16_1	GH1	GH16_1	13	20802	FALSE
GH1_GH16_14	GH1	GH16_14	10	16839	FALSE
GH1_GH18	GH1	GH18	10	10873	FALSE
GH1_GH30_1	GH1	GH30_1	1	1265	FALSE
GH1_GH36	GH1	GH36	144	161515	FALSE
GH1_GH36	GH1	GH36	144	161834	FALSE
GH1_GH38	GH1	GH38	2	3625	FALSE
GH1_GH63	GH1	GH63	40	43112	FALSE
GH1_GH63	GH1	GH63	40	43112	FALSE
GH1_GH77	GH1	GH77	6	10229	FALSE
GH1_GH94	GH1	GH94	1	1353	FALSE
GH1_GT2_Glyco_tranf_2_3	GH1	GT2_Glyco_tranf_2_3	191	216167	FALSE
GH1_GT2_Glyco_tranf_2_3	GH1	GT2_Glyco_tranf_2_3	191	215481	FALSE
GH1_GT2_Glycos_transf_2	GH1	GT2_Glycos_transf_2	17	18780	FALSE
GH1_GT2_Glycos_transf_2	GH1	GT2_Glycos_transf_2	5	5256	FALSE
GH1_GT35	GH1	GT35	5	7997	FALSE
GH1_GT4	GH1	GT4	57	59427	FALSE
GH1_GT4	GH1	GT4	7	6993	FALSE
GH1_GT5	GH1	GT5	17	17376	FALSE
GH1_PL22	GH1	PL22	20	18441	FALSE
GH1_PL22	GH1	PL22	20	18441	FALSE
GH1_PL38	GH1	PL38	46	54342	FALSE
GH1_PL38	GH1	PL38	46	54174	FALSE
GH1_PL38	GH1	PL38	46	54174	FALSE
GH1_PL6_1	GH1	PL6_1	43	47270	FALSE
GH1_PL6_1	GH1	PL6_1	43	47459	FALSE
GH1_PL6_1	GH1	PL6_1	43	47459	FALSE
GH1_PL7_1	GH1	PL7_1	77	90586	FALSE
GH1_PL7_1	GH1	PL7_1	77	90502	FALSE
GH1_PL7_3	GH1	PL7_3	56	66186	FALSE
GH1_PL7_3	GH1	PL7_3	56	65829	FALSE
GH1_PL7_3	GH1	PL7_3	56	65829	FALSE
GH1_S1_13	GH1	S1_13	2	3476	FALSE
GH1_S1_13	GH1	S1_13	2	3356	FALSE
GH1_S1_13	GH1	S1_13	2	3356	FALSE
GH10_GH10	GH10	GH10	1	1183	TRUE
GH10_GH10	GH10	GH10	11	21225	TRUE
GH10_GH10	GH10	GH10	6	12760	TRUE
GH10_GH10	GH10	GH10	11	21225	TRUE
GH10_GH10	GH10	GH10	6	12304	TRUE
GH10_GH10	GH10	GH10	1	1448	TRUE
GH10_GH10	GH10	GH10	2	2811	TRUE
GH10_GH10	GH10	GH10	4	5341	TRUE
GH10_GH10	GH10	GH10	1	1363	TRUE
GH10_GH10	GH10	GH10	3	3893	TRUE
GH10_GH10	GH10	GH10	2	2530	TRUE
GH10_GH10	GH10	GH10	1	1223	TRUE
GH10_GH10	GH10	GH10	11	21225	TRUE
GH10_GH10	GH10	GH10	6	12760	TRUE
GH10_GH10	GH10	GH10	6	12652	TRUE
GH10_GH10	GH10	GH10	7	13909	TRUE
GH10_GH10	GH10	GH10	1	1257	TRUE
GH10_GH10	GH10	GH10	1	1436	TRUE
GH10_GH10	GH10	GH10	1	1328	TRUE
GH10_GH10	GH10	GH10	2	2494	TRUE
GH10_GH10	GH10	GH10	1	1166	TRUE
GH10_GH10	GH10	GH10	1	1565	TRUE
GH10_GH10	GH10	GH10	2	2823	TRUE
GH10_GH10	GH10	GH10	1	1258	TRUE
GH10_GH10	GH10	GH10	1	1177	TRUE
GH10_GH10	GH10	GH10	1	1326	TRUE
GH10_GH16_1	GH10	GH16_1	1	917	FALSE
GH10_GH16_1	GH10	GH16_1	7	13677	FALSE
GH10_GH16_1	GH10	GH16_1	7	14118	FALSE
GH10_GH16_1	GH10	GH16_1	1	1814	FALSE
GH10_GH16_1	GH10	GH16_1	1	917	FALSE
GH10_GH16_1	GH10	GH16_1	7	13677	FALSE
GH10_GH16_1	GH10	GH16_1	15	23264	FALSE
GH10_GH16_14	GH10	GH16_14	12	19301	FALSE
GH10_GH16_21	GH10	GH16_21	1	921	FALSE
GH10_GH2	GH10	GH2	2	5092	FALSE
GH10_GH26	GH10	GH26	5	11933	FALSE
GH10_GH26	GH10	GH26	11	24237	FALSE
GH10_GH29	GH10	GH29	3	5142	FALSE
GH10_GH29	GH10	GH29	9	17794	FALSE
GH10_GH29	GH10	GH29	10	19051	FALSE
GH10_GH29	GH10	GH29	2	3605	FALSE
GH10_GH29	GH10	GH29	8	16257	FALSE
GH10_GH29	GH10	GH29	9	17514	FALSE
GH10_GH3	GH10	GH3	1	1233	FALSE
GH10_GH3	GH10	GH3	6	13098	FALSE
GH10_GH3	GH10	GH3	4	5085	FALSE
GH10_GH3	GH10	GH3	3	3649	FALSE
GH10_GH30_1	GH10	GH30_1	1	1197	FALSE
GH10_GH43_1	GH10	GH43_1	3	4039	FALSE
GH10_GH43_1	GH10	GH43_1	2	2603	FALSE
GH10_GH43_1	GH10	GH43_1	2	2478	FALSE
GH10_GH43_10	GH10	GH43_10	10	17531	FALSE
GH10_GH43_10	GH10	GH43_10	4	5227	FALSE
GH10_GH43_10	GH10	GH43_10	5	6643	FALSE
GH10_GH43_10	GH10	GH43_10	4	5195	FALSE
GH10_GH43_10	GH10	GH43_10	3	3832	FALSE
GH10_GH43_10	GH10	GH43_10	1	1302	FALSE
GH10_GH43_10	GH10	GH43_10	1	1732	FALSE
GH10_GH43_10	GH10	GH43_10	2	3168	FALSE
GH10_GH43_11	GH10	GH43_11	1	1896	FALSE
GH10_GH63	GH10	GH63	6	9668	FALSE
GH10_GH63	GH10	GH63	17	30893	FALSE
GH10_GH63	GH10	GH63	6	9662	FALSE
GH10_GH63	GH10	GH63	17	30887	FALSE
GH10_GH63	GH10	GH63	6	9662	FALSE
GH10_GH63	GH10	GH63	17	30887	FALSE
GH10_GH88	GH10	GH88	5	10548	FALSE
GH10_GT2_Glyco_tranf_2_3	GH10	GT2_Glyco_tranf_2_3	4	7660	FALSE
GH10_S1_11	GH10	S1_11	9	18439	FALSE
GH10_S1_11	GH10	S1_11	2	2786	FALSE
GH10_S1_11	GH10	S1_11	2	2517	FALSE
GH10_S1_11	GH10	S1_11	8	15277	FALSE
GH10_S1_11	GH10	S1_11	1	1111	FALSE
GH10_S1_16	GH10	S1_16	8	16968	FALSE
GH10_S1_16	GH10	S1_16	3	4257	FALSE
GH10_S1_16	GH10	S1_16	8	16968	FALSE
GH10_S1_16	GH10	S1_16	3	4257	FALSE
GH10_S1_16	GH10	S1_16	1	1245	FALSE
GH10_S1_16	GH10	S1_16	8	16968	FALSE
GH10_S1_16	GH10	S1_16	3	4257	FALSE
GH10_S1_16	GH10	S1_16	1	1245	FALSE
GH10_S1_43	GH10	S1_43	1	1154	FALSE
GH10_S1_7	GH10	S1_7	14	28022	FALSE
GH10_S1_7	GH10	S1_7	3	6797	FALSE
GH10_S1_7	GH10	S1_7	14	28022	FALSE
GH10_S1_7	GH10	S1_7	3	6797	FALSE
GH10_S1_7	GH10	S1_7	2	2743	FALSE
GH10_S1_7	GH10	S1_7	3	4020	FALSE
GH10_S1_7	GH10	S1_7	2	2797	FALSE
GH10_S1_7	GH10	S1_7	14	28022	FALSE
GH10_S1_7	GH10	S1_7	3	6797	FALSE
GH10_S1_7	GH10	S1_7	2	2743	FALSE
GH10_S1_7	GH10	S1_7	2	3086	FALSE
GH10_S1_7	GH10	S1_7	6	11769	FALSE
GH10_S1_7	GH10	S1_7	4	7412	FALSE
GH10_S1_8	GH10	S1_8	1	1546	FALSE
GH10_S1_8	GH10	S1_8	12	22771	FALSE
GH10_S1_8	GH10	S1_8	1	1546	FALSE
GH10_S1_8	GH10	S1_8	12	22771	FALSE
GH10_S1_8	GH10	S1_8	1	1546	FALSE
GH10_S1_8	GH10	S1_8	12	22771	FALSE
GH102_GH18	GH102	GH18	29	29127	FALSE
GH102_GH18	GH102	GH18	29	27699	FALSE
GH102_GH18	GH102	GH18	29	29127	FALSE
GH102_GH2	GH102	GH2	36	50019	FALSE
GH102_GH2	GH102	GH2	36	52005	FALSE
GH102_GH2	GH102	GH2	36	50019	FALSE
GH102_GH20	GH102	GH20	127	157384	FALSE
GH102_GH23	GH102	GH23	22	31874	FALSE
GH102_GH23	GH102	GH23	58	74145	FALSE
GH102_GH23	GH102	GH23	22	31874	FALSE
GH102_GH23	GH102	GH23	22	31874	FALSE
GH102_GH23	GH102	GH23	58	74145	FALSE
GH102_GH37	GH102	GH37	40	56643	FALSE
GH102_GH37	GH102	GH37	40	57903	FALSE
GH102_GH37	GH102	GH37	40	56643	FALSE
GH102_GH4	GH102	GH4	108	107136	FALSE
GH102_GH78	GH102	GH78	128	159390	FALSE
GH102_GH9	GH102	GH9	125	154743	FALSE
GH102_GT19	GH102	GT19	62	61592	FALSE
GH102_GT19	GH102	GT19	62	61565	FALSE
GH102_GT19	GH102	GT19	63	61592	FALSE
GH105_GH105	GH105	GH105	5	10417	TRUE
GH105_GH106	GH105	GH106	7	14164	FALSE
GH105_GH106	GH105	GH106	2	3747	FALSE
GH105_GH110	GH105	GH110	8	14669	FALSE
GH105_GH117	GH105	GH117	4	6446	FALSE
GH105_GH117	GH105	GH117	4	6291	FALSE
GH105_GH154	GH105	GH154	3	2630	FALSE
GH105_GH16_11	GH105	GH16_11	1	2529	FALSE
GH105_GH16_11	GH105	GH16_11	10	16447	FALSE
GH105_GH16_11	GH105	GH16_11	15	26864	FALSE
GH105_GH2	GH105	GH2	4	11454	FALSE
GH105_GH2	GH105	GH2	3	8388	FALSE
GH105_GH2	GH105	GH2	6	8804	FALSE
GH105_GH2	GH105	GH2	2	5014	FALSE
GH105_GH2	GH105	GH2	7	11607	FALSE
GH105_GH2	GH105	GH2	12	22024	FALSE
GH105_GH2	GH105	GH2	2	5014	FALSE
GH105_GH2	GH105	GH2	3	5403	FALSE
GH105_GH2	GH105	GH2	6	8650	FALSE
GH105_GH27	GH105	GH27	1	1650	FALSE
GH105_GH28	GH105	GH28	12	25545	FALSE
GH105_GH28	GH105	GH28	10	23155	FALSE
GH105_GH29	GH105	GH29	6	8453	FALSE
GH105_GH29	GH105	GH29	1	1136	FALSE
GH105_GH29	GH105	GH29	6	8453	FALSE
GH105_GH29	GH105	GH29	11	18870	FALSE
GH105_GH39	GH105	GH39	4	8330	FALSE
GH105_GH43_10	GH105	GH43_10	11	23954	FALSE
GH105_GH63	GH105	GH63	2	2644	FALSE
GH105_GH86	GH105	GH86	16	22754	FALSE
GH105_GH86	GH105	GH86	4	6029	FALSE
GH105_GH86	GH105	GH86	4	6029	FALSE
GH105_GH86	GH105	GH86	9	16446	FALSE
GH105_GH95	GH105	GH95	1	2443	FALSE
GH105_GH95	GH105	GH95	1	2443	FALSE
GH105_GH95	GH105	GH95	4	7974	FALSE
GH105_PL1	GH105	PL1	9	21299	FALSE
GH105_PL10_1	GH105	PL10_1	13	26637	FALSE
GH105_PL42	GH105	PL42	1	1392	FALSE
GH105_PL8_1	GH105	PL8_1	7	7412	FALSE
GH105_S1_11	GH105	S1_11	1	1699	FALSE
GH105_S1_15	GH105	S1_15	5	10092	FALSE
GH105_S1_15	GH105	S1_15	10	11732	FALSE
GH105_S1_15	GH105	S1_15	2	3264	FALSE
GH105_S1_27	GH105	S1_27	7	12303	FALSE
GH105_S1_27	GH105	S1_27	7	12149	FALSE
GH105_S1_7	GH105	S1_7	6	12733	FALSE
GH105_S1_7	GH105	S1_7	1	2316	FALSE
GH105_S1_72	GH105	S1_72	11	21534	FALSE
GH105_S1_8	GH105	S1_8	6	11663	FALSE
GH105_S1_8	GH105	S1_8	7	13126	FALSE
GH106_GH106	GH106	GH106	1	3187	TRUE
GH106_GH110	GH106	GH110	4	8031	FALSE
GH106_GH115	GH106	GH115	1	4042	FALSE
GH106_GH127	GH106	GH127	3	5749	FALSE
GH106_GH127	GH106	GH127	1	3173	FALSE
GH106_GH136	GH106	GH136	11	13610	FALSE
GH106_GH16_11	GH106	GH16_11	17	30611	FALSE
GH106_GH2	GH106	GH2	10	10989	FALSE
GH106_GH2	GH106	GH2	5	10929	FALSE
GH106_GH2	GH106	GH2	3	5986	FALSE
GH106_GH2	GH106	GH2	14	25771	FALSE
GH106_GH2	GH106	GH2	5	9150	FALSE
GH106_GH28	GH106	GH28	2	3279	FALSE
GH106_GH29	GH106	GH29	1	1562	FALSE
GH106_GH29	GH106	GH29	13	22617	FALSE
GH106_GH31	GH106	GH31	4	8800	FALSE
GH106_GH39	GH106	GH39	2	3491	FALSE
GH106_GH39	GH106	GH39	1	1960	FALSE
GH106_GH43_10	GH106	GH43_10	8	16027	FALSE
GH106_GH43_10	GH106	GH43_10	1	1365	FALSE
GH106_GH78	GH106	GH78	1	1913	FALSE
GH106_GH86	GH106	GH86	6	12987	FALSE
GH106_GH86	GH106	GH86	11	20193	FALSE
GH106_GH88	GH106	GH88	1	1246	FALSE
GH106_GH88	GH106	GH88	1	1246	FALSE
GH106_GH95	GH106	GH95	6	11721	FALSE
GH106_GT4	GH106	GT4	10	18516	FALSE
GH106_GT4	GH106	GT4	9	17227	FALSE
GH106_GT41	GH106	GT41	6	12307	FALSE
GH106_GT41	GH106	GT41	5	9120	FALSE
GH106_GT9	GH106	GT9	20	24547	FALSE
GH106_PL35	GH106	PL35	2	3046	FALSE
GH106_PL8_1	GH106	PL8_1	19	23371	FALSE
GH106_S1_27	GH106	S1_27	2	3708	FALSE
GH106_S1_7	GH106	S1_7	1	1431	FALSE
GH106_S1_8	GH106	S1_8	4	7131	FALSE
GH106_S1_8	GH106	S1_8	5	8647	FALSE
GH109_GH16_14	GH109	GH16_14	25	35882	FALSE
GH109_GH20	GH109	GH20	13	19713	FALSE
GH109_GH31	GH109	GH31	12	15548	FALSE
GH109_GH31	GH109	GH31	38	48619	FALSE
GH109_GH35	GH109	GH35	21	28253	FALSE
GH110_GH110	GH110	GH110	9	16432	TRUE
GH110_GH110	GH110	GH110	2	6395	TRUE
GH110_GH110	GH110	GH110	2	4291	TRUE
GH110_GH110	GH110	GH110	1	2148	TRUE
GH110_GH110	GH110	GH110	2	2406	TRUE
GH110_GH110	GH110	GH110	9	15649	TRUE
GH110_GH127	GH110	GH127	8	9992	FALSE
GH110_GH127	GH110	GH127	5	7706	FALSE
GH110_GH127	GH110	GH127	2	3325	FALSE
GH110_GH127	GH110	GH127	2	3325	FALSE
GH110_GH127	GH110	GH127	1	2282	FALSE
GH110_GH127	GH110	GH127	1	2139	FALSE
GH110_GH127	GH110	GH127	2	3541	FALSE
GH110_GH127	GH110	GH127	3	6493	FALSE
GH110_GH127	GH110	GH127	1	2202	FALSE
GH110_GH127	GH110	GH127	2	3325	FALSE
GH110_GH127	GH110	GH127	1	2204	FALSE
GH110_GH127	GH110	GH127	2	4352	FALSE
GH110_GH13_1	GH110	GH13_1	10	12514	FALSE
GH110_GH133	GH110	GH133	14	18785	FALSE
GH110_GH133	GH110	GH133	15	18671	FALSE
GH110_GH139	GH110	GH139	3	6335	FALSE
GH110_GH150	GH110	GH150	6	6455	FALSE
GH110_GH150	GH110	GH150	2	3491	FALSE
GH110_GH150	GH110	GH150	2	3494	FALSE
GH110_GH150	GH110	GH150	20	29004	FALSE
GH110_GH150	GH110	GH150	11	13355	FALSE
GH110_GH150	GH110	GH150	11	14583	FALSE
GH110_GH16_13	GH110	GH16_13	10	13804	FALSE
GH110_GH16_13	GH110	GH16_13	10	13036	FALSE
GH110_GH16_13	GH110	GH16_13	8	9182	FALSE
GH110_GH16_14	GH110	GH16_14	1	1144	FALSE
GH110_GH167	GH110	GH167	5	9873	FALSE
GH110_GH167	GH110	GH167	5	9873	FALSE
GH110_GH167	GH110	GH167	5	9873	FALSE
GH110_GH2	GH110	GH2	1	1836	FALSE
GH110_GH2	GH110	GH2	14	19329	FALSE
GH110_GH2	GH110	GH2	8	14098	FALSE
GH110_GH2	GH110	GH2	1	2334	FALSE
GH110_GH2	GH110	GH2	9	13222	FALSE
GH110_GH2	GH110	GH2	1	1807	FALSE
GH110_GH2	GH110	GH2	2	3771	FALSE
GH110_GH2	GH110	GH2	1	3634	FALSE
GH110_GH2	GH110	GH2	8	15518	FALSE
GH110_GH2	GH110	GH2	3	7595	FALSE
GH110_GH2	GH110	GH2	6	13434	FALSE
GH110_GH2	GH110	GH2	1	3633	FALSE
GH110_GH2	GH110	GH2	1	1880	FALSE
GH110_GH2	GH110	GH2	1	2220	FALSE
GH110_GH2	GH110	GH2	12	26123	FALSE
GH110_GH2	GH110	GH2	11	23057	FALSE
GH110_GH2	GH110	GH2	1	1880	FALSE
GH110_GH2	GH110	GH2	8	13314	FALSE
GH110_GH2	GH110	GH2	1	2335	FALSE
GH110_GH2	GH110	GH2	2	4223	FALSE
GH110_GH2	GH110	GH2	1	1813	FALSE
GH110_GH2	GH110	GH2	3	3982	FALSE
GH110_GH27	GH110	GH27	9	16319	FALSE
GH110_GH29	GH110	GH29	2	5611	FALSE
GH110_GH29	GH110	GH29	2	5611	FALSE
GH110_GH39	GH110	GH39	4	6339	FALSE
GH110_GH78	GH110	GH78	3	6118	FALSE
GH110_GH82	GH110	GH82	9	21132	FALSE
GH110_GH82	GH110	GH82	1	1472	FALSE
GH110_GH82	GH110	GH82	7	13035	FALSE
GH110_GH82	GH110	GH82	2	6333	FALSE
GH110_GH95	GH110	GH95	4	8991	FALSE
GH110_GH95	GH110	GH95	5	11229	FALSE
GH110_GH95	GH110	GH95	1	2212	FALSE
GH110_GT2_Glyco_tranf_2_3	GH110	GT2_Glyco_tranf_2_3	18	23397	FALSE
GH110_GT2_Glyco_tranf_2_3	GH110	GT2_Glyco_tranf_2_3	20	24107	FALSE
GH110_GT2_Glycos_transf_2	GH110	GT2_Glycos_transf_2	21	25078	FALSE
GH110_GT4	GH110	GT4	15	20041	FALSE
GH110_GT4	GH110	GT4	16	19927	FALSE
GH110_GT5	GH110	GT5	12	15164	FALSE
GH110_GT5	GH110	GT5	13	15050	FALSE
GH110_S1_15	GH110	S1_15	2	3019	FALSE
GH110_S1_15	GH110	S1_15	1	1560	FALSE
GH110_S1_15	GH110	S1_15	1	1560	FALSE
GH110_S1_15	GH110	S1_15	3	7955	FALSE
GH110_S1_15	GH110	S1_15	3	4577	FALSE
GH110_S1_15	GH110	S1_15	1	1929	FALSE
GH110_S1_15	GH110	S1_15	1	1926	FALSE
GH110_S1_15	GH110	S1_15	1	935	FALSE
GH110_S1_15	GH110	S1_15	1	1471	FALSE
GH110_S1_16	GH110	S1_16	3	4366	FALSE
GH110_S1_16	GH110	S1_16	1	1830	FALSE
GH110_S1_16	GH110	S1_16	1	1381	FALSE
GH110_S1_16	GH110	S1_16	3	7624	FALSE
GH110_S1_16	GH110	S1_16	1	1826	FALSE
GH110_S1_16	GH110	S1_16	1	1826	FALSE
GH110_S1_16	GH110	S1_16	1	1819	FALSE
GH110_S1_16	GH110	S1_16	1	1355	FALSE
GH110_S1_16	GH110	S1_16	1	1535	FALSE
GH110_S1_16	GH110	S1_16	1	1533	FALSE
GH110_S1_16	GH110	S1_16	1	1348	FALSE
GH110_S1_16	GH110	S1_16	1	1826	FALSE
GH110_S1_16	GH110	S1_16	1	1805	FALSE
GH110_S1_20	GH110	S1_20	10	22604	FALSE
GH110_S1_20	GH110	S1_20	1	2089	FALSE
GH110_S1_20	GH110	S1_20	1	2089	FALSE
GH110_S1_27	GH110	S1_27	2	4323	FALSE
GH110_S1_27	GH110	S1_27	2	3816	FALSE
GH110_S1_27	GH110	S1_27	3	5964	FALSE
GH110_S1_30	GH110	S1_30	3	5454	FALSE
GH110_S1_30	GH110	S1_30	3	5220	FALSE
GH110_S1_30	GH110	S1_30	3	5449	FALSE
GH110_S1_4	GH110	S1_4	4	8582	FALSE
GH110_S1_4	GH110	S1_4	2	4291	FALSE
GH110_S1_46	GH110	S1_46	3	4073	FALSE
GH110_S1_46	GH110	S1_46	1	1667	FALSE
GH110_S1_8	GH110	S1_8	8	19602	FALSE
GH110_S1_8	GH110	S1_8	2	4910	FALSE
GH110_S1_8	GH110	S1_8	11	19751	FALSE
GH110_S1_8	GH110	S1_8	2	3319	FALSE
GH110_S1_8	GH110	S1_8	2	3004	FALSE
GH110_S1_8	GH110	S1_8	1	1505	FALSE
GH110_S1_8	GH110	S1_8	1	1466	FALSE
GH110_S1_8	GH110	S1_8	1	1446	FALSE
GH110_S1_8	GH110	S1_8	6	11602	FALSE
GH110_S1_8	GH110	S1_8	2	6095	FALSE
GH110_S1_8	GH110	S1_8	8	15162	FALSE
GH110_S1_8	GH110	S1_8	9	16678	FALSE
GH110_S1_8	GH110	S1_8	2	3006	FALSE
GH110_S1_8	GH110	S1_8	1	1543	FALSE
GH110_S1_8	GH110	S1_8	11	18968	FALSE
GH110_S1_8	GH110	S1_8	21	32087	FALSE
GH110_S1_8	GH110	S1_8	2	3319	FALSE
GH110_S1_8	GH110	S1_8	12	16438	FALSE
GH110_S1_8	GH110	S1_8	3	7652	FALSE
GH110_S1_8	GH110	S1_8	2	3007	FALSE
GH110_S1_8	GH110	S1_8	3	7652	FALSE
GH115_GH117	GH115	GH117	3	4632	FALSE
GH115_GH16_11	GH115	GH16_11	23	23395	FALSE
GH115_GH16_11	GH115	GH16_11	1	1380	FALSE
GH115_GH2	GH115	GH2	1	3613	FALSE
GH115_GH28	GH115	GH28	3	7321	FALSE
GH115_GH43_1	GH115	GH43_1	6	10949	FALSE
GH115_GH67	GH115	GH67	1	348	FALSE
GH115_GH86	GH115	GH86	1	1940	FALSE
GH115_GH86	GH115	GH86	1	1907	FALSE
GH115_GH86	GH115	GH86	1	3686	FALSE
GH115_GT9	GH115	GT9	19	20505	FALSE
GH115_PL8_1	GH115	PL8_1	18	19329	FALSE
GH115_S1_24	GH115	S1_24	1	1859	FALSE
GH115_S1_24	GH115	S1_24	1	1859	FALSE
GH116_GH2	GH116	GH2	3	5962	FALSE
GH116_GH39	GH116	GH39	1	2721	FALSE
GH117_GH117	GH117	GH117	3	4389	TRUE
GH117_GH117	GH117	GH117	2	3231	TRUE
GH117_GH117	GH117	GH117	4	4474	TRUE
GH117_GH117	GH117	GH117	5	6113	TRUE
GH117_GH117	GH117	GH117	5	6191	TRUE
GH117_GH117	GH117	GH117	3	4634	TRUE
GH117_GH117	GH117	GH117	1	1104	TRUE
GH117_GH117	GH117	GH117	3	4634	TRUE
GH117_GH133	GH117	GH133	3	4286	FALSE
GH117_GH136	GH117	GH136	11	24591	FALSE
GH117_GH136	GH117	GH136	11	22713	FALSE
GH117_GH141	GH117	GH141	1	1935	FALSE
GH117_GH141	GH117	GH141	3	5803	FALSE
GH117_GH141	GH117	GH141	6	10437	FALSE
GH117_GH16_11	GH117	GH16_11	2	3420	FALSE
GH117_GH16_11	GH117	GH16_11	1	969	FALSE
GH117_GH16_11	GH117	GH16_11	5	7914	FALSE
GH117_GH16_11	GH117	GH16_11	6	9392	FALSE
GH117_GH16_11	GH117	GH16_11	3	4683	FALSE
GH117_GH16_11	GH117	GH16_11	4	6161	FALSE
GH117_GH16_11	GH117	GH16_11	8	17081	FALSE
GH117_GH16_11	GH117	GH16_11	7	15956	FALSE
GH117_GH16_11	GH117	GH16_11	14	20074	FALSE
GH117_GH16_11	GH117	GH16_11	7	15335	FALSE
GH117_GH16_11	GH117	GH16_11	8	17207	FALSE
GH117_GH16_11	GH117	GH16_11	1	861	FALSE
GH117_GH16_11	GH117	GH16_11	1	1410	FALSE
GH117_GH16_11	GH117	GH16_11	1	1180	FALSE
GH117_GH16_11	GH117	GH16_11	1	682	FALSE
GH117_GH16_11	GH117	GH16_11	2	3252	FALSE
GH117_GH16_11	GH117	GH16_11	3	3217	FALSE
GH117_GH16_14	GH117	GH16_14	1	1312	FALSE
GH117_GH167	GH117	GH167	9	10225	FALSE
GH117_GH2	GH117	GH2	7	16418	FALSE
GH117_GH2	GH117	GH2	10	20807	FALSE
GH117_GH2	GH117	GH2	4	5605	FALSE
GH117_GH2	GH117	GH2	1	1216	FALSE
GH117_GH2	GH117	GH2	8	11653	FALSE
GH117_GH2	GH117	GH2	6	8422	FALSE
GH117_GH2	GH117	GH2	1	1160	FALSE
GH117_GH2	GH117	GH2	1	2690	FALSE
GH117_GH2	GH117	GH2	1	2553	FALSE
GH117_GH2	GH117	GH2	8	7592	FALSE
GH117_GH2	GH117	GH2	1	1233	FALSE
GH117_GH2	GH117	GH2	1	2690	FALSE
GH117_GH2	GH117	GH2	27	30786	FALSE
GH117_GH2	GH117	GH2	1	1259	FALSE
GH117_GH2	GH117	GH2	10	15250	FALSE
GH117_GH2	GH117	GH2	1	3002	FALSE
GH117_GH2	GH117	GH2	3	4799	FALSE
GH117_GH2	GH117	GH2	1	1502	FALSE
GH117_GH2	GH117	GH2	4	6621	FALSE
GH117_GH2	GH117	GH2	3	6282	FALSE
GH117_GH2	GH117	GH2	2	4786	FALSE
GH117_GH2	GH117	GH2	1	1804	FALSE
GH117_GH2	GH117	GH2	1	1224	FALSE
GH117_GH2	GH117	GH2	27	30786	FALSE
GH117_GH2	GH117	GH2	10	14941	FALSE
GH117_GH2	GH117	GH2	1	1259	FALSE
GH117_GH2	GH117	GH2	1	1502	FALSE
GH117_GH2	GH117	GH2	4	8245	FALSE
GH117_GH2	GH117	GH2	2	4786	FALSE
GH117_GH2	GH117	GH2	1	550	FALSE
GH117_GH23	GH117	GH23	3	5648	FALSE
GH117_GH29	GH117	GH29	8	18160	FALSE
GH117_GH29	GH117	GH29	11	22549	FALSE
GH117_GH29	GH117	GH29	1	1904	FALSE
GH117_GH29	GH117	GH29	3	5635	FALSE
GH117_GH29	GH117	GH29	2	2328	FALSE
GH117_GH29	GH117	GH29	1	1527	FALSE
GH117_GH29	GH117	GH29	1	1315	FALSE
GH117_GH29	GH117	GH29	2	2328	FALSE
GH117_GH3	GH117	GH3	14	27093	FALSE
GH117_GH30_1	GH117	GH30_1	5	5393	FALSE
GH117_GH31	GH117	GH31	2	2313	FALSE
GH117_GH43_1	GH117	GH43_1	1	1450	FALSE
GH117_GH43_1	GH117	GH43_1	1	1450	FALSE
GH117_GH43_1	GH117	GH43_1	7	10695	FALSE
GH117_GH43_10	GH117	GH43_10	4	6507	FALSE
GH117_GH43_10	GH117	GH43_10	2	3276	FALSE
GH117_GH43_10	GH117	GH43_10	2	2834	FALSE
GH117_GH43_10	GH117	GH43_10	2	2834	FALSE
GH117_GH43_10	GH117	GH43_10	1	1116	FALSE
GH117_GH43_10	GH117	GH43_10	1	1467	FALSE
GH117_GH50	GH117	GH50	9	12830	FALSE
GH117_GH57	GH117	GH57	1	1492	FALSE
GH117_GH77	GH117	GH77	2	2560	FALSE
GH117_GH86	GH117	GH86	1	2236	FALSE
GH117_GH86	GH117	GH86	3	5467	FALSE
GH117_GH86	GH117	GH86	5	7811	FALSE
GH117_GH86	GH117	GH86	16	22289	FALSE
GH117_GH86	GH117	GH86	3	2911	FALSE
GH117_GH86	GH117	GH86	2	2167	FALSE
GH117_GH86	GH117	GH86	3	6758	FALSE
GH117_GH86	GH117	GH86	3	6758	FALSE
GH117_GT2_Glyco_tranf_2_3	GH117	GT2_Glyco_tranf_2_3	33	46945	FALSE
GH117_GT2_Glyco_tranf_2_3	GH117	GT2_Glyco_tranf_2_3	39	52422	FALSE
GH117_GT2_Glycos_transf_2	GH117	GT2_Glycos_transf_2	6	15982	FALSE
GH117_GT35	GH117	GT35	4	6610	FALSE
GH117_GT4	GH117	GT4	2	2883	FALSE
GH117_PL9_2	GH117	PL9_2	12	15907	FALSE
GH117_S1_11	GH117	S1_11	1	1113	FALSE
GH117_S1_11	GH117	S1_11	1	1578	FALSE
GH117_S1_11	GH117	S1_11	1	1595	FALSE
GH117_S1_15	GH117	S1_15	6	6980	FALSE
GH117_S1_15	GH117	S1_15	8	9501	FALSE
GH117_S1_15	GH117	S1_15	8	9828	FALSE
GH117_S1_16	GH117	S1_16	1	1153	FALSE
GH117_S1_17	GH117	S1_17	8	10990	FALSE
GH117_S1_19	GH117	S1_19	7	10216	FALSE
GH117_S1_19	GH117	S1_19	5	6985	FALSE
GH117_S1_19	GH117	S1_19	2	3087	FALSE
GH117_S1_19	GH117	S1_19	7	8060	FALSE
GH117_S1_19	GH117	S1_19	7	8267	FALSE
GH117_S1_19	GH117	S1_19	2	4168	FALSE
GH117_S1_19	GH117	S1_19	2	3211	FALSE
GH117_S1_19	GH117	S1_19	2	4369	FALSE
GH117_S1_24	GH117	S1_24	7	8826	FALSE
GH117_S1_27	GH117	S1_27	11	18749	FALSE
GH117_S1_27	GH117	S1_27	11	18440	FALSE
GH117_S1_28	GH117	S1_28	1	1737	FALSE
GH117_S1_72	GH117	S1_72	1	1306	FALSE
GH117_S1_8	GH117	S1_8	5	5240	FALSE
GH117_S1_8	GH117	S1_8	2	3364	FALSE
GH121_GH2	GH121	GH2	8	15308	FALSE
GH121_GH2	GH121	GH2	1	3155	FALSE
GH121_GH2	GH121	GH2	1	3155	FALSE
GH121_GH36	GH121	GH36	7	11849	FALSE
GH121_S1_15	GH121	S1_15	6	9403	FALSE
GH121_S1_15	GH121	S1_15	6	9403	FALSE
GH121_S1_16	GH121	S1_16	2	4743	FALSE
GH121_S1_16	GH121	S1_16	2	4743	FALSE
GH121_S1_19	GH121	S1_19	1	1648	FALSE
GH125_GH92	GH125	GH92	1	1560	FALSE
GH125_GH92	GH125	GH92	1	2314	FALSE
GH125_GH92	GH125	GH92	1	2314	FALSE
GH127_GH13_1	GH127	GH13_1	3	5458	FALSE
GH127_GH13_10	GH127	GH13_10	2	3466	FALSE
GH127_GH150	GH127	GH150	2	3537	FALSE
GH127_GH150	GH127	GH150	13	26415	FALSE
GH127_GH150	GH127	GH150	13	27312	FALSE
GH127_GH16_11	GH127	GH16_11	4	6627	FALSE
GH127_GH16_11	GH127	GH16_11	9	15588	FALSE
GH127_GH16_13	GH127	GH16_13	8	10479	FALSE
GH127_GH16_13	GH127	GH16_13	8	9495	FALSE
GH127_GH167	GH127	GH167	1	2317	FALSE
GH127_GH167	GH127	GH167	60	77303	FALSE
GH127_GH2	GH127	GH2	1	3230	FALSE
GH127_GH2	GH127	GH2	9	11799	FALSE
GH127_GH2	GH127	GH2	3	5497	FALSE
GH127_GH2	GH127	GH2	4	4569	FALSE
GH127_GH2	GH127	GH2	2	3550	FALSE
GH127_GH2	GH127	GH2	1	2037	FALSE
GH127_GH2	GH127	GH2	3	6720	FALSE
GH127_GH2	GH127	GH2	12	24086	FALSE
GH127_GH2	GH127	GH2	3	5761	FALSE
GH127_GH2	GH127	GH2	12	24392	FALSE
GH127_GH2	GH127	GH2	3	7773	FALSE
GH127_GH2	GH127	GH2	1	3252	FALSE
GH127_GH2	GH127	GH2	2	4619	FALSE
GH127_GH2	GH127	GH2	1	1890	FALSE
GH127_GH2	GH127	GH2	3	5751	FALSE
GH127_GH28	GH127	GH28	1	1958	FALSE
GH127_GH33	GH127	GH33	1	2718	FALSE
GH127_GH78	GH127	GH78	2	3836	FALSE
GH127_GH82	GH127	GH82	5	11671	FALSE
GH127_GH82	GH127	GH82	5	11017	FALSE
GH127_GH82	GH127	GH82	4	8242	FALSE
GH127_GT2_Glyco_tranf_2_3	GH127	GT2_Glyco_tranf_2_3	18	20566	FALSE
GH127_GT2_Glycos_transf_2	GH127	GT2_Glycos_transf_2	19	21537	FALSE
GH127_S1_14	GH127	S1_14	2	3032	FALSE
GH127_S1_15	GH127	S1_15	3	4687	FALSE
GH127_S1_16	GH127	S1_16	5	5626	FALSE
GH127_S1_16	GH127	S1_16	4	7143	FALSE
GH127_S1_16	GH127	S1_16	1	1414	FALSE
GH127_S1_16	GH127	S1_16	2	4003	FALSE
GH127_S1_16	GH127	S1_16	6	9536	FALSE
GH127_S1_16	GH127	S1_16	1	2048	FALSE
GH127_S1_16	GH127	S1_16	1	1438	FALSE
GH127_S1_16	GH127	S1_16	2	3248	FALSE
GH127_S1_16	GH127	S1_16	1	2035	FALSE
GH127_S1_16	GH127	S1_16	2	5367	FALSE
GH127_S1_16	GH127	S1_16	1	1499	FALSE
GH127_S1_16	GH127	S1_16	1	1499	FALSE
GH127_S1_16	GH127	S1_16	1	2186	FALSE
GH127_S1_16	GH127	S1_16	2	4695	FALSE
GH127_S1_16	GH127	S1_16	1	1542	FALSE
GH127_S1_16	GH127	S1_16	1	1499	FALSE
GH127_S1_16	GH127	S1_16	2	3522	FALSE
GH127_S1_16	GH127	S1_16	1	1443	FALSE
GH127_S1_16	GH127	S1_16	1	1418	FALSE
GH127_S1_16	GH127	S1_16	2	4052	FALSE
GH127_S1_16	GH127	S1_16	2	2945	FALSE
GH127_S1_19	GH127	S1_19	5	6283	FALSE
GH127_S1_19	GH127	S1_19	5	6280	FALSE
GH127_S1_20	GH127	S1_20	40	42970	FALSE
GH127_S1_20	GH127	S1_20	4	9795	FALSE
GH127_S1_20	GH127	S1_20	4	9240	FALSE
GH127_S1_20	GH127	S1_20	3	6087	FALSE
GH127_S1_27	GH127	S1_27	1	2041	FALSE
GH127_S1_27	GH127	S1_27	1	1612	FALSE
GH127_S1_30	GH127	S1_30	10	20807	FALSE
GH127_S1_30	GH127	S1_30	1	2129	FALSE
GH127_S1_30	GH127	S1_30	1	1679	FALSE
GH127_S1_30	GH127	S1_30	10	20222	FALSE
GH127_S1_30	GH127	S1_30	1	2124	FALSE
GH127_S1_4	GH127	S1_4	1	2089	FALSE
GH127_S1_8	GH127	S1_8	6	6988	FALSE
GH127_S1_8	GH127	S1_8	7	8487	FALSE
GH127_S1_8	GH127	S1_8	4	6240	FALSE
GH127_S1_8	GH127	S1_8	1	1624	FALSE
GH127_S1_8	GH127	S1_8	6	13069	FALSE
GH127_S1_8	GH127	S1_8	14	29351	FALSE
GH127_S1_8	GH127	S1_8	7	12880	FALSE
GH127_S1_8	GH127	S1_8	8	14396	FALSE
GH127_S1_8	GH127	S1_8	6	12493	FALSE
GH127_S1_N.C.	GH127	S1_N.C.	1	2034	FALSE
GH127_S1_N.C.	GH127	S1_N.C.	1	2036	FALSE
GH127_S1_N.C.	GH127	S1_N.C.	1	2023	FALSE
GH128_GH16_1	GH128	GH16_1	1	1301	FALSE
GH128_GH16_1	GH128	GH16_1	1	1301	FALSE
GH128_GH16_1	GH128	GH16_1	1	1301	FALSE
GH128_GH16_13	GH128	GH16_13	1	1383	FALSE
GH128_S1_20	GH128	S1_20	1	1367	FALSE
GH128_S1_20	GH128	S1_20	1	1406	FALSE
GH13_1_GH13_1	GH13_1	GH13_1	39	52222	TRUE
GH13_1_GH13_1	GH13_1	GH13_1	77	95224	TRUE
GH13_1_GH13_1	GH13_1	GH13_1	38	43002	TRUE
GH13_1_GH13_1	GH13_1	GH13_1	39	52222	TRUE
GH13_1_GH13_1	GH13_1	GH13_1	76	95224	TRUE
GH13_1_GH13_1	GH13_1	GH13_1	37	43002	TRUE
GH13_1_GH13_1	GH13_1	GH13_1	37	43599	TRUE
GH13_1_GH13_1	GH13_1	GH13_1	76	96259	TRUE
GH13_1_GH13_1	GH13_1	GH13_1	39	52660	TRUE
GH13_1_GH13_1	GH13_1	GH13_1	1	2369	TRUE
GH13_1_GH13_1	GH13_1	GH13_1	3	5464	TRUE
GH13_1_GH13_1	GH13_1	GH13_1	2	3095	TRUE
GH13_1_GH13_1	GH13_1	GH13_1	2	3071	TRUE
GH13_1_GH13_1	GH13_1	GH13_1	7	8736	TRUE
GH13_1_GH13_1	GH13_1	GH13_1	1	2382	TRUE
GH13_1_GH13_1	GH13_1	GH13_1	1	2221	TRUE
GH13_1_GH13_1	GH13_1	GH13_1	5	8888	TRUE
GH13_1_GH13_1	GH13_1	GH13_1	1	2311	TRUE
GH13_1_GH13_1	GH13_1	GH13_1	3	5377	TRUE
GH13_1_GH13_1	GH13_1	GH13_1	2	3066	TRUE
GH13_1_GH13_1	GH13_1	GH13_1	1	2382	TRUE
GH13_1_GH13_1	GH13_1	GH13_1	1	2322	TRUE
GH13_1_GH13_1	GH13_1	GH13_1	1	2420	TRUE
GH13_1_GH13_1	GH13_1	GH13_1	1	2374	TRUE
GH13_1_GH13_1	GH13_1	GH13_1	2	3447	TRUE
GH13_1_GH13_1	GH13_1	GH13_1	3	5190	TRUE
GH13_1_GH13_1	GH13_1	GH13_1	1	1743	TRUE
GH13_1_GH13_1	GH13_1	GH13_1	2	2315	TRUE
GH13_1_GH13_1	GH13_1	GH13_1	1	1353	TRUE
GH13_1_GH13_1	GH13_1	GH13_1	9	15383	TRUE
GH13_1_GH13_1	GH13_1	GH13_1	3	3084	TRUE
GH13_1_GH13_1	GH13_1	GH13_1	3	5028	TRUE
GH13_1_GH13_1	GH13_1	GH13_1	2	3224	TRUE
GH13_1_GH13_1	GH13_1	GH13_1	3	4977	TRUE
GH13_1_GH13_1	GH13_1	GH13_1	1	1753	TRUE
GH13_1_GH13_1	GH13_1	GH13_1	1	1491	TRUE
GH13_1_GH13_1	GH13_1	GH13_1	2	3251	TRUE
GH13_1_GH13_1	GH13_1	GH13_1	3	4997	TRUE
GH13_1_GH13_1	GH13_1	GH13_1	1	1746	TRUE
GH13_1_GH13_1	GH13_1	GH13_1	1	1361	TRUE
GH13_1_GH13_1	GH13_1	GH13_1	1	2395	TRUE
GH13_1_GH13_1	GH13_1	GH13_1	3	5439	TRUE
GH13_1_GH13_1	GH13_1	GH13_1	2	3044	TRUE
GH13_1_GH13_1	GH13_1	GH13_1	3	5028	TRUE
GH13_1_GH13_10	GH13_1	GH13_10	37	48972	FALSE
GH13_1_GH13_10	GH13_1	GH13_10	2	3250	FALSE
GH13_1_GH13_10	GH13_1	GH13_10	40	46252	FALSE
GH13_1_GH13_10	GH13_1	GH13_10	37	48972	FALSE
GH13_1_GH13_10	GH13_1	GH13_10	2	3250	FALSE
GH13_1_GH13_10	GH13_1	GH13_10	39	46252	FALSE
GH13_1_GH13_10	GH13_1	GH13_10	39	46681	FALSE
GH13_1_GH13_10	GH13_1	GH13_10	80	101307	FALSE
GH13_1_GH13_10	GH13_1	GH13_10	2	3082	FALSE
GH13_1_GH13_10	GH13_1	GH13_10	43	57708	FALSE
GH13_1_GH13_10	GH13_1	GH13_10	37	49578	FALSE
GH13_1_GH13_10	GH13_1	GH13_10	4	5048	FALSE
GH13_1_GH13_10	GH13_1	GH13_10	1	1968	FALSE
GH13_1_GH13_10	GH13_1	GH13_10	3	6027	FALSE
GH13_1_GH13_10	GH13_1	GH13_10	1	1992	FALSE
GH13_1_GH13_10	GH13_1	GH13_10	2	4418	FALSE
GH13_1_GH13_10	GH13_1	GH13_10	6	9662	FALSE
GH13_1_GH13_10	GH13_1	GH13_10	7	11836	FALSE
GH13_1_GH13_10	GH13_1	GH13_10	3	5721	FALSE
GH13_1_GH13_10	GH13_1	GH13_10	2	3547	FALSE
GH13_1_GH13_10	GH13_1	GH13_10	5	10257	FALSE
GH13_1_GH13_10	GH13_1	GH13_10	8	13341	FALSE
GH13_1_GH13_10	GH13_1	GH13_10	4	8078	FALSE
GH13_1_GH13_10	GH13_1	GH13_10	7	11162	FALSE
GH13_1_GH13_10	GH13_1	GH13_10	2	4280	FALSE
GH13_1_GH13_10	GH13_1	GH13_10	5	9338	FALSE
GH13_1_GH13_10	GH13_1	GH13_10	1	2004	FALSE
GH13_1_GH13_10	GH13_1	GH13_10	1	1733	FALSE
GH13_1_GH13_13	GH13_1	GH13_13	1	1874	FALSE
GH13_1_GH13_13	GH13_1	GH13_13	2	3277	FALSE
GH13_1_GH13_13	GH13_1	GH13_13	1	1751	FALSE
GH13_1_GH13_13	GH13_1	GH13_13	2	3277	FALSE
GH13_1_GH13_13	GH13_1	GH13_13	1	1751	FALSE
GH13_1_GH13_25	GH13_1	GH13_25	1	1528	FALSE
GH13_1_GH13_25	GH13_1	GH13_25	6	7208	FALSE
GH13_1_GH13_25	GH13_1	GH13_25	1	1933	FALSE
GH13_1_GH13_25	GH13_1	GH13_25	3	5195	FALSE
GH13_1_GH13_25	GH13_1	GH13_25	6	8279	FALSE
GH13_1_GH13_25	GH13_1	GH13_25	6	9731	FALSE
GH13_1_GH13_25	GH13_1	GH13_25	6	8947	FALSE
GH13_1_GH16_11	GH13_1	GH16_11	10	20622	FALSE
GH13_1_GH16_11	GH13_1	GH16_11	9	18253	FALSE
GH13_1_GH16_11	GH13_1	GH16_11	7	15158	FALSE
GH13_1_GH16_13	GH13_1	GH16_13	2	3332	FALSE
GH13_1_GH2	GH13_1	GH2	29	33440	FALSE
GH13_1_GH2	GH13_1	GH2	29	33440	FALSE
GH13_1_GH2	GH13_1	GH2	9	10864	FALSE
GH13_1_GH20	GH13_1	GH20	7	15338	FALSE
GH13_1_GH20	GH13_1	GH20	6	12969	FALSE
GH13_1_GH20	GH13_1	GH20	4	9874	FALSE
GH13_1_GH20	GH13_1	GH20	1	1876	FALSE
GH13_1_GH23	GH13_1	GH23	256	293192	FALSE
GH13_1_GH23	GH13_1	GH23	255	293192	FALSE
GH13_1_GH28	GH13_1	GH28	2	3500	FALSE
GH13_1_GH3	GH13_1	GH3	4	5539	FALSE
GH13_1_GH31	GH13_1	GH31	54	55295	FALSE
GH13_1_GH31	GH13_1	GH31	45	39912	FALSE
GH13_1_GH31	GH13_1	GH31	7	10312	FALSE
GH13_1_GH32	GH13_1	GH32	1	1475	FALSE
GH13_1_GH32	GH13_1	GH32	1	1475	FALSE
GH13_1_GH36	GH13_1	GH36	26	27232	FALSE
GH13_1_GH36	GH13_1	GH36	117	132050	FALSE
GH13_1_GH36	GH13_1	GH36	26	27232	FALSE
GH13_1_GH36	GH13_1	GH36	117	132050	FALSE
GH13_1_GH36	GH13_1	GH36	3	4577	FALSE
GH13_1_GH4	GH13_1	GH4	4	4593	FALSE
GH13_1_GH4	GH13_1	GH4	4	4593	FALSE
GH13_1_GH43_10	GH13_1	GH43_10	10	17729	FALSE
GH13_1_GH43_10	GH13_1	GH43_10	9	15347	FALSE
GH13_1_GH43_10	GH13_1	GH43_10	10	17729	FALSE
GH13_1_GH43_10	GH13_1	GH43_10	9	15347	FALSE
GH13_1_GH43_10	GH13_1	GH43_10	25	33947	FALSE
GH13_1_GH57	GH13_1	GH57	8	13036	FALSE
GH13_1_GH65	GH13_1	GH65	5	7119	FALSE
GH13_1_GH65	GH13_1	GH65	5	7119	FALSE
GH13_1_GH73	GH13_1	GH73	182	204785	FALSE
GH13_1_GH73	GH13_1	GH73	143	152563	FALSE
GH13_1_GH73	GH13_1	GH73	105	109561	FALSE
GH13_1_GH73	GH13_1	GH73	179	204785	FALSE
GH13_1_GH73	GH13_1	GH73	140	152563	FALSE
GH13_1_GH73	GH13_1	GH73	103	109561	FALSE
GH13_1_GH77	GH13_1	GH77	36	46565	FALSE
GH13_1_GH77	GH13_1	GH77	3	5657	FALSE
GH13_1_GH77	GH13_1	GH77	41	48659	FALSE
GH13_1_GH77	GH13_1	GH77	36	46565	FALSE
GH13_1_GH77	GH13_1	GH77	3	5657	FALSE
GH13_1_GH77	GH13_1	GH77	40	48659	FALSE
GH13_1_GH77	GH13_1	GH77	40	49136	FALSE
GH13_1_GH77	GH13_1	GH77	3	5537	FALSE
GH13_1_GH77	GH13_1	GH77	36	47123	FALSE
GH13_1_GH77	GH13_1	GH77	4	7391	FALSE
GH13_1_GH77	GH13_1	GH77	3	5022	FALSE
GH13_1_GH77	GH13_1	GH77	1	1927	FALSE
GH13_1_GH77	GH13_1	GH77	1	2241	FALSE
GH13_1_GH77	GH13_1	GH77	8	10474	FALSE
GH13_1_GH77	GH13_1	GH77	1	1738	FALSE
GH13_1_GH77	GH13_1	GH77	1	2121	FALSE
GH13_1_GH77	GH13_1	GH77	4	7282	FALSE
GH13_1_GH77	GH13_1	GH77	3	4971	FALSE
GH13_1_GH77	GH13_1	GH77	1	1905	FALSE
GH13_1_GH77	GH13_1	GH77	1	2125	FALSE
GH13_1_GH77	GH13_1	GH77	1	1762	FALSE
GH13_1_GH77	GH13_1	GH77	8	13621	FALSE
GH13_1_GH77	GH13_1	GH77	3	5801	FALSE
GH13_1_GH77	GH13_1	GH77	2	3542	FALSE
GH13_1_GH77	GH13_1	GH77	1	2051	FALSE
GH13_1_GH77	GH13_1	GH77	4	7357	FALSE
GH13_1_GH77	GH13_1	GH77	3	4962	FALSE
GH13_1_GH77	GH13_1	GH77	1	1918	FALSE
GH13_1_GH92	GH13_1	GH92	159	171628	FALSE
GH13_1_GH92	GH13_1	GH92	160	174198	FALSE
GH13_1_GH92	GH13_1	GH92	161	176727	FALSE
GH13_1_GH92	GH13_1	GH92	162	179480	FALSE
GH13_1_GH92	GH13_1	GH92	163	182034	FALSE
GH13_1_GH92	GH13_1	GH92	120	119406	FALSE
GH13_1_GH92	GH13_1	GH92	121	121976	FALSE
GH13_1_GH92	GH13_1	GH92	122	124505	FALSE
GH13_1_GH92	GH13_1	GH92	123	127258	FALSE
GH13_1_GH92	GH13_1	GH92	124	129812	FALSE
GH13_1_GH92	GH13_1	GH92	82	76404	FALSE
GH13_1_GH92	GH13_1	GH92	83	78974	FALSE
GH13_1_GH92	GH13_1	GH92	84	81503	FALSE
GH13_1_GH92	GH13_1	GH92	85	84256	FALSE
GH13_1_GH92	GH13_1	GH92	86	86810	FALSE
GH13_1_GH92	GH13_1	GH92	156	171628	FALSE
GH13_1_GH92	GH13_1	GH92	157	174198	FALSE
GH13_1_GH92	GH13_1	GH92	158	176727	FALSE
GH13_1_GH92	GH13_1	GH92	159	179480	FALSE
GH13_1_GH92	GH13_1	GH92	160	182034	FALSE
GH13_1_GH92	GH13_1	GH92	117	119406	FALSE
GH13_1_GH92	GH13_1	GH92	118	121976	FALSE
GH13_1_GH92	GH13_1	GH92	119	124505	FALSE
GH13_1_GH92	GH13_1	GH92	120	127258	FALSE
GH13_1_GH92	GH13_1	GH92	121	129812	FALSE
GH13_1_GH92	GH13_1	GH92	80	76404	FALSE
GH13_1_GH92	GH13_1	GH92	81	78974	FALSE
GH13_1_GH92	GH13_1	GH92	82	81503	FALSE
GH13_1_GH92	GH13_1	GH92	83	84256	FALSE
GH13_1_GH92	GH13_1	GH92	84	86810	FALSE
GH13_1_GH92	GH13_1	GH92	85	86984	FALSE
GH13_1_GH92	GH13_1	GH92	122	130583	FALSE
GH13_1_GH92	GH13_1	GH92	161	183243	FALSE
GH13_1_GH92	GH13_1	GH92	84	84025	FALSE
GH13_1_GH92	GH13_1	GH92	121	127624	FALSE
GH13_1_GH92	GH13_1	GH92	160	180284	FALSE
GH13_1_GH92	GH13_1	GH92	83	81599	FALSE
GH13_1_GH92	GH13_1	GH92	120	125198	FALSE
GH13_1_GH92	GH13_1	GH92	159	177858	FALSE
GH13_1_GH92	GH13_1	GH92	82	78773	FALSE
GH13_1_GH92	GH13_1	GH92	119	122372	FALSE
GH13_1_GH92	GH13_1	GH92	158	175032	FALSE
GH13_1_GH92	GH13_1	GH92	81	76227	FALSE
GH13_1_GH92	GH13_1	GH92	118	119826	FALSE
GH13_1_GH92	GH13_1	GH92	157	172486	FALSE
GH13_1_GH97	GH13_1	GH97	5	9941	FALSE
GH13_1_GH97	GH13_1	GH97	5	9957	FALSE
GH13_1_GH97	GH13_1	GH97	5	9495	FALSE
GH13_1_GH97	GH13_1	GH97	1	3564	FALSE
GH13_1_GH97	GH13_1	GH97	7	14148	FALSE
GH13_1_GH97	GH13_1	GH97	4	9120	FALSE
GH13_1_GH97	GH13_1	GH97	7	14445	FALSE
GH13_1_GH97	GH13_1	GH97	5	11221	FALSE
GH13_1_GH97	GH13_1	GH97	4	9468	FALSE
GH13_1_GH97	GH13_1	GH97	3	5766	FALSE
GH13_1_GH97	GH13_1	GH97	2	4275	FALSE
GH13_1_GH97	GH13_1	GH97	4	9421	FALSE
GH13_1_GH97	GH13_1	GH97	4	9264	FALSE
GH13_1_GH97	GH13_1	GH97	5	11659	FALSE
GH13_1_GH97	GH13_1	GH97	7	14703	FALSE
GH13_1_GH97	GH13_1	GH97	7	14148	FALSE
GH13_1_GH97	GH13_1	GH97	4	9120	FALSE
GH13_1_GH97	GH13_1	GH97	4	9396	FALSE
GH13_1_GT2_Glyco_tranf_2_3	GH13_1	GT2_Glyco_tranf_2_3	6	5434	FALSE
GH13_1_GT2_Glycos_transf_2	GH13_1	GT2_Glycos_transf_2	22	21728	FALSE
GH13_1_GT2_Glycos_transf_2	GH13_1	GT2_Glycos_transf_2	22	21728	FALSE
GH13_1_GT2_Glycos_transf_2	GH13_1	GT2_Glycos_transf_2	19	28603	FALSE
GH13_1_GT2_Glycos_transf_2	GH13_1	GT2_Glycos_transf_2	18	26292	FALSE
GH13_1_GT2_Glycos_transf_2	GH13_1	GT2_Glycos_transf_2	16	23226	FALSE
GH13_1_GT2_Glycos_transf_2	GH13_1	GT2_Glycos_transf_2	15	19418	FALSE
GH13_1_GT35	GH13_1	GT35	35	43994	FALSE
GH13_1_GT35	GH13_1	GT35	4	8228	FALSE
GH13_1_GT35	GH13_1	GT35	42	51230	FALSE
GH13_1_GT35	GH13_1	GT35	35	43994	FALSE
GH13_1_GT35	GH13_1	GT35	4	8228	FALSE
GH13_1_GT35	GH13_1	GT35	41	51230	FALSE
GH13_1_GT35	GH13_1	GT35	41	51434	FALSE
GH13_1_GT35	GH13_1	GT35	4	7835	FALSE
GH13_1_GT35	GH13_1	GT35	35	44825	FALSE
GH13_1_GT35	GH13_1	GT35	9	11939	FALSE
GH13_1_GT35	GH13_1	GT35	2	3203	FALSE
GH13_1_GT35	GH13_1	GT35	2	4384	FALSE
GH13_1_GT35	GH13_1	GT35	1	2425	FALSE
GH13_1_GT35	GH13_1	GT35	1	2517	FALSE
GH13_1_GT35	GH13_1	GT35	1	2518	FALSE
GH13_1_GT35	GH13_1	GT35	4	6508	FALSE
GH13_1_GT35	GH13_1	GT35	1	2380	FALSE
GH13_1_GT35	GH13_1	GT35	1	2425	FALSE
GH13_1_GT35	GH13_1	GT35	1	2431	FALSE
GH13_1_GT35	GH13_1	GT35	16	19000	FALSE
GH13_1_GT35	GH13_1	GT35	16	18849	FALSE
GH13_1_GT35	GH13_1	GT35	1	2416	FALSE
GH13_1_GT35	GH13_1	GT35	1	2405	FALSE
GH13_1_GT35	GH13_1	GT35	2	3425	FALSE
GH13_1_GT35	GH13_1	GT35	11	18808	FALSE
GH13_1_GT35	GH13_1	GT35	2	3185	FALSE
GH13_1_GT35	GH13_1	GT35	5	6269	FALSE
GH13_1_GT35	GH13_1	GT35	2	2356	FALSE
GH13_1_GT35	GH13_1	GT35	1	2405	FALSE
GH13_1_GT35	GH13_1	GT35	1	2405	FALSE
GH13_1_GT4	GH13_1	GT4	46	42172	FALSE
GH13_1_GT4	GH13_1	GT4	43	39039	FALSE
GH13_1_GT4	GH13_1	GT4	44	42172	FALSE
GH13_1_GT4	GH13_1	GT4	41	39039	FALSE
GH13_1_GT4	GH13_1	GT4	3	5062	FALSE
GH13_1_GT4	GH13_1	GT4	1	1991	FALSE
GH13_1_GT4	GH13_1	GT4	4	6099	FALSE
GH13_1_GT4	GH13_1	GT4	3	4945	FALSE
GH13_1_GT4	GH13_1	GT4	2	3943	FALSE
GH13_1_GT4	GH13_1	GT4	2	3938	FALSE
GH13_1_GT4	GH13_1	GT4	7	11731	FALSE
GH13_1_GT4	GH13_1	GT4	1	1010	FALSE
GH13_1_GT4	GH13_1	GT4	3	4261	FALSE
GH13_1_GT4	GH13_1	GT4	4	6007	FALSE
GH13_1_GT4	GH13_1	GT4	7	10224	FALSE
GH13_1_GT4	GH13_1	GT4	18	21925	FALSE
GH13_1_GT41	GH13_1	GT41	56	61928	FALSE
GH13_1_GT41	GH13_1	GT41	56	61928	FALSE
GH13_1_GT5	GH13_1	GT5	2	4165	FALSE
GH13_1_GT5	GH13_1	GT5	2	4165	FALSE
GH13_1_GT5	GH13_1	GT5	2	3891	FALSE
GH13_1_GT51	GH13_1	GT51	38	51367	FALSE
GH13_1_GT51	GH13_1	GT51	1	855	FALSE
GH13_1_GT51	GH13_1	GT51	39	43857	FALSE
GH13_1_GT51	GH13_1	GT51	38	51367	FALSE
GH13_1_GT51	GH13_1	GT51	1	855	FALSE
GH13_1_GT51	GH13_1	GT51	38	43857	FALSE
GH13_1_GT51	GH13_1	GT51	38	45840	FALSE
GH13_1_GT51	GH13_1	GT51	1	2241	FALSE
GH13_1_GT51	GH13_1	GT51	38	50419	FALSE
GH13_1_GT83	GH13_1	GT83	23	22771	FALSE
GH13_1_GT83	GH13_1	GT83	23	22771	FALSE
GH13_1_GT83	GH13_1	GT83	7	7959	FALSE
GH13_1_GT9	GH13_1	GT9	160	201661	FALSE
GH13_1_GT9	GH13_1	GT9	158	201661	FALSE
GH13_1_PL7_3	GH13_1	PL7_3	61	66677	FALSE
GH13_1_PL7_3	GH13_1	PL7_3	61	66677	FALSE
GH13_1_S1_13	GH13_1	S1_13	42	50135	FALSE
GH13_1_S1_13	GH13_1	S1_13	42	50135	FALSE
GH13_1_S1_16	GH13_1	S1_16	9	11166	FALSE
GH13_1_S1_28	GH13_1	S1_28	19	23494	FALSE
GH13_10_GH13_10	GH13_10	GH13_10	41	54626	TRUE
GH13_10_GH13_10	GH13_10	GH13_10	2	4574	TRUE
GH13_10_GH13_10	GH13_10	GH13_10	1	2174	TRUE
GH13_10_GH13_10	GH13_10	GH13_10	1	2173	TRUE
GH13_10_GH13_10	GH13_10	GH13_10	1	2179	TRUE
GH13_10_GH13_10	GH13_10	GH13_10	2	2848	TRUE
GH13_10_GH13_25	GH13_10	GH13_25	2	5062	FALSE
GH13_10_GH13_25	GH13_10	GH13_25	1	2883	FALSE
GH13_10_GH13_3	GH13_10	GH13_3	1	2181	FALSE
GH13_10_GH2	GH13_10	GH2	17	18528	FALSE
GH13_10_GH28	GH13_10	GH28	1	1508	FALSE
GH13_10_GH31	GH13_10	GH31	48	45633	FALSE
GH13_10_GH31	GH13_10	GH31	47	43459	FALSE
GH13_10_GH43_10	GH13_10	GH43_10	5	6778	FALSE
GH13_10_GH53	GH13_10	GH53	6	9150	FALSE
GH13_10_GH57	GH13_10	GH57	3	4703	FALSE
GH13_10_GH73	GH13_10	GH73	145	155813	FALSE
GH13_10_GH73	GH13_10	GH73	142	155813	FALSE
GH13_10_GH77	GH13_10	GH77	1	2407	FALSE
GH13_10_GH77	GH13_10	GH77	1	2407	FALSE
GH13_10_GH77	GH13_10	GH77	1	2455	FALSE
GH13_10_GH77	GH13_10	GH77	40	52171	FALSE
GH13_10_GH77	GH13_10	GH77	1	2204	FALSE
GH13_10_GH77	GH13_10	GH77	5	7900	FALSE
GH13_10_GH77	GH13_10	GH77	6	10074	FALSE
GH13_10_GH77	GH13_10	GH77	1	1521	FALSE
GH13_10_GH77	GH13_10	GH77	3	4745	FALSE
GH13_10_GH77	GH13_10	GH77	1	2047	FALSE
GH13_10_GH92	GH13_10	GH92	122	122656	FALSE
GH13_10_GH92	GH13_10	GH92	123	125226	FALSE
GH13_10_GH92	GH13_10	GH92	124	127755	FALSE
GH13_10_GH92	GH13_10	GH92	125	130508	FALSE
GH13_10_GH92	GH13_10	GH92	126	133062	FALSE
GH13_10_GH92	GH13_10	GH92	119	122656	FALSE
GH13_10_GH92	GH13_10	GH92	120	125226	FALSE
GH13_10_GH92	GH13_10	GH92	121	127755	FALSE
GH13_10_GH92	GH13_10	GH92	122	130508	FALSE
GH13_10_GH92	GH13_10	GH92	123	133062	FALSE
GH13_10_GH92	GH13_10	GH92	124	133665	FALSE
GH13_10_GH92	GH13_10	GH92	165	188291	FALSE
GH13_10_GH92	GH13_10	GH92	123	130706	FALSE
GH13_10_GH92	GH13_10	GH92	164	185332	FALSE
GH13_10_GH92	GH13_10	GH92	122	128280	FALSE
GH13_10_GH92	GH13_10	GH92	163	182906	FALSE
GH13_10_GH92	GH13_10	GH92	121	125454	FALSE
GH13_10_GH92	GH13_10	GH92	162	180080	FALSE
GH13_10_GH92	GH13_10	GH92	120	122908	FALSE
GH13_10_GH92	GH13_10	GH92	161	177534	FALSE
GH13_10_GT2_Glycos_transf_2	GH13_10	GT2_Glycos_transf_2	13	14775	FALSE
GH13_10_GT35	GH13_10	GT35	2	4978	FALSE
GH13_10_GT35	GH13_10	GT35	2	4978	FALSE
GH13_10_GT35	GH13_10	GT35	2	4753	FALSE
GH13_10_GT35	GH13_10	GT35	39	49873	FALSE
GH13_10_GT35	GH13_10	GT35	1	2160	FALSE
GH13_10_GT35	GH13_10	GT35	1	2414	FALSE
GH13_10_GT35	GH13_10	GT35	1	2207	FALSE
GH13_10_GT35	GH13_10	GT35	4	5968	FALSE
GH13_10_GT35	GH13_10	GT35	2	3509	FALSE
GH13_10_GT35	GH13_10	GT35	1	2415	FALSE
GH13_10_GT35	GH13_10	GT35	1	2013	FALSE
GH13_10_GT35	GH13_10	GT35	8	13087	FALSE
GH13_10_GT35	GH13_10	GT35	9	15261	FALSE
GH13_10_GT35	GH13_10	GT35	3	6001	FALSE
GH13_10_GT35	GH13_10	GT35	2	3828	FALSE
GH13_10_GT35	GH13_10	GT35	3	7072	FALSE
GH13_10_GT35	GH13_10	GT35	2	4893	FALSE
GH13_10_GT35	GH13_10	GT35	1	1875	FALSE
GH13_10_GT35	GH13_10	GT35	4	6276	FALSE
GH13_10_GT4	GH13_10	GT4	3	4131	FALSE
GH13_10_GT4	GH13_10	GT4	1	1464	FALSE
GH13_10_GT4	GH13_10	GT4	16	20142	FALSE
GH13_10_GT4	GH13_10	GT4	3	4448	FALSE
GH13_10_GT4	GH13_10	GT4	2	3359	FALSE
GH13_10_GT4	GH13_10	GT4	3	4448	FALSE
GH13_10_GT4	GH13_10	GT4	3	3762	FALSE
GH13_10_GT5	GH13_10	GT5	3	3985	FALSE
GH13_10_GT51	GH13_10	GT51	1	2395	FALSE
GH13_10_GT51	GH13_10	GT51	1	2395	FALSE
GH13_10_GT51	GH13_10	GT51	1	841	FALSE
GH13_10_GT51	GH13_10	GT51	42	55467	FALSE
GH13_13_GH23	GH13_13	GH23	15	17731	FALSE
GH13_13_GH97	GH13_13	GH97	5	10871	FALSE
GH13_13_GH97	GH13_13	GH97	5	10871	FALSE
GH13_13_GT4	GH13_13	GT4	19	23157	FALSE
GH13_17_GH13_35	GH13_17	GH13_35	2	2677	FALSE
GH13_25_GH16_11	GH13_25	GH16_11	13	16575	FALSE
GH13_25_GH16_11	GH13_25	GH16_11	13	16575	FALSE
GH13_25_GH29	GH13_25	GH29	14	18408	FALSE
GH13_25_GH29	GH13_25	GH29	14	18408	FALSE
GH13_25_GH4	GH13_25	GH4	5	6526	FALSE
GH13_25_GH57	GH13_25	GH57	2	3233	FALSE
GH13_25_GH57	GH13_25	GH57	2	3233	FALSE
GH13_25_GH57	GH13_25	GH57	2	3305	FALSE
GH13_25_GH57	GH13_25	GH57	2	2831	FALSE
GH13_25_GH77	GH13_25	GH77	7	8946	FALSE
GH13_25_GT35	GH13_25	GT35	8	10411	FALSE
GH13_25_GT35	GH13_25	GT35	1	2010	FALSE
GH13_25_GT4	GH13_25	GT4	1	1949	FALSE
GH13_25_GT4	GH13_25	GT4	1	1287	FALSE
GH13_25_GT4	GH13_25	GT4	1	1253	FALSE
GH13_25_GT4	GH13_25	GT4	1	1949	FALSE
GH13_25_GT4	GH13_25	GT4	1	1287	FALSE
GH13_25_GT4	GH13_25	GT4	1	1349	FALSE
GH13_25_GT4	GH13_25	GT4	1	1433	FALSE
GH13_25_GT4	GH13_25	GT4	1	2000	FALSE
GH13_25_GT4	GH13_25	GT4	1	1277	FALSE
GH13_25_GT4	GH13_25	GT4	1	1371	FALSE
GH13_25_GT5	GH13_25	GT5	3	5349	FALSE
GH13_25_GT5	GH13_25	GT5	2	3580	FALSE
GH13_25_GT5	GH13_25	GT5	3	5349	FALSE
GH13_25_S1_19	GH13_25	S1_19	12	15671	FALSE
GH13_25_S1_19	GH13_25	S1_19	12	15671	FALSE
GH13_3_GT35	GH13_3	GT35	2	4596	FALSE
GH130_GH2	GH130	GH2	7	7961	FALSE
GH130_GH2	GH130	GH2	7	7961	FALSE
GH130_GH26	GH130	GH26	1	1132	FALSE
GH130_GH26	GH130	GH26	1	1130	FALSE
GH130_GH26	GH130	GH26	7	11212	FALSE
GH130_GH26	GH130	GH26	1	1130	FALSE
GH130_GH26	GH130	GH26	1	1132	FALSE
GH130_GH26	GH130	GH26	1	1543	FALSE
GH130_GH26	GH130	GH26	1	1176	FALSE
GH130_GH26	GH130	GH26	1	1132	FALSE
GH130_GH26	GH130	GH26	1	1845	FALSE
GH130_GH26	GH130	GH26	5	7120	FALSE
GH130_GH26	GH130	GH26	5	6902	FALSE
GH130_GH26	GH130	GH26	4	5697	FALSE
GH130_GH26	GH130	GH26	1	1072	FALSE
GH130_GH26	GH130	GH26	1	1066	FALSE
GH130_GH43_1	GH130	GH43_1	9	14471	FALSE
GH130_GH43_1	GH130	GH43_1	5	8163	FALSE
GH130_GH5_41	GH130	GH5_41	5	8997	FALSE
GH130_GH5_41	GH130	GH5_41	5	8973	FALSE
GH130_GH5_41	GH130	GH5_41	1	1528	FALSE
GH130_GH5_41	GH130	GH5_41	1	1172	FALSE
GH130_GT2_Glyco_tranf_2_3	GH130	GT2_Glyco_tranf_2_3	11	11977	FALSE
GH130_GT2_Glycos_transf_2	GH130	GT2_Glycos_transf_2	6	7490	FALSE
GH130_GT2_Glycos_transf_2	GH130	GT2_Glycos_transf_2	18	22063	FALSE
GH130_GT2_Glycos_transf_2	GH130	GT2_Glycos_transf_2	6	7490	FALSE
GH130_GT2_Glycos_transf_2	GH130	GT2_Glycos_transf_2	6	7490	FALSE
GH130_GT4	GH130	GT4	12	13488	FALSE
GH130_S1_16	GH130	S1_16	7	9145	FALSE
GH130_S1_17	GH130	S1_17	3	3747	FALSE
GH130_S1_17	GH130	S1_17	2	2805	FALSE
GH130_S1_17	GH130	S1_17	8	12529	FALSE
GH130_S1_17	GH130	S1_17	3	3747	FALSE
GH130_S1_17	GH130	S1_17	3	3781	FALSE
GH130_S1_17	GH130	S1_17	1	1242	FALSE
GH130_S1_17	GH130	S1_17	3	3781	FALSE
GH130_S1_17	GH130	S1_17	4	6229	FALSE
GH130_S1_17	GH130	S1_17	3	3747	FALSE
GH130_S1_17	GH130	S1_17	2	3897	FALSE
GH130_S1_17	GH130	S1_17	1	1860	FALSE
GH130_S1_17	GH130	S1_17	2	2901	FALSE
GH130_S1_17	GH130	S1_17	3	4512	FALSE
GH130_S1_51	GH130	S1_51	3	2783	FALSE
GH133_GH13_10	GH133	GH13_10	1	2030	FALSE
GH133_GH2	GH133	GH2	7	11790	FALSE
GH133_GH57	GH133	GH57	2	3399	FALSE
GH133_GH57	GH133	GH57	2	2561	FALSE
GH133_GH57	GH133	GH57	2	3232	FALSE
GH133_GH57	GH133	GH57	2	3232	FALSE
GH133_GH57	GH133	GH57	2	2673	FALSE
GH133_GH57	GH133	GH57	2	3276	FALSE
GH133_GH57	GH133	GH57	2	2547	FALSE
GH133_GH57	GH133	GH57	2	2765	FALSE
GH133_GH57	GH133	GH57	2	2794	FALSE
GH133_GH57	GH133	GH57	2	2843	FALSE
GH133_GH57	GH133	GH57	2	3529	FALSE
GH133_GH57	GH133	GH57	2	3440	FALSE
GH133_GH57	GH133	GH57	2	3513	FALSE
GH133_GH57	GH133	GH57	2	3504	FALSE
GH133_GH57	GH133	GH57	2	3504	FALSE
GH133_GH57	GH133	GH57	2	3520	FALSE
GH133_GT3	GH133	GT3	1	2185	FALSE
GH133_GT3	GH133	GT3	1	4467	FALSE
GH133_GT3	GH133	GT3	1	2197	FALSE
GH133_GT3	GH133	GT3	1	2232	FALSE
GH133_GT35	GH133	GT35	1	2169	FALSE
GH133_GT35	GH133	GT35	1	2154	FALSE
GH133_GT35	GH133	GT35	3	4642	FALSE
GH133_GT35	GH133	GT35	1	2232	FALSE
GH133_GT35	GH133	GT35	1	2212	FALSE
GH133_GT35	GH133	GT35	1	2178	FALSE
GH133_GT35	GH133	GT35	1	2324	FALSE
GH133_GT35	GH133	GT35	1	2188	FALSE
GH133_GT35	GH133	GT35	1	2203	FALSE
GH133_GT4	GH133	GT4	1	1330	FALSE
GH133_GT4	GH133	GT4	1	1320	FALSE
GH133_GT4	GH133	GT4	1	2065	FALSE
GH133_GT4	GH133	GT4	1	1329	FALSE
GH133_GT4	GH133	GT4	1	1450	FALSE
GH133_GT4	GH133	GT4	1	2183	FALSE
GH133_GT4	GH133	GT4	1	1949	FALSE
GH133_GT4	GH133	GT4	1	1949	FALSE
GH133_GT4	GH133	GT4	1	1329	FALSE
GH133_GT4	GH133	GT4	1	1950	FALSE
GH133_GT4	GH133	GT4	1	1256	FALSE
GH133_GT4	GH133	GT4	1	1256	FALSE
GH133_GT4	GH133	GT4	1	1331	FALSE
GH133_GT4	GH133	GT4	1	1419	FALSE
GH133_GT4	GH133	GT4	1	1364	FALSE
GH133_GT4	GH133	GT4	1	1389	FALSE
GH133_GT4	GH133	GT4	1	1416	FALSE
GH133_GT4	GH133	GT4	1	1403	FALSE
GH133_GT4	GH133	GT4	1	1329	FALSE
GH133_GT4	GH133	GT4	1	1597	FALSE
GH133_GT4	GH133	GT4	1	1588	FALSE
GH133_GT4	GH133	GT4	1	1332	FALSE
GH133_GT4	GH133	GT4	1	2197	FALSE
GH133_GT4	GH133	GT4	1	1353	FALSE
GH133_GT4	GH133	GT4	1	565	FALSE
GH133_GT4	GH133	GT4	1	1480	FALSE
GH133_GT4	GH133	GT4	1	2109	FALSE
GH133_GT4	GH133	GT4	1	1432	FALSE
GH133_GT4	GH133	GT4	1	2190	FALSE
GH133_GT4	GH133	GT4	1	1456	FALSE
GH133_GT4	GH133	GT4	1	1329	FALSE
GH133_GT4	GH133	GT4	1	1424	FALSE
GH133_GT4	GH133	GT4	1	1395	FALSE
GH133_GT4	GH133	GT4	1	2183	FALSE
GH133_GT4	GH133	GT4	1	2171	FALSE
GH133_GT4	GH133	GT4	1	2193	FALSE
GH133_GT5	GH133	GT5	2	2493	FALSE
GH133_GT5	GH133	GT5	2	2493	FALSE
GH133_GT5	GH133	GT5	2	3621	FALSE
GH133_GT5	GH133	GT5	2	3621	FALSE
GH133_S1_16	GH133	S1_16	13	16821	FALSE
GH133_S1_16	GH133	S1_16	14	16709	FALSE
GH133_S1_16	GH133	S1_16	13	17250	FALSE
GH133_S1_16	GH133	S1_16	14	17138	FALSE
GH136_GH136	GH136	GH136	4	6741	TRUE
GH136_GH136	GH136	GH136	2	5952	TRUE
GH136_GH136	GH136	GH136	4	6741	TRUE
GH136_GH136	GH136	GH136	2	5952	TRUE
GH136_GH136	GH136	GH136	1	2276	TRUE
GH136_GH136	GH136	GH136	2	4493	TRUE
GH136_GH136	GH136	GH136	1	2217	TRUE
GH136_GH136	GH136	GH136	5	6890	TRUE
GH136_GH136	GH136	GH136	1	2109	TRUE
GH136_GH136	GH136	GH136	2	4393	TRUE
GH136_GH136	GH136	GH136	1	2284	TRUE
GH136_GH136	GH136	GH136	1	1029	TRUE
GH136_GH136	GH136	GH136	1	2276	TRUE
GH136_GH136	GH136	GH136	2	4499	TRUE
GH136_GH136	GH136	GH136	1	2223	TRUE
GH136_GH136	GH136	GH136	1	2109	TRUE
GH136_GH136	GH136	GH136	2	4393	TRUE
GH136_GH136	GH136	GH136	1	2284	TRUE
GH136_GH16_11	GH136	GH16_11	3	7510	FALSE
GH136_GH16_11	GH136	GH16_11	4	8635	FALSE
GH136_GH16_11	GH136	GH16_11	6	10141	FALSE
GH136_GH16_11	GH136	GH16_11	4	7378	FALSE
GH136_GH16_11	GH136	GH16_11	3	5506	FALSE
GH136_GH16_11	GH136	GH16_11	5	9984	FALSE
GH136_GH16_11	GH136	GH16_11	1	2457	FALSE
GH136_GH16_11	GH136	GH16_11	4	4433	FALSE
GH136_GH16_11	GH136	GH16_11	4	7595	FALSE
GH136_GH16_11	GH136	GH16_11	3	5486	FALSE
GH136_GH16_11	GH136	GH16_11	2	3202	FALSE
GH136_GH16_11	GH136	GH16_11	4	7595	FALSE
GH136_GH16_11	GH136	GH16_11	3	5486	FALSE
GH136_GH16_11	GH136	GH16_11	2	3202	FALSE
GH136_GH16_11	GH136	GH16_11	1	1104	FALSE
GH136_GH16_14	GH136	GH16_14	1	1469	FALSE
GH136_GH2	GH136	GH2	10	22038	FALSE
GH136_GH2	GH136	GH2	1	2621	FALSE
GH136_GH2	GH136	GH2	5	9130	FALSE
GH136_GH2	GH136	GH2	10	21480	FALSE
GH136_GH2	GH136	GH2	1	2621	FALSE
GH136_GH2	GH136	GH2	4	8973	FALSE
GH136_GH2	GH136	GH2	2	4824	FALSE
GH136_GH2	GH136	GH2	3	6933	FALSE
GH136_GH2	GH136	GH2	4	9217	FALSE
GH136_GH2	GH136	GH2	2	4824	FALSE
GH136_GH2	GH136	GH2	3	6933	FALSE
GH136_GH2	GH136	GH2	4	9217	FALSE
GH136_GH2	GH136	GH2	1	1960	FALSE
GH136_GH29	GH136	GH29	3	3783	FALSE
GH136_GH29	GH136	GH29	2	3107	FALSE
GH136_GH29	GH136	GH29	5	6958	FALSE
GH136_GH29	GH136	GH29	1	2187	FALSE
GH136_GH3	GH136	GH3	3	4380	FALSE
GH136_GH33	GH136	GH33	8	12544	FALSE
GH136_GH33	GH136	GH33	3	5654	FALSE
GH136_GH43_10	GH136	GH43_10	1	2274	FALSE
GH136_GH97	GH136	GH97	1	2103	FALSE
GH136_PL35	GH136	PL35	1	1872	FALSE
GH136_PL35	GH136	PL35	1	1719	FALSE
GH136_S1_15	GH136	S1_15	3	5215	FALSE
GH136_S1_15	GH136	S1_15	1	1526	FALSE
GH136_S1_15	GH136	S1_15	19	34092	FALSE
GH136_S1_15	GH136	S1_15	3	4660	FALSE
GH136_S1_15	GH136	S1_15	19	32541	FALSE
GH136_S1_15	GH136	S1_15	3	5215	FALSE
GH136_S1_15	GH136	S1_15	1	1526	FALSE
GH136_S1_15	GH136	S1_15	4	5296	FALSE
GH136_S1_15	GH136	S1_15	1	1594	FALSE
GH136_S1_17	GH136	S1_17	2	4427	FALSE
GH136_S1_19	GH136	S1_19	18	32651	FALSE
GH136_S1_19	GH136	S1_19	3	7194	FALSE
GH136_S1_19	GH136	S1_19	18	30980	FALSE
GH136_S1_23	GH136	S1_23	2	3386	FALSE
GH136_S1_29	GH136	S1_29	3	3736	FALSE
GH136_S1_29	GH136	S1_29	7	12355	FALSE
GH136_S1_29	GH136	S1_29	6	10079	FALSE
GH136_S1_29	GH136	S1_29	5	7862	FALSE
GH136_S1_29	GH136	S1_29	7	12355	FALSE
GH136_S1_29	GH136	S1_29	6	10079	FALSE
GH136_S1_29	GH136	S1_29	5	7856	FALSE
GH136_S1_29	GH136	S1_29	2	3791	FALSE
GH136_S1_7	GH136	S1_7	3	7531	FALSE
GH136_S1_7	GH136	S1_7	1	1579	FALSE
GH136_S1_72	GH136	S1_72	4	6482	FALSE
GH136_S1_72	GH136	S1_72	3	6332	FALSE
GH136_S1_72	GH136	S1_72	7	10613	FALSE
GH136_S1_72	GH136	S1_72	2	3723	FALSE
GH139_GH36	GH139	GH36	2	2721	FALSE
GH139_GH95	GH139	GH95	2	4123	FALSE
GH140_GH16_11	GH140	GH16_11	51	62956	FALSE
GH140_GH16_13	GH140	GH16_13	1	811	FALSE
GH140_GH16_13	GH140	GH16_13	1	1416	FALSE
GH140_GH16_13	GH140	GH16_13	1	811	FALSE
GH140_GH2	GH140	GH2	4	5471	FALSE
GH140_GH2	GH140	GH2	4	5971	FALSE
GH140_GH26	GH140	GH26	1	1146	FALSE
GH140_GH3	GH140	GH3	3	3163	FALSE
GH140_GH3	GH140	GH3	3	3924	FALSE
GH140_GH43_1	GH140	GH43_1	2	2282	FALSE
GH140_GH43_1	GH140	GH43_1	2	1723	FALSE
GH140_GH5_22	GH140	GH5_22	1	1439	FALSE
GH140_S1_25	GH140	S1_25	1	2012	FALSE
GH140_S1_29	GH140	S1_29	48	60541	FALSE
GH141_GH141	GH141	GH141	4	9809	TRUE
GH141_GH141	GH141	GH141	4	9809	TRUE
GH141_GH141	GH141	GH141	1	2085	TRUE
GH141_GH141	GH141	GH141	1	1903	TRUE
GH141_GH141	GH141	GH141	1	2085	TRUE
GH141_GH16_11	GH141	GH16_11	15	16654	FALSE
GH141_GH16_11	GH141	GH16_11	1	2119	FALSE
GH141_GH16_11	GH141	GH16_11	15	16654	FALSE
GH141_GH2	GH141	GH2	1	3146	FALSE
GH141_GH2	GH141	GH2	14	14116	FALSE
GH141_GH2	GH141	GH2	2	4149	FALSE
GH141_GH2	GH141	GH2	1	2064	FALSE
GH141_GH2	GH141	GH2	2	3431	FALSE
GH141_GH2	GH141	GH2	4	8319	FALSE
GH141_GH2	GH141	GH2	3	6416	FALSE
GH141_GH2	GH141	GH2	1	2102	FALSE
GH141_GH2	GH141	GH2	3	6494	FALSE
GH141_GH2	GH141	GH2	1	3146	FALSE
GH141_GH2	GH141	GH2	14	14116	FALSE
GH141_GH2	GH141	GH2	2	4149	FALSE
GH141_GH2	GH141	GH2	1	2064	FALSE
GH141_GH2	GH141	GH2	1	1902	FALSE
GH141_GH28	GH141	GH28	1	1996	FALSE
GH141_GH28	GH141	GH28	1	1977	FALSE
GH141_GH29	GH141	GH29	4	6693	FALSE
GH141_GH29	GH141	GH29	2	3748	FALSE
GH141_GH31	GH141	GH31	1	2559	FALSE
GH141_GH31	GH141	GH31	5	7375	FALSE
GH141_GH43_10	GH141	GH43_10	1	1495	FALSE
GH141_GH86	GH141	GH86	5	5211	FALSE
GH141_GT5	GH141	GT5	8	11701	FALSE
GH141_S1_17	GH141	S1_17	1	1991	FALSE
GH141_S1_17	GH141	S1_17	1	1991	FALSE
GH141_S1_17	GH141	S1_17	1	1958	FALSE
GH141_S1_24	GH141	S1_24	3	5125	FALSE
GH141_S1_24	GH141	S1_24	3	5125	FALSE
GH141_S1_24	GH141	S1_24	3	5092	FALSE
GH141_S1_25	GH141	S1_25	2	3584	FALSE
GH141_S1_25	GH141	S1_25	2	3584	FALSE
GH141_S1_25	GH141	S1_25	2	3551	FALSE
GH141_S1_28	GH141	S1_28	1	2245	FALSE
GH141_S1_28	GH141	S1_28	1	2245	FALSE
GH141_S1_28	GH141	S1_28	1	2278	FALSE
GH141_S1_30	GH141	S1_30	2	2246	FALSE
GH141_S1_40	GH141	S1_40	1	1573	FALSE
GH141_S1_72	GH141	S1_72	4	3388	FALSE
GH144_GH144	GH144	GH144	1	1374	TRUE
GH144_GH2	GH144	GH2	7	13977	FALSE
GH144_GH2	GH144	GH2	7	13977	FALSE
GH144_GH43_10	GH144	GH43_10	1	1816	FALSE
GH144_GH43_10	GH144	GH43_10	1	1816	FALSE
GH144_GH94	GH144	GH94	9	13745	FALSE
GH144_S1_11	GH144	S1_11	13	21846	FALSE
GH144_S1_11	GH144	S1_11	3	4384	FALSE
GH144_S1_19	GH144	S1_19	11	19476	FALSE
GH144_S1_19	GH144	S1_19	7	11889	FALSE
GH144_S1_19	GH144	S1_19	3	5067	FALSE
GH144_S1_19	GH144	S1_19	2	3566	FALSE
GH144_S1_19	GH144	S1_19	1	1508	FALSE
GH144_S1_8	GH144	S1_8	8	13543	FALSE
GH147_GH2	GH147	GH2	8	11085	FALSE
GH147_GH82	GH147	GH82	1	1666	FALSE
GH149_GH77	GH149	GH77	5	8909	FALSE
GH150_GH150	GH150	GH150	4	7139	TRUE
GH150_GH167	GH150	GH167	73	103718	FALSE
GH150_GH167	GH150	GH167	1	2527	FALSE
GH150_GH167	GH150	GH167	4	11327	FALSE
GH150_GH2	GH150	GH2	3	6767	FALSE
GH150_GH2	GH150	GH2	7	8262	FALSE
GH150_GH2	GH150	GH2	1	3301	FALSE
GH150_GH2	GH150	GH2	12	24378	FALSE
GH150_GH2	GH150	GH2	10	19695	FALSE
GH150_GH2	GH150	GH2	1	2329	FALSE
GH150_GH2	GH150	GH2	1	2920	FALSE
GH150_GH2	GH150	GH2	10	19539	FALSE
GH150_GH2	GH150	GH2	12	24060	FALSE
GH150_GH2	GH150	GH2	2	5238	FALSE
GH150_GH2	GH150	GH2	12	15690	FALSE
GH150_GH2	GH150	GH2	12	16396	FALSE
GH150_GH43_1	GH150	GH43_1	2	3174	FALSE
GH150_GH43_1	GH150	GH43_1	1	3085	FALSE
GH150_GH43_1	GH150	GH43_1	2	3174	FALSE
GH150_GH43_10	GH150	GH43_10	3	9969	FALSE
GH150_GH82	GH150	GH82	8	14744	FALSE
GH150_GH82	GH150	GH82	8	16295	FALSE
GH150_GH82	GH150	GH82	2	4681	FALSE
GH150_GH82	GH150	GH82	2	4128	FALSE
GH150_GH86	GH150	GH86	1	2007	FALSE
GH150_S1_15	GH150	S1_15	1	2678	FALSE
GH150_S1_15	GH150	S1_15	5	9829	FALSE
GH150_S1_15	GH150	S1_15	1	2690	FALSE
GH150_S1_15	GH150	S1_15	1	2689	FALSE
GH150_S1_15	GH150	S1_15	1	1568	FALSE
GH150_S1_15	GH150	S1_15	1	1562	FALSE
GH150_S1_15	GH150	S1_15	1	1568	FALSE
GH150_S1_15	GH150	S1_15	1	1562	FALSE
GH150_S1_15	GH150	S1_15	4	8367	FALSE
GH150_S1_16	GH150	S1_16	3	2089	FALSE
GH150_S1_16	GH150	S1_16	11	21048	FALSE
GH150_S1_16	GH150	S1_16	11	22617	FALSE
GH150_S1_16	GH150	S1_16	1	2763	FALSE
GH150_S1_16	GH150	S1_16	1	1443	FALSE
GH150_S1_17	GH150	S1_17	2	3367	FALSE
GH150_S1_20	GH150	S1_20	3	5019	FALSE
GH150_S1_20	GH150	S1_20	53	69385	FALSE
GH150_S1_20	GH150	S1_20	9	16620	FALSE
GH150_S1_20	GH150	S1_20	9	18072	FALSE
GH150_S1_30	GH150	S1_30	3	5608	FALSE
GH150_S1_30	GH150	S1_30	3	7090	FALSE
GH150_S1_30	GH150	S1_30	1	1548	FALSE
GH150_S1_30	GH150	S1_30	1	1548	FALSE
GH150_S1_8	GH150	S1_8	4	3451	FALSE
GH150_S1_8	GH150	S1_8	5	4950	FALSE
GH150_S1_8	GH150	S1_8	1	1466	FALSE
GH150_S1_8	GH150	S1_8	1	1590	FALSE
GH150_S1_8	GH150	S1_8	7	13346	FALSE
GH150_S1_8	GH150	S1_8	1	2936	FALSE
GH150_S1_8	GH150	S1_8	1	2936	FALSE
GH150_S1_8	GH150	S1_8	3	4203	FALSE
GH150_S1_8	GH150	S1_8	3	4179	FALSE
GH150_S1_8	GH150	S1_8	1	1522	FALSE
GH150_S1_8	GH150	S1_8	7	14819	FALSE
GH150_S1_8	GH150	S1_8	3	4179	FALSE
GH150_S1_8	GH150	S1_8	1	1522	FALSE
GH150_S1_8	GH150	S1_8	3	4166	FALSE
GH150_S1_8	GH150	S1_8	9	10036	FALSE
GH150_S1_8	GH150	S1_8	1	3083	FALSE
GH150_S1_8	GH150	S1_8	3	5684	FALSE
GH150_S1_8	GH150	S1_8	3	5013	FALSE
GH150_S1_8	GH150	S1_8	9	11576	FALSE
GH150_S1_8	GH150	S1_8	3	6914	FALSE
GH150_S1_N.C.	GH150	S1_N.C.	14	29348	FALSE
GH154_PL8_1	GH154	PL8_1	10	10042	FALSE
GH159_GH5_13	GH159	GH5_13	1	1113	FALSE
GH16_1_GH16_13	GH16_1	GH16_13	9	13867	FALSE
GH16_1_GH16_14	GH16_1	GH16_14	3	3963	FALSE
GH16_1_GH16_21	GH16_1	GH16_21	1	1136	FALSE
GH16_1_GH26	GH16_1	GH26	12	26051	FALSE
GH16_1_GH30_1	GH16_1	GH30_1	14	22067	FALSE
GH16_1_GH43_10	GH16_1	GH43_10	3	3413	FALSE
GH16_1_GH43_10	GH16_1	GH43_10	3	3423	FALSE
GH16_1_GH43_10	GH16_1	GH43_10	3	3423	FALSE
GH16_1_GH94	GH16_1	GH94	10	15018	FALSE
GH16_1_S1_11	GH16_1	S1_11	1	1600	FALSE
GH16_1_S1_11	GH16_1	S1_11	1	868	FALSE
GH16_1_S1_11	GH16_1	S1_11	1	868	FALSE
GH16_11_GH16_11	GH16_11	GH16_11	1	1478	TRUE
GH16_11_GH16_11	GH16_11	GH16_11	1	1125	TRUE
GH16_11_GH16_11	GH16_11	GH16_11	1	1872	TRUE
GH16_11_GH16_11	GH16_11	GH16_11	2	1609	TRUE
GH16_11_GH16_11	GH16_11	GH16_11	3	4048	TRUE
GH16_11_GH16_11	GH16_11	GH16_11	1	998	TRUE
GH16_11_GH16_12	GH16_11	GH16_12	1	1314	FALSE
GH16_11_GH16_3	GH16_11	GH16_3	19	28993	FALSE
GH16_11_GH18	GH16_11	GH18	17	24335	FALSE
GH16_11_GH2	GH16_11	GH2	15	19706	FALSE
GH16_11_GH2	GH16_11	GH2	9	19838	FALSE
GH16_11_GH2	GH16_11	GH2	2	2185	FALSE
GH16_11_GH2	GH16_11	GH2	3	3739	FALSE
GH16_11_GH2	GH16_11	GH2	2	2261	FALSE
GH16_11_GH2	GH16_11	GH2	7	12124	FALSE
GH16_11_GH2	GH16_11	GH2	13	20157	FALSE
GH16_11_GH2	GH16_11	GH2	1	2478	FALSE
GH16_11_GH2	GH16_11	GH2	1	2478	FALSE
GH16_11_GH2	GH16_11	GH2	6	12482	FALSE
GH16_11_GH2	GH16_11	GH2	7	14528	FALSE
GH16_11_GH2	GH16_11	GH2	6	13403	FALSE
GH16_11_GH2	GH16_11	GH2	1	2478	FALSE
GH16_11_GH2	GH16_11	GH2	6	13321	FALSE
GH16_11_GH2	GH16_11	GH2	1	1011	FALSE
GH16_11_GH2	GH16_11	GH2	6	12482	FALSE
GH16_11_GH2	GH16_11	GH2	6	14102	FALSE
GH16_11_GH2	GH16_11	GH2	7	15974	FALSE
GH16_11_GH2	GH16_11	GH2	1	1011	FALSE
GH16_11_GH2	GH16_11	GH2	1	3316	FALSE
GH16_11_GH2	GH16_11	GH2	1	2478	FALSE
GH16_11_GH2	GH16_11	GH2	28	31647	FALSE
GH16_11_GH2	GH16_11	GH2	16	19800	FALSE
GH16_11_GH2	GH16_11	GH2	1	2538	FALSE
GH16_11_GH2	GH16_11	GH2	6	7536	FALSE
GH16_11_GH2	GH16_11	GH2	6	12419	FALSE
GH16_11_GH2	GH16_11	GH2	3	5285	FALSE
GH16_11_GH2	GH16_11	GH2	16	19800	FALSE
GH16_11_GH2	GH16_11	GH2	1	2538	FALSE
GH16_11_GH2	GH16_11	GH2	3	4840	FALSE
GH16_11_GH2	GH16_11	GH2	12	21461	FALSE
GH16_11_GH2	GH16_11	GH2	2	4993	FALSE
GH16_11_GH2	GH16_11	GH2	6	12419	FALSE
GH16_11_GH2	GH16_11	GH2	1	3135	FALSE
GH16_11_GH20	GH16_11	GH20	18	26590	FALSE
GH16_11_GH20	GH16_11	GH20	3	5284	FALSE
GH16_11_GH23	GH16_11	GH23	2	4238	FALSE
GH16_11_GH28	GH16_11	GH28	1	1543	FALSE
GH16_11_GH28	GH16_11	GH28	4	5591	FALSE
GH16_11_GH29	GH16_11	GH29	10	21580	FALSE
GH16_11_GH29	GH16_11	GH29	1	1232	FALSE
GH16_11_GH29	GH16_11	GH29	1	1232	FALSE
GH16_11_GH29	GH16_11	GH29	1	1833	FALSE
GH16_11_GH29	GH16_11	GH29	1	1232	FALSE
GH16_11_GH29	GH16_11	GH29	5	11464	FALSE
GH16_11_GH29	GH16_11	GH29	1	948	FALSE
GH16_11_GH29	GH16_11	GH29	1	1833	FALSE
GH16_11_GH29	GH16_11	GH29	2	1326	FALSE
GH16_11_GH29	GH16_11	GH29	3	3053	FALSE
GH16_11_GH29	GH16_11	GH29	13	11298	FALSE
GH16_11_GH29	GH16_11	GH29	1	914	FALSE
GH16_11_GH29	GH16_11	GH29	2	2699	FALSE
GH16_11_GH29	GH16_11	GH29	1	1505	FALSE
GH16_11_GH29	GH16_11	GH29	4	7994	FALSE
GH16_11_GH29	GH16_11	GH29	1	914	FALSE
GH16_11_GH29	GH16_11	GH29	1	1517	FALSE
GH16_11_GH3	GH16_11	GH3	7	11758	FALSE
GH16_11_GH3	GH16_11	GH3	6	9886	FALSE
GH16_11_GH33	GH16_11	GH33	1	1480	FALSE
GH16_11_GH33	GH16_11	GH33	7	10087	FALSE
GH16_11_GH43_10	GH16_11	GH43_10	1	1407	FALSE
GH16_11_GH43_10	GH16_11	GH43_10	2	2885	FALSE
GH16_11_GH43_10	GH16_11	GH43_10	2	3378	FALSE
GH16_11_GH57	GH16_11	GH57	15	19808	FALSE
GH16_11_GH57	GH16_11	GH57	15	19808	FALSE
GH16_11_GH77	GH16_11	GH77	6	13231	FALSE
GH16_11_GH77	GH16_11	GH77	1	1150	FALSE
GH16_11_GH77	GH16_11	GH77	2	2584	FALSE
GH16_11_GH77	GH16_11	GH77	2	2584	FALSE
GH16_11_GH82	GH16_11	GH82	12	19371	FALSE
GH16_11_GH82	GH16_11	GH82	7	10152	FALSE
GH16_11_GH86	GH16_11	GH86	6	10150	FALSE
GH16_11_GH86	GH16_11	GH86	7	11628	FALSE
GH16_11_GH86	GH16_11	GH86	3	4056	FALSE
GH16_11_GH86	GH16_11	GH86	2	2215	FALSE
GH16_11_GH86	GH16_11	GH86	2	2215	FALSE
GH16_11_GH86	GH16_11	GH86	17	25283	FALSE
GH16_11_GH86	GH16_11	GH86	6	10418	FALSE
GH16_11_GH95	GH16_11	GH95	11	18890	FALSE
GH16_11_GT2_Glyco_tranf_2_3	GH16_11	GT2_Glyco_tranf_2_3	19	26871	FALSE
GH16_11_GT2_Glyco_tranf_2_3	GH16_11	GT2_Glyco_tranf_2_3	25	32348	FALSE
GH16_11_GT2_Glyco_tranf_2_3	GH16_11	GT2_Glyco_tranf_2_3	19	26871	FALSE
GH16_11_GT2_Glyco_tranf_2_3	GH16_11	GT2_Glyco_tranf_2_3	25	32348	FALSE
GH16_11_GT4	GH16_11	GT4	14	18524	FALSE
GH16_11_GT4	GH16_11	GT4	14	18524	FALSE
GH16_11_GT4	GH16_11	GT4	9	8786	FALSE
GH16_11_GT4	GH16_11	GT4	11	10395	FALSE
GH16_11_GT4	GH16_11	GT4	9	8927	FALSE
GH16_11_GT4	GH16_11	GT4	11	10669	FALSE
GH16_11_GT5	GH16_11	GT5	10	11226	FALSE
GH16_11_GT5	GH16_11	GT5	10	11226	FALSE
GH16_11_PL6_1	GH16_11	PL6_1	5	6284	FALSE
GH16_11_S1_11	GH16_11	S1_11	2	4955	FALSE
GH16_11_S1_11	GH16_11	S1_11	2	2490	FALSE
GH16_11_S1_11	GH16_11	S1_11	4	4812	FALSE
GH16_11_S1_15	GH16_11	S1_15	16	26582	FALSE
GH16_11_S1_15	GH16_11	S1_15	15	25457	FALSE
GH16_11_S1_15	GH16_11	S1_15	15	25163	FALSE
GH16_11_S1_15	GH16_11	S1_15	16	27035	FALSE
GH16_11_S1_15	GH16_11	S1_15	3	2839	FALSE
GH16_11_S1_15	GH16_11	S1_15	1	1026	FALSE
GH16_11_S1_15	GH16_11	S1_15	1	1026	FALSE
GH16_11_S1_16	GH16_11	S1_16	8	13770	FALSE
GH16_11_S1_16	GH16_11	S1_16	5	8041	FALSE
GH16_11_S1_16	GH16_11	S1_16	2	2624	FALSE
GH16_11_S1_16	GH16_11	S1_16	7	12340	FALSE
GH16_11_S1_16	GH16_11	S1_16	10	17623	FALSE
GH16_11_S1_17	GH16_11	S1_17	3	6361	FALSE
GH16_11_S1_17	GH16_11	S1_17	3	5557	FALSE
GH16_11_S1_17	GH16_11	S1_17	17	19123	FALSE
GH16_11_S1_17	GH16_11	S1_17	1	924	FALSE
GH16_11_S1_19	GH16_11	S1_19	2	2302	FALSE
GH16_11_S1_19	GH16_11	S1_19	1	824	FALSE
GH16_11_S1_19	GH16_11	S1_19	1	904	FALSE
GH16_11_S1_19	GH16_11	S1_19	15	25141	FALSE
GH16_11_S1_19	GH16_11	S1_19	14	24016	FALSE
GH16_11_S1_19	GH16_11	S1_19	1	904	FALSE
GH16_11_S1_19	GH16_11	S1_19	14	23602	FALSE
GH16_11_S1_19	GH16_11	S1_19	15	25474	FALSE
GH16_11_S1_19	GH16_11	S1_19	1	904	FALSE
GH16_11_S1_19	GH16_11	S1_19	1	910	FALSE
GH16_11_S1_19	GH16_11	S1_19	16	17323	FALSE
GH16_11_S1_24	GH16_11	S1_24	3	6222	FALSE
GH16_11_S1_24	GH16_11	S1_24	4	9699	FALSE
GH16_11_S1_24	GH16_11	S1_24	18	20765	FALSE
GH16_11_S1_24	GH16_11	S1_24	24	25254	FALSE
GH16_11_S1_25	GH16_11	S1_25	3	8031	FALSE
GH16_11_S1_29	GH16_11	S1_29	3	2415	FALSE
GH16_11_S1_4	GH16_11	S1_4	2	2438	FALSE
GH16_11_S1_51	GH16_11	S1_51	2	2115	FALSE
GH16_11_S1_51	GH16_11	S1_51	2	4344	FALSE
GH16_11_S1_51	GH16_11	S1_51	2	4344	FALSE
GH16_11_S1_7	GH16_11	S1_7	16	29180	FALSE
GH16_11_S1_72	GH16_11	S1_72	6	12913	FALSE
GH16_11_S1_72	GH16_11	S1_72	5	10975	FALSE
GH16_11_S1_72	GH16_11	S1_72	2	4534	FALSE
GH16_11_S1_72	GH16_11	S1_72	2	4493	FALSE
GH16_11_S1_72	GH16_11	S1_72	2	4534	FALSE
GH16_11_S1_72	GH16_11	S1_72	2	3659	FALSE
GH16_11_S1_72	GH16_11	S1_72	2	3652	FALSE
GH16_11_S1_72	GH16_11	S1_72	6	8156	FALSE
GH16_11_S1_8	GH16_11	S1_8	8	11645	FALSE
GH16_12_GH2	GH16_12	GH2	1	1096	FALSE
GH16_12_GH43	GH16_12	GH43	1	977	FALSE
GH16_12_GH82	GH16_12	GH82	6	12354	FALSE
GH16_12_PL40	GH16_12	PL40	2	3479	FALSE
GH16_13_GH2	GH16_13	GH2	11	15256	FALSE
GH16_13_GH2	GH16_13	GH2	3	4055	FALSE
GH16_13_GH3	GH16_13	GH3	2	1747	FALSE
GH16_13_GH3	GH16_13	GH3	2	3113	FALSE
GH16_13_GH43_1	GH16_13	GH43_1	1	767	FALSE
GH16_13_GH43_1	GH16_13	GH43_1	1	866	FALSE
GH16_13_GH43_1	GH16_13	GH43_1	1	726	FALSE
GH16_13_GH43_1	GH16_13	GH43_1	1	912	FALSE
GH16_13_GH43_10	GH16_13	GH43_10	2	1683	FALSE
GH16_13_GH5_22	GH16_13	GH5_22	2	2250	FALSE
GH16_13_GH57	GH16_13	GH57	61	75981	FALSE
[truncated: 3,237 more rows]

## Sheet: all rum cazy-sulf pairs 
pairname	term1	term2	gene_distance	nucleotide_distance	self - match
CBM26_CBM26	CBM26	CBM26	2	2835	TRUE
CBM26_CBM26	CBM26	CBM26	3	6191	TRUE
CBM26_CBM26	CBM26	CBM26	5	9026	TRUE
CBM32_CBM32	CBM32	CBM32	1	2575	TRUE
CBM32_CBM32	CBM32	CBM32	15	24127	TRUE
CBM32_CBM32	CBM32	CBM32	17	30809	TRUE
CBM32_CBM32	CBM32	CBM32	2	3003	TRUE
CBM32_CBM32	CBM32	CBM32	2	3340	TRUE
CBM32_CBM32	CBM32	CBM32	2	3647	TRUE
CBM32_CBM32	CBM32	CBM32	2	6682	TRUE
CBM32_CBM32	CBM32	CBM32	3	6886	TRUE
CBM32_CBM32	CBM32	CBM32	4	3796	TRUE
CBM32_CBM32	CBM32	CBM32	6	7443	TRUE
CBM50_CBM50	CBM50	CBM50	12	13161	TRUE
CBM61_CBM61	CBM61	CBM61	62	94266	TRUE
CBM61_CBM61	CBM61	CBM61	65	93291	TRUE
CBM62_CBM62	CBM62	CBM62	1	2372	TRUE
CBM62_CBM62	CBM62	CBM62	4	8146	TRUE
CE1_CE1	CE1	CE1	1	1101	TRUE
CE1_CE1	CE1	CE1	1	1103	TRUE
CE1_CE1	CE1	CE1	1	1131	TRUE
CE1_CE1	CE1	CE1	1	1133	TRUE
CE1_CE1	CE1	CE1	1	1142	TRUE
CE1_CE1	CE1	CE1	1	1175	TRUE
CE1_CE1	CE1	CE1	1	1175	TRUE
CE1_CE1	CE1	CE1	1	1199	TRUE
CE1_CE1	CE1	CE1	1	1273	TRUE
CE1_CE1	CE1	CE1	1	1304	TRUE
CE1_CE1	CE1	CE1	1	1395	TRUE
CE1_CE1	CE1	CE1	1	1477	TRUE
CE1_CE1	CE1	CE1	1	1479	TRUE
CE1_CE1	CE1	CE1	1	1781	TRUE
CE1_CE1	CE1	CE1	1	1936	TRUE
CE1_CE1	CE1	CE1	1	2330	TRUE
CE1_CE1	CE1	CE1	1	768	TRUE
CE1_CE1	CE1	CE1	1	788	TRUE
CE1_CE1	CE1	CE1	1	841	TRUE
CE1_CE1	CE1	CE1	1	844	TRUE
CE1_CE1	CE1	CE1	1	895	TRUE
CE1_CE1	CE1	CE1	10	16885	TRUE
CE1_CE1	CE1	CE1	109	120994	TRUE
CE1_CE1	CE1	CE1	11	11067	TRUE
CE1_CE1	CE1	CE1	11	12516	TRUE
CE1_CE1	CE1	CE1	11	18016	TRUE
CE1_CE1	CE1	CE1	11	18158	TRUE
CE1_CE1	CE1	CE1	12	13619	TRUE
CE1_CE1	CE1	CE1	12	19289	TRUE
CE1_CE1	CE1	CE1	135	153661	TRUE
CE1_CE1	CE1	CE1	15	13831	TRUE
CE1_CE1	CE1	CE1	15	18569	TRUE
CE1_CE1	CE1	CE1	166	199662	TRUE
CE1_CE1	CE1	CE1	181	213493	TRUE
CE1_CE1	CE1	CE1	2	1436	TRUE
CE1_CE1	CE1	CE1	2	2016	TRUE
CE1_CE1	CE1	CE1	2	2645	TRUE
CE1_CE1	CE1	CE1	2	2737	TRUE
CE1_CE1	CE1	CE1	2	3597	TRUE
CE1_CE1	CE1	CE1	2	3767	TRUE
CE1_CE1	CE1	CE1	2	4789	TRUE
CE1_CE1	CE1	CE1	26	31403	TRUE
CE1_CE1	CE1	CE1	27	25707	TRUE
CE1_CE1	CE1	CE1	29	27217	TRUE
CE1_CE1	CE1	CE1	3	2962	TRUE
CE1_CE1	CE1	CE1	3	3868	TRUE
CE1_CE1	CE1	CE1	3	3957	TRUE
CE1_CE1	CE1	CE1	3	4432	TRUE
CE1_CE1	CE1	CE1	3	4950	TRUE
CE1_CE1	CE1	CE1	3	5074	TRUE
CE1_CE1	CE1	CE1	3	5957	TRUE
CE1_CE1	CE1	CE1	3	6385	TRUE
CE1_CE1	CE1	CE1	33	40708	TRUE
CE1_CE1	CE1	CE1	38	47728	TRUE
CE1_CE1	CE1	CE1	4	10244	TRUE
CE1_CE1	CE1	CE1	4	3051	TRUE
CE1_CE1	CE1	CE1	4	3542	TRUE
CE1_CE1	CE1	CE1	4	4801	TRUE
CE1_CE1	CE1	CE1	4	5156	TRUE
CE1_CE1	CE1	CE1	4	5705	TRUE
CE1_CE1	CE1	CE1	4	6053	TRUE
CE1_CE1	CE1	CE1	4	7518	TRUE
CE1_CE1	CE1	CE1	4	7931	TRUE
CE1_CE1	CE1	CE1	4	8244	TRUE
CE1_CE1	CE1	CE1	46	48138	TRUE
CE1_CE1	CE1	CE1	5	11266	TRUE
CE1_CE1	CE1	CE1	5	5142	TRUE
CE1_CE1	CE1	CE1	5	5255	TRUE
CE1_CE1	CE1	CE1	5	5387	TRUE
CE1_CE1	CE1	CE1	5	6000	TRUE
CE1_CE1	CE1	CE1	5	8812	TRUE
CE1_CE1	CE1	CE1	5	9249	TRUE
CE1_CE1	CE1	CE1	5	9716	TRUE
CE1_CE1	CE1	CE1	55	62988	TRUE
CE1_CE1	CE1	CE1	56	75765	TRUE
CE1_CE1	CE1	CE1	6	10144	TRUE
CE1_CE1	CE1	CE1	6	6175	TRUE
CE1_CE1	CE1	CE1	6	6317	TRUE
CE1_CE1	CE1	CE1	6	8180	TRUE
CE1_CE1	CE1	CE1	65	82519	TRUE
CE1_CE1	CE1	CE1	66	83718	TRUE
CE1_CE1	CE1	CE1	69	87675	TRUE
CE1_CE1	CE1	CE1	7	12453	TRUE
CE1_CE1	CE1	CE1	7	7158	TRUE
CE1_CE1	CE1	CE1	7	8051	TRUE
CE1_CE1	CE1	CE1	7	9305	TRUE
CE1_CE1	CE1	CE1	7	9333	TRUE
CE1_CE1	CE1	CE1	70	88519	TRUE
CE1_CE1	CE1	CE1	8	13584	TRUE
CE1_CE1	CE1	CE1	8	14148	TRUE
CE1_CE1	CE1	CE1	83	101847	TRUE
CE1_CE1	CE1	CE1	9	11330	TRUE
CE1_CE1	CE1	CE1	9	15421	TRUE
CE1_CE1	CE1	CE1	91	101853	TRUE
CE12_CE12	CE12	CE12	1	1250	TRUE
CE12_CE12	CE12	CE12	1	1863	TRUE
CE12_CE12	CE12	CE12	1	1912	TRUE
CE12_CE12	CE12	CE12	1	2202	TRUE
CE12_CE12	CE12	CE12	1	377	TRUE
CE12_CE12	CE12	CE12	1	759	TRUE
CE12_CE12	CE12	CE12	121	156905	TRUE
CE12_CE12	CE12	CE12	14	23709	TRUE
CE12_CE12	CE12	CE12	14	25769	TRUE
CE12_CE12	CE12	CE12	15	26528	TRUE
CE12_CE12	CE12	CE12	4	7815	TRUE
CE12_CE12	CE12	CE12	4	8795	TRUE
CE12_CE12	CE12	CE12	53	70854	TRUE
CE12_CE12	CE12	CE12	59	68611	TRUE
CE14_CE14	CE14	CE14	1	697	TRUE
CE2_CE2	CE2	CE2	1	673	TRUE
CE2_CE2	CE2	CE2	16	26695	TRUE
CE4_CE4	CE4	CE4	101	113967	TRUE
CE4_CE4	CE4	CE4	13	12436	TRUE
CE4_CE4	CE4	CE4	15	13330	TRUE
CE4_CE4	CE4	CE4	16	16876	TRUE
CE4_CE4	CE4	CE4	3	4440	TRUE
CE4_CE4	CE4	CE4	4	6573	TRUE
CE7_CE7	CE7	CE7	15	17310	TRUE
CE8_CE8	CE8	CE8	1	1086	TRUE
CE8_CE8	CE8	CE8	1	2975	TRUE
CE8_CE8	CE8	CE8	10	20733	TRUE
CE8_CE8	CE8	CE8	12	20246	TRUE
CE8_CE8	CE8	CE8	15	20212	TRUE
CE8_CE8	CE8	CE8	16	21298	TRUE
CE9_CE9	CE9	CE9	1	1205	TRUE
CE9_CE9	CE9	CE9	4	5827	TRUE
GH1_GH1	GH1	GH1	1	1415	TRUE
GH1_GH1	GH1	GH1	1	1489	TRUE
GH1_GH1	GH1	GH1	1	1514	TRUE
GH1_GH1	GH1	GH1	1	1548	TRUE
GH1_GH1	GH1	GH1	1	544	TRUE
GH1_GH1	GH1	GH1	179	182653	TRUE
GH1_GH1	GH1	GH1	180	184142	TRUE
GH1_GH1	GH1	GH1	180	184167	TRUE
GH1_GH1	GH1	GH1	181	185656	TRUE
GH1_GH1	GH1	GH1	181	185690	TRUE
GH1_GH1	GH1	GH1	182	187204	TRUE
GH1_GH1	GH1	GH1	2	3037	TRUE
GH10_GH10	GH10	GH10	2	4229	TRUE
GH10_GH10	GH10	GH10	2	4258	TRUE
GH10_GH10	GH10	GH10	7	12066	TRUE
GH10_GH10	GH10	GH10	8	13764	TRUE
GH105_GH105	GH105	GH105	11	16314	TRUE
GH106_GH106	GH106	GH106	1	1960	TRUE
GH106_GH106	GH106	GH106	1	828	TRUE
GH106_GH106	GH106	GH106	10	17823	TRUE
GH106_GH106	GH106	GH106	9	16995	TRUE
GH109_GH109	GH109	GH109	1	1023	TRUE
GH109_GH109	GH109	GH109	1	1115	TRUE
GH109_GH109	GH109	GH109	2	1668	TRUE
GH109_GH109	GH109	GH109	2	1851	TRUE
GH109_GH109	GH109	GH109	2	1883	TRUE
GH109_GH109	GH109	GH109	21	40193	TRUE
GH109_GH109	GH109	GH109	3	3309	TRUE
GH109_GH109	GH109	GH109	33	60241	TRUE
GH109_GH109	GH109	GH109	4	3398	TRUE
GH109_GH109	GH109	GH109	4	3731	TRUE
GH109_GH109	GH109	GH109	5	4923	TRUE
GH115_GH115	GH115	GH115	1	2362	TRUE
GH115_GH115	GH115	GH115	5	8970	TRUE
GH115_GH115	GH115	GH115	6	15569	TRUE
GH115_GH115	GH115	GH115	67	110304	TRUE
GH115_GH115	GH115	GH115	7	17931	TRUE
GH128_GH128	GH128	GH128	1	2921	TRUE
GH128_GH128	GH128	GH128	4	6129	TRUE
GH13_GH13	GH13	GH13	1	1337	TRUE
GH13_GH13	GH13	GH13	1	1380	TRUE
GH13_GH13	GH13	GH13	1	1386	TRUE
GH13_GH13	GH13	GH13	1	1435	TRUE
GH13_GH13	GH13	GH13	1	1447	TRUE
GH13_GH13	GH13	GH13	1	1478	TRUE
GH13_GH13	GH13	GH13	1	1511	TRUE
GH13_GH13	GH13	GH13	1	1512	TRUE
GH13_GH13	GH13	GH13	1	1530	TRUE
GH13_GH13	GH13	GH13	1	1618	TRUE
GH13_GH13	GH13	GH13	1	1831	TRUE
GH13_GH13	GH13	GH13	1	1923	TRUE
GH13_GH13	GH13	GH13	1	1966	TRUE
GH13_GH13	GH13	GH13	1	1974	TRUE
GH13_GH13	GH13	GH13	1	1979	TRUE
GH13_GH13	GH13	GH13	1	1982	TRUE
GH13_GH13	GH13	GH13	1	1995	TRUE
GH13_GH13	GH13	GH13	1	2049	TRUE
GH13_GH13	GH13	GH13	1	2244	TRUE
GH13_GH13	GH13	GH13	12	20481	TRUE
GH13_GH13	GH13	GH13	2	2229	TRUE
GH13_GH13	GH13	GH13	2	2441	TRUE
GH13_GH13	GH13	GH13	2	3211	TRUE
GH13_GH13	GH13	GH13	2	4167	TRUE
GH13_GH13	GH13	GH13	3	5677	TRUE
GH13_GH13	GH13	GH13	4	5031	TRUE
GH13_GH13	GH13	GH13	47	52632	TRUE
GH13_GH13	GH13	GH13	7	13701	TRUE
GH13_GH13	GH13	GH13	8	15829	TRUE
GH130_GH130	GH130	GH130	1	1169	TRUE
GH130_GH130	GH130	GH130	23	42450	TRUE
GH138_GH138	GH138	GH138	1	1106	TRUE
GH138_GH138	GH138	GH138	1	1285	TRUE
GH13_14_GH13_14	GH13_14	GH13_14	1	2711	TRUE
GH13_14_GH13_14	GH13_14	GH13_14	1	2932	TRUE
GH13_14_GH13_14	GH13_14	GH13_14	1	2980	TRUE
GH13_14_GH13_14	GH13_14	GH13_14	1	3198	TRUE
GH13_14_GH13_14	GH13_14	GH13_14	2	3384	TRUE
GH13_28_GH13_28	GH13_28	GH13_28	1	1895	TRUE
GH13_29_GH13_29	GH13_29	GH13_29	1	1040	TRUE
GH13_31_GH13_31	GH13_31	GH13_31	1	779	TRUE
GH13_31_GH13_31	GH13_31	GH13_31	2	3139	TRUE
GH13_31_GH13_31	GH13_31	GH13_31	2	3190	TRUE
GH13_31_GH13_31	GH13_31	GH13_31	2	3219	TRUE
GH13_31_GH13_31	GH13_31	GH13_31	4	4984	TRUE
GH13_6_GH13_6	GH13_6	GH13_6	1	1775	TRUE
GH13_6_GH13_6	GH13_6	GH13_6	1	1813	TRUE
GH13_6_GH13_6	GH13_6	GH13_6	1	1841	TRUE
GH13_6_GH13_6	GH13_6	GH13_6	1	1848	TRUE
GH13_6_GH13_6	GH13_6	GH13_6	1	1849	TRUE
GH13_6_GH13_6	GH13_6	GH13_6	1	1855	TRUE
GH13_6_GH13_6	GH13_6	GH13_6	1	1864	TRUE
GH13_6_GH13_6	GH13_6	GH13_6	2	2746	TRUE
GH13_6_GH13_6	GH13_6	GH13_6	2	2781	TRUE
GH13_6_GH13_6	GH13_6	GH13_6	2	3704	TRUE
GH13_6_GH13_6	GH13_6	GH13_6	2	3712	TRUE
GH141_GH141	GH141	GH141	18	35536	TRUE
GH141_GH141	GH141	GH141	23	37285	TRUE
GH141_GH141	GH141	GH141	5	8976	TRUE
GH141_GH141	GH141	GH141	7	9923	TRUE
GH144_GH144	GH144	GH144	4	7073	TRUE
GH146_GH146	GH146	GH146	1	953	TRUE
GH146_GH146	GH146	GH146	2	3352	TRUE
GH146_GH146	GH146	GH146	21	25264	TRUE
GH149_GH149	GH149	GH149	1	2059	TRUE
GH161_GH161	GH161	GH161	1	1139	TRUE
GH16_3_GH16_3	GH16_3	GH16_3	1	1019	TRUE
GH16_3_GH16_3	GH16_3	GH16_3	1	1071	TRUE
GH16_3_GH16_3	GH16_3	GH16_3	1	1094	TRUE
GH16_3_GH16_3	GH16_3	GH16_3	1	1164	TRUE
GH16_3_GH16_3	GH16_3	GH16_3	1	1483	TRUE
GH16_3_GH16_3	GH16_3	GH16_3	1	1493	TRUE
GH16_3_GH16_3	GH16_3	GH16_3	1	1529	TRUE
GH16_3_GH16_3	GH16_3	GH16_3	1	609	TRUE
GH16_3_GH16_3	GH16_3	GH16_3	1	749	TRUE
GH16_3_GH16_3	GH16_3	GH16_3	1	848	TRUE
GH16_3_GH16_3	GH16_3	GH16_3	1	926	TRUE
GH16_3_GH16_3	GH16_3	GH16_3	12	22853	TRUE
GH16_3_GH16_3	GH16_3	GH16_3	2	1535	TRUE
GH16_3_GH16_3	GH16_3	GH16_3	2	2160	TRUE
GH16_3_GH16_3	GH16_3	GH16_3	2	2283	TRUE
GH16_3_GH16_3	GH16_3	GH16_3	2	2347	TRUE
GH16_3_GH16_3	GH16_3	GH16_3	2	2539	TRUE
GH16_3_GH16_3	GH16_3	GH16_3	2	2546	TRUE
GH16_3_GH16_3	GH16_3	GH16_3	2	2558	TRUE
GH16_3_GH16_3	GH16_3	GH16_3	2	2597	TRUE
GH16_3_GH16_3	GH16_3	GH16_3	2	2844	TRUE
GH16_3_GH16_3	GH16_3	GH16_3	3	3324	TRUE
GH16_3_GH16_3	GH16_3	GH16_3	3	3366	TRUE
GH16_3_GH16_3	GH16_3	GH16_3	3	3472	TRUE
GH16_3_GH16_3	GH16_3	GH16_3	3	3938	TRUE
GH16_3_GH16_3	GH16_3	GH16_3	3	4068	TRUE
GH16_3_GH16_3	GH16_3	GH16_3	3	4090	TRUE
GH16_3_GH16_3	GH16_3	GH16_3	4	4081	TRUE
GH16_3_GH16_3	GH16_3	GH16_3	4	4718	TRUE
GH16_3_GH16_3	GH16_3	GH16_3	5	5882	TRUE
GH18_GH18	GH18	GH18	1	2166	TRUE
GH18_GH18	GH18	GH18	10	21647	TRUE
GH18_GH18	GH18	GH18	11	19249	TRUE
GH18_GH18	GH18	GH18	12	21415	TRUE
GH18_GH18	GH18	GH18	3	4079	TRUE
GH18_GH18	GH18	GH18	8	15675	TRUE
GH2_GH2	GH2	GH2	1	1039	TRUE
GH2_GH2	GH2	GH2	1	1875	TRUE
GH2_GH2	GH2	GH2	1	2021	TRUE
GH2_GH2	GH2	GH2	1	2647	TRUE
GH2_GH2	GH2	GH2	1	2682	TRUE
GH2_GH2	GH2	GH2	1	2685	TRUE
GH2_GH2	GH2	GH2	1	2734	TRUE
GH2_GH2	GH2	GH2	1	2825	TRUE
GH2_GH2	GH2	GH2	1	2884	TRUE
GH2_GH2	GH2	GH2	1	3241	TRUE
GH2_GH2	GH2	GH2	1	917	TRUE
GH2_GH2	GH2	GH2	10	23546	TRUE
GH2_GH2	GH2	GH2	11	13688	TRUE
GH2_GH2	GH2	GH2	11	21749	TRUE
GH2_GH2	GH2	GH2	11	23956	TRUE
GH2_GH2	GH2	GH2	114	129158	TRUE
GH2_GH2	GH2	GH2	116	140966	TRUE
GH2_GH2	GH2	GH2	14	27122	TRUE
GH2_GH2	GH2	GH2	14	29308	TRUE
GH2_GH2	GH2	GH2	15	20309	TRUE
GH2_GH2	GH2	GH2	2	2138	TRUE
GH2_GH2	GH2	GH2	2	3140	TRUE
GH2_GH2	GH2	GH2	2	4522	TRUE
GH2_GH2	GH2	GH2	2	4832	TRUE
GH2_GH2	GH2	GH2	2	5351	TRUE
GH2_GH2	GH2	GH2	243	316531	TRUE
GH2_GH2	GH2	GH2	246	324320	TRUE
GH2_GH2	GH2	GH2	25	23220	TRUE
GH2_GH2	GH2	GH2	3	5203	TRUE
GH2_GH2	GH2	GH2	3	5291	TRUE
GH2_GH2	GH2	GH2	3	5330	TRUE
GH2_GH2	GH2	GH2	3	5352	TRUE
GH2_GH2	GH2	GH2	3	5373	TRUE
GH2_GH2	GH2	GH2	3	5963	TRUE
GH2_GH2	GH2	GH2	3	6606	TRUE
GH2_GH2	GH2	GH2	3	7124	TRUE
GH2_GH2	GH2	GH2	3	7789	TRUE
GH2_GH2	GH2	GH2	3	8403	TRUE
GH2_GH2	GH2	GH2	31	44039	TRUE
GH2_GH2	GH2	GH2	316	388064	TRUE
GH2_GH2	GH2	GH2	36	40158	TRUE
GH2_GH2	GH2	GH2	4	10048	TRUE
GH2_GH2	GH2	GH2	4	6437	TRUE
GH2_GH2	GH2	GH2	4	8444	TRUE
GH2_GH2	GH2	GH2	5	6782	TRUE
GH2_GH2	GH2	GH2	6	10103	TRUE
GH2_GH2	GH2	GH2	6	11540	TRUE
GH2_GH2	GH2	GH2	6	13270	TRUE
GH2_GH2	GH2	GH2	7	13348	TRUE
GH2_GH2	GH2	GH2	7	13415	TRUE
GH2_GH2	GH2	GH2	7	15917	TRUE
GH2_GH2	GH2	GH2	7	16004	TRUE
GH2_GH2	GH2	GH2	7	16654	TRUE
GH2_GH2	GH2	GH2	8	18651	TRUE
GH2_GH2	GH2	GH2	8	19024	TRUE
GH2_GH2	GH2	GH2	8	20322	TRUE
GH2_GH2	GH2	GH2	90	128678	TRUE
GH20_GH20	GH20	GH20	1	931	TRUE
GH23_GH23	GH23	GH23	1	1249	TRUE
GH23_GH23	GH23	GH23	27	23997	TRUE
GH25_GH25	GH25	GH25	1	1844	TRUE
GH25_GH25	GH25	GH25	1	727	TRUE
GH25_GH25	GH25	GH25	1	760	TRUE
GH25_GH25	GH25	GH25	1	794	TRUE
GH25_GH25	GH25	GH25	3	3284	TRUE
GH25_GH25	GH25	GH25	31	25785	TRUE
GH25_GH25	GH25	GH25	32	51419	TRUE
GH25_GH25	GH25	GH25	6	4487	TRUE
GH25_GH25	GH25	GH25	69	73707	TRUE
GH26_GH26	GH26	GH26	1	1015	TRUE
GH26_GH26	GH26	GH26	1	1105	TRUE
GH26_GH26	GH26	GH26	1	1130	TRUE
GH26_GH26	GH26	GH26	1	1233	TRUE
GH26_GH26	GH26	GH26	1	1330	TRUE
GH26_GH26	GH26	GH26	1	1682	TRUE
GH26_GH26	GH26	GH26	15	18149	TRUE
GH26_GH26	GH26	GH26	2	2945	TRUE
GH26_GH26	GH26	GH26	2	3036	TRUE
GH26_GH26	GH26	GH26	2	3764	TRUE
GH26_GH26	GH26	GH26	2	4412	TRUE
GH26_GH26	GH26	GH26	3	3018	TRUE
GH26_GH26	GH26	GH26	3	3896	TRUE
GH26_GH26	GH26	GH26	3	4165	TRUE
GH26_GH26	GH26	GH26	4	6773	TRUE
GH26_GH26	GH26	GH26	5	5282	TRUE
GH26_GH26	GH26	GH26	5	8006	TRUE
GH26_GH26	GH26	GH26	6	10798	TRUE
GH26_GH26	GH26	GH26	6	10952	TRUE
GH26_GH26	GH26	GH26	7	13604	TRUE
GH26_GH26	GH26	GH26	7	16246	TRUE
GH26_GH26	GH26	GH26	8	13541	TRUE
GH26_GH26	GH26	GH26	8	17376	TRUE
GH26_GH26	GH26	GH26	9	15223	TRUE
GH27_GH27	GH27	GH27	1	578	TRUE
GH27_GH27	GH27	GH27	12	22586	TRUE
GH28_GH28	GH28	GH28	1	1429	TRUE
GH28_GH28	GH28	GH28	1	1500	TRUE
GH28_GH28	GH28	GH28	1	1505	TRUE
GH28_GH28	GH28	GH28	1	2099	TRUE
GH28_GH28	GH28	GH28	10	18690	TRUE
GH28_GH28	GH28	GH28	11	14084	TRUE
GH28_GH28	GH28	GH28	12	17620	TRUE
GH28_GH28	GH28	GH28	135	156779	TRUE
GH28_GH28	GH28	GH28	139	165824	TRUE
GH28_GH28	GH28	GH28	14	19065	TRUE
GH28_GH28	GH28	GH28	140	167923	TRUE
GH28_GH28	GH28	GH28	15	20494	TRUE
GH28_GH28	GH28	GH28	2	5606	TRUE
GH28_GH28	GH28	GH28	233	234881	TRUE
GH28_GH28	GH28	GH28	250	295518	TRUE
GH28_GH28	GH28	GH28	3	6839	TRUE
GH28_GH28	GH28	GH28	30	44262	TRUE
GH28_GH28	GH28	GH28	368	391660	TRUE
GH28_GH28	GH28	GH28	372	400705	TRUE
GH28_GH28	GH28	GH28	373	402804	TRUE
GH28_GH28	GH28	GH28	4	5021	TRUE
GH28_GH28	GH28	GH28	4	9045	TRUE
GH28_GH28	GH28	GH28	41	58346	TRUE
GH28_GH28	GH28	GH28	5	11144	TRUE
GH28_GH28	GH28	GH28	6	12184	TRUE
GH28_GH28	GH28	GH28	6	4891	TRUE
GH28_GH28	GH28	GH28	6	6666	TRUE
GH28_GH28	GH28	GH28	7	6320	TRUE
GH28_GH28	GH28	GH28	8	13722	TRUE
GH28_GH28	GH28	GH28	8	14174	TRUE
GH28_GH28	GH28	GH28	8	14922	TRUE
GH29_GH29	GH29	GH29	16	22691	TRUE
GH3_GH3	GH3	GH3	1	2080	TRUE
GH3_GH3	GH3	GH3	1	2123	TRUE
GH3_GH3	GH3	GH3	1	2268	TRUE
GH3_GH3	GH3	GH3	1	2329	TRUE
GH3_GH3	GH3	GH3	1	2330	TRUE
GH3_GH3	GH3	GH3	1	2352	TRUE
GH3_GH3	GH3	GH3	1	2362	TRUE
GH3_GH3	GH3	GH3	1	2363	TRUE
GH3_GH3	GH3	GH3	1	2363	TRUE
GH3_GH3	GH3	GH3	1	2565	TRUE
GH3_GH3	GH3	GH3	1	2700	TRUE
GH3_GH3	GH3	GH3	1	2814	TRUE
GH3_GH3	GH3	GH3	10	10882	TRUE
GH3_GH3	GH3	GH3	10	19244	TRUE
GH3_GH3	GH3	GH3	10	19423	TRUE
GH3_GH3	GH3	GH3	10	20849	TRUE
GH3_GH3	GH3	GH3	13	16671	TRUE
GH3_GH3	GH3	GH3	13	27551	TRUE
GH3_GH3	GH3	GH3	14	13387	TRUE
GH3_GH3	GH3	GH3	17	15017	TRUE
GH3_GH3	GH3	GH3	17	21921	TRUE
GH3_GH3	GH3	GH3	2	3676	TRUE
GH3_GH3	GH3	GH3	2	4922	TRUE
GH3_GH3	GH3	GH3	20	21699	TRUE
GH3_GH3	GH3	GH3	22	45407	TRUE
GH3_GH3	GH3	GH3	24	25724	TRUE
GH3_GH3	GH3	GH3	24	28617	TRUE
GH3_GH3	GH3	GH3	3	4213	TRUE
GH3_GH3	GH3	GH3	3	4507	TRUE
GH3_GH3	GH3	GH3	3	4765	TRUE
GH3_GH3	GH3	GH3	3	6702	TRUE
GH3_GH3	GH3	GH3	34	36938	TRUE
GH3_GH3	GH3	GH3	36	47487	TRUE
GH3_GH3	GH3	GH3	39	45428	TRUE
GH3_GH3	GH3	GH3	46	58762	TRUE
GH3_GH3	GH3	GH3	47	61030	TRUE
GH3_GH3	GH3	GH3	5	10775	TRUE
GH3_GH3	GH3	GH3	5	9484	TRUE
GH3_GH3	GH3	GH3	53	77582	TRUE
GH3_GH3	GH3	GH3	54	79945	TRUE
GH3_GH3	GH3	GH3	6	8312	TRUE
GH3_GH3	GH3	GH3	7	11567	TRUE
GH3_GH3	GH3	GH3	79	106911	TRUE
GH3_GH3	GH3	GH3	8	13098	TRUE
GH3_GH3	GH3	GH3	9	12403	TRUE
GH30_3_GH30_3	GH30_3	GH30_3	5	8033	TRUE
GH30_4_GH30_4	GH30_4	GH30_4	1	1565	TRUE
GH30_4_GH30_4	GH30_4	GH30_4	1	1688	TRUE
GH31_GH31	GH31	GH31	1	1703	TRUE
GH31_GH31	GH31	GH31	1	2297	TRUE
GH31_GH31	GH31	GH31	1	2384	TRUE
GH31_GH31	GH31	GH31	1	2419	TRUE
GH31_GH31	GH31	GH31	1	2498	TRUE
GH31_GH31	GH31	GH31	11	23769	TRUE
GH31_GH31	GH31	GH31	12	17503	TRUE
GH31_GH31	GH31	GH31	13	21848	TRUE
GH31_GH31	GH31	GH31	2	2056	TRUE
GH31_GH31	GH31	GH31	2	3713	TRUE
GH31_GH31	GH31	GH31	2	5461	TRUE
GH31_GH31	GH31	GH31	3	7266	TRUE
GH32_GH32	GH32	GH32	1	1576	TRUE
GH32_GH32	GH32	GH32	1	1622	TRUE
GH32_GH32	GH32	GH32	1	1725	TRUE
GH32_GH32	GH32	GH32	1	1731	TRUE
GH32_GH32	GH32	GH32	1	2443	TRUE
GH32_GH32	GH32	GH32	1	767	TRUE
GH32_GH32	GH32	GH32	1	853	TRUE
GH32_GH32	GH32	GH32	1	944	TRUE
GH32_GH32	GH32	GH32	2	2258	TRUE
GH32_GH32	GH32	GH32	2	2487	TRUE
GH32_GH32	GH32	GH32	2	2648	TRUE
GH32_GH32	GH32	GH32	4	6785	TRUE
GH32_GH32	GH32	GH32	5	6742	TRUE
GH32_GH32	GH32	GH32	6	10121	TRUE
GH32_GH32	GH32	GH32	6	10964	TRUE
GH33_GH33	GH33	GH33	1	2975	TRUE
GH33_GH33	GH33	GH33	16	26654	TRUE
GH35_GH35	GH35	GH35	175	248705	TRUE
GH36_GH36	GH36	GH36	1	1968	TRUE
GH38_GH38	GH38	GH38	6	6576	TRUE
GH38_GH38	GH38	GH38	8	18126	TRUE
GH42_GH42	GH42	GH42	1	1703	TRUE
GH43_10_GH43_10	GH43_10	GH43_10	1	362	TRUE
GH43_10_GH43_10	GH43_10	GH43_10	1	4668	TRUE
GH43_2_GH43_2	GH43_2	GH43_2	12	19196	TRUE
GH43_24_GH43_24	GH43_24	GH43_24	4	7859	TRUE
GH43_28_GH43_28	GH43_28	GH43_28	1	1081	TRUE
GH43_29_GH43_29	GH43_29	GH43_29	1	1606	TRUE
GH43_29_GH43_29	GH43_29	GH43_29	14	20816	TRUE
GH43_29_GH43_29	GH43_29	GH43_29	2	4987	TRUE
GH43_29_GH43_29	GH43_29	GH43_29	3	6479	TRUE
GH43_29_GH43_29	GH43_29	GH43_29	377	447799	TRUE
GH45_GH45	GH45	GH45	47	48748	TRUE
GH5_GH5	GH5	GH5	2	3420	TRUE
GH51_GH51	GH51	GH51	1	2032	TRUE
GH51_GH51	GH51	GH51	1	711	TRUE
GH51_GH51	GH51	GH51	11	19546	TRUE
GH51_GH51	GH51	GH51	12	18034	TRUE
GH51_GH51	GH51	GH51	17	21347	TRUE
GH51_GH51	GH51	GH51	2	2033	TRUE
GH51_GH51	GH51	GH51	7	14769	TRUE
GH53_GH53	GH53	GH53	1	1292	TRUE
GH53_GH53	GH53	GH53	1	833	TRUE
GH53_GH53	GH53	GH53	10	6874	TRUE
GH53_GH53	GH53	GH53	11	7707	TRUE
GH53_GH53	GH53	GH53	3	3174	TRUE
GH53_GH53	GH53	GH53	99	120529	TRUE
GH57_GH57	GH57	GH57	1	688	TRUE
GH5_4_GH5_4	GH5_4	GH5_4	1	1521	TRUE
GH5_4_GH5_4	GH5_4	GH5_4	1	1539	TRUE
GH5_4_GH5_4	GH5_4	GH5_4	142	178918	TRUE
GH5_7_GH5_7	GH5_7	GH5_7	1	500	TRUE
GH65_GH65	GH65	GH65	1	2098	TRUE
GH65_GH65	GH65	GH65	1	2188	TRUE
GH65_GH65	GH65	GH65	1	2240	TRUE
GH65_GH65	GH65	GH65	1	2251	TRUE
GH73_GH73	GH73	GH73	1	1130	TRUE
GH73_GH73	GH73	GH73	1	1185	TRUE
GH76_GH76	GH76	GH76	1	371	TRUE
GH76_GH76	GH76	GH76	12	27493	TRUE
GH76_GH76	GH76	GH76	7	16665	TRUE
GH77_GH77	GH77	GH77	1	1315	TRUE
GH78_GH78	GH78	GH78	1	2259	TRUE
GH78_GH78	GH78	GH78	1	2576	TRUE
GH78_GH78	GH78	GH78	1	481	TRUE
GH78_GH78	GH78	GH78	10	16717	TRUE
GH78_GH78	GH78	GH78	10	19990	TRUE
GH78_GH78	GH78	GH78	16	31652	TRUE
GH78_GH78	GH78	GH78	17	28719	TRUE
GH78_GH78	GH78	GH78	19	33960	TRUE
GH78_GH78	GH78	GH78	2	5241	TRUE
GH78_GH78	GH78	GH78	22	46413	TRUE
GH78_GH78	GH78	GH78	25	45793	TRUE
GH78_GH78	GH78	GH78	26	45863	TRUE
GH78_GH78	GH78	GH78	26	48369	TRUE
GH78_GH78	GH78	GH78	9	14141	TRUE
GH8_GH8	GH8	GH8	12	20663	TRUE
GH89_GH89	GH89	GH89	1	845	TRUE
GH9_GH9	GH9	GH9	1	1371	TRUE
GH9_GH9	GH9	GH9	1	2170	TRUE
GH9_GH9	GH9	GH9	1	2530	TRUE
GH9_GH9	GH9	GH9	3	4791	TRUE
GH9_GH9	GH9	GH9	51	52593	TRUE
GH92_GH92	GH92	GH92	1	1100	TRUE
GH92_GH92	GH92	GH92	1	1627	TRUE
GH92_GH92	GH92	GH92	1	1750	TRUE
GH92_GH92	GH92	GH92	1	2238	TRUE
GH92_GH92	GH92	GH92	1	2244	TRUE
GH92_GH92	GH92	GH92	1	2291	TRUE
GH92_GH92	GH92	GH92	1	2312	TRUE
GH92_GH92	GH92	GH92	1	2383	TRUE
GH92_GH92	GH92	GH92	1	2384	TRUE
GH92_GH92	GH92	GH92	1	2719	TRUE
GH92_GH92	GH92	GH92	10	17909	TRUE
GH92_GH92	GH92	GH92	13	18672	TRUE
GH92_GH92	GH92	GH92	13	26792	TRUE
GH92_GH92	GH92	GH92	14	24439	TRUE
GH92_GH92	GH92	GH92	15	25238	TRUE
GH92_GH92	GH92	GH92	2	2572	TRUE
GH92_GH92	GH92	GH92	2	3883	TRUE
GH92_GH92	GH92	GH92	2	4062	TRUE
GH92_GH92	GH92	GH92	2	4448	TRUE
GH92_GH92	GH92	GH92	3	4120	TRUE
GH92_GH92	GH92	GH92	3	4482	TRUE
GH92_GH92	GH92	GH92	33	45955	TRUE
GH92_GH92	GH92	GH92	34	47582	TRUE
GH92_GH92	GH92	GH92	5	7329	TRUE
GH92_GH92	GH92	GH92	5	7477	TRUE
GH92_GH92	GH92	GH92	5	8970	TRUE
GH92_GH92	GH92	GH92	7	12853	TRUE
GH94_GH94	GH94	GH94	29	39475	TRUE
GH94_GH94	GH94	GH94	5	9421	TRUE
GH95_GH95	GH95	GH95	1	2419	TRUE
GH95_GH95	GH95	GH95	1	902	TRUE
GH95_GH95	GH95	GH95	8	11658	TRUE
GH97_GH97	GH97	GH97	1	1544	TRUE
GH97_GH97	GH97	GH97	1	1955	TRUE
GH97_GH97	GH97	GH97	1	1955	TRUE
GH97_GH97	GH97	GH97	1	1955	TRUE
GH97_GH97	GH97	GH97	1	2165	TRUE
GH97_GH97	GH97	GH97	1	2435	TRUE
GH97_GH97	GH97	GH97	1	3096	TRUE
GH97_GH97	GH97	GH97	1	749	TRUE
GH97_GH97	GH97	GH97	10	22825	TRUE
GH97_GH97	GH97	GH97	12	29146	TRUE
GH97_GH97	GH97	GH97	13	20383	TRUE
GH97_GH97	GH97	GH97	16	25881	TRUE
GH97_GH97	GH97	GH97	16	27986	TRUE
GH97_GH97	GH97	GH97	18	20143	TRUE
GH97_GH97	GH97	GH97	23	25581	TRUE
GH97_GH97	GH97	GH97	23	27676	TRUE
GH97_GH97	GH97	GH97	28	31043	TRUE
GH97_GH97	GH97	GH97	41	47798	TRUE
GH97_GH97	GH97	GH97	5	5292	TRUE
GH97_GH97	GH97	GH97	6	10248	TRUE
GH97_GH97	GH97	GH97	85	109974	TRUE
GT1_GT1	GT1	GT1	2	4268	TRUE
GT111_GT111	GT111	GT111	1	1298	TRUE
GT14_GT14	GT14	GT14	1	851	TRUE
GT14_GT14	GT14	GT14	3	2892	TRUE
GT14_GT14	GT14	GT14	6	4795	TRUE
GT17_GT17	GT17	GT17	3	2649	TRUE
GT19_GT19	GT19	GT19	3	3675	TRUE
GT26_GT26	GT26	GT26	4	3453	TRUE
GT28_GT28	GT28	GT28	17	15801	TRUE
GT28_GT28	GT28	GT28	67	58144	TRUE
GT2_Glyco_tranf_2_3_GT2_Glyco_tranf_2_3	GT2_Glyco_tranf_2_3	GT2_Glyco_tranf_2_3	1	1169	TRUE
GT2_Glyco_tranf_2_3_GT2_Glyco_tranf_2_3	GT2_Glyco_tranf_2_3	GT2_Glyco_tranf_2_3	1	1172	TRUE
GT2_Glyco_tranf_2_3_GT2_Glyco_tranf_2_3	GT2_Glyco_tranf_2_3	GT2_Glyco_tranf_2_3	1	1181	TRUE
GT2_Glyco_tranf_2_3_GT2_Glyco_tranf_2_3	GT2_Glyco_tranf_2_3	GT2_Glyco_tranf_2_3	1	1205	TRUE
GT2_Glyco_tranf_2_3_GT2_Glyco_tranf_2_3	GT2_Glyco_tranf_2_3	GT2_Glyco_tranf_2_3	1	1212	TRUE
GT2_Glyco_tranf_2_3_GT2_Glyco_tranf_2_3	GT2_Glyco_tranf_2_3	GT2_Glyco_tranf_2_3	1	1212	TRUE
GT2_Glyco_tranf_2_3_GT2_Glyco_tranf_2_3	GT2_Glyco_tranf_2_3	GT2_Glyco_tranf_2_3	1	1212	TRUE
GT2_Glyco_tranf_2_3_GT2_Glyco_tranf_2_3	GT2_Glyco_tranf_2_3	GT2_Glyco_tranf_2_3	1	1225	TRUE
GT2_Glyco_tranf_2_3_GT2_Glyco_tranf_2_3	GT2_Glyco_tranf_2_3	GT2_Glyco_tranf_2_3	1	1229	TRUE
GT2_Glyco_tranf_2_3_GT2_Glyco_tranf_2_3	GT2_Glyco_tranf_2_3	GT2_Glyco_tranf_2_3	1	1239	TRUE
GT2_Glyco_tranf_2_3_GT2_Glyco_tranf_2_3	GT2_Glyco_tranf_2_3	GT2_Glyco_tranf_2_3	1	1245	TRUE
GT2_Glyco_tranf_2_3_GT2_Glyco_tranf_2_3	GT2_Glyco_tranf_2_3	GT2_Glyco_tranf_2_3	1	1250	TRUE
GT2_Glyco_tranf_2_3_GT2_Glyco_tranf_2_3	GT2_Glyco_tranf_2_3	GT2_Glyco_tranf_2_3	33	42700	TRUE
GT2_Glyco_tranf_2_3_GT2_Glyco_tranf_2_3	GT2_Glyco_tranf_2_3	GT2_Glyco_tranf_2_3	34	43950	TRUE
GT2_Glyco_tranf_2_3_GT2_Glyco_tranf_2_3	GT2_Glyco_tranf_2_3	GT2_Glyco_tranf_2_3	6	8828	TRUE
GT2_Glyco_tranf_2_4_GT2_Glyco_tranf_2_4	GT2_Glyco_tranf_2_4	GT2_Glyco_tranf_2_4	9	8142	TRUE
GT2_Glyco_tranf_2_5_GT2_Glyco_tranf_2_5	GT2_Glyco_tranf_2_5	GT2_Glyco_tranf_2_5	1	1682	TRUE
GT2_Glyco_tranf_2_5_GT2_Glyco_tranf_2_5	GT2_Glyco_tranf_2_5	GT2_Glyco_tranf_2_5	2	2438	TRUE
GT2_Glyco_tranf_2_5_GT2_Glyco_tranf_2_5	GT2_Glyco_tranf_2_5	GT2_Glyco_tranf_2_5	55	49864	TRUE
GT2_Glycos_transf_2_GT2_Glycos_transf_2	GT2_Glycos_transf_2	GT2_Glycos_transf_2	1	1001	TRUE
GT2_Glycos_transf_2_GT2_Glycos_transf_2	GT2_Glycos_transf_2	GT2_Glycos_transf_2	1	1001	TRUE
GT2_Glycos_transf_2_GT2_Glycos_transf_2	GT2_Glycos_transf_2	GT2_Glycos_transf_2	1	1002	TRUE
GT2_Glycos_transf_2_GT2_Glycos_transf_2	GT2_Glycos_transf_2	GT2_Glycos_transf_2	1	1003	TRUE
GT2_Glycos_transf_2_GT2_Glycos_transf_2	GT2_Glycos_transf_2	GT2_Glycos_transf_2	1	1004	TRUE
GT2_Glycos_transf_2_GT2_Glycos_transf_2	GT2_Glycos_transf_2	GT2_Glycos_transf_2	1	1004	TRUE
GT2_Glycos_transf_2_GT2_Glycos_transf_2	GT2_Glycos_transf_2	GT2_Glycos_transf_2	1	1004	TRUE
GT2_Glycos_transf_2_GT2_Glycos_transf_2	GT2_Glycos_transf_2	GT2_Glycos_transf_2	1	1004	TRUE
GT2_Glycos_transf_2_GT2_Glycos_transf_2	GT2_Glycos_transf_2	GT2_Glycos_transf_2	1	1009	TRUE
GT2_Glycos_transf_2_GT2_Glycos_transf_2	GT2_Glycos_transf_2	GT2_Glycos_transf_2	1	1011	TRUE
GT2_Glycos_transf_2_GT2_Glycos_transf_2	GT2_Glycos_transf_2	GT2_Glycos_transf_2	1	1015	TRUE
GT2_Glycos_transf_2_GT2_Glycos_transf_2	GT2_Glycos_transf_2	GT2_Glycos_transf_2	1	1016	TRUE
GT2_Glycos_transf_2_GT2_Glycos_transf_2	GT2_Glycos_transf_2	GT2_Glycos_transf_2	1	1017	TRUE
GT2_Glycos_transf_2_GT2_Glycos_transf_2	GT2_Glycos_transf_2	GT2_Glycos_transf_2	1	1022	TRUE
GT2_Glycos_transf_2_GT2_Glycos_transf_2	GT2_Glycos_transf_2	GT2_Glycos_transf_2	1	1022	TRUE
GT2_Glycos_transf_2_GT2_Glycos_transf_2	GT2_Glycos_transf_2	GT2_Glycos_transf_2	1	1025	TRUE
GT2_Glycos_transf_2_GT2_Glycos_transf_2	GT2_Glycos_transf_2	GT2_Glycos_transf_2	1	1027	TRUE
GT2_Glycos_transf_2_GT2_Glycos_transf_2	GT2_Glycos_transf_2	GT2_Glycos_transf_2	1	1032	TRUE
GT2_Glycos_transf_2_GT2_Glycos_transf_2	GT2_Glycos_transf_2	GT2_Glycos_transf_2	1	1041	TRUE
GT2_Glycos_transf_2_GT2_Glycos_transf_2	GT2_Glycos_transf_2	GT2_Glycos_transf_2	1	1046	TRUE
GT2_Glycos_transf_2_GT2_Glycos_transf_2	GT2_Glycos_transf_2	GT2_Glycos_transf_2	1	1051	TRUE
GT2_Glycos_transf_2_GT2_Glycos_transf_2	GT2_Glycos_transf_2	GT2_Glycos_transf_2	1	1051	TRUE
GT2_Glycos_transf_2_GT2_Glycos_transf_2	GT2_Glycos_transf_2	GT2_Glycos_transf_2	1	1051	TRUE
GT2_Glycos_transf_2_GT2_Glycos_transf_2	GT2_Glycos_transf_2	GT2_Glycos_transf_2	1	1051	TRUE
GT2_Glycos_transf_2_GT2_Glycos_transf_2	GT2_Glycos_transf_2	GT2_Glycos_transf_2	1	1052	TRUE
GT2_Glycos_transf_2_GT2_Glycos_transf_2	GT2_Glycos_transf_2	GT2_Glycos_transf_2	1	1052	TRUE
GT2_Glycos_transf_2_GT2_Glycos_transf_2	GT2_Glycos_transf_2	GT2_Glycos_transf_2	1	1054	TRUE
GT2_Glycos_transf_2_GT2_Glycos_transf_2	GT2_Glycos_transf_2	GT2_Glycos_transf_2	1	1057	TRUE
GT2_Glycos_transf_2_GT2_Glycos_transf_2	GT2_Glycos_transf_2	GT2_Glycos_transf_2	1	1059	TRUE
GT2_Glycos_transf_2_GT2_Glycos_transf_2	GT2_Glycos_transf_2	GT2_Glycos_transf_2	1	1060	TRUE
GT2_Glycos_transf_2_GT2_Glycos_transf_2	GT2_Glycos_transf_2	GT2_Glycos_transf_2	1	1060	TRUE
GT2_Glycos_transf_2_GT2_Glycos_transf_2	GT2_Glycos_transf_2	GT2_Glycos_transf_2	1	1061	TRUE
GT2_Glycos_transf_2_GT2_Glycos_transf_2	GT2_Glycos_transf_2	GT2_Glycos_transf_2	1	1062	TRUE
GT2_Glycos_transf_2_GT2_Glycos_transf_2	GT2_Glycos_transf_2	GT2_Glycos_transf_2	1	1069	TRUE
GT2_Glycos_transf_2_GT2_Glycos_transf_2	GT2_Glycos_transf_2	GT2_Glycos_transf_2	1	1070	TRUE
GT2_Glycos_transf_2_GT2_Glycos_transf_2	GT2_Glycos_transf_2	GT2_Glycos_transf_2	1	1071	TRUE
GT2_Glycos_transf_2_GT2_Glycos_transf_2	GT2_Glycos_transf_2	GT2_Glycos_transf_2	1	1071	TRUE
GT2_Glycos_transf_2_GT2_Glycos_transf_2	GT2_Glycos_transf_2	GT2_Glycos_transf_2	1	1071	TRUE
GT2_Glycos_transf_2_GT2_Glycos_transf_2	GT2_Glycos_transf_2	GT2_Glycos_transf_2	1	1075	TRUE
GT2_Glycos_transf_2_GT2_Glycos_transf_2	GT2_Glycos_transf_2	GT2_Glycos_transf_2	1	1075	TRUE
GT2_Glycos_transf_2_GT2_Glycos_transf_2	GT2_Glycos_transf_2	GT2_Glycos_transf_2	1	1075	TRUE
GT2_Glycos_transf_2_GT2_Glycos_transf_2	GT2_Glycos_transf_2	GT2_Glycos_transf_2	1	1079	TRUE
GT2_Glycos_transf_2_GT2_Glycos_transf_2	GT2_Glycos_transf_2	GT2_Glycos_transf_2	1	1082	TRUE
GT2_Glycos_transf_2_GT2_Glycos_transf_2	GT2_Glycos_transf_2	GT2_Glycos_transf_2	1	1086	TRUE
GT2_Glycos_transf_2_GT2_Glycos_transf_2	GT2_Glycos_transf_2	GT2_Glycos_transf_2	1	1087	TRUE
GT2_Glycos_transf_2_GT2_Glycos_transf_2	GT2_Glycos_transf_2	GT2_Glycos_transf_2	1	1088	TRUE
GT2_Glycos_transf_2_GT2_Glycos_transf_2	GT2_Glycos_transf_2	GT2_Glycos_transf_2	1	1090	TRUE
GT2_Glycos_transf_2_GT2_Glycos_transf_2	GT2_Glycos_transf_2	GT2_Glycos_transf_2	1	1093	TRUE
GT2_Glycos_transf_2_GT2_Glycos_transf_2	GT2_Glycos_transf_2	GT2_Glycos_transf_2	1	1098	TRUE
GT2_Glycos_transf_2_GT2_Glycos_transf_2	GT2_Glycos_transf_2	GT2_Glycos_transf_2	1	1102	TRUE
GT2_Glycos_transf_2_GT2_Glycos_transf_2	GT2_Glycos_transf_2	GT2_Glycos_transf_2	1	1103	TRUE
GT2_Glycos_transf_2_GT2_Glycos_transf_2	GT2_Glycos_transf_2	GT2_Glycos_transf_2	1	1103	TRUE
GT2_Glycos_transf_2_GT2_Glycos_transf_2	GT2_Glycos_transf_2	GT2_Glycos_transf_2	1	1104	TRUE
GT2_Glycos_transf_2_GT2_Glycos_transf_2	GT2_Glycos_transf_2	GT2_Glycos_transf_2	1	1122	TRUE
GT2_Glycos_transf_2_GT2_Glycos_transf_2	GT2_Glycos_transf_2	GT2_Glycos_transf_2	1	1124	TRUE
GT2_Glycos_transf_2_GT2_Glycos_transf_2	GT2_Glycos_transf_2	GT2_Glycos_transf_2	1	1124	TRUE
GT2_Glycos_transf_2_GT2_Glycos_transf_2	GT2_Glycos_transf_2	GT2_Glycos_transf_2	1	1127	TRUE
GT2_Glycos_transf_2_GT2_Glycos_transf_2	GT2_Glycos_transf_2	GT2_Glycos_transf_2	1	1132	TRUE
GT2_Glycos_transf_2_GT2_Glycos_transf_2	GT2_Glycos_transf_2	GT2_Glycos_transf_2	1	1134	TRUE
GT2_Glycos_transf_2_GT2_Glycos_transf_2	GT2_Glycos_transf_2	GT2_Glycos_transf_2	1	1135	TRUE
GT2_Glycos_transf_2_GT2_Glycos_transf_2	GT2_Glycos_transf_2	GT2_Glycos_transf_2	1	1135	TRUE
GT2_Glycos_transf_2_GT2_Glycos_transf_2	GT2_Glycos_transf_2	GT2_Glycos_transf_2	1	1135	TRUE
GT2_Glycos_transf_2_GT2_Glycos_transf_2	GT2_Glycos_transf_2	GT2_Glycos_transf_2	1	1138	TRUE
GT2_Glycos_transf_2_GT2_Glycos_transf_2	GT2_Glycos_transf_2	GT2_Glycos_transf_2	1	1140	TRUE
GT2_Glycos_transf_2_GT2_Glycos_transf_2	GT2_Glycos_transf_2	GT2_Glycos_transf_2	1	1141	TRUE
GT2_Glycos_transf_2_GT2_Glycos_transf_2	GT2_Glycos_transf_2	GT2_Glycos_transf_2	1	1142	TRUE
GT2_Glycos_transf_2_GT2_Glycos_transf_2	GT2_Glycos_transf_2	GT2_Glycos_transf_2	1	1144	TRUE
GT2_Glycos_transf_2_GT2_Glycos_transf_2	GT2_Glycos_transf_2	GT2_Glycos_transf_2	1	1146	TRUE
GT2_Glycos_transf_2_GT2_Glycos_transf_2	GT2_Glycos_transf_2	GT2_Glycos_transf_2	1	1148	TRUE
GT2_Glycos_transf_2_GT2_Glycos_transf_2	GT2_Glycos_transf_2	GT2_Glycos_transf_2	1	1151	TRUE
GT2_Glycos_transf_2_GT2_Glycos_transf_2	GT2_Glycos_transf_2	GT2_Glycos_transf_2	1	1158	TRUE
GT2_Glycos_transf_2_GT2_Glycos_transf_2	GT2_Glycos_transf_2	GT2_Glycos_transf_2	1	1159	TRUE
GT2_Glycos_transf_2_GT2_Glycos_transf_2	GT2_Glycos_transf_2	GT2_Glycos_transf_2	1	1165	TRUE
GT2_Glycos_transf_2_GT2_Glycos_transf_2	GT2_Glycos_transf_2	GT2_Glycos_transf_2	1	1185	TRUE
GT2_Glycos_transf_2_GT2_Glycos_transf_2	GT2_Glycos_transf_2	GT2_Glycos_transf_2	1	1201	TRUE
GT2_Glycos_transf_2_GT2_Glycos_transf_2	GT2_Glycos_transf_2	GT2_Glycos_transf_2	1	1203	TRUE
GT2_Glycos_transf_2_GT2_Glycos_transf_2	GT2_Glycos_transf_2	GT2_Glycos_transf_2	1	1218	TRUE
GT2_Glycos_transf_2_GT2_Glycos_transf_2	GT2_Glycos_transf_2	GT2_Glycos_transf_2	1	1219	TRUE
GT2_Glycos_transf_2_GT2_Glycos_transf_2	GT2_Glycos_transf_2	GT2_Glycos_transf_2	1	1221	TRUE
GT2_Glycos_transf_2_GT2_Glycos_transf_2	GT2_Glycos_transf_2	GT2_Glycos_transf_2	1	1223	TRUE
GT2_Glycos_transf_2_GT2_Glycos_transf_2	GT2_Glycos_transf_2	GT2_Glycos_transf_2	1	1237	TRUE
GT2_Glycos_transf_2_GT2_Glycos_transf_2	GT2_Glycos_transf_2	GT2_Glycos_transf_2	1	1242	TRUE
GT2_Glycos_transf_2_GT2_Glycos_transf_2	GT2_Glycos_transf_2	GT2_Glycos_transf_2	1	1243	TRUE
GT2_Glycos_transf_2_GT2_Glycos_transf_2	GT2_Glycos_transf_2	GT2_Glycos_transf_2	1	1249	TRUE
GT2_Glycos_transf_2_GT2_Glycos_transf_2	GT2_Glycos_transf_2	GT2_Glycos_transf_2	1	1272	TRUE
GT2_Glycos_transf_2_GT2_Glycos_transf_2	GT2_Glycos_transf_2	GT2_Glycos_transf_2	1	1283	TRUE
GT2_Glycos_transf_2_GT2_Glycos_transf_2	GT2_Glycos_transf_2	GT2_Glycos_transf_2	1	1290	TRUE
GT2_Glycos_transf_2_GT2_Glycos_transf_2	GT2_Glycos_transf_2	GT2_Glycos_transf_2	1	1322	TRUE
GT2_Glycos_transf_2_GT2_Glycos_transf_2	GT2_Glycos_transf_2	GT2_Glycos_transf_2	1	1322	TRUE
GT2_Glycos_transf_2_GT2_Glycos_transf_2	GT2_Glycos_transf_2	GT2_Glycos_transf_2	1	1322	TRUE
GT2_Glycos_transf_2_GT2_Glycos_transf_2	GT2_Glycos_transf_2	GT2_Glycos_transf_2	1	1339	TRUE
GT2_Glycos_transf_2_GT2_Glycos_transf_2	GT2_Glycos_transf_2	GT2_Glycos_transf_2	1	1340	TRUE
GT2_Glycos_transf_2_GT2_Glycos_transf_2	GT2_Glycos_transf_2	GT2_Glycos_transf_2	1	1348	TRUE
GT2_Glycos_transf_2_GT2_Glycos_transf_2	GT2_Glycos_transf_2	GT2_Glycos_transf_2	1	1362	TRUE
GT2_Glycos_transf_2_GT2_Glycos_transf_2	GT2_Glycos_transf_2	GT2_Glycos_transf_2	1	1378	TRUE
GT2_Glycos_transf_2_GT2_Glycos_transf_2	GT2_Glycos_transf_2	GT2_Glycos_transf_2	1	1381	TRUE
GT2_Glycos_transf_2_GT2_Glycos_transf_2	GT2_Glycos_transf_2	GT2_Glycos_transf_2	1	1383	TRUE
GT2_Glycos_transf_2_GT2_Glycos_transf_2	GT2_Glycos_transf_2	GT2_Glycos_transf_2	1	1383	TRUE
GT2_Glycos_transf_2_GT2_Glycos_transf_2	GT2_Glycos_transf_2	GT2_Glycos_transf_2	1	1385	TRUE
GT2_Glycos_transf_2_GT2_Glycos_transf_2	GT2_Glycos_transf_2	GT2_Glycos_transf_2	1	1396	TRUE
GT2_Glycos_transf_2_GT2_Glycos_transf_2	GT2_Glycos_transf_2	GT2_Glycos_transf_2	1	1396	TRUE
GT2_Glycos_transf_2_GT2_Glycos_transf_2	GT2_Glycos_transf_2	GT2_Glycos_transf_2	1	1402	TRUE
GT2_Glycos_transf_2_GT2_Glycos_transf_2	GT2_Glycos_transf_2	GT2_Glycos_transf_2	1	1412	TRUE
GT2_Glycos_transf_2_GT2_Glycos_transf_2	GT2_Glycos_transf_2	GT2_Glycos_transf_2	1	1423	TRUE
GT2_Glycos_transf_2_GT2_Glycos_transf_2	GT2_Glycos_transf_2	GT2_Glycos_transf_2	1	1425	TRUE
GT2_Glycos_transf_2_GT2_Glycos_transf_2	GT2_Glycos_transf_2	GT2_Glycos_transf_2	1	1442	TRUE
GT2_Glycos_transf_2_GT2_Glycos_transf_2	GT2_Glycos_transf_2	GT2_Glycos_transf_2	1	1446	TRUE
GT2_Glycos_transf_2_GT2_Glycos_transf_2	GT2_Glycos_transf_2	GT2_Glycos_transf_2	1	1463	TRUE
GT2_Glycos_transf_2_GT2_Glycos_transf_2	GT2_Glycos_transf_2	GT2_Glycos_transf_2	1	1466	TRUE
GT2_Glycos_transf_2_GT2_Glycos_transf_2	GT2_Glycos_transf_2	GT2_Glycos_transf_2	1	1477	TRUE
GT2_Glycos_transf_2_GT2_Glycos_transf_2	GT2_Glycos_transf_2	GT2_Glycos_transf_2	1	1480	TRUE
GT2_Glycos_transf_2_GT2_Glycos_transf_2	GT2_Glycos_transf_2	GT2_Glycos_transf_2	1	1495	TRUE
GT2_Glycos_transf_2_GT2_Glycos_transf_2	GT2_Glycos_transf_2	GT2_Glycos_transf_2	1	1504	TRUE
GT2_Glycos_transf_2_GT2_Glycos_transf_2	GT2_Glycos_transf_2	GT2_Glycos_transf_2	1	1518	TRUE
GT2_Glycos_transf_2_GT2_Glycos_transf_2	GT2_Glycos_transf_2	GT2_Glycos_transf_2	1	1538	TRUE
GT2_Glycos_transf_2_GT2_Glycos_transf_2	GT2_Glycos_transf_2	GT2_Glycos_transf_2	1	1543	TRUE
GT2_Glycos_transf_2_GT2_Glycos_transf_2	GT2_Glycos_transf_2	GT2_Glycos_transf_2	1	1543	TRUE
GT2_Glycos_transf_2_GT2_Glycos_transf_2	GT2_Glycos_transf_2	GT2_Glycos_transf_2	1	1620	TRUE
GT2_Glycos_transf_2_GT2_Glycos_transf_2	GT2_Glycos_transf_2	GT2_Glycos_transf_2	1	1691	TRUE
GT2_Glycos_transf_2_GT2_Glycos_transf_2	GT2_Glycos_transf_2	GT2_Glycos_transf_2	1	1766	TRUE
GT2_Glycos_transf_2_GT2_Glycos_transf_2	GT2_Glycos_transf_2	GT2_Glycos_transf_2	1	1799	TRUE
GT2_Glycos_transf_2_GT2_Glycos_transf_2	GT2_Glycos_transf_2	GT2_Glycos_transf_2	1	1805	TRUE
GT2_Glycos_transf_2_GT2_Glycos_transf_2	GT2_Glycos_transf_2	GT2_Glycos_transf_2	1	1867	TRUE
GT2_Glycos_transf_2_GT2_Glycos_transf_2	GT2_Glycos_transf_2	GT2_Glycos_transf_2	1	1901	TRUE
GT2_Glycos_transf_2_GT2_Glycos_transf_2	GT2_Glycos_transf_2	GT2_Glycos_transf_2	1	1914	TRUE
GT2_Glycos_transf_2_GT2_Glycos_transf_2	GT2_Glycos_transf_2	GT2_Glycos_transf_2	1	1942	TRUE
GT2_Glycos_transf_2_GT2_Glycos_transf_2	GT2_Glycos_transf_2	GT2_Glycos_transf_2	1	1945	TRUE
GT2_Glycos_transf_2_GT2_Glycos_transf_2	GT2_Glycos_transf_2	GT2_Glycos_transf_2	1	1993	TRUE
GT2_Glycos_transf_2_GT2_Glycos_transf_2	GT2_Glycos_transf_2	GT2_Glycos_transf_2	1	2042	TRUE
GT2_Glycos_transf_2_GT2_Glycos_transf_2	GT2_Glycos_transf_2	GT2_Glycos_transf_2	1	2092	TRUE
GT2_Glycos_transf_2_GT2_Glycos_transf_2	GT2_Glycos_transf_2	GT2_Glycos_transf_2	1	2092	TRUE
GT2_Glycos_transf_2_GT2_Glycos_transf_2	GT2_Glycos_transf_2	GT2_Glycos_transf_2	1	2092	TRUE
GT2_Glycos_transf_2_GT2_Glycos_transf_2	GT2_Glycos_transf_2	GT2_Glycos_transf_2	1	2098	TRUE
GT2_Glycos_transf_2_GT2_Glycos_transf_2	GT2_Glycos_transf_2	GT2_Glycos_transf_2	1	2108	TRUE
GT2_Glycos_transf_2_GT2_Glycos_transf_2	GT2_Glycos_transf_2	GT2_Glycos_transf_2	1	2108	TRUE
GT2_Glycos_transf_2_GT2_Glycos_transf_2	GT2_Glycos_transf_2	GT2_Glycos_transf_2	1	213	TRUE
GT2_Glycos_transf_2_GT2_Glycos_transf_2	GT2_Glycos_transf_2	GT2_Glycos_transf_2	1	2172	TRUE
GT2_Glycos_transf_2_GT2_Glycos_transf_2	GT2_Glycos_transf_2	GT2_Glycos_transf_2	1	2222	TRUE
GT2_Glycos_transf_2_GT2_Glycos_transf_2	GT2_Glycos_transf_2	GT2_Glycos_transf_2	1	2226	TRUE
GT2_Glycos_transf_2_GT2_Glycos_transf_2	GT2_Glycos_transf_2	GT2_Glycos_transf_2	1	2268	TRUE
GT2_Glycos_transf_2_GT2_Glycos_transf_2	GT2_Glycos_transf_2	GT2_Glycos_transf_2	1	2305	TRUE
GT2_Glycos_transf_2_GT2_Glycos_transf_2	GT2_Glycos_transf_2	GT2_Glycos_transf_2	1	2418	TRUE
GT2_Glycos_transf_2_GT2_Glycos_transf_2	GT2_Glycos_transf_2	GT2_Glycos_transf_2	1	257	TRUE
GT2_Glycos_transf_2_GT2_Glycos_transf_2	GT2_Glycos_transf_2	GT2_Glycos_transf_2	1	2674	TRUE
GT2_Glycos_transf_2_GT2_Glycos_transf_2	GT2_Glycos_transf_2	GT2_Glycos_transf_2	1	2682	TRUE
GT2_Glycos_transf_2_GT2_Glycos_transf_2	GT2_Glycos_transf_2	GT2_Glycos_transf_2	1	273	TRUE
GT2_Glycos_transf_2_GT2_Glycos_transf_2	GT2_Glycos_transf_2	GT2_Glycos_transf_2	1	620	TRUE
GT2_Glycos_transf_2_GT2_Glycos_transf_2	GT2_Glycos_transf_2	GT2_Glycos_transf_2	1	663	TRUE
GT2_Glycos_transf_2_GT2_Glycos_transf_2	GT2_Glycos_transf_2	GT2_Glycos_transf_2	1	705	TRUE
GT2_Glycos_transf_2_GT2_Glycos_transf_2	GT2_Glycos_transf_2	GT2_Glycos_transf_2	1	705	TRUE
GT2_Glycos_transf_2_GT2_Glycos_transf_2	GT2_Glycos_transf_2	GT2_Glycos_transf_2	1	709	TRUE
GT2_Glycos_transf_2_GT2_Glycos_transf_2	GT2_Glycos_transf_2	GT2_Glycos_transf_2	1	709	TRUE
GT2_Glycos_transf_2_GT2_Glycos_transf_2	GT2_Glycos_transf_2	GT2_Glycos_transf_2	1	711	TRUE
GT2_Glycos_transf_2_GT2_Glycos_transf_2	GT2_Glycos_transf_2	GT2_Glycos_transf_2	1	728	TRUE
GT2_Glycos_transf_2_GT2_Glycos_transf_2	GT2_Glycos_transf_2	GT2_Glycos_transf_2	1	740	TRUE
GT2_Glycos_transf_2_GT2_Glycos_transf_2	GT2_Glycos_transf_2	GT2_Glycos_transf_2	1	747	TRUE
GT2_Glycos_transf_2_GT2_Glycos_transf_2	GT2_Glycos_transf_2	GT2_Glycos_transf_2	1	750	TRUE
GT2_Glycos_transf_2_GT2_Glycos_transf_2	GT2_Glycos_transf_2	GT2_Glycos_transf_2	1	760	TRUE
GT2_Glycos_transf_2_GT2_Glycos_transf_2	GT2_Glycos_transf_2	GT2_Glycos_transf_2	1	760	TRUE
GT2_Glycos_transf_2_GT2_Glycos_transf_2	GT2_Glycos_transf_2	GT2_Glycos_transf_2	1	761	TRUE
GT2_Glycos_transf_2_GT2_Glycos_transf_2	GT2_Glycos_transf_2	GT2_Glycos_transf_2	1	763	TRUE
GT2_Glycos_transf_2_GT2_Glycos_transf_2	GT2_Glycos_transf_2	GT2_Glycos_transf_2	1	769	TRUE
GT2_Glycos_transf_2_GT2_Glycos_transf_2	GT2_Glycos_transf_2	GT2_Glycos_transf_2	1	771	TRUE
GT2_Glycos_transf_2_GT2_Glycos_transf_2	GT2_Glycos_transf_2	GT2_Glycos_transf_2	1	774	TRUE
GT2_Glycos_transf_2_GT2_Glycos_transf_2	GT2_Glycos_transf_2	GT2_Glycos_transf_2	1	775	TRUE
GT2_Glycos_transf_2_GT2_Glycos_transf_2	GT2_Glycos_transf_2	GT2_Glycos_transf_2	1	777	TRUE
GT2_Glycos_transf_2_GT2_Glycos_transf_2	GT2_Glycos_transf_2	GT2_Glycos_transf_2	1	777	TRUE
GT2_Glycos_transf_2_GT2_Glycos_transf_2	GT2_Glycos_transf_2	GT2_Glycos_transf_2	1	781	TRUE
GT2_Glycos_transf_2_GT2_Glycos_transf_2	GT2_Glycos_transf_2	GT2_Glycos_transf_2	1	782	TRUE
GT2_Glycos_transf_2_GT2_Glycos_transf_2	GT2_Glycos_transf_2	GT2_Glycos_transf_2	1	782	TRUE
GT2_Glycos_transf_2_GT2_Glycos_transf_2	GT2_Glycos_transf_2	GT2_Glycos_transf_2	1	785	TRUE
GT2_Glycos_transf_2_GT2_Glycos_transf_2	GT2_Glycos_transf_2	GT2_Glycos_transf_2	1	806	TRUE
GT2_Glycos_transf_2_GT2_Glycos_transf_2	GT2_Glycos_transf_2	GT2_Glycos_transf_2	1	808	TRUE
GT2_Glycos_transf_2_GT2_Glycos_transf_2	GT2_Glycos_transf_2	GT2_Glycos_transf_2	1	808	TRUE
GT2_Glycos_transf_2_GT2_Glycos_transf_2	GT2_Glycos_transf_2	GT2_Glycos_transf_2	1	812	TRUE
GT2_Glycos_transf_2_GT2_Glycos_transf_2	GT2_Glycos_transf_2	GT2_Glycos_transf_2	1	814	TRUE
GT2_Glycos_transf_2_GT2_Glycos_transf_2	GT2_Glycos_transf_2	GT2_Glycos_transf_2	1	815	TRUE
GT2_Glycos_transf_2_GT2_Glycos_transf_2	GT2_Glycos_transf_2	GT2_Glycos_transf_2	1	818	TRUE
GT2_Glycos_transf_2_GT2_Glycos_transf_2	GT2_Glycos_transf_2	GT2_Glycos_transf_2	1	819	TRUE
GT2_Glycos_transf_2_GT2_Glycos_transf_2	GT2_Glycos_transf_2	GT2_Glycos_transf_2	1	826	TRUE
GT2_Glycos_transf_2_GT2_Glycos_transf_2	GT2_Glycos_transf_2	GT2_Glycos_transf_2	1	827	TRUE
GT2_Glycos_transf_2_GT2_Glycos_transf_2	GT2_Glycos_transf_2	GT2_Glycos_transf_2	1	836	TRUE
GT2_Glycos_transf_2_GT2_Glycos_transf_2	GT2_Glycos_transf_2	GT2_Glycos_transf_2	1	839	TRUE
GT2_Glycos_transf_2_GT2_Glycos_transf_2	GT2_Glycos_transf_2	GT2_Glycos_transf_2	1	843	TRUE
GT2_Glycos_transf_2_GT2_Glycos_transf_2	GT2_Glycos_transf_2	GT2_Glycos_transf_2	1	845	TRUE
GT2_Glycos_transf_2_GT2_Glycos_transf_2	GT2_Glycos_transf_2	GT2_Glycos_transf_2	1	845	TRUE
GT2_Glycos_transf_2_GT2_Glycos_transf_2	GT2_Glycos_transf_2	GT2_Glycos_transf_2	1	860	TRUE
GT2_Glycos_transf_2_GT2_Glycos_transf_2	GT2_Glycos_transf_2	GT2_Glycos_transf_2	1	862	TRUE
GT2_Glycos_transf_2_GT2_Glycos_transf_2	GT2_Glycos_transf_2	GT2_Glycos_transf_2	1	869	TRUE
GT2_Glycos_transf_2_GT2_Glycos_transf_2	GT2_Glycos_transf_2	GT2_Glycos_transf_2	1	872	TRUE
GT2_Glycos_transf_2_GT2_Glycos_transf_2	GT2_Glycos_transf_2	GT2_Glycos_transf_2	1	873	TRUE
GT2_Glycos_transf_2_GT2_Glycos_transf_2	GT2_Glycos_transf_2	GT2_Glycos_transf_2	1	874	TRUE
GT2_Glycos_transf_2_GT2_Glycos_transf_2	GT2_Glycos_transf_2	GT2_Glycos_transf_2	1	874	TRUE
GT2_Glycos_transf_2_GT2_Glycos_transf_2	GT2_Glycos_transf_2	GT2_Glycos_transf_2	1	877	TRUE
GT2_Glycos_transf_2_GT2_Glycos_transf_2	GT2_Glycos_transf_2	GT2_Glycos_transf_2	1	877	TRUE
GT2_Glycos_transf_2_GT2_Glycos_transf_2	GT2_Glycos_transf_2	GT2_Glycos_transf_2	1	880	TRUE
GT2_Glycos_transf_2_GT2_Glycos_transf_2	GT2_Glycos_transf_2	GT2_Glycos_transf_2	1	883	TRUE
GT2_Glycos_transf_2_GT2_Glycos_transf_2	GT2_Glycos_transf_2	GT2_Glycos_transf_2	1	883	TRUE
GT2_Glycos_transf_2_GT2_Glycos_transf_2	GT2_Glycos_transf_2	GT2_Glycos_transf_2	1	883	TRUE
GT2_Glycos_transf_2_GT2_Glycos_transf_2	GT2_Glycos_transf_2	GT2_Glycos_transf_2	1	884	TRUE
GT2_Glycos_transf_2_GT2_Glycos_transf_2	GT2_Glycos_transf_2	GT2_Glycos_transf_2	1	890	TRUE
GT2_Glycos_transf_2_GT2_Glycos_transf_2	GT2_Glycos_transf_2	GT2_Glycos_transf_2	1	890	TRUE
GT2_Glycos_transf_2_GT2_Glycos_transf_2	GT2_Glycos_transf_2	GT2_Glycos_transf_2	1	893	TRUE
GT2_Glycos_transf_2_GT2_Glycos_transf_2	GT2_Glycos_transf_2	GT2_Glycos_transf_2	1	893	TRUE
GT2_Glycos_transf_2_GT2_Glycos_transf_2	GT2_Glycos_transf_2	GT2_Glycos_transf_2	1	895	TRUE
GT2_Glycos_transf_2_GT2_Glycos_transf_2	GT2_Glycos_transf_2	GT2_Glycos_transf_2	1	895	TRUE
GT2_Glycos_transf_2_GT2_Glycos_transf_2	GT2_Glycos_transf_2	GT2_Glycos_transf_2	1	898	TRUE
GT2_Glycos_transf_2_GT2_Glycos_transf_2	GT2_Glycos_transf_2	GT2_Glycos_transf_2	1	899	TRUE
GT2_Glycos_transf_2_GT2_Glycos_transf_2	GT2_Glycos_transf_2	GT2_Glycos_transf_2	1	900	TRUE
GT2_Glycos_transf_2_GT2_Glycos_transf_2	GT2_Glycos_transf_2	GT2_Glycos_transf_2	1	902	TRUE
GT2_Glycos_transf_2_GT2_Glycos_transf_2	GT2_Glycos_transf_2	GT2_Glycos_transf_2	1	905	TRUE
GT2_Glycos_transf_2_GT2_Glycos_transf_2	GT2_Glycos_transf_2	GT2_Glycos_transf_2	1	911	TRUE
GT2_Glycos_transf_2_GT2_Glycos_transf_2	GT2_Glycos_transf_2	GT2_Glycos_transf_2	1	913	TRUE
GT2_Glycos_transf_2_GT2_Glycos_transf_2	GT2_Glycos_transf_2	GT2_Glycos_transf_2	1	913	TRUE
GT2_Glycos_transf_2_GT2_Glycos_transf_2	GT2_Glycos_transf_2	GT2_Glycos_transf_2	1	916	TRUE
GT2_Glycos_transf_2_GT2_Glycos_transf_2	GT2_Glycos_transf_2	GT2_Glycos_transf_2	1	919	TRUE
GT2_Glycos_transf_2_GT2_Glycos_transf_2	GT2_Glycos_transf_2	GT2_Glycos_transf_2	1	921	TRUE
GT2_Glycos_transf_2_GT2_Glycos_transf_2	GT2_Glycos_transf_2	GT2_Glycos_transf_2	1	923	TRUE
GT2_Glycos_transf_2_GT2_Glycos_transf_2	GT2_Glycos_transf_2	GT2_Glycos_transf_2	1	923	TRUE
GT2_Glycos_transf_2_GT2_Glycos_transf_2	GT2_Glycos_transf_2	GT2_Glycos_transf_2	1	925	TRUE
GT2_Glycos_transf_2_GT2_Glycos_transf_2	GT2_Glycos_transf_2	GT2_Glycos_transf_2	1	925	TRUE
GT2_Glycos_transf_2_GT2_Glycos_transf_2	GT2_Glycos_transf_2	GT2_Glycos_transf_2	1	926	TRUE
GT2_Glycos_transf_2_GT2_Glycos_transf_2	GT2_Glycos_transf_2	GT2_Glycos_transf_2	1	926	TRUE
GT2_Glycos_transf_2_GT2_Glycos_transf_2	GT2_Glycos_transf_2	GT2_Glycos_transf_2	1	927	TRUE
GT2_Glycos_transf_2_GT2_Glycos_transf_2	GT2_Glycos_transf_2	GT2_Glycos_transf_2	1	929	TRUE
GT2_Glycos_transf_2_GT2_Glycos_transf_2	GT2_Glycos_transf_2	GT2_Glycos_transf_2	1	929	TRUE
GT2_Glycos_transf_2_GT2_Glycos_transf_2	GT2_Glycos_transf_2	GT2_Glycos_transf_2	1	929	TRUE
GT2_Glycos_transf_2_GT2_Glycos_transf_2	GT2_Glycos_transf_2	GT2_Glycos_transf_2	1	929	TRUE
GT2_Glycos_transf_2_GT2_Glycos_transf_2	GT2_Glycos_transf_2	GT2_Glycos_transf_2	1	930	TRUE
GT2_Glycos_transf_2_GT2_Glycos_transf_2	GT2_Glycos_transf_2	GT2_Glycos_transf_2	1	930	TRUE
GT2_Glycos_transf_2_GT2_Glycos_transf_2	GT2_Glycos_transf_2	GT2_Glycos_transf_2	1	932	TRUE
GT2_Glycos_transf_2_GT2_Glycos_transf_2	GT2_Glycos_transf_2	GT2_Glycos_transf_2	1	932	TRUE
GT2_Glycos_transf_2_GT2_Glycos_transf_2	GT2_Glycos_transf_2	GT2_Glycos_transf_2	1	938	TRUE
GT2_Glycos_transf_2_GT2_Glycos_transf_2	GT2_Glycos_transf_2	GT2_Glycos_transf_2	1	938	TRUE
GT2_Glycos_transf_2_GT2_Glycos_transf_2	GT2_Glycos_transf_2	GT2_Glycos_transf_2	1	938	TRUE
GT2_Glycos_transf_2_GT2_Glycos_transf_2	GT2_Glycos_transf_2	GT2_Glycos_transf_2	1	938	TRUE
GT2_Glycos_transf_2_GT2_Glycos_transf_2	GT2_Glycos_transf_2	GT2_Glycos_transf_2	1	939	TRUE
GT2_Glycos_transf_2_GT2_Glycos_transf_2	GT2_Glycos_transf_2	GT2_Glycos_transf_2	1	942	TRUE
GT2_Glycos_transf_2_GT2_Glycos_transf_2	GT2_Glycos_transf_2	GT2_Glycos_transf_2	1	943	TRUE
GT2_Glycos_transf_2_GT2_Glycos_transf_2	GT2_Glycos_transf_2	GT2_Glycos_transf_2	1	944	TRUE
GT2_Glycos_transf_2_GT2_Glycos_transf_2	GT2_Glycos_transf_2	GT2_Glycos_transf_2	1	944	TRUE
GT2_Glycos_transf_2_GT2_Glycos_transf_2	GT2_Glycos_transf_2	GT2_Glycos_transf_2	1	944	TRUE
GT2_Glycos_transf_2_GT2_Glycos_transf_2	GT2_Glycos_transf_2	GT2_Glycos_transf_2	1	946	TRUE
GT2_Glycos_transf_2_GT2_Glycos_transf_2	GT2_Glycos_transf_2	GT2_Glycos_transf_2	1	947	TRUE
GT2_Glycos_transf_2_GT2_Glycos_transf_2	GT2_Glycos_transf_2	GT2_Glycos_transf_2	1	947	TRUE
GT2_Glycos_transf_2_GT2_Glycos_transf_2	GT2_Glycos_transf_2	GT2_Glycos_transf_2	1	947	TRUE
GT2_Glycos_transf_2_GT2_Glycos_transf_2	GT2_Glycos_transf_2	GT2_Glycos_transf_2	1	947	TRUE
GT2_Glycos_transf_2_GT2_Glycos_transf_2	GT2_Glycos_transf_2	GT2_Glycos_transf_2	1	947	TRUE
GT2_Glycos_transf_2_GT2_Glycos_transf_2	GT2_Glycos_transf_2	GT2_Glycos_transf_2	1	949	TRUE
GT2_Glycos_transf_2_GT2_Glycos_transf_2	GT2_Glycos_transf_2	GT2_Glycos_transf_2	1	949	TRUE
GT2_Glycos_transf_2_GT2_Glycos_transf_2	GT2_Glycos_transf_2	GT2_Glycos_transf_2	1	949	TRUE
GT2_Glycos_transf_2_GT2_Glycos_transf_2	GT2_Glycos_transf_2	GT2_Glycos_transf_2	1	951	TRUE
GT2_Glycos_transf_2_GT2_Glycos_transf_2	GT2_Glycos_transf_2	GT2_Glycos_transf_2	1	953	TRUE
GT2_Glycos_transf_2_GT2_Glycos_transf_2	GT2_Glycos_transf_2	GT2_Glycos_transf_2	1	953	TRUE
GT2_Glycos_transf_2_GT2_Glycos_transf_2	GT2_Glycos_transf_2	GT2_Glycos_transf_2	1	955	TRUE
GT2_Glycos_transf_2_GT2_Glycos_transf_2	GT2_Glycos_transf_2	GT2_Glycos_transf_2	1	955	TRUE
GT2_Glycos_transf_2_GT2_Glycos_transf_2	GT2_Glycos_transf_2	GT2_Glycos_transf_2	1	957	TRUE
GT2_Glycos_transf_2_GT2_Glycos_transf_2	GT2_Glycos_transf_2	GT2_Glycos_transf_2	1	958	TRUE
GT2_Glycos_transf_2_GT2_Glycos_transf_2	GT2_Glycos_transf_2	GT2_Glycos_transf_2	1	959	TRUE
GT2_Glycos_transf_2_GT2_Glycos_transf_2	GT2_Glycos_transf_2	GT2_Glycos_transf_2	1	961	TRUE
GT2_Glycos_transf_2_GT2_Glycos_transf_2	GT2_Glycos_transf_2	GT2_Glycos_transf_2	1	961	TRUE
GT2_Glycos_transf_2_GT2_Glycos_transf_2	GT2_Glycos_transf_2	GT2_Glycos_transf_2	1	961	TRUE
GT2_Glycos_transf_2_GT2_Glycos_transf_2	GT2_Glycos_transf_2	GT2_Glycos_transf_2	1	961	TRUE
GT2_Glycos_transf_2_GT2_Glycos_transf_2	GT2_Glycos_transf_2	GT2_Glycos_transf_2	1	963	TRUE
GT2_Glycos_transf_2_GT2_Glycos_transf_2	GT2_Glycos_transf_2	GT2_Glycos_transf_2	1	964	TRUE
GT2_Glycos_transf_2_GT2_Glycos_transf_2	GT2_Glycos_transf_2	GT2_Glycos_transf_2	1	965	TRUE
GT2_Glycos_transf_2_GT2_Glycos_transf_2	GT2_Glycos_transf_2	GT2_Glycos_transf_2	1	968	TRUE
GT2_Glycos_transf_2_GT2_Glycos_transf_2	GT2_Glycos_transf_2	GT2_Glycos_transf_2	1	970	TRUE
GT2_Glycos_transf_2_GT2_Glycos_transf_2	GT2_Glycos_transf_2	GT2_Glycos_transf_2	1	970	TRUE
GT2_Glycos_transf_2_GT2_Glycos_transf_2	GT2_Glycos_transf_2	GT2_Glycos_transf_2	1	970	TRUE
GT2_Glycos_transf_2_GT2_Glycos_transf_2	GT2_Glycos_transf_2	GT2_Glycos_transf_2	1	971	TRUE
GT2_Glycos_transf_2_GT2_Glycos_transf_2	GT2_Glycos_transf_2	GT2_Glycos_transf_2	1	972	TRUE
GT2_Glycos_transf_2_GT2_Glycos_transf_2	GT2_Glycos_transf_2	GT2_Glycos_transf_2	1	972	TRUE
GT2_Glycos_transf_2_GT2_Glycos_transf_2	GT2_Glycos_transf_2	GT2_Glycos_transf_2	1	974	TRUE
GT2_Glycos_transf_2_GT2_Glycos_transf_2	GT2_Glycos_transf_2	GT2_Glycos_transf_2	1	976	TRUE
GT2_Glycos_transf_2_GT2_Glycos_transf_2	GT2_Glycos_transf_2	GT2_Glycos_transf_2	1	976	TRUE
GT2_Glycos_transf_2_GT2_Glycos_transf_2	GT2_Glycos_transf_2	GT2_Glycos_transf_2	1	980	TRUE
GT2_Glycos_transf_2_GT2_Glycos_transf_2	GT2_Glycos_transf_2	GT2_Glycos_transf_2	1	983	TRUE
GT2_Glycos_transf_2_GT2_Glycos_transf_2	GT2_Glycos_transf_2	GT2_Glycos_transf_2	1	983	TRUE
GT2_Glycos_transf_2_GT2_Glycos_transf_2	GT2_Glycos_transf_2	GT2_Glycos_transf_2	1	985	TRUE
GT2_Glycos_transf_2_GT2_Glycos_transf_2	GT2_Glycos_transf_2	GT2_Glycos_transf_2	1	987	TRUE
GT2_Glycos_transf_2_GT2_Glycos_transf_2	GT2_Glycos_transf_2	GT2_Glycos_transf_2	1	990	TRUE
GT2_Glycos_transf_2_GT2_Glycos_transf_2	GT2_Glycos_transf_2	GT2_Glycos_transf_2	1	992	TRUE
GT2_Glycos_transf_2_GT2_Glycos_transf_2	GT2_Glycos_transf_2	GT2_Glycos_transf_2	1	992	TRUE
GT2_Glycos_transf_2_GT2_Glycos_transf_2	GT2_Glycos_transf_2	GT2_Glycos_transf_2	1	993	TRUE
GT2_Glycos_transf_2_GT2_Glycos_transf_2	GT2_Glycos_transf_2	GT2_Glycos_transf_2	1	999	TRUE
GT2_Glycos_transf_2_GT2_Glycos_transf_2	GT2_Glycos_transf_2	GT2_Glycos_transf_2	10	10185	TRUE
GT2_Glycos_transf_2_GT2_Glycos_transf_2	GT2_Glycos_transf_2	GT2_Glycos_transf_2	10	10324	TRUE
GT2_Glycos_transf_2_GT2_Glycos_transf_2	GT2_Glycos_transf_2	GT2_Glycos_transf_2	10	10490	TRUE
GT2_Glycos_transf_2_GT2_Glycos_transf_2	GT2_Glycos_transf_2	GT2_Glycos_transf_2	10	10541	TRUE
GT2_Glycos_transf_2_GT2_Glycos_transf_2	GT2_Glycos_transf_2	GT2_Glycos_transf_2	10	10603	TRUE
GT2_Glycos_transf_2_GT2_Glycos_transf_2	GT2_Glycos_transf_2	GT2_Glycos_transf_2	10	10625	TRUE
GT2_Glycos_transf_2_GT2_Glycos_transf_2	GT2_Glycos_transf_2	GT2_Glycos_transf_2	10	10663	TRUE
GT2_Glycos_transf_2_GT2_Glycos_transf_2	GT2_Glycos_transf_2	GT2_Glycos_transf_2	10	10721	TRUE
GT2_Glycos_transf_2_GT2_Glycos_transf_2	GT2_Glycos_transf_2	GT2_Glycos_transf_2	10	11058	TRUE
GT2_Glycos_transf_2_GT2_Glycos_transf_2	GT2_Glycos_transf_2	GT2_Glycos_transf_2	10	11553	TRUE
GT2_Glycos_transf_2_GT2_Glycos_transf_2	GT2_Glycos_transf_2	GT2_Glycos_transf_2	10	11576	TRUE
GT2_Glycos_transf_2_GT2_Glycos_transf_2	GT2_Glycos_transf_2	GT2_Glycos_transf_2	10	12262	TRUE
GT2_Glycos_transf_2_GT2_Glycos_transf_2	GT2_Glycos_transf_2	GT2_Glycos_transf_2	10	12754	TRUE
GT2_Glycos_transf_2_GT2_Glycos_transf_2	GT2_Glycos_transf_2	GT2_Glycos_transf_2	10	13313	TRUE
GT2_Glycos_transf_2_GT2_Glycos_transf_2	GT2_Glycos_transf_2	GT2_Glycos_transf_2	10	13593	TRUE
GT2_Glycos_transf_2_GT2_Glycos_transf_2	GT2_Glycos_transf_2	GT2_Glycos_transf_2	10	13631	TRUE
GT2_Glycos_transf_2_GT2_Glycos_transf_2	GT2_Glycos_transf_2	GT2_Glycos_transf_2	10	13793	TRUE
GT2_Glycos_transf_2_GT2_Glycos_transf_2	GT2_Glycos_transf_2	GT2_Glycos_transf_2	10	14716	TRUE
GT2_Glycos_transf_2_GT2_Glycos_transf_2	GT2_Glycos_transf_2	GT2_Glycos_transf_2	10	15470	TRUE
GT2_Glycos_transf_2_GT2_Glycos_transf_2	GT2_Glycos_transf_2	GT2_Glycos_transf_2	10	16169	TRUE
GT2_Glycos_transf_2_GT2_Glycos_transf_2	GT2_Glycos_transf_2	GT2_Glycos_transf_2	10	16350	TRUE
GT2_Glycos_transf_2_GT2_Glycos_transf_2	GT2_Glycos_transf_2	GT2_Glycos_transf_2	10	16598	TRUE
GT2_Glycos_transf_2_GT2_Glycos_transf_2	GT2_Glycos_transf_2	GT2_Glycos_transf_2	10	17485	TRUE
GT2_Glycos_transf_2_GT2_Glycos_transf_2	GT2_Glycos_transf_2	GT2_Glycos_transf_2	10	18285	TRUE
GT2_Glycos_transf_2_GT2_Glycos_transf_2	GT2_Glycos_transf_2	GT2_Glycos_transf_2	10	18810	TRUE
GT2_Glycos_transf_2_GT2_Glycos_transf_2	GT2_Glycos_transf_2	GT2_Glycos_transf_2	10	18960	TRUE
GT2_Glycos_transf_2_GT2_Glycos_transf_2	GT2_Glycos_transf_2	GT2_Glycos_transf_2	10	7612	TRUE
GT2_Glycos_transf_2_GT2_Glycos_transf_2	GT2_Glycos_transf_2	GT2_Glycos_transf_2	10	8068	TRUE
GT2_Glycos_transf_2_GT2_Glycos_transf_2	GT2_Glycos_transf_2	GT2_Glycos_transf_2	10	8769	TRUE
GT2_Glycos_transf_2_GT2_Glycos_transf_2	GT2_Glycos_transf_2	GT2_Glycos_transf_2	10	8886	TRUE
GT2_Glycos_transf_2_GT2_Glycos_transf_2	GT2_Glycos_transf_2	GT2_Glycos_transf_2	10	8919	TRUE
GT2_Glycos_transf_2_GT2_Glycos_transf_2	GT2_Glycos_transf_2	GT2_Glycos_transf_2	10	9118	TRUE
GT2_Glycos_transf_2_GT2_Glycos_transf_2	GT2_Glycos_transf_2	GT2_Glycos_transf_2	10	9199	TRUE
GT2_Glycos_transf_2_GT2_Glycos_transf_2	GT2_Glycos_transf_2	GT2_Glycos_transf_2	10	9219	TRUE
GT2_Glycos_transf_2_GT2_Glycos_transf_2	GT2_Glycos_transf_2	GT2_Glycos_transf_2	10	9306	TRUE
GT2_Glycos_transf_2_GT2_Glycos_transf_2	GT2_Glycos_transf_2	GT2_Glycos_transf_2	10	9402	TRUE
GT2_Glycos_transf_2_GT2_Glycos_transf_2	GT2_Glycos_transf_2	GT2_Glycos_transf_2	10	9638	TRUE
GT2_Glycos_transf_2_GT2_Glycos_transf_2	GT2_Glycos_transf_2	GT2_Glycos_transf_2	10	9665	TRUE
GT2_Glycos_transf_2_GT2_Glycos_transf_2	GT2_Glycos_transf_2	GT2_Glycos_transf_2	10	9690	TRUE
GT2_Glycos_transf_2_GT2_Glycos_transf_2	GT2_Glycos_transf_2	GT2_Glycos_transf_2	101	112127	TRUE
GT2_Glycos_transf_2_GT2_Glycos_transf_2	GT2_Glycos_transf_2	GT2_Glycos_transf_2	101	137586	TRUE
GT2_Glycos_transf_2_GT2_Glycos_transf_2	GT2_Glycos_transf_2	GT2_Glycos_transf_2	102	102023	TRUE
GT2_Glycos_transf_2_GT2_Glycos_transf_2	GT2_Glycos_transf_2	GT2_Glycos_transf_2	102	119581	TRUE
GT2_Glycos_transf_2_GT2_Glycos_transf_2	GT2_Glycos_transf_2	GT2_Glycos_transf_2	102	138910	TRUE
GT2_Glycos_transf_2_GT2_Glycos_transf_2	GT2_Glycos_transf_2	GT2_Glycos_transf_2	103	103145	TRUE
GT2_Glycos_transf_2_GT2_Glycos_transf_2	GT2_Glycos_transf_2	GT2_Glycos_transf_2	103	120519	TRUE
GT2_Glycos_transf_2_GT2_Glycos_transf_2	GT2_Glycos_transf_2	GT2_Glycos_transf_2	106	117042	TRUE
GT2_Glycos_transf_2_GT2_Glycos_transf_2	GT2_Glycos_transf_2	GT2_Glycos_transf_2	106	117333	TRUE
GT2_Glycos_transf_2_GT2_Glycos_transf_2	GT2_Glycos_transf_2	GT2_Glycos_transf_2	11	10417	TRUE
GT2_Glycos_transf_2_GT2_Glycos_transf_2	GT2_Glycos_transf_2	GT2_Glycos_transf_2	11	11215	TRUE
GT2_Glycos_transf_2_GT2_Glycos_transf_2	GT2_Glycos_transf_2	GT2_Glycos_transf_2	11	11438	TRUE
GT2_Glycos_transf_2_GT2_Glycos_transf_2	GT2_Glycos_transf_2	GT2_Glycos_transf_2	11	11451	TRUE
GT2_Glycos_transf_2_GT2_Glycos_transf_2	GT2_Glycos_transf_2	GT2_Glycos_transf_2	11	11582	TRUE
GT2_Glycos_transf_2_GT2_Glycos_transf_2	GT2_Glycos_transf_2	GT2_Glycos_transf_2	11	11586	TRUE
GT2_Glycos_transf_2_GT2_Glycos_transf_2	GT2_Glycos_transf_2	GT2_Glycos_transf_2	11	11754	TRUE
GT2_Glycos_transf_2_GT2_Glycos_transf_2	GT2_Glycos_transf_2	GT2_Glycos_transf_2	11	12126	TRUE
GT2_Glycos_transf_2_GT2_Glycos_transf_2	GT2_Glycos_transf_2	GT2_Glycos_transf_2	11	12259	TRUE
GT2_Glycos_transf_2_GT2_Glycos_transf_2	GT2_Glycos_transf_2	GT2_Glycos_transf_2	11	12605	TRUE
GT2_Glycos_transf_2_GT2_Glycos_transf_2	GT2_Glycos_transf_2	GT2_Glycos_transf_2	11	12616	TRUE
GT2_Glycos_transf_2_GT2_Glycos_transf_2	GT2_Glycos_transf_2	GT2_Glycos_transf_2	11	13089	TRUE
GT2_Glycos_transf_2_GT2_Glycos_transf_2	GT2_Glycos_transf_2	GT2_Glycos_transf_2	11	13593	TRUE
GT2_Glycos_transf_2_GT2_Glycos_transf_2	GT2_Glycos_transf_2	GT2_Glycos_transf_2	11	13805	TRUE
GT2_Glycos_transf_2_GT2_Glycos_transf_2	GT2_Glycos_transf_2	GT2_Glycos_transf_2	11	14156	TRUE
GT2_Glycos_transf_2_GT2_Glycos_transf_2	GT2_Glycos_transf_2	GT2_Glycos_transf_2	11	15196	TRUE
GT2_Glycos_transf_2_GT2_Glycos_transf_2	GT2_Glycos_transf_2	GT2_Glycos_transf_2	11	16686	TRUE
GT2_Glycos_transf_2_GT2_Glycos_transf_2	GT2_Glycos_transf_2	GT2_Glycos_transf_2	11	18071	TRUE
GT2_Glycos_transf_2_GT2_Glycos_transf_2	GT2_Glycos_transf_2	GT2_Glycos_transf_2	11	18587	TRUE
GT2_Glycos_transf_2_GT2_Glycos_transf_2	GT2_Glycos_transf_2	GT2_Glycos_transf_2	11	18951	TRUE
GT2_Glycos_transf_2_GT2_Glycos_transf_2	GT2_Glycos_transf_2	GT2_Glycos_transf_2	11	19939	TRUE
GT2_Glycos_transf_2_GT2_Glycos_transf_2	GT2_Glycos_transf_2	GT2_Glycos_transf_2	11	20457	TRUE
GT2_Glycos_transf_2_GT2_Glycos_transf_2	GT2_Glycos_transf_2	GT2_Glycos_transf_2	11	21228	TRUE
GT2_Glycos_transf_2_GT2_Glycos_transf_2	GT2_Glycos_transf_2	GT2_Glycos_transf_2	11	7306	TRUE
GT2_Glycos_transf_2_GT2_Glycos_transf_2	GT2_Glycos_transf_2	GT2_Glycos_transf_2	11	7344	TRUE
GT2_Glycos_transf_2_GT2_Glycos_transf_2	GT2_Glycos_transf_2	GT2_Glycos_transf_2	11	7597	TRUE
GT2_Glycos_transf_2_GT2_Glycos_transf_2	GT2_Glycos_transf_2	GT2_Glycos_transf_2	11	8697	TRUE
GT2_Glycos_transf_2_GT2_Glycos_transf_2	GT2_Glycos_transf_2	GT2_Glycos_transf_2	11	9192	TRUE
GT2_Glycos_transf_2_GT2_Glycos_transf_2	GT2_Glycos_transf_2	GT2_Glycos_transf_2	11	9243	TRUE
GT2_Glycos_transf_2_GT2_Glycos_transf_2	GT2_Glycos_transf_2	GT2_Glycos_transf_2	11	9653	TRUE
GT2_Glycos_transf_2_GT2_Glycos_transf_2	GT2_Glycos_transf_2	GT2_Glycos_transf_2	11	9746	TRUE
GT2_Glycos_transf_2_GT2_Glycos_transf_2	GT2_Glycos_transf_2	GT2_Glycos_transf_2	11	9976	TRUE
GT2_Glycos_transf_2_GT2_Glycos_transf_2	GT2_Glycos_transf_2	GT2_Glycos_transf_2	111	130024	TRUE
GT2_Glycos_transf_2_GT2_Glycos_transf_2	GT2_Glycos_transf_2	GT2_Glycos_transf_2	111	150830	TRUE
GT2_Glycos_transf_2_GT2_Glycos_transf_2	GT2_Glycos_transf_2	GT2_Glycos_transf_2	114	153880	TRUE
GT2_Glycos_transf_2_GT2_Glycos_transf_2	GT2_Glycos_transf_2	GT2_Glycos_transf_2	119	110957	TRUE
GT2_Glycos_transf_2_GT2_Glycos_transf_2	GT2_Glycos_transf_2	GT2_Glycos_transf_2	12	10534	TRUE
GT2_Glycos_transf_2_GT2_Glycos_transf_2	GT2_Glycos_transf_2	GT2_Glycos_transf_2	12	10821	TRUE
GT2_Glycos_transf_2_GT2_Glycos_transf_2	GT2_Glycos_transf_2	GT2_Glycos_transf_2	12	11032	TRUE
GT2_Glycos_transf_2_GT2_Glycos_transf_2	GT2_Glycos_transf_2	GT2_Glycos_transf_2	12	11164	TRUE
GT2_Glycos_transf_2_GT2_Glycos_transf_2	GT2_Glycos_transf_2	GT2_Glycos_transf_2	12	11981	TRUE
GT2_Glycos_transf_2_GT2_Glycos_transf_2	GT2_Glycos_transf_2	GT2_Glycos_transf_2	12	12096	TRUE
GT2_Glycos_transf_2_GT2_Glycos_transf_2	GT2_Glycos_transf_2	GT2_Glycos_transf_2	12	12495	TRUE
GT2_Glycos_transf_2_GT2_Glycos_transf_2	GT2_Glycos_transf_2	GT2_Glycos_transf_2	12	12580	TRUE
GT2_Glycos_transf_2_GT2_Glycos_transf_2	GT2_Glycos_transf_2	GT2_Glycos_transf_2	12	12841	TRUE
GT2_Glycos_transf_2_GT2_Glycos_transf_2	GT2_Glycos_transf_2	GT2_Glycos_transf_2	12	12917	TRUE
GT2_Glycos_transf_2_GT2_Glycos_transf_2	GT2_Glycos_transf_2	GT2_Glycos_transf_2	12	13345	TRUE
GT2_Glycos_transf_2_GT2_Glycos_transf_2	GT2_Glycos_transf_2	GT2_Glycos_transf_2	12	13830	TRUE
GT2_Glycos_transf_2_GT2_Glycos_transf_2	GT2_Glycos_transf_2	GT2_Glycos_transf_2	12	14068	TRUE
GT2_Glycos_transf_2_GT2_Glycos_transf_2	GT2_Glycos_transf_2	GT2_Glycos_transf_2	12	14090	TRUE
GT2_Glycos_transf_2_GT2_Glycos_transf_2	GT2_Glycos_transf_2	GT2_Glycos_transf_2	12	14297	TRUE
GT2_Glycos_transf_2_GT2_Glycos_transf_2	GT2_Glycos_transf_2	GT2_Glycos_transf_2	12	14607	TRUE
GT2_Glycos_transf_2_GT2_Glycos_transf_2	GT2_Glycos_transf_2	GT2_Glycos_transf_2	12	15033	TRUE
GT2_Glycos_transf_2_GT2_Glycos_transf_2	GT2_Glycos_transf_2	GT2_Glycos_transf_2	12	15207	TRUE
GT2_Glycos_transf_2_GT2_Glycos_transf_2	GT2_Glycos_transf_2	GT2_Glycos_transf_2	12	16662	TRUE
GT2_Glycos_transf_2_GT2_Glycos_transf_2	GT2_Glycos_transf_2	GT2_Glycos_transf_2	12	17773	TRUE
GT2_Glycos_transf_2_GT2_Glycos_transf_2	GT2_Glycos_transf_2	GT2_Glycos_transf_2	12	18774	TRUE
GT2_Glycos_transf_2_GT2_Glycos_transf_2	GT2_Glycos_transf_2	GT2_Glycos_transf_2	12	19141	TRUE
GT2_Glycos_transf_2_GT2_Glycos_transf_2	GT2_Glycos_transf_2	GT2_Glycos_transf_2	12	19808	TRUE
GT2_Glycos_transf_2_GT2_Glycos_transf_2	GT2_Glycos_transf_2	GT2_Glycos_transf_2	12	20133	TRUE
GT2_Glycos_transf_2_GT2_Glycos_transf_2	GT2_Glycos_transf_2	GT2_Glycos_transf_2	12	21678	TRUE
GT2_Glycos_transf_2_GT2_Glycos_transf_2	GT2_Glycos_transf_2	GT2_Glycos_transf_2	12	22239	TRUE
GT2_Glycos_transf_2_GT2_Glycos_transf_2	GT2_Glycos_transf_2	GT2_Glycos_transf_2	12	8277	TRUE
GT2_Glycos_transf_2_GT2_Glycos_transf_2	GT2_Glycos_transf_2	GT2_Glycos_transf_2	12	8406	TRUE
GT2_Glycos_transf_2_GT2_Glycos_transf_2	GT2_Glycos_transf_2	GT2_Glycos_transf_2	12	8560	TRUE
GT2_Glycos_transf_2_GT2_Glycos_transf_2	GT2_Glycos_transf_2	GT2_Glycos_transf_2	125	138796	TRUE
GT2_Glycos_transf_2_GT2_Glycos_transf_2	GT2_Glycos_transf_2	GT2_Glycos_transf_2	13	10807	TRUE
GT2_Glycos_transf_2_GT2_Glycos_transf_2	GT2_Glycos_transf_2	GT2_Glycos_transf_2	13	11453	TRUE
GT2_Glycos_transf_2_GT2_Glycos_transf_2	GT2_Glycos_transf_2	GT2_Glycos_transf_2	13	12240	TRUE
GT2_Glycos_transf_2_GT2_Glycos_transf_2	GT2_Glycos_transf_2	GT2_Glycos_transf_2	13	12452	TRUE
GT2_Glycos_transf_2_GT2_Glycos_transf_2	GT2_Glycos_transf_2	GT2_Glycos_transf_2	13	12864	TRUE
GT2_Glycos_transf_2_GT2_Glycos_transf_2	GT2_Glycos_transf_2	GT2_Glycos_transf_2	13	13105	TRUE
GT2_Glycos_transf_2_GT2_Glycos_transf_2	GT2_Glycos_transf_2	GT2_Glycos_transf_2	13	13589	TRUE
GT2_Glycos_transf_2_GT2_Glycos_transf_2	GT2_Glycos_transf_2	GT2_Glycos_transf_2	13	13968	TRUE
GT2_Glycos_transf_2_GT2_Glycos_transf_2	GT2_Glycos_transf_2	GT2_Glycos_transf_2	13	14302	TRUE
GT2_Glycos_transf_2_GT2_Glycos_transf_2	GT2_Glycos_transf_2	GT2_Glycos_transf_2	13	14485	TRUE
GT2_Glycos_transf_2_GT2_Glycos_transf_2	GT2_Glycos_transf_2	GT2_Glycos_transf_2	13	14672	TRUE
GT2_Glycos_transf_2_GT2_Glycos_transf_2	GT2_Glycos_transf_2	GT2_Glycos_transf_2	13	14834	TRUE
GT2_Glycos_transf_2_GT2_Glycos_transf_2	GT2_Glycos_transf_2	GT2_Glycos_transf_2	13	14936	TRUE
GT2_Glycos_transf_2_GT2_Glycos_transf_2	GT2_Glycos_transf_2	GT2_Glycos_transf_2	13	15258	TRUE
GT2_Glycos_transf_2_GT2_Glycos_transf_2	GT2_Glycos_transf_2	GT2_Glycos_transf_2	13	15342	TRUE
GT2_Glycos_transf_2_GT2_Glycos_transf_2	GT2_Glycos_transf_2	GT2_Glycos_transf_2	13	15622	TRUE
GT2_Glycos_transf_2_GT2_Glycos_transf_2	GT2_Glycos_transf_2	GT2_Glycos_transf_2	13	15840	TRUE
GT2_Glycos_transf_2_GT2_Glycos_transf_2	GT2_Glycos_transf_2	GT2_Glycos_transf_2	13	16108	TRUE
GT2_Glycos_transf_2_GT2_Glycos_transf_2	GT2_Glycos_transf_2	GT2_Glycos_transf_2	13	16173	TRUE
GT2_Glycos_transf_2_GT2_Glycos_transf_2	GT2_Glycos_transf_2	GT2_Glycos_transf_2	13	17895	TRUE
GT2_Glycos_transf_2_GT2_Glycos_transf_2	GT2_Glycos_transf_2	GT2_Glycos_transf_2	13	17911	TRUE
GT2_Glycos_transf_2_GT2_Glycos_transf_2	GT2_Glycos_transf_2	GT2_Glycos_transf_2	13	19179	TRUE
GT2_Glycos_transf_2_GT2_Glycos_transf_2	GT2_Glycos_transf_2	GT2_Glycos_transf_2	13	20036	TRUE
GT2_Glycos_transf_2_GT2_Glycos_transf_2	GT2_Glycos_transf_2	GT2_Glycos_transf_2	13	21980	TRUE
GT2_Glycos_transf_2_GT2_Glycos_transf_2	GT2_Glycos_transf_2	GT2_Glycos_transf_2	13	22359	TRUE
GT2_Glycos_transf_2_GT2_Glycos_transf_2	GT2_Glycos_transf_2	GT2_Glycos_transf_2	13	23488	TRUE
GT2_Glycos_transf_2_GT2_Glycos_transf_2	GT2_Glycos_transf_2	GT2_Glycos_transf_2	13	24096	TRUE
GT2_Glycos_transf_2_GT2_Glycos_transf_2	GT2_Glycos_transf_2	GT2_Glycos_transf_2	13	24507	TRUE
GT2_Glycos_transf_2_GT2_Glycos_transf_2	GT2_Glycos_transf_2	GT2_Glycos_transf_2	13	9368	TRUE
GT2_Glycos_transf_2_GT2_Glycos_transf_2	GT2_Glycos_transf_2	GT2_Glycos_transf_2	13	9460	TRUE
GT2_Glycos_transf_2_GT2_Glycos_transf_2	GT2_Glycos_transf_2	GT2_Glycos_transf_2	13	9545	TRUE
GT2_Glycos_transf_2_GT2_Glycos_transf_2	GT2_Glycos_transf_2	GT2_Glycos_transf_2	13	9758	TRUE
GT2_Glycos_transf_2_GT2_Glycos_transf_2	GT2_Glycos_transf_2	GT2_Glycos_transf_2	135	143051	TRUE
GT2_Glycos_transf_2_GT2_Glycos_transf_2	GT2_Glycos_transf_2	GT2_Glycos_transf_2	135	162742	TRUE
GT2_Glycos_transf_2_GT2_Glycos_transf_2	GT2_Glycos_transf_2	GT2_Glycos_transf_2	135	181649	TRUE
GT2_Glycos_transf_2_GT2_Glycos_transf_2	GT2_Glycos_transf_2	GT2_Glycos_transf_2	136	182523	TRUE
GT2_Glycos_transf_2_GT2_Glycos_transf_2	GT2_Glycos_transf_2	GT2_Glycos_transf_2	137	140744	TRUE
GT2_Glycos_transf_2_GT2_Glycos_transf_2	GT2_Glycos_transf_2	GT2_Glycos_transf_2	137	201546	TRUE
GT2_Glycos_transf_2_GT2_Glycos_transf_2	GT2_Glycos_transf_2	GT2_Glycos_transf_2	14	10331	TRUE
GT2_Glycos_transf_2_GT2_Glycos_transf_2	GT2_Glycos_transf_2	GT2_Glycos_transf_2	14	10339	TRUE
GT2_Glycos_transf_2_GT2_Glycos_transf_2	GT2_Glycos_transf_2	GT2_Glycos_transf_2	14	10522	TRUE
GT2_Glycos_transf_2_GT2_Glycos_transf_2	GT2_Glycos_transf_2	GT2_Glycos_transf_2	14	11120	TRUE
GT2_Glycos_transf_2_GT2_Glycos_transf_2	GT2_Glycos_transf_2	GT2_Glycos_transf_2	14	11880	TRUE
GT2_Glycos_transf_2_GT2_Glycos_transf_2	GT2_Glycos_transf_2	GT2_Glycos_transf_2	14	12469	TRUE
GT2_Glycos_transf_2_GT2_Glycos_transf_2	GT2_Glycos_transf_2	GT2_Glycos_transf_2	14	12989	TRUE
GT2_Glycos_transf_2_GT2_Glycos_transf_2	GT2_Glycos_transf_2	GT2_Glycos_transf_2	14	13498	TRUE
GT2_Glycos_transf_2_GT2_Glycos_transf_2	GT2_Glycos_transf_2	GT2_Glycos_transf_2	14	13726	TRUE
GT2_Glycos_transf_2_GT2_Glycos_transf_2	GT2_Glycos_transf_2	GT2_Glycos_transf_2	14	13781	TRUE
GT2_Glycos_transf_2_GT2_Glycos_transf_2	GT2_Glycos_transf_2	GT2_Glycos_transf_2	14	14198	TRUE
GT2_Glycos_transf_2_GT2_Glycos_transf_2	GT2_Glycos_transf_2	GT2_Glycos_transf_2	14	14656	TRUE
GT2_Glycos_transf_2_GT2_Glycos_transf_2	GT2_Glycos_transf_2	GT2_Glycos_transf_2	14	14918	TRUE
GT2_Glycos_transf_2_GT2_Glycos_transf_2	GT2_Glycos_transf_2	GT2_Glycos_transf_2	14	14974	TRUE
GT2_Glycos_transf_2_GT2_Glycos_transf_2	GT2_Glycos_transf_2	GT2_Glycos_transf_2	14	15175	TRUE
GT2_Glycos_transf_2_GT2_Glycos_transf_2	GT2_Glycos_transf_2	GT2_Glycos_transf_2	14	15196	TRUE
GT2_Glycos_transf_2_GT2_Glycos_transf_2	GT2_Glycos_transf_2	GT2_Glycos_transf_2	14	15391	TRUE
GT2_Glycos_transf_2_GT2_Glycos_transf_2	GT2_Glycos_transf_2	GT2_Glycos_transf_2	14	15485	TRUE
GT2_Glycos_transf_2_GT2_Glycos_transf_2	GT2_Glycos_transf_2	GT2_Glycos_transf_2	14	16123	TRUE
GT2_Glycos_transf_2_GT2_Glycos_transf_2	GT2_Glycos_transf_2	GT2_Glycos_transf_2	14	16427	TRUE
GT2_Glycos_transf_2_GT2_Glycos_transf_2	GT2_Glycos_transf_2	GT2_Glycos_transf_2	14	16459	TRUE
GT2_Glycos_transf_2_GT2_Glycos_transf_2	GT2_Glycos_transf_2	GT2_Glycos_transf_2	14	16756	TRUE
GT2_Glycos_transf_2_GT2_Glycos_transf_2	GT2_Glycos_transf_2	GT2_Glycos_transf_2	14	16801	TRUE
GT2_Glycos_transf_2_GT2_Glycos_transf_2	GT2_Glycos_transf_2	GT2_Glycos_transf_2	14	17242	TRUE
GT2_Glycos_transf_2_GT2_Glycos_transf_2	GT2_Glycos_transf_2	GT2_Glycos_transf_2	14	17248	TRUE
GT2_Glycos_transf_2_GT2_Glycos_transf_2	GT2_Glycos_transf_2	GT2_Glycos_transf_2	14	17249	TRUE
GT2_Glycos_transf_2_GT2_Glycos_transf_2	GT2_Glycos_transf_2	GT2_Glycos_transf_2	14	18478	TRUE
GT2_Glycos_transf_2_GT2_Glycos_transf_2	GT2_Glycos_transf_2	GT2_Glycos_transf_2	14	19057	TRUE
GT2_Glycos_transf_2_GT2_Glycos_transf_2	GT2_Glycos_transf_2	GT2_Glycos_transf_2	14	20359	TRUE
GT2_Glycos_transf_2_GT2_Glycos_transf_2	GT2_Glycos_transf_2	GT2_Glycos_transf_2	14	22589	TRUE
GT2_Glycos_transf_2_GT2_Glycos_transf_2	GT2_Glycos_transf_2	GT2_Glycos_transf_2	14	23881	TRUE
GT2_Glycos_transf_2_GT2_Glycos_transf_2	GT2_Glycos_transf_2	GT2_Glycos_transf_2	14	24954	TRUE
GT2_Glycos_transf_2_GT2_Glycos_transf_2	GT2_Glycos_transf_2	GT2_Glycos_transf_2	14	25756	TRUE
GT2_Glycos_transf_2_GT2_Glycos_transf_2	GT2_Glycos_transf_2	GT2_Glycos_transf_2	145	166216	TRUE
GT2_Glycos_transf_2_GT2_Glycos_transf_2	GT2_Glycos_transf_2	GT2_Glycos_transf_2	15	11302	TRUE
GT2_Glycos_transf_2_GT2_Glycos_transf_2	GT2_Glycos_transf_2	GT2_Glycos_transf_2	15	11316	TRUE
GT2_Glycos_transf_2_GT2_Glycos_transf_2	GT2_Glycos_transf_2	GT2_Glycos_transf_2	15	11577	TRUE
GT2_Glycos_transf_2_GT2_Glycos_transf_2	GT2_Glycos_transf_2	GT2_Glycos_transf_2	15	11956	TRUE
GT2_Glycos_transf_2_GT2_Glycos_transf_2	GT2_Glycos_transf_2	GT2_Glycos_transf_2	15	12742	TRUE
GT2_Glycos_transf_2_GT2_Glycos_transf_2	GT2_Glycos_transf_2	GT2_Glycos_transf_2	15	13257	TRUE
GT2_Glycos_transf_2_GT2_Glycos_transf_2	GT2_Glycos_transf_2	GT2_Glycos_transf_2	15	13680	TRUE
GT2_Glycos_transf_2_GT2_Glycos_transf_2	GT2_Glycos_transf_2	GT2_Glycos_transf_2	15	14304	TRUE
GT2_Glycos_transf_2_GT2_Glycos_transf_2	GT2_Glycos_transf_2	GT2_Glycos_transf_2	15	14664	TRUE
GT2_Glycos_transf_2_GT2_Glycos_transf_2	GT2_Glycos_transf_2	GT2_Glycos_transf_2	15	14665	TRUE
GT2_Glycos_transf_2_GT2_Glycos_transf_2	GT2_Glycos_transf_2	GT2_Glycos_transf_2	15	15130	TRUE
GT2_Glycos_transf_2_GT2_Glycos_transf_2	GT2_Glycos_transf_2	GT2_Glycos_transf_2	15	15856	TRUE
GT2_Glycos_transf_2_GT2_Glycos_transf_2	GT2_Glycos_transf_2	GT2_Glycos_transf_2	15	16267	TRUE
GT2_Glycos_transf_2_GT2_Glycos_transf_2	GT2_Glycos_transf_2	GT2_Glycos_transf_2	15	16591	TRUE
GT2_Glycos_transf_2_GT2_Glycos_transf_2	GT2_Glycos_transf_2	GT2_Glycos_transf_2	15	16973	TRUE
GT2_Glycos_transf_2_GT2_Glycos_transf_2	GT2_Glycos_transf_2	GT2_Glycos_transf_2	15	17017	TRUE
GT2_Glycos_transf_2_GT2_Glycos_transf_2	GT2_Glycos_transf_2	GT2_Glycos_transf_2	15	18203	TRUE
GT2_Glycos_transf_2_GT2_Glycos_transf_2	GT2_Glycos_transf_2	GT2_Glycos_transf_2	15	18389	TRUE
GT2_Glycos_transf_2_GT2_Glycos_transf_2	GT2_Glycos_transf_2	GT2_Glycos_transf_2	15	18495	TRUE
GT2_Glycos_transf_2_GT2_Glycos_transf_2	GT2_Glycos_transf_2	GT2_Glycos_transf_2	15	20442	TRUE
GT2_Glycos_transf_2_GT2_Glycos_transf_2	GT2_Glycos_transf_2	GT2_Glycos_transf_2	15	20597	TRUE
GT2_Glycos_transf_2_GT2_Glycos_transf_2	GT2_Glycos_transf_2	GT2_Glycos_transf_2	15	21190	TRUE
GT2_Glycos_transf_2_GT2_Glycos_transf_2	GT2_Glycos_transf_2	GT2_Glycos_transf_2	15	21660	TRUE
GT2_Glycos_transf_2_GT2_Glycos_transf_2	GT2_Glycos_transf_2	GT2_Glycos_transf_2	15	22212	TRUE
GT2_Glycos_transf_2_GT2_Glycos_transf_2	GT2_Glycos_transf_2	GT2_Glycos_transf_2	15	24012	TRUE
GT2_Glycos_transf_2_GT2_Glycos_transf_2	GT2_Glycos_transf_2	GT2_Glycos_transf_2	15	24815	TRUE
GT2_Glycos_transf_2_GT2_Glycos_transf_2	GT2_Glycos_transf_2	GT2_Glycos_transf_2	15	26422	TRUE
GT2_Glycos_transf_2_GT2_Glycos_transf_2	GT2_Glycos_transf_2	GT2_Glycos_transf_2	15	27222	TRUE
GT2_Glycos_transf_2_GT2_Glycos_transf_2	GT2_Glycos_transf_2	GT2_Glycos_transf_2	15	27375	TRUE
GT2_Glycos_transf_2_GT2_Glycos_transf_2	GT2_Glycos_transf_2	GT2_Glycos_transf_2	155	189064	TRUE
GT2_Glycos_transf_2_GT2_Glycos_transf_2	GT2_Glycos_transf_2	GT2_Glycos_transf_2	16	12287	TRUE
GT2_Glycos_transf_2_GT2_Glycos_transf_2	GT2_Glycos_transf_2	GT2_Glycos_transf_2	16	12516	TRUE
GT2_Glycos_transf_2_GT2_Glycos_transf_2	GT2_Glycos_transf_2	GT2_Glycos_transf_2	16	15444	TRUE
GT2_Glycos_transf_2_GT2_Glycos_transf_2	GT2_Glycos_transf_2	GT2_Glycos_transf_2	16	15526	TRUE
GT2_Glycos_transf_2_GT2_Glycos_transf_2	GT2_Glycos_transf_2	GT2_Glycos_transf_2	16	15548	TRUE
GT2_Glycos_transf_2_GT2_Glycos_transf_2	GT2_Glycos_transf_2	GT2_Glycos_transf_2	16	15807	TRUE
GT2_Glycos_transf_2_GT2_Glycos_transf_2	GT2_Glycos_transf_2	GT2_Glycos_transf_2	16	15872	TRUE
GT2_Glycos_transf_2_GT2_Glycos_transf_2	GT2_Glycos_transf_2	GT2_Glycos_transf_2	16	16100	TRUE
GT2_Glycos_transf_2_GT2_Glycos_transf_2	GT2_Glycos_transf_2	GT2_Glycos_transf_2	16	17588	TRUE
GT2_Glycos_transf_2_GT2_Glycos_transf_2	GT2_Glycos_transf_2	GT2_Glycos_transf_2	16	18045	TRUE
GT2_Glycos_transf_2_GT2_Glycos_transf_2	GT2_Glycos_transf_2	GT2_Glycos_transf_2	16	18107	TRUE
GT2_Glycos_transf_2_GT2_Glycos_transf_2	GT2_Glycos_transf_2	GT2_Glycos_transf_2	16	19074	TRUE
GT2_Glycos_transf_2_GT2_Glycos_transf_2	GT2_Glycos_transf_2	GT2_Glycos_transf_2	16	20119	TRUE
GT2_Glycos_transf_2_GT2_Glycos_transf_2	GT2_Glycos_transf_2	GT2_Glycos_transf_2	16	20174	TRUE
GT2_Glycos_transf_2_GT2_Glycos_transf_2	GT2_Glycos_transf_2	GT2_Glycos_transf_2	16	20811	TRUE
GT2_Glycos_transf_2_GT2_Glycos_transf_2	GT2_Glycos_transf_2	GT2_Glycos_transf_2	16	21233	TRUE
GT2_Glycos_transf_2_GT2_Glycos_transf_2	GT2_Glycos_transf_2	GT2_Glycos_transf_2	16	22579	TRUE
GT2_Glycos_transf_2_GT2_Glycos_transf_2	GT2_Glycos_transf_2	GT2_Glycos_transf_2	16	23602	TRUE
GT2_Glycos_transf_2_GT2_Glycos_transf_2	GT2_Glycos_transf_2	GT2_Glycos_transf_2	16	23608	TRUE
GT2_Glycos_transf_2_GT2_Glycos_transf_2	GT2_Glycos_transf_2	GT2_Glycos_transf_2	16	25115	TRUE
GT2_Glycos_transf_2_GT2_Glycos_transf_2	GT2_Glycos_transf_2	GT2_Glycos_transf_2	16	26120	TRUE
GT2_Glycos_transf_2_GT2_Glycos_transf_2	GT2_Glycos_transf_2	GT2_Glycos_transf_2	16	26238	TRUE
GT2_Glycos_transf_2_GT2_Glycos_transf_2	GT2_Glycos_transf_2	GT2_Glycos_transf_2	16	28624	TRUE
GT2_Glycos_transf_2_GT2_Glycos_transf_2	GT2_Glycos_transf_2	GT2_Glycos_transf_2	16	28960	TRUE
GT2_Glycos_transf_2_GT2_Glycos_transf_2	GT2_Glycos_transf_2	GT2_Glycos_transf_2	162	188077	TRUE
GT2_Glycos_transf_2_GT2_Glycos_transf_2	GT2_Glycos_transf_2	GT2_Glycos_transf_2	164	190579	TRUE
GT2_Glycos_transf_2_GT2_Glycos_transf_2	GT2_Glycos_transf_2	GT2_Glycos_transf_2	165	191418	TRUE
GT2_Glycos_transf_2_GT2_Glycos_transf_2	GT2_Glycos_transf_2	GT2_Glycos_transf_2	17	15835	TRUE
GT2_Glycos_transf_2_GT2_Glycos_transf_2	GT2_Glycos_transf_2	GT2_Glycos_transf_2	17	16039	TRUE
GT2_Glycos_transf_2_GT2_Glycos_transf_2	GT2_Glycos_transf_2	GT2_Glycos_transf_2	17	16410	TRUE
GT2_Glycos_transf_2_GT2_Glycos_transf_2	GT2_Glycos_transf_2	GT2_Glycos_transf_2	17	17141	TRUE
GT2_Glycos_transf_2_GT2_Glycos_transf_2	GT2_Glycos_transf_2	GT2_Glycos_transf_2	17	17784	TRUE
GT2_Glycos_transf_2_GT2_Glycos_transf_2	GT2_Glycos_transf_2	GT2_Glycos_transf_2	17	17887	TRUE
GT2_Glycos_transf_2_GT2_Glycos_transf_2	GT2_Glycos_transf_2	GT2_Glycos_transf_2	17	18147	TRUE
GT2_Glycos_transf_2_GT2_Glycos_transf_2	GT2_Glycos_transf_2	GT2_Glycos_transf_2	17	18371	TRUE
GT2_Glycos_transf_2_GT2_Glycos_transf_2	GT2_Glycos_transf_2	GT2_Glycos_transf_2	17	18661	TRUE
GT2_Glycos_transf_2_GT2_Glycos_transf_2	GT2_Glycos_transf_2	GT2_Glycos_transf_2	17	18895	TRUE
GT2_Glycos_transf_2_GT2_Glycos_transf_2	GT2_Glycos_transf_2	GT2_Glycos_transf_2	17	19937	TRUE
GT2_Glycos_transf_2_GT2_Glycos_transf_2	GT2_Glycos_transf_2	GT2_Glycos_transf_2	17	20589	TRUE
GT2_Glycos_transf_2_GT2_Glycos_transf_2	GT2_Glycos_transf_2	GT2_Glycos_transf_2	17	21310	TRUE
GT2_Glycos_transf_2_GT2_Glycos_transf_2	GT2_Glycos_transf_2	GT2_Glycos_transf_2	17	21753	TRUE
GT2_Glycos_transf_2_GT2_Glycos_transf_2	GT2_Glycos_transf_2	GT2_Glycos_transf_2	17	21916	TRUE
GT2_Glycos_transf_2_GT2_Glycos_transf_2	GT2_Glycos_transf_2	GT2_Glycos_transf_2	17	22434	TRUE
GT2_Glycos_transf_2_GT2_Glycos_transf_2	GT2_Glycos_transf_2	GT2_Glycos_transf_2	17	22699	TRUE
GT2_Glycos_transf_2_GT2_Glycos_transf_2	GT2_Glycos_transf_2	GT2_Glycos_transf_2	17	23212	TRUE
GT2_Glycos_transf_2_GT2_Glycos_transf_2	GT2_Glycos_transf_2	GT2_Glycos_transf_2	17	24829	TRUE
GT2_Glycos_transf_2_GT2_Glycos_transf_2	GT2_Glycos_transf_2	GT2_Glycos_transf_2	17	25398	TRUE
GT2_Glycos_transf_2_GT2_Glycos_transf_2	GT2_Glycos_transf_2	GT2_Glycos_transf_2	17	28346	TRUE
GT2_Glycos_transf_2_GT2_Glycos_transf_2	GT2_Glycos_transf_2	GT2_Glycos_transf_2	17	28878	TRUE
GT2_Glycos_transf_2_GT2_Glycos_transf_2	GT2_Glycos_transf_2	GT2_Glycos_transf_2	17	30090	TRUE
GT2_Glycos_transf_2_GT2_Glycos_transf_2	GT2_Glycos_transf_2	GT2_Glycos_transf_2	170	195289	TRUE
GT2_Glycos_transf_2_GT2_Glycos_transf_2	GT2_Glycos_transf_2	GT2_Glycos_transf_2	18	13411	TRUE
GT2_Glycos_transf_2_GT2_Glycos_transf_2	GT2_Glycos_transf_2	GT2_Glycos_transf_2	18	18025	TRUE
GT2_Glycos_transf_2_GT2_Glycos_transf_2	GT2_Glycos_transf_2	GT2_Glycos_transf_2	18	18459	TRUE
GT2_Glycos_transf_2_GT2_Glycos_transf_2	GT2_Glycos_transf_2	GT2_Glycos_transf_2	18	18829	TRUE
GT2_Glycos_transf_2_GT2_Glycos_transf_2	GT2_Glycos_transf_2	GT2_Glycos_transf_2	18	19618	TRUE
GT2_Glycos_transf_2_GT2_Glycos_transf_2	GT2_Glycos_transf_2	GT2_Glycos_transf_2	18	20074	TRUE
GT2_Glycos_transf_2_GT2_Glycos_transf_2	GT2_Glycos_transf_2	GT2_Glycos_transf_2	18	21193	TRUE
GT2_Glycos_transf_2_GT2_Glycos_transf_2	GT2_Glycos_transf_2	GT2_Glycos_transf_2	18	21223	TRUE
GT2_Glycos_transf_2_GT2_Glycos_transf_2	GT2_Glycos_transf_2	GT2_Glycos_transf_2	18	21830	TRUE
GT2_Glycos_transf_2_GT2_Glycos_transf_2	GT2_Glycos_transf_2	GT2_Glycos_transf_2	18	22328	TRUE
GT2_Glycos_transf_2_GT2_Glycos_transf_2	GT2_Glycos_transf_2	GT2_Glycos_transf_2	18	23900	TRUE
GT2_Glycos_transf_2_GT2_Glycos_transf_2	GT2_Glycos_transf_2	GT2_Glycos_transf_2	18	23948	TRUE
GT2_Glycos_transf_2_GT2_Glycos_transf_2	GT2_Glycos_transf_2	GT2_Glycos_transf_2	18	24195	TRUE
GT2_Glycos_transf_2_GT2_Glycos_transf_2	GT2_Glycos_transf_2	GT2_Glycos_transf_2	18	27001	TRUE
GT2_Glycos_transf_2_GT2_Glycos_transf_2	GT2_Glycos_transf_2	GT2_Glycos_transf_2	18	30301	TRUE
GT2_Glycos_transf_2_GT2_Glycos_transf_2	GT2_Glycos_transf_2	GT2_Glycos_transf_2	181	178361	TRUE
GT2_Glycos_transf_2_GT2_Glycos_transf_2	GT2_Glycos_transf_2	GT2_Glycos_transf_2	19	14330	TRUE
GT2_Glycos_transf_2_GT2_Glycos_transf_2	GT2_Glycos_transf_2	GT2_Glycos_transf_2	19	14473	TRUE
GT2_Glycos_transf_2_GT2_Glycos_transf_2	GT2_Glycos_transf_2	GT2_Glycos_transf_2	19	15325	TRUE
GT2_Glycos_transf_2_GT2_Glycos_transf_2	GT2_Glycos_transf_2	GT2_Glycos_transf_2	19	16245	TRUE
GT2_Glycos_transf_2_GT2_Glycos_transf_2	GT2_Glycos_transf_2	GT2_Glycos_transf_2	19	17279	TRUE
GT2_Glycos_transf_2_GT2_Glycos_transf_2	GT2_Glycos_transf_2	GT2_Glycos_transf_2	19	19189	TRUE
GT2_Glycos_transf_2_GT2_Glycos_transf_2	GT2_Glycos_transf_2	GT2_Glycos_transf_2	19	19376	TRUE
GT2_Glycos_transf_2_GT2_Glycos_transf_2	GT2_Glycos_transf_2	GT2_Glycos_transf_2	19	20491	TRUE
GT2_Glycos_transf_2_GT2_Glycos_transf_2	GT2_Glycos_transf_2	GT2_Glycos_transf_2	19	20638	TRUE
GT2_Glycos_transf_2_GT2_Glycos_transf_2	GT2_Glycos_transf_2	GT2_Glycos_transf_2	19	22232	TRUE
GT2_Glycos_transf_2_GT2_Glycos_transf_2	GT2_Glycos_transf_2	GT2_Glycos_transf_2	19	22311	TRUE
GT2_Glycos_transf_2_GT2_Glycos_transf_2	GT2_Glycos_transf_2	GT2_Glycos_transf_2	19	22694	TRUE
GT2_Glycos_transf_2_GT2_Glycos_transf_2	GT2_Glycos_transf_2	GT2_Glycos_transf_2	19	22983	TRUE
GT2_Glycos_transf_2_GT2_Glycos_transf_2	GT2_Glycos_transf_2	GT2_Glycos_transf_2	19	23366	TRUE
GT2_Glycos_transf_2_GT2_Glycos_transf_2	GT2_Glycos_transf_2	GT2_Glycos_transf_2	19	23435	TRUE
GT2_Glycos_transf_2_GT2_Glycos_transf_2	GT2_Glycos_transf_2	GT2_Glycos_transf_2	19	24378	TRUE
GT2_Glycos_transf_2_GT2_Glycos_transf_2	GT2_Glycos_transf_2	GT2_Glycos_transf_2	19	25149	TRUE
GT2_Glycos_transf_2_GT2_Glycos_transf_2	GT2_Glycos_transf_2	GT2_Glycos_transf_2	19	26687	TRUE
GT2_Glycos_transf_2_GT2_Glycos_transf_2	GT2_Glycos_transf_2	GT2_Glycos_transf_2	19	27575	TRUE
GT2_Glycos_transf_2_GT2_Glycos_transf_2	GT2_Glycos_transf_2	GT2_Glycos_transf_2	19	28902	TRUE
GT2_Glycos_transf_2_GT2_Glycos_transf_2	GT2_Glycos_transf_2	GT2_Glycos_transf_2	19	32409	TRUE
GT2_Glycos_transf_2_GT2_Glycos_transf_2	GT2_Glycos_transf_2	GT2_Glycos_transf_2	19	34533	TRUE
GT2_Glycos_transf_2_GT2_Glycos_transf_2	GT2_Glycos_transf_2	GT2_Glycos_transf_2	199	201985	TRUE
GT2_Glycos_transf_2_GT2_Glycos_transf_2	GT2_Glycos_transf_2	GT2_Glycos_transf_2	2	1083	TRUE
GT2_Glycos_transf_2_GT2_Glycos_transf_2	GT2_Glycos_transf_2	GT2_Glycos_transf_2	2	1092	TRUE
GT2_Glycos_transf_2_GT2_Glycos_transf_2	GT2_Glycos_transf_2	GT2_Glycos_transf_2	2	1129	TRUE
GT2_Glycos_transf_2_GT2_Glycos_transf_2	GT2_Glycos_transf_2	GT2_Glycos_transf_2	2	1287	TRUE
GT2_Glycos_transf_2_GT2_Glycos_transf_2	GT2_Glycos_transf_2	GT2_Glycos_transf_2	2	1287	TRUE
GT2_Glycos_transf_2_GT2_Glycos_transf_2	GT2_Glycos_transf_2	GT2_Glycos_transf_2	2	1351	TRUE
GT2_Glycos_transf_2_GT2_Glycos_transf_2	GT2_Glycos_transf_2	GT2_Glycos_transf_2	2	1359	TRUE
GT2_Glycos_transf_2_GT2_Glycos_transf_2	GT2_Glycos_transf_2	GT2_Glycos_transf_2	2	1440	TRUE
GT2_Glycos_transf_2_GT2_Glycos_transf_2	GT2_Glycos_transf_2	GT2_Glycos_transf_2	2	1451	TRUE
GT2_Glycos_transf_2_GT2_Glycos_transf_2	GT2_Glycos_transf_2	GT2_Glycos_transf_2	2	1477	TRUE
GT2_Glycos_transf_2_GT2_Glycos_transf_2	GT2_Glycos_transf_2	GT2_Glycos_transf_2	2	1493	TRUE
GT2_Glycos_transf_2_GT2_Glycos_transf_2	GT2_Glycos_transf_2	GT2_Glycos_transf_2	2	1521	TRUE
GT2_Glycos_transf_2_GT2_Glycos_transf_2	GT2_Glycos_transf_2	GT2_Glycos_transf_2	2	1536	TRUE
GT2_Glycos_transf_2_GT2_Glycos_transf_2	GT2_Glycos_transf_2	GT2_Glycos_transf_2	2	1590	TRUE
GT2_Glycos_transf_2_GT2_Glycos_transf_2	GT2_Glycos_transf_2	GT2_Glycos_transf_2	2	1597	TRUE
GT2_Glycos_transf_2_GT2_Glycos_transf_2	GT2_Glycos_transf_2	GT2_Glycos_transf_2	2	1601	TRUE
GT2_Glycos_transf_2_GT2_Glycos_transf_2	GT2_Glycos_transf_2	GT2_Glycos_transf_2	2	1615	TRUE
GT2_Glycos_transf_2_GT2_Glycos_transf_2	GT2_Glycos_transf_2	GT2_Glycos_transf_2	2	1618	TRUE
GT2_Glycos_transf_2_GT2_Glycos_transf_2	GT2_Glycos_transf_2	GT2_Glycos_transf_2	2	1636	TRUE
GT2_Glycos_transf_2_GT2_Glycos_transf_2	GT2_Glycos_transf_2	GT2_Glycos_transf_2	2	1648	TRUE
GT2_Glycos_transf_2_GT2_Glycos_transf_2	GT2_Glycos_transf_2	GT2_Glycos_transf_2	2	1668	TRUE
GT2_Glycos_transf_2_GT2_Glycos_transf_2	GT2_Glycos_transf_2	GT2_Glycos_transf_2	2	1669	TRUE
GT2_Glycos_transf_2_GT2_Glycos_transf_2	GT2_Glycos_transf_2	GT2_Glycos_transf_2	2	1679	TRUE
GT2_Glycos_transf_2_GT2_Glycos_transf_2	GT2_Glycos_transf_2	GT2_Glycos_transf_2	2	1702	TRUE
GT2_Glycos_transf_2_GT2_Glycos_transf_2	GT2_Glycos_transf_2	GT2_Glycos_transf_2	2	1709	TRUE
GT2_Glycos_transf_2_GT2_Glycos_transf_2	GT2_Glycos_transf_2	GT2_Glycos_transf_2	2	1710	TRUE
GT2_Glycos_transf_2_GT2_Glycos_transf_2	GT2_Glycos_transf_2	GT2_Glycos_transf_2	2	1717	TRUE
GT2_Glycos_transf_2_GT2_Glycos_transf_2	GT2_Glycos_transf_2	GT2_Glycos_transf_2	2	1720	TRUE
GT2_Glycos_transf_2_GT2_Glycos_transf_2	GT2_Glycos_transf_2	GT2_Glycos_transf_2	2	1726	TRUE
GT2_Glycos_transf_2_GT2_Glycos_transf_2	GT2_Glycos_transf_2	GT2_Glycos_transf_2	2	1727	TRUE
GT2_Glycos_transf_2_GT2_Glycos_transf_2	GT2_Glycos_transf_2	GT2_Glycos_transf_2	2	1740	TRUE
GT2_Glycos_transf_2_GT2_Glycos_transf_2	GT2_Glycos_transf_2	GT2_Glycos_transf_2	2	1745	TRUE
GT2_Glycos_transf_2_GT2_Glycos_transf_2	GT2_Glycos_transf_2	GT2_Glycos_transf_2	2	1771	TRUE
GT2_Glycos_transf_2_GT2_Glycos_transf_2	GT2_Glycos_transf_2	GT2_Glycos_transf_2	2	1774	TRUE
GT2_Glycos_transf_2_GT2_Glycos_transf_2	GT2_Glycos_transf_2	GT2_Glycos_transf_2	2	1784	TRUE
GT2_Glycos_transf_2_GT2_Glycos_transf_2	GT2_Glycos_transf_2	GT2_Glycos_transf_2	2	1786	TRUE
GT2_Glycos_transf_2_GT2_Glycos_transf_2	GT2_Glycos_transf_2	GT2_Glycos_transf_2	2	1793	TRUE
GT2_Glycos_transf_2_GT2_Glycos_transf_2	GT2_Glycos_transf_2	GT2_Glycos_transf_2	2	1793	TRUE
GT2_Glycos_transf_2_GT2_Glycos_transf_2	GT2_Glycos_transf_2	GT2_Glycos_transf_2	2	1797	TRUE
GT2_Glycos_transf_2_GT2_Glycos_transf_2	GT2_Glycos_transf_2	GT2_Glycos_transf_2	2	1800	TRUE
GT2_Glycos_transf_2_GT2_Glycos_transf_2	GT2_Glycos_transf_2	GT2_Glycos_transf_2	2	1814	TRUE
GT2_Glycos_transf_2_GT2_Glycos_transf_2	GT2_Glycos_transf_2	GT2_Glycos_transf_2	2	1830	TRUE
GT2_Glycos_transf_2_GT2_Glycos_transf_2	GT2_Glycos_transf_2	GT2_Glycos_transf_2	2	1832	TRUE
GT2_Glycos_transf_2_GT2_Glycos_transf_2	GT2_Glycos_transf_2	GT2_Glycos_transf_2	2	1839	TRUE
GT2_Glycos_transf_2_GT2_Glycos_transf_2	GT2_Glycos_transf_2	GT2_Glycos_transf_2	2	1846	TRUE
GT2_Glycos_transf_2_GT2_Glycos_transf_2	GT2_Glycos_transf_2	GT2_Glycos_transf_2	2	1848	TRUE
GT2_Glycos_transf_2_GT2_Glycos_transf_2	GT2_Glycos_transf_2	GT2_Glycos_transf_2	2	1855	TRUE
GT2_Glycos_transf_2_GT2_Glycos_transf_2	GT2_Glycos_transf_2	GT2_Glycos_transf_2	2	1859	TRUE
GT2_Glycos_transf_2_GT2_Glycos_transf_2	GT2_Glycos_transf_2	GT2_Glycos_transf_2	2	1876	TRUE
GT2_Glycos_transf_2_GT2_Glycos_transf_2	GT2_Glycos_transf_2	GT2_Glycos_transf_2	2	1880	TRUE
GT2_Glycos_transf_2_GT2_Glycos_transf_2	GT2_Glycos_transf_2	GT2_Glycos_transf_2	2	1885	TRUE
GT2_Glycos_transf_2_GT2_Glycos_transf_2	GT2_Glycos_transf_2	GT2_Glycos_transf_2	2	1893	TRUE
GT2_Glycos_transf_2_GT2_Glycos_transf_2	GT2_Glycos_transf_2	GT2_Glycos_transf_2	2	1902	TRUE
GT2_Glycos_transf_2_GT2_Glycos_transf_2	GT2_Glycos_transf_2	GT2_Glycos_transf_2	2	1903	TRUE
GT2_Glycos_transf_2_GT2_Glycos_transf_2	GT2_Glycos_transf_2	GT2_Glycos_transf_2	2	1934	TRUE
GT2_Glycos_transf_2_GT2_Glycos_transf_2	GT2_Glycos_transf_2	GT2_Glycos_transf_2	2	1934	TRUE
GT2_Glycos_transf_2_GT2_Glycos_transf_2	GT2_Glycos_transf_2	GT2_Glycos_transf_2	2	1935	TRUE
GT2_Glycos_transf_2_GT2_Glycos_transf_2	GT2_Glycos_transf_2	GT2_Glycos_transf_2	2	1937	TRUE
GT2_Glycos_transf_2_GT2_Glycos_transf_2	GT2_Glycos_transf_2	GT2_Glycos_transf_2	2	1948	TRUE
GT2_Glycos_transf_2_GT2_Glycos_transf_2	GT2_Glycos_transf_2	GT2_Glycos_transf_2	2	1956	TRUE
GT2_Glycos_transf_2_GT2_Glycos_transf_2	GT2_Glycos_transf_2	GT2_Glycos_transf_2	2	1965	TRUE
GT2_Glycos_transf_2_GT2_Glycos_transf_2	GT2_Glycos_transf_2	GT2_Glycos_transf_2	2	1970	TRUE
GT2_Glycos_transf_2_GT2_Glycos_transf_2	GT2_Glycos_transf_2	GT2_Glycos_transf_2	2	2011	TRUE
GT2_Glycos_transf_2_GT2_Glycos_transf_2	GT2_Glycos_transf_2	GT2_Glycos_transf_2	2	2013	TRUE
GT2_Glycos_transf_2_GT2_Glycos_transf_2	GT2_Glycos_transf_2	GT2_Glycos_transf_2	2	2019	TRUE
GT2_Glycos_transf_2_GT2_Glycos_transf_2	GT2_Glycos_transf_2	GT2_Glycos_transf_2	2	2024	TRUE
GT2_Glycos_transf_2_GT2_Glycos_transf_2	GT2_Glycos_transf_2	GT2_Glycos_transf_2	2	2025	TRUE
GT2_Glycos_transf_2_GT2_Glycos_transf_2	GT2_Glycos_transf_2	GT2_Glycos_transf_2	2	2031	TRUE
GT2_Glycos_transf_2_GT2_Glycos_transf_2	GT2_Glycos_transf_2	GT2_Glycos_transf_2	2	2035	TRUE
GT2_Glycos_transf_2_GT2_Glycos_transf_2	GT2_Glycos_transf_2	GT2_Glycos_transf_2	2	2037	TRUE
GT2_Glycos_transf_2_GT2_Glycos_transf_2	GT2_Glycos_transf_2	GT2_Glycos_transf_2	2	2041	TRUE
GT2_Glycos_transf_2_GT2_Glycos_transf_2	GT2_Glycos_transf_2	GT2_Glycos_transf_2	2	2043	TRUE
GT2_Glycos_transf_2_GT2_Glycos_transf_2	GT2_Glycos_transf_2	GT2_Glycos_transf_2	2	2046	TRUE
GT2_Glycos_transf_2_GT2_Glycos_transf_2	GT2_Glycos_transf_2	GT2_Glycos_transf_2	2	2062	TRUE
GT2_Glycos_transf_2_GT2_Glycos_transf_2	GT2_Glycos_transf_2	GT2_Glycos_transf_2	2	2077	TRUE
GT2_Glycos_transf_2_GT2_Glycos_transf_2	GT2_Glycos_transf_2	GT2_Glycos_transf_2	2	2085	TRUE
GT2_Glycos_transf_2_GT2_Glycos_transf_2	GT2_Glycos_transf_2	GT2_Glycos_transf_2	2	2088	TRUE
GT2_Glycos_transf_2_GT2_Glycos_transf_2	GT2_Glycos_transf_2	GT2_Glycos_transf_2	2	2096	TRUE
GT2_Glycos_transf_2_GT2_Glycos_transf_2	GT2_Glycos_transf_2	GT2_Glycos_transf_2	2	2098	TRUE
GT2_Glycos_transf_2_GT2_Glycos_transf_2	GT2_Glycos_transf_2	GT2_Glycos_transf_2	2	2103	TRUE
GT2_Glycos_transf_2_GT2_Glycos_transf_2	GT2_Glycos_transf_2	GT2_Glycos_transf_2	2	2107	TRUE
GT2_Glycos_transf_2_GT2_Glycos_transf_2	GT2_Glycos_transf_2	GT2_Glycos_transf_2	2	2116	TRUE
GT2_Glycos_transf_2_GT2_Glycos_transf_2	GT2_Glycos_transf_2	GT2_Glycos_transf_2	2	2117	TRUE
GT2_Glycos_transf_2_GT2_Glycos_transf_2	GT2_Glycos_transf_2	GT2_Glycos_transf_2	2	2126	TRUE
GT2_Glycos_transf_2_GT2_Glycos_transf_2	GT2_Glycos_transf_2	GT2_Glycos_transf_2	2	2127	TRUE
GT2_Glycos_transf_2_GT2_Glycos_transf_2	GT2_Glycos_transf_2	GT2_Glycos_transf_2	2	2128	TRUE
GT2_Glycos_transf_2_GT2_Glycos_transf_2	GT2_Glycos_transf_2	GT2_Glycos_transf_2	2	2129	TRUE
GT2_Glycos_transf_2_GT2_Glycos_transf_2	GT2_Glycos_transf_2	GT2_Glycos_transf_2	2	2131	TRUE
GT2_Glycos_transf_2_GT2_Glycos_transf_2	GT2_Glycos_transf_2	GT2_Glycos_transf_2	2	2132	TRUE
GT2_Glycos_transf_2_GT2_Glycos_transf_2	GT2_Glycos_transf_2	GT2_Glycos_transf_2	2	2134	TRUE
GT2_Glycos_transf_2_GT2_Glycos_transf_2	GT2_Glycos_transf_2	GT2_Glycos_transf_2	2	2154	TRUE
GT2_Glycos_transf_2_GT2_Glycos_transf_2	GT2_Glycos_transf_2	GT2_Glycos_transf_2	2	2157	TRUE
GT2_Glycos_transf_2_GT2_Glycos_transf_2	GT2_Glycos_transf_2	GT2_Glycos_transf_2	2	2159	TRUE
GT2_Glycos_transf_2_GT2_Glycos_transf_2	GT2_Glycos_transf_2	GT2_Glycos_transf_2	2	2168	TRUE
GT2_Glycos_transf_2_GT2_Glycos_transf_2	GT2_Glycos_transf_2	GT2_Glycos_transf_2	2	2176	TRUE
GT2_Glycos_transf_2_GT2_Glycos_transf_2	GT2_Glycos_transf_2	GT2_Glycos_transf_2	2	2182	TRUE
GT2_Glycos_transf_2_GT2_Glycos_transf_2	GT2_Glycos_transf_2	GT2_Glycos_transf_2	2	2184	TRUE
GT2_Glycos_transf_2_GT2_Glycos_transf_2	GT2_Glycos_transf_2	GT2_Glycos_transf_2	2	2188	TRUE
GT2_Glycos_transf_2_GT2_Glycos_transf_2	GT2_Glycos_transf_2	GT2_Glycos_transf_2	2	2200	TRUE
GT2_Glycos_transf_2_GT2_Glycos_transf_2	GT2_Glycos_transf_2	GT2_Glycos_transf_2	2	2204	TRUE
GT2_Glycos_transf_2_GT2_Glycos_transf_2	GT2_Glycos_transf_2	GT2_Glycos_transf_2	2	2205	TRUE
GT2_Glycos_transf_2_GT2_Glycos_transf_2	GT2_Glycos_transf_2	GT2_Glycos_transf_2	2	2214	TRUE
GT2_Glycos_transf_2_GT2_Glycos_transf_2	GT2_Glycos_transf_2	GT2_Glycos_transf_2	2	2214	TRUE
GT2_Glycos_transf_2_GT2_Glycos_transf_2	GT2_Glycos_transf_2	GT2_Glycos_transf_2	2	2216	TRUE
GT2_Glycos_transf_2_GT2_Glycos_transf_2	GT2_Glycos_transf_2	GT2_Glycos_transf_2	2	2217	TRUE
GT2_Glycos_transf_2_GT2_Glycos_transf_2	GT2_Glycos_transf_2	GT2_Glycos_transf_2	2	2218	TRUE
GT2_Glycos_transf_2_GT2_Glycos_transf_2	GT2_Glycos_transf_2	GT2_Glycos_transf_2	2	2218	TRUE
GT2_Glycos_transf_2_GT2_Glycos_transf_2	GT2_Glycos_transf_2	GT2_Glycos_transf_2	2	2222	TRUE
GT2_Glycos_transf_2_GT2_Glycos_transf_2	GT2_Glycos_transf_2	GT2_Glycos_transf_2	2	2251	TRUE
GT2_Glycos_transf_2_GT2_Glycos_transf_2	GT2_Glycos_transf_2	GT2_Glycos_transf_2	2	2266	TRUE
GT2_Glycos_transf_2_GT2_Glycos_transf_2	GT2_Glycos_transf_2	GT2_Glycos_transf_2	2	2267	TRUE
GT2_Glycos_transf_2_GT2_Glycos_transf_2	GT2_Glycos_transf_2	GT2_Glycos_transf_2	2	2267	TRUE
GT2_Glycos_transf_2_GT2_Glycos_transf_2	GT2_Glycos_transf_2	GT2_Glycos_transf_2	2	2268	TRUE
GT2_Glycos_transf_2_GT2_Glycos_transf_2	GT2_Glycos_transf_2	GT2_Glycos_transf_2	2	2271	TRUE
GT2_Glycos_transf_2_GT2_Glycos_transf_2	GT2_Glycos_transf_2	GT2_Glycos_transf_2	2	2278	TRUE
GT2_Glycos_transf_2_GT2_Glycos_transf_2	GT2_Glycos_transf_2	GT2_Glycos_transf_2	2	2278	TRUE
GT2_Glycos_transf_2_GT2_Glycos_transf_2	GT2_Glycos_transf_2	GT2_Glycos_transf_2	2	2282	TRUE
GT2_Glycos_transf_2_GT2_Glycos_transf_2	GT2_Glycos_transf_2	GT2_Glycos_transf_2	2	2289	TRUE
GT2_Glycos_transf_2_GT2_Glycos_transf_2	GT2_Glycos_transf_2	GT2_Glycos_transf_2	2	2291	TRUE
GT2_Glycos_transf_2_GT2_Glycos_transf_2	GT2_Glycos_transf_2	GT2_Glycos_transf_2	2	2356	TRUE
GT2_Glycos_transf_2_GT2_Glycos_transf_2	GT2_Glycos_transf_2	GT2_Glycos_transf_2	2	2359	TRUE
GT2_Glycos_transf_2_GT2_Glycos_transf_2	GT2_Glycos_transf_2	GT2_Glycos_transf_2	2	2367	TRUE
GT2_Glycos_transf_2_GT2_Glycos_transf_2	GT2_Glycos_transf_2	GT2_Glycos_transf_2	2	2394	TRUE
GT2_Glycos_transf_2_GT2_Glycos_transf_2	GT2_Glycos_transf_2	GT2_Glycos_transf_2	2	2405	TRUE
GT2_Glycos_transf_2_GT2_Glycos_transf_2	GT2_Glycos_transf_2	GT2_Glycos_transf_2	2	2410	TRUE
GT2_Glycos_transf_2_GT2_Glycos_transf_2	GT2_Glycos_transf_2	GT2_Glycos_transf_2	2	2411	TRUE
GT2_Glycos_transf_2_GT2_Glycos_transf_2	GT2_Glycos_transf_2	GT2_Glycos_transf_2	2	2456	TRUE
GT2_Glycos_transf_2_GT2_Glycos_transf_2	GT2_Glycos_transf_2	GT2_Glycos_transf_2	2	2462	TRUE
GT2_Glycos_transf_2_GT2_Glycos_transf_2	GT2_Glycos_transf_2	GT2_Glycos_transf_2	2	2499	TRUE
GT2_Glycos_transf_2_GT2_Glycos_transf_2	GT2_Glycos_transf_2	GT2_Glycos_transf_2	2	2502	TRUE
GT2_Glycos_transf_2_GT2_Glycos_transf_2	GT2_Glycos_transf_2	GT2_Glycos_transf_2	2	2513	TRUE
GT2_Glycos_transf_2_GT2_Glycos_transf_2	GT2_Glycos_transf_2	GT2_Glycos_transf_2	2	2515	TRUE
GT2_Glycos_transf_2_GT2_Glycos_transf_2	GT2_Glycos_transf_2	GT2_Glycos_transf_2	2	2531	TRUE
GT2_Glycos_transf_2_GT2_Glycos_transf_2	GT2_Glycos_transf_2	GT2_Glycos_transf_2	2	2531	TRUE
GT2_Glycos_transf_2_GT2_Glycos_transf_2	GT2_Glycos_transf_2	GT2_Glycos_transf_2	2	2532	TRUE
GT2_Glycos_transf_2_GT2_Glycos_transf_2	GT2_Glycos_transf_2	GT2_Glycos_transf_2	2	2537	TRUE
GT2_Glycos_transf_2_GT2_Glycos_transf_2	GT2_Glycos_transf_2	GT2_Glycos_transf_2	2	2552	TRUE
GT2_Glycos_transf_2_GT2_Glycos_transf_2	GT2_Glycos_transf_2	GT2_Glycos_transf_2	2	2559	TRUE
GT2_Glycos_transf_2_GT2_Glycos_transf_2	GT2_Glycos_transf_2	GT2_Glycos_transf_2	2	2566	TRUE
GT2_Glycos_transf_2_GT2_Glycos_transf_2	GT2_Glycos_transf_2	GT2_Glycos_transf_2	2	2590	TRUE
GT2_Glycos_transf_2_GT2_Glycos_transf_2	GT2_Glycos_transf_2	GT2_Glycos_transf_2	2	2605	TRUE
GT2_Glycos_transf_2_GT2_Glycos_transf_2	GT2_Glycos_transf_2	GT2_Glycos_transf_2	2	2610	TRUE
GT2_Glycos_transf_2_GT2_Glycos_transf_2	GT2_Glycos_transf_2	GT2_Glycos_transf_2	2	2624	TRUE
GT2_Glycos_transf_2_GT2_Glycos_transf_2	GT2_Glycos_transf_2	GT2_Glycos_transf_2	2	2670	TRUE
GT2_Glycos_transf_2_GT2_Glycos_transf_2	GT2_Glycos_transf_2	GT2_Glycos_transf_2	2	2686	TRUE
GT2_Glycos_transf_2_GT2_Glycos_transf_2	GT2_Glycos_transf_2	GT2_Glycos_transf_2	2	2715	TRUE
GT2_Glycos_transf_2_GT2_Glycos_transf_2	GT2_Glycos_transf_2	GT2_Glycos_transf_2	2	2757	TRUE
GT2_Glycos_transf_2_GT2_Glycos_transf_2	GT2_Glycos_transf_2	GT2_Glycos_transf_2	2	2766	TRUE
GT2_Glycos_transf_2_GT2_Glycos_transf_2	GT2_Glycos_transf_2	GT2_Glycos_transf_2	2	2786	TRUE
GT2_Glycos_transf_2_GT2_Glycos_transf_2	GT2_Glycos_transf_2	GT2_Glycos_transf_2	2	2796	TRUE
GT2_Glycos_transf_2_GT2_Glycos_transf_2	GT2_Glycos_transf_2	GT2_Glycos_transf_2	2	2805	TRUE
GT2_Glycos_transf_2_GT2_Glycos_transf_2	GT2_Glycos_transf_2	GT2_Glycos_transf_2	2	2814	TRUE
GT2_Glycos_transf_2_GT2_Glycos_transf_2	GT2_Glycos_transf_2	GT2_Glycos_transf_2	2	2816	TRUE
GT2_Glycos_transf_2_GT2_Glycos_transf_2	GT2_Glycos_transf_2	GT2_Glycos_transf_2	2	2826	TRUE
GT2_Glycos_transf_2_GT2_Glycos_transf_2	GT2_Glycos_transf_2	GT2_Glycos_transf_2	2	2868	TRUE
GT2_Glycos_transf_2_GT2_Glycos_transf_2	GT2_Glycos_transf_2	GT2_Glycos_transf_2	2	2882	TRUE
GT2_Glycos_transf_2_GT2_Glycos_transf_2	GT2_Glycos_transf_2	GT2_Glycos_transf_2	2	2945	TRUE
GT2_Glycos_transf_2_GT2_Glycos_transf_2	GT2_Glycos_transf_2	GT2_Glycos_transf_2	2	2997	TRUE
GT2_Glycos_transf_2_GT2_Glycos_transf_2	GT2_Glycos_transf_2	GT2_Glycos_transf_2	2	3000	TRUE
GT2_Glycos_transf_2_GT2_Glycos_transf_2	GT2_Glycos_transf_2	GT2_Glycos_transf_2	2	3279	TRUE
GT2_Glycos_transf_2_GT2_Glycos_transf_2	GT2_Glycos_transf_2	GT2_Glycos_transf_2	2	3280	TRUE
GT2_Glycos_transf_2_GT2_Glycos_transf_2	GT2_Glycos_transf_2	GT2_Glycos_transf_2	2	3295	TRUE
GT2_Glycos_transf_2_GT2_Glycos_transf_2	GT2_Glycos_transf_2	GT2_Glycos_transf_2	2	3392	TRUE
GT2_Glycos_transf_2_GT2_Glycos_transf_2	GT2_Glycos_transf_2	GT2_Glycos_transf_2	2	3393	TRUE
GT2_Glycos_transf_2_GT2_Glycos_transf_2	GT2_Glycos_transf_2	GT2_Glycos_transf_2	2	3406	TRUE
GT2_Glycos_transf_2_GT2_Glycos_transf_2	GT2_Glycos_transf_2	GT2_Glycos_transf_2	2	3454	TRUE
GT2_Glycos_transf_2_GT2_Glycos_transf_2	GT2_Glycos_transf_2	GT2_Glycos_transf_2	2	3469	TRUE
GT2_Glycos_transf_2_GT2_Glycos_transf_2	GT2_Glycos_transf_2	GT2_Glycos_transf_2	2	3476	TRUE
GT2_Glycos_transf_2_GT2_Glycos_transf_2	GT2_Glycos_transf_2	GT2_Glycos_transf_2	2	3488	TRUE
GT2_Glycos_transf_2_GT2_Glycos_transf_2	GT2_Glycos_transf_2	GT2_Glycos_transf_2	2	3488	TRUE
GT2_Glycos_transf_2_GT2_Glycos_transf_2	GT2_Glycos_transf_2	GT2_Glycos_transf_2	2	3531	TRUE
GT2_Glycos_transf_2_GT2_Glycos_transf_2	GT2_Glycos_transf_2	GT2_Glycos_transf_2	2	3544	TRUE
GT2_Glycos_transf_2_GT2_Glycos_transf_2	GT2_Glycos_transf_2	GT2_Glycos_transf_2	2	3639	TRUE
GT2_Glycos_transf_2_GT2_Glycos_transf_2	GT2_Glycos_transf_2	GT2_Glycos_transf_2	2	3672	TRUE
GT2_Glycos_transf_2_GT2_Glycos_transf_2	GT2_Glycos_transf_2	GT2_Glycos_transf_2	2	3784	TRUE
GT2_Glycos_transf_2_GT2_Glycos_transf_2	GT2_Glycos_transf_2	GT2_Glycos_transf_2	2	3791	TRUE
GT2_Glycos_transf_2_GT2_Glycos_transf_2	GT2_Glycos_transf_2	GT2_Glycos_transf_2	2	3930	TRUE
GT2_Glycos_transf_2_GT2_Glycos_transf_2	GT2_Glycos_transf_2	GT2_Glycos_transf_2	2	3997	TRUE
GT2_Glycos_transf_2_GT2_Glycos_transf_2	GT2_Glycos_transf_2	GT2_Glycos_transf_2	2	4063	TRUE
GT2_Glycos_transf_2_GT2_Glycos_transf_2	GT2_Glycos_transf_2	GT2_Glycos_transf_2	2	4073	TRUE
GT2_Glycos_transf_2_GT2_Glycos_transf_2	GT2_Glycos_transf_2	GT2_Glycos_transf_2	2	4259	TRUE
GT2_Glycos_transf_2_GT2_Glycos_transf_2	GT2_Glycos_transf_2	GT2_Glycos_transf_2	2	4708	TRUE
GT2_Glycos_transf_2_GT2_Glycos_transf_2	GT2_Glycos_transf_2	GT2_Glycos_transf_2	2	4896	TRUE
GT2_Glycos_transf_2_GT2_Glycos_transf_2	GT2_Glycos_transf_2	GT2_Glycos_transf_2	2	5166	TRUE
GT2_Glycos_transf_2_GT2_Glycos_transf_2	GT2_Glycos_transf_2	GT2_Glycos_transf_2	20	15392	TRUE
GT2_Glycos_transf_2_GT2_Glycos_transf_2	GT2_Glycos_transf_2	GT2_Glycos_transf_2	20	16161	TRUE
GT2_Glycos_transf_2_GT2_Glycos_transf_2	GT2_Glycos_transf_2	GT2_Glycos_transf_2	20	16422	TRUE
GT2_Glycos_transf_2_GT2_Glycos_transf_2	GT2_Glycos_transf_2	GT2_Glycos_transf_2	20	16619	TRUE
GT2_Glycos_transf_2_GT2_Glycos_transf_2	GT2_Glycos_transf_2	GT2_Glycos_transf_2	20	19885	TRUE
GT2_Glycos_transf_2_GT2_Glycos_transf_2	GT2_Glycos_transf_2	GT2_Glycos_transf_2	20	20319	TRUE
GT2_Glycos_transf_2_GT2_Glycos_transf_2	GT2_Glycos_transf_2	GT2_Glycos_transf_2	20	20870	TRUE
GT2_Glycos_transf_2_GT2_Glycos_transf_2	GT2_Glycos_transf_2	GT2_Glycos_transf_2	20	20904	TRUE
GT2_Glycos_transf_2_GT2_Glycos_transf_2	GT2_Glycos_transf_2	GT2_Glycos_transf_2	20	21824	TRUE
GT2_Glycos_transf_2_GT2_Glycos_transf_2	GT2_Glycos_transf_2	GT2_Glycos_transf_2	20	23283	TRUE
GT2_Glycos_transf_2_GT2_Glycos_transf_2	GT2_Glycos_transf_2	GT2_Glycos_transf_2	20	24546	TRUE
GT2_Glycos_transf_2_GT2_Glycos_transf_2	GT2_Glycos_transf_2	GT2_Glycos_transf_2	20	26322	TRUE
GT2_Glycos_transf_2_GT2_Glycos_transf_2	GT2_Glycos_transf_2	GT2_Glycos_transf_2	20	27227	TRUE
GT2_Glycos_transf_2_GT2_Glycos_transf_2	GT2_Glycos_transf_2	GT2_Glycos_transf_2	20	35129	TRUE
GT2_Glycos_transf_2_GT2_Glycos_transf_2	GT2_Glycos_transf_2	GT2_Glycos_transf_2	21	18544	TRUE
GT2_Glycos_transf_2_GT2_Glycos_transf_2	GT2_Glycos_transf_2	GT2_Glycos_transf_2	21	19557	TRUE
GT2_Glycos_transf_2_GT2_Glycos_transf_2	GT2_Glycos_transf_2	GT2_Glycos_transf_2	21	19568	TRUE
GT2_Glycos_transf_2_GT2_Glycos_transf_2	GT2_Glycos_transf_2	GT2_Glycos_transf_2	21	20770	TRUE
GT2_Glycos_transf_2_GT2_Glycos_transf_2	GT2_Glycos_transf_2	GT2_Glycos_transf_2	21	21459	TRUE
GT2_Glycos_transf_2_GT2_Glycos_transf_2	GT2_Glycos_transf_2	GT2_Glycos_transf_2	21	22937	TRUE
GT2_Glycos_transf_2_GT2_Glycos_transf_2	GT2_Glycos_transf_2	GT2_Glycos_transf_2	21	24012	TRUE
GT2_Glycos_transf_2_GT2_Glycos_transf_2	GT2_Glycos_transf_2	GT2_Glycos_transf_2	21	24312	TRUE
GT2_Glycos_transf_2_GT2_Glycos_transf_2	GT2_Glycos_transf_2	GT2_Glycos_transf_2	21	26404	TRUE
GT2_Glycos_transf_2_GT2_Glycos_transf_2	GT2_Glycos_transf_2	GT2_Glycos_transf_2	21	28428	TRUE
GT2_Glycos_transf_2_GT2_Glycos_transf_2	GT2_Glycos_transf_2	GT2_Glycos_transf_2	21	29214	TRUE
GT2_Glycos_transf_2_GT2_Glycos_transf_2	GT2_Glycos_transf_2	GT2_Glycos_transf_2	21	29645	TRUE
GT2_Glycos_transf_2_GT2_Glycos_transf_2	GT2_Glycos_transf_2	GT2_Glycos_transf_2	21	30209	TRUE
GT2_Glycos_transf_2_GT2_Glycos_transf_2	GT2_Glycos_transf_2	GT2_Glycos_transf_2	21	37397	TRUE
GT2_Glycos_transf_2_GT2_Glycos_transf_2	GT2_Glycos_transf_2	GT2_Glycos_transf_2	215	249704	TRUE
GT2_Glycos_transf_2_GT2_Glycos_transf_2	GT2_Glycos_transf_2	GT2_Glycos_transf_2	219	299572	TRUE
GT2_Glycos_transf_2_GT2_Glycos_transf_2	GT2_Glycos_transf_2	GT2_Glycos_transf_2	22	16587	TRUE
GT2_Glycos_transf_2_GT2_Glycos_transf_2	GT2_Glycos_transf_2	GT2_Glycos_transf_2	22	20001	TRUE
GT2_Glycos_transf_2_GT2_Glycos_transf_2	GT2_Glycos_transf_2	GT2_Glycos_transf_2	22	20396	TRUE
GT2_Glycos_transf_2_GT2_Glycos_transf_2	GT2_Glycos_transf_2	GT2_Glycos_transf_2	22	20440	TRUE
GT2_Glycos_transf_2_GT2_Glycos_transf_2	GT2_Glycos_transf_2	GT2_Glycos_transf_2	22	21740	TRUE
GT2_Glycos_transf_2_GT2_Glycos_transf_2	GT2_Glycos_transf_2	GT2_Glycos_transf_2	22	22239	TRUE
GT2_Glycos_transf_2_GT2_Glycos_transf_2	GT2_Glycos_transf_2	GT2_Glycos_transf_2	22	22479	TRUE
GT2_Glycos_transf_2_GT2_Glycos_transf_2	GT2_Glycos_transf_2	GT2_Glycos_transf_2	22	23862	TRUE
GT2_Glycos_transf_2_GT2_Glycos_transf_2	GT2_Glycos_transf_2	GT2_Glycos_transf_2	22	25685	TRUE
GT2_Glycos_transf_2_GT2_Glycos_transf_2	GT2_Glycos_transf_2	GT2_Glycos_transf_2	22	30846	TRUE
GT2_Glycos_transf_2_GT2_Glycos_transf_2	GT2_Glycos_transf_2	GT2_Glycos_transf_2	22	30866	TRUE
GT2_Glycos_transf_2_GT2_Glycos_transf_2	GT2_Glycos_transf_2	GT2_Glycos_transf_2	22	31372	TRUE
GT2_Glycos_transf_2_GT2_Glycos_transf_2	GT2_Glycos_transf_2	GT2_Glycos_transf_2	23	17649	TRUE
GT2_Glycos_transf_2_GT2_Glycos_transf_2	GT2_Glycos_transf_2	GT2_Glycos_transf_2	23	19719	TRUE
GT2_Glycos_transf_2_GT2_Glycos_transf_2	GT2_Glycos_transf_2	GT2_Glycos_transf_2	23	21302	TRUE
GT2_Glycos_transf_2_GT2_Glycos_transf_2	GT2_Glycos_transf_2	GT2_Glycos_transf_2	23	22210	TRUE
GT2_Glycos_transf_2_GT2_Glycos_transf_2	GT2_Glycos_transf_2	GT2_Glycos_transf_2	23	22781	TRUE
GT2_Glycos_transf_2_GT2_Glycos_transf_2	GT2_Glycos_transf_2	GT2_Glycos_transf_2	23	22935	TRUE
GT2_Glycos_transf_2_GT2_Glycos_transf_2	GT2_Glycos_transf_2	GT2_Glycos_transf_2	23	22961	TRUE
GT2_Glycos_transf_2_GT2_Glycos_transf_2	GT2_Glycos_transf_2	GT2_Glycos_transf_2	23	26774	TRUE
GT2_Glycos_transf_2_GT2_Glycos_transf_2	GT2_Glycos_transf_2	GT2_Glycos_transf_2	23	26812	TRUE
GT2_Glycos_transf_2_GT2_Glycos_transf_2	GT2_Glycos_transf_2	GT2_Glycos_transf_2	23	32067	TRUE
GT2_Glycos_transf_2_GT2_Glycos_transf_2	GT2_Glycos_transf_2	GT2_Glycos_transf_2	23	33038	TRUE
GT2_Glycos_transf_2_GT2_Glycos_transf_2	GT2_Glycos_transf_2	GT2_Glycos_transf_2	23	33314	TRUE
GT2_Glycos_transf_2_GT2_Glycos_transf_2	GT2_Glycos_transf_2	GT2_Glycos_transf_2	23	40265	TRUE
GT2_Glycos_transf_2_GT2_Glycos_transf_2	GT2_Glycos_transf_2	GT2_Glycos_transf_2	24	18591	TRUE
GT2_Glycos_transf_2_GT2_Glycos_transf_2	GT2_Glycos_transf_2	GT2_Glycos_transf_2	24	19976	TRUE
GT2_Glycos_transf_2_GT2_Glycos_transf_2	GT2_Glycos_transf_2	GT2_Glycos_transf_2	24	22065	TRUE
GT2_Glycos_transf_2_GT2_Glycos_transf_2	GT2_Glycos_transf_2	GT2_Glycos_transf_2	24	22614	TRUE
GT2_Glycos_transf_2_GT2_Glycos_transf_2	GT2_Glycos_transf_2	GT2_Glycos_transf_2	24	23037	TRUE
GT2_Glycos_transf_2_GT2_Glycos_transf_2	GT2_Glycos_transf_2	GT2_Glycos_transf_2	24	23180	TRUE
GT2_Glycos_transf_2_GT2_Glycos_transf_2	GT2_Glycos_transf_2	GT2_Glycos_transf_2	24	23962	TRUE
GT2_Glycos_transf_2_GT2_Glycos_transf_2	GT2_Glycos_transf_2	GT2_Glycos_transf_2	24	25381	TRUE
GT2_Glycos_transf_2_GT2_Glycos_transf_2	GT2_Glycos_transf_2	GT2_Glycos_transf_2	24	27866	TRUE
GT2_Glycos_transf_2_GT2_Glycos_transf_2	GT2_Glycos_transf_2	GT2_Glycos_transf_2	24	33887	TRUE
GT2_Glycos_transf_2_GT2_Glycos_transf_2	GT2_Glycos_transf_2	GT2_Glycos_transf_2	24	34239	TRUE
GT2_Glycos_transf_2_GT2_Glycos_transf_2	GT2_Glycos_transf_2	GT2_Glycos_transf_2	24	34939	TRUE
GT2_Glycos_transf_2_GT2_Glycos_transf_2	GT2_Glycos_transf_2	GT2_Glycos_transf_2	243	239602	TRUE
GT2_Glycos_transf_2_GT2_Glycos_transf_2	GT2_Glycos_transf_2	GT2_Glycos_transf_2	25	22972	TRUE
GT2_Glycos_transf_2_GT2_Glycos_transf_2	GT2_Glycos_transf_2	GT2_Glycos_transf_2	25	22979	TRUE
GT2_Glycos_transf_2_GT2_Glycos_transf_2	GT2_Glycos_transf_2	GT2_Glycos_transf_2	25	23434	TRUE
GT2_Glycos_transf_2_GT2_Glycos_transf_2	GT2_Glycos_transf_2	GT2_Glycos_transf_2	25	24013	TRUE
GT2_Glycos_transf_2_GT2_Glycos_transf_2	GT2_Glycos_transf_2	GT2_Glycos_transf_2	25	24221	TRUE
GT2_Glycos_transf_2_GT2_Glycos_transf_2	GT2_Glycos_transf_2	GT2_Glycos_transf_2	25	26452	TRUE
GT2_Glycos_transf_2_GT2_Glycos_transf_2	GT2_Glycos_transf_2	GT2_Glycos_transf_2	25	27442	TRUE
GT2_Glycos_transf_2_GT2_Glycos_transf_2	GT2_Glycos_transf_2	GT2_Glycos_transf_2	25	28762	TRUE
GT2_Glycos_transf_2_GT2_Glycos_transf_2	GT2_Glycos_transf_2	GT2_Glycos_transf_2	25	34803	TRUE
GT2_Glycos_transf_2_GT2_Glycos_transf_2	GT2_Glycos_transf_2	GT2_Glycos_transf_2	25	36140	TRUE
GT2_Glycos_transf_2_GT2_Glycos_transf_2	GT2_Glycos_transf_2	GT2_Glycos_transf_2	25	36549	TRUE
GT2_Glycos_transf_2_GT2_Glycos_transf_2	GT2_Glycos_transf_2	GT2_Glycos_transf_2	25	40150	TRUE
GT2_Glycos_transf_2_GT2_Glycos_transf_2	GT2_Glycos_transf_2	GT2_Glycos_transf_2	26	24317	TRUE
GT2_Glycos_transf_2_GT2_Glycos_transf_2	GT2_Glycos_transf_2	GT2_Glycos_transf_2	26	25688	TRUE
GT2_Glycos_transf_2_GT2_Glycos_transf_2	GT2_Glycos_transf_2	GT2_Glycos_transf_2	26	26018	TRUE
GT2_Glycos_transf_2_GT2_Glycos_transf_2	GT2_Glycos_transf_2	GT2_Glycos_transf_2	26	27554	TRUE
GT2_Glycos_transf_2_GT2_Glycos_transf_2	GT2_Glycos_transf_2	GT2_Glycos_transf_2	26	28393	TRUE
GT2_Glycos_transf_2_GT2_Glycos_transf_2	GT2_Glycos_transf_2	GT2_Glycos_transf_2	26	33107	TRUE
GT2_Glycos_transf_2_GT2_Glycos_transf_2	GT2_Glycos_transf_2	GT2_Glycos_transf_2	26	33173	TRUE
GT2_Glycos_transf_2_GT2_Glycos_transf_2	GT2_Glycos_transf_2	GT2_Glycos_transf_2	26	34265	TRUE
GT2_Glycos_transf_2_GT2_Glycos_transf_2	GT2_Glycos_transf_2	GT2_Glycos_transf_2	26	34609	TRUE
GT2_Glycos_transf_2_GT2_Glycos_transf_2	GT2_Glycos_transf_2	GT2_Glycos_transf_2	26	37619	TRUE
GT2_Glycos_transf_2_GT2_Glycos_transf_2	GT2_Glycos_transf_2	GT2_Glycos_transf_2	26	42418	TRUE
GT2_Glycos_transf_2_GT2_Glycos_transf_2	GT2_Glycos_transf_2	GT2_Glycos_transf_2	27	24102	TRUE
GT2_Glycos_transf_2_GT2_Glycos_transf_2	GT2_Glycos_transf_2	GT2_Glycos_transf_2	27	25179	TRUE
GT2_Glycos_transf_2_GT2_Glycos_transf_2	GT2_Glycos_transf_2	GT2_Glycos_transf_2	27	27017	TRUE
GT2_Glycos_transf_2_GT2_Glycos_transf_2	GT2_Glycos_transf_2	GT2_Glycos_transf_2	27	27715	TRUE
GT2_Glycos_transf_2_GT2_Glycos_transf_2	GT2_Glycos_transf_2	GT2_Glycos_transf_2	27	28332	TRUE
GT2_Glycos_transf_2_GT2_Glycos_transf_2	GT2_Glycos_transf_2	GT2_Glycos_transf_2	27	31462	TRUE
GT2_Glycos_transf_2_GT2_Glycos_transf_2	GT2_Glycos_transf_2	GT2_Glycos_transf_2	27	35728	TRUE
GT2_Glycos_transf_2_GT2_Glycos_transf_2	GT2_Glycos_transf_2	GT2_Glycos_transf_2	27	36026	TRUE
GT2_Glycos_transf_2_GT2_Glycos_transf_2	GT2_Glycos_transf_2	GT2_Glycos_transf_2	27	36543	TRUE
GT2_Glycos_transf_2_GT2_Glycos_transf_2	GT2_Glycos_transf_2	GT2_Glycos_transf_2	27	38514	TRUE
GT2_Glycos_transf_2_GT2_Glycos_transf_2	GT2_Glycos_transf_2	GT2_Glycos_transf_2	272	364288	TRUE
GT2_Glycos_transf_2_GT2_Glycos_transf_2	GT2_Glycos_transf_2	GT2_Glycos_transf_2	28	29172	TRUE
GT2_Glycos_transf_2_GT2_Glycos_transf_2	GT2_Glycos_transf_2	GT2_Glycos_transf_2	28	29513	TRUE
GT2_Glycos_transf_2_GT2_Glycos_transf_2	GT2_Glycos_transf_2	GT2_Glycos_transf_2	28	34055	TRUE
GT2_Glycos_transf_2_GT2_Glycos_transf_2	GT2_Glycos_transf_2	GT2_Glycos_transf_2	28	35755	TRUE
GT2_Glycos_transf_2_GT2_Glycos_transf_2	GT2_Glycos_transf_2	GT2_Glycos_transf_2	28	36422	TRUE
GT2_Glycos_transf_2_GT2_Glycos_transf_2	GT2_Glycos_transf_2	GT2_Glycos_transf_2	28	37486	TRUE
GT2_Glycos_transf_2_GT2_Glycos_transf_2	GT2_Glycos_transf_2	GT2_Glycos_transf_2	28	39921	TRUE
GT2_Glycos_transf_2_GT2_Glycos_transf_2	GT2_Glycos_transf_2	GT2_Glycos_transf_2	28	45286	TRUE
GT2_Glycos_transf_2_GT2_Glycos_transf_2	GT2_Glycos_transf_2	GT2_Glycos_transf_2	286	334758	TRUE
GT2_Glycos_transf_2_GT2_Glycos_transf_2	GT2_Glycos_transf_2	GT2_Glycos_transf_2	29	25718	TRUE
GT2_Glycos_transf_2_GT2_Glycos_transf_2	GT2_Glycos_transf_2	GT2_Glycos_transf_2	29	27316	TRUE
GT2_Glycos_transf_2_GT2_Glycos_transf_2	GT2_Glycos_transf_2	GT2_Glycos_transf_2	29	29808	TRUE
GT2_Glycos_transf_2_GT2_Glycos_transf_2	GT2_Glycos_transf_2	GT2_Glycos_transf_2	29	31314	TRUE
GT2_Glycos_transf_2_GT2_Glycos_transf_2	GT2_Glycos_transf_2	GT2_Glycos_transf_2	29	37780	TRUE
GT2_Glycos_transf_2_GT2_Glycos_transf_2	GT2_Glycos_transf_2	GT2_Glycos_transf_2	29	38087	TRUE
GT2_Glycos_transf_2_GT2_Glycos_transf_2	GT2_Glycos_transf_2	GT2_Glycos_transf_2	29	38166	TRUE
GT2_Glycos_transf_2_GT2_Glycos_transf_2	GT2_Glycos_transf_2	GT2_Glycos_transf_2	29	38263	TRUE
GT2_Glycos_transf_2_GT2_Glycos_transf_2	GT2_Glycos_transf_2	GT2_Glycos_transf_2	29	38659	TRUE
GT2_Glycos_transf_2_GT2_Glycos_transf_2	GT2_Glycos_transf_2	GT2_Glycos_transf_2	29	40690	TRUE
GT2_Glycos_transf_2_GT2_Glycos_transf_2	GT2_Glycos_transf_2	GT2_Glycos_transf_2	292	390610	TRUE
GT2_Glycos_transf_2_GT2_Glycos_transf_2	GT2_Glycos_transf_2	GT2_Glycos_transf_2	3	1921	TRUE
GT2_Glycos_transf_2_GT2_Glycos_transf_2	GT2_Glycos_transf_2	GT2_Glycos_transf_2	3	2241	TRUE
GT2_Glycos_transf_2_GT2_Glycos_transf_2	GT2_Glycos_transf_2	GT2_Glycos_transf_2	3	2257	TRUE
GT2_Glycos_transf_2_GT2_Glycos_transf_2	GT2_Glycos_transf_2	GT2_Glycos_transf_2	3	2267	TRUE
GT2_Glycos_transf_2_GT2_Glycos_transf_2	GT2_Glycos_transf_2	GT2_Glycos_transf_2	3	2285	TRUE
GT2_Glycos_transf_2_GT2_Glycos_transf_2	GT2_Glycos_transf_2	GT2_Glycos_transf_2	3	2318	TRUE
GT2_Glycos_transf_2_GT2_Glycos_transf_2	GT2_Glycos_transf_2	GT2_Glycos_transf_2	3	2339	TRUE
GT2_Glycos_transf_2_GT2_Glycos_transf_2	GT2_Glycos_transf_2	GT2_Glycos_transf_2	3	2462	TRUE
GT2_Glycos_transf_2_GT2_Glycos_transf_2	GT2_Glycos_transf_2	GT2_Glycos_transf_2	3	2493	TRUE
GT2_Glycos_transf_2_GT2_Glycos_transf_2	GT2_Glycos_transf_2	GT2_Glycos_transf_2	3	2497	TRUE
GT2_Glycos_transf_2_GT2_Glycos_transf_2	GT2_Glycos_transf_2	GT2_Glycos_transf_2	3	2545	TRUE
GT2_Glycos_transf_2_GT2_Glycos_transf_2	GT2_Glycos_transf_2	GT2_Glycos_transf_2	3	2562	TRUE
GT2_Glycos_transf_2_GT2_Glycos_transf_2	GT2_Glycos_transf_2	GT2_Glycos_transf_2	3	2570	TRUE
GT2_Glycos_transf_2_GT2_Glycos_transf_2	GT2_Glycos_transf_2	GT2_Glycos_transf_2	3	2623	TRUE
GT2_Glycos_transf_2_GT2_Glycos_transf_2	GT2_Glycos_transf_2	GT2_Glycos_transf_2	3	2644	TRUE
GT2_Glycos_transf_2_GT2_Glycos_transf_2	GT2_Glycos_transf_2	GT2_Glycos_transf_2	3	2661	TRUE
GT2_Glycos_transf_2_GT2_Glycos_transf_2	GT2_Glycos_transf_2	GT2_Glycos_transf_2	3	2668	TRUE
GT2_Glycos_transf_2_GT2_Glycos_transf_2	GT2_Glycos_transf_2	GT2_Glycos_transf_2	3	2683	TRUE
GT2_Glycos_transf_2_GT2_Glycos_transf_2	GT2_Glycos_transf_2	GT2_Glycos_transf_2	3	2684	TRUE
GT2_Glycos_transf_2_GT2_Glycos_transf_2	GT2_Glycos_transf_2	GT2_Glycos_transf_2	3	2686	TRUE
GT2_Glycos_transf_2_GT2_Glycos_transf_2	GT2_Glycos_transf_2	GT2_Glycos_transf_2	3	2688	TRUE
GT2_Glycos_transf_2_GT2_Glycos_transf_2	GT2_Glycos_transf_2	GT2_Glycos_transf_2	3	2693	TRUE
GT2_Glycos_transf_2_GT2_Glycos_transf_2	GT2_Glycos_transf_2	GT2_Glycos_transf_2	3	2706	TRUE
GT2_Glycos_transf_2_GT2_Glycos_transf_2	GT2_Glycos_transf_2	GT2_Glycos_transf_2	3	2712	TRUE
GT2_Glycos_transf_2_GT2_Glycos_transf_2	GT2_Glycos_transf_2	GT2_Glycos_transf_2	3	2719	TRUE
GT2_Glycos_transf_2_GT2_Glycos_transf_2	GT2_Glycos_transf_2	GT2_Glycos_transf_2	3	2727	TRUE
GT2_Glycos_transf_2_GT2_Glycos_transf_2	GT2_Glycos_transf_2	GT2_Glycos_transf_2	3	2739	TRUE
GT2_Glycos_transf_2_GT2_Glycos_transf_2	GT2_Glycos_transf_2	GT2_Glycos_transf_2	3	2741	TRUE
GT2_Glycos_transf_2_GT2_Glycos_transf_2	GT2_Glycos_transf_2	GT2_Glycos_transf_2	3	2742	TRUE
GT2_Glycos_transf_2_GT2_Glycos_transf_2	GT2_Glycos_transf_2	GT2_Glycos_transf_2	3	2790	TRUE
GT2_Glycos_transf_2_GT2_Glycos_transf_2	GT2_Glycos_transf_2	GT2_Glycos_transf_2	3	2808	TRUE
GT2_Glycos_transf_2_GT2_Glycos_transf_2	GT2_Glycos_transf_2	GT2_Glycos_transf_2	3	2833	TRUE
GT2_Glycos_transf_2_GT2_Glycos_transf_2	GT2_Glycos_transf_2	GT2_Glycos_transf_2	3	2839	TRUE
GT2_Glycos_transf_2_GT2_Glycos_transf_2	GT2_Glycos_transf_2	GT2_Glycos_transf_2	3	2850	TRUE
GT2_Glycos_transf_2_GT2_Glycos_transf_2	GT2_Glycos_transf_2	GT2_Glycos_transf_2	3	2851	TRUE
GT2_Glycos_transf_2_GT2_Glycos_transf_2	GT2_Glycos_transf_2	GT2_Glycos_transf_2	3	2863	TRUE
GT2_Glycos_transf_2_GT2_Glycos_transf_2	GT2_Glycos_transf_2	GT2_Glycos_transf_2	3	2872	TRUE
GT2_Glycos_transf_2_GT2_Glycos_transf_2	GT2_Glycos_transf_2	GT2_Glycos_transf_2	3	2894	TRUE
GT2_Glycos_transf_2_GT2_Glycos_transf_2	GT2_Glycos_transf_2	GT2_Glycos_transf_2	3	2894	TRUE
GT2_Glycos_transf_2_GT2_Glycos_transf_2	GT2_Glycos_transf_2	GT2_Glycos_transf_2	3	2898	TRUE
GT2_Glycos_transf_2_GT2_Glycos_transf_2	GT2_Glycos_transf_2	GT2_Glycos_transf_2	3	2900	TRUE
GT2_Glycos_transf_2_GT2_Glycos_transf_2	GT2_Glycos_transf_2	GT2_Glycos_transf_2	3	2943	TRUE
GT2_Glycos_transf_2_GT2_Glycos_transf_2	GT2_Glycos_transf_2	GT2_Glycos_transf_2	3	2951	TRUE
GT2_Glycos_transf_2_GT2_Glycos_transf_2	GT2_Glycos_transf_2	GT2_Glycos_transf_2	3	2959	TRUE
GT2_Glycos_transf_2_GT2_Glycos_transf_2	GT2_Glycos_transf_2	GT2_Glycos_transf_2	3	2969	TRUE
GT2_Glycos_transf_2_GT2_Glycos_transf_2	GT2_Glycos_transf_2	GT2_Glycos_transf_2	3	2974	TRUE
GT2_Glycos_transf_2_GT2_Glycos_transf_2	GT2_Glycos_transf_2	GT2_Glycos_transf_2	3	2974	TRUE
GT2_Glycos_transf_2_GT2_Glycos_transf_2	GT2_Glycos_transf_2	GT2_Glycos_transf_2	3	2996	TRUE
GT2_Glycos_transf_2_GT2_Glycos_transf_2	GT2_Glycos_transf_2	GT2_Glycos_transf_2	3	3004	TRUE
GT2_Glycos_transf_2_GT2_Glycos_transf_2	GT2_Glycos_transf_2	GT2_Glycos_transf_2	3	3019	TRUE
GT2_Glycos_transf_2_GT2_Glycos_transf_2	GT2_Glycos_transf_2	GT2_Glycos_transf_2	3	3022	TRUE
GT2_Glycos_transf_2_GT2_Glycos_transf_2	GT2_Glycos_transf_2	GT2_Glycos_transf_2	3	3025	TRUE
GT2_Glycos_transf_2_GT2_Glycos_transf_2	GT2_Glycos_transf_2	GT2_Glycos_transf_2	3	3046	TRUE
GT2_Glycos_transf_2_GT2_Glycos_transf_2	GT2_Glycos_transf_2	GT2_Glycos_transf_2	3	3050	TRUE
GT2_Glycos_transf_2_GT2_Glycos_transf_2	GT2_Glycos_transf_2	GT2_Glycos_transf_2	3	3069	TRUE
GT2_Glycos_transf_2_GT2_Glycos_transf_2	GT2_Glycos_transf_2	GT2_Glycos_transf_2	3	3070	TRUE
GT2_Glycos_transf_2_GT2_Glycos_transf_2	GT2_Glycos_transf_2	GT2_Glycos_transf_2	3	3071	TRUE
GT2_Glycos_transf_2_GT2_Glycos_transf_2	GT2_Glycos_transf_2	GT2_Glycos_transf_2	3	3073	TRUE
GT2_Glycos_transf_2_GT2_Glycos_transf_2	GT2_Glycos_transf_2	GT2_Glycos_transf_2	3	3086	TRUE
GT2_Glycos_transf_2_GT2_Glycos_transf_2	GT2_Glycos_transf_2	GT2_Glycos_transf_2	3	3103	TRUE
GT2_Glycos_transf_2_GT2_Glycos_transf_2	GT2_Glycos_transf_2	GT2_Glycos_transf_2	3	3122	TRUE
GT2_Glycos_transf_2_GT2_Glycos_transf_2	GT2_Glycos_transf_2	GT2_Glycos_transf_2	3	3128	TRUE
GT2_Glycos_transf_2_GT2_Glycos_transf_2	GT2_Glycos_transf_2	GT2_Glycos_transf_2	3	3129	TRUE
GT2_Glycos_transf_2_GT2_Glycos_transf_2	GT2_Glycos_transf_2	GT2_Glycos_transf_2	3	3145	TRUE
GT2_Glycos_transf_2_GT2_Glycos_transf_2	GT2_Glycos_transf_2	GT2_Glycos_transf_2	3	3148	TRUE
GT2_Glycos_transf_2_GT2_Glycos_transf_2	GT2_Glycos_transf_2	GT2_Glycos_transf_2	3	3176	TRUE
GT2_Glycos_transf_2_GT2_Glycos_transf_2	GT2_Glycos_transf_2	GT2_Glycos_transf_2	3	3178	TRUE
GT2_Glycos_transf_2_GT2_Glycos_transf_2	GT2_Glycos_transf_2	GT2_Glycos_transf_2	3	3199	TRUE
GT2_Glycos_transf_2_GT2_Glycos_transf_2	GT2_Glycos_transf_2	GT2_Glycos_transf_2	3	3220	TRUE
GT2_Glycos_transf_2_GT2_Glycos_transf_2	GT2_Glycos_transf_2	GT2_Glycos_transf_2	3	3231	TRUE
GT2_Glycos_transf_2_GT2_Glycos_transf_2	GT2_Glycos_transf_2	GT2_Glycos_transf_2	3	3285	TRUE
GT2_Glycos_transf_2_GT2_Glycos_transf_2	GT2_Glycos_transf_2	GT2_Glycos_transf_2	3	3294	TRUE
GT2_Glycos_transf_2_GT2_Glycos_transf_2	GT2_Glycos_transf_2	GT2_Glycos_transf_2	3	3341	TRUE
GT2_Glycos_transf_2_GT2_Glycos_transf_2	GT2_Glycos_transf_2	GT2_Glycos_transf_2	3	3348	TRUE
GT2_Glycos_transf_2_GT2_Glycos_transf_2	GT2_Glycos_transf_2	GT2_Glycos_transf_2	3	3353	TRUE
GT2_Glycos_transf_2_GT2_Glycos_transf_2	GT2_Glycos_transf_2	GT2_Glycos_transf_2	3	3353	TRUE
GT2_Glycos_transf_2_GT2_Glycos_transf_2	GT2_Glycos_transf_2	GT2_Glycos_transf_2	3	3363	TRUE
GT2_Glycos_transf_2_GT2_Glycos_transf_2	GT2_Glycos_transf_2	GT2_Glycos_transf_2	3	3366	TRUE
GT2_Glycos_transf_2_GT2_Glycos_transf_2	GT2_Glycos_transf_2	GT2_Glycos_transf_2	3	3366	TRUE
GT2_Glycos_transf_2_GT2_Glycos_transf_2	GT2_Glycos_transf_2	GT2_Glycos_transf_2	3	3371	TRUE
GT2_Glycos_transf_2_GT2_Glycos_transf_2	GT2_Glycos_transf_2	GT2_Glycos_transf_2	3	3374	TRUE
GT2_Glycos_transf_2_GT2_Glycos_transf_2	GT2_Glycos_transf_2	GT2_Glycos_transf_2	3	3385	TRUE
GT2_Glycos_transf_2_GT2_Glycos_transf_2	GT2_Glycos_transf_2	GT2_Glycos_transf_2	3	3388	TRUE
GT2_Glycos_transf_2_GT2_Glycos_transf_2	GT2_Glycos_transf_2	GT2_Glycos_transf_2	3	3410	TRUE
GT2_Glycos_transf_2_GT2_Glycos_transf_2	GT2_Glycos_transf_2	GT2_Glycos_transf_2	3	3438	TRUE
GT2_Glycos_transf_2_GT2_Glycos_transf_2	GT2_Glycos_transf_2	GT2_Glycos_transf_2	3	3453	TRUE
GT2_Glycos_transf_2_GT2_Glycos_transf_2	GT2_Glycos_transf_2	GT2_Glycos_transf_2	3	3463	TRUE
GT2_Glycos_transf_2_GT2_Glycos_transf_2	GT2_Glycos_transf_2	GT2_Glycos_transf_2	3	3504	TRUE
GT2_Glycos_transf_2_GT2_Glycos_transf_2	GT2_Glycos_transf_2	GT2_Glycos_transf_2	3	3524	TRUE
GT2_Glycos_transf_2_GT2_Glycos_transf_2	GT2_Glycos_transf_2	GT2_Glycos_transf_2	3	3580	TRUE
GT2_Glycos_transf_2_GT2_Glycos_transf_2	GT2_Glycos_transf_2	GT2_Glycos_transf_2	3	3586	TRUE
GT2_Glycos_transf_2_GT2_Glycos_transf_2	GT2_Glycos_transf_2	GT2_Glycos_transf_2	3	3635	TRUE
GT2_Glycos_transf_2_GT2_Glycos_transf_2	GT2_Glycos_transf_2	GT2_Glycos_transf_2	3	3645	TRUE
GT2_Glycos_transf_2_GT2_Glycos_transf_2	GT2_Glycos_transf_2	GT2_Glycos_transf_2	3	3675	TRUE
GT2_Glycos_transf_2_GT2_Glycos_transf_2	GT2_Glycos_transf_2	GT2_Glycos_transf_2	3	3719	TRUE
GT2_Glycos_transf_2_GT2_Glycos_transf_2	GT2_Glycos_transf_2	GT2_Glycos_transf_2	3	3791	TRUE
GT2_Glycos_transf_2_GT2_Glycos_transf_2	GT2_Glycos_transf_2	GT2_Glycos_transf_2	3	3822	TRUE
GT2_Glycos_transf_2_GT2_Glycos_transf_2	GT2_Glycos_transf_2	GT2_Glycos_transf_2	3	3879	TRUE
GT2_Glycos_transf_2_GT2_Glycos_transf_2	GT2_Glycos_transf_2	GT2_Glycos_transf_2	3	3931	TRUE
GT2_Glycos_transf_2_GT2_Glycos_transf_2	GT2_Glycos_transf_2	GT2_Glycos_transf_2	3	4050	TRUE
GT2_Glycos_transf_2_GT2_Glycos_transf_2	GT2_Glycos_transf_2	GT2_Glycos_transf_2	3	4215	TRUE
GT2_Glycos_transf_2_GT2_Glycos_transf_2	GT2_Glycos_transf_2	GT2_Glycos_transf_2	3	4232	TRUE
GT2_Glycos_transf_2_GT2_Glycos_transf_2	GT2_Glycos_transf_2	GT2_Glycos_transf_2	3	4283	TRUE
GT2_Glycos_transf_2_GT2_Glycos_transf_2	GT2_Glycos_transf_2	GT2_Glycos_transf_2	3	4297	TRUE
GT2_Glycos_transf_2_GT2_Glycos_transf_2	GT2_Glycos_transf_2	GT2_Glycos_transf_2	3	4361	TRUE
GT2_Glycos_transf_2_GT2_Glycos_transf_2	GT2_Glycos_transf_2	GT2_Glycos_transf_2	3	4528	TRUE
GT2_Glycos_transf_2_GT2_Glycos_transf_2	GT2_Glycos_transf_2	GT2_Glycos_transf_2	3	4602	TRUE
GT2_Glycos_transf_2_GT2_Glycos_transf_2	GT2_Glycos_transf_2	GT2_Glycos_transf_2	3	4611	TRUE
GT2_Glycos_transf_2_GT2_Glycos_transf_2	GT2_Glycos_transf_2	GT2_Glycos_transf_2	3	4617	TRUE
GT2_Glycos_transf_2_GT2_Glycos_transf_2	GT2_Glycos_transf_2	GT2_Glycos_transf_2	3	4623	TRUE
GT2_Glycos_transf_2_GT2_Glycos_transf_2	GT2_Glycos_transf_2	GT2_Glycos_transf_2	3	4623	TRUE
GT2_Glycos_transf_2_GT2_Glycos_transf_2	GT2_Glycos_transf_2	GT2_Glycos_transf_2	3	4673	TRUE
GT2_Glycos_transf_2_GT2_Glycos_transf_2	GT2_Glycos_transf_2	GT2_Glycos_transf_2	3	4747	TRUE
GT2_Glycos_transf_2_GT2_Glycos_transf_2	GT2_Glycos_transf_2	GT2_Glycos_transf_2	3	5136	TRUE
GT2_Glycos_transf_2_GT2_Glycos_transf_2	GT2_Glycos_transf_2	GT2_Glycos_transf_2	3	5139	TRUE
GT2_Glycos_transf_2_GT2_Glycos_transf_2	GT2_Glycos_transf_2	GT2_Glycos_transf_2	3	5183	TRUE
GT2_Glycos_transf_2_GT2_Glycos_transf_2	GT2_Glycos_transf_2	GT2_Glycos_transf_2	3	5215	TRUE
GT2_Glycos_transf_2_GT2_Glycos_transf_2	GT2_Glycos_transf_2	GT2_Glycos_transf_2	3	5294	TRUE
GT2_Glycos_transf_2_GT2_Glycos_transf_2	GT2_Glycos_transf_2	GT2_Glycos_transf_2	3	5337	TRUE
GT2_Glycos_transf_2_GT2_Glycos_transf_2	GT2_Glycos_transf_2	GT2_Glycos_transf_2	3	5521	TRUE
GT2_Glycos_transf_2_GT2_Glycos_transf_2	GT2_Glycos_transf_2	GT2_Glycos_transf_2	3	5535	TRUE
GT2_Glycos_transf_2_GT2_Glycos_transf_2	GT2_Glycos_transf_2	GT2_Glycos_transf_2	3	5573	TRUE
GT2_Glycos_transf_2_GT2_Glycos_transf_2	GT2_Glycos_transf_2	GT2_Glycos_transf_2	3	5697	TRUE
GT2_Glycos_transf_2_GT2_Glycos_transf_2	GT2_Glycos_transf_2	GT2_Glycos_transf_2	3	5716	TRUE
GT2_Glycos_transf_2_GT2_Glycos_transf_2	GT2_Glycos_transf_2	GT2_Glycos_transf_2	3	5811	TRUE
GT2_Glycos_transf_2_GT2_Glycos_transf_2	GT2_Glycos_transf_2	GT2_Glycos_transf_2	3	5883	TRUE
GT2_Glycos_transf_2_GT2_Glycos_transf_2	GT2_Glycos_transf_2	GT2_Glycos_transf_2	3	6289	TRUE
GT2_Glycos_transf_2_GT2_Glycos_transf_2	GT2_Glycos_transf_2	GT2_Glycos_transf_2	3	6408	TRUE
GT2_Glycos_transf_2_GT2_Glycos_transf_2	GT2_Glycos_transf_2	GT2_Glycos_transf_2	30	30054	TRUE
GT2_Glycos_transf_2_GT2_Glycos_transf_2	GT2_Glycos_transf_2	GT2_Glycos_transf_2	30	30310	TRUE
GT2_Glycos_transf_2_GT2_Glycos_transf_2	GT2_Glycos_transf_2	GT2_Glycos_transf_2	30	31081	TRUE
GT2_Glycos_transf_2_GT2_Glycos_transf_2	GT2_Glycos_transf_2	GT2_Glycos_transf_2	30	32934	TRUE
GT2_Glycos_transf_2_GT2_Glycos_transf_2	GT2_Glycos_transf_2	GT2_Glycos_transf_2	30	34313	TRUE
GT2_Glycos_transf_2_GT2_Glycos_transf_2	GT2_Glycos_transf_2	GT2_Glycos_transf_2	30	36652	TRUE
GT2_Glycos_transf_2_GT2_Glycos_transf_2	GT2_Glycos_transf_2	GT2_Glycos_transf_2	30	46187	TRUE
GT2_Glycos_transf_2_GT2_Glycos_transf_2	GT2_Glycos_transf_2	GT2_Glycos_transf_2	31	29519	TRUE
GT2_Glycos_transf_2_GT2_Glycos_transf_2	GT2_Glycos_transf_2	GT2_Glycos_transf_2	31	31678	TRUE
GT2_Glycos_transf_2_GT2_Glycos_transf_2	GT2_Glycos_transf_2	GT2_Glycos_transf_2	31	32026	TRUE
GT2_Glycos_transf_2_GT2_Glycos_transf_2	GT2_Glycos_transf_2	GT2_Glycos_transf_2	31	32440	TRUE
GT2_Glycos_transf_2_GT2_Glycos_transf_2	GT2_Glycos_transf_2	GT2_Glycos_transf_2	31	33866	TRUE
GT2_Glycos_transf_2_GT2_Glycos_transf_2	GT2_Glycos_transf_2	GT2_Glycos_transf_2	31	36907	TRUE
GT2_Glycos_transf_2_GT2_Glycos_transf_2	GT2_Glycos_transf_2	GT2_Glycos_transf_2	31	37755	TRUE
GT2_Glycos_transf_2_GT2_Glycos_transf_2	GT2_Glycos_transf_2	GT2_Glycos_transf_2	31	42589	TRUE
GT2_Glycos_transf_2_GT2_Glycos_transf_2	GT2_Glycos_transf_2	GT2_Glycos_transf_2	31	47388	TRUE
GT2_Glycos_transf_2_GT2_Glycos_transf_2	GT2_Glycos_transf_2	GT2_Glycos_transf_2	31	48455	TRUE
GT2_Glycos_transf_2_GT2_Glycos_transf_2	GT2_Glycos_transf_2	GT2_Glycos_transf_2	32	41910	TRUE
GT2_Glycos_transf_2_GT2_Glycos_transf_2	GT2_Glycos_transf_2	GT2_Glycos_transf_2	32	42025	TRUE
GT2_Glycos_transf_2_GT2_Glycos_transf_2	GT2_Glycos_transf_2	GT2_Glycos_transf_2	32	43643	TRUE
GT2_Glycos_transf_2_GT2_Glycos_transf_2	GT2_Glycos_transf_2	GT2_Glycos_transf_2	32	45926	TRUE
GT2_Glycos_transf_2_GT2_Glycos_transf_2	GT2_Glycos_transf_2	GT2_Glycos_transf_2	32	49656	TRUE
GT2_Glycos_transf_2_GT2_Glycos_transf_2	GT2_Glycos_transf_2	GT2_Glycos_transf_2	33	31247	TRUE
GT2_Glycos_transf_2_GT2_Glycos_transf_2	GT2_Glycos_transf_2	GT2_Glycos_transf_2	33	31777	TRUE
GT2_Glycos_transf_2_GT2_Glycos_transf_2	GT2_Glycos_transf_2	GT2_Glycos_transf_2	33	33420	TRUE
GT2_Glycos_transf_2_GT2_Glycos_transf_2	GT2_Glycos_transf_2	GT2_Glycos_transf_2	33	35131	TRUE
GT2_Glycos_transf_2_GT2_Glycos_transf_2	GT2_Glycos_transf_2	GT2_Glycos_transf_2	33	36492	TRUE
GT2_Glycos_transf_2_GT2_Glycos_transf_2	GT2_Glycos_transf_2	GT2_Glycos_transf_2	33	40884	TRUE
GT2_Glycos_transf_2_GT2_Glycos_transf_2	GT2_Glycos_transf_2	GT2_Glycos_transf_2	33	42739	TRUE
GT2_Glycos_transf_2_GT2_Glycos_transf_2	GT2_Glycos_transf_2	GT2_Glycos_transf_2	33	43786	TRUE
GT2_Glycos_transf_2_GT2_Glycos_transf_2	GT2_Glycos_transf_2	GT2_Glycos_transf_2	33	43977	TRUE
GT2_Glycos_transf_2_GT2_Glycos_transf_2	GT2_Glycos_transf_2	GT2_Glycos_transf_2	33	43988	TRUE
GT2_Glycos_transf_2_GT2_Glycos_transf_2	GT2_Glycos_transf_2	GT2_Glycos_transf_2	33	51323	TRUE
GT2_Glycos_transf_2_GT2_Glycos_transf_2	GT2_Glycos_transf_2	GT2_Glycos_transf_2	34	32223	TRUE
GT2_Glycos_transf_2_GT2_Glycos_transf_2	GT2_Glycos_transf_2	GT2_Glycos_transf_2	34	37567	TRUE
GT2_Glycos_transf_2_GT2_Glycos_transf_2	GT2_Glycos_transf_2	GT2_Glycos_transf_2	34	41987	TRUE
GT2_Glycos_transf_2_GT2_Glycos_transf_2	GT2_Glycos_transf_2	GT2_Glycos_transf_2	34	43613	TRUE
GT2_Glycos_transf_2_GT2_Glycos_transf_2	GT2_Glycos_transf_2	GT2_Glycos_transf_2	34	45440	TRUE
GT2_Glycos_transf_2_GT2_Glycos_transf_2	GT2_Glycos_transf_2	GT2_Glycos_transf_2	34	45930	TRUE
GT2_Glycos_transf_2_GT2_Glycos_transf_2	GT2_Glycos_transf_2	GT2_Glycos_transf_2	34	52524	TRUE
GT2_Glycos_transf_2_GT2_Glycos_transf_2	GT2_Glycos_transf_2	GT2_Glycos_transf_2	35	33400	TRUE
GT2_Glycos_transf_2_GT2_Glycos_transf_2	GT2_Glycos_transf_2	GT2_Glycos_transf_2	35	35230	TRUE
GT2_Glycos_transf_2_GT2_Glycos_transf_2	GT2_Glycos_transf_2	GT2_Glycos_transf_2	35	36888	TRUE
GT2_Glycos_transf_2_GT2_Glycos_transf_2	GT2_Glycos_transf_2	GT2_Glycos_transf_2	35	37811	TRUE
GT2_Glycos_transf_2_GT2_Glycos_transf_2	GT2_Glycos_transf_2	GT2_Glycos_transf_2	35	38708	TRUE
GT2_Glycos_transf_2_GT2_Glycos_transf_2	GT2_Glycos_transf_2	GT2_Glycos_transf_2	35	40938	TRUE
GT2_Glycos_transf_2_GT2_Glycos_transf_2	GT2_Glycos_transf_2	GT2_Glycos_transf_2	35	41834	TRUE
GT2_Glycos_transf_2_GT2_Glycos_transf_2	GT2_Glycos_transf_2	GT2_Glycos_transf_2	35	46206	TRUE
GT2_Glycos_transf_2_GT2_Glycos_transf_2	GT2_Glycos_transf_2	GT2_Glycos_transf_2	36	35382	TRUE
GT2_Glycos_transf_2_GT2_Glycos_transf_2	GT2_Glycos_transf_2	GT2_Glycos_transf_2	36	37470	TRUE
GT2_Glycos_transf_2_GT2_Glycos_transf_2	GT2_Glycos_transf_2	GT2_Glycos_transf_2	36	42237	TRUE
GT2_Glycos_transf_2_GT2_Glycos_transf_2	GT2_Glycos_transf_2	GT2_Glycos_transf_2	36	46118	TRUE
GT2_Glycos_transf_2_GT2_Glycos_transf_2	GT2_Glycos_transf_2	GT2_Glycos_transf_2	36	47799	TRUE
GT2_Glycos_transf_2_GT2_Glycos_transf_2	GT2_Glycos_transf_2	GT2_Glycos_transf_2	36	48148	TRUE
GT2_Glycos_transf_2_GT2_Glycos_transf_2	GT2_Glycos_transf_2	GT2_Glycos_transf_2	37	36953	TRUE
GT2_Glycos_transf_2_GT2_Glycos_transf_2	GT2_Glycos_transf_2	GT2_Glycos_transf_2	37	40668	TRUE
GT2_Glycos_transf_2_GT2_Glycos_transf_2	GT2_Glycos_transf_2	GT2_Glycos_transf_2	38	37897	TRUE
GT2_Glycos_transf_2_GT2_Glycos_transf_2	GT2_Glycos_transf_2	GT2_Glycos_transf_2	38	42596	TRUE
GT2_Glycos_transf_2_GT2_Glycos_transf_2	GT2_Glycos_transf_2	GT2_Glycos_transf_2	39	38748	TRUE
GT2_Glycos_transf_2_GT2_Glycos_transf_2	GT2_Glycos_transf_2	GT2_Glycos_transf_2	39	38966	TRUE
GT2_Glycos_transf_2_GT2_Glycos_transf_2	GT2_Glycos_transf_2	GT2_Glycos_transf_2	39	49174	TRUE
GT2_Glycos_transf_2_GT2_Glycos_transf_2	GT2_Glycos_transf_2	GT2_Glycos_transf_2	39	52537	TRUE
GT2_Glycos_transf_2_GT2_Glycos_transf_2	GT2_Glycos_transf_2	GT2_Glycos_transf_2	4	2000	TRUE
GT2_Glycos_transf_2_GT2_Glycos_transf_2	GT2_Glycos_transf_2	GT2_Glycos_transf_2	4	2550	TRUE
GT2_Glycos_transf_2_GT2_Glycos_transf_2	GT2_Glycos_transf_2	GT2_Glycos_transf_2	4	2766	TRUE
GT2_Glycos_transf_2_GT2_Glycos_transf_2	GT2_Glycos_transf_2	GT2_Glycos_transf_2	4	2851	TRUE
GT2_Glycos_transf_2_GT2_Glycos_transf_2	GT2_Glycos_transf_2	GT2_Glycos_transf_2	4	2949	TRUE
GT2_Glycos_transf_2_GT2_Glycos_transf_2	GT2_Glycos_transf_2	GT2_Glycos_transf_2	4	2963	TRUE
GT2_Glycos_transf_2_GT2_Glycos_transf_2	GT2_Glycos_transf_2	GT2_Glycos_transf_2	4	3040	TRUE
GT2_Glycos_transf_2_GT2_Glycos_transf_2	GT2_Glycos_transf_2	GT2_Glycos_transf_2	4	3176	TRUE
GT2_Glycos_transf_2_GT2_Glycos_transf_2	GT2_Glycos_transf_2	GT2_Glycos_transf_2	4	3212	TRUE
GT2_Glycos_transf_2_GT2_Glycos_transf_2	GT2_Glycos_transf_2	GT2_Glycos_transf_2	4	3286	TRUE
GT2_Glycos_transf_2_GT2_Glycos_transf_2	GT2_Glycos_transf_2	GT2_Glycos_transf_2	4	3454	TRUE
GT2_Glycos_transf_2_GT2_Glycos_transf_2	GT2_Glycos_transf_2	GT2_Glycos_transf_2	4	3460	TRUE
GT2_Glycos_transf_2_GT2_Glycos_transf_2	GT2_Glycos_transf_2	GT2_Glycos_transf_2	4	3468	TRUE
GT2_Glycos_transf_2_GT2_Glycos_transf_2	GT2_Glycos_transf_2	GT2_Glycos_transf_2	4	3502	TRUE
GT2_Glycos_transf_2_GT2_Glycos_transf_2	GT2_Glycos_transf_2	GT2_Glycos_transf_2	4	3506	TRUE
GT2_Glycos_transf_2_GT2_Glycos_transf_2	GT2_Glycos_transf_2	GT2_Glycos_transf_2	4	3520	TRUE
GT2_Glycos_transf_2_GT2_Glycos_transf_2	GT2_Glycos_transf_2	GT2_Glycos_transf_2	4	3540	TRUE
GT2_Glycos_transf_2_GT2_Glycos_transf_2	GT2_Glycos_transf_2	GT2_Glycos_transf_2	4	3550	TRUE
GT2_Glycos_transf_2_GT2_Glycos_transf_2	GT2_Glycos_transf_2	GT2_Glycos_transf_2	4	3574	TRUE
GT2_Glycos_transf_2_GT2_Glycos_transf_2	GT2_Glycos_transf_2	GT2_Glycos_transf_2	4	3581	TRUE
GT2_Glycos_transf_2_GT2_Glycos_transf_2	GT2_Glycos_transf_2	GT2_Glycos_transf_2	4	3585	TRUE
GT2_Glycos_transf_2_GT2_Glycos_transf_2	GT2_Glycos_transf_2	GT2_Glycos_transf_2	4	3591	TRUE
GT2_Glycos_transf_2_GT2_Glycos_transf_2	GT2_Glycos_transf_2	GT2_Glycos_transf_2	4	3603	TRUE
GT2_Glycos_transf_2_GT2_Glycos_transf_2	GT2_Glycos_transf_2	GT2_Glycos_transf_2	4	3603	TRUE
GT2_Glycos_transf_2_GT2_Glycos_transf_2	GT2_Glycos_transf_2	GT2_Glycos_transf_2	4	3648	TRUE
GT2_Glycos_transf_2_GT2_Glycos_transf_2	GT2_Glycos_transf_2	GT2_Glycos_transf_2	4	3665	TRUE
GT2_Glycos_transf_2_GT2_Glycos_transf_2	GT2_Glycos_transf_2	GT2_Glycos_transf_2	4	3666	TRUE
GT2_Glycos_transf_2_GT2_Glycos_transf_2	GT2_Glycos_transf_2	GT2_Glycos_transf_2	4	3667	TRUE
GT2_Glycos_transf_2_GT2_Glycos_transf_2	GT2_Glycos_transf_2	GT2_Glycos_transf_2	4	3682	TRUE
GT2_Glycos_transf_2_GT2_Glycos_transf_2	GT2_Glycos_transf_2	GT2_Glycos_transf_2	4	3781	TRUE
GT2_Glycos_transf_2_GT2_Glycos_transf_2	GT2_Glycos_transf_2	GT2_Glycos_transf_2	4	3782	TRUE
GT2_Glycos_transf_2_GT2_Glycos_transf_2	GT2_Glycos_transf_2	GT2_Glycos_transf_2	4	3788	TRUE
GT2_Glycos_transf_2_GT2_Glycos_transf_2	GT2_Glycos_transf_2	GT2_Glycos_transf_2	4	3798	TRUE
GT2_Glycos_transf_2_GT2_Glycos_transf_2	GT2_Glycos_transf_2	GT2_Glycos_transf_2	4	3848	TRUE
GT2_Glycos_transf_2_GT2_Glycos_transf_2	GT2_Glycos_transf_2	GT2_Glycos_transf_2	4	3864	TRUE
GT2_Glycos_transf_2_GT2_Glycos_transf_2	GT2_Glycos_transf_2	GT2_Glycos_transf_2	4	3877	TRUE
GT2_Glycos_transf_2_GT2_Glycos_transf_2	GT2_Glycos_transf_2	GT2_Glycos_transf_2	4	3881	TRUE
GT2_Glycos_transf_2_GT2_Glycos_transf_2	GT2_Glycos_transf_2	GT2_Glycos_transf_2	4	3959	TRUE
GT2_Glycos_transf_2_GT2_Glycos_transf_2	GT2_Glycos_transf_2	GT2_Glycos_transf_2	4	3986	TRUE
GT2_Glycos_transf_2_GT2_Glycos_transf_2	GT2_Glycos_transf_2	GT2_Glycos_transf_2	4	3998	TRUE
GT2_Glycos_transf_2_GT2_Glycos_transf_2	GT2_Glycos_transf_2	GT2_Glycos_transf_2	4	4008	TRUE
GT2_Glycos_transf_2_GT2_Glycos_transf_2	GT2_Glycos_transf_2	GT2_Glycos_transf_2	4	4010	TRUE
GT2_Glycos_transf_2_GT2_Glycos_transf_2	GT2_Glycos_transf_2	GT2_Glycos_transf_2	4	4031	TRUE
GT2_Glycos_transf_2_GT2_Glycos_transf_2	GT2_Glycos_transf_2	GT2_Glycos_transf_2	4	4038	TRUE
GT2_Glycos_transf_2_GT2_Glycos_transf_2	GT2_Glycos_transf_2	GT2_Glycos_transf_2	4	4046	TRUE
GT2_Glycos_transf_2_GT2_Glycos_transf_2	GT2_Glycos_transf_2	GT2_Glycos_transf_2	4	4047	TRUE
GT2_Glycos_transf_2_GT2_Glycos_transf_2	GT2_Glycos_transf_2	GT2_Glycos_transf_2	4	4056	TRUE
GT2_Glycos_transf_2_GT2_Glycos_transf_2	GT2_Glycos_transf_2	GT2_Glycos_transf_2	4	4066	TRUE
GT2_Glycos_transf_2_GT2_Glycos_transf_2	GT2_Glycos_transf_2	GT2_Glycos_transf_2	4	4075	TRUE
GT2_Glycos_transf_2_GT2_Glycos_transf_2	GT2_Glycos_transf_2	GT2_Glycos_transf_2	4	4080	TRUE
GT2_Glycos_transf_2_GT2_Glycos_transf_2	GT2_Glycos_transf_2	GT2_Glycos_transf_2	4	4141	TRUE
GT2_Glycos_transf_2_GT2_Glycos_transf_2	GT2_Glycos_transf_2	GT2_Glycos_transf_2	4	4211	TRUE
GT2_Glycos_transf_2_GT2_Glycos_transf_2	GT2_Glycos_transf_2	GT2_Glycos_transf_2	4	4221	TRUE
GT2_Glycos_transf_2_GT2_Glycos_transf_2	GT2_Glycos_transf_2	GT2_Glycos_transf_2	4	4221	TRUE
GT2_Glycos_transf_2_GT2_Glycos_transf_2	GT2_Glycos_transf_2	GT2_Glycos_transf_2	4	4243	TRUE
GT2_Glycos_transf_2_GT2_Glycos_transf_2	GT2_Glycos_transf_2	GT2_Glycos_transf_2	4	4245	TRUE
GT2_Glycos_transf_2_GT2_Glycos_transf_2	GT2_Glycos_transf_2	GT2_Glycos_transf_2	4	4274	TRUE
GT2_Glycos_transf_2_GT2_Glycos_transf_2	GT2_Glycos_transf_2	GT2_Glycos_transf_2	4	4307	TRUE
GT2_Glycos_transf_2_GT2_Glycos_transf_2	GT2_Glycos_transf_2	GT2_Glycos_transf_2	4	4323	TRUE
GT2_Glycos_transf_2_GT2_Glycos_transf_2	GT2_Glycos_transf_2	GT2_Glycos_transf_2	4	4336	TRUE
GT2_Glycos_transf_2_GT2_Glycos_transf_2	GT2_Glycos_transf_2	GT2_Glycos_transf_2	4	4340	TRUE
GT2_Glycos_transf_2_GT2_Glycos_transf_2	GT2_Glycos_transf_2	GT2_Glycos_transf_2	4	4367	TRUE
GT2_Glycos_transf_2_GT2_Glycos_transf_2	GT2_Glycos_transf_2	GT2_Glycos_transf_2	4	4403	TRUE
GT2_Glycos_transf_2_GT2_Glycos_transf_2	GT2_Glycos_transf_2	GT2_Glycos_transf_2	4	4406	TRUE
GT2_Glycos_transf_2_GT2_Glycos_transf_2	GT2_Glycos_transf_2	GT2_Glycos_transf_2	4	4461	TRUE
GT2_Glycos_transf_2_GT2_Glycos_transf_2	GT2_Glycos_transf_2	GT2_Glycos_transf_2	4	4462	TRUE
GT2_Glycos_transf_2_GT2_Glycos_transf_2	GT2_Glycos_transf_2	GT2_Glycos_transf_2	4	4485	TRUE
GT2_Glycos_transf_2_GT2_Glycos_transf_2	GT2_Glycos_transf_2	GT2_Glycos_transf_2	4	4505	TRUE
GT2_Glycos_transf_2_GT2_Glycos_transf_2	GT2_Glycos_transf_2	GT2_Glycos_transf_2	4	4511	TRUE
GT2_Glycos_transf_2_GT2_Glycos_transf_2	GT2_Glycos_transf_2	GT2_Glycos_transf_2	4	4531	TRUE
GT2_Glycos_transf_2_GT2_Glycos_transf_2	GT2_Glycos_transf_2	GT2_Glycos_transf_2	4	4616	TRUE
GT2_Glycos_transf_2_GT2_Glycos_transf_2	GT2_Glycos_transf_2	GT2_Glycos_transf_2	4	4650	TRUE
GT2_Glycos_transf_2_GT2_Glycos_transf_2	GT2_Glycos_transf_2	GT2_Glycos_transf_2	4	4661	TRUE
GT2_Glycos_transf_2_GT2_Glycos_transf_2	GT2_Glycos_transf_2	GT2_Glycos_transf_2	4	4782	TRUE
GT2_Glycos_transf_2_GT2_Glycos_transf_2	GT2_Glycos_transf_2	GT2_Glycos_transf_2	4	4970	TRUE
GT2_Glycos_transf_2_GT2_Glycos_transf_2	GT2_Glycos_transf_2	GT2_Glycos_transf_2	4	4992	TRUE
GT2_Glycos_transf_2_GT2_Glycos_transf_2	GT2_Glycos_transf_2	GT2_Glycos_transf_2	4	5094	TRUE
GT2_Glycos_transf_2_GT2_Glycos_transf_2	GT2_Glycos_transf_2	GT2_Glycos_transf_2	4	5152	TRUE
GT2_Glycos_transf_2_GT2_Glycos_transf_2	GT2_Glycos_transf_2	GT2_Glycos_transf_2	4	5229	TRUE
GT2_Glycos_transf_2_GT2_Glycos_transf_2	GT2_Glycos_transf_2	GT2_Glycos_transf_2	4	5362	TRUE
GT2_Glycos_transf_2_GT2_Glycos_transf_2	GT2_Glycos_transf_2	GT2_Glycos_transf_2	4	5426	TRUE
GT2_Glycos_transf_2_GT2_Glycos_transf_2	GT2_Glycos_transf_2	GT2_Glycos_transf_2	4	5480	TRUE
GT2_Glycos_transf_2_GT2_Glycos_transf_2	GT2_Glycos_transf_2	GT2_Glycos_transf_2	4	5524	TRUE
GT2_Glycos_transf_2_GT2_Glycos_transf_2	GT2_Glycos_transf_2	GT2_Glycos_transf_2	4	5835	TRUE
GT2_Glycos_transf_2_GT2_Glycos_transf_2	GT2_Glycos_transf_2	GT2_Glycos_transf_2	4	5987	TRUE
GT2_Glycos_transf_2_GT2_Glycos_transf_2	GT2_Glycos_transf_2	GT2_Glycos_transf_2	4	5994	TRUE
GT2_Glycos_transf_2_GT2_Glycos_transf_2	GT2_Glycos_transf_2	GT2_Glycos_transf_2	4	6028	TRUE
GT2_Glycos_transf_2_GT2_Glycos_transf_2	GT2_Glycos_transf_2	GT2_Glycos_transf_2	4	6141	TRUE
GT2_Glycos_transf_2_GT2_Glycos_transf_2	GT2_Glycos_transf_2	GT2_Glycos_transf_2	4	6451	TRUE
GT2_Glycos_transf_2_GT2_Glycos_transf_2	GT2_Glycos_transf_2	GT2_Glycos_transf_2	4	6483	TRUE
GT2_Glycos_transf_2_GT2_Glycos_transf_2	GT2_Glycos_transf_2	GT2_Glycos_transf_2	4	6617	TRUE
GT2_Glycos_transf_2_GT2_Glycos_transf_2	GT2_Glycos_transf_2	GT2_Glycos_transf_2	4	6734	TRUE
GT2_Glycos_transf_2_GT2_Glycos_transf_2	GT2_Glycos_transf_2	GT2_Glycos_transf_2	4	6764	TRUE
GT2_Glycos_transf_2_GT2_Glycos_transf_2	GT2_Glycos_transf_2	GT2_Glycos_transf_2	4	6918	TRUE
GT2_Glycos_transf_2_GT2_Glycos_transf_2	GT2_Glycos_transf_2	GT2_Glycos_transf_2	4	6946	TRUE
GT2_Glycos_transf_2_GT2_Glycos_transf_2	GT2_Glycos_transf_2	GT2_Glycos_transf_2	4	7231	TRUE
GT2_Glycos_transf_2_GT2_Glycos_transf_2	GT2_Glycos_transf_2	GT2_Glycos_transf_2	4	7267	TRUE
GT2_Glycos_transf_2_GT2_Glycos_transf_2	GT2_Glycos_transf_2	GT2_Glycos_transf_2	4	7712	TRUE
GT2_Glycos_transf_2_GT2_Glycos_transf_2	GT2_Glycos_transf_2	GT2_Glycos_transf_2	40	40023	TRUE
GT2_Glycos_transf_2_GT2_Glycos_transf_2	GT2_Glycos_transf_2	GT2_Glycos_transf_2	40	42230	TRUE
GT2_Glycos_transf_2_GT2_Glycos_transf_2	GT2_Glycos_transf_2	GT2_Glycos_transf_2	40	46268	TRUE
GT2_Glycos_transf_2_GT2_Glycos_transf_2	GT2_Glycos_transf_2	GT2_Glycos_transf_2	40	48138	TRUE
GT2_Glycos_transf_2_GT2_Glycos_transf_2	GT2_Glycos_transf_2	GT2_Glycos_transf_2	41	44385	TRUE
GT2_Glycos_transf_2_GT2_Glycos_transf_2	GT2_Glycos_transf_2	GT2_Glycos_transf_2	41	49225	TRUE
GT2_Glycos_transf_2_GT2_Glycos_transf_2	GT2_Glycos_transf_2	GT2_Glycos_transf_2	41	49699	TRUE
GT2_Glycos_transf_2_GT2_Glycos_transf_2	GT2_Glycos_transf_2	GT2_Glycos_transf_2	41	54755	TRUE
GT2_Glycos_transf_2_GT2_Glycos_transf_2	GT2_Glycos_transf_2	GT2_Glycos_transf_2	42	42329	TRUE
GT2_Glycos_transf_2_GT2_Glycos_transf_2	GT2_Glycos_transf_2	GT2_Glycos_transf_2	42	42798	TRUE
GT2_Glycos_transf_2_GT2_Glycos_transf_2	GT2_Glycos_transf_2	GT2_Glycos_transf_2	42	44642	TRUE
GT2_Glycos_transf_2_GT2_Glycos_transf_2	GT2_Glycos_transf_2	GT2_Glycos_transf_2	42	44942	TRUE
GT2_Glycos_transf_2_GT2_Glycos_transf_2	GT2_Glycos_transf_2	GT2_Glycos_transf_2	42	50018	TRUE
GT2_Glycos_transf_2_GT2_Glycos_transf_2	GT2_Glycos_transf_2	GT2_Glycos_transf_2	42	51326	TRUE
GT2_Glycos_transf_2_GT2_Glycos_transf_2	GT2_Glycos_transf_2	GT2_Glycos_transf_2	43	43273	TRUE
GT2_Glycos_transf_2_GT2_Glycos_transf_2	GT2_Glycos_transf_2	GT2_Glycos_transf_2	43	43339	TRUE
GT2_Glycos_transf_2_GT2_Glycos_transf_2	GT2_Glycos_transf_2	GT2_Glycos_transf_2	43	51089	TRUE
GT2_Glycos_transf_2_GT2_Glycos_transf_2	GT2_Glycos_transf_2	GT2_Glycos_transf_2	43	51105	TRUE
GT2_Glycos_transf_2_GT2_Glycos_transf_2	GT2_Glycos_transf_2	GT2_Glycos_transf_2	44	37617	TRUE
GT2_Glycos_transf_2_GT2_Glycos_transf_2	GT2_Glycos_transf_2	GT2_Glycos_transf_2	44	38712	TRUE
GT2_Glycos_transf_2_GT2_Glycos_transf_2	GT2_Glycos_transf_2	GT2_Glycos_transf_2	44	44342	TRUE
GT2_Glycos_transf_2_GT2_Glycos_transf_2	GT2_Glycos_transf_2	GT2_Glycos_transf_2	44	52176	TRUE
GT2_Glycos_transf_2_GT2_Glycos_transf_2	GT2_Glycos_transf_2	GT2_Glycos_transf_2	44	56593	TRUE
GT2_Glycos_transf_2_GT2_Glycos_transf_2	GT2_Glycos_transf_2	GT2_Glycos_transf_2	44	59170	TRUE
GT2_Glycos_transf_2_GT2_Glycos_transf_2	GT2_Glycos_transf_2	GT2_Glycos_transf_2	45	45399	TRUE
GT2_Glycos_transf_2_GT2_Glycos_transf_2	GT2_Glycos_transf_2	GT2_Glycos_transf_2	45	51972	TRUE
GT2_Glycos_transf_2_GT2_Glycos_transf_2	GT2_Glycos_transf_2	GT2_Glycos_transf_2	45	58056	TRUE
GT2_Glycos_transf_2_GT2_Glycos_transf_2	GT2_Glycos_transf_2	GT2_Glycos_transf_2	46	47284	TRUE
GT2_Glycos_transf_2_GT2_Glycos_transf_2	GT2_Glycos_transf_2	GT2_Glycos_transf_2	46	48997	TRUE
GT2_Glycos_transf_2_GT2_Glycos_transf_2	GT2_Glycos_transf_2	GT2_Glycos_transf_2	46	53334	TRUE
GT2_Glycos_transf_2_GT2_Glycos_transf_2	GT2_Glycos_transf_2	GT2_Glycos_transf_2	46	55792	TRUE
GT2_Glycos_transf_2_GT2_Glycos_transf_2	GT2_Glycos_transf_2	GT2_Glycos_transf_2	46	56154	TRUE
GT2_Glycos_transf_2_GT2_Glycos_transf_2	GT2_Glycos_transf_2	GT2_Glycos_transf_2	46	58811	TRUE
GT2_Glycos_transf_2_GT2_Glycos_transf_2	GT2_Glycos_transf_2	GT2_Glycos_transf_2	46	75487	TRUE
GT2_Glycos_transf_2_GT2_Glycos_transf_2	GT2_Glycos_transf_2	GT2_Glycos_transf_2	47	54160	TRUE
GT2_Glycos_transf_2_GT2_Glycos_transf_2	GT2_Glycos_transf_2	GT2_Glycos_transf_2	47	56730	TRUE
GT2_Glycos_transf_2_GT2_Glycos_transf_2	GT2_Glycos_transf_2	GT2_Glycos_transf_2	47	56881	TRUE
GT2_Glycos_transf_2_GT2_Glycos_transf_2	GT2_Glycos_transf_2	GT2_Glycos_transf_2	47	60274	TRUE
GT2_Glycos_transf_2_GT2_Glycos_transf_2	GT2_Glycos_transf_2	GT2_Glycos_transf_2	47	60415	TRUE
GT2_Glycos_transf_2_GT2_Glycos_transf_2	GT2_Glycos_transf_2	GT2_Glycos_transf_2	48	52370	TRUE
GT2_Glycos_transf_2_GT2_Glycos_transf_2	GT2_Glycos_transf_2	GT2_Glycos_transf_2	48	54931	TRUE
GT2_Glycos_transf_2_GT2_Glycos_transf_2	GT2_Glycos_transf_2	GT2_Glycos_transf_2	48	56844	TRUE
GT2_Glycos_transf_2_GT2_Glycos_transf_2	GT2_Glycos_transf_2	GT2_Glycos_transf_2	49	40471	TRUE
GT2_Glycos_transf_2_GT2_Glycos_transf_2	GT2_Glycos_transf_2	GT2_Glycos_transf_2	49	50456	TRUE
GT2_Glycos_transf_2_GT2_Glycos_transf_2	GT2_Glycos_transf_2	GT2_Glycos_transf_2	49	52627	TRUE
GT2_Glycos_transf_2_GT2_Glycos_transf_2	GT2_Glycos_transf_2	GT2_Glycos_transf_2	49	54354	TRUE
GT2_Glycos_transf_2_GT2_Glycos_transf_2	GT2_Glycos_transf_2	GT2_Glycos_transf_2	49	62633	TRUE
GT2_Glycos_transf_2_GT2_Glycos_transf_2	GT2_Glycos_transf_2	GT2_Glycos_transf_2	5	10274	TRUE
GT2_Glycos_transf_2_GT2_Glycos_transf_2	GT2_Glycos_transf_2	GT2_Glycos_transf_2	5	3871	TRUE
GT2_Glycos_transf_2_GT2_Glycos_transf_2	GT2_Glycos_transf_2	GT2_Glycos_transf_2	5	3893	TRUE
GT2_Glycos_transf_2_GT2_Glycos_transf_2	GT2_Glycos_transf_2	GT2_Glycos_transf_2	5	3951	TRUE
GT2_Glycos_transf_2_GT2_Glycos_transf_2	GT2_Glycos_transf_2	GT2_Glycos_transf_2	5	4056	TRUE
GT2_Glycos_transf_2_GT2_Glycos_transf_2	GT2_Glycos_transf_2	GT2_Glycos_transf_2	5	4084	TRUE
GT2_Glycos_transf_2_GT2_Glycos_transf_2	GT2_Glycos_transf_2	GT2_Glycos_transf_2	5	4114	TRUE
GT2_Glycos_transf_2_GT2_Glycos_transf_2	GT2_Glycos_transf_2	GT2_Glycos_transf_2	5	4129	TRUE
GT2_Glycos_transf_2_GT2_Glycos_transf_2	GT2_Glycos_transf_2	GT2_Glycos_transf_2	5	4205	TRUE
GT2_Glycos_transf_2_GT2_Glycos_transf_2	GT2_Glycos_transf_2	GT2_Glycos_transf_2	5	4210	TRUE
GT2_Glycos_transf_2_GT2_Glycos_transf_2	GT2_Glycos_transf_2	GT2_Glycos_transf_2	5	4320	TRUE
GT2_Glycos_transf_2_GT2_Glycos_transf_2	GT2_Glycos_transf_2	GT2_Glycos_transf_2	5	4327	TRUE
GT2_Glycos_transf_2_GT2_Glycos_transf_2	GT2_Glycos_transf_2	GT2_Glycos_transf_2	5	4334	TRUE
GT2_Glycos_transf_2_GT2_Glycos_transf_2	GT2_Glycos_transf_2	GT2_Glycos_transf_2	5	4365	TRUE
GT2_Glycos_transf_2_GT2_Glycos_transf_2	GT2_Glycos_transf_2	GT2_Glycos_transf_2	5	4395	TRUE
GT2_Glycos_transf_2_GT2_Glycos_transf_2	GT2_Glycos_transf_2	GT2_Glycos_transf_2	5	4401	TRUE
GT2_Glycos_transf_2_GT2_Glycos_transf_2	GT2_Glycos_transf_2	GT2_Glycos_transf_2	5	4412	TRUE
GT2_Glycos_transf_2_GT2_Glycos_transf_2	GT2_Glycos_transf_2	GT2_Glycos_transf_2	5	4455	TRUE
GT2_Glycos_transf_2_GT2_Glycos_transf_2	GT2_Glycos_transf_2	GT2_Glycos_transf_2	5	4524	TRUE
GT2_Glycos_transf_2_GT2_Glycos_transf_2	GT2_Glycos_transf_2	GT2_Glycos_transf_2	5	4592	TRUE
GT2_Glycos_transf_2_GT2_Glycos_transf_2	GT2_Glycos_transf_2	GT2_Glycos_transf_2	5	4616	TRUE
GT2_Glycos_transf_2_GT2_Glycos_transf_2	GT2_Glycos_transf_2	GT2_Glycos_transf_2	5	4652	TRUE
GT2_Glycos_transf_2_GT2_Glycos_transf_2	GT2_Glycos_transf_2	GT2_Glycos_transf_2	5	4668	TRUE
GT2_Glycos_transf_2_GT2_Glycos_transf_2	GT2_Glycos_transf_2	GT2_Glycos_transf_2	5	4674	TRUE
GT2_Glycos_transf_2_GT2_Glycos_transf_2	GT2_Glycos_transf_2	GT2_Glycos_transf_2	5	4709	TRUE
GT2_Glycos_transf_2_GT2_Glycos_transf_2	GT2_Glycos_transf_2	GT2_Glycos_transf_2	5	4736	TRUE
GT2_Glycos_transf_2_GT2_Glycos_transf_2	GT2_Glycos_transf_2	GT2_Glycos_transf_2	5	4785	TRUE
GT2_Glycos_transf_2_GT2_Glycos_transf_2	GT2_Glycos_transf_2	GT2_Glycos_transf_2	5	4786	TRUE
GT2_Glycos_transf_2_GT2_Glycos_transf_2	GT2_Glycos_transf_2	GT2_Glycos_transf_2	5	4821	TRUE
GT2_Glycos_transf_2_GT2_Glycos_transf_2	GT2_Glycos_transf_2	GT2_Glycos_transf_2	5	4864	TRUE
GT2_Glycos_transf_2_GT2_Glycos_transf_2	GT2_Glycos_transf_2	GT2_Glycos_transf_2	5	4910	TRUE
GT2_Glycos_transf_2_GT2_Glycos_transf_2	GT2_Glycos_transf_2	GT2_Glycos_transf_2	5	4912	TRUE
GT2_Glycos_transf_2_GT2_Glycos_transf_2	GT2_Glycos_transf_2	GT2_Glycos_transf_2	5	4915	TRUE
GT2_Glycos_transf_2_GT2_Glycos_transf_2	GT2_Glycos_transf_2	GT2_Glycos_transf_2	5	5021	TRUE
GT2_Glycos_transf_2_GT2_Glycos_transf_2	GT2_Glycos_transf_2	GT2_Glycos_transf_2	5	5046	TRUE
GT2_Glycos_transf_2_GT2_Glycos_transf_2	GT2_Glycos_transf_2	GT2_Glycos_transf_2	5	5065	TRUE
GT2_Glycos_transf_2_GT2_Glycos_transf_2	GT2_Glycos_transf_2	GT2_Glycos_transf_2	5	5188	TRUE
GT2_Glycos_transf_2_GT2_Glycos_transf_2	GT2_Glycos_transf_2	GT2_Glycos_transf_2	5	5217	TRUE
GT2_Glycos_transf_2_GT2_Glycos_transf_2	GT2_Glycos_transf_2	GT2_Glycos_transf_2	5	5267	TRUE
GT2_Glycos_transf_2_GT2_Glycos_transf_2	GT2_Glycos_transf_2	GT2_Glycos_transf_2	5	5267	TRUE
GT2_Glycos_transf_2_GT2_Glycos_transf_2	GT2_Glycos_transf_2	GT2_Glycos_transf_2	5	5287	TRUE
GT2_Glycos_transf_2_GT2_Glycos_transf_2	GT2_Glycos_transf_2	GT2_Glycos_transf_2	5	5316	TRUE
GT2_Glycos_transf_2_GT2_Glycos_transf_2	GT2_Glycos_transf_2	GT2_Glycos_transf_2	5	5327	TRUE
GT2_Glycos_transf_2_GT2_Glycos_transf_2	GT2_Glycos_transf_2	GT2_Glycos_transf_2	5	5330	TRUE
GT2_Glycos_transf_2_GT2_Glycos_transf_2	GT2_Glycos_transf_2	GT2_Glycos_transf_2	5	5337	TRUE
GT2_Glycos_transf_2_GT2_Glycos_transf_2	GT2_Glycos_transf_2	GT2_Glycos_transf_2	5	5349	TRUE
GT2_Glycos_transf_2_GT2_Glycos_transf_2	GT2_Glycos_transf_2	GT2_Glycos_transf_2	5	5376	TRUE
GT2_Glycos_transf_2_GT2_Glycos_transf_2	GT2_Glycos_transf_2	GT2_Glycos_transf_2	5	5429	TRUE
GT2_Glycos_transf_2_GT2_Glycos_transf_2	GT2_Glycos_transf_2	GT2_Glycos_transf_2	5	5456	TRUE
GT2_Glycos_transf_2_GT2_Glycos_transf_2	GT2_Glycos_transf_2	GT2_Glycos_transf_2	5	5475	TRUE
GT2_Glycos_transf_2_GT2_Glycos_transf_2	GT2_Glycos_transf_2	GT2_Glycos_transf_2	5	5526	TRUE
GT2_Glycos_transf_2_GT2_Glycos_transf_2	GT2_Glycos_transf_2	GT2_Glycos_transf_2	5	5552	TRUE
GT2_Glycos_transf_2_GT2_Glycos_transf_2	GT2_Glycos_transf_2	GT2_Glycos_transf_2	5	5574	TRUE
GT2_Glycos_transf_2_GT2_Glycos_transf_2	GT2_Glycos_transf_2	GT2_Glycos_transf_2	5	5660	TRUE
GT2_Glycos_transf_2_GT2_Glycos_transf_2	GT2_Glycos_transf_2	GT2_Glycos_transf_2	5	5678	TRUE
GT2_Glycos_transf_2_GT2_Glycos_transf_2	GT2_Glycos_transf_2	GT2_Glycos_transf_2	5	5710	TRUE
GT2_Glycos_transf_2_GT2_Glycos_transf_2	GT2_Glycos_transf_2	GT2_Glycos_transf_2	5	5742	TRUE
GT2_Glycos_transf_2_GT2_Glycos_transf_2	GT2_Glycos_transf_2	GT2_Glycos_transf_2	5	5789	TRUE
GT2_Glycos_transf_2_GT2_Glycos_transf_2	GT2_Glycos_transf_2	GT2_Glycos_transf_2	5	5987	TRUE
GT2_Glycos_transf_2_GT2_Glycos_transf_2	GT2_Glycos_transf_2	GT2_Glycos_transf_2	5	6037	TRUE
GT2_Glycos_transf_2_GT2_Glycos_transf_2	GT2_Glycos_transf_2	GT2_Glycos_transf_2	5	6109	TRUE
GT2_Glycos_transf_2_GT2_Glycos_transf_2	GT2_Glycos_transf_2	GT2_Glycos_transf_2	5	6200	TRUE
GT2_Glycos_transf_2_GT2_Glycos_transf_2	GT2_Glycos_transf_2	GT2_Glycos_transf_2	5	6365	TRUE
GT2_Glycos_transf_2_GT2_Glycos_transf_2	GT2_Glycos_transf_2	GT2_Glycos_transf_2	5	6455	TRUE
GT2_Glycos_transf_2_GT2_Glycos_transf_2	GT2_Glycos_transf_2	GT2_Glycos_transf_2	5	6525	TRUE
GT2_Glycos_transf_2_GT2_Glycos_transf_2	GT2_Glycos_transf_2	GT2_Glycos_transf_2	5	6607	TRUE
GT2_Glycos_transf_2_GT2_Glycos_transf_2	GT2_Glycos_transf_2	GT2_Glycos_transf_2	5	6811	TRUE
GT2_Glycos_transf_2_GT2_Glycos_transf_2	GT2_Glycos_transf_2	GT2_Glycos_transf_2	5	7103	TRUE
GT2_Glycos_transf_2_GT2_Glycos_transf_2	GT2_Glycos_transf_2	GT2_Glycos_transf_2	5	7297	TRUE
GT2_Glycos_transf_2_GT2_Glycos_transf_2	GT2_Glycos_transf_2	GT2_Glycos_transf_2	5	7365	TRUE
GT2_Glycos_transf_2_GT2_Glycos_transf_2	GT2_Glycos_transf_2	GT2_Glycos_transf_2	5	7384	TRUE
GT2_Glycos_transf_2_GT2_Glycos_transf_2	GT2_Glycos_transf_2	GT2_Glycos_transf_2	5	7624	TRUE
GT2_Glycos_transf_2_GT2_Glycos_transf_2	GT2_Glycos_transf_2	GT2_Glycos_transf_2	5	8056	TRUE
GT2_Glycos_transf_2_GT2_Glycos_transf_2	GT2_Glycos_transf_2	GT2_Glycos_transf_2	5	8086	TRUE
GT2_Glycos_transf_2_GT2_Glycos_transf_2	GT2_Glycos_transf_2	GT2_Glycos_transf_2	5	8108	TRUE
GT2_Glycos_transf_2_GT2_Glycos_transf_2	GT2_Glycos_transf_2	GT2_Glycos_transf_2	5	8167	TRUE
GT2_Glycos_transf_2_GT2_Glycos_transf_2	GT2_Glycos_transf_2	GT2_Glycos_transf_2	5	8412	TRUE
GT2_Glycos_transf_2_GT2_Glycos_transf_2	GT2_Glycos_transf_2	GT2_Glycos_transf_2	5	8958	TRUE
GT2_Glycos_transf_2_GT2_Glycos_transf_2	GT2_Glycos_transf_2	GT2_Glycos_transf_2	5	9090	TRUE
GT2_Glycos_transf_2_GT2_Glycos_transf_2	GT2_Glycos_transf_2	GT2_Glycos_transf_2	5	9095	TRUE
GT2_Glycos_transf_2_GT2_Glycos_transf_2	GT2_Glycos_transf_2	GT2_Glycos_transf_2	5	9885	TRUE
GT2_Glycos_transf_2_GT2_Glycos_transf_2	GT2_Glycos_transf_2	GT2_Glycos_transf_2	50	48816	TRUE
GT2_Glycos_transf_2_GT2_Glycos_transf_2	GT2_Glycos_transf_2	GT2_Glycos_transf_2	50	76396	TRUE
GT2_Glycos_transf_2_GT2_Glycos_transf_2	GT2_Glycos_transf_2	GT2_Glycos_transf_2	51	41964	TRUE
GT2_Glycos_transf_2_GT2_Glycos_transf_2	GT2_Glycos_transf_2	GT2_Glycos_transf_2	51	54888	TRUE
GT2_Glycos_transf_2_GT2_Glycos_transf_2	GT2_Glycos_transf_2	GT2_Glycos_transf_2	51	58053	TRUE
GT2_Glycos_transf_2_GT2_Glycos_transf_2	GT2_Glycos_transf_2	GT2_Glycos_transf_2	51	61398	TRUE
GT2_Glycos_transf_2_GT2_Glycos_transf_2	GT2_Glycos_transf_2	GT2_Glycos_transf_2	51	81687	TRUE
GT2_Glycos_transf_2_GT2_Glycos_transf_2	GT2_Glycos_transf_2	GT2_Glycos_transf_2	51	81942	TRUE
GT2_Glycos_transf_2_GT2_Glycos_transf_2	GT2_Glycos_transf_2	GT2_Glycos_transf_2	52	44402	TRUE
GT2_Glycos_transf_2_GT2_Glycos_transf_2	GT2_Glycos_transf_2	GT2_Glycos_transf_2	52	60875	TRUE
GT2_Glycos_transf_2_GT2_Glycos_transf_2	GT2_Glycos_transf_2	GT2_Glycos_transf_2	52	62536	TRUE
GT2_Glycos_transf_2_GT2_Glycos_transf_2	GT2_Glycos_transf_2	GT2_Glycos_transf_2	52	65911	TRUE
GT2_Glycos_transf_2_GT2_Glycos_transf_2	GT2_Glycos_transf_2	GT2_Glycos_transf_2	52	93150	TRUE
GT2_Glycos_transf_2_GT2_Glycos_transf_2	GT2_Glycos_transf_2	GT2_Glycos_transf_2	52	95181	TRUE
GT2_Glycos_transf_2_GT2_Glycos_transf_2	GT2_Glycos_transf_2	GT2_Glycos_transf_2	53	60555	TRUE
GT2_Glycos_transf_2_GT2_Glycos_transf_2	GT2_Glycos_transf_2	GT2_Glycos_transf_2	53	63435	TRUE
GT2_Glycos_transf_2_GT2_Glycos_transf_2	GT2_Glycos_transf_2	GT2_Glycos_transf_2	53	64716	TRUE
GT2_Glycos_transf_2_GT2_Glycos_transf_2	GT2_Glycos_transf_2	GT2_Glycos_transf_2	54	45895	TRUE
GT2_Glycos_transf_2_GT2_Glycos_transf_2	GT2_Glycos_transf_2	GT2_Glycos_transf_2	54	61394	TRUE
GT2_Glycos_transf_2_GT2_Glycos_transf_2	GT2_Glycos_transf_2	GT2_Glycos_transf_2	54	67791	TRUE
GT2_Glycos_transf_2_GT2_Glycos_transf_2	GT2_Glycos_transf_2	GT2_Glycos_transf_2	55	52076	TRUE
GT2_Glycos_transf_2_GT2_Glycos_transf_2	GT2_Glycos_transf_2	GT2_Glycos_transf_2	55	68862	TRUE
GT2_Glycos_transf_2_GT2_Glycos_transf_2	GT2_Glycos_transf_2	GT2_Glycos_transf_2	56	46580	TRUE
GT2_Glycos_transf_2_GT2_Glycos_transf_2	GT2_Glycos_transf_2	GT2_Glycos_transf_2	56	56474	TRUE
GT2_Glycos_transf_2_GT2_Glycos_transf_2	GT2_Glycos_transf_2	GT2_Glycos_transf_2	56	63789	TRUE
GT2_Glycos_transf_2_GT2_Glycos_transf_2	GT2_Glycos_transf_2	GT2_Glycos_transf_2	56	88142	TRUE
GT2_Glycos_transf_2_GT2_Glycos_transf_2	GT2_Glycos_transf_2	GT2_Glycos_transf_2	57	66285	TRUE
GT2_Glycos_transf_2_GT2_Glycos_transf_2	GT2_Glycos_transf_2	GT2_Glycos_transf_2	57	66602	TRUE
GT2_Glycos_transf_2_GT2_Glycos_transf_2	GT2_Glycos_transf_2	GT2_Glycos_transf_2	58	67372	TRUE
GT2_Glycos_transf_2_GT2_Glycos_transf_2	GT2_Glycos_transf_2	GT2_Glycos_transf_2	58	68544	TRUE
GT2_Glycos_transf_2_GT2_Glycos_transf_2	GT2_Glycos_transf_2	GT2_Glycos_transf_2	58	73709	TRUE
GT2_Glycos_transf_2_GT2_Glycos_transf_2	GT2_Glycos_transf_2	GT2_Glycos_transf_2	59	50511	TRUE
GT2_Glycos_transf_2_GT2_Glycos_transf_2	GT2_Glycos_transf_2	GT2_Glycos_transf_2	59	65265	TRUE
GT2_Glycos_transf_2_GT2_Glycos_transf_2	GT2_Glycos_transf_2	GT2_Glycos_transf_2	59	69740	TRUE
GT2_Glycos_transf_2_GT2_Glycos_transf_2	GT2_Glycos_transf_2	GT2_Glycos_transf_2	6	10175	TRUE
GT2_Glycos_transf_2_GT2_Glycos_transf_2	GT2_Glycos_transf_2	GT2_Glycos_transf_2	6	10339	TRUE
GT2_Glycos_transf_2_GT2_Glycos_transf_2	GT2_Glycos_transf_2	GT2_Glycos_transf_2	6	10650	TRUE
GT2_Glycos_transf_2_GT2_Glycos_transf_2	GT2_Glycos_transf_2	GT2_Glycos_transf_2	6	10946	TRUE
GT2_Glycos_transf_2_GT2_Glycos_transf_2	GT2_Glycos_transf_2	GT2_Glycos_transf_2	6	10991	TRUE
GT2_Glycos_transf_2_GT2_Glycos_transf_2	GT2_Glycos_transf_2	GT2_Glycos_transf_2	6	11173	TRUE
GT2_Glycos_transf_2_GT2_Glycos_transf_2	GT2_Glycos_transf_2	GT2_Glycos_transf_2	6	11248	TRUE
GT2_Glycos_transf_2_GT2_Glycos_transf_2	GT2_Glycos_transf_2	GT2_Glycos_transf_2	6	4110	TRUE
GT2_Glycos_transf_2_GT2_Glycos_transf_2	GT2_Glycos_transf_2	GT2_Glycos_transf_2	6	4314	TRUE
GT2_Glycos_transf_2_GT2_Glycos_transf_2	GT2_Glycos_transf_2	GT2_Glycos_transf_2	6	4411	TRUE
GT2_Glycos_transf_2_GT2_Glycos_transf_2	GT2_Glycos_transf_2	GT2_Glycos_transf_2	6	4483	TRUE
GT2_Glycos_transf_2_GT2_Glycos_transf_2	GT2_Glycos_transf_2	GT2_Glycos_transf_2	6	4710	TRUE
GT2_Glycos_transf_2_GT2_Glycos_transf_2	GT2_Glycos_transf_2	GT2_Glycos_transf_2	6	4723	TRUE
GT2_Glycos_transf_2_GT2_Glycos_transf_2	GT2_Glycos_transf_2	GT2_Glycos_transf_2	6	4767	TRUE
[truncated: 38,063 more rows]
