# Supplementary material for: Herbivorous fish microbiome adaptations to sulfated dietary polysaccharides
Source: Research Square preprint supplement (doi:10.21203/rs.3.rs-1754689/v1), 2022-06-21
Supplement: Supplementary file 4 [file 96f98d28d22244d3414f73ce.xlsx]

## Sheet: CAZy v10 fish-ruminant comp
Additional File 12.
Class abundances and statistical calculations have been normalized for total number of predicted proteins in each sample set.
Full metagenomic annotations are provided in Additional Files 10-14.
CAZy Class ID	raw F5	raw F6	raw F7	raw F8	F5 per 1M	F6 per 1M	F7 per 1M	F8 per 1M	raw red deer	raw reindeer	raw sheep	raw cattle	raw co-asembly	red deer per 1M	reindeer per 1M	sheep per 1M	cattle per 1M	co-asembly per 1M	diff p-value NORM F567, Rum 1 sided, homo-scedastic	raw F5+6+7 total	raw Ruminant total	avg norm F567 total	avg norm rum tot	avg rum-fish diff	fish pct signal seq	rum pct signal seq	CAZy annotation
CE1	63	97	92	1	312.15	343.576	346.048	1.42486	371	149	190	10	157	1413.47	1039.97	1622.71	205.605	847.33	0.039802	252	877	333.925	1025.82	691.891	0.67	0.32	acetyl xylan esterase (EC 3.1.1.72); cinnamoyl esterase (EC 3.1.1.-); feruloyl esterase (EC 3.1.1.73); carboxylesterase (EC 3.1.1.1); S-formylglutathione hydrolase (EC 3.1.2.12); diacylglycerol O-acyltransferase (EC 2.3.1.20); trehalose 6-O-mycolyltransferase (EC 2.3.1.122)
CE11	43	70	81	4	213.055	247.941	304.673	5.69943	93	33	40	14	39	354.319	230.328	341.623	287.847	210.483	0.257982	194	219	255.223	284.92	29.6972	0	0	UDP-3-0-acyl N-acetylglucosamine deacetylase (EC 3.5.1.108).
CE12	5	2	2	2	24.7738	7.08403	7.52278	2.84971	49	32	39		54	186.684	223.348	333.083	0	291.438	0.0227791	9	174	13.1269	206.911	193.784	0.67	0.31	pectin acetylesterase (EC 3.1.1.-); rhamnogalacturonan acetylesterase (EC 3.1.1.-); acetyl xylan esterase (EC 3.1.1.72)
CE13				9	0	0	0	12.8237	7	1		2	7	26.6692	6.97963	0	41.121	37.779	0.0425933	0	17	0	22.5098	22.5098	na	0	pectin acetylesterase (EC 3.1.1.-)
CE14	18	13	17	1	89.1857	46.0462	63.9437	1.42486	12	9	4	7	5	45.7186	62.8167	34.1623	143.923	26.985	0.452818	48	37	66.3919	62.7212	-3.67067	0	0.22	N-acetyl-1-D-myo-inosityl-2-amino-2-deoxy-alpha-D-glucopyranoside deacetylase (EC 3.5.1.89); diacetylchitobiose deacetylase (EC 3.5.1.-); mycothiol S-conjugate amidase (EC 3.5.1.-)
CE15	1	1		9	4.95476	3.54202	0	12.8237	16	21	12		10	60.9582	146.572	102.487	0	53.97	0.0385721	2	59	2.83226	72.7975	69.9652	0	0.31	4-O-methyl-glucuronoyl methylesterase (EC 3.1.1.-)
CE16	8	1	3	2	39.6381	3.54202	11.2842	2.84971				1		0	0	0	20.5605	0	0.0991078	12	1	18.1548	4.1121	-14.0427	1	na	acetylesterase (EC 3.1.1.6) active on various carbohydrate acetyl esters
CE17	3	5	27	6	14.8643	17.7101	101.558	8.54914	2	1		13	7	7.61977	6.97963	0	267.286	37.779	0.398423	35	23	44.7107	63.9329	19.2223	0.71	0.17	acetylmannan esterase (3.1.1.-)
CE19	5	1	8	1	24.7738	3.54202	30.0911	1.42486	58	25	35	10	35	220.973	174.491	298.92	205.605	188.895	0.00026751	14	163	19.469	217.777	198.308	0.33	0.34
CE2	6	20	8	1	29.7286	70.8403	30.0911	1.42486	21	16	13	2	25	80.0076	111.674	111.028	41.121	134.925	0.0353677	34	77	43.5534	95.7511	52.1977	0.66	0.39	acetyl xylan esterase (EC 3.1.1.72).
CE3	17	12	32	1	84.231	42.5042	120.365	1.42486	29	4	11	44	16	110.487	27.9185	93.9464	904.661	86.3521	0.245559	61	104	82.3666	244.673	162.306	0.55	0.21	acetyl xylan esterase (EC 3.1.1.72).
CE4	105	200	156	6	520.25	708.403	586.777	8.54914	218	112	115	7	149	830.555	781.719	982.167	143.923	804.154	0.31022	461	601	605.144	708.504	103.36	0.26	0.27	acetyl xylan esterase (EC 3.1.1.72); chitin deacetylase (EC 3.5.1.41); chitooligosaccharide deacetylase (EC 3.5.1.-); peptidoglycan GlcNAc deacetylase (EC 3.5.1.-); peptidoglycan N-acetylmuramic acid deacetylase (EC 3.5.1.-).
CE6	13	30	10	1	64.4119	106.261	37.6139	1.42486	25	14	12	8	10	95.2472	97.7149	102.487	164.484	53.97	0.137385	53	69	69.4288	102.781	33.3518	0.8	0.29	acetyl xylan esterase (EC 3.1.1.72).
CE7	11	20	15	9	54.5024	70.8403	56.4209	12.8237	36	27	23	14	20	137.156	188.45	196.433	287.847	107.94	0.0122412	46	120	60.5879	183.565	122.977	0.49	0.29	acetyl xylan esterase (EC 3.1.1.72); cephalosporin-C deacetylase (EC 3.1.1.41).
CE8	2			3	9.90953	0	0	4.27457	47	23	45	20	63	179.065	160.532	384.326	411.21	340.011	0.0029441	2	198	3.30318	295.029	291.725	1	0.25	pectin methylesterase (EC 3.1.1.11).
CE9	70	40	47	2	346.833	141.681	176.785	2.84971	97	80	64	4	91	369.559	558.371	546.597	82.2419	491.127	0.094276	157	336	221.767	409.579	187.813	0	0	N-acetylglucosamine 6-phosphate deacetylase (EC 3.5.1.25); N-acetylglucosamine 6-phosphate deacetylase (EC 3.5.1.80)
GH1	41	31	15	3	203.145	109.803	56.4209	4.27457	33	15	28	9	44	125.726	104.695	239.136	185.044	237.468	0.148852	87	129	123.123	178.414	55.291	0.03	0	beta-glucosidase (EC 3.2.1.21); beta-galactosidase (EC 3.2.1.23); beta-mannosidase (EC 3.2.1.25); beta-glucuronidase (EC 3.2.1.31); beta-xylosidase (EC 3.2.1.37); beta-D-fucosidase (EC 3.2.1.38); phlorizin hydrolase (EC 3.2.1.62); exo-beta-1,4-glucanase (EC 3.2.1.74); 6-phospho-beta-galactosidase (EC 3.2.1.85); 6-phospho-beta-glucosidase (EC 3.2.1.86); strictosidine beta-glucosidase (EC 3.2.1.105…
GH10	48	104	63	1	237.829	368.37	236.968	1.42486	37	18	19		26	140.966	125.633	162.271	0	140.322	0.00787438	215	100	281.055	113.838	-167.217	0.71	0.47	endo-1,4-beta-xylanase (EC 3.2.1.8); endo-1,3-beta-xylanase (EC 3.2.1.32); tomatinase (EC 3.2.1.-); xylan endotransglycosylase (EC 2.4.2.-); endo-beta-1,4-glucanase (EC 3.2.1.4)
GH101			1	2	0	0	3.76139	2.84971						0	0	0	0	0	0.109972	1	0	1.2538	0	-1.2538	1	na	endo-alpha-N-acetylgalactosaminidase (EC 3.2.1.97)
GH102	13	10	6	10	64.4119	35.4202	22.5684	14.2486	2	2	2		2	7.61977	13.9593	17.0812	0	10.794	0.0100486	29	8	40.8001	9.89084	-30.9093	0.94	0.25	peptidoglycan lytic transglycosylase (EC 3.2.1.-)
GH103	14	13	6	12	69.3667	46.0462	22.5684	17.0983	3	4	4	15	5	11.4297	27.9185	34.1623	308.407	26.985	0.327902	33	31	45.9938	81.7805	35.7868	0.81	0.13	peptidoglycan lytic transglycosylase (EC 3.2.1.-)
GH105	22	13	57	76	109.005	46.0462	214.399	108.289	58	30	40	6	64	220.973	209.389	341.623	123.363	345.408	0.0556418	92	198	123.15	248.151	125.001	0.7	0.32	unsaturated rhamnogalacturonyl hydrolase (EC 3.2.1.172); d-4,5-unsaturated beta-glucuronyl hydrolase (EC 3.2.1.-); d-4,5-unsaturated alpha-galacturonidase (EC 3.2.1.-)
GH106	7	13	23	18	34.6833	46.0462	86.512	25.6474	41	42	24		27	156.205	293.145	204.974	0	145.719	0.0790271	43	134	55.7472	160.009	104.261	0.7	0.34	alpha-L-rhamnosidase (EC 3.2.1.40); rhamnogalacturonan alpha-L-rhamnohydrolase (EC 3.2.1.174)
GH108	7	9	12	32	34.6833	31.8782	45.1367	45.5954	12	2	1	4	7	45.7186	13.9593	8.54058	82.2419	37.779	0.491069	28	26	37.2327	37.6479	0.415152	0	0	N-acetylmuramidase (EC 3.2.1.17)
GH109	20	35	23	3	99.0953	123.971	86.512	4.27457	67	73	30	2	42	255.262	509.513	256.218	41.121	226.674	0.0861769	78	214	103.193	257.758	154.565	0.04	0.23	alpha-N-acetylgalactosaminidase (EC 3.2.1.49)
GH11				5	0	0	0	7.12428		2				0	13.9593	0	0	0	0.240809	0	2	0	2.79185	2.79185	na	0.5	endo-beta-1,4-xylanase (EC 3.2.1.8); endo-beta-1,3-xylanase (EC 3.2.1.32)
GH110	51	83	55	5	252.693	293.987	206.877	7.12428	1		1			3.80989	0	8.54058	0	0	5.26284e-06	189	2	251.186	2.47009	-248.716	0.64	0.5	alpha-galactosidase (EC 3.2.1.22); alpha-1,3-galactosidase (EC 3.2.1.-)
GH112	9	4	4	4	44.5929	14.1681	15.0456	5.69943	1				3	3.80989	0	0	0	16.191	0.0249468	17	4	24.6022	4.00018	-20.602	0	0	lacto-N-biose phosphorylase or galacto-N-biose phosphorylase (EC 2.4.1.211); D-galactosyl-beta-1,4-L-rhamnose phosphorylase (EC 2.4.1.247)
GH113	1	4	2	15	4.95476	14.1681	7.52278	21.3728	1				1	3.80989	0	0	0	5.397	0.0158957	7	2	8.88187	1.84138	-7.04049	0	0	beta-mannanase (EC 3.2.1.78)
GH114		1		28	0	3.54202	0	39.896	9		5	9	6	34.289	0	42.7029	185.044	32.382	0.114871	1	29	1.18067	58.8836	57.703	1	0.41	endo-alpha-1,4-polygalactosaminidase (EC 3.2.1.109)
GH115	10	15	60	24	49.5476	53.1303	225.684	34.1966	36	29	28	1	27	137.156	202.409	239.136	20.5605	145.719	0.28335	85	121	109.454	148.996	39.5424	0.61	0.2	xylan alpha-1,2-glucuronidase (3.2.1.131); alpha-(4-O-methyl)-glucuronidase (3.2.1.-)
GH116	6	15	6	2	29.7286	53.1303	22.5684	2.84971	1	1		6		3.80989	6.97963	0	123.363	0	0.40455	27	8	35.1424	26.8305	-8.31192	0.38	0.13	beta-glucosidase (EC 3.2.1.21); beta-xylosidase (EC 3.2.1.37); acid beta-glucosidase/beta-glucosylceramidase (EC 3.2.1.45); beta-N-acetylglucosaminidase (EC 3.2.1.52)
GH117	52	106	273	17	257.648	375.454	1026.86	24.2226	22	18	18		19	83.8175	125.633	153.731	0	102.543	0.0207813	431	77	553.321	93.1449	-460.176	0.7	0.31	beta-D-galactofuranosidase (EC 3.2.1.146); alpha-neoagaro-oligosaccharide hydrolase (EC 3.2.1.159)
GH119				25	0	0	0	35.6214	12	1		1		45.7186	6.97963	0	20.5605	0	0.124914	0	14	0	14.6518	14.6518	na	0.21	alpha-amylase (EC 3.2.1.1)
GH120			1	3	0	0	3.76139	4.27457	3	2	3	2	11	11.4297	13.9593	25.6218	41.121	59.367	0.0258196	1	21	1.2538	30.2997	29.0459	0	0	beta-xylosidase (EC 3.2.1.37)
GH121		3		10	0	10.6261	0	14.2486	15	6	5		8	57.1483	41.8778	42.7029	0	43.176	0.0219414	3	34	3.54202	36.981	33.439	0.33	0.29	beta-L-arabinobiosidase (EC 3.2.1.-)
GH123	5	3	10	3	24.7738	10.6261	37.6139	4.27457	3	7	1	1	1	11.4297	48.8574	8.54058	20.5605	5.397	0.334329	18	13	24.3379	18.957	-5.3809	0.65	0.38	beta-N-acetylgalactosaminidase (EC 3.2.1.53); glycosphingolipid beta-N-acetylgalactosaminidase (EC 3.2.1.-)
GH124				12	0	0	0	17.0983				1		0	0	0	20.5605	0	0.240809	0	1	0	4.1121	4.1121	na	1	endoglucanase (EC 3.2.1.4)
GH125	2	5	3	1	9.90953	17.7101	11.2842	1.42486	13	18	7		7	49.5285	125.633	59.7841	0	37.779	0.0894376	10	45	12.9679	54.545	41.5771	0.4	0.36	exo-alpha-1,6-mannosidase (EC 3.2.1.-)
GH126	2		2	6	9.90953	0	7.52278	8.54914	1	1	1	11	1	3.80989	6.97963	8.54058	226.165	5.397	0.239224	4	15	5.81077	50.1785	44.3677	0.25	0.07	alpha-amylase (EC 3.2.1.-)
GH127	38	45	33	17	188.281	159.391	124.126	24.2226	67	47	28	3	50	255.262	328.043	239.136	61.6814	269.85	0.13788	116	195	157.266	230.795	73.5287	0.56	0.28	beta-L-arabinofuranosidase (EC 3.2.1.185); 3-C-carboxy-5-deoxy-L-xylose (aceric acid) hydrolase (EC 3.2.1.-); alpha-1,3-(3,6)-anhydro-D-galactosidase (EC 3.2.1.-)
GH128	2	11	9	4	9.90953	38.9622	33.8525	5.69943	16	11	10		4	60.9582	76.776	85.4058	0	21.588	0.192865	22	41	27.5747	48.9456	21.3709	0.71	0.44	beta-1,3-glucanase (EC 3.2.1.39); beta-1,3-glucosidase (EC 3.2.1.-)
GH129		1	1	10	0	3.54202	3.76139	14.2486	2	1			1	7.61977	6.97963	0	0	5.397	0.269349	2	4	2.43447	3.99928	1.56481	0	0.25	alpha-N-acetylgalactosaminidase (EC 3.2.1.49); ; alpha-1,3-(3,6)-anhydro-D-galactosidase (EC 3.2.1.-)
GH13		3		15	0	10.6261	0	21.3728			1	6	3	0	0	8.54058	123.363	16.191	0.220491	3	10	3.54202	29.6189	26.0769	0	0	alpha-amylase (EC 3.2.1.1); pullulanase (EC 3.2.1.41); cyclomaltodextrin glucanotransferase (EC 2.4.1.19); cyclomaltodextrinase (EC 3.2.1.54); trehalose-6-phosphate hydrolase (EC 3.2.1.93); oligo-alpha-glucosidase (EC 3.2.1.10); maltogenic amylase (EC 3.2.1.133); neopullulanase (EC 3.2.1.135); alpha-glucosidase (EC 3.2.1.20); maltotetraose-forming alpha-amylase (EC 3.2.1.60); isoamylase (EC 3.2.1…
GH13_1	161	240	185	7	797.717	850.084	695.858	9.974	351	189	178	25	251	1337.27	1319.15	1520.22	514.012	1354.65	0.0617387	586	994	781.22	1209.06	427.841	0.31	0.25	Hexosyltransferases
GH13_10	98	137	123	1	485.567	485.256	462.651	1.42486	103	60	45	1	71	392.418	418.778	384.326	20.5605	383.187	0.0831368	358	280	477.825	319.854	-157.971	0.05	0.15
GH13_11	2	7	1	1	9.90953	24.7941	3.76139	1.42486	1	1	1	1	4	3.80989	6.97963	8.54058	20.5605	21.588	0.469929	10	8	12.8217	12.2957	-0.52596	0.14	0
GH13_12	1		2	3	4.95476	0	7.52278	4.27457	7	7	6		4	26.6692	48.8574	51.2435	0	21.588	0.0457526	3	24	4.15918	29.6716	25.5125	0.33	0.08
GH13_13	1	5	7	2	4.95476	17.7101	26.3297	2.84971	4	1			4	15.2395	6.97963	0	0	21.588	0.168916	13	9	16.3315	8.76144	-7.57009	0.15	0.11
GH13_14	1	2	2	1	4.95476	7.08403	7.52278	1.42486	1	2	1			3.80989	13.9593	8.54058	0	0	0.370074	5	4	6.52053	5.26195	-1.25858	0	0
GH13_15				13	0	0	0	18.5231					1	0	0	0	0	5.397	0.240809	0	1	0	1.0794	1.0794	0	0
GH13_16	3	3	2	2	14.8643	10.6261	7.52278	2.84971	2	1	4		5	7.61977	6.97963	34.1623	0	26.985	0.328079	8	12	11.0044	15.1494	4.14498	0	0
GH13_17	1			25	4.95476	0	0	35.6214	1			1		3.80989	0	0	20.5605	0	0.288145	1	2	1.65159	4.87407	3.22249	0	0
GH13_18		2		7	0	7.08403	0	9.974						0	0	0	0	0	0.109972	2	0	2.36134	0	-2.36134	0	na
GH13_19		1		3	0	3.54202	0	4.27457	1					3.80989	0	0	0	0	0.382	1	1	1.18067	0.761977	-0.418695	0	1
GH13_2			3	2	0	0	11.2842	2.84971	1	1	1	1		3.80989	6.97963	8.54058	20.5605	0	0.231463	3	4	3.76139	7.97812	4.21672	0	0
GH13_20	2	3	12	1	9.90953	10.6261	45.1367	1.42486	3	3	1		10	11.4297	20.9389	8.54058	0	53.97	0.426649	17	17	21.8908	18.9758	-2.91493	0	0.18
GH13_21		1		2	0	3.54202	0	2.84971				1		0	0	0	20.5605	0	0.308169	1	1	1.18067	4.1121	2.93142	0	na
GH13_23	1	2	1	16	4.95476	7.08403	3.76139	22.7977	4		1		1	15.2395	0	8.54058	0	5.397	0.444194	4	6	5.26673	5.83543	0.568697	0	0
GH13_24				2	0	0	0	2.84971				7		0	0	0	143.923	0	0.240809	0	7	0	28.7847	28.7847	0	na
GH13_25	6	23	13	18	29.7286	81.4664	48.8981	25.6474	32	17	15		17	121.916	118.654	128.109	0	91.7491	0.146845	42	81	53.3644	92.0856	38.7212	0	0
GH13_27		1		4	0	3.54202	0	5.69943					2	0	0	0	0	10.794	0.377918	1	2	1.18067	2.1588	0.978129	0	0
GH13_28			1	9	0	0	3.76139	12.8237						0	0	0	0	0	0.109972	1	0	1.2538	0	-1.2538	0	na
GH13_29		1		27	0	3.54202	0	38.4711	1		2			3.80989	0	17.0812	0	0	0.264851	1	3	1.18067	4.17821	2.99754	0	0
GH13_3	3	7	1	3	14.8643	24.7941	3.76139	4.27457	6	7			7	22.8593	48.8574	0	0	37.779	0.305661	11	20	14.4733	21.8992	7.42589	0.08	0.2
GH13_31				10	0	0	0	14.2486			1			0	0	8.54058	0	0	0.240809	0	1	0	1.70812	1.70812	na	0
GH13_32				4	0	0	0	5.69943	1					3.80989	0	0	0	0	0.240809	0	1	0	0.761977	0.761977	na	1
GH13_33				1	0	0	0	1.42486		1				0	6.97963	0	0	0	0.240809	0	1	0	1.39593	1.39593	na	1
GH13_34				1	0	0	0	1.42486						0	0	0	0	0	#DIV/0!	0	0	0	0	0	0	na
GH13_35				1	0	0	0	1.42486						0	0	0	0	0	#DIV/0!	0	0	0	0	0	0	na
GH13_36		1		2	0	3.54202	0	2.84971	1					3.80989	0	0	0	0	0.382	1	1	1.18067	0.761977	-0.418695	0	0
GH13_38			2	3	0	0	7.52278	4.27457	1	1			1	3.80989	6.97963	0	0	5.397	0.395286	2	3	2.50759	3.2373	0.72971	0	0
GH13_39	1			4	4.95476	0	0	5.69943						0	0	0	0	0	0.109972	1	0	1.65159	0	-1.65159	0	na
GH13_4	1			4	4.95476	0	0	5.69943	3				1	11.4297	0	0	0	5.397	0.308938	1	4	1.65159	3.36533	1.71375	0	0
GH13_42		1		2	0	3.54202	0	2.84971						0	0	0	0	0	0.109972	1	0	1.18067	0	-1.18067	0	na
GH13_5				3	0	0	0	4.27457		1			1	0	6.97963	0	0	5.397	0.136178	0	2	0	2.47533	2.47533	na	0.5
GH13_8	4	4	27	8	19.8191	14.1681	101.558	11.3989	4		2	1	2	15.2395	0	17.0812	20.5605	10.794	0.0880098	35	9	45.1816	12.735	-32.4465	0	0
GH13_9	4	4	4	12	19.8191	14.1681	15.0456	17.0983	2	2	1	2	6	7.61977	13.9593	8.54058	41.121	32.382	0.324069	12	13	16.3442	20.7245	4.38029	0	0
GH130	17	54	28	1	84.231	191.269	105.319	1.42486	35	30	22	1	22	133.346	209.389	187.893	20.5605	118.734	0.446276	99	110	126.94	133.984	7.04486	0	0.05	beta-1,4-mannosylglucose phosphorylase (EC 2.4.1.281); beta-1,4-mannooligosaccharide phosphorylase (EC 2.4.1.319); beta-1,4-mannosyl-N-acetyl-glucosamine phosphorylase (EC 2.4.1.320); beta-1,2-mannobiose phosphorylase (EC 2.4.1.-); beta-1,2-oligomannan phosphorylase (EC 2.4.1.-); beta-1,2-mannosidase (EC 3.2.1.-)
GH133	25	27	63	1	123.869	95.6345	236.968	1.42486	20	8	8		4	76.1977	55.8371	68.3247	0	21.588	0.0134318	115	40	152.157	44.3895	-107.768	0	0	amylo-alpha-1,6-glucosidase (EC 3.2.1.33);
GH136	12	37	73	4	59.4572	131.055	274.582	5.69943	2	2	1		3	7.61977	13.9593	8.54058	0	16.191	0.00996435	122	8	155.031	9.26213	-145.769	0.82	0.38	lacto-N-biosidase (EC 3.2.1.140); Lacto-N-biosidase (Lewis antigen a/b specificity) (EC 3.2.1.-)
GH137				1	0	0	0	1.42486				2	1	0	0	0	41.121	5.397	0.208936	0	3	0	9.30359	9.30359	na	0.33	beta-L-arabinofuranosidase (EC 3.2.1.185)
GH138	1		2	2	4.95476	0	7.52278	2.84971	6	3	2	1	5	22.8593	20.9389	17.0812	20.5605	26.985	0.000315044	3	17	4.15918	21.685	17.5258	0.33	0.35	rhamnogalacturonan alpha-1,2-galacturonohydrolase (EC 3.2.1.173)
GH139	4	6	10	9	19.8191	21.2521	37.6139	12.8237	6	3	2	87	2	22.8593	20.9389	17.0812	1788.76	10.794	0.245777	20	100	26.2284	372.087	345.859	0.25	0.04	alpha-2-O-Me-L-fucosidase (EC 3.2.1.-)
GH140	8	13	23	1	39.6381	46.0462	86.512	1.42486	6	4	1	4	5	22.8593	27.9185	8.54058	82.2419	26.985	0.139955	44	20	57.3988	33.7091	-23.6897	0.55	0.1	beta-1,2-apiosidase (EC 3.2.1.-)
GH141	27	33	117	1	133.779	116.887	440.083	1.42486	11	8	7	1	9	41.9088	55.8371	59.7841	20.5605	48.573	0.0268807	177	36	230.249	45.3327	-184.917	0.77	0.17	alpha-L-fucosidase (EC 3.2.1.51); xylanase (EC 3.2.1.8)
GH142	1	4	4	2	4.95476	14.1681	15.0456	2.84971	2	1	1		7	7.61977	6.97963	8.54058	0	37.779	0.466562	9	11	11.3895	12.1838	0.794336	0.44	0.36	beta-L-arabinofuranosidase (EC 3.2.1.185)
GH143				2	0	0	0	2.84971	2	1	1	1	1	7.61977	6.97963	8.54058	20.5605	5.397	0.0179312	0	6	0	9.81949	9.81949	na	0.83	2-keto-3-deoxy-D-lyxo-heptulosaric acid hydrolase (EC 3.2.1.-)
GH144	4	8	5	1	19.8191	28.3361	18.807	1.42486	11	4	5		3	41.9088	27.9185	42.7029	0	16.191	0.383127	17	23	22.3207	25.7442	3.42353	0.68	0.22	endo-beta-1,2-glucanase (EC 3.2.1.71); beta-1,2-glucooligosaccharide sophorohydrolase (EC 3.2.1.-)
GH145	4	2	4	2	19.8191	7.08403	15.0456	2.84971		1			1	0	6.97963	0	0	5.397	0.00738007	10	2	13.9829	2.47533	-11.5076	0.6	1	L-Rhalpha-alpha-1,4-GlcA alpha-L-rhamnohydrolase (EC 3.2.1.-)
GH146				13	0	0	0	18.5231	2	2				7.61977	13.9593	0	0	0	0.147881	0	4	0	4.31581	4.31581	na	0.25	beta-L-arabinofuranosidase (EC 3.2.1.185)
GH147	1	6		28	4.95476	21.2521	0	39.896	2			1		7.61977	0	0	20.5605	0	0.339131	7	3	8.73562	5.63605	-3.09957	1	0.33	beta-galactosidase (EC 3.2.1.23)
GH149	15	5	16	11	74.3214	17.7101	60.1823	15.6734	7	11	4		4	26.6692	76.776	34.1623	0	21.588	0.200183	36	26	50.7379	31.8391	-18.8988	0	0	beta-1,3-glucan phosphorylase (EC 2.4.1.97)
GH15		3		1	0	10.6261	0	1.42486						0	0	0	0	0	0.109972	3	0	3.54202	0	-3.54202	0	na	glucoamylase (EC 3.2.1.3); glucodextranase (EC 3.2.1.70); alpha,alpha-trehalase (EC 3.2.1.28); dextran dextrinase (EC 2.4.1.2)
GH150	14	56	25	32	69.3667	198.353	94.0348	45.5954		1			1	0	6.97963	0	0	5.397	0.00324762	95	2	120.585	2.47533	-118.109	0.53	0.5	l-carrageenase (EC 3.2.1.-)
GH151		1	1	4	0	3.54202	3.76139	5.69943		1		4	2	0	6.97963	0	82.2419	10.794	0.216904	2	7	2.43447	20.0031	17.5686	1	0.14	alpha-L-fucosidase (EC 3.2.1.51)
GH154	17	7	22	1	84.231	24.7941	82.7506	1.42486	16	8	9		13	60.9582	55.8371	76.8653	0	70.161	0.323578	46	46	63.9252	52.7643	-11.1609	0.35	0.3	beta-glucuronidase (3.2.1.31)
GH156				69	0	0	0	98.3151	1		1	3		3.80989	0	8.54058	61.6814	0	0.191938	0	5	0	14.8064	14.8064	na	0.2	exo-alpha-sialidase (EC 3.2.1.18);
GH158				11	0	0	0	15.6734	10	1	8		8	38.0989	6.97963	68.3247	0	43.176	0.054754	0	27	0	31.3158	31.3158	na	0.26	endo-beta-1,3-glucanase (EC 3.2.1.39)
GH159	2		3	12	9.90953	0	11.2842	17.0983		2			1	0	13.9593	0	0	5.397	0.250946	5	3	7.06457	3.87125	-3.19331	1	0.67	beta-D-galactofuranosidase (EC 3.2.1.146)
GH16	1	2		21	4.95476	7.08403	0	29.922					1	0	0	0	0	5.397	0.106185	3	1	4.01293	1.0794	-2.93353	0.33	0	xyloglucan:xyloglucosyltransferase (EC 2.4.1.207); keratan-sulfate endo-1,4-beta-galactosidase (EC 3.2.1.103); endo-1,3-beta-glucanase / laminarinase (EC 3.2.1.39); endo-1,3(4)-beta-glucanase (EC 3.2.1.6); licheninase (EC 3.2.1.73); beta-agarase (EC 3.2.1.81); kappa;-carrageenase (EC 3.2.1.83); xyloglucanase (EC 3.2.1.151); endo-beta-1,3-galactanase (EC 3.2.1.181); [retaining] beta-porphyranase (…
GH16_1	3	15	10	17	14.8643	53.1303	37.6139	24.2226	9	6	3		1	34.289	41.8778	25.6218	0	5.397	0.174038	28	19	35.2028	21.4371	-13.7657	0.79	0.26
GH16_10	1			3	4.95476	0	0	4.27457	1	1				3.80989	6.97963	0	0	0	0.414239	1	2	1.65159	2.1579	0.506316	0	1
GH16_11	37	67	195	1	183.326	237.315	733.472	1.42486		2			1	0	13.9593	0	0	5.397	0.012361	299	3	384.704	3.87125	-380.833	0.87	0.67
GH16_12	13	8	16	3	64.4119	28.3361	60.1823	4.27457		4		3		0	27.9185	0	61.6814	0	0.0602137	37	7	50.9768	17.92	-33.0568	0.8	0.14	beta-porphyranase (EC 3.2.1.178)
GH16_13	8	19	22	2	39.6381	67.2983	82.7506	2.84971	22	18	8	3	9	83.8175	125.633	68.3247	61.6814	48.573	0.249218	49	60	63.229	77.606	14.377	0.82	0.43
GH16_14	14	9	33	1	69.3667	31.8782	124.126	1.42486	10	5	2		5	38.0989	34.8982	17.0812	0	26.985	0.0269016	56	22	75.1236	23.4126	-51.711	0.88	0.64	agarase
GH16_15			1	5	0	0	3.76139	7.12428						0	0	0	0	0	0.109972	1	0	1.2538	0	-1.2538	0	na
GH16_16	2	4	1	4	9.90953	14.1681	3.76139	5.69943						0	0	0	0	0	0.00282198	7	0	9.27966	0	-9.27966	0	na
GH16_17	4	2	3	1	19.8191	7.08403	11.2842	1.42486						0	0	0	0	0	0.00174779	9	0	12.7291	0	-12.7291	0.11	na
GH16_18	1			5	4.95476	0	0	7.12428						0	0	0	0	0	0.109972	1	0	1.65159	0	-1.65159	0	na
GH16_2				1	0	0	0	1.42486	2				1	7.61977	0	0	0	5.397	0.138401	0	3	0	2.60336	2.60336	na	0.67
GH16_21	1	5	11	7	4.95476	17.7101	41.3753	9.974	3	3	1		3	11.4297	20.9389	8.54058	0	16.191	0.159019	17	10	21.3467	11.42	-9.92669	0.71	0.5	β-glycosidase (EC 3.2.1.-);endo-β-1,3(4)-glucanase / lichenase-laminarinase (EC 3.2.1.6);lichenase / endo-β-1,3-1,4-glucanase (EC 3.2.1.73)
GH16_24				6	0	0	0	8.54914			1			0	0	8.54058	0	0	0.240809	0	1	0	1.70812	1.70812	0	1
GH16_3	9	10	13	14	44.5929	35.4202	48.8981	19.948	16	5	9		1	60.9582	34.8982	76.8653	0	5.397	0.364701	32	31	42.9704	35.6237	-7.34666	0.32	0.55	endo-β-1,4-galactosidase (EC 3.2.1.-);β-glucosidase (EC 3.2.1.21);endo-β-1,3-glucanase / laminarinase (EC 3.2.1.39); endo-β-1,3(4)-glucanase / lichenase-laminarinase (EC 3.2.1.6);lichenase / endo-β-1,3-1,4-glucanase (EC 3.2.1.73)
GH16_4			1	2	0	0	3.76139	2.84971						0	0	0	0	0	0.109972	1	0	1.2538	0	-1.2538	1	na
GH161	2		5	14	9.90953	0	18.807	19.948		4		2	2	0	27.9185	0	41.121	10.794	0.299229	7	8	9.57216	15.9667	6.39454	0	0	beta-1,3-glucan phosphorylase (EC 2.4.1.-)
GH163	4	5	3	2	19.8191	17.7101	11.2842	2.84971	15	12	7		7	57.1483	83.7556	59.7841	0	37.779	0.0722536	12	41	16.2711	47.6934	31.4223	0.33	0.54	endo-beta-N-acetylglucosaminidase cleaving GlcNAc-beta-1,2-Man (EC 3.2.1.-)
GH164	3		4	72	14.8643	0	15.0456	102.59					1	0	0	0	0	5.397	0.0317911	7	1	9.96995	1.0794	-8.89055	0.13	0	beta-mannosidase (EC 3.2.1.25)
GH165	8	14	8	9	39.6381	49.5882	30.0911	12.8237						0	0	0	0	0	3.49429e-05	30	0	39.7725	0	-39.7725	0.73	na	beta-galactosidase (EC 3.2.1.23)
GH166		1		2	0	3.54202	0	2.84971			1		1	0	0	8.54058	0	5.397	0.273818	1	2	1.18067	2.78752	1.60685	0	0	alpha-1,4-galactosaminogalactan hydrolase (EC 3.2.1.-)
GH167	25	56	44	5	123.869	198.353	165.501	7.12428	3	3			4	11.4297	20.9389	0	0	21.588	5.45057e-05	125	10	162.574	10.7913	-151.783	0.46	0.2	beta-carrageenase (EC 3.2.1.-)
GH168	5	1	7	0	24.7738	3.54202	26.3297	0	0	0	0	0	0	0	0	0	0	0	0.00730763	13	0	18.2152	0	-18.2152	0.77	na
GH17				1	0	0	0	1.42486				7	1	0	0	0	143.923	5.397	0.231168	0	8	0	29.8641	29.8641	na	0	glucan endo-1,3-beta-glucosidase (EC 3.2.1.39); licheninase (EC 3.2.1.73); ABA-specific beta-glucosidase (EC 3.2.1.175); beta-1,3-glucanosyltransglycosylase (EC 2.4.1.-); beta-1,3-glucosidase (EC 3.2.1.-)
GH170	12	12	8		59.4572	42.5042	30.0911	0	12	4	16	1	10	45.7186	27.9185	136.649	20.5605	53.97	0.332395	32	43	44.0175	56.9634	12.9459	0	0
GH171	23	59	48	7	113.96	208.979	180.547	9.974	57	35	17	3	16	217.164	244.287	145.19	61.6814	86.3521	0.37739	130	128	167.828	150.935	-16.8936	0.72	0.49
GH18	63	47	40	3	312.15	166.475	150.456	4.27457	40	22	11		35	152.395	153.552	93.9464	0	188.895	0.0820295	150	108	209.694	117.758	-91.9357	0.38	0.29	chitinase (EC 3.2.1.14); lysozyme (EC 3.2.1.17); endo-beta-N-acetylglucosaminidase (EC 3.2.1.96); peptidoglycan hydrolase with endo-beta-N-acetylglucosaminidase specificity (EC 3.2.1.-); Nod factor hydrolase (EC 3.2.1.-); xylanase inhibitor; concanavalin B; narbonin
GH19	25	14	20	1	123.869	49.5882	75.2278	1.42486			1	53	2	0	0	8.54058	1089.71	10.794	0.324306	59	56	82.8951	221.808	138.913	0.66	0	chitinase (EC 3.2.1.14); lysozyme (EC 3.2.1.17)
GH2	333	497	891	2	1649.94	1760.38	3351.4	2.84971	326	226	135	5	227	1242.02	1577.4	1152.98	102.802	1225.12	0.0311032	1721	919	2253.91	1060.06	-1193.84	0.54	0.24	beta-galactosidase (EC 3.2.1.23) ; beta-mannosidase (EC 3.2.1.25); beta-glucuronidase (EC 3.2.1.31); alpha-L-arabinofuranosidase (EC 3.2.1.55); mannosylglycoprotein endo-beta-mannosidase (EC 3.2.1.152); exo-beta-glucosaminidase (EC 3.2.1.165); alpha-L-arabinopyranosidase (EC 3.2.1.-); beta-galacturonidase (EC 3.2.1.-); beta-xylosidase (EC 3.2.1.37); beta-D-galactofuranosidase (EC 3.2.1.146);
GH20	76	69	64	1	376.562	244.399	240.729	1.42486	90	44	35	20	21	342.89	307.104	298.92	411.21	113.337	0.461272	209	210	287.23	294.692	7.46206	0.6	0.44	beta-hexosaminidase (EC 3.2.1.52); lacto-N-biosidase (EC 3.2.1.140); beta-1,6-N-acetylglucosaminidase (EC 3.2.1.-); beta-6-SO3-N-acetylglucosaminidase (EC 3.2.1.-)
GH23	120	141	195	1	594.572	499.424	733.472	1.42486	194	86	85	4	116	739.118	600.248	725.95	82.2419	626.052	0.379175	456	485	609.156	554.722	-54.4337	0.52	0.33	lysozyme type G (EC 3.2.1.17); peptidoglycan lyase (EC 4.2.2.n1) also known in the literature as peptidoglycan lytic transglycosylase; chitinase (EC 3.2.1.14)
GH24	4	22	16	2	19.8191	77.9244	60.1823	2.84971	19	4	4	34	7	72.3878	27.9185	34.1623	699.056	37.779	0.25733	42	68	52.6419	174.261	121.619	0.04	0.16	lysozyme (EC 3.2.1.17)
GH25	33	33	26	1	163.507	116.887	97.7962	1.42486	125	71	62	14	123	476.236	495.554	529.516	287.847	663.831	0.00214108	92	395	126.063	490.597	364.534	0.13	0.31	lysozyme (EC 3.2.1.17)
GH26	36	127	47	1	178.371	449.836	176.785	1.42486	51	28	31	4	25	194.304	195.43	264.758	82.2419	134.925	0.136806	210	139	268.331	174.332	-93.9992	0.79	0.46	beta-mannanase (EC 3.2.1.78); exo-beta-1,4-mannobiohydrolase (EC 3.2.1.100); beta-1,3-xylanase (EC 3.2.1.32); lichenase / endo-beta-1,3-1,4-glucanase (EC 3.2.1.73); mannobiose-producing exo-beta-mannanase (EC 3.2.1.-)
GH27	13	27	15	2	64.4119	95.6345	56.4209	2.84971	40	19	10	18	24	152.395	132.613	85.4058	370.089	129.528	0.0911358	55	111	72.1558	174.006	101.85	0.63	0.19	alpha-galactosidase (EC 3.2.1.22); alpha-N-acetylgalactosaminidase (EC 3.2.1.49); isomalto-dextranase (EC 3.2.1.94); beta-L-arabinopyranosidase (EC 3.2.1.88); galactan:galactan galactosyltransferase (EC 2.4.1.-)
GH28	34	27	86	1	168.462	95.6345	323.48	1.42486	84	70	58	8	65	320.03	488.574	495.354	164.484	350.805	0.0638922	147	285	195.859	363.85	167.991	0.7	0.36	polygalacturonase (EC 3.2.1.15); exo-polygalacturonase (EC 3.2.1.67); exo-polygalacturonosidase (EC 3.2.1.82); rhamnogalacturonase (EC 3.2.1.171); rhamnogalacturonan alpha-1,2-galacturonohydrolase (EC 3.2.1.173); xylogalacturonan hydrolase (EC 3.2.1.-)
GH29	72	172	339	25	356.743	609.227	1275.11	35.6214	99	49	31	69	29	377.179	342.002	264.758	1418.67	156.513	0.2721	583	277	747.027	511.825	-235.202	0.68	0.29	alpha-L-fucosidase (EC 3.2.1.51); alpha-1,3/1,4-L-fucosidase (EC 3.2.1.111)
GH3	86	113	177	4	426.11	400.248	665.766	5.69943	315	215	156		226	1200.11	1500.62	1332.33	0	1219.72	0.0889992	376	912	497.375	1050.56	553.183	0.42	0.39	β-glucosidase (EC 3.2.1.21); xylan 1,4-β-xylosidase (EC 3.2.1.37); β-glucosylceramidase (EC 3.2.1.45); β-N-acetylhexosaminidase (EC 3.2.1.52); α-L-arabinofuranosidase (EC 3.2.1.55); glucan 1,4-β-glucosidase (EC 3.2.1.74); isoprimeverose-producing oligoxyloglucan hydrolase (EC 3.2.1.120); coniferin β-glucosidase (EC 3.2.1.126); exo-1,3-1,4-glucanase (EC 3.2.1.-); β-N-acetylglucosaminide phosphoryl…
GH30		1	4	3	0	3.54202	15.0456	4.27457	1	2	1	12	2	3.80989	13.9593	8.54058	246.726	10.794	0.227893	5	18	6.19586	56.7659	50.57	0.71	0.06	endo-beta-1,4-xylanase (EC 3.2.1.8); beta-glucosidase (3.2.1.21); beta-glucuronidase (EC 3.2.1.31); beta-xylosidase (EC 3.2.1.37); beta-fucosidase (EC 3.2.1.38); glucosylceramidase (EC 3.2.1.45); beta-1,6-glucanase (EC 3.2.1.75); glucuronoarabinoxylan endo-beta-1,4-xylanase (EC 3.2.1.136); endo-beta-1,6-galactanase (EC:3.2.1.164); [reducing end] beta-xylosidase (EC 3.2.1.-)
GH30_1	40	15	88	1	198.191	53.1303	331.003	1.42486	46	30	22		22	175.255	209.389	187.893	0	118.734	0.248258	143	120	194.108	138.254	-55.8536	0.64	0.47
GH30_2	3		1	5	14.8643	0	3.76139	7.12428				3		0	0	0	61.6814	0	0.36366	4	3	6.20856	12.3363	6.12773	0	na
GH30_3		4	3	2	0	14.1681	11.2842	2.84971	2		2		1	7.61977	0	17.0812	0	5.397	0.327625	7	5	8.48408	6.01959	-2.46449	1	0.2
GH30_4		3	3	4	0	10.6261	11.2842	5.69943	2				1	7.61977	0	0	0	5.397	0.110721	6	3	7.30341	2.60336	-4.70005	0.83	0.67
GH30_7	1				4.95476	0	0	0		1				0	6.97963	0	0	0	0.455995	1	1	1.65159	1.39593	-0.255661	0	0
GH30_8			1		0	0	3.76139	0		1		26		0	6.97963	0	534.572	0	0.239865	1	27	1.2538	108.31	107.057	1	0
GH31	59	43	115		292.331	152.307	432.56	0	149	65	61	19	80	567.673	453.676	520.976	390.649	431.76	0.0237451	217	374	292.399	472.947	180.548	0.26	0.26	alpha-glucosidase (EC 3.2.1.20); alpha-galactosidase (EC 3.2.1.22); alpha-mannosidase (EC 3.2.1.24); alpha-1,3-glucosidase (EC 3.2.1.84); sucrase-isomaltase (EC 3.2.1.48) (EC 3.2.1.10); alpha-xylosidase (EC 3.2.1.177); alpha-glucan lyase (EC 4.2.2.13); isomaltosyltransferase (EC 2.4.1.-); oligosaccharide alpha-1,4-glucosyltransferase (EC 2.4.1.161); sulfoquinovosidase (EC 3.2.1.-); alpha-N-acetyl…
GH32	34	21	15		168.462	74.3824	56.4209	0	97	31	74	3	64	369.559	216.369	632.003	61.6814	345.408	0.0647724	70	269	99.7551	325.004	225.249	0.18	0.29	invertase (EC 3.2.1.26); endo-inulinase (EC 3.2.1.7); beta-2,6-fructan 6-levanbiohydrolase (EC 3.2.1.64); endo-levanase (EC 3.2.1.65); exo-inulinase (EC 3.2.1.80); fructan beta-(2,1)-fructosidase/1-exohydrolase (EC 3.2.1.153); fructan beta-(2,6)-fructosidase/6-exohydrolase (EC 3.2.1.154); sucrose:sucrose 1-fructosyltransferase (EC 2.4.1.99); fructan:fructan 1-fructosyltransferase (EC 2.4.1.100); …
GH33	41	19	60		203.145	67.2983	225.684	0	40	30	19	6	10	152.395	209.389	162.271	123.363	53.97	0.315896	120	105	165.376	140.278	-25.098	0.63	0.36	sialidase or neuraminidase (EC 3.2.1.18); trans-sialidase (EC 2.4.1.-); anhydrosialidase (EC 4.2.2.15); Kdo hydrolase (EC 3.2.1.-); 2-keto-3-deoxynononic acid hydrolase / KDNase (EC 3.2.1.-)
GH35	1	15	6		4.95476	53.1303	22.5684	0	28	19	22	17	33	106.677	132.613	187.893	349.528	178.101	0.014392	22	119	26.8845	190.962	164.078	0.36	0.18	beta-galactosidase (EC 3.2.1.23); exo-beta-glucosaminidase (EC 3.2.1.165); exo-beta-1,4-galactanase (EC 3.2.1.-); beta-1,3-galactosidase (EC 3.2.1.-)
GH36	67	64	53		331.969	226.689	199.354	0	78	46	30		79	297.171	321.063	256.218	0	426.363	0.47106	184	233	252.671	260.163	7.49235	0.19	0.14	alpha-galactosidase (EC 3.2.1.22); alpha-N-acetylgalactosaminidase (EC 3.2.1.49); stachyose synthase (EC 2.4.1.67); raffinose synthase (EC 2.4.1.82)
GH37	4		1		19.8191	0	3.76139	0	1	5			4	3.80989	34.8982	0	0	21.588	0.348794	5	10	7.86015	12.0592	4.19907	0.83	0.2	alpha,alpha-trehalase (EC 3.2.1.28).
GH38	20	11	9		99.0953	38.9622	33.8525	0	25	25	1	1	12	95.2472	174.491	8.54058	20.5605	64.764	0.364864	40	64	57.3033	72.7206	15.4173	0	0.09	alpha-mannosidase (EC 3.2.1.24); mannosyl-oligosaccharide alpha-1,2-mannosidase (EC 3.2.1.113); mannosyl-oligosaccharide alpha-1,3-1,6-mannosidase (EC 3.2.1.114); alpha-2-O-mannosylglycerate hydrolase (EC 3.2.1.170); mannosyl-oligosaccharide alpha-1,3-mannosidase (EC 3.2.1.-)
GH39	28	35	47		138.733	123.971	176.785	0	3	13			15	11.4297	90.7352	0	0	80.9551	0.00479647	110	31	146.496	36.624	-109.872	0.62	0.19	alpha-L-iduronidase (EC 3.2.1.76); beta-xylosidase (EC 3.2.1.37); alpha-L-arabinofuranosidase (EC 3.2.1.55); beta-glucosidase (EC 3.2.1.21); beta-galactosidase (EC 3.2.1.23)
GH4	38	28	6		188.281	99.1765	22.5684	0	12	8	5	1	14	45.7186	55.8371	42.7029	20.5605	75.5581	0.0927034	72	40	103.342	48.0754	-55.2665	0	0	maltose-6-phosphate glucosidase (EC 3.2.1.122); alpha-glucosidase (EC 3.2.1.20); alpha-galactosidase (EC 3.2.1.22); 6-phospho-beta-glucosidase (EC 3.2.1.86); alpha-glucuronidase (EC 3.2.1.139); alpha-galacturonase (EC 3.2.1.67); palatinase (EC 3.2.1.-)
GH42	3	1	2		14.8643	3.54202	7.52278	0	4	6			1	15.2395	41.8778	0	0	5.397	0.365897	6	11	8.64303	12.5029	3.85984	0	0.36	beta-galactosidase (EC 3.2.1.23); alpha-L-arabinopyranosidase (EC 3.2.1.-)
GH43	1		2		4.95476	0	7.52278	0		1		14		0	6.97963	0	287.847	0	0.249875	3	15	4.15918	58.9653	54.8061	0.67	0.07	beta-xylosidase (EC 3.2.1.37); alpha-L-arabinofuranosidase (EC 3.2.1.55); xylanase (EC 3.2.1.8); alpha-1,2-L-arabinofuranosidase (EC 3.2.1.-); exo-alpha-1,5-L-arabinofuranosidase (EC 3.2.1.-); [inverting] exo-alpha-1,5-L-arabinanase (EC 3.2.1.-); beta-1,3-xylosidase (EC 3.2.1.-); [inverting] exo-alpha-1,5-L-arabinanase (EC 3.2.1.-); [inverting] endo-alpha-1,5-L-arabinanase (EC 3.2.1.99); exo-beta…
GH43_1	44	72	115		218.01	255.025	432.56	0	67	38	38	26	60	255.262	265.226	324.542	534.572	323.82	0.328182	231	229	301.865	340.685	38.8197	0.74	0.31
GH43_10	54	100	134		267.557	354.202	504.027	0	110	59	62	1	73	419.088	411.798	529.516	20.5605	393.981	0.438927	288	305	375.262	354.989	-20.273	0.7	0.25
GH43_11	1	1	2		4.95476	3.54202	7.52278	0		1	1		1	0	6.97963	8.54058	0	5.397	0.331213	4	3	5.33985	4.18344	-1.15641	0	0.33
GH43_12			1		0	0	3.76139	0		1		2		0	6.97963	0	41.121	0	0.231863	1	3	1.2538	9.62012	8.36632	0	0.33
GH43_16	4		7		19.8191	0	26.3297	0	13	10	7	3	7	49.5285	69.7963	59.7841	61.6814	37.779	0.00252757	11	40	15.3829	55.7139	40.331	0.36	0.23
GH43_17	4	4	4		19.8191	14.1681	15.0456	0	13	7	6	6	17	49.5285	48.8574	51.2435	123.363	91.7491	0.0150588	12	49	16.3442	72.9483	56.6041	0.5	0.29
GH43_18		2			0	7.08403	0	0	16	6	8	3	18	60.9582	41.8778	68.3247	61.6814	97.1461	0.000933665	2	51	2.36134	65.9976	63.6363	0	0.27
GH43_19	3	2	5		14.8643	7.08403	18.807	0	9	5	11		5	34.289	34.8982	93.9464	0	26.985	0.140525	10	30	13.5851	38.0237	24.4386	0.8	0.5
GH43_2	3		2		14.8643	0	7.52278	0	2	4	2			7.61977	27.9185	17.0812	0	0	0.354279	5	8	7.46236	10.5239	3.06154	0.17	0.25
GH43_20					0	0	0	0	1					3.80989	0	0	0	0	0.240809	0	1	0	0.761977	0.761977	na	0
GH43_24			1		0	0	3.76139	0		1	1		2	0	6.97963	8.54058	0	10.794	0.122706	1	4	1.2538	5.26285	4.00905	0	0.25
GH43_26	3	1			14.8643	3.54202	0	0	2	4	1		2	7.61977	27.9185	8.54058	0	10.794	0.256511	4	9	6.13544	10.9746	4.83914	0	0.33
GH43_28					0	0	0	0	1			3	1	3.80989	0	0	61.6814	5.397	0.203415	0	5	0	14.1777	14.1777	na	0
GH43_29			1		0	0	3.76139	0	2	2	1	6	2	7.61977	13.9593	8.54058	123.363	10.794	0.167977	1	13	1.2538	32.8553	31.6015	0	0.23
GH43_3					0	0	0	0	27	8	16		16	102.867	55.8371	136.649	0	86.3521	0.0240123	0	67	0	76.3411	76.3411	na	0.25
GH43_31					0	0	0	0	1	1				3.80989	6.97963	0	0	0	0.147881	0	2	0	2.1579	2.1579	na	0.5
GH43_34		1			0	3.54202	0	0						0	0	0	0	0	0.109972	1	0	1.18067	0	-1.18067	0	na
GH43_35					0	0	0	0	1	2				3.80989	13.9593	0	0	0	0.181166	0	3	0	3.55383	3.55383	na	0.33
GH43_4					0	0	0	0	2	1			2	7.61977	6.97963	0	0	10.794	0.0649877	0	5	0	5.07868	5.07868	na	0.4
GH43_9	1				4.95476	0	0	0				1		0	0	0	20.5605	0	0.338258	1	1	1.65159	4.1121	2.46051	0	na
GH44		8			0	28.3361	0	0		2		3		0	13.9593	0	61.6814	0	0.377263	8	5	9.44538	15.1281	5.68276	0.88	0.4	endoglucanase (EC 3.2.1.4); xyloglucanase (EC 3.2.1.151)
GH45					0	0	0	0		3				0	20.9389	0	0	0	0.240809	0	3	0	4.18778	4.18778	na	0.67	endoglucanase (EC 3.2.1.4); xyloglucan-specific endo-beta-1,4-glucanase / endo-xyloglucanase (EC 3.2.1.151); endo-beta-1,4-mannanase (EC 3.2.1.78)
GH47	1	1			4.95476	3.54202	0	0						0	0	0	0	0	0.0194865	2	0	2.83226	0	-2.83226	0	na	alpha-mannosidase (EC 3.2.1.113)
GH48		3			0	10.6261	0	0						0	0	0	0	0	0.109972	3	0	3.54202	0	-3.54202	0	na	reducing end-acting cellobiohydrolase (EC 3.2.1.176); endo-beta-1,4-glucanase (EC 3.2.1.4); chitinase (EC 3.2.1.14)
GH49		5	21		0	17.7101	78.9892	0						0	0	0	0	0	0.05734	26	0	32.2331	0	-32.2331	0.77	na	dextranase (EC 3.2.1.11); isopullulanase (EC 3.2.1.57); dextran 1,6-alpha-isomaltotriosidase (EC 3.2.1.95); sulfated arabinan endo-1,4-beta-L-arabinanase (EC 3.2.1.-)
GH5		2	2		0	7.08403	7.52278	0	15	4	3		5	57.1483	27.9185	25.6218	0	26.985	0.0562983	4	27	4.86894	27.5347	22.6658	0.25	0.41	endo-beta-1,4-glucanase / cellulase (EC 3.2.1.4); endo-beta-1,4-xylanase (EC 3.2.1.8); beta-glucosidase (EC 3.2.1.21); beta-mannosidase (EC 3.2.1.25); beta-glucosylceramidase (EC 3.2.1.45); glucan beta-1,3-glucosidase (EC 3.2.1.58); exo-beta-1,4-glucanase / cellodextrinase (EC 3.2.1.74); glucan endo-1,6-beta-glucosidase (EC 3.2.1.75); mannan endo-beta-1,4-mannosidase (EC 3.2.1.78); cellulose beta…
GH5_1	6	29	6		29.7286	102.718	22.5684	0	16	20	2	1	16	60.9582	139.593	17.0812	20.5605	86.3521	0.361325	41	55	51.6718	64.9089	13.2371	0.69	0.33
GH5_10		7			0	24.7941	0	0		1				0	6.97963	0	0	0	0.159281	7	1	8.26471	1.39593	-6.86878	0.86	1
GH5_12					0	0	0	0					1	0	0	0	0	5.397	0.240809	0	1	0	1.0794	1.0794	na	0
GH5_13		5	6		0	17.7101	22.5684	0		3			2	0	20.9389	0	0	10.794	0.191335	11	5	13.4261	6.34658	-7.07957	0.73	0.4
GH5_14		2			0	7.08403	0	0	6	5	5		6	22.8593	34.8982	42.7029	0	32.382	0.0255881	2	22	2.36134	26.5685	24.2071	0	0.14
GH5_15					0	0	0	0					1	0	0	0	0	5.397	0.240809	0	1	0	1.0794	1.0794	na	0
GH5_18		1			0	3.54202	0	0		1				0	6.97963	0	0	0	0.459923	1	1	1.18067	1.39593	0.215254	0	0
GH5_19	2	5			9.90953	17.7101	0	0	7	3	3	5	2	26.6692	20.9389	25.6218	102.802	10.794	0.128151	7	20	9.20654	37.3653	28.1587	0.86	0.15
GH5_2	18	39	15		89.1857	138.139	56.4209	0	14	7	9	5	22	53.3384	48.8574	76.8653	102.802	118.734	0.292793	72	57	94.5818	80.1195	-14.4622	0.75	0.44
GH5_21					0	0	0	0	6	3	9	3	6	22.8593	20.9389	76.8653	61.6814	32.382	0.0140227	0	27	0	42.9454	42.9454	na	0.15
GH5_22	7	8	9		34.6833	28.3361	33.8525	0	17	12	4	4	11	64.7681	83.7556	34.1623	82.2419	59.367	0.0181524	24	48	32.2907	64.859	32.5683	0.75	0.42
GH5_25	5	16	4		24.7738	56.6723	15.0456	0	29	13	14		21	110.487	90.7352	119.568	0	113.337	0.064343	25	77	32.1639	86.8254	54.6616	0.52	0.48
GH5_29			1		0	0	3.76139	0						0	0	0	0	0	0.109972	1	0	1.2538	0	-1.2538	1	na
GH5_30	2	1			9.90953	3.54202	0	0		1				0	6.97963	0	0	0	0.157678	3	1	4.48385	1.39593	-3.08792	0.67	1
GH5_37		1			0	3.54202	0	0						0	0	0	0	0	0.109972	1	0	1.18067	0	-1.18067	0	na
GH5_4					0	0	0	0	3		2	3		11.4297	0	17.0812	61.6814	0	0.140128	0	8	0	18.0385	18.0385	na	0.13	β-glycosidase (EC 3.2.1.-);glucomannan-specific endo-β-1,4-glucanase (EC 3.2.1.-);[retaining] exo-xyloglucanase (EC 3.2.1.-);xyloglucan-specific endo-β-1,4-glucanase / endo-xyloglucanase (EC 3.2.1.151);endo-β-1,4-glucanase (EC 3.2.1.4);endo-β-1,3(4)-glucanase / lichenase-laminarinase (EC 3.2.1.6);lichenase / endo-β-1,3-1,4-glucanase (EC 3.2.1.73);endo-β-1,4-xylanase (EC 3.2.1.8)
GH5_41	3	24	15		14.8643	85.0084	56.4209	0	8	3	7		4	30.4791	20.9389	59.7841	0	21.588	0.121299	42	22	52.0979	26.558	-25.5398	0.87	0.36
GH5_55					0	0	0	0	1					3.80989	0	0	0	0	0.240809	0	1	0	0.761977	0.761977	na	1
GH5_7	1	1	4		4.95476	3.54202	15.0456	0	6	3				22.8593	20.9389	0	0	0	0.454408	6	9	7.84745	8.75964	0.912194	0	0.22
GH50	20	31	35		99.0953	109.803	131.649	0	1			29	1	3.80989	0	0	596.254	5.397	0.481718	86	31	113.516	121.092	7.57665	0.5	0.03	beta-agarase (EC 3.2.1.81).
GH51	1	16	1		4.95476	56.6723	3.76139	0	91	48	47		68	346.7	335.022	401.407	0	366.996	0.0173514	18	254	21.7961	290.025	268.229	0.74	0.21	endoglucanase (EC 3.2.1.4); endo-beta-1,4-xylanase (EC 3.2.1.8); beta-xylosidase (EC 3.2.1.37); alpha-L-arabinofuranosidase (EC 3.2.1.55); lichenase / endo-beta-1,3-1,4-glucanase (EC 3.2.1.73)
GH52	4		2		19.8191	0	7.52278	0				13		0	0	0	267.286	0	0.278705	6	13	9.11395	53.4572	44.3433	0	na	beta-xylosidase (EC 3.2.1.37).
GH53		15	2		0	53.1303	7.52278	0	49	22	36		25	186.684	153.552	307.461	0	134.925	0.0438378	17	132	20.2177	156.525	136.307	0.71	0.4	endo-beta-1,4-galactanase (EC 3.2.1.89).
GH54					0	0	0	0	4	2				15.2395	13.9593	0	0	0	0.133628	0	6	0	5.83976	5.83976	na	0.5	alpha-L-arabinofuranosidase (EC 3.2.1.55); beta-xylosidase (EC 3.2.1.37).
GH55	3		1		14.8643	0	3.76139	0		9			3	0	62.8167	0	0	16.191	0.291558	4	12	6.20856	15.8015	9.59298	0.25	0.42	exo-beta-1,3-glucanase (EC 3.2.1.58); endo-beta-1,3-glucanase (EC 3.2.1.39)
GH56			1		0	0	3.76139	0				9		0	0	0	185.044	0	0.248023	1	9	1.2538	37.0089	35.7551	0.5	na	hyaluronidase (EC 3.2.1.35); chondroitin hydrolase (EC 3.2.1.-)
GH57	18	47	67		89.1857	166.475	252.013	0	73	32	25		42	278.122	223.348	213.515	0	226.674	0.40128	132	172	169.225	188.332	19.1071	0	0	alpha-amylase (EC 3.2.1.1); alpha-galactosidase (EC 3.2.1.22); amylopullulanase (EC 3.2.1.41); cyclomaltodextrinase (EC 3.2.1.54); branching enzyme (EC 2.4.1.18); 4-alpha-glucanotransferase (EC 2.4.1.25)
GH59					0	0	0	0		2		6		0	13.9593	0	123.363	0	0.213001	0	8	0	27.4644	27.4644	na	0	beta-galactosidase (EC 3.2.1.23); galactocerebrosidase (EC 3.2.1.46)
GH63	9	8	6		44.5929	28.3361	22.5684	0		1	3		1	0	6.97963	25.6218	0	5.397	0.0111399	23	5	31.8325	7.59968	-24.2328	0.56	0.4	processing alpha-glucosidase (EC 3.2.1.106); alpha-1,3-glucosidase (EC 3.2.1.84); alpha-glucosidase (EC 3.2.1.20); mannosylglycerate alpha-mannosidase / mannosylglycerate hydrolase (EC 3.2.1.170); glucosylglycerate hydrolase (EC 3.2.1.208)
GH64					0	0	0	0		2		2		0	13.9593	0	41.121	0	0.170685	0	4	0	11.016	11.016	na	0.25	beta-1,3-glucanase (EC 3.2.1.39)
GH65	10	17	10		49.5476	60.2143	37.6139	0	8	9	3	1	8	30.4791	62.8167	25.6218	20.5605	43.176	0.151117	37	29	49.1253	36.5308	-12.5945	0.03	0.03	alpha,alpha-trehalase (EC 3.2.1.28); maltose phosphorylase (EC 2.4.1.8); trehalose phosphorylase (EC 2.4.1.64); kojibiose phosphorylase (EC 2.4.1.230); trehalose-6-phosphate phosphorylase (EC 2.4.1.216); nigerose phosphorylase (EC 2.4.1.279); 3-O-alpha-glucopyranosyl-L-rhamnose phosphorylase (EC 2.4.1.282); 2-O-alpha-glucopyranosylglycerol: phosphate beta-glucosyltransferase (EC 2.4.1.-); alpha-g…
GH66					0	0	0	0	1		2	6	1	3.80989	0	17.0812	123.363	5.397	0.188475	0	10	0	29.9302	29.9302	na	0.3	cycloisomaltooligosaccharide glucanotransferase (EC 2.4.1.248); dextranase (EC 3.2.1.11).
GH67	2				9.90953	0	0	0	17	11	13	4	12	64.7681	76.776	111.028	82.2419	64.764	0.000286661	2	57	3.30318	79.9155	76.6123	1	0.33	alpha-glucuronidase (EC 3.2.1.139); xylan alpha-1,2-glucuronidase (EC 3.2.1.131)
GH73	61	87	103		302.241	308.155	387.423	0	72	27	38		40	274.312	188.45	324.542	0	215.88	0.0677614	251	177	332.606	200.637	-131.97	0.61	0.29	lysozyme (EC 3.2.1.17); mannosyl-glycoprotein endo-beta-N-acetylglucosaminidase (EC 3.2.1.96); peptidoglycan hydrolase with endo-beta-N-acetylglucosaminidase specificity (EC 3.2.1.-)
GH74	6	6	17		29.7286	21.2521	63.9437	0	12		1		1	45.7186	0	8.54058	0	5.397	0.0636817	29	14	38.3081	11.9312	-26.3769	0.03	0.21	endoglucanase (EC 3.2.1.4); oligoxyloglucan reducing end-specific cellobiohydrolase (EC 3.2.1.150); xyloglucanase (EC 3.2.1.151)
GH76	2		3		9.90953	0	11.2842	0	4	15	9	15	4	15.2395	104.695	76.8653	308.407	21.588	0.108719	5	47	7.06457	105.359	98.2943	1	0.3	alpha-1,6-mannanase (EC 3.2.1.101); alpha-glucosidase (EC 3.2.1.20)
GH77	86	94	144		426.11	332.95	541.64	0	80	57	21	6	75	304.791	397.839	179.352	123.363	404.775	0.0674099	324	239	433.567	282.024	-151.542	0.01	0	amylomaltase or 4-alpha-glucanotransferase (EC 2.4.1.25)
GH78	40	23	56		198.191	81.4664	210.638	0	39	45	14		19	148.586	314.084	119.568	0	102.543	0.366691	119	117	163.432	136.956	-26.4756	0.36	0.22	alpha-L-rhamnosidase (EC 3.2.1.40); rhamnogalacturonan alpha-L-rhamnohydrolase (EC 3.2.1.174); L-Rhap-alpha-1,3-D-Apif -specific alpha-1,3-L-rhamnosidase (EC 3.2.1.-)
GH79					0	0	0	0				10	1	0	0	0	205.605	5.397	0.234019	0	11	0	42.2004	42.2004	na	0.09	beta-glucuronidase (EC 3.2.1.31); hyaluronoglucuronidase (EC 3.2.1.36); heparanase (EC 3.2.1.166); baicalin beta-glucuronidase (EC 3.2.1.167); beta-4-O-methyl-glucuronidase (EC 3.2.1.-)
GH8	1	9			4.95476	31.8782	0	0	9	12	11		10	34.289	83.7556	93.9464	0	53.97	0.0681776	10	42	12.2776	53.1922	40.9146	0.5	0.5	chitosanase (EC 3.2.1.132); cellulase (EC 3.2.1.4); licheninase (EC 3.2.1.73); endo-1,4-beta-xylanase (EC 3.2.1.8); reducing-end-xylose releasing exo-oligoxylanase (EC 3.2.1.156)
GH81		5	5		0	17.7101	18.807	0	1	1			1	3.80989	6.97963	0	0	5.397	0.057002	10	3	12.1723	3.2373	-8.93504	0.5	1	endo-beta-1,3-glucanase (EC 3.2.1.39)
GH82	19	53	25		94.1405	187.727	94.0348	0				2		0	0	0	41.121	0	0.00179184	97	2	125.301	8.22419	-117.077	0.92	na	Iota;-carrageenase (EC 3.2.1.157)
GH84	7	3	12		34.6833	10.6261	45.1367	0	20	4	17		6	76.1977	27.9185	145.19	0	32.382	0.238905	22	47	30.1487	56.3376	26.1889	0.75	0.19	N-acetyl beta-glucosaminidase (EC 3.2.1.52); hyaluronidase (EC 3.2.1.35); [protein]-3-O-(GlcNAc)-L-Ser/Thr beta-N-acetylglucosaminidase (EC 3.2.1.169)
GH85		3	1		0	10.6261	3.76139	0	2	1	1			7.61977	6.97963	8.54058	0	0	0.481164	4	4	4.79581	4.628	-0.167816	0.2	0.5	endo-beta-N-acetylglucosaminidase (EC 3.2.1.96)
GH86	15	37	90		74.3214	131.055	338.525	0						0	0	0	0	0	0.0106722	142	0	181.3	0	-181.3	0.74	na	beta-agarase (EC 3.2.1.81); beta-porphyranase (EC 3.2.1.178)
GH87					0	0	0	0		1			1	0	6.97963	0	0	5.397	0.136178	0	2	0	2.47533	2.47533	na	0.5	mycodextranase (EC 3.2.1.61); alpha-1,3-glucanase (EC 3.2.1.59)
GH88	59	29	94		292.331	102.718	353.571	0	8	11	1	1	9	30.4791	76.776	8.54058	20.5605	48.573	0.00502095	182	30	249.54	36.9858	-212.554	0.64	0.3	d-4,5-unsaturated beta-glucuronyl hydrolase (EC 3.2.1.-)
GH89	6	15	15		29.7286	53.1303	56.4209	0	33	10	5	14	3	125.726	69.7963	42.7029	287.847	16.191	0.187704	36	65	46.4266	108.453	62.0261	0.5	0.43	alpha-N-acetylglucosaminidase (EC 3.2.1.50)
GH9	13	37	8		64.4119	131.055	30.0911	0	36	36	18	6	21	137.156	251.267	153.731	123.363	113.337	0.0438527	58	117	75.1859	155.771	80.5847	0.57	0.44	endoglucanase (EC 3.2.1.4); endo-β-1,3(4)-glucanase / lichenase-laminarinase (EC 3.2.1.6); lichenase / endo-β-1,3-1,4-glucanase (EC 3.2.1.73); exo-β-1,4-glucanase / cellodextrinase (EC 3.2.1.74); cellobiohydrolase (EC 3.2.1.91); xyloglucan-specific endo-β-1,4-glucanase / endo-xyloglucanase (EC 3.2.1.151); exo-β-glucosaminidase (EC 3.2.1.165); endo-β-1,4-glucanase (xanthanase) (EC 3.2.1.-)
GH92	64	36	40		317.105	127.513	150.456	0	80	74	35		21	304.791	516.493	298.92	0	113.337	0.357333	140	210	198.358	246.708	48.3506	0.66	0.41	mannosyl-oligosaccharide alpha-1,2-mannosidase (EC 3.2.1.113); mannosyl-oligosaccharide alpha-1,3-mannosidase (EC 3.2.1.-); mannosyl-oligosaccharide alpha-1,6-mannosidase (EC 3.2.1.-); alpha-mannosidase (EC 3.2.1.24); alpha-1,2-mannosidase (EC 3.2.1.-); alpha-1,3-mannosidase (EC 3.2.1.-); alpha-1,4-mannosidase (EC 3.2.1.-); mannosyl-1-phosphodiester alpha-1,P-mannosidase (EC 3.2.1.-)
GH93		1	1		0	3.54202	3.76139	0		1		9		0	6.97963	0	185.044	0	0.244953	2	10	2.43447	38.4048	35.9703	1	0.1	exo-alpha-L-1,5-arabinanase (EC 3.2.1.-)
GH94	30	48	35		148.643	170.017	131.649	0	34	20	10	18	45	129.536	139.593	85.4058	370.089	242.865	0.275351	113	127	150.103	193.498	43.3949	0	0	cellobiose phosphorylase (EC 2.4.1.20); laminaribiose phosphorylase (EC 2.4.1.31); cellodextrin phosphorylase (EC 2.4.1.49); chitobiose phosphorylase (EC 2.4.1.-); cyclic beta-1,2-glucan synthase (EC 2.4.1.-); cellobionic acid phosphorylase (EC 2.4.1.321); beta-1,2-oligoglucan phosphorylase (EC 2.4.1.-)
GH95	35	13	42		173.417	46.0462	157.978	0	53	34	33	23	34	201.924	237.308	281.839	472.891	183.498	0.0472218	90	177	125.814	275.492	149.678	0.26	0.31	alpha-L-fucosidase (EC 3.2.1.51); alpha-1,2-L-fucosidase (EC 3.2.1.63); alpha-L-galactosidase (EC 3.2.1.-)
GH97	58	90	165		287.376	318.782	620.63	0	123	68	68	3	43	468.616	474.615	580.76	61.6814	232.071	0.384805	313	305	408.929	363.549	-45.3805	0.65	0.3	glucoamylase (EC 3.2.1.3); alpha-glucosidase (EC 3.2.1.20); alpha-galactosidase (EC 3.2.1.22)
GH98					0	0	0	0	4	4	8		6	15.2395	27.9185	68.3247	0	32.382	0.0533332	0	22	0	28.773	28.773	na	0.09	blood-group endo-beta-1,4-galactosidase (EC 3.2.1.102); blood group A- and B-cleaving endo-beta-1,4-galactosidase (EC 3.2.1.-); endo-beta-1,4-xylanase (EC 3.2.1.8); endo-beta-1,4-xylanase (EC 3.2.1.8)
GH99	2	1	5		9.90953	3.54202	18.807	0	2	4	1	3	1	7.61977	27.9185	8.54058	61.6814	5.397	0.230495	8	11	10.7528	22.2315	11.4786	0.45	0.27	glycoprotein endo-alpha-1,2-mannosidase (EC 3.2.1.130); mannan endo-1,2-alpha-mannanase (3.2.1.-)
PL1	2				9.90953	0	0	0		1	2	2	3	0	6.97963	17.0812	41.121	16.191	0.112475	2	8	3.30318	16.2746	12.9714	1	0.38	pectate lyase (EC 4.2.2.2); exo-pectate lyase (EC 4.2.2.9); pectin lyase (EC 4.2.2.10).
PL1_1					0	0	0	0	12	8	5	2	7	45.7186	55.8371	42.7029	41.121	37.779	1.79865e-05	0	34	0	44.6317	44.6317	na	0.24
PL1_10					0	0	0	0	7	6	7		13	26.6692	41.8778	59.7841	0	70.161	0.0267016	0	33	0	39.6984	39.6984	na	0.3
PL1_11					0	0	0	0	1	3	1		2	3.80989	20.9389	8.54058	0	10.794	0.0563864	0	7	0	8.81668	8.81668	na	0.86
PL1_12					0	0	0	0			1	12		0	0	8.54058	246.726	0	0.231895	0	13	0	51.0533	51.0533	na	0.08
PL1_2					0	0	0	0	38	16	29	1	38	144.776	111.674	247.677	20.5605	205.086	0.0157475	0	122	0	145.955	145.955	na	0.31
PL1_4					0	0	0	0						0	0	0	0	0	#DIV/0!	0	0	0	0	0	na	na
PL1_5					0	0	0	0	2		2		4	7.61977	0	17.0812	0	21.588	0.0828487	0	8	0	9.25779	9.25779	na	0.13
PL1_7					0	0	0	0				5	1	0	0	0	102.802	5.397	0.227424	0	6	0	21.6399	21.6399	na	0
PL10_1	2				9.90953	0	0	0	6		6		9	22.8593	0	51.2435	0	48.573	0.10459	2	21	3.30318	24.5352	21.232	1	0.33
PL11					0	0	0	0	1	1		10	3	3.80989	6.97963	0	205.605	16.191	0.207557	0	15	0	46.5171	46.5171	na	0.13	rhamnogalacturonan endolyase (EC 4.2.2.23); rhamnogalacturonan exolyase (EC 4.2.2.24)
PL11_1					0	0	0	0	54	14	22		42	205.734	97.7149	187.893	0	226.674	0.021507	0	132	0	143.603	143.603	na	0.21
PL12	3		2		14.8643	0	7.52278	0					1	0	0	0	0	5.397	0.0568182	5	1	7.46236	1.0794	-6.38296	0	0	heparin-sulfate lyase (EC 4.2.2.8); heparin lyase / heparin lyase I (EC 4.2.2.7)
PL12_1		2			0	7.08403	0	0	1	1			1	3.80989	6.97963	0	0	5.397	0.371682	2	3	2.36134	3.2373	0.87596	0	0
PL12_2	2				9.90953	0	0	0						0	0	0	0	0	0.109972	2	0	3.30318	0	-3.30318	0	na
PL12_3					0	0	0	0	4	1			1	15.2395	6.97963	0	0	5.397	0.095215	0	6	0	5.52324	5.52324	na	0
PL13	5	4	11		24.7738	14.1681	41.3753	0						0	0	0	0	0	0.00178833	20	0	26.7724	0	-26.7724	0.85	na	heparin lyase (EC 4.2.2.7);
PL14_3					0	0	0	0		1				0	6.97963	0	0	0	0.240809	0	1	0	1.39593	1.39593	na	1
PL15_1			1		0	0	3.76139	0						0	0	0	0	0	0.109972	1	0	1.2538	0	-1.2538	0	na
PL15_2			2		0	0	7.52278	0						0	0	0	0	0	0.109972	2	0	2.50759	0	-2.50759	0	na
PL17	6	1	2		29.7286	3.54202	7.52278	0						0	0	0	0	0	0.0311642	9	0	13.5978	0	-13.5978	0	na	alginate lyase (EC 4.2.2.3); oligoalginate lyase (EC 4.2.2.26)
PL17_2			1		0	0	3.76139	0		1		2		0	6.97963	0	41.121	0	0.231863	1	3	1.2538	9.62012	8.36632	0	0.33
PL22	10	6	2		49.5476	21.2521	7.52278	0	30	18	12		16	114.297	125.633	102.487	0	86.3521	0.0522679	18	76	26.1075	85.7538	59.6463	0.9	0.2	oligogalacturonate lyase / oligogalacturonide lyase (EC 4.2.2.6)
PL22_2					0	0	0	0		1				0	6.97963	0	0	0	0.240809	0	1	0	1.39593	1.39593	na	1
PL25	1	2	2		4.95476	7.08403	7.52278	0				1		0	0	0	20.5605	0	0.338755	5	1	6.52053	4.1121	-2.40843	0.4	na	ulvan lyase (EC 4.2.2.-).
PL26					0	0	0	0	8	2	5		7	30.4791	13.9593	42.7029	0	37.779	0.0278828	0	22	0	24.9841	24.9841	na	0.27	rhamnogalacturonan exolyase (EC 4.2.2.24).
PL27					0	0	0	0	1		1	2	2	3.80989	0	8.54058	41.121	10.794	0.117697	0	6	0	12.8531	12.8531	na	0.33	L-rhamnose-alpha-1,4-D-glucuronate lyase (EC 4.2.2.-)
PL29	5	12	15		24.7738	42.5042	56.4209	0	3	1	2		3	11.4297	6.97963	17.0812	0	16.191	0.00394372	32	9	41.233	10.3363	-30.8967	0.85	0.11	chondroitin-sulfate ABC endolyase (EC 4.2.2.20)
PL30	6	7	28		29.7286	24.7941	105.319	0		1		1	1	0	6.97963	0	20.5605	5.397	0.0276677	41	3	53.2806	6.58742	-46.6931	0.76	0.33	hyaluronate lyase (EC 4.2.2.1)
PL31					0	0	0	0	2	1	1			7.61977	6.97963	8.54058	0	0	0.059189	0	4	0	4.628	4.628	na	0.25	endo-beta-1,4-glucuronan lyase (EC 4.2.2.14); poly(beta-mannuronate) lyase / M-specific alginate lyase (EC 4.2.2.3)
PL33		1	2		0	3.54202	7.52278	0						0	0	0	0	0	0.0295507	3	0	3.68827	0	-3.68827	0.33	na	hyaluronate lyase (EC 4.2.2.1); gellan lyase (EC 4.2.2.25); chondroitin sulfate lyase (EC 4.2.2.20)
PL33_1	4	1	4		19.8191	3.54202	15.0456	0	5	5	2		12	19.0494	34.8982	17.0812	0	64.764	0.187199	9	24	12.8022	27.1586	14.3563	0	0.29
PL33_2			1		0	0	3.76139	0						0	0	0	0	0	0.109972	1	0	1.2538	0	-1.2538	0	na
PL34	13	1	14		64.4119	3.54202	52.6595	0						0	0	0	0	0	0.012756	28	0	40.2045	0	-40.2045	0	na	alginate lyase (EC 4.2.2.-)
PL35	8	3	6		39.6381	10.6261	22.5684	0		6				0	41.8778	0	0	0	0.129363	17	6	24.2775	8.37556	-15.9019	0.22	0.83	chondroitin lyase / chondroitinase (EC 4.2.2.-); chondroitin AC lyase (EC 4.2.2.5)
PL37	3	3			14.8643	10.6261	0	0		1				0	6.97963	0	0	0	0.0526904	6	1	8.49678	1.39593	-7.10085	0.5	0	chondroitin-sulfate ABC endolyase (EC 4.2.2.20); heparin-sulfate lyase / heparin lyase III (EC 4.2.2.8); ulvan lyase (EC 4.2.2.-)
PL38	20	27	41		99.0953	95.6345	154.217	0		1			1	0	6.97963	0	0	5.397	9.32753e-05	88	2	116.316	2.47533	-113.84	0.64	0.5	endo-beta-1,4-glucuronan lyase (EC 4.2.2.14)
PL39	5	8	18		24.7738	28.3361	67.7051	0						0	0	0	0	0	0.00352329	31	0	40.2717	0	-40.2717	0.31	na	alginate lyase (EC 4.2.2.-)
PL4_1					0	0	0	0		1	1			0	6.97963	8.54058	0	0	0.135082	0	2	0	3.10404	3.10404	na	0.5
PL4_2					0	0	0	0	8				1	30.4791	0	0	0	5.397	0.199151	0	9	0	7.17522	7.17522	na	0.33
PL40	45	11	94		222.964	38.9622	353.571	0		1				0	6.97963	0	0	0	0.0111633	150	1	205.166	1.39593	-203.77	0.66	1	ulvan lyase (EC 4.2.2.-)
PL41			5		0	0	18.807	0						0	0	0	0	0	0.109972	5	0	6.26899	0	-6.26899	0.71	na
PL42	4	2	4	0	19.8191	7.08403	15.0456	0		1			1	0	6.97963	0	0	5.397	0.00738007	10	2	13.9829	2.47533	-11.5076	0.25	1
PL6_1	21	20	46		104.05	70.8403	173.024	0	5	3				19.0494	20.9389	0	0	0	0.00164816	87	8	115.971	7.99767	-107.974	0.76	0.38
PL7_1	4		1		19.8191	0	3.76139	0						0	0	0	0	0	0.0634718	5	0	7.86015	0	-7.86015	1	na
PL7_3	8		1		39.6381	0	3.76139	0						0	0	0	0	0	0.0839528	9	0	14.4665	0	-14.4665	1	na
PL7_5			1		0	0	3.76139	0						0	0	0	0	0	0.109972	1	0	1.2538	0	-1.2538	0	na
PL8_1	15	11	24		74.3214	38.9622	90.2734	0						0	0	0	0	0	0.00043153	50	0	67.8523	0	-67.8523	0.71	na
PL8_2	3		7		14.8643	0	26.3297	0						0	0	0	0	0	0.0243303	10	0	13.7313	0	-13.7313	0.2	na
PL8_3	3		1		14.8643	0	3.76139	0						0	0	0	0	0	0.0526966	4	0	6.20856	0	-6.20856	0	na
PL9					0	0	0	0	1			7		3.80989	0	0	143.923	0	0.233962	0	8	0	29.5466	29.5466	na	0.13	pectate lyase (EC 4.2.2.2); exopolygalacturonate lyase (EC 4.2.2.9); thiopeptidoglycan lyase (EC 4.2.2.-); rhamnogalacturonan endolyase (EC 4.2.2.23)
PL9_1	2		7		9.90953	0	26.3297	0	17	4	12	1	26	64.7681	27.9185	102.487	20.5605	140.322	0.0511103	9	60	12.0798	71.2112	59.1315	0.91	0.3
PL9_2	11	21	20		54.5024	74.3824	75.2278	0					1	0	0	0	0	5.397	6.38061e-06	52	1	68.0375	1.0794	-66.9581	0.61	1

## Sheet: SulfAtlas1.3 fish-ruminant comp
Sulfatase class	raw F5	raw F6	raw F7	raw F8	F5 per 1M	F6 per 1M	F7 per 1M	F8 per 1M	raw red deer	raw reindeer	raw sheep	raw cattle	raw co-assembly	glen raw total	red deer per 1M	reindeer per 1M	sheep per 1M	cattle per 1M	co-asembly per 1M	diff p-value NORM F567, Rum 1 sided, homo-scedastic	raw F5+6+7 total	raw Ruminant total	avg norm F567 total	avg norm rum tot	avg rum-fish diff
S1_16	134	104	132	20	663.938	368.37	496.504	28.4971	142	37	22	5	32	238	541.004	258.246	187.893	102.802	172.704	0.0373165	370	238	509.604	252.53	-257.074
S1_17	74	99	172	21	366.652	350.66	646.959	29.922	19	5	3			27	72.3878	34.8982	25.6218	0	0	0.00052365	345	27	454.757	26.5816	-428.176
S1_15	103	83	157	18	510.341	293.987	590.539	25.6474	37	5	4	3	12	61	140.966	34.8982	34.1623	61.6814	64.764	0.000627665	343	61	464.956	67.2944	-397.661
S1_8	78	98	92	20	386.472	347.118	346.048	28.4971	74	19	11	3	24	131	281.932	132.613	93.9464	61.6814	129.528	0.00258578	268	131	359.879	139.94	-219.939
S1_19	23	75	106	4	113.96	265.651	398.708	5.69943	1					1	3.80989	0	0	0	0	0.0025313	204	1	259.439	0.761977	-258.677
S1_11	26	63	84	7	128.824	223.147	315.957	9.974	137	25	31	8	19	220	521.954	174.491	264.758	164.484	102.543	0.417677	173	220	222.643	245.646	23.0034
S1_14	64	28	66	13	317.105	99.1765	248.252	18.5231	95	19	18	9	13	154	361.939	132.613	153.731	185.044	70.161	0.31517	158	154	221.511	180.698	-40.8134
S1_20	46	62	48	3	227.919	219.605	180.547	4.27457	33	7	7	3	9	59	125.726	48.8574	59.7841	61.6814	48.573	0.000350008	156	59	209.357	68.9245	-140.433
S1_28	27	17	79	12	133.779	60.2143	297.15	17.0983	22	5	3		6	36	83.8175	34.8982	25.6218	0	32.382	0.0279106	123	36	163.714	35.3439	-128.37
S1_24	6	46	53	1	29.7286	162.933	199.354	1.42486	5				2	7	19.0494	0	0	0	10.794	0.00839789	105	7	130.672	5.96869	-124.703
S1_4	14	34	56	4	69.3667	120.429	210.638	5.69943	15	5	2	2	5	29	57.1483	34.8982	17.0812	41.121	26.985	0.0103666	104	29	133.478	35.4467	-98.031
S1_25	21	25	56	2	104.05	88.5504	210.638	2.84971	21	5	4		6	36	80.0076	34.8982	34.1623	0	32.382	0.0121015	102	36	134.413	36.29	-98.1228
S1_72	6	29	53	2	29.7286	102.718	199.354	2.84971						0	0	0	0	0	0	0.0107918	88	0	110.6	0	-110.6
S1_23	34	12	35	10	168.462	42.5042	131.649	14.2486	2					2	7.61977	0	0	0	0	0.00312558	81	2	114.205	1.52395	-112.681
S1_7	19	28	24	1	94.1405	99.1765	90.2734	1.42486	229	37	47	14	48	375	872.464	258.246	401.407	287.847	259.056	0.0427319	71	375	94.5301	415.804	321.274
S1_29	7	13	36	1	34.6833	46.0462	135.41	1.42486	2		2			4	7.61977	0	17.0812	0	0	0.0149309	56	4	72.0466	4.94019	-67.1064
S1_30	2	37	8	2	9.90953	131.055	30.0911	2.84971	2					2	7.61977	0	0	0	0	0.0448119	47	2	57.0184	1.52395	-55.4945
S1_27	16	7	23	2	79.2762	24.7941	86.512	2.84971	11	5	3		2	21	41.9088	34.8982	25.6218	0	10.794	0.0292711	46	21	63.5275	22.6445	-40.8829
S1_62	13	4	23	8	64.4119	14.1681	86.512	11.3989						0	0	0	0	0	0	0.00625534	40	0	55.0307	0	-55.0307
S1_N.C.	9	13	11	2	44.5929	46.0462	41.3753	2.84971						0	0	0	0	0	0	4.83145e-09	33	0	44.0048	0	-44.0048
S1_13	26	4	2		128.824	14.1681	7.52278	0					1	1	0	0	0	0	5.397	0.0695201	32	1	50.1716	1.0794	-49.0922
S1_51	9	13	10	2	44.5929	46.0462	37.6139	2.84971						0	0	0	0	0	0	2.52682e-07	32	0	42.751	0	-42.751
S1_46	18	1	11	2	89.1857	3.54202	41.3753	2.84971	2					2	7.61977	0	0	0	0	0.0277191	30	2	44.701	1.52395	-43.1771
S1_9	4	8	12		19.8191	28.3361	45.1367	0	50	11	10	3	6	80	190.494	76.776	85.4058	61.6814	32.382	0.0793813	24	80	31.0973	89.3479	58.2506
S1_22	9	4	10	1	44.5929	14.1681	37.6139	1.42486	224	46	44	18	45	377	853.415	321.063	375.786	370.089	242.865	0.0159554	23	377	32.125	432.643	400.518
S1_52	5	2	10		24.7738	7.08403	37.6139	0						0	0	0	0	0	0	0.00580129	17	0	23.1573	0	-23.1573
S1_31	2	7	4		9.90953	24.7941	15.0456	0	1	1				2	3.80989	6.97963	0	0	0	0.00401302	13	2	16.5831	2.1579	-14.4252
S1_40	1	7	4		4.95476	24.7941	15.0456	0	1	1				2	3.80989	6.97963	0	0	0	0.0159063	12	2	14.9315	2.1579	-12.7736
S1_43	4	5	3		19.8191	17.7101	11.2842	0					1	1	0	0	0	0	5.397	0.000334856	12	1	16.2711	1.0794	-15.1917
S1_53	2	3	6		9.90953	10.6261	22.5684	0	2				2	4	7.61977	0	0	0	10.794	0.0237187	11	4	14.368	3.68276	-10.6852
S1_55	4	5	2	1	19.8191	17.7101	7.52278	1.42486		1				1	0	6.97963	0	0	0	0.0032543	11	1	15.0173	1.39593	-13.6214
S1_65	8	1	2	1	39.6381	3.54202	7.52278	1.42486	19	5	8	2	2	36	72.3878	34.8982	68.3247	41.121	10.794	0.0745739	11	36	16.901	45.5051	28.6042
S1_59	6	2	2		29.7286	7.08403	7.52278	0	1		1			2	3.80989	0	8.54058	0	0	0.0411208	10	2	14.7785	2.47009	-12.3084
S1_64	2		7		9.90953	0	26.3297	0	13	3	5	4	2	27	49.5285	20.9389	42.7029	82.2419	10.794	0.0733317	9	27	12.0798	41.2413	29.1615
S1_54	1	4	3		4.95476	14.1681	11.2842	0	1					1	3.80989	0	0	0	0	0.00284246	8	1	10.1357	0.761977	-9.37369
S1_56	3		4		14.8643	0	15.0456	0						0	0	0	0	0	0	0.0169023	7	0	9.96995	0	-9.96995
S1_12	4		2		19.8191	0	7.52278	0	1				1	2	3.80989	0	0	0	5.397	0.0782413	6	2	9.11395	1.84138	-7.27257
S1_60	2	1	3		9.90953	3.54202	11.2842	0						0	0	0	0	0	0	0.00160538	6	0	8.24524	0	-8.24524
S1_50	1	1	2		4.95476	3.54202	7.52278	0	1					1	3.80989	0	0	0	0	0.00678006	4	1	5.33985	0.761977	-4.57788
S1_36	2		1		9.90953	0	3.76139	0						0	0	0	0	0	0	0.0370125	3	0	4.55697	0	-4.55697
S1_67	1		2		4.95476	0	7.52278	0						0	0	0	0	0	0	0.0208957	3	0	4.15918	0	-4.15918
S1_71	1		2		4.95476	0	7.52278	0	1	1				2	3.80989	6.97963	0	0	0	0.225243	3	2	4.15918	2.1579	-2.00128
S1_26	2				9.90953	0	0	0						0	0	0	0	0	0	0.109972	2	0	3.30318	0	-3.30318
S1_44		2			0	7.08403	0	0						0	0	0	0	0	0	0.109972	2	0	2.36134	0	-2.36134
S1_37	1				4.95476	0	0	0						0	0	0	0	0	0	0.109972	1	0	1.65159	0	-1.65159
S1_57			1		0	0	3.76139	0						0	0	0	0	0	0	0.109972	1	0	1.2538	0	-1.2538
S1_63		1			0	3.54202	0	0	31	9	4		2	46	118.106	62.8167	34.1623	0	10.794	0.0852428	1	46	1.18067	45.1759	43.9952
S1_2				3	0	0	0	4.27457	1				1	2	3.80989	0	0	0	5.397	0.138497	0	2	0	1.84138	1.84138
S1_6					0	0	0	0	19	3	2		10	34	72.3878	20.9389	17.0812	0	53.97	0.0553776	0	34	0	32.8756	32.8756

## Sheet: prot num normalization factors
Normalization factors	all fish (incl F8)	adult fish (F5,F6,F7) only	391 ruminant MAGs	F5 sample tally	F6 sample tally	F7 sample tally	F8 sample tally	red deer sample tally	reindeer sample tally	sheep sample tally	cattle sample tally	co-assembly sample tally
total prokka genes	1451919	750010	1513915	201826	282325	265859	701825	262475	143274	117088	48637	185288
total GH + PL + CE classified prots	15378	14531	17214	3457	4733	6341	844	5871	3738	2801	1077	3727
total SulfAtlas classified prots	13089.5	12857	2026	840	948	1419	163	1215	255	231	74	251
pct proteins as GH +PL +CE	0.0105915	0.0193744	0.0113705	0.0171286	0.0167644	0.023851	0.00120258	0.0223678	0.0260899	0.0239222	0.0221436	0.0201146
pct proteins as sulfatases	0.00901531	0.0171424	0.00133825	0.004162	0.00335783	0.00533742	0.000232252	0.00462901	0.00177981	0.00197288	0.00152148	0.00135465
