# Supplementary material for: Herbivorous fish microbiome adaptations to sulfated dietary polysaccharides
Source: Research Square preprint supplement (doi:10.21203/rs.3.rs-1754689/v1), 2022-06-21
Supplement: Supplementary file 6 [file d8f6394ba793990fe5b3e35a.xlsx]

## Sheet:  euke_silva_matches >30% aln
Additional File 4
Table of 18S rRNA gene matches to assembled metagenomic contigs.
Top SILVA Database (v138.1) matches to assembled metagenomic contigs were filtered for alignment lengths covering at least 30% of the database reference sequence (> 530 nt).
Kmer coverage values (relative sequence abundance in DNA sample) were obtained from MetaSpades assembly program output.
Query_id	Silva ref length	pct aln cover	query lineage	ecology	ctg source	kmer coverage	Subject_id	pct ident	alin len	mis-matches	gaps	q_start	q_end	s_start	s_end	e-value	bit score
AF149909.1	1942	0.358393	Eukaryota;Amoebozoa;Archamoebae;Entamoebida;Entamoeba;Entamoeba insolita	amoeba parasite/commensal	F6HG3	24.1695	NODE_2110_length_10662_cov_24.169511	91.52	696	52	4	2483	3172	756	1450	0	886
AF149909.1	1942	0.358393	Eukaryota;Amoebozoa;Archamoebae;Entamoebida;Entamoeba;Entamoeba insolita	amoeba parasite/commensal	F6HG3	18.9612	NODE_3937_length_6997_cov_18.961250	91.52	696	52	4	5289	5978	1450	756	0	886
JX565069.1	1552	0.346649	Eukaryota;Excavata;Metamonada;Parabasalia;Hypotrichomonadea;Hypotrichomonas;Hypotrichomonas sp. KGD-2012	flagellated protozoan	F6HG3	18.8186	NODE_19919_length_2392_cov_18.818571	97.77	538	8	3	1550	2087	1	534	0	950
JX565069.1	1552	0.636598	Eukaryota;Excavata;Metamonada;Parabasalia;Hypotrichomonadea;Hypotrichomonas;Hypotrichomonas sp. KGD-2012	flagellated protozoan	F6HG2	14.9432	NODE_6699_length_3749_cov_14.943151	94.64	988	26	7	157	1137	578	1545	0	1493
JX565069.1	1552	0.638531	Eukaryota;Excavata;Metamonada;Parabasalia;Hypotrichomonadea;Hypotrichomonas;Hypotrichomonas sp. KGD-2012	flagellated protozoan	F6GI4	8.17	NODE_1927_length_6002_cov_8.170002	95.26	991	21	6	1696	2683	578	1545	0	1554
AY821962.1	1335	0.555805	Eukaryota;Excavata;Metamonada;Parabasalia;Trichomonadea;Lacusteria;uncultured trichomonad parabasalid	flagellated protozoan	F7HG3	35.61	NODE_7892_length_3396_cov_35.609997	87.74	742	87	4	1	739	867	127	0	718
KC594038.1	1554	0.730373	Eukaryota;Excavata;Metamonada;Parabasalia;Trichomonadea;Pentatrichomonas;Pentatrichomonas hominis	flagellated protozoan	F7HG2	185.492	NODE_7220_length_4927_cov_185.492406	89.25	1135	92	11	1142	2270	444	1554	0	1233
GQ254637.1	1492	0.969169	Eukaryota;Excavata;Metamonada;Parabasalia;Trichomonadea;Simplicimonas;Simplicimonas similis	flagellated protozoan	F5GI2	40.4318	NODE_1003_length_2971_cov_40.431756	94.33	1446	73	8	1	1441	1442	1	0	2155
GQ254637.1	1492	1.00402	Eukaryota;Excavata;Metamonada;Parabasalia;Trichomonadea;Simplicimonas;Simplicimonas similis	flagellated protozoan	F8GI3	30.8437	NODE_1520_length_4816_cov_30.843730	94.53	1498	71	10	237	1729	1	1492	0	2242
AY886872.1	1515	1.00198	Eukaryota;Excavata;Metamonada;Parabasalia;Trichomonadea;Tetratrichomonas;Tetratrichomonas limacis	flagellated protozoan	F6HG2	24.0494	NODE_3297_length_4507_cov_24.049416	96.44	1518	39	5	2551	4056	1515	1	0	2561
AY245118.1	1513	1.00264	Eukaryota;Excavata;Metamonada;Parabasalia;Trichomonadea;Tetratrichomonas;Tetratrichomonas prowazeki	flagellated protozoan	F7HG2	175.116	NODE_12647_length_3622_cov_175.116064	96.04	1517	55	5	1036	2551	1	1513	0	2492
AY245118.1	1513	1.00264	Eukaryota;Excavata;Metamonada;Parabasalia;Trichomonadea;Tetratrichomonas;Tetratrichomonas prowazeki	flagellated protozoan	F7HG3	147.8	NODE_8455_length_3276_cov_147.800373	96.11	1517	54	5	1072	2587	1513	1	0	2500
HQ149972.1	1516	0.809367	Eukaryota;Excavata;Metamonada;Parabasalia;Trichomonadea;Tetratrichomonas;Tetratrichomonas sp. MA3	flagellated protozoan	F8HG2	43.9214	NODE_1848_length_3772_cov_43.921442	96.5	1227	41	2	1	1227	245	1469	0	2076
AY886871.1	1518	0.809618	Eukaryota;Excavata;Metamonada;Parabasalia;Trichomonadea;Tetratrichomonas;Tetratrichomonas sp. ZUBR	flagellated protozoan	F8HG3	21.8598	NODE_72851_length_2909_cov_21.859846	94.87	1229	52	4	1	1218	245	1473	0	1919
AB076624.1	1809	0.463239	Eukaryota;Opisthokonta;Holozoa;Metazoa (Animalia);Eumetazoa;Bilateria;Arthropoda;Crustacea;Ostracoda;Podocopa;Podocopida;Xiphichilus sp. SN003	ostracod crustacean	F8GI2	7.37114	NODE_405_length_4137_cov_7.371142	95.7	838	32	4	1	837	975	1809	0	1344
AY830152.1	1725	1	Eukaryota;Opisthokonta;Holozoa;Metazoa (Animalia);Eumetazoa;Bilateria;Acanthocephala;Palaeacanthocephala;Echinorhynchida;Acanthocephalus lucii	parasitic worm	F7GI3	184.815	NODE_1630_length_7242_cov_184.815361	97.68	1725	39	1	3169	4892	1725	1	0	3094
AY830152.1	1725	1	Eukaryota;Opisthokonta;Holozoa;Metazoa (Animalia);Eumetazoa;Bilateria;Acanthocephala;Palaeacanthocephala;Echinorhynchida;Acanthocephalus lucii	parasitic worm	F7HG2	65.8236	NODE_4243_length_6575_cov_65.823620	97.68	1725	39	1	1689	3412	1	1725	0	3094
AY830152.1	1725	1	Eukaryota;Opisthokonta;Holozoa;Metazoa (Animalia);Eumetazoa;Bilateria;Acanthocephala;Palaeacanthocephala;Echinorhynchida;Acanthocephalus lucii	parasitic worm	F6GI4	39.5868	NODE_1436_length_7168_cov_39.586813	97.68	1725	39	1	2282	4005	1	1725	0	3094
AY830152.1	1725	1	Eukaryota;Opisthokonta;Holozoa;Metazoa (Animalia);Eumetazoa;Bilateria;Acanthocephala;Palaeacanthocephala;Echinorhynchida;Acanthocephalus lucii	parasitic worm	F7HG3	28.2191	NODE_1647_length_7627_cov_28.219097	97.68	1725	39	1	1703	3426	1	1725	0	3094
AY830152.1	1725	1	Eukaryota;Opisthokonta;Holozoa;Metazoa (Animalia);Eumetazoa;Bilateria;Acanthocephala;Palaeacanthocephala;Echinorhynchida;Acanthocephalus lucii	parasitic worm	F6HG3	13.8479	NODE_2897_length_8673_cov_13.847877	97.68	1725	39	1	4781	6504	1725	1	0	3094
AY830152.1	1725	1	Eukaryota;Opisthokonta;Holozoa;Metazoa (Animalia);Eumetazoa;Bilateria;Acanthocephala;Palaeacanthocephala;Echinorhynchida;Acanthocephalus lucii	parasitic worm	F6GI3	13.4013	NODE_281_length_7429_cov_13.401275	97.68	1725	39	1	3164	4887	1725	1	0	3094
AY830152.1	1725	1	Eukaryota;Opisthokonta;Holozoa;Metazoa (Animalia);Eumetazoa;Bilateria;Acanthocephala;Palaeacanthocephala;Echinorhynchida;Acanthocephalus lucii	parasitic worm	F6HG2	7.88196	NODE_2608_length_7112_cov_7.881961	97.68	1725	39	1	3545	5268	1725	1	0	3094
AY830152.1	1725	0.934493	Eukaryota;Opisthokonta;Holozoa;Metazoa (Animalia);Eumetazoa;Bilateria;Acanthocephala;Palaeacanthocephala;Echinorhynchida;Acanthocephalus lucii	parasitic worm	F5HG3	2.94277	NODE_11325_length_3235_cov_2.942767	97.83	1612	35	0	1	1612	1612	1	0	2918
AY234237.1	1768	0.999434	Eukaryota;Archaeplastida;Rhodophyceae;Florideophycidae;Corallinophycidae;Hydrolithon;Hydrolithon onkodes	Red coralline algae	F8GI3	39.1291	NODE_191_length_8055_cov_39.129125	99.09	1767	16	0	2487	4253	1768	2	0	3376
Y16914.1	1852	0.322894	Eukaryota;Opisthokonta;Holozoa;Metazoa (Animalia);Eumetazoa;Bilateria;Nematoda;Enoplea;Enoplia;Enoplida;Enoplus meridionalis	worm	F8GI2	35.5906	NODE_3725_length_2004_cov_35.590559	99.5	598	1	2	1	598	609	14	0	1146
AY222124.1	1933	0.999483	Eukaryota;Opisthokonta;Holozoa;Metazoa (Animalia);Eumetazoa;Bilateria;Platyhelminthes;Trematoda;Digenea;Plagiorchiida;Enenterum aureum	worm	F7GI2	52.2825	NODE_71_length_11292_cov_52.282460	98.5	1932	26	1	269	2200	5	1933	0	3596
AY222124.1	1933	0.999483	Eukaryota;Opisthokonta;Holozoa;Metazoa (Animalia);Eumetazoa;Bilateria;Platyhelminthes;Trematoda;Digenea;Plagiorchiida;Enenterum aureum	worm	F5GI3	32.313	NODE_244_length_11585_cov_32.313010	98.5	1932	26	1	5472	7403	1933	5	0	3596
AB193741.1	1805	0.366759	Eukaryota;Opisthokonta;Holozoa;Metazoa (Animalia);Eumetazoa;Bilateria;Chordata;Vertebrata;Gnathostomata;Euteleostomi;Actinopterygii;Neopterygii;Teleostei;Auxis rochei	fish	F7HG2	94.6681	NODE_4887_length_6093_cov_94.668102	99.7	662	2	0	1	662	1144	1805	0	1296
AB193741.1	1805	0.710249	Eukaryota;Opisthokonta;Holozoa;Metazoa (Animalia);Eumetazoa;Bilateria;Chordata;Vertebrata;Gnathostomata;Euteleostomi;Actinopterygii;Neopterygii;Teleostei;Auxis rochei	fish	F7HG3	45.9938	NODE_1953_length_6960_cov_45.993773	99.69	1282	4	0	5679	6960	1805	524	0	2510
AB193741.1	1805	0.715789	Eukaryota;Opisthokonta;Holozoa;Metazoa (Animalia);Eumetazoa;Bilateria;Chordata;Vertebrata;Gnathostomata;Euteleostomi;Actinopterygii;Neopterygii;Teleostei;Auxis rochei	fish	F6GI4	9.8168	NODE_1236_length_7839_cov_9.816804	99.69	1292	4	0	6548	7839	1805	514	0	2529
CBXY010019626	1826	1.00055	Eukaryota;Opisthokonta;Holozoa;Metazoa (Animalia);Eumetazoa;Bilateria;Chordata;Vertebrata;Gnathostomata;Euteleostomi;Actinopterygii;Neopterygii;Teleostei;Dicentrarchus labrax (European seabass)	fish	F8HG3	2067.23	NODE_3793_length_9318_cov_2067.232646	99.67	1827	5	1	6491	8317	1826	1	0	3566
CBXY010019626	1826	1.00055	Eukaryota;Opisthokonta;Holozoa;Metazoa (Animalia);Eumetazoa;Bilateria;Chordata;Vertebrata;Gnathostomata;Euteleostomi;Actinopterygii;Neopterygii;Teleostei;Dicentrarchus labrax (European seabass)	fish	F8GI3	1781.42	NODE_288_length_7175_cov_1781.418680	99.67	1827	5	1	4192	6018	1826	1	0	3566
CBXY010019626	1826	1.00055	Eukaryota;Opisthokonta;Holozoa;Metazoa (Animalia);Eumetazoa;Bilateria;Chordata;Vertebrata;Gnathostomata;Euteleostomi;Actinopterygii;Neopterygii;Teleostei;Dicentrarchus labrax (European seabass)	fish	F8GI2	922.094	NODE_95_length_7364_cov_922.094131	99.67	1827	5	1	4238	6064	1826	1	0	3566
CBXY010019626	1826	1.00055	Eukaryota;Opisthokonta;Holozoa;Metazoa (Animalia);Eumetazoa;Bilateria;Chordata;Vertebrata;Gnathostomata;Euteleostomi;Actinopterygii;Neopterygii;Teleostei;Dicentrarchus labrax (European seabass)	fish	F6GI1	484.773	NODE_9_length_7140_cov_484.773465	99.67	1827	5	1	1126	2952	1	1826	0	3566
CBXY010019626	1826	1.00055	Eukaryota;Opisthokonta;Holozoa;Metazoa (Animalia);Eumetazoa;Bilateria;Chordata;Vertebrata;Gnathostomata;Euteleostomi;Actinopterygii;Neopterygii;Teleostei;Dicentrarchus labrax (European seabass)	fish	F7GI3	430.357	NODE_1051_length_9252_cov_430.356855	99.67	1827	5	1	1521	3347	1	1826	0	3566
CBXY010019626	1826	1.00055	Eukaryota;Opisthokonta;Holozoa;Metazoa (Animalia);Eumetazoa;Bilateria;Chordata;Vertebrata;Gnathostomata;Euteleostomi;Actinopterygii;Neopterygii;Teleostei;Dicentrarchus labrax (European seabass)	fish	F8HG2	307.402	NODE_558_length_7013_cov_307.401696	99.67	1827	5	1	995	2821	1	1826	0	3566
CBXY010019626	1826	1.00055	Eukaryota;Opisthokonta;Holozoa;Metazoa (Animalia);Eumetazoa;Bilateria;Chordata;Vertebrata;Gnathostomata;Euteleostomi;Actinopterygii;Neopterygii;Teleostei;Dicentrarchus labrax (European seabass)	fish	F6HG2	14.3725	NODE_1879_length_8967_cov_14.372531	99.62	1827	6	1	6298	8124	1826	1	0	3558
CBXY010019626	1826	1.00055	Eukaryota;Opisthokonta;Holozoa;Metazoa (Animalia);Eumetazoa;Bilateria;Chordata;Vertebrata;Gnathostomata;Euteleostomi;Actinopterygii;Neopterygii;Teleostei;Dicentrarchus labrax (European seabass)	fish	F6HG3	5.59806	NODE_3896_length_7051_cov_5.598056	99.62	1827	6	1	823	2649	1	1826	0	3558
KJ774690.1	1745	0.810315	Eukaryota;Opisthokonta;Holozoa;Metazoa (Animalia);Eumetazoa;Bilateria;Chordata;Vertebrata;Gnathostomata;Euteleostomi;Actinopterygii;Neopterygii;Teleostei;Lates calcarifer (barramundi perch)	fish	F5HG3	6.05525	NODE_6280_length_4417_cov_6.055250	98.8	1414	17	0	2730	4143	1671	258	0	2668
