# Supplementary material for: Herbivorous fish microbiome adaptations to sulfated dietary polysaccharides
Source: Research Square preprint supplement (doi:10.21203/rs.3.rs-1754689/v1), 2022-06-21
Supplement: Supplementary file 7 [file e76beb7b51292f77fcf4cc8c.xlsx]

## Sheet: SupTblS2 fishgut blast
Additional File 2. Table of BLASTP matches for fish gut rpoB genes.
Top database matches for fish gut metagenome rpoB genes of 900 amino acids or longer.
Matches to terrestrial ruminants were translated from assembled MAG nucleotide sequences downloaded from NCBI Genbank (Glendinning et al 2021)
query	subject (db tophit)	db genbank id	db sample source	taxonomic group	pct ident	aln len	mis-match	gaps	qstart	qend	s start	s end	evalue	bit score
F5GI3_14651	RUG30027_00703	CAJODB010000009.1	Red_deer_1_mag_183	Alphaproteobacteria	79.42	1142	188	42	1	1095	244	1385	0	1665
F6HG2_47294	RUG30106_01447	CAJOGV010000067.1	Sheep_2_mag_24	Alphaproteobacteria	61.87	1104	381	33	31	1095	176	1278	0	1254
F6HG3_32541	RUG30137_00350	CAJOHU010000007.1	Red_deer_4_mag_124	Alphaproteobacteria	81.2	1378	197	56	1	1316	1	1378	0	2053
F6HG3_66071	RUG30106_01447	CAJOGV010000067.1	Sheep_2_mag_24	Alphaproteobacteria	63.32	957	303	36	4	918	329	1279	0	1060
F5GI2_07721	RUG30269_00276	CAJOMW010000018.1	Reindeer_2_mag_174	Bacillota (Firmicutes)	57.15	1195	410	48	10	1115	3	1184	0	1198
F5GI2_10245	RUG30220_01219	CAJOKT010000023.1	Reindeer_1_mag_186	Bacillota (Firmicutes)	66.38	1056	290	43	1	993	112	1165	0	1191
F5GI3_08910	RUG30263_01332	CAJOMN010000011.1	Reindeer_2_mag_16	Bacillota (Firmicutes)	69.77	1237	297	54	1	1165	1	1232	0	1514
F5GI3_10570	RUG30263_01332	CAJOMN010000011.1	Reindeer_2_mag_16	Bacillota (Firmicutes)	67.13	1226	316	60	1	1148	1	1217	0	1387
F5HG2_15677	RUG30152_00019	CAJOID010000001.1	Red_deer_4_mag_18	Bacillota (Firmicutes)	78	1282	211	48	3	1213	1	1282	0	1797
F5HG3_27630	RUG30152_00019	CAJOID010000001.1	Red_deer_4_mag_18	Bacillota (Firmicutes)	78	1282	211	48	3	1213	1	1282	0	1797
F5HG3_29593	RUG30263_01332	CAJOMN010000011.1	Reindeer_2_mag_16	Bacillota (Firmicutes)	77.31	1265	222	48	1	1202	1	1263	0	1774
F5HG3_36160	RUG30263_01332	CAJOMN010000011.1	Reindeer_2_mag_16	Bacillota (Firmicutes)	77.55	1265	217	48	1	1200	1	1263	0	1696
F5HG3_52665	RUG30359_00833	CAJOQC010000150.1	Rumen_Coassembly_mag_401	Bacillota (Firmicutes)	62.87	1177	318	39	6	1063	10	1186	0	1276
F6GI3_01135	RUG30215_00723	CAJOLG010000038.1	Reindeer_1_mag_132	Bacillota (Firmicutes)	62.78	1330	422	55	3	1263	4	1329	0	1506
F6GI4_06804	RUG30263_01332	CAJOMN010000011.1	Reindeer_2_mag_16	Bacillota (Firmicutes)	77.65	1266	215	50	1	1199	1	1265	0	1774
F6GI4_26140	RUG30152_00019	CAJOID010000001.1	Red_deer_4_mag_18	Bacillota (Firmicutes)	75.97	1294	229	48	3	1227	1	1281	0	1746
F6GI4_26489	RUG30324_00079	CAJOOV010000016.1	Rumen_Coassembly_mag_1815	Bacillota (Firmicutes)	58.31	1137	389	46	1	1066	46	1168	0	1163
F6GI4_35263	RUG30220_01219	CAJOKT010000023.1	Reindeer_1_mag_186	Bacillota (Firmicutes)	68.06	1077	284	44	1	1019	112	1186	0	1265
F6HG2_08883	RUG30220_01219	CAJOKT010000023.1	Reindeer_1_mag_186	Bacillota (Firmicutes)	58.86	1196	421	49	11	1153	8	1185	0	1206
F6HG2_19811	RUG30363_01131	CAJOQR010000122.1	Rumen_Coassembly_mag_497	Bacillota (Firmicutes)	61.22	1176	373	43	2	1111	3	1161	0	1302
F6HG2_27890	RUG30253_00002	CAJOLU010000001.1	Reindeer_2_mag_129	Bacillota (Firmicutes)	56.59	1161	439	50	2	1100	5	1162	0	1110
F6HG2_39365	RUG30263_01332	CAJOMN010000011.1	Reindeer_2_mag_16	Bacillota (Firmicutes)	77.49	1266	217	50	1	1199	1	1265	0	1772
F6HG2_42598	RUG30269_00276	CAJOMW010000018.1	Reindeer_2_mag_174	Bacillota (Firmicutes)	63.85	1217	347	51	2	1153	1	1189	0	1360
F6HG2_46002	RUG30220_01219	CAJOKT010000023.1	Reindeer_1_mag_186	Bacillota (Firmicutes)	59.25	1200	413	49	1	1138	1	1186	0	1198
F6HG2_48981	RUG30263_01332	CAJOMN010000011.1	Reindeer_2_mag_16	Bacillota (Firmicutes)	76.81	1255	228	46	1	1193	17	1270	0	1745
F6HG2_57532	RUG30215_00723	CAJOLG010000038.1	Reindeer_1_mag_132	Bacillota (Firmicutes)	65.72	954	278	37	1	907	378	1329	0	1141
F6HG3_01271	RUG30220_01219	CAJOKT010000023.1	Reindeer_1_mag_186	Bacillota (Firmicutes)	58.78	1196	422	49	11	1153	8	1185	0	1204
F6HG3_04052	RUG30363_01131	CAJOQR010000122.1	Rumen_Coassembly_mag_497	Bacillota (Firmicutes)	61.22	1176	373	43	2	1111	3	1161	0	1302
F6HG3_07113	RUG30267_00545	CAJOMP010000011.1	Reindeer_2_mag_170	Bacillota (Firmicutes)	60.14	1267	372	50	1	1135	1	1266	0	1269
F6HG3_10320	RUG30269_00276	CAJOMW010000018.1	Reindeer_2_mag_174	Bacillota (Firmicutes)	63.85	1217	347	51	2	1153	1	1189	0	1360
F6HG3_17137	RUG30253_00002	CAJOLU010000001.1	Reindeer_2_mag_129	Bacillota (Firmicutes)	56.59	1161	439	50	2	1100	5	1162	0	1110
F6HG3_25534	RUG30215_00723	CAJOLG010000038.1	Reindeer_1_mag_132	Bacillota (Firmicutes)	62.78	1330	422	55	3	1263	4	1329	0	1506
F6HG3_33421	RUG30253_00002	CAJOLU010000001.1	Reindeer_2_mag_129	Bacillota (Firmicutes)	54.74	1233	474	56	5	1160	9	1234	0	1094
F6HG3_37584	RUG30220_01219	CAJOKT010000023.1	Reindeer_1_mag_186	Bacillota (Firmicutes)	66.04	1172	326	52	1	1103	1	1169	0	1339
F6HG3_48122	RUG30324_00079	CAJOOV010000016.1	Rumen_Coassembly_mag_1815	Bacillota (Firmicutes)	56.38	1176	448	49	4	1121	2	1170	0	1120
F6HG3_48777	RUG30220_01219	CAJOKT010000023.1	Reindeer_1_mag_186	Bacillota (Firmicutes)	59.17	1200	414	49	1	1138	1	1186	0	1197
F6HG3_51157	RUG30269_00276	CAJOMW010000018.1	Reindeer_2_mag_174	Bacillota (Firmicutes)	65.46	1239	324	46	2	1186	1	1189	0	1473
F6HG3_53828	RUG30263_01332	CAJOMN010000011.1	Reindeer_2_mag_16	Bacillota (Firmicutes)	77.49	1266	220	48	3	1204	1	1265	0	1750
F6HG3_54992	RUG30263_01332	CAJOMN010000011.1	Reindeer_2_mag_16	Bacillota (Firmicutes)	70.34	1099	261	45	4	1039	127	1223	0	1356
F6HG3_59661	RUG30220_01219	CAJOKT010000023.1	Reindeer_1_mag_186	Bacillota (Firmicutes)	66.41	1167	322	46	1	1099	1	1165	0	1341
F6HG3_66529	RUG30263_01332	CAJOMN010000011.1	Reindeer_2_mag_16	Bacillota (Firmicutes)	60.62	1229	412	49	1	1157	1	1229	0	1308
F6HG3_68892	RUG30269_00276	CAJOMW010000018.1	Reindeer_2_mag_174	Bacillota (Firmicutes)	52.99	1206	451	51	4	1105	3	1196	0	1065
F6HG3_69644	RUG30152_00019	CAJOID010000001.1	Red_deer_4_mag_18	Bacillota (Firmicutes)	75.95	1293	230	48	3	1226	1	1281	0	1750
F6HG3_75982	RUG30220_01219	CAJOKT010000023.1	Reindeer_1_mag_186	Bacillota (Firmicutes)	60.74	1103	362	44	1	1046	98	1186	0	1170
F6HG3_91016	RUG30324_00079	CAJOOV010000016.1	Rumen_Coassembly_mag_1815	Bacillota (Firmicutes)	69.91	957	235	38	4	915	250	1198	0	1187
F7GI3_07154	RUG30269_00276	CAJOMW010000018.1	Reindeer_2_mag_174	Bacillota (Firmicutes)	63.96	1254	340	57	2	1181	1	1216	0	1363
F7GI3_25025	RUG30324_00079	CAJOOV010000016.1	Rumen_Coassembly_mag_1815	Bacillota (Firmicutes)	70.75	1036	248	45	1	985	1	1032	0	1288
F7GI3_27189	RUG30363_01131	CAJOQR010000122.1	Rumen_Coassembly_mag_497	Bacillota (Firmicutes)	64.06	1163	352	45	31	1132	2	1159	0	1355
F7GI3_29521	RUG30220_01219	CAJOKT010000023.1	Reindeer_1_mag_186	Bacillota (Firmicutes)	66.7	1063	287	45	1	998	112	1172	0	1191
F7GI3_30754	RUG30324_00079	CAJOOV010000016.1	Rumen_Coassembly_mag_1815	Bacillota (Firmicutes)	69.8	1255	308	47	1	1206	1	1233	0	1545
F7HG2_57313	RUG30263_01332	CAJOMN010000011.1	Reindeer_2_mag_16	Bacillota (Firmicutes)	71.71	859	193	36	2	810	371	1229	0	1087
F7HG2_61184	RUG30263_01332	CAJOMN010000011.1	Reindeer_2_mag_16	Bacillota (Firmicutes)	75.93	1105	207	43	1	1048	161	1263	0	1486
F7HG3_33694	RUG30324_00079	CAJOOV010000016.1	Rumen_Coassembly_mag_1815	Bacillota (Firmicutes)	64.88	1193	328	49	1	1145	24	1173	0	1348
F8GI3_00489	RUG30269_00276	CAJOMW010000018.1	Reindeer_2_mag_174	Bacillota (Firmicutes)	56.9	1195	414	47	10	1116	3	1184	0	1198
F8HG2_03378	RUG30152_00019	CAJOID010000001.1	Red_deer_4_mag_18	Bacillota (Firmicutes)	54.86	1225	421	54	2	1098	4	1224	0	1112
F8HG2_08576	RUG30220_01219	CAJOKT010000023.1	Reindeer_1_mag_186	Bacillota (Firmicutes)	66.61	1174	323	47	1	1107	1	1172	0	1350
F8HG3_12930	RUG30152_00019	CAJOID010000001.1	Red_deer_4_mag_18	Bacillota (Firmicutes)	77.21	1281	219	50	3	1210	1	1281	0	1766
F5HG2_27260	RUG30040_00579	CAJODQ010000008.1	Red_deer_1_mag_74	Bacteriodota	72.45	1234	292	41	1	1186	19	1252	0	1632
F5HG2_39840	RUG30040_00579	CAJODQ010000008.1	Red_deer_1_mag_74	Bacteriodota	67.96	927	248	34	1	890	358	1272	0	1127
F5HG3_10308	RUG30040_00579	CAJODQ010000008.1	Red_deer_1_mag_74	Bacteriodota	71.93	1247	301	42	4	1201	6	1252	0	1634
F5HG3_27796	RUG30040_00579	CAJODQ010000008.1	Red_deer_1_mag_74	Bacteriodota	69.15	1287	326	46	1	1231	1	1272	0	1608
F6GI3_02897	RUG30040_00579	CAJODQ010000008.1	Red_deer_1_mag_74	Bacteriodota	70.83	1234	305	45	18	1196	21	1254	0	1608
F6GI4_21239	RUG30040_00579	CAJODQ010000008.1	Red_deer_1_mag_74	Bacteriodota	70.83	1234	305	45	18	1196	21	1254	0	1608
F6GI4_22586	RUG30040_00579	CAJODQ010000008.1	Red_deer_1_mag_74	Bacteriodota	70.09	1284	319	48	1	1231	1	1272	0	1657
F6GI4_24544	RUG30040_00579	CAJODQ010000008.1	Red_deer_1_mag_74	Bacteriodota	70.72	1284	318	42	1	1238	1	1272	0	1692
F6GI4_31630	RUG30040_00579	CAJODQ010000008.1	Red_deer_1_mag_74	Bacteriodota	69.77	1247	324	46	5	1199	7	1252	0	1647
F6HG2_00974	RUG30246_00022	CAJOLR010000001.1	Reindeer_1_mag_99	Bacteriodota	73.96	1248	269	48	2	1193	3	1250	0	1628
F6HG2_12691	RUG30170_00263	CAJOIR010000002.1	Red_deer_4_mag_39	Bacteriodota	70.31	1243	308	55	6	1187	8	1250	0	1586
F6HG2_17414	RUG30170_00263	CAJOIR010000002.1	Red_deer_4_mag_39	Bacteriodota	79.04	1250	205	53	1	1193	1	1250	0	1776
F6HG2_21071	RUG30040_00579	CAJODQ010000008.1	Red_deer_1_mag_74	Bacteriodota	68.85	1265	325	55	4	1203	7	1267	0	1533
F6HG2_35573	RUG30097_00727	CAJOFH010000009.1	Red_deer_3_mag_92	Bacteriodota	76.36	1248	242	49	1	1195	1	1248	0	1710
F6HG3_08848	RUG30246_00022	CAJOLR010000001.1	Reindeer_1_mag_99	Bacteriodota	73.96	1248	269	48	2	1193	3	1250	0	1628
F6HG3_10512	RUG30246_00022	CAJOLR010000001.1	Reindeer_1_mag_99	Bacteriodota	73.57	1245	269	51	5	1190	7	1250	0	1627
F6HG3_32111	RUG30097_00727	CAJOFH010000009.1	Red_deer_3_mag_92	Bacteriodota	76.8	901	175	32	1	867	348	1248	0	1248
F6HG3_35008	RUG30170_00263	CAJOIR010000002.1	Red_deer_4_mag_39	Bacteriodota	70.31	1243	308	55	6	1187	8	1250	0	1586
F6HG3_35525	RUG30040_00579	CAJODQ010000008.1	Red_deer_1_mag_74	Bacteriodota	68.85	1265	325	55	4	1203	7	1267	0	1533
F6HG3_38969	RUG30040_00579	CAJODQ010000008.1	Red_deer_1_mag_74	Bacteriodota	68.94	1288	330	43	1	1234	1	1272	0	1622
F6HG3_41325	RUG30079_00442	CAJOFJ010000003.1	Red_deer_3_mag_136	Bacteriodota	74.68	1264	248	62	2	1193	3	1266	0	1630
F6HG3_51726	RUG30040_00579	CAJODQ010000008.1	Red_deer_1_mag_74	Bacteriodota	71.32	959	238	34	1	922	294	1252	0	1244
F6HG3_61530	RUG30097_00727	CAJOFH010000009.1	Red_deer_3_mag_92	Bacteriodota	71.36	1250	294	53	1	1188	1	1248	0	1519
F6HG3_67632	RUG30170_00263	CAJOIR010000002.1	Red_deer_4_mag_39	Bacteriodota	79.04	1250	205	53	1	1193	1	1250	0	1776
F6HG3_82580	RUG30097_00727	CAJOFH010000009.1	Red_deer_3_mag_92	Bacteriodota	76.8	901	175	32	1	867	348	1248	0	1248
F6HG3_84619	RUG30040_00579	CAJODQ010000008.1	Red_deer_1_mag_74	Bacteriodota	78.95	1064	169	46	1	1009	189	1252	0	1496
F7GI3_35706	RUG30040_00579	CAJODQ010000008.1	Red_deer_1_mag_74	Bacteriodota	69.19	1097	278	40	1	1050	189	1272	0	1338
F7HG2_04590	RUG30040_00579	CAJODQ010000008.1	Red_deer_1_mag_74	Bacteriodota	70.38	1283	321	43	1	1235	1	1272	0	1679
F7HG2_11392	RUG30246_00022	CAJOLR010000001.1	Reindeer_1_mag_99	Bacteriodota	74.28	1244	258	53	5	1186	7	1250	0	1645
F7HG2_25765	RUG30040_00579	CAJODQ010000008.1	Red_deer_1_mag_74	Bacteriodota	69.6	1283	328	44	1	1232	1	1272	0	1631
F7HG2_33985	RUG30040_00579	CAJODQ010000008.1	Red_deer_1_mag_74	Bacteriodota	70.89	1247	309	46	5	1198	7	1252	0	1657
F7HG2_38952	RUG30040_00579	CAJODQ010000008.1	Red_deer_1_mag_74	Bacteriodota	69.86	1284	326	42	1	1235	1	1272	0	1659
F7HG2_56004	RUG30097_00727	CAJOFH010000009.1	Red_deer_3_mag_92	Bacteriodota	77.54	1251	230	45	1	1203	1	1248	0	1786
F7HG2_87565	RUG30040_00579	CAJODQ010000008.1	Red_deer_1_mag_74	Bacteriodota	68.52	953	254	32	1	918	331	1272	0	1182
F7HG3_02108	RUG30040_00579	CAJODQ010000008.1	Red_deer_1_mag_74	Bacteriodota	70.38	1283	321	43	1	1235	1	1272	0	1679
F7HG3_04002	RUG30246_00022	CAJOLR010000001.1	Reindeer_1_mag_99	Bacteriodota	74.28	1244	258	53	5	1186	7	1250	0	1645
F7HG3_22458	RUG30097_00727	CAJOFH010000009.1	Red_deer_3_mag_92	Bacteriodota	77.54	1251	230	45	1	1203	1	1248	0	1787
F7HG3_23394	RUG30040_00579	CAJODQ010000008.1	Red_deer_1_mag_74	Bacteriodota	70.23	1283	319	47	1	1231	1	1272	0	1655
F7HG3_36671	RUG30040_00579	CAJODQ010000008.1	Red_deer_1_mag_74	Bacteriodota	70.89	1247	309	46	19	1212	7	1252	0	1659
F7HG3_46158	RUG30040_00579	CAJODQ010000008.1	Red_deer_1_mag_74	Bacteriodota	68.24	954	257	31	1	920	331	1272	0	1186
F8HG3_02519	RUG30040_00579	CAJODQ010000008.1	Red_deer_1_mag_74	Bacteriodota	69.21	1283	334	44	1	1233	1	1272	0	1641
F8HG3_306618	RUG30040_00579	CAJODQ010000008.1	Red_deer_1_mag_74	Bacteriodota	70.79	1157	282	40	1	1113	128	1272	0	1487
F6HG2_18020	RUG30251_01993	CAJOMG010000069.1	Reindeer_2_mag_125	Deltaproteobacteria	76.33	1242	258	36	124	1329	1	1242	0	1767
F7GI3_00251	RUG30251_01993	CAJOMG010000069.1	Reindeer_2_mag_125	Deltaproteobacteria	72.24	1243	298	40	131	1334	1	1235	0	1626
F7GI3_02098	RUG30251_01993	CAJOMG010000069.1	Reindeer_2_mag_125	Deltaproteobacteria	71.73	1245	297	42	131	1330	1	1235	0	1662
F7HG2_00019	RUG30251_01993	CAJOMG010000069.1	Reindeer_2_mag_125	Deltaproteobacteria	79.98	1244	211	34	124	1329	1	1244	0	1903
F7HG2_83452	RUG30251_01993	CAJOMG010000069.1	Reindeer_2_mag_125	Deltaproteobacteria	73.22	1042	241	35	1	1007	198	1236	0	1420
F7HG3_04551	RUG30251_01993	CAJOMG010000069.1	Reindeer_2_mag_125	Deltaproteobacteria	79.98	1244	211	34	124	1329	1	1244	0	1903
F5GI2_06898	WP_096630183.1	WP_096630183.1	saturation salinity, mud sample	Gammaproteobacteria	88.29	1341	108	44	1	1292	1	1341	0	2184
F5GI2_07493	WP_005433641.1	WP_005433641.1	shrimp host (market)	Gammaproteobacteria	95.75	1342	6	47	1	1291	1	1342	0	2311
F5GI3_07283	WP_096630183.1	WP_096630183.1	saturation salinity, mud sample	Gammaproteobacteria	88.29	1341	108	44	1	1292	1	1341	0	2184
F5GI3_09182	WP_005433641.1	WP_005433641.1	shrimp host (market)	Gammaproteobacteria	95.75	1342	6	47	1	1291	1	1342	0	2311
F5HG2_10485	WP_096630183.1	WP_096630183.1	saturation salinity, mud sample	Gammaproteobacteria	88.29	1341	108	44	1	1292	1	1341	0	2184
F5HG2_14731	WP_005433641.1	WP_005433641.1	shrimp host (market)	Gammaproteobacteria	95.75	1342	6	47	1	1291	1	1342	0	2311
F5HG3_22946	WP_005433641.1	WP_005433641.1	shrimp host (market)	Gammaproteobacteria	95.75	1342	6	47	1	1291	1	1342	0	2311
F5HG3_32316	WP_096630183.1	WP_096630183.1	saturation salinity, mud sample	Gammaproteobacteria	88.29	1341	108	44	1	1292	1	1341	0	2184
F6GI4_12307	WP_005433641.1	WP_005433641.1	shrimp host (market)	Gammaproteobacteria	93	1342	41	48	1	1289	1	1342	0	2247
F6HG2_20211	WP_087112179.1	WP_087112179.1	marine sponge of the genus Haliclona	Gammaproteobacteria	89.07	1363	88	53	1	1306	1	1359	0	2200
F6HG2_20239	WP_096630183.1	WP_096630183.1	saturation salinity, mud sample	Gammaproteobacteria	88.74	1341	102	43	1	1292	1	1341	0	2200
F6HG3_28244	WP_096630183.1	WP_096630183.1	saturation salinity, mud sample	Gammaproteobacteria	88.74	1341	102	43	1	1292	1	1341	0	2200
F6HG3_33325	WP_087112179.1	WP_087112179.1	marine sponge of the genus Haliclona	Gammaproteobacteria	89.07	1363	88	53	1	1306	1	1359	0	2200
F7GI2_01400	WP_096630183.1	WP_096630183.1	saturation salinity, mud sample	Gammaproteobacteria	88.29	1341	108	44	1	1292	1	1341	0	2184
F7GI3_30002	WP_028117235.1	WP_028117235.1	slime of a puffer fish	Gammaproteobacteria	90.22	1104	58	46	1	1054	238	1341	0	1784
F7HG2_30021	WP_087112179.1	WP_087112179.1	marine sponge of the genus Haliclona	Gammaproteobacteria	89.07	1363	88	53	1	1306	1	1359	0	2200
F8GI2_00504	WP_096630183.1	WP_096630183.1	saturation salinity, mud sample	Gammaproteobacteria	88.29	1341	108	44	1	1292	1	1341	0	2184
F8GI2_01924	WP_005433641.1	WP_005433641.1	shrimp host (market)	Gammaproteobacteria	95.75	1342	6	47	1	1291	1	1342	0	2311
F8GI3_00006	WP_028117235.1	WP_028117235.1	slime of a puffer fish	Gammaproteobacteria	90.98	1341	64	53	1	1284	1	1341	0	2216
F8GI3_01264	WP_005433641.1	WP_005433641.1	shrimp host (market)	Gammaproteobacteria	95.83	1342	5	47	1	1291	1	1342	0	2313
F8HG2_03825	WP_096630183.1	WP_096630183.1	saturation salinity, mud sample	Gammaproteobacteria	88.29	1341	108	44	1	1292	1	1341	0	2184
F8HG3_327601	WP_096630183.1	WP_096630183.1	saturation salinity, mud sample	Gammaproteobacteria	91.6	1158	97	0	1	1114	184	1341	0	2105.1
F7HG2_43603	RUG30176_00317	CAJOJE010000001.1	Red_deer_4_mag_70	Melainabacteria	83.39	1102	141	38	1	1060	1	1102	0	1676
F5GI3_09761	SFB68422.1	SFB68422.1	cultured isolate from hypersaline microbial mat (anoxic, sulfidic layer)	Spirochaetes	78.77	1173	190	49	1	1114	1	1173	0	1629
F6HG2_31684	RUG30335_00745	CAJOPO010000166.1	Rumen_Coassembly_mag_2196	Spirochaetes	72.1	914	205	33	1	865	261	1173	0	1229
F6HG2_35669	RUG30335_00745	CAJOPO010000166.1	Rumen_Coassembly_mag_2196	Spirochaetes	72.17	1168	263	49	9	1118	10	1173	0	1532
F6HG3_33699	RUG30335_00745	CAJOPO010000166.1	Rumen_Coassembly_mag_2196	Spirochaetes	71.6	1176	271	45	1	1116	1	1173	0	1557
F7GI3_09757	RUG30335_00745	CAJOPO010000166.1	Rumen_Coassembly_mag_2196	Spirochaetes	52.49	1166	478	40	12	1107	2	1161	0	1072
F7GI3_35321	RUG30335_00745	CAJOPO010000166.1	Rumen_Coassembly_mag_2196	Spirochaetes	52.94	1090	438	40	1	1022	71	1153	0	1007
F8GI3_01520	SFB68422.1	SFB68422.1	cultured isolate of mammalian pathogen, also observed in trout gut	Spirochaetes	78.35	1173	195	50	1	1114	1	1173	0	1621
F6GI4_01922	Kiritimatiella glycovorans	WP_052882241.1	cultured isolate from hypersaline microbial mat	Verrucomicrobiota	76.02	1251	265	34	1	1249	1	1218	0	1824
F6HG3_14785	Kiritimatiella glycovorans	WP_052882241.1	cultured isolate from hypersaline microbial mat (anoxic, sulfidic layer)	Verrucomicrobiota	76.02	1251	265	34	1	1249	1	1218	0	1824
F6HG3_85647	Lentimonas_CC4	WP_162027363.1	MAG from marine sediment	Verrucomicrobiota	62.82	963	290	38	3	932	315	1242	0	1056
F7HG2_29493	Lentimonas_CC4	WP_162027363.1	MAG from marine sediment	Verrucomicrobiota	63.16	893	257	38	1	859	388	1242	0	961
F7HG3_14925	Lentimonas_CC4	WP_162027363.1	MAG from marine sediment	Verrucomicrobiota	59.44	1282	432	51	7	1242	3	1242	0	1305
