# Supplementary material for: Herbivorous fish microbiome adaptations to sulfated dietary polysaccharides
Source: Research Square preprint supplement (doi:10.21203/rs.3.rs-1754689/v1), 2022-06-21
Supplement: Supplementary file 8 [file 52addb6cbce7cc5eba206196.xlsx]

## Sheet: Sheet1
Additional file 1. Table of metagenomic assembly statistics.
Additional descriptive information for these samples is provided in Sparagon et al 2022.
Abbreviations: nt, nucleotides; MBp megabase pairs; ctg, contig: cds, coding sequences.
sample	Host	input reads	total assembled mbp	num ctgs > 2K	n50	max ctg len	num CDS
F5_GI2	K. vaigiensis	2698277	15.0019	1969	23059	526929	13181
F5_GI3	K. vaigiensis	4102394	23.0268	3936	8615	527929	20400
F5_HG2	K. vaigiensis	7536952	72.4754	16775	4391	449289	61118
F5_HG3	K. vaigiensis	19492758	125.512	29576	4330	525780	105177
F6_GI1	K. cinerascens	3560815	13.1396	5395	2331	16589	18256
F6_GI4	K. cinerascens	4747781	61.07	13366	4907	146449	52084
F6_HG2	K. cinerascens	8127656	92.1096	18499	5873	190549	79206
F6_HG3	K. cinerascens	19495376	138.105	27528	6196	266054	118239
F7_GI2	K. hawaiiensis	704704	3.02289	310	25695	152318	2367
F7_GI3	K. hawaiiensis	8549694	88.2582	24099	3439	143436	58693
F7_HG2	K. hawaiiensis	12822893	157.229	37465	4349	132058	128250
F7_HG3	K. hawaiiensis	7737094	90.7698	22765	3982	89360	74390
F8_GI2	K. vaigiensis	3482016	10.9102	3751	2601	41701	8798
F8_GI3	K. vaigiensis	7512996	130.641	46627	2705	50725	127886
F8_HG2	K. vaigiensis	5300237	31.6653	8396	3547	109684	27319
F8_HG3	K. vaigiensis	15253589	473.733	116960	4360	100420	536838
Total	all samples	131125232	1526.67	377417	na	527929	1432202
