# Supplementary material for: Herbivorous fish microbiome adaptations to sulfated dietary polysaccharides
Source: Research Square preprint supplement (doi:10.21203/rs.3.rs-1754689/v1), 2022-06-21
Supplement: Supplementary file 9 [file 8d55312c55990c5e89461c25.xlsx]

## Sheet: Suppl Tbl 4
Additional File 13.
Glucanase-containing CAZy classes.
Relative abundances of CAZy classes that include β-1,3- and/or β-1,4- glucanase activities were analyzed in kyphosid fish gut and terrestrial ruminant metagenomes.
Abbreviations: avg norm, group average normalized per 1 million predicted proteins; F567, adult kyphosid fish; rum, terrestrial ruminant MAGs; HG, hindgut.
Full data and significance calculations are provided in Additional File 12.
CAZy id	avg norm F567	avg norm rum	t-test p-value	pct fish matches in HG compart-ment	pct fish matches w/export signal	pct rum matches w/export signal	CAZy class annotation
GH16_3	42.9704	35.6237	0.365	0.911765	0.32	0.548387	endo-β-1,4-galactosidase (EC 3.2.1.-);β-glucosidase (EC 3.2.1.21);endo-β-1,3-glucanase / laminarinase (EC 3.2.1.39); endo-β-1,3(4)-glucanase / lichenase-laminarinase (EC 3.2.1.6);lichenase / endo-β-1,3-1,4-glucanase (EC 3.2.1.73)
GH16_21	21.3467	11.42	0.159	0.647059	0.71	0.5	β-glycosidase (EC 3.2.1.-);endo-β-1,3(4)-glucanase / lichenase-laminarinase (EC 3.2.1.6);lichenase / endo-β-1,3-1,4-glucanase (EC 3.2.1.73)
GH3	497.375	1050.56	0.089	0.885	0.323529	0.39364	β-glucosidase (EC 3.2.1.21); xylan 1,4-β-xylosidase (EC 3.2.1.37); β-glucosylceramidase (EC 3.2.1.45); β-N-acetylhexosaminidase (EC 3.2.1.52); α-L-arabinofuranosidase (EC 3.2.1.55); glucan 1,4-β-glucosidase (EC 3.2.1.74); isoprimeverose-producing oligoxyloglucan hydrolase (EC 3.2.1.120); coniferin β-glucosidase (EC 3.2.1.126); exo-1,3-1,4-glucanase (EC 3.2.1.-); β-N-acetylglucosaminide phosphoryl…
GH9	75.1859	155.771	0.044	0.87931	0.568966	0.444444	endoglucanase (EC 3.2.1.4); endo-β-1,3(4)-glucanase / lichenase-laminarinase (EC 3.2.1.6); lichenase / endo-β-1,3-1,4-glucanase (EC 3.2.1.73); exo-β-1,4-glucanase / cellodextrinase (EC 3.2.1.74); cellobiohydrolase (EC 3.2.1.91); xyloglucan-specific endo-β-1,4-glucanase / endo-xyloglucanase (EC 3.2.1.151); exo-β-glucosaminidase (EC 3.2.1.165); endo-β-1,4-glucanase (xanthanase) (EC 3.2.1.-)
GH8	12.2776	53.1922	0.068	1	0.5	0.5	β-glucosidase (EC 3.2.1.21); xylan 1,4-β-xylosidase (EC 3.2.1.37); β-N-acetylhexosaminidase (EC 3.2.1.52); glucan 1,3-β-glucosidase (EC 3.2.1.58); glucan 1,4-β-glucosidase (EC 3.2.1.74); exo-1,3-1,4-glucanase (EC 3.2.1.-); α-L-arabinofuranosidase (EC 3.2.1.55).
GH5_4	0	18.0385	na	na	na	0.125	β-glycosidase (EC 3.2.1.-);glucomannan-specific endo-β-1,4-glucanase (EC 3.2.1.-);[retaining] exo-xyloglucanase (EC 3.2.1.-);xyloglucan-specific endo-β-1,4-glucanase / endo-xyloglucanase (EC 3.2.1.151);endo-β-1,4-glucanase (EC 3.2.1.4);endo-β-1,3(4)-glucanase / lichenase-laminarinase (EC 3.2.1.6);lichenase / endo-β-1,3-1,4-glucanase (EC 3.2.1.73);endo-β-1,4-xylanase (EC 3.2.1.8)
GH64	0	11.016	na	na	na	0.25	β-1,3-glucanase (EC 3.2.1.39)

## Sheet: CAZy glycanase classes
CAZy id	F567 prots per 1e6	rum prots per 1e6	p-value	pct fish mathes in HG compart-ment	pct fish mathes w/export signal	pct rum mathes w/export signal	CAZy class annotation	substrate specificity
GH16_3 (LAM1)	42.9704	35.6237	0.365				endo-β-1,4-galactosidase (EC 3.2.1.-);β-glucosidase (EC 3.2.1.21);endo-β-1,3-glucanase / laminarinase (EC 3.2.1.39); endo-β-1,3(4)-glucanase / lichenase-laminarinase (EC 3.2.1.6);lichenase / endo-β-1,3-1,4-glucanase (EC 3.2.1.73)	laminarinase/glucanase/galactanase
GH16_21 (LAM2)	21.3467	11.42	0.159				β-glycosidase (EC 3.2.1.-);endo-β-1,3(4)-glucanase / lichenase-laminarinase (EC 3.2.1.6);lichenase / endo-β-1,3-1,4-glucanase (EC 3.2.1.73)	laminarinase/lichenase (fungal)
GH3	497.375	1050.56	0.089				β-glucosidase (EC 3.2.1.21); xylan 1,4-β-xylosidase (EC 3.2.1.37); β-glucosylceramidase (EC 3.2.1.45); β-N-acetylhexosaminidase (EC 3.2.1.52); α-L-arabinofuranosidase (EC 3.2.1.55); glucan 1,4-β-glucosidase (EC 3.2.1.74); isoprimeverose-producing oligoxyloglucan hydrolase (EC 3.2.1.120); coniferin β-glucosidase (EC 3.2.1.126); exo-1,3-1,4-glucanase (EC 3.2.1.-); β-N-acetylglucosaminide phosphoryl…	β-glucosidase
GH9	75.1859	155.771	0.044				endoglucanase (EC 3.2.1.4); endo-β-1,3(4)-glucanase / lichenase-laminarinase (EC 3.2.1.6); lichenase / endo-β-1,3-1,4-glucanase (EC 3.2.1.73); exo-β-1,4-glucanase / cellodextrinase (EC 3.2.1.74); cellobiohydrolase (EC 3.2.1.91); xyloglucan-specific endo-β-1,4-glucanase / endo-xyloglucanase (EC 3.2.1.151); exo-β-glucosaminidase (EC 3.2.1.165); endo-β-1,4-glucanase (xanthanase) (EC 3.2.1.-)	cellulase family E
GH8	12.2776	53.1922	0.068				β-glucosidase (EC 3.2.1.21); xylan 1,4-β-xylosidase (EC 3.2.1.37); β-N-acetylhexosaminidase (EC 3.2.1.52); glucan 1,3-β-glucosidase (EC 3.2.1.58); glucan 1,4-β-glucosidase (EC 3.2.1.74); exo-1,3-1,4-glucanase (EC 3.2.1.-); α-L-arabinofuranosidase (EC 3.2.1.55).	cellulase family D
GH5_4	0	18.0385	na				β-glycosidase (EC 3.2.1.-);glucomannan-specific endo-β-1,4-glucanase (EC 3.2.1.-);[retaining] exo-xyloglucanase (EC 3.2.1.-);xyloglucan-specific endo-β-1,4-glucanase / endo-xyloglucanase (EC 3.2.1.151);endo-β-1,4-glucanase (EC 3.2.1.4);endo-β-1,3(4)-glucanase / lichenase-laminarinase (EC 3.2.1.6);lichenase / endo-β-1,3-1,4-glucanase (EC 3.2.1.73);endo-β-1,4-xylanase (EC 3.2.1.8)	general glycosyl hydrolase
GH64	0	11.016	na				β-1,3-glucanase (EC 3.2.1.39)	1,3 glucanase (unbranched?)
GH5_47	0	0	na				endo-b-1,3-glucanase / laminarinase (EC 3.2.1.39);endo-b-1,6-glucanase (EC 3.2.1.75)	general glycosyl hydrolase
GH5							endo-β-1,4-glucanase / cellulase (EC 3.2.1.4); endo-β-1,4-xylanase (EC 3.2.1.8); β-glucosidase (EC 3.2.1.21); β-mannosidase (EC 3.2.1.25); β-glucosylceramidase (EC 3.2.1.45); glucan β-1,3-glucosidase (EC 3.2.1.58); exo-β-1,4-glucanase / cellodextrinase (EC 3.2.1.74); glucan endo-1,6-β-glucosidase (EC 3.2.1.75); mannan endo-β-1,4-mannosidase (EC 3.2.1.78); cellulose β-1,4-cellobiosidase (EC 3.2.1.…	cellulose family A (PF00150)
GH6							endoglucanase (EC 3.2.1.4); cellobiohydrolase (EC 3.2.1.91); lichenase / endo-β-1,3-1,4-glucanase (EC 3.2.1.73);	cellulase family B
GH7							endo-β-1,4-glucanase (EC 3.2.1.4); reducing end-acting cellobiohydrolase (EC 3.2.1.176); chitosanase (EC 3.2.1.132); endo-β-1,3-1,4-glucanase (EC 3.2.1.73)	cellulase family C
GH10							Activities in Family endo-1,4-β-xylanase (EC 3.2.1.8); endo-1,3-β-xylanase (EC 3.2.1.32); tomatinase (EC 3.2.1.-); xylan endotransglycosylase (EC 2.4.2.-); endo-β-1,4-glucanase (EC 3.2.1.4); [retaining] arabinoxylan-specific endo-β-1,4-xylanase (EC 3.2.1.-); oligosaccharide reducing-end xylanase (EC 3.2.1.156)	cellulase family F
GH48	3.54202	0	0.11				reducing end-acting cellobiohydrolase (EC 3.2.1.176); endo-β-1,4-glucanase (EC 3.2.1.4); chitinase (EC 3.2.1.14); cellobiohydrolase (EC 3.2.1.91)	cellulase family L
GH11	0	2.79185	0.241				endo-β-1,4-xylanase (EC 3.2.1.8); exo-1,4-β-xylosidase (EC 3.2.1.-)	cellulase family G
GH44	9.44538	15.1281	0.377				endoglucanase (EC 3.2.1.4); xyloglucanase (EC 3.2.1.151)	cellulase family J
GH45	0	4.18778	0.241				endoglucanase (EC 3.2.1.4); xyloglucan-specific endo-β-1,4-glucanase / endo-xyloglucanase (EC 3.2.1.151); endo-β-1,4-mannanase (EC 3.2.1.78)	cellulase family K
GH5_37	1	0	na				b-glycosidase (EC 3.2.1.-);endo-b-1,4-glucanase (EC 3.2.1.4);lichenase / endo-b-1,3-1,4-glucanase (EC 3.2.1.73);exo-b-1,4-glucanase / cellodextrinase (EC 3.2.1.74)
GH12							endoglucanase (EC 3.2.1.4); xyloglucan hydrolase (EC 3.2.1.151); β-1,3-1,4-glucanase (EC 3.2.1.73); xyloglucan endotransglycosylase (EC 2.4.1.207)	cellulase family H
GH30_3	8.48408	6.01959	0.328				b-1,6-glucosidase (EC 3.2.1.-);endo-b-1,6-glucanase (EC 3.2.1.75)	Starch (1,6 linkage)
GH5_38							α-mannosidase (EC 3.2.1.24); mannosyl-oligosaccharide α-1,2-mannosidase (EC 3.2.1.113); mannosyl-oligosaccharide α-1,3-1,6-mannosidase (EC 3.2.1.114); mannosyl-oligosaccharide α-1,3-mannosidase (EC 3.2.1.207); mannosyl-oligosaccharide α-1,6-mannosidase / exo-α-1,6-mannosidase (EC 3.2.1.163)
GH155	0	0					endo-β-1,3-glucanase (EC 3.2.1.39); laminarin-degrading enzyme (EC 3.2.1.-); hesperidin 6-O-α-L-rhamnosyl-β-glucosidase (EC 3.2.1.168)	Deleted family!
EC website text
Glycoside hydrolases (EC 3.2.1.-) are a widespread group of enzymes which hydrolyse the glycosidic bond between two or more carbohydrates or between a carbohydrate and a non-carbohydrate moiety
The IUBMB Enzyme nomenclature of glycoside hydrolases is based on their substrate specificity and occasionally on their molecular mechanism; .
such a classification does not reflect (and was not intended to) the structural features of these enzymes.
A classification of glycoside hydrolases in families based on amino acid sequence similarities has been proposed a few years ago
Because there is a direct relationship between sequence and folding similarities, such a classification:
(i) reflects the structural features of these enzymes better than their sole substrate specificity,
(ii) helps to reveal the evolutionary relationships between these enzymes,
(iii) provides a convenient tool to derive mechanistic information [1] [2]
(iv) illustrates the difficulty of deriving relationships between family membership and substrate specificity

## Sheet: glucose polymer substrates
sugar linkage(s)	polysaccharide(s)	source
1,3 β-glucose (unbranched)	curdlan (bacterial capsular component)	bacteria
1,4 β-glucose (unbranched)	cellulose	plants, algae, tunicates, bacteria
1,3 and 1,4 β-glucose (branched)	laminarin and other β-glycans	plants, algae
1,3 and 1,6 β-glucose (branched)	β-glycans	fungi
1,3 and 1,6 β-glucose (cyclic)	bacterial capsular component	bacteria
1,3 and 1,2 β-glucose (branched)	bacterial capsular component	bacteria
β(1–4) N-acetyl glucosamine	chitin/chotosan	animal
α(1,6) glucose	amylose (starch)	animal
α(1,6) and α(1,4) (cross-linked) glucose	amylopectin	animal
α(1,6) and 1,3 ) (cross-linked) glucose	dextran	bacteria
https://www.wikidoc.org/index.php/Beta-glucan
