# Supplementary material for: Herbivorous fish microbiome adaptations to sulfated dietary polysaccharides
Source: Research Square preprint supplement (doi:10.21203/rs.3.rs-1754689/v1), 2022-06-21
Supplement: Supplementary file 10 [file cbfbd44f87b1e79cc76ae352.xlsx]

## Sheet: Fish5678 prokka compartments
Additional File 5.
Relative abundance calculations for predicted protein annotation keywords in fish gut and ruminant MAG samples.
Abundance calculations were normalized according to total numbers of predicted proteins obtained in each assembled sample (Additional Files 6-10).
esults have been sorted in order of compartmental differences, from highest relative abundance in hindgut to highest relative abundance in foregut.
Prokka annotation	F5GI raw	F6GI raw	F7GI raw	F5HG raw	F6HG raw	F7HG raw	F8GI raw	F8HG raw	F5GI per 1M	F6GI per 1M	F7GI per 1M	F8GI per 1M	F5HG per 1M	F6HG per 1M	F7HG per 1M	F8HG per 1M	diff p-value F5+6+7 1-sided, homo-scedastic	F5,6,7 total norm	avg GI F5,6,7 per 1M	avg HG F5,6,7 per 1M	diff GI-HG F5,6,7
Arylsulfatase	12	275	53	741	669	1377	3	155	353.565	3356.28	861.033	21.8823	4439.68	3356.41	6778.01	274.35	0.0359301	19166.9	1523.63	4858.03	-3334.41
TonB-dependent receptor SusC		201		278	586	553		72	0	2453.13	0	0	1665.63	2940	2722.03	127.44	0.0739319	9780.79	817.711	2442.55	-1624.84
Beta-galactosidase	7	54	17	175	172	389	3	58	206.246	659.051	276.18	21.8823	1048.51	862.934	1914.78	102.66	0.0322476	4989.58	380.493	1275.41	-894.913
Sensor histidine kinase YpdA	4	25	10	175	65	195		29	117.855	305.116	162.459	0	1048.51	326.109	959.849	51.33	0.0338313	2919.89	195.143	778.155	-583.011
Choline-sulfatase		34	21	156	79	232		36	0	414.958	341.164	0	934.669	396.348	1141.97	63.72	0.0446778	3229.11	252.041	824.33	-572.29
Beta-galactosidase BoGH2A		63	23	86	155	301		14	0	768.893	373.656	0	515.266	777.644	1481.61	24.78	0.104693	3917.07	380.849	924.841	-543.992
Thiol-disulfide oxidoreductase ResA	3	63	8	125	153	206		27	88.3913	768.893	129.967	0	748.934	767.61	1013.99	47.79	0.0474885	3517.79	329.084	843.512	-514.429
Putative fimbrium subunit Fim1C		21		41	23	274		20	0	256.298	0	0	245.65	115.392	1348.71	35.4	0.146461	1966.05	85.4325	569.918	-484.485
putative zinc protease	7	58	25	130	128	270	2	40	206.246	707.87	406.147	14.5882	778.891	642.183	1329.02	70.8	0.0678159	4084.95	440.088	916.699	-476.611
Tyrosine recombinase XerD	26	79	64	272	216	297	7	78	766.058	964.167	1039.74	51.0587	1629.68	1083.68	1461.92	138.06	0.0303668	6996.31	923.321	1391.76	-468.442
Phenylacetate-coenzyme A ligase		12	5	71	85	154		25	0	146.456	81.2295	0	425.394	426.45	758.034	44.25	0.00886822	1837.56	75.8951	536.626	-460.731
Xylosidase/arabinosidase		19	5	60	84	177		15	0	231.888	81.2295	0	359.488	421.433	871.247	26.55	0.0316247	1965.29	104.373	550.723	-446.35
putative CtpA-like serine protease	1	27	5	68	101	174	1	26	29.4638	329.525	81.2295	7.29411	407.42	506.723	856.48	46.02	0.0272517	2218.14	146.74	590.208	-443.468
Vitamin B12 transporter BtuB	4	34	12	85	100	205	6	35	117.855	414.958	194.951	43.7646	509.275	501.706	1009.07	61.95	0.0430055	2791.58	242.588	673.351	-430.763
L-fucose-proton symporter		21	1	74	63	153	1	19	0	256.298	16.2459	7.29411	443.369	316.075	753.112	33.63	0.0274848	1792.39	90.8478	504.185	-413.337
Outer membrane protein assembly factor BamA	5	28	12	67	117	178	4	23	147.319	341.73	194.951	29.1764	401.428	586.996	876.17	40.71	0.0292951	2577.77	228	621.531	-393.531
2-oxoglutarate oxidoreductase subunit KorA		19	3	58	76	147		18	0	231.888	48.7377	0	347.505	381.296	723.578	31.86	0.0243227	1733.01	93.542	484.127	-390.585
Glutamine-dependent NAD(+) synthetase	7	30	13	90	95	186	3	29	206.246	366.139	211.197	21.8823	539.232	476.621	915.548	51.33	0.0298133	2736.87	261.194	643.8	-382.606
ATP-dependent DNA helicase RecQ	9	31	14	97	133	154	6	33	265.174	378.344	227.443	43.7646	581.172	667.269	758.034	58.41	0.00259029	2921.2	290.32	668.825	-378.505
Iron-sulfur cluster carrier protein	7	32	4	81	134	121	3	23	206.246	390.549	64.9836	21.8823	485.309	672.286	595.598	40.71	0.014351	2436.85	220.593	584.398	-363.805
Outer membrane protein OprM	2	18	5	78	44	155		30	58.9275	219.684	81.2295	0	467.335	220.751	762.957	53.1	0.0458249	1810.88	119.947	483.681	-363.734
Long-chain-fatty-acid--CoA ligase FadD15	8	22	9	68	121	136	6	25	235.71	268.502	146.213	43.7646	407.42	607.064	669.433	44.25	0.00836059	2378.11	216.808	561.306	-344.497
2-isopropylmalate synthase	6	22	20	80	95	170	4	18	176.783	268.502	324.918	29.1764	479.317	476.621	836.791	31.86	0.0276027	2592.11	256.734	597.576	-340.842
LL-diaminopimelate aminotransferase	1	26	21	74	121	134		28	29.4638	317.321	341.164	0	443.369	607.064	659.588	49.56	0.0231555	2397.97	229.316	570.007	-340.691
2-oxoglutarate oxidoreductase subunit KorB		23	12	61	80	145		21	0	280.707	194.951	0	365.48	401.365	713.734	37.17	0.036302	1956.24	158.553	493.526	-334.973
putative protease YdcP	18	51	43	129	173	246	4	37	530.348	622.437	698.574	29.1764	772.899	867.951	1210.89	65.49	0.0390658	4732.27	617.119	950.579	-333.459
DNA gyrase subunit A	16	57	35	123	210	189	6	32	471.42	695.665	568.606	43.7646	736.951	1053.58	930.315	56.64	0.0217689	4500.3	578.564	906.949	-328.385
Xylulose kinase	2	23	10	96	86	95		18	58.9275	280.707	162.459	0	575.181	431.467	467.619	31.86	0.00687612	1976.36	167.364	491.422	-324.058
Methionine synthase	5	22	23	82	93	163	5	20	147.319	268.502	373.656	36.4705	491.3	466.586	802.335	35.4	0.0312409	2586.17	263.159	586.741	-323.582
Efflux pump membrane transporter BepE	10	30	5	72	52	206	4	26	294.638	366.139	81.2295	29.1764	431.386	260.887	1013.99	46.02	0.128676	2477.45	247.336	568.756	-321.42
Peptidoglycan O-acetyltransferase	5	26	23	124	77	136		17	147.319	317.321	373.656	0	742.942	386.313	669.433	30.09	0.0335182	2636.98	279.432	599.563	-320.131
Ribosomal RNA small subunit methyltransferase I	14	36	28	111	125	196	4	32	412.493	439.367	454.885	29.1764	665.053	627.132	964.771	56.64	0.0210626	3592.88	435.582	752.319	-316.737
tRNA-specific 2-thiouridylase MnmA	12	37	25	92	133	188	5	30	353.565	451.572	406.147	36.4705	551.215	667.269	925.393	53.1	0.0264027	3391.63	403.762	714.625	-310.864
Cytosol non-specific dipeptidase	10	32	6	68	106	157	4	22	294.638	390.549	97.4754	29.1764	407.42	531.808	772.801	38.94	0.0437895	2523.87	260.887	570.676	-309.789
Acetylxylan esterase	3	21	10	68	33	173	1	23	88.3913	256.298	162.459	7.29411	407.42	165.563	851.558	40.71	0.106533	1938.98	169.049	474.847	-305.798
Aldose 1-epimerase	9	40	17	94	110	164	3	23	265.174	488.186	276.18	21.8823	563.198	551.876	807.257	40.71	0.0272267	2973.75	343.18	640.777	-297.597
UvrABC system protein A	12	43	31	112	129	194	5	30	353.565	524.8	503.623	36.4705	671.044	647.2	954.926	53.1	0.0288309	3691.63	460.663	757.724	-297.061
Membrane-bound lytic murein transglycosylase D	7	21	14	65	86	154	4	22	206.246	256.298	227.443	29.1764	389.445	431.467	758.034	38.94	0.032533	2298.11	229.995	526.316	-296.32
S-adenosylmethionine:tRNA ribosyltransferase-isomerase	11	38	34	101	131	194	6	31	324.101	463.777	552.361	43.7646	605.138	657.235	954.926	54.87	0.0418876	3601.3	446.746	739.1	-292.354
Peptidoglycan-N-acetylglucosamine deacetylase	2	26		51	86	103	2	14	58.9275	317.321	0	14.5882	305.565	431.467	506.997	24.78	0.0319201	1634.87	125.416	414.676	-289.26
Xylan 1%2C4-beta-xylosidase	1	13	2	44	52	114		14	29.4638	158.66	32.4918	0	263.625	260.887	561.142	24.78	0.0281553	1306.27	73.5387	361.885	-288.346
Glutamate synthase [NADPH] small chain	12	46	38	133	145	175	6	34	353.565	561.414	617.344	43.7646	796.865	727.473	861.403	60.18	0.016552	3961.83	510.774	795.247	-284.473
Electron transport complex subunit RnfC	5	17	16	66	90	124	1	20	147.319	207.479	259.934	7.29411	395.437	451.535	610.365	35.4	0.00881166	2079.36	204.911	485.779	-280.868
tRNA (guanosine(18)-2'-O)-methyltransferase	6	20	7	63	45	157	5	29	176.783	244.093	113.721	36.4705	377.462	225.768	772.801	51.33	0.0845145	1947.1	178.199	458.677	-280.478
Uridine kinase	9	28	12	78	101	135	7	20	265.174	341.73	194.951	51.0587	467.335	506.723	664.511	35.4	0.00966441	2491.48	267.285	546.189	-278.904
Alanine racemase 1	1	21	10	60	72	110		18	29.4638	256.298	162.459	0	359.488	361.228	541.453	31.86	0.0192342	1710.39	149.407	420.723	-271.316
Beta-hexosaminidase	8	35	5	85	88	123	4	27	235.71	427.163	81.2295	29.1764	509.275	441.501	605.443	47.79	0.0354665	2329.5	248.034	518.74	-270.706
N-acetylglucosaminyl-diphospho-decaprenol L-rhamnosyltransferase	1	29	7	50	82	120	2	8	29.4638	353.935	113.721	14.5882	299.573	411.399	590.676	14.16	0.0530641	1813.36	165.707	433.883	-268.176
ABC transporter ATP-binding protein NatA		24	9	67	106	63	1	14	0	292.912	146.213	7.29411	401.428	531.808	310.105	24.78	0.0325695	1689.76	146.375	414.447	-268.072
SusD-like protein		68		86	64	162		14	0	829.916	0	0	515.266	321.092	797.413	24.78	0.217577	2463.69	276.639	544.59	-267.952
Coenzyme A biosynthesis bifunctional protein CoaBC	6	25	13	70	87	129	3	15	176.783	305.116	211.197	21.8823	419.403	436.484	634.977	26.55	0.0141311	2205.84	231.032	496.955	-265.923
ATP-dependent Clp protease proteolytic subunit	17	47	33	112	161	188	5	30	500.884	573.618	536.115	36.4705	671.044	807.746	925.393	53.1	0.0128996	4051.27	536.872	801.394	-264.522
Energy-dependent translational throttle protein EttA	12	35	17	102	89	161	4	25	353.565	427.163	276.18	29.1764	611.13	446.518	792.491	44.25	0.0361611	2936.22	352.303	616.713	-264.41
UDP-2%2C3-diacylglucosamine hydrolase	4	20	4	61	44	128	3	22	117.855	244.093	64.9836	21.8823	365.48	220.751	630.055	38.94	0.0575788	1665.1	142.311	405.428	-263.118
ATP-dependent RecD-like DNA helicase	10	46	32	90	167	160	3	25	294.638	561.414	519.869	21.8823	539.232	837.849	787.568	44.25	0.0507071	3562.45	458.64	721.55	-262.91
Tryptophan synthase beta chain	6	25	22	78	94	139	2	23	176.783	305.116	357.41	14.5882	467.335	471.603	684.2	40.71	0.0216134	2477.03	279.769	541.046	-261.276
Macrolide export ATP-binding/permease protein MacB	15	28	32	119	122	153	8	32	441.956	341.73	519.869	58.3528	712.985	612.081	753.112	56.64	0.00888643	3440.09	434.518	692.726	-258.208
Beta-porphyranase B		7		17	25	128		5	0	85.4325	0	0	101.855	125.426	630.055	8.85	0.107299	942.769	28.4775	285.779	-257.301
GTP pyrophosphokinase	7	32	27	78	111	158	5	18	206.246	390.549	438.639	36.4705	467.335	556.893	777.724	31.86	0.0464728	2873.86	345.145	600.651	-255.506
Imidazole glycerol phosphate synthase subunit HisF	5	17	15	70	67	118	1	14	147.319	207.479	243.688	7.29411	419.403	336.143	580.832	24.78	0.0166245	1942.16	199.495	445.459	-245.964
Multifunctional alkaline phosphatase superfamily protein		27	4	57	31	129		9	0	329.525	64.9836	0	341.514	155.529	634.977	15.93	0.113222	1526.53	131.503	377.34	-245.837
Oxygen regulatory protein NreC	4	15	1	47	31	125	1	17	117.855	183.07	16.2459	7.29411	281.599	155.529	615.288	30.09	0.0836854	1376.88	105.724	350.805	-245.082
Ribosomal RNA large subunit methyltransferase I	7	17	16	59	72	141	2	14	206.246	207.479	259.934	14.5882	353.497	361.228	694.045	24.78	0.0486439	2097.02	224.553	469.59	-245.037
Pyrophosphate--fructose 6-phosphate 1-phosphotransferase	2	29	17	92	92	83	1	25	58.9275	353.935	276.18	7.29411	551.215	461.569	408.551	44.25	0.0333503	2117.67	229.681	473.778	-244.098
Nuclease	2	22	3	51	56	106	2	12	58.9275	268.502	48.7377	14.5882	305.565	280.955	521.764	21.24	0.0401775	1499.04	125.389	369.428	-244.039
Rubredoxin		9	3	54	36	78		13	0	109.842	48.7377	0	323.539	180.614	383.94	23.01	0.0117051	1046.67	52.8598	296.031	-243.171
Putative TrmH family tRNA/rRNA methyltransferase	10	35	32	106	131	137	2	21	294.638	427.163	519.869	14.5882	635.096	657.235	674.355	37.17	0.0109523	3222.94	413.89	655.562	-241.672
Ditrans%2Cpolycis-undecaprenyl-diphosphate synthase ((2E%2C6E)-farnesyl-diphosphate specific)	5	17	9	53	80	103	4	15	147.319	207.479	146.213	29.1764	317.548	401.365	506.997	26.55	0.00721411	1756.1	167.004	408.637	-241.633
Ribonuclease BN	4	11	9	63	62	87	1	14	117.855	134.251	146.213	7.29411	377.462	311.058	428.24	24.78	0.00118211	1522.37	132.773	372.253	-239.48
Beta-glucosidase BoGH3B	2	32	1	58	58	110		12	58.9275	390.549	16.2459	0	347.505	290.989	541.453	21.24	0.0827368	1645.67	155.241	393.316	-238.075
putative ABC transporter ATP-binding protein YknY	10	31	30	113	97	144	6	28	294.638	378.344	487.377	43.7646	677.036	486.655	708.811	49.56	0.0280045	3076.63	386.786	624.167	-237.381
Murein DD-endopeptidase MepM	42	73	66	195	227	326	12	47	1237.48	890.939	1072.23	87.5293	1168.34	1138.87	1604.67	83.19	0.130001	7200.05	1066.88	1303.96	-237.077
Polyphosphate kinase	4	20	5	64	59	96	2	15	117.855	244.093	81.2295	14.5882	383.454	296.006	472.541	26.55	0.0145357	1609.77	147.726	384	-236.275
Sensory transduction protein LytR		9	3	47	39	79		11	0	109.842	48.7377	0	281.599	195.665	388.862	19.47	0.0107076	1024.71	52.8598	288.709	-235.849
Sensor histidine kinase BtsS	4	17	18	99	25	123		12	117.855	207.479	292.426	0	593.155	125.426	605.443	21.24	0.114375	1941.79	205.92	441.342	-235.422
Chorismate synthase	6	23	26	75	95	134	5	19	176.783	280.707	422.393	36.4705	449.36	476.621	659.588	33.63	0.0362551	2501.92	293.294	528.523	-235.229
Transcriptional regulatory protein YpdB	3	10	7	75	30	87	1	7	88.3913	122.046	113.721	7.29411	449.36	150.512	428.24	12.39	0.0362407	1359.57	108.053	342.704	-234.651
Dihydroorotate dehydrogenase B (NAD(+))%2C catalytic subunit	5	22	20	73	83	120	1	28	147.319	268.502	324.918	7.29411	437.377	416.416	590.676	49.56	0.0182822	2192.5	246.913	481.49	-234.577
Sodium/glucose cotransporter	16	13	13	72	57	168	7	34	471.42	158.66	211.197	51.0587	431.386	285.972	826.947	60.18	0.140679	2436.64	280.426	514.768	-234.342
Sensor histidine kinase TodS	2	43		56	78	113		9	58.9275	524.8	0	0	335.522	391.331	556.22	15.93	0.13105	1866.8	194.576	427.691	-233.115
5-methylthioadenosine/S-adenosylhomocysteine deaminase		13	6	42	40	102		14	0	158.66	97.4754	0	251.642	200.682	502.075	24.78	0.0443746	1210.53	85.3786	318.133	-232.754
Peptide chain release factor 1	7	22	10	55	107	95	6	20	206.246	268.502	162.459	43.7646	329.531	536.825	467.619	35.4	0.0136064	2014.95	212.403	444.658	-232.256
Cytidylate kinase	18	57	46	147	178	182	5	30	530.348	695.665	747.311	36.4705	880.746	893.036	895.859	53.1	0.0120255	4679.44	657.775	889.88	-232.106
Glucokinase	5	24	25	89	79	124	3	16	147.319	292.912	406.147	21.8823	533.241	396.348	610.365	28.32	0.0384735	2408.21	282.126	513.318	-231.192
Aminodeoxyfutalosine synthase		8	2	39	22	97		12	0	97.6372	32.4918	0	233.667	110.375	477.463	21.24	0.0539287	951.635	43.3763	273.835	-230.459
Histidinol-phosphate aminotransferase	2	23	19	78	61	115	3	18	58.9275	280.707	308.672	21.8823	467.335	306.041	566.065	31.86	0.051568	2009.63	216.102	446.48	-230.378
Threonine synthase	7	22	21	80	84	123	4	31	206.246	268.502	341.164	29.1764	479.317	421.433	605.443	54.87	0.0131327	2351.28	271.971	502.064	-230.094
DNA polymerase III subunit gamma/tau	1	29	6	52	77	96	1	16	29.4638	353.935	97.4754	7.29411	311.556	386.313	472.541	28.32	0.0515387	1658.58	160.291	390.137	-229.846
Protein YhgF				44	33	52	3	14	0	0	0	21.8823	263.625	165.563	255.96	24.78	0.000959186	707.03	0	228.382	-228.382
4-hydroxy-3-methylbut-2-en-1-yl diphosphate synthase (ferredoxin)	1	15	2	39	43	97		11	29.4638	183.07	32.4918	0	233.667	215.733	477.463	19.47	0.0411026	1171.89	81.6751	308.955	-227.28
D-aminoacyl-tRNA deacylase	17	53	29	112	146	182	8	34	500.884	646.846	471.131	58.3528	671.044	732.49	895.859	60.18	0.0291414	3976.61	539.62	766.465	-226.844
ATP phosphoribosyltransferase	3	18	14	69	56	105	2	16	88.3913	219.684	227.443	14.5882	413.411	280.955	516.842	28.32	0.0256197	1761.31	178.506	403.736	-225.23
Competence protein ComM	9	25	24	81	88	144	2	24	265.174	305.116	389.902	14.5882	485.309	441.501	708.811	42.48	0.0338973	2610.4	320.064	545.207	-225.143
Retaining alpha-galactosidase		16		43	14	110		22	0	195.274	0	0	257.633	70.2388	541.453	38.94	0.106291	1064.6	65.0915	289.775	-224.684
Rubrerythrin	4	20	19	68	85	103	1	16	117.855	244.093	308.672	7.29411	407.42	426.45	506.997	28.32	0.0124318	2018.78	223.54	446.956	-223.416
dTDP-4-dehydrorhamnose 3%2C5-epimerase	5	24	17	72	55	138	2	22	147.319	292.912	276.18	14.5882	431.386	275.938	679.278	38.94	0.0756229	2117.6	238.804	462.2	-223.397
UDP-N-acetylglucosamine--N-acetylmuramyl-(pentapeptide) pyrophosphoryl-undecaprenol N-acetylglucosamine transferase	12	33	30	99	111	154	5	24	353.565	402.753	487.377	36.4705	593.155	556.893	758.034	42.48	0.0194758	3188.25	414.565	636.028	-221.463
L-rhamnose-proton symporter		8		26	36	86		2	0	97.6372	0	0	155.778	180.614	423.318	3.54	0.0365308	857.347	32.5457	253.237	-220.691
Beta-glucuronidase		6		27	26	90		5	0	73.2279	0	0	161.77	130.444	443.007	8.85	0.0486439	808.448	24.4093	245.073	-220.664
ATP-dependent helicase/deoxyribonuclease subunit B	4	22	19	68	79	112	2	12	117.855	268.502	308.672	14.5882	407.42	396.348	551.298	21.24	0.0226637	2064.68	231.676	451.688	-220.012
Homoserine O-acetyltransferase	1	14	4	49	32	94		16	29.4638	170.865	64.9836	0	293.582	160.546	462.696	28.32	0.0445935	1182.14	88.4375	305.608	-217.171
Orotate phosphoribosyltransferase	8	29	19	87	90	117	5	24	235.71	353.935	308.672	36.4705	521.258	451.535	575.909	42.48	0.00606865	2483.49	299.439	516.234	-216.795
ATP-dependent 6-phosphofructokinase	6	15	13	64	54	115	4	24	176.783	183.07	211.197	29.1764	383.454	270.921	566.065	42.48	0.0334455	1820.67	190.35	406.813	-216.464
tRNA N6-adenosine threonylcarbamoyltransferase	9	29	34	96	105	146	8	21	265.174	353.935	552.361	58.3528	575.181	526.791	718.656	37.17	0.0512965	3050.45	390.49	606.876	-216.386
Iron hydrogenase 1	3	18	8	62	65	78		9	88.3913	219.684	129.967	0	371.471	326.109	383.94	15.93	0.00363541	1519.56	146.014	360.506	-214.492
2-iminoacetate synthase	5	25	7	45	68	121	1	15	147.319	305.116	113.721	7.29411	269.616	341.16	595.598	26.55	0.0687669	1779.82	188.719	402.125	-213.406
Mannan endo-1%2C4-beta-mannosidase		18		31	96	38		5	0	219.684	0	0	185.736	481.638	187.047	8.85	0.0798278	1074.1	73.2279	284.807	-211.579
Uracil phosphoribosyltransferase	10	20	12	68	78	115	4	12	294.638	244.093	194.951	29.1764	407.42	391.331	566.065	21.24	0.0142464	2127.67	244.56	454.938	-210.378
Trigger factor	9	22	28	95	108	103	5	20	265.174	268.502	454.885	36.4705	569.189	541.842	506.997	35.4	0.0161854	2643.06	329.52	539.343	-209.823
Ribosomal protein S12 methylthiotransferase RimO	14	42	33	90	150	162	6	20	412.493	512.595	536.115	43.7646	539.232	752.559	797.413	35.4	0.0382711	3594.17	487.067	696.401	-209.334
Cysteine desulfuration protein SufE		12	1	31	45	77	1	12	0	146.456	16.2459	7.29411	185.736	225.768	379.017	21.24	0.0246011	960.516	54.2339	263.507	-209.273
Uridine phosphorylase	7	11	6	60	59	83	3	16	206.246	134.251	97.4754	21.8823	359.488	296.006	408.551	28.32	0.00511487	1523.9	145.991	354.682	-208.691
UDP-N-acetylmuramoyl-tripeptide--D-alanyl-D-alanine ligase	10	23	22	76	97	125	4	19	294.638	280.707	357.41	29.1764	455.352	486.655	615.288	33.63	0.00929274	2519.22	310.918	519.098	-208.18
Ribosomal protein L11 methyltransferase	9	24	20	74	81	133	9	23	265.174	292.912	324.918	65.647	443.369	406.382	654.666	40.71	0.0295842	2453.07	294.334	501.472	-207.138
4-alpha-glucanotransferase	8	24	15	77	64	124	4	22	235.71	292.912	243.688	29.1764	461.343	321.092	610.365	38.94	0.0363211	2194.29	257.437	464.267	-206.83
Cysteine desulfurase	1	9	4	30	45	85		8	29.4638	109.842	64.9836	0	179.744	225.768	418.396	14.16	0.0272567	1028.2	68.0964	274.636	-206.539
GTPase Era	9	28	21	65	112	125	6	21	265.174	341.73	341.164	43.7646	389.445	561.91	615.288	37.17	0.0235591	2558.48	316.023	522.215	-206.192
Crossover junction endodeoxyribonuclease RuvC	10	24	18	59	110	120	4	22	294.638	292.912	292.426	29.1764	353.497	551.876	590.676	38.94	0.0245133	2405.2	293.325	498.683	-205.358
Dipeptidyl carboxypeptidase		11	2	35	12	104		13	0	134.251	32.4918	0	209.701	60.2047	511.919	23.01	0.106952	948.568	55.581	260.608	-205.028
Phospho-2-dehydro-3-deoxyheptonate aldolase	2	20	25	70	86	95		12	58.9275	244.093	406.147	0	419.403	431.467	467.619	21.24	0.0577907	2027.66	236.389	439.496	-203.107
Galactose/methyl galactoside import ATP-binding protein MglA	10	8	9	97	54	60	5	9	294.638	97.6372	146.213	36.4705	581.172	270.921	295.338	15.93	0.0773735	1722.39	179.496	382.477	-202.981
Ribosomal RNA large subunit methyltransferase H	8	21	19	66	87	117	2	26	235.71	256.298	308.672	14.5882	395.437	436.484	575.909	46.02	0.0131078	2223.1	266.893	469.277	-202.383
Inner membrane protein YrbG	9	20	18	74	96	96	7	23	265.174	244.093	292.426	51.0587	443.369	481.638	472.541	40.71	0.000197512	2250.3	267.231	465.849	-198.618
Endonuclease MutS2	9	37	25	72	131	128	3	14	265.174	451.572	406.147	21.8823	431.386	657.235	630.055	24.78	0.046799	2863.45	374.298	572.892	-198.594
Thermostable beta-glucosidase B	1	10	10	35	27	114	1	6	29.4638	122.046	162.459	7.29411	209.701	135.461	561.142	10.62	0.111563	1227.57	104.656	302.101	-197.445
Putative KHG/KDPG aldolase				49	36	24	5	11	0	0	0	36.4705	293.582	180.614	118.135	19.47	0.00918492	628.802	0	197.444	-197.444
Thiamine-monophosphate kinase	5	20	15	65	49	120	4	18	147.319	244.093	243.688	29.1764	389.445	245.836	590.676	31.86	0.0670557	1890.23	211.7	408.652	-196.952
Glycogen synthase	13	40	31	80	134	165	5	23	383.029	488.186	503.623	36.4705	479.317	672.286	812.18	40.71	0.065594	3375.09	458.279	654.594	-196.315
Primosomal protein N'	12	31	26	80	103	151	8	21	353.565	378.344	422.393	58.3528	479.317	516.757	743.268	37.17	0.0415777	2952	384.768	579.781	-195.013
Multidrug resistance protein NorM	9	24	4	72	88	68	3	13	265.174	292.912	64.9836	21.8823	431.386	441.501	334.717	23.01	0.0351414	1852.55	207.69	402.534	-194.845
Chaperone SurA	4	22	15	58	59	116	4	23	117.855	268.502	243.688	29.1764	347.505	296.006	570.987	40.71	0.0567207	1873.72	210.015	404.833	-194.818
Macrolide export protein MacA	6	6	5	56	31	86	3	24	176.783	73.2279	81.2295	21.8823	335.522	155.529	423.318	42.48	0.042764	1267.49	110.413	304.79	-194.376
Electron transport complex subunit RsxD	13	20	20	74	93	127	6	19	383.029	244.093	324.918	43.7646	443.369	466.586	625.132	33.63	0.0248907	2530.89	317.347	511.696	-194.349
NADPH-flavin oxidoreductase	4	15	2	45	57	73		12	117.855	183.07	32.4918	0	269.616	285.972	359.328	21.24	0.00991253	1248.33	111.139	304.972	-193.833
Cyclic dehypoxanthine futalosine synthase		7	2	30	16	89	2	16	0	85.4325	32.4918	14.5882	179.744	80.2729	438.085	28.32	0.0760601	830.614	39.3081	232.701	-193.392
Release factor glutamine methyltransferase	12	27	22	73	111	127	7	18	353.565	329.525	357.41	51.0587	437.377	556.893	625.132	31.86	0.0127548	2710.96	346.833	539.801	-192.968
Multidrug resistance protein MdtE		19	1	34	28	98		15	0	231.888	16.2459	0	203.71	140.478	482.386	26.55	0.10452	1074.71	82.7114	275.524	-192.813
putative tRNA-dihydrouridine synthase	11	32	26	98	107	120	7	21	324.101	390.549	422.393	51.0587	587.164	536.825	590.676	37.17	0.00234055	2902.77	379.014	571.555	-192.541
putative glycosyltransferase EpsJ	4	46	60	120	137	167		21	117.855	561.414	974.754	0	718.976	687.337	822.024	37.17	0.243855	3882.36	551.341	742.779	-191.438
C4-dicarboxylic acid transporter DauA		14	4	39	53	63		15	0	170.865	64.9836	0	233.667	265.904	310.105	26.55	0.0123398	1045.52	78.6162	269.892	-191.276
Purine nucleoside phosphorylase 1	1	15	13	44	56	92	5	16	29.4638	183.07	211.197	36.4705	263.625	280.955	452.852	28.32	0.0408927	1457.63	141.243	332.477	-191.234
Pesticin receptor		7	1	26	26	79	1	9	0	85.4325	16.2459	7.29411	155.778	130.444	388.862	15.93	0.0455874	784.056	33.8928	225.028	-191.135
1-acyl-sn-glycerol-3-phosphate acyltransferase	11	30	12	79	87	111	3	15	324.101	366.139	194.951	21.8823	473.326	436.484	546.375	26.55	0.0175781	2363.26	295.064	485.395	-190.331
L-methionine gamma-lyase	6	26	30	75	94	127	2	19	176.783	317.321	487.377	14.5882	449.36	471.603	625.132	33.63	0.0744055	2542.16	327.16	515.365	-188.205
putative NTE family protein	4	13	6	33	77	72	2	12	117.855	158.66	97.4754	14.5882	197.718	386.313	354.406	21.24	0.0183798	1327.02	124.664	312.813	-188.149
Shikimate kinase	5	22	11	61	61	99		15	147.319	268.502	178.705	0	365.48	306.041	487.308	26.55	0.021737	1753.35	198.175	386.276	-188.101
Ribonuclease HII	13	23	17	69	97	122	6	16	383.029	280.707	276.18	43.7646	413.411	486.655	600.521	28.32	0.0222695	2484.27	313.305	500.196	-186.89
Cob(I)yrinic acid a%2Cc-diamide adenosyltransferase	5	14	10	53	46	100	3	21	147.319	170.865	162.459	21.8823	317.548	230.785	492.23	37.17	0.0364633	1543.09	160.214	346.854	-186.64
UDP-N-acetylmuramate--L-alanine ligase	13	30	22	81	102	136	5	24	383.029	366.139	357.41	36.4705	485.309	511.74	669.433	42.48	0.0161462	2809.53	368.859	555.494	-186.635
Exodeoxyribonuclease 7 small subunit	6	25	24	79	82	111	5	16	176.783	305.116	389.902	36.4705	473.326	411.399	546.375	28.32	0.0317655	2339.37	290.6	477.033	-186.433
Exodeoxyribonuclease 7 large subunit	8	26	29	82	94	126	4	19	235.71	317.321	471.131	29.1764	491.3	471.603	620.21	33.63	0.0444426	2636.45	341.387	527.705	-186.317
Exo-glucosaminidase LytG		12	5	27	40	86		9	0	146.456	81.2295	0	161.77	200.682	423.318	15.93	0.0563763	1013.46	75.8951	261.923	-186.028
Beta-porphyranase A		9	2	14	30	94		2	0	109.842	32.4918	0	83.8806	150.512	462.696	3.54	0.100919	839.422	47.4445	232.363	-184.918
Transcriptional regulatory protein ZraR	7	11	5	43	65	79	4	13	206.246	134.251	81.2295	29.1764	257.633	326.109	388.862	23.01	0.0124187	1423.51	140.576	324.201	-183.626
Glutamine--tRNA ligase	6	15	19	63	72	97	3	17	176.783	183.07	308.672	21.8823	377.462	361.228	477.463	30.09	0.0157724	1906.56	222.841	405.385	-182.543
3'(2')%2C5'-bisphosphate nucleotidase CysQ	5	11	17	63	36	111	3	17	147.319	134.251	276.18	21.8823	377.462	180.614	546.375	30.09	0.0940872	1684.08	185.917	368.151	-182.234
Imidazole glycerol phosphate synthase subunit HisH	4	18	16	71	36	109	1	12	117.855	219.684	259.934	7.29411	425.394	180.614	536.531	21.24	0.0920542	1747.31	199.158	380.846	-181.689
tRNA-specific adenosine deaminase	18	44	42	116	149	173	8	36	530.348	537.004	682.328	58.3528	695.01	747.542	851.558	63.72	0.0275263	4102.14	583.227	764.703	-181.477
Amidophosphoribosyltransferase	11	36	25	91	117	118	5	26	324.101	439.367	406.147	36.4705	545.224	586.996	580.832	46.02	0.00389959	2919.14	389.872	571.017	-181.145
tRNA pseudouridine synthase B	11	26	21	79	91	121	8	21	324.101	317.321	341.164	58.3528	473.326	456.552	595.598	37.17	0.00757087	2566.42	327.529	508.492	-180.964
Beta-xylosidase		12	1	45	28	60		20	0	146.456	16.2459	0	269.616	140.478	295.338	35.4	0.0266622	868.133	54.2339	235.144	-180.91
Cytidine deaminase	7	24	15	58	72	117	3	20	206.246	292.912	243.688	21.8823	347.505	361.228	575.909	35.4	0.040902	2049.37	247.615	428.214	-180.599
Propionyl-CoA carboxylase beta chain		14	3	25	64	59		11	0	170.865	48.7377	0	149.787	321.092	290.416	19.47	0.0346425	980.897	73.2009	253.765	-180.564
4-diphosphocytidyl-2-C-methyl-D-erythritol kinase	8	23	21	73	72	122	5	14	235.71	280.707	341.164	36.4705	437.377	361.228	600.521	24.78	0.0393839	2293.18	285.86	466.375	-180.515
HTH-type transcriptional activator Btr	3	19	6	73	52	53	1	8	88.3913	231.888	97.4754	7.29411	437.377	260.887	260.882	14.16	0.03683	1384.2	139.252	319.715	-180.464
Deoxyribose-phosphate aldolase	10	19	10	66	69	99	6	17	294.638	231.888	162.459	43.7646	395.437	346.177	487.308	30.09	0.016483	1961.67	229.662	409.641	-179.979
3-deoxy-D-manno-octulosonate 8-phosphate phosphatase KdsC	2	21	13	53	46	105	2	21	58.9275	256.298	211.197	14.5882	317.548	230.785	516.842	37.17	0.0790462	1606.18	175.474	355.058	-179.584
H(+)/Cl(-) exchange transporter ClcA	2	15	3	49	45	63	1	12	58.9275	183.07	48.7377	7.29411	293.582	225.768	310.105	21.24	0.0116887	1127.48	96.9116	276.485	-179.573
Pyridoxine 5'-phosphate synthase	5	21	6	52	47	99	2	12	147.319	256.298	97.4754	14.5882	311.556	235.802	487.308	21.24	0.0567124	1550.35	167.031	344.889	-177.858
Putative esterase	3	11	6	39	42	83	1	11	88.3913	134.251	97.4754	7.29411	233.667	210.716	408.551	19.47	0.0250635	1180.35	106.706	284.312	-177.606
Ribonuclease P protein component	8	22	20	64	90	107	5	21	235.71	268.502	324.918	36.4705	383.454	451.535	526.686	37.17	0.011067	2227.28	276.377	453.892	-177.515
Regulatory protein AsnC	2	22	2	36	65	71	1	10	58.9275	268.502	32.4918	7.29411	215.693	326.109	349.483	17.7	0.05322	1258.5	119.974	297.095	-177.121
ATP-dependent 6-phosphofructokinase 1	1	8	3	30	34	72	1	11	29.4638	97.6372	48.7377	7.29411	179.744	170.58	354.406	19.47	0.0246178	887.862	58.6129	234.91	-176.297
1%2C4-dihydroxy-6-naphtoate synthase		13	1	34	14	87		14	0	158.66	16.2459	0	203.71	70.2388	428.24	24.78	0.102115	877.095	58.3021	234.063	-175.761
Inner spore coat protein H	1	1		34	5	69		6	29.4638	12.2046	0	0	203.71	25.0853	339.639	10.62	0.0636818	610.102	13.8895	189.478	-175.589
1-(5-phosphoribosyl)-5-[(5-phosphoribosylamino)methylideneamino] imidazole-4-carboxamide isomerase	2	14	16	50	32	113	1	14	58.9275	170.865	259.934	7.29411	299.573	160.546	556.22	24.78	0.123618	1513.36	163.242	338.78	-175.537
Ribosomal RNA small subunit methyltransferase E	11	32	12	68	94	113	8	15	324.101	390.549	194.951	58.3528	407.42	471.603	556.22	26.55	0.0355825	2403.2	303.2	478.414	-175.214
Protease 4	4	14	5	41	42	89	1	7	117.855	170.865	81.2295	7.29411	245.65	210.716	438.085	12.39	0.0405234	1271.7	123.317	298.15	-174.834
Anaerobic sulfatase-maturating enzyme	8	28	12	76	73	96	1	15	235.71	341.73	194.951	7.29411	455.352	366.245	472.541	26.55	0.0168345	2073.82	257.464	431.379	-173.916
Cytochrome c biogenesis protein CcsA		6	5	32	19	79		11	0	73.2279	81.2295	0	191.727	95.3241	388.862	19.47	0.0630729	830.37	51.4858	225.304	-173.819
3-dehydroquinate synthase	7	25	21	74	89	98	5	17	206.246	305.116	341.164	36.4705	443.369	446.518	482.386	30.09	0.00740957	2261.27	284.175	457.424	-173.249
Dihydropteroate synthase	5	17	10	49	49	101	5	18	147.319	207.479	162.459	36.4705	293.582	245.836	497.152	31.86	0.0469963	1590.3	172.419	345.523	-173.104
FeS cluster assembly protein SufD	2	17	4	31	50	84	3	11	58.9275	207.479	64.9836	21.8823	185.736	250.853	413.473	19.47	0.0533109	1203.33	110.463	283.354	-172.891
Ribosomal RNA small subunit methyltransferase H	16	36	33	95	128	153	5	28	471.42	439.367	536.115	36.4705	569.189	642.183	753.112	49.56	0.0232337	3447.86	482.301	654.828	-172.528
Adenosine deaminase		9	5	43	14	77		8	0	109.842	81.2295	0	257.633	70.2388	379.017	14.16	0.073323	897.96	63.6904	235.63	-171.939
Acetylglutamate kinase	5	27	16	60	65	115	3	14	147.319	329.525	259.934	21.8823	359.488	326.109	566.065	24.78	0.0676409	2010.32	245.593	417.221	-171.628
Trk system potassium uptake protein TrkA	8	21	16	71	79	90	6	16	235.71	256.298	259.934	43.7646	425.394	396.348	443.007	28.32	0.000194808	2060.46	250.647	421.583	-170.936
3-methyl-2-oxobutanoate hydroxymethyltransferase	3	13	6	33	49	84	2	12	88.3913	158.66	97.4754	14.5882	197.718	245.836	413.473	21.24	0.0342756	1216.14	114.842	285.676	-170.834
Dihydrofolate reductase	4	18	11	48	71	78		17	117.855	219.684	178.705	0	287.59	356.211	383.94	30.09	0.00718135	1543.98	172.081	342.58	-170.499
Hercynine oxygenase		10	2	41	12	73	2	29	0	122.046	32.4918	14.5882	245.65	60.2047	359.328	51.33	0.0730225	834.309	51.5128	221.728	-170.215
Fe-S protein maturation auxiliary factor SufT		12	1	34	15	80		12	0	146.456	16.2459	0	203.71	75.2559	393.784	21.24	0.0878702	835.452	54.2339	224.25	-170.016
N-acetylornithine carbamoyltransferase		10	2	24	27	78		9	0	122.046	32.4918	0	143.795	135.461	383.94	15.93	0.0651741	817.734	51.5128	221.065	-169.552
DNA repair protein RecN	10	30	19	75	95	112	3	12	294.638	366.139	308.672	21.8823	449.36	476.621	551.298	21.24	0.00535734	2468.61	323.15	492.426	-169.276
Redox-sensing transcriptional repressor Rex	3	23	14	53	67	91		14	88.3913	280.707	227.443	0	317.548	336.143	447.929	24.78	0.037408	1698.16	198.847	367.207	-168.36
Histidinol dehydrogenase	2	22	21	66	54	103	3	15	58.9275	268.502	341.164	21.8823	395.437	270.921	506.997	26.55	0.0982236	1863.83	222.865	391.118	-168.254
Dihydroxy-acid dehydratase	6	21	21	75	58	109	4	16	176.783	256.298	341.164	29.1764	449.36	290.989	536.531	28.32	0.0618067	2080.3	258.081	425.627	-167.545
Ribosomal RNA small subunit methyltransferase F	5	20	9	51	60	88	1	12	147.319	244.093	146.213	7.29411	305.565	301.023	433.163	21.24	0.0182335	1584.67	179.208	346.584	-167.375
KHG/KDPG aldolase				25	29	42	1	10	0	0	0	7.29411	149.787	145.495	206.737	17.7	0.000530471	509.312	0	167.339	-167.339
3'%2C5'-cyclic adenosine monophosphate phosphodiesterase CpdA	10	27	24	57	133	103	7	22	294.638	329.525	389.902	51.0587	341.514	667.269	506.997	38.94	0.0816724	2580.9	338.022	505.26	-167.238
4-hydroxy-tetrahydrodipicolinate synthase	10	23	25	80	96	106	4	20	294.638	280.707	406.147	29.1764	479.317	481.638	521.764	35.4	0.0082268	2493.39	327.164	494.24	-167.076
putative response regulatory protein	1	11	16	88	34	46		7	29.4638	134.251	259.934	0	527.249	170.58	226.426	12.39	0.13313	1347.9	141.216	308.085	-166.869
Dihydroorotate dehydrogenase B (NAD(+))%2C electron transfer subunit	2	22	13	57	27	114		17	58.9275	268.502	211.197	0	341.514	135.461	561.142	30.09	0.146898	1576.74	179.542	346.039	-166.497
Electron transport complex subunit RsxB	14	36	46	119	129	150	7	26	412.493	439.367	747.311	51.0587	712.985	647.2	738.345	46.02	0.103701	3748.76	533.057	699.51	-166.453
Transcriptional regulatory protein SrrA	6	37	30	122	80	98	1	22	176.783	451.572	487.377	7.29411	730.959	401.365	482.386	38.94	0.149508	2737.73	371.91	538.236	-166.326
Chromate transport protein	5	27	16	65	90	80	2	5	147.319	329.525	259.934	14.5882	389.445	451.535	393.784	8.85	0.0214936	1986.13	245.593	411.588	-165.995
UDP-N-acetylmuramoyl-L-alanyl-D-glutamate--2%2C6-diaminopimelate ligase	13	28	33	83	111	143	5	19	383.029	341.73	536.115	36.4705	497.292	556.893	703.889	33.63	0.0618722	3055.42	420.291	586.025	-165.734
Glutamate--tRNA ligase	12	24	24	72	97	125	4	26	353.565	292.912	389.902	29.1764	431.386	486.655	615.288	46.02	0.0270887	2598.88	345.459	511.109	-165.65
NAD kinase	9	19	20	65	76	111	4	14	265.174	231.888	324.918	29.1764	389.445	381.296	546.375	24.78	0.0259339	2168.27	273.993	439.039	-165.046
Gamma-glutamyl phosphate reductase	4	16	23	63	61	101	7	22	117.855	195.274	373.656	51.0587	377.462	306.041	497.152	38.94	0.077464	1918.5	228.928	393.552	-164.623
Histidine biosynthesis bifunctional protein HisB	2	11	17	50	36	98		16	58.9275	134.251	276.18	0	299.573	180.614	482.386	28.32	0.102037	1431.93	156.453	320.858	-164.405
Futalosine hydrolase		11	2	29	15	83		11	0	134.251	32.4918	0	173.753	75.2559	408.551	19.47	0.100173	824.302	55.581	219.186	-163.606
Succinyl-diaminopimelate desuccinylase	5	13	10	44	68	72	3	15	147.319	158.66	162.459	21.8823	263.625	341.16	354.406	26.55	0.0023338	1449.51	156.146	319.73	-163.584
Magnesium transport protein CorA	1	11	3	29	29	78		13	29.4638	134.251	48.7377	0	173.753	145.495	383.94	23.01	0.0581064	915.639	70.8175	234.396	-163.578
Electron transport complex subunit RnfE	7	15	14	44	74	96	2	16	206.246	183.07	227.443	14.5882	263.625	371.262	472.541	28.32	0.0284205	1738.77	205.586	369.143	-163.556
ATP-dependent Clp protease ATP-binding subunit ClpC	4	8	10	38	61	68	1	8	117.855	97.6372	162.459	7.29411	227.676	306.041	334.717	14.16	0.00591367	1253.68	125.984	289.478	-163.494
Uracil-DNA glycosylase	7	28	13	55	84	101	3	18	206.246	341.73	211.197	21.8823	329.531	421.433	497.152	31.86	0.03408	2029.17	253.058	416.039	-162.981
Deoxyadenosine/deoxycytidine kinase	1	8	1	26	27	69	1	11	29.4638	97.6372	16.2459	7.29411	155.778	135.461	339.639	19.47	0.0400031	781.518	47.7823	210.293	-162.51
Exoenzyme S synthesis regulatory protein ExsA	1	3	3	18	21	79	1	3	29.4638	36.6139	48.7377	7.29411	107.846	105.358	388.862	5.31	0.079982	724.176	38.2718	200.689	-162.417
Zinc transporter ZupT		19	13	64	49	61		14	0	231.888	211.197	0	383.454	245.836	300.26	24.78	0.0632171	1372.64	147.695	309.85	-162.155
putative ABC transporter ATP-binding protein YlmA	2	9	4	35	20	83		9	58.9275	109.842	64.9836	0	209.701	100.341	408.551	15.93	0.0762761	952.347	77.9176	239.531	-161.614
CTP synthase	14	22	16	66	91	116	5	21	412.493	268.502	259.934	36.4705	395.437	456.552	570.987	37.17	0.0437802	2400.38	313.643	474.325	-160.682
Uroporphyrinogen decarboxylase	6	8	8	50	45	73	2	8	176.783	97.6372	129.967	14.5882	299.573	225.768	359.328	14.16	0.01177	1303.64	134.796	294.89	-160.094
Nucleoside triphosphate pyrophosphohydrolase	6	13	14	54	57	88	5	15	176.783	158.66	227.443	36.4705	323.539	285.972	433.163	26.55	0.0152094	1642.03	187.629	347.558	-159.93
DNA mismatch repair protein MutS	12	39	30	93	118	131	6	35	353.565	475.981	487.377	43.7646	557.207	592.013	644.821	61.95	0.016584	3154.73	438.974	598.014	-159.039
Putative two-component membrane permease complex subunit SMU_747c	4	12	10	45	37	91	3	15	117.855	146.456	162.459	21.8823	269.616	185.631	447.929	26.55	0.0564361	1351.83	142.257	301.059	-158.802
Unsaturated chondroitin disaccharide hydrolase		8	1	35	14	63		10	0	97.6372	16.2459	0	209.701	70.2388	310.105	17.7	0.0522221	703.928	37.961	196.682	-158.721
Indole-3-glycerol phosphate synthase	3	10	13	45	30	97		17	88.3913	122.046	211.197	0	269.616	150.512	477.463	30.09	0.0979719	1319.23	140.545	299.197	-158.652
Transcription-repair-coupling factor	13	30	23	78	95	133	5	26	383.029	366.139	373.656	36.4705	467.335	476.621	654.666	46.02	0.0302277	2757.92	374.275	532.874	-158.599
putative ABC transporter ATP-binding protein YheS	9	25	25	60	103	117	8	22	265.174	305.116	406.147	58.3528	359.488	516.757	575.909	38.94	0.0542792	2486.94	325.479	484.051	-158.572
Methylglyoxal synthase	5	20	14	63	66	78		13	147.319	244.093	227.443	0	377.462	331.126	383.94	23.01	0.00494754	1711.38	206.285	364.176	-157.891
HTH-type transcriptional activator RhaR	5	20	6	57	57	68	1	14	147.319	244.093	97.4754	7.29411	341.514	285.972	334.717	24.78	0.0136906	1458.38	162.962	320.734	-157.772
Phosphomannomutase/phosphoglucomutase	4	14	5	34	45	84	1	14	117.855	170.865	81.2295	7.29411	203.71	225.768	413.473	24.78	0.045992	1220.19	123.317	280.984	-157.667
P-protein	5	20	22	68	68	96	3	20	147.319	244.093	357.41	21.8823	407.42	341.16	472.541	35.4	0.0463633	1991.82	249.607	407.04	-157.433
Alcohol dehydrogenase YqhD	2	14	2	34	38	69	2	11	58.9275	170.865	32.4918	14.5882	203.71	190.648	339.639	19.47	0.0346471	1010.87	87.4281	244.666	-157.238
Evolved beta-galactosidase subunit alpha	2	10	8	34	28	89	1	13	58.9275	122.046	129.967	7.29411	203.71	140.478	438.085	23.01	0.0836908	1100.51	103.647	260.757	-157.11
Hydroxypyruvate reductase	3	20	16	54	65	84		18	88.3913	244.093	259.934	0	323.539	326.109	413.473	31.86	0.0325964	1655.54	197.473	354.374	-156.901
FeS cluster assembly protein SufB	2	13	2	23	54	63	2	7	58.9275	158.66	32.4918	14.5882	137.804	270.921	310.105	12.39	0.0366792	983.498	83.3599	239.61	-156.25
D-xylose-proton symporter	2	11		27	31	70		8	58.9275	134.251	0	0	161.77	155.529	344.561	14.16	0.0498069	855.038	64.3929	220.62	-156.227
Glucose-1-phosphate thymidylyltransferase 2		9	4	33	29	61		9	0	109.842	64.9836	0	197.718	145.495	300.26	15.93	0.0240745	818.299	58.2751	214.491	-156.216
tRNA pseudouridine synthase A	10	39	25	91	118	103	6	25	294.638	475.981	406.147	43.7646	545.224	592.013	506.997	44.25	0.0277563	2864.76	392.255	548.078	-155.822
Polyprenol monophosphomannose synthase	3	9	9	41	47	67		6	88.3913	109.842	146.213	0	245.65	235.802	329.794	10.62	0.0052462	1155.69	114.815	270.415	-155.6
3-dehydroquinate dehydratase	7	17	19	70	70	85	5	18	206.246	207.479	308.672	36.4705	419.403	351.194	418.396	31.86	0.00942169	1947.86	240.799	396.331	-155.532
Flavo-diiron protein FprA1	1	11	3	32	47	51	1	5	29.4638	134.251	48.7377	7.29411	191.727	235.802	251.037	8.85	0.00671868	898.313	70.8175	226.189	-155.371
Acetate kinase	15	32	20	86	102	121	9	25	441.956	390.549	324.918	65.647	515.266	511.74	595.598	44.25	0.0117915	2845.67	385.808	540.868	-155.061
UDP-3-O-acylglucosamine N-acyltransferase	1	16	9	37	43	81		12	29.4638	195.274	146.213	0	221.684	215.733	398.706	21.24	0.058174	1207.08	123.65	278.708	-155.058
Butyrate kinase 2		11	5	30	32	69		12	0	134.251	81.2295	0	179.744	160.546	339.639	21.24	0.0439651	895.409	71.8269	226.643	-154.816
L-glyceraldehyde 3-phosphate reductase	2	14	11	49	36	81	1	7	58.9275	170.865	178.705	7.29411	293.582	180.614	398.706	12.39	0.0521435	1288.69	136.166	290.967	-154.802
Teichuronic acid biosynthesis protein TuaB		12		23	40	55		7	0	146.456	0	0	137.804	200.682	270.727	12.39	0.0339696	755.668	48.8186	203.071	-154.252
Bifunctional aspartokinase/homoserine dehydrogenase 1	4	16	5	36	42	87	4	16	117.855	195.274	81.2295	29.1764	215.693	210.716	428.24	28.32	0.0623558	1278.18	131.453	284.883	-153.43
3-phosphoshikimate 1-carboxyvinyltransferase	7	21	29	74	78	113	2	17	206.246	256.298	471.131	14.5882	443.369	391.331	556.22	30.09	0.0914173	2339.18	311.225	463.64	-152.415
Tetraacyldisaccharide 4'-kinase	4	14	7	40	45	80	2	8	117.855	170.865	113.721	14.5882	239.659	225.768	393.784	14.16	0.0277286	1276.24	134.147	286.403	-152.256
3-isopropylmalate dehydrogenase	5	20	15	56	61	91	7	18	147.319	244.093	243.688	51.0587	335.522	306.041	447.929	31.86	0.0241534	1775.65	211.7	363.164	-151.464
Phosphoserine aminotransferase	7	22	11	62	77	71	4	16	206.246	268.502	178.705	29.1764	371.471	386.313	349.483	28.32	0.00307887	1789.9	217.818	369.089	-151.271
Septum formation protein Maf	2	22	20	45	79	89	1	10	58.9275	268.502	324.918	7.29411	269.616	396.348	438.085	17.7	0.0949399	1763.69	217.449	368.016	-150.567
Bifunctional folate synthesis protein	1	5	4	22	27	69		14	29.4638	61.0232	64.9836	0	131.812	135.461	339.639	24.78	0.0483136	762.382	51.8235	202.304	-150.48
UDP-N-acetylmuramoylalanine--D-glutamate ligase	11	30	28	78	101	126	8	20	324.101	366.139	454.885	58.3528	467.335	506.723	620.21	35.4	0.0333806	2797.75	381.709	531.422	-149.714
Alpha-1%2C3-galactosidase B		21	5	50	48	50		9	0	256.298	81.2295	0	299.573	240.819	246.115	15.93	0.0635763	1124.03	112.509	262.169	-149.66
Holliday junction ATP-dependent DNA helicase RuvB	10	28	28	74	95	126	2	19	294.638	341.73	454.885	14.5882	443.369	476.621	620.21	33.63	0.0533622	2646.04	363.751	513.4	-149.649
IMPACT family member YigZ	8	28	20	62	95	102	5	12	235.71	341.73	324.918	36.4705	371.471	476.621	502.075	21.24	0.0224317	2288.99	300.786	450.055	-149.269
Multifunctional alkaline phosphatase superfamily protein PehA		3	2	25	13	61		10	0	36.6139	32.4918	0	149.787	65.2218	300.26	17.7	0.0498972	584.375	23.0352	171.756	-148.721
N-acetyl-gamma-glutamyl-phosphate reductase	4	24	17	65	52	98	3	14	117.855	292.912	276.18	21.8823	389.445	260.887	482.386	24.78	0.0777809	1841.55	228.982	377.573	-148.59
Bifunctional ligase/repressor BirA	12	22	22	86	94	89	7	18	353.565	268.502	357.41	51.0587	515.266	471.603	438.085	31.86	0.00770817	2455.49	326.492	474.985	-148.492
Serine/threonine-protein kinase PK-1		15	5	40	23	72	4	21	0	183.07	81.2295	29.1764	239.659	115.392	354.406	37.17	0.0816287	1002.93	88.0997	236.486	-148.386
O-acetylserine sulfhydrylase		14	3	34	26	67		12	0	170.865	48.7377	0	203.71	130.444	329.794	21.24	0.0638798	883.55	73.2009	221.316	-148.115
Anthranilate synthase component 1	6	16	20	64	48	105	2	17	176.783	195.274	324.918	14.5882	383.454	240.819	516.842	30.09	0.0920341	1852.68	232.325	380.371	-148.047
NADP-reducing hydrogenase subunit HndA	2	10	2	39	56	29	1	4	58.9275	122.046	32.4918	7.29411	233.667	280.955	142.747	7.08	0.0189754	878.129	71.1553	219.123	-147.968
Cell division protein FtsA	10	31	19	64	83	127	8	19	294.638	378.344	308.672	58.3528	383.454	416.416	625.132	33.63	0.0691578	2465.01	327.218	475.001	-147.783
Lipid-A-disaccharide synthase	6	20	10	46	54	97	3	11	176.783	244.093	162.459	21.8823	275.608	270.921	477.463	19.47	0.0565092	1629.21	194.445	341.331	-146.886
Elongation factor G	20	36	32	96	168	116	14	38	589.275	439.367	519.869	102.117	575.181	842.866	570.987	67.26	0.107623	3639.66	516.17	663.011	-146.841
Ferredoxin-2		11	8	34	37	64		7	0	134.251	129.967	0	203.71	185.631	315.027	12.39	0.0351107	968.587	88.0728	234.789	-146.717
Phosphopantetheine adenylyltransferase	10	22	24	66	87	114	5	22	294.638	268.502	389.902	36.4705	395.437	436.484	561.142	38.94	0.0385811	2382.58	317.68	464.354	-146.674
Fimbrium subunit Fim1C		15		37	13	68		4	0	183.07	0	0	221.684	65.2218	334.717	7.08	0.107177	804.692	61.0232	207.208	-146.184
tRNA (guanine-N(1)-)-methyltransferase	11	28	17	58	96	112	6	17	324.101	341.73	276.18	43.7646	347.505	481.638	551.298	30.09	0.0404629	2366.22	314.004	460.147	-146.143
Flavoredoxin	2	11	4	33	42	58		12	58.9275	134.251	64.9836	0	197.718	210.716	285.493	21.24	0.00819923	952.091	86.0541	231.309	-145.255
[LysW]-aminoadipate semialdehyde transaminase		9		30	10	64		11	0	109.842	0	0	179.744	50.1706	315.027	19.47	0.081149	654.784	36.6139	181.647	-145.033
Signal peptidase I W		11	1	42	36	31		6	0	134.251	16.2459	0	251.642	180.614	152.591	10.62	0.0242077	735.344	50.1657	194.949	-144.783
N-(5'-phosphoribosyl)anthranilate isomerase	1	15	14	41	37	90		13	29.4638	183.07	227.443	0	245.65	185.631	443.007	23.01	0.107201	1314.26	146.659	291.429	-144.771
NADP-reducing hydrogenase subunit HndC	8	9	2	38	91	26	5	11	235.71	109.842	32.4918	36.4705	227.676	456.552	127.98	19.47	0.136323	1226.72	126.015	270.736	-144.721
Glutamate 5-kinase	5	13	20	52	48	104	4	18	147.319	158.66	324.918	29.1764	311.556	240.819	511.919	31.86	0.10995	1724.37	210.299	354.765	-144.466
ECF RNA polymerase sigma factor SigW	11	39	15	74	89	119	2	26	324.101	475.981	243.688	14.5882	443.369	446.518	585.754	46.02	0.0783908	2534	347.924	491.88	-143.957
NAD(P)H-quinone oxidoreductase subunit I%2C chloroplastic	4	13	10	52	53	59	2	16	117.855	158.66	162.459	14.5882	311.556	265.904	290.416	28.32	0.000910022	1321.44	146.325	289.292	-142.967
Chorismate dehydratase		10	3	30	13	72		9	0	122.046	48.7377	0	179.744	65.2218	354.406	15.93	0.0962571	770.156	56.9281	199.791	-142.862
Ribonuclease R	12	29	22	76	88	121	9	22	353.565	353.935	357.41	65.647	455.352	441.501	595.598	38.94	0.02218	2623.01	354.97	497.484	-142.514
Anthranilate phosphoribosyltransferase	5	9	11	50	27	87		14	147.319	109.842	178.705	0	299.573	135.461	428.24	24.78	0.0884866	1299.14	145.289	287.758	-142.47
Formate-dependent phosphoribosylglycinamide formyltransferase	2	9	2	34	13	73		10	58.9275	109.842	32.4918	0	203.71	65.2218	359.328	17.7	0.09041	829.521	67.087	209.42	-142.333
LPS-assembly protein LptD	11	27	10	50	80	110	5	18	324.101	329.525	162.459	36.4705	299.573	401.365	541.453	31.86	0.0927797	2094.95	272.029	414.13	-142.102
Internalin-J		7		35	16	45		6	0	85.4325	0	0	209.701	80.2729	221.504	10.62	0.0282922	596.91	28.4775	170.493	-142.015
Peptide chain release factor 2	7	23	16	48	96	82	5	11	206.246	280.707	259.934	36.4705	287.59	481.638	403.629	19.47	0.039526	1956.21	248.963	390.952	-141.99
V-type sodium ATPase subunit K	3	8	10	34	47	68	1	13	88.3913	97.6372	162.459	7.29411	203.71	235.802	334.717	23.01	0.0181307	1130.01	116.162	258.076	-141.914
Carboxynorspermidine/carboxyspermidine decarboxylase	3	16	8	40	37	84		9	88.3913	195.274	129.967	0	239.659	185.631	413.473	15.93	0.0667734	1252.4	137.878	279.588	-141.71
putative chromate transport protein	5	30	21	67	66	111	2	17	147.319	366.139	341.164	14.5882	401.428	331.126	546.375	30.09	0.103037	2148.14	284.874	426.31	-141.436
Endonuclease III	13	24	20	72	91	109	4	25	383.029	292.912	324.918	29.1764	431.386	456.552	536.531	44.25	0.013338	2454.5	333.619	474.823	-141.203
Serine acetyltransferase	6	20	22	64	65	100	2	19	176.783	244.093	357.41	14.5882	383.454	326.109	492.23	33.63	0.0602923	1994.67	259.428	400.598	-141.169
tRNA dimethylallyltransferase	11	31	25	77	121	94	6	12	324.101	378.344	406.147	43.7646	461.343	607.064	462.696	21.24	0.0297987	2683.46	369.531	510.368	-140.837
Chondroitinase-AC		4		20	15	56		5	0	48.8186	0	0	119.829	75.2559	275.649	8.85	0.0444933	519.553	16.2729	156.911	-140.639
Dihydroorotase	10	21	21	67	69	115	2	21	294.638	256.298	341.164	14.5882	401.428	346.177	566.065	37.17	0.0584193	2220.36	297.366	437.89	-140.524
Ribosomal large subunit pseudouridine synthase A	5	20	10	41	57	90	3	12	147.319	244.093	162.459	21.8823	245.65	285.972	443.007	21.24	0.0527471	1550.38	184.624	324.877	-140.253
Alpha-xylosidase BoGH31A	1	5	6	39	9	67		10	29.4638	61.0232	97.4754	0	233.667	45.1535	329.794	17.7	0.0889277	796.577	62.6541	202.872	-140.218
5%2C10-methylenetetrahydrofolate reductase	4	10	11	41	28	92	3	13	117.855	122.046	178.705	21.8823	245.65	140.478	452.852	23.01	0.104833	1279.47	139.535	279.66	-140.124
4-hydroxy-3-methylbut-2-enyl diphosphate reductase	8	20	19	52	65	116	5	19	235.71	244.093	308.672	36.4705	311.556	326.109	570.987	33.63	0.091866	2033.6	262.825	402.884	-140.059
Ferredoxin	11	46	21	71	158	87	4	21	324.101	561.414	341.164	29.1764	425.394	792.695	428.24	37.17	0.193065	2902.19	408.893	548.777	-139.884
DNA gyrase subunit B	21	52	39	101	186	156	8	35	618.739	634.642	633.59	58.3528	605.138	933.173	767.879	61.95	0.107309	4251.51	628.99	768.73	-139.74
Single-stranded-DNA-specific exonuclease RecJ	13	24	26	80	97	112	5	17	383.029	292.912	422.393	36.4705	479.317	486.655	551.298	30.09	0.017608	2652.07	366.111	505.757	-139.645
Ribose import permease protein RbsC	8	15	14	93	51	51	3	8	235.71	183.07	227.443	21.8823	557.207	255.87	251.037	14.16	0.122999	1732.22	215.407	354.705	-139.297
5'-nucleotidase SurE	5	19	11	37	57	95	1	5	147.319	231.888	178.705	7.29411	221.684	285.972	467.619	8.85	0.0738667	1540.48	185.971	325.092	-139.121
Aspartate 1-decarboxylase	4	11	9	36	46	75	1	11	117.855	134.251	146.213	7.29411	215.693	230.785	369.173	19.47	0.0241874	1221.26	132.773	271.883	-139.11
Osmoregulated proline transporter OpuE		13	7	39	53	38	1	5	0	158.66	113.721	7.29411	233.667	265.904	187.047	8.85	0.0290453	966.295	90.7939	228.873	-138.079
Tryptophan synthase alpha chain	5	10	18	58	32	95	2	14	147.319	122.046	292.426	14.5882	347.505	160.546	467.619	24.78	0.127517	1552.05	187.264	325.223	-137.959
Acetolactate synthase large subunit	2	15	20	51	59	77		9	58.9275	183.07	324.918	0	305.565	296.006	379.017	15.93	0.0823395	1547.5	188.972	326.863	-137.891
Cell division protein FtsZ	11	30	22	73	89	117	7	19	324.101	366.139	357.41	51.0587	437.377	446.518	575.909	33.63	0.0209295	2558.51	349.217	486.602	-137.385
Bifunctional purine biosynthesis protein PurH	10	25	22	71	85	105	9	24	294.638	305.116	357.41	65.647	425.394	426.45	516.842	42.48	0.00946102	2391.5	319.055	456.229	-137.174
Lipoprotein-releasing system transmembrane protein LolE	11	16	7	36	64	103	3	16	324.101	195.274	113.721	21.8823	215.693	321.092	506.997	28.32	0.130932	1698.76	211.032	347.927	-136.895
GTP cyclohydrolase 1	5	16	9	38	56	79	3	17	147.319	195.274	146.213	21.8823	227.676	280.955	388.862	30.09	0.0265098	1408.18	162.935	299.164	-136.229
All-trans-nonaprenyl-diphosphate synthase (geranyl-diphosphate specific)		10		20	21	62		7	0	122.046	0	0	119.829	105.358	305.183	12.39	0.0741337	652.417	40.6822	176.79	-136.108
Threonylcarbamoyladenosine tRNA methylthiotransferase MtaB	9	19	18	58	84	87	3	17	265.174	231.888	292.426	21.8823	347.505	421.433	428.24	30.09	0.00606537	2008.55	263.163	399.059	-135.897
Folylpolyglutamate synthase	3	20	18	59	47	90		13	88.3913	244.093	292.426	0	353.497	235.802	443.007	23.01	0.094655	1657.22	208.303	344.102	-135.798
Exo-beta-D-glucosaminidase	2	4	7	28	30	63		3	58.9275	48.8186	113.721	0	167.761	150.512	310.105	5.31	0.0336879	849.845	73.8225	209.459	-135.637
putative dual-specificity RNA methyltransferase RlmN	7	14	13	50	65	75	1	13	206.246	170.865	211.197	7.29411	299.573	326.109	369.173	23.01	0.00239605	1590.46	196.103	331.618	-135.516
Pyrroline-5-carboxylate reductase	8	25	28	75	75	117	7	28	235.71	305.116	454.885	51.0587	449.36	376.279	575.909	49.56	0.0976331	2448.32	331.904	467.183	-135.279
Fructose-1%2C6-bisphosphatase class 3	1	6	9	43	29	51		9	29.4638	73.2279	146.213	0	257.633	145.495	251.037	15.93	0.0266884	903.07	82.9682	218.055	-135.087
Serine hydroxymethyltransferase	9	23	11	54	90	72	3	18	265.174	280.707	178.705	21.8823	323.539	451.535	354.406	31.86	0.0269764	1875.95	241.529	376.493	-134.965
Cell division protein FtsX	10	19	15	61	64	99	4	15	294.638	231.888	243.688	29.1764	365.48	321.092	487.308	26.55	0.0325029	1973.27	256.738	391.293	-134.555
Demethylmenaquinone methyltransferase		17	19	37	35	106		12	0	207.479	308.672	0	221.684	175.597	521.764	21.24	0.198206	1435.2	172.05	306.348	-134.298
23S rRNA (uracil-C(5))-methyltransferase RlmCD	10	24	29	75	85	119	1	23	294.638	292.912	471.131	7.29411	449.36	426.45	585.754	40.71	0.0785656	2527.54	352.893	487.188	-134.295
Diadenosine hexaphosphate hydrolase	2	11	4	21	33	75		10	58.9275	134.251	64.9836	0	125.821	165.563	369.173	17.7	0.0826944	918.719	86.0541	220.185	-134.131
Prolipoprotein diacylglyceryl transferase	10	29	35	82	112	115	5	26	294.638	353.935	568.606	36.4705	491.3	561.91	566.065	46.02	0.0984744	2872.92	405.726	539.759	-134.032
Ferredoxin-dependent glutamate synthase 1	5	18	14	56	60	73	4	16	147.319	219.684	227.443	29.1764	335.522	301.023	359.328	28.32	0.00598188	1619.5	198.148	331.958	-133.81
Phospho-N-acetylmuramoyl-pentapeptide-transferase	14	28	22	84	103	100	7	17	412.493	341.73	357.41	51.0587	503.283	516.757	492.23	30.09	0.00205237	2674.96	370.544	504.09	-133.546
Isoleucine--tRNA ligase	12	23	20	60	104	97	10	21	353.565	280.707	324.918	72.9411	359.488	521.774	477.463	37.17	0.0327031	2390.86	319.73	452.908	-133.178
Superoxide dismutase [Mn/Fe]		3	3	24	14	55		8	0	36.6139	48.7377	0	143.795	70.2388	270.727	14.16	0.0460331	570.112	28.4505	161.587	-133.136
Multifunctional CCA protein	7	18	8	42	48	94	4	13	206.246	219.684	129.967	29.1764	251.642	240.819	462.696	23.01	0.0804043	1540.23	185.299	318.386	-133.087
D-inositol 3-phosphate glycosyltransferase	4	14	8	39	33	85	2	6	117.855	170.865	129.967	14.5882	233.667	165.563	418.396	10.62	0.0800671	1250.9	139.562	272.542	-132.98
ATP-dependent RNA helicase RhlE	17	29	19	85	84	128	9	16	500.884	353.935	308.672	65.647	509.275	421.433	630.055	28.32	0.0946102	2789.9	387.83	520.254	-132.424
Bifunctional transcriptional activator/DNA repair enzyme AdaA		15	2	31	38	48		3	0	183.07	32.4918	0	185.736	190.648	236.27	5.31	0.0434797	828.216	71.8538	204.218	-132.364
D-threonate 4-phosphate dehydrogenase		11	2	27	20	61		9	0	134.251	32.4918	0	161.77	100.341	300.26	15.93	0.0697119	729.114	55.581	187.457	-131.876
N(1)-aminopropylagmatine ureohydrolase		14	7	30	27	74		14	0	170.865	113.721	0	179.744	135.461	364.25	24.78	0.100737	964.041	94.8621	226.485	-131.623
putative ABC transporter ATP-binding protein YbiT	13	28	32	96	114	100	7	27	383.029	341.73	519.869	51.0587	575.181	571.945	492.23	47.79	0.0472302	2935.04	414.876	546.452	-131.576
Enoyl-[acyl-carrier-protein] reductase [NADH] FabI	2	7	4	22	29	66		11	58.9275	85.4325	64.9836	0	131.812	145.495	324.872	19.47	0.0525338	811.523	69.7812	200.726	-130.945
Dihydroorotate dehydrogenase B (NAD(+))%2C electron transfer subunit	5	21	17	48	73	85	3	15	147.319	256.298	276.18	21.8823	287.59	366.245	418.396	26.55	0.0384619	1773.91	226.599	357.41	-130.812
Phosphoribosylamine--glycine ligase	7	34	22	68	90	104	5	21	206.246	414.958	357.41	36.4705	407.42	451.535	511.919	37.17	0.0659465	2385.96	326.205	456.958	-130.753
60 kDa chaperonin	12	25	13	57	102	83	3	16	353.565	305.116	211.197	21.8823	341.514	511.74	408.551	28.32	0.0569794	2153.56	289.959	420.602	-130.642
Uronate isomerase	4	13	4	39	27	74	2	10	117.855	158.66	64.9836	14.5882	233.667	135.461	364.25	17.7	0.0710743	1089.47	113.833	244.459	-130.626
Phosphoribosyl-AMP cyclohydrolase	4	14	15	46	38	93		13	117.855	170.865	243.688	0	275.608	190.648	457.774	23.01	0.10358	1456.44	177.47	308.01	-130.54
N5-carboxyaminoimidazole ribonucleotide mutase	7	29	27	69	84	112	10	29	206.246	353.935	438.639	72.9411	413.411	421.433	551.298	51.33	0.0937079	2457.9	332.94	462.047	-129.107
Dihydroneopterin aldolase	6	13	3	36	41	71	5	14	176.783	158.66	48.7377	36.4705	215.693	205.699	349.483	24.78	0.0515231	1191.53	128.06	256.959	-128.898
Putative zinc metalloprotease	2	13	14	31	56	74	1	13	58.9275	158.66	227.443	7.29411	185.736	280.955	364.25	23.01	0.0722988	1283.27	148.344	276.98	-128.637
Ribonuclease G	5	11	4	36	44	60	2	12	147.319	134.251	64.9836	14.5882	215.693	220.751	295.338	21.24	0.0120034	1092.92	115.518	243.927	-128.409
Omega-amidase YafV		6	3	22	9	67		1	0	73.2279	48.7377	0	131.812	45.1535	329.794	1.77	0.107084	628.726	40.6552	168.92	-128.265
Tyrosine--tRNA ligase	13	18	21	66	80	108	2	20	383.029	219.684	341.164	14.5882	395.437	401.365	531.609	35.4	0.0623264	2286.87	314.625	442.803	-128.178
Pantothenate synthetase	6	12	7	41	47	69	2	14	176.783	146.456	113.721	14.5882	245.65	235.802	339.639	24.78	0.0137661	1272.64	145.653	273.697	-128.044
Signal peptidase I	8	15	12	44	60	88	4	11	235.71	183.07	194.951	29.1764	263.625	301.023	433.163	19.47	0.0380798	1640.72	204.577	332.604	-128.027
ATP-dependent DNA helicase RecG	13	25	23	68	92	117	5	17	383.029	305.116	373.656	36.4705	407.42	461.569	575.909	30.09	0.0412455	2543.17	353.934	481.633	-127.699
Phosphoribosylglycinamide formyltransferase	7	28	20	62	87	91	2	17	206.246	341.73	324.918	14.5882	371.471	436.484	447.929	30.09	0.0295777	2143.37	290.965	418.628	-127.663
Low molecular weight protein-tyrosine-phosphatase YfkJ	3	7	11	34	49	58		12	88.3913	85.4325	178.705	0	203.71	245.836	285.493	21.24	0.0149922	1087.57	117.51	245.013	-127.504
putative ATP-dependent transporter SufC	2	11	3	24	29	68	1	11	58.9275	134.251	48.7377	7.29411	143.795	145.495	334.717	19.47	0.0690252	873.217	80.6388	208.002	-127.363
Membrane protein insertase YidC	12	12	13	47	80	83	6	16	353.565	146.456	211.197	43.7646	281.599	401.365	408.551	28.32	0.0803524	1846.5	237.073	363.838	-126.766
Methylmalonyl-CoA mutase large subunit		9	2	26	25	49		7	0	109.842	32.4918	0	155.778	125.426	241.193	12.39	0.0280924	664.731	47.4445	174.132	-126.688
Acyl-coenzyme A thioesterase PaaI		3	2	17	13	57		8	0	36.6139	32.4918	0	101.855	65.2218	280.571	14.16	0.067518	516.754	23.0352	149.216	-126.181
High molecular weight rubredoxin		6		25	18	43		2	0	73.2279	0	0	149.787	90.307	211.659	3.54	0.0208802	524.981	24.4093	150.584	-126.175
Type III pantothenate kinase	9	29	24	70	76	119	2	16	265.174	353.935	389.902	14.5882	419.403	381.296	585.754	28.32	0.0797254	2410.05	336.337	462.151	-125.814
Xylose isomerase	3	11	5	30	45	56		18	88.3913	134.251	81.2295	0	179.744	225.768	275.649	31.86	0.00881114	985.032	101.291	227.054	-125.763
putative HIT-like protein		7	4	20	44	38	1	6	0	85.4325	64.9836	7.29411	119.829	220.751	187.047	10.62	0.0164399	685.338	50.1387	175.876	-125.737
DNA polymerase III subunit alpha	13	43	31	85	151	106	4	23	383.029	524.8	503.623	29.1764	509.275	757.576	521.764	40.71	0.121873	3229.24	470.484	596.205	-125.721
Regulatory protein RecX	12	27	23	62	92	122	4	16	353.565	329.525	373.656	29.1764	371.471	461.569	600.521	28.32	0.0688556	2519.48	352.249	477.854	-125.605
Dodecaprenyl-phosphate galacturonate synthase		10		18	18	61		7	0	122.046	0	0	107.846	90.307	300.26	12.39	0.0928458	620.46	40.6822	166.138	-125.456
ATP-dependent Clp protease ATP-binding subunit ClpX	12	28	24	78	99	101	4	16	353.565	341.73	389.902	29.1764	467.335	496.689	497.152	28.32	0.0010128	2575.55	361.732	487.059	-125.326
UvrABC system protein C	12	37	29	80	110	126	4	22	353.565	451.572	471.131	29.1764	479.317	551.876	620.21	38.94	0.0418538	2956.85	425.423	550.468	-125.045
Lon protease 1	2	14	15	44	43	75	1	7	58.9275	170.865	243.688	7.29411	263.625	215.733	369.173	12.39	0.0749791	1329.31	157.827	282.844	-125.017
Vitamin B12-dependent ribonucleoside-diphosphate reductase	3	18	8	32	57	68	2	13	88.3913	219.684	129.967	14.5882	191.727	285.972	334.717	23.01	0.0471142	1265.05	146.014	270.805	-124.791
Putative thiazole biosynthetic enzyme	1	11	8	21	43	66	1	4	29.4638	134.251	129.967	7.29411	125.821	215.733	324.872	7.08	0.068562	967.402	97.894	222.142	-124.248
1-deoxy-D-xylulose 5-phosphate reductoisomerase	11	27	25	75	87	111	3	22	324.101	329.525	406.147	21.8823	449.36	436.484	546.375	38.94	0.0233251	2513.88	353.258	477.407	-124.148
dTDP-glucose 4%2C6-dehydratase	6	10	12	50	33	81		12	176.783	122.046	194.951	0	299.573	165.563	398.706	21.24	0.0786989	1357.62	164.593	287.948	-123.354
tRNA-Arg(cct)	6	18	14	48	73	69	7	25	176.783	219.684	227.443	51.0587	287.59	366.245	339.639	44.25	0.00581813	1668.44	207.97	331.158	-123.189
Di-/tripeptide transporter	2	6		25	23	48	2	1	58.9275	73.2279	0	14.5882	149.787	115.392	236.27	1.77	0.0219412	648.193	44.0518	167.15	-123.098
Thiamine-phosphate synthase	9	33	13	47	71	124	3	12	265.174	402.753	211.197	21.8823	281.599	356.211	610.365	21.24	0.171932	2149.18	293.041	416.059	-123.017
Putative lipid kinase YtlR		6	4	22	13	63		9	0	73.2279	64.9836	0	131.812	65.2218	310.105	15.93	0.0920223	645.351	46.0705	169.046	-122.976
Na(+)/H(+) antiporter NhaA	5	15	2	36	34	70	2	13	147.319	183.07	32.4918	14.5882	215.693	170.58	344.561	23.01	0.0753738	1108.3	120.96	243.611	-122.651
Endoribonuclease YbeY	11	27	21	56	86	121	4	21	324.101	329.525	341.164	29.1764	335.522	431.467	595.598	37.17	0.091231	2386.55	331.597	454.196	-122.599
FAD:protein FMN transferase	11	21	24	71	70	114	5	18	324.101	256.298	389.902	36.4705	425.394	351.194	561.142	31.86	0.0833647	2344.5	323.434	445.91	-122.477
Transcriptional regulator MraZ	3	7	7	36	59	29	2	7	88.3913	85.4325	113.721	14.5882	215.693	296.006	142.747	12.39	0.0268207	956.579	95.8484	218.149	-122.3
Dipeptidyl-peptidase 5	2	12	3	28	54	37	2	8	58.9275	146.456	48.7377	14.5882	167.761	270.921	182.125	14.16	0.0261853	889.517	84.707	206.936	-122.229
Unsaturated rhamnogalacturonyl hydrolase YteR		3		17	10	51		2	0	36.6139	0	0	101.855	50.1706	251.037	3.54	0.0588596	439.677	12.2046	134.354	-122.15
Transcriptional regulatory protein BtsR	3	14	3	40	16	72		21	88.3913	170.865	48.7377	0	239.659	80.2729	354.406	37.17	0.117095	982.331	102.665	224.779	-122.114
tRNA1(Val) (adenine(37)-N6)-methyltransferase	10	27	18	54	87	106	2	18	294.638	329.525	292.426	14.5882	323.539	436.484	521.764	31.86	0.0532813	2212.96	305.53	427.262	-121.733
Electron transport complex subunit RnfG	1	9	3	22	26	59		6	29.4638	109.842	48.7377	0	131.812	130.444	290.416	10.62	0.0528615	740.715	62.6811	184.224	-121.543
putative oxidoreductase UxuB	2	4	1	28	8	57		4	58.9275	48.8186	16.2459	0	167.761	40.1365	280.571	7.08	0.0802754	612.461	41.3307	162.823	-121.492
2-oxoglutarate carboxylase large subunit		9	7	17	35	63		6	0	109.842	113.721	0	101.855	175.597	310.105	10.62	0.0823751	811.12	74.521	195.852	-121.331
L-aspartate oxidase	3	21	11	42	59	69	5	12	88.3913	256.298	178.705	36.4705	251.642	296.006	339.639	21.24	0.0455646	1447.15	174.465	295.762	-121.298
Methionyl-tRNA formyltransferase	15	27	23	77	95	116	6	19	441.956	329.525	373.656	43.7646	461.343	476.621	570.987	33.63	0.0313404	2697.85	381.713	502.984	-121.271
Inner membrane protein YqaA	4	14	2	25	37	71	3	10	117.855	170.865	32.4918	21.8823	149.787	185.631	349.483	17.7	0.0872198	1028	107.071	228.3	-121.23
Immune inhibitor A		5		10	54	19		2	0	61.0232	0	0	59.9147	270.921	93.5237	3.54	0.0759935	485.383	20.3411	141.453	-121.112
Phosphoribosylaminoimidazole-succinocarboxamide synthase	7	26	21	58	86	91	4	23	206.246	317.321	341.164	29.1764	347.505	431.467	447.929	40.71	0.04033	2120.81	288.244	408.967	-120.724
Putative O-methyltransferase/MSMEI_4947		11		24	26	45		7	0	134.251	0	0	143.795	130.444	221.504	12.39	0.0426902	629.993	44.7504	165.247	-120.497
Tyrosine-protein phosphatase YwqE		9		28	32	29		5	0	109.842	0	0	167.761	160.546	142.747	8.85	0.0160985	580.896	36.6139	157.018	-120.404
Altronate dehydratase		8	1	37	18	33		2	0	97.6372	16.2459	0	221.684	90.307	162.436	3.54	0.0342378	588.31	37.961	158.142	-120.181
Dephospho-CoA kinase	10	27	27	62	85	127	6	25	294.638	329.525	438.639	43.7646	371.471	426.45	625.132	44.25	0.122975	2529.62	354.267	474.351	-120.084
Putrescine aminotransferase		11	2	22	14	66		7	0	134.251	32.4918	0	131.812	70.2388	324.872	12.39	0.119199	693.666	55.581	175.641	-120.06
putative FKBP-type peptidyl-prolyl cis-trans isomerase FkpA		7	2	12	22	60	2	9	0	85.4325	32.4918	14.5882	71.8976	110.375	295.338	15.93	0.0886782	610.124	39.3081	159.204	-119.896
Phosphomethylpyrimidine synthase	2	10	7	28	31	67	2	13	58.9275	122.046	113.721	14.5882	167.761	155.529	329.794	23.01	0.0576525	962.368	98.2318	217.695	-119.463
Long-chain-fatty-acid--CoA ligase	12	13	5	51	65	65	5	12	353.565	158.66	81.2295	36.4705	305.565	326.109	319.95	21.24	0.10782	1581.55	197.818	317.208	-119.389
Carboxy-terminal processing protease CtpB	5	19	5	34	47	77	3	9	147.319	231.888	81.2295	21.8823	203.71	235.802	379.017	15.93	0.0800906	1300.85	153.479	272.843	-119.364
Pyruvate%2C phosphate dikinase	2	17	5	28	61	47		11	58.9275	207.479	81.2295	0	167.761	306.041	231.348	19.47	0.061499	1052.79	115.879	235.05	-119.171
Rod shape-determining protein MreB	13	18	13	46	100	80	5	16	383.029	219.684	211.197	36.4705	275.608	501.706	393.784	28.32	0.119138	2021.48	271.303	390.366	-119.063
Chaperone protein DnaJ	17	38	37	97	134	136	15	52	500.884	463.777	601.098	109.412	581.172	672.286	669.433	92.04	0.0394609	3598.06	521.92	640.964	-119.044
Nicotinate-nucleotide adenylyltransferase	3	17	16	48	52	74	2	17	88.3913	207.479	259.934	14.5882	287.59	260.887	364.25	30.09	0.0579929	1483.12	185.268	304.243	-118.974
Queuine tRNA-ribosyltransferase	12	26	24	73	99	98	5	21	353.565	317.321	389.902	36.4705	437.377	496.689	482.386	37.17	0.00629721	2513.71	353.596	472.15	-118.555
Exo-poly-alpha-D-galacturonosidase		2	1	10	16	52		2	0	24.4093	16.2459	0	59.9147	80.2729	255.96	3.54	0.0657572	436.802	13.5517	132.049	-118.497
Alkaline phosphatase synthesis sensor protein PhoR	8	41	33	103	109	94	1	19	235.71	500.391	536.115	7.29411	617.121	546.859	462.696	33.63	0.161171	2906.19	424.072	542.226	-118.154
Ribosomal RNA large subunit methyltransferase K		9	6	33	37	36	1	16	0	109.842	97.4754	7.29411	197.718	185.631	177.203	28.32	0.0144055	775.164	69.1057	186.851	-117.745
Apolipoprotein N-acyltransferase	9	15	11	42	48	99	6	16	265.174	183.07	178.705	43.7646	251.642	240.819	487.308	28.32	0.11979	1650.48	208.983	326.589	-117.607
30S ribosome-binding factor	5	11	5	32	18	88		17	147.319	134.251	81.2295	0	191.727	90.307	433.163	30.09	0.16026	1078	120.933	238.399	-117.466
N-acetylhexosamine 1-kinase		7	1	31	25	29		1	0	85.4325	16.2459	0	185.736	125.426	142.747	1.77	0.0104266	555.587	33.8928	151.303	-117.41
Phosphate acetyltransferase	15	24	22	72	91	113	4	23	441.956	292.912	357.41	29.1764	431.386	456.552	556.22	40.71	0.0556526	2565.61	364.093	481.386	-117.293
UDP-N-acetyl-D-glucosamine 6-dehydrogenase		12		20	41	35		3	0	146.456	0	0	119.829	205.699	172.281	5.31	0.0497951	644.265	48.8186	165.936	-117.118
tRNA-Glu(ctc)		4		17	29	31	4	22	0	48.8186	0	29.1764	101.855	145.495	152.591	38.94	0.00337139	477.936	16.2729	133.314	-117.041
Fluoroacetyl-CoA thioesterase	1	10	7	30	27	61		5	29.4638	122.046	113.721	0	179.744	135.461	300.26	8.85	0.0559452	880.697	88.4105	205.155	-116.744
Protein GrpE	9	26	22	55	101	92	4	27	265.174	317.321	357.41	29.1764	329.531	506.723	452.852	47.79	0.0595441	2258.19	313.301	429.702	-116.4
Na(+)/H(+)-K(+) antiporter GerN	3	19	9	28	68	62	1	7	88.3913	231.888	146.213	7.29411	167.761	341.16	305.183	12.39	0.0801096	1287.89	155.498	271.368	-115.87
N5-carboxyaminoimidazole ribonucleotide synthase	6	13	6	37	26	87	4	18	176.783	158.66	97.4754	29.1764	221.684	130.444	428.24	31.86	0.1367	1242.46	144.306	260.123	-115.817
putative undecaprenyl-phosphate N-acetylglucosaminyl 1-phosphate transferase	2	13	4	29	32	60		6	58.9275	158.66	64.9836	0	173.753	160.546	295.338	10.62	0.0487284	912.208	94.1905	209.879	-115.688
putative amino-acid metabolite efflux pump		4	1	20	19	40		7	0	48.8186	16.2459	0	119.829	95.3241	196.892	12.39	0.0133662	477.11	21.6882	137.349	-115.66
DNA repair protein RecO	14	23	17	59	80	114	4	18	412.493	280.707	276.18	29.1764	353.497	401.365	561.142	31.86	0.104093	2314.56	323.127	438.668	-115.541
Methionine--tRNA ligase	17	28	32	82	122	123	6	31	500.884	341.73	519.869	43.7646	491.3	612.081	605.443	54.87	0.0842092	3115.07	454.161	569.608	-115.447
1-deoxy-D-xylulose-5-phosphate synthase	19	48	45	127	134	160	6	33	559.811	585.823	731.065	43.7646	760.916	672.286	787.568	58.41	0.0729921	4141.24	625.567	740.257	-114.69
Formyltetrahydrofolate deformylase	4	3	3	31	23	50	2	10	117.855	36.6139	48.7377	14.5882	185.736	115.392	246.115	17.7	0.0325959	765.038	67.7356	182.414	-114.679
Nicotinamide-nucleotide amidohydrolase PncC	12	17	9	56	61	83	4	15	353.565	207.479	146.213	29.1764	335.522	306.041	408.551	26.55	0.0856162	1786.55	235.752	350.038	-114.286
Putative oxidoreductase SadH	1	7	1	22	26	43		9	29.4638	85.4325	16.2459	0	131.812	130.444	211.659	15.93	0.014421	605.057	43.7141	157.972	-114.258
Oligopeptidase A	5	15	4	33	37	72	5	18	147.319	183.07	64.9836	36.4705	197.718	185.631	354.406	31.86	0.0760827	1169.6	131.791	245.918	-114.128
Dihydroorotate dehydrogenase (quinone)	6	10	2	30	15	85	1	11	176.783	122.046	32.4918	7.29411	179.744	75.2559	418.396	19.47	0.179068	1012.01	110.44	224.465	-114.025
Photosystem I assembly protein Ycf3	5	8	14	34	50	73	4	11	147.319	97.6372	227.443	29.1764	203.71	250.853	359.328	19.47	0.064385	1315.47	157.466	271.297	-113.831
Ribose-5-phosphate isomerase B	3	17	11	41	41	74		13	88.3913	207.479	178.705	0	245.65	205.699	364.25	23.01	0.0646048	1290.18	158.192	271.867	-113.675
Erythronate-4-phosphate dehydrogenase	4	16	5	35	38	68	3	14	117.855	195.274	81.2295	21.8823	209.701	190.648	334.717	24.78	0.0569689	1151.31	131.453	245.022	-113.569
Multidrug export protein MepA	40	111	94	308	270	244	9	42	1178.55	1354.72	1527.11	65.647	1845.37	1354.61	1201.04	74.34	0.315605	8527.05	1353.46	1467.01	-113.546
Iota-carrageenase		17		25	43	37		3	0	207.479	0	0	149.787	215.733	182.125	5.31	0.0945483	755.124	69.1597	182.548	-113.389
putative S-adenosylmethionine-dependent methyltransferase/MSMEI_2290		7	3	23	10	58		9	0	85.4325	48.7377	0	137.804	50.1706	285.493	15.93	0.0980872	607.638	44.7234	157.823	-113.099
Holliday junction ATP-dependent DNA helicase RuvA	12	24	23	61	98	102	3	21	353.565	292.912	373.656	21.8823	365.48	491.672	502.075	37.17	0.0436627	2401.24	340.044	453.075	-113.031
Glutamine synthetase	8	35	24	82	98	83	6	26	235.71	427.163	389.902	43.7646	491.3	491.672	408.551	46.02	0.078178	2488.06	350.925	463.841	-112.916
Formate acetyltransferase	10	22	18	64	83	80	3	17	294.638	268.502	292.426	21.8823	383.454	416.416	393.784	30.09	0.000464021	2071.1	285.189	397.885	-112.696
DNA replication and repair protein RecF	21	37	32	100	148	119	8	28	618.739	451.572	519.869	58.3528	599.147	742.525	585.754	49.56	0.0912866	3575.96	530.06	642.475	-112.415
DNA polymerase I	9	44	30	80	110	121	7	23	265.174	537.004	487.377	51.0587	479.317	551.876	595.598	40.71	0.140321	2967.41	429.852	542.264	-112.412
tRNA threonylcarbamoyladenosine dehydratase	9	25	18	51	82	98	4	21	265.174	305.116	292.426	29.1764	305.565	411.399	482.386	37.17	0.0501628	2091.24	287.572	399.783	-112.211
Ribosomal large subunit pseudouridine synthase D	17	45	55	111	158	167	7	29	500.884	549.209	893.524	51.0587	665.053	792.695	822.024	51.33	0.222956	4274.45	647.872	759.924	-112.052
4-deoxy-L-threo-5-hexosulose-uronate ketol-isomerase	2	9	2	27	15	61		8	58.9275	109.842	32.4918	0	161.77	75.2559	300.26	14.16	0.0907899	738.547	67.087	179.095	-112.008
Isopentenyl-diphosphate Delta-isomerase		4	2	20	19	41	1	6	0	48.8186	32.4918	7.29411	119.829	95.3241	201.814	10.62	0.016865	505.572	27.1035	138.989	-111.886
Inosine-5'-monophosphate dehydrogenase	11	33	30	86	102	106	10	31	324.101	402.753	487.377	72.9411	515.266	511.74	521.764	54.87	0.0387981	2835.94	404.744	516.257	-111.513
HTH-type transcriptional regulator Xre	6	7	10	56	52	33		10	176.783	85.4325	162.459	0	335.522	260.887	162.436	17.7	0.0626119	1183.52	141.558	252.948	-111.39
putative sugar kinase YdjH		2	3	20	21	37		1	0	24.4093	48.7377	0	119.829	105.358	182.125	1.77	0.00767204	480.46	24.3823	135.771	-111.389
Thiazole synthase	2	15	3	25	26	70	2	7	58.9275	183.07	48.7377	14.5882	149.787	130.444	344.561	12.39	0.120285	930.114	96.9116	208.264	-111.352
[FeFe] hydrogenase maturase subunit HydE	2	12	3	26	34	53		7	58.9275	146.456	48.7377	0	155.778	170.58	260.882	12.39	0.0349213	841.361	84.707	195.747	-111.04
Outer membrane protein 40		3		17	18	36		2	0	36.6139	0	0	101.855	90.307	177.203	3.54	0.0102792	405.979	12.2046	123.122	-110.917
HTH-type transcriptional repressor CytR	4	8	6	44	32	45	1	9	117.855	97.6372	97.4754	7.29411	263.625	160.546	221.504	15.93	0.0112267	965.936	104.323	215.225	-110.902
Fosmidomycin resistance protein		8		19	8	56		4	0	97.6372	0	0	113.838	40.1365	275.649	7.08	0.111504	527.26	32.5457	143.208	-110.662
Peptide chain release factor 3	2	13	7	31	49	47		9	58.9275	158.66	113.721	0	185.736	245.836	231.348	15.93	0.0157448	994.229	110.436	220.973	-110.537
V-type proton ATPase subunit E	8	17	15	44	65	87	3	16	235.71	207.479	243.688	21.8823	263.625	326.109	428.24	28.32	0.0441965	1726.73	228.959	339.325	-110.365
Ribonuclease D	6	16	9	35	48	81	1	12	176.783	195.274	146.213	7.29411	209.701	240.819	398.706	21.24	0.0704868	1374.79	172.757	283.076	-110.319
Peptide transporter CstA	2	5	10	34	11	72		5	58.9275	61.0232	162.459	0	203.71	55.1876	354.406	8.85	0.15038	895.713	94.1366	204.434	-110.298
putative ABC transporter ATP-binding protein YxlF	11	16	16	72	95	41	2	9	324.101	195.274	259.934	14.5882	431.386	476.621	201.814	15.93	0.150521	1903.72	259.77	369.94	-110.17
NAD(P)-specific glutamate dehydrogenase		6		22	11	44		6	0	73.2279	0	0	131.812	55.1876	216.581	10.62	0.0522435	476.809	24.4093	134.527	-110.118
23S rRNA (uridine(2479)-2'-O)-methyltransferase		8	1	13	21	53		7	0	97.6372	16.2459	0	77.8891	105.358	260.882	12.39	0.0814976	558.012	37.961	148.043	-110.082
tRNA(Ile)-lysidine synthase	10	25	26	74	85	98	5	18	294.638	305.116	422.393	36.4705	443.369	426.45	482.386	31.86	0.0337192	2410.82	340.716	450.735	-110.019
Arabinose operon regulatory protein	4	16	8	51	47	47		4	117.855	195.274	129.967	0	305.565	235.802	231.348	7.08	0.0159553	1215.81	147.699	257.572	-109.873
Glutamate formimidoyltransferase		10		23	32	31		6	0	122.046	0	0	137.804	160.546	152.591	10.62	0.0282129	572.987	40.6822	150.314	-109.631
tRNA threonylcarbamoyladenosine biosynthesis protein TsaE	12	25	26	67	97	106	5	18	353.565	305.116	422.393	36.4705	401.428	486.655	521.764	31.86	0.0452433	2527.39	360.358	469.949	-109.591
Undecaprenyl-phosphate mannosyltransferase		5	3	20	29	35		4	0	61.0232	48.7377	0	119.829	145.495	172.281	7.08	0.00520362	547.366	36.587	145.868	-109.281
Endonuclease 4	3	11	3	29	21	65	3	9	88.3913	134.251	48.7377	21.8823	173.753	105.358	319.95	15.93	0.0915946	892.323	90.46	199.687	-109.227
Mannose-6-phosphate isomerase ManA	2	13	11	41	56	40		6	58.9275	158.66	178.705	0	245.65	280.955	196.892	10.62	0.0348485	1119.79	132.098	241.166	-109.068
Inner membrane protein YjjP	7	12	5	36	41	69	4	9	206.246	146.456	81.2295	29.1764	215.693	205.699	339.639	15.93	0.062193	1224.14	144.644	253.677	-109.033
2-dehydro-3-deoxyphosphooctonate aldolase	6	17	12	52	37	83	3	13	176.783	207.479	194.951	21.8823	311.556	185.631	408.551	23.01	0.0850419	1506.83	193.071	301.913	-108.842
tRNA-Gln(ctg)	1	4	4	27	26	36	3	16	29.4638	48.8186	64.9836	21.8823	161.77	130.444	177.203	28.32	0.00159068	634.564	47.7553	156.472	-108.717
Thiol:disulfide interchange protein DsbD	7	16	16	53	51	84	5	20	206.246	195.274	259.934	36.4705	317.548	255.87	413.473	35.4	0.0479646	1684.82	220.485	328.964	-108.479
Glycine--tRNA ligase	6	18	18	49	73	72		15	176.783	219.684	292.426	0	293.582	366.245	354.406	26.55	0.0278117	1703.13	229.631	338.078	-108.447
Penicillin-binding protein 1A	9	19	18	56	60	97	6	16	265.174	231.888	292.426	43.7646	335.522	301.023	477.463	28.32	0.0646767	1947.26	263.163	371.336	-108.174
Riboflavin biosynthesis protein RibBA	6	17	12	43	42	88	4	9	176.783	207.479	194.951	29.1764	257.633	210.716	433.163	15.93	0.0953703	1509.9	193.071	300.504	-107.433
Ribosome maturation factor RimM	12	22	20	60	91	92	5	19	353.565	268.502	324.918	36.4705	359.488	456.552	452.852	33.63	0.0283293	2252.35	315.662	422.964	-107.302
putative chromosome-partitioning protein ParB	9	8	10	41	62	59	5	7	265.174	97.6372	162.459	36.4705	245.65	311.058	290.416	12.39	0.0551426	1408.86	175.09	282.375	-107.285
DNA polymerase III subunit tau	9	32	31	68	107	109	5	18	265.174	390.549	503.623	36.4705	407.42	536.825	536.531	31.86	0.12881	2676.59	386.448	493.592	-107.144
ATP-dependent RNA helicase CshA	1	14	2	23	29	55		9	29.4638	170.865	32.4918	0	137.804	145.495	270.727	15.93	0.0835046	786.846	77.6069	184.675	-107.068
Putative glutamine amidotransferase	4	10	9	38	17	80		12	117.855	122.046	146.213	0	227.676	85.29	393.784	21.24	0.149377	1092.86	128.705	235.583	-106.878
Ribosomal large subunit pseudouridine synthase B	8	23	21	53	92	81	3	11	235.71	280.707	341.164	21.8823	317.548	461.569	398.706	19.47	0.0538942	2057.29	285.86	392.608	-106.748
FMN reductase [NAD(P)H]	5	16	17	45	51	84	1	11	147.319	195.274	276.18	7.29411	269.616	255.87	413.473	19.47	0.0824381	1565.03	206.258	312.986	-106.729
Outer membrane protein MIP		18	1	19	43	46		3	0	219.684	16.2459	0	113.838	215.733	226.426	5.31	0.124759	791.927	78.6432	185.332	-106.689
Na(+)-translocating NADH-quinone reductase subunit C	4	9	6	28	41	55	4	14	117.855	109.842	97.4754	29.1764	167.761	205.699	270.727	24.78	0.0127895	998.536	108.391	214.729	-106.338
Protein YrdA	6	17	5	46	20	83		14	176.783	207.479	81.2295	0	275.608	100.341	408.551	24.78	0.167292	1249.99	155.164	261.5	-106.336
Signal recognition particle protein	12	26	21	62	95	98	4	17	353.565	317.321	341.164	29.1764	371.471	476.621	482.386	30.09	0.0238159	2371.7	337.35	443.492	-106.142
Tryptophan--tRNA ligase	10	22	25	69	84	92	7	18	294.638	268.502	406.147	51.0587	413.411	421.433	452.852	31.86	0.0364467	2308.04	323.096	429.232	-106.136
Sugar phosphatase YidA	5	16	9	56	40	55	1	11	147.319	195.274	146.213	7.29411	335.522	200.682	270.727	19.47	0.0328454	1303.03	162.935	268.977	-106.042
RNA polymerase sigma factor SigA	13	29	25	71	122	86	3	14	383.029	353.935	406.147	21.8823	425.394	612.081	423.318	24.78	0.0876625	2625.79	381.037	486.931	-105.894
Single-stranded DNA-binding protein	14	32	24	68	106	116	5	23	412.493	390.549	389.902	36.4705	407.42	531.808	570.987	40.71	0.0506167	2739.63	397.648	503.405	-105.757
putative GTP-binding protein EngB	12	21	20	58	85	97	6	16	353.565	256.298	324.918	43.7646	347.505	426.45	477.463	28.32	0.0453442	2229.96	311.594	417.139	-105.546
Orotidine 5'-phosphate decarboxylase	11	26	16	69	73	89	5	21	324.101	317.321	259.934	36.4705	413.411	366.245	438.085	37.17	0.0113832	2155.57	300.452	405.914	-105.462
3-octaprenyl-4-hydroxybenzoate carboxy-lyase	6	12	6	32	25	85	3	18	176.783	146.456	97.4754	21.8823	191.727	125.426	418.396	31.86	0.158033	1178.15	140.238	245.183	-104.945
Adenosylhomocysteinase		7	2	15	29	40		5	0	85.4325	32.4918	0	89.872	145.495	196.892	8.85	0.0287798	550.183	39.3081	144.086	-104.778
Dipeptidyl aminopeptidase 4		3		22	16	28		5	0	36.6139	0	0	131.812	80.2729	137.824	8.85	0.00447207	386.524	12.2046	116.637	-104.432
Glutaconyl-CoA decarboxylase subunit beta	5	21	11	40	60	72	1	12	147.319	256.298	178.705	7.29411	239.659	301.023	354.406	21.24	0.0438482	1484.7	194.107	298.363	-104.256
Nitrogen fixation protein VnfA	2	3	2	24	9	51	1	3	58.9275	36.6139	32.4918	7.29411	143.795	45.1535	251.037	5.31	0.0790975	575.313	42.6778	146.662	-103.984
ECF RNA polymerase sigma-E factor	7	12	9	39	48	68	4	10	206.246	146.456	146.213	29.1764	233.667	240.819	334.717	17.7	0.0268239	1337.29	166.305	269.734	-103.429
DNA translocase SpoIIIE	2	19	15	33	68	62	1	13	58.9275	231.888	243.688	7.29411	197.718	341.16	305.183	23.01	0.11688	1385.86	178.168	281.354	-103.186
UDP-N-acetylenolpyruvoylglucosamine reductase	15	24	26	75	88	117	5	25	441.956	292.912	422.393	36.4705	449.36	441.501	575.909	44.25	0.0908625	2660.5	385.754	488.923	-103.17
Kappa-carrageenase		11	2	33	23	33		3	0	134.251	32.4918	0	197.718	115.392	162.436	5.31	0.0467078	642.29	55.581	158.516	-102.935
NADP-dependent malic enzyme	5	12	7	31	39	68	3	11	147.319	146.456	113.721	21.8823	185.736	195.665	334.717	19.47	0.0527274	1145.5	135.832	238.706	-102.874
Non-reducing end beta-L-arabinofuranosidase		8	6	35	35	24		4	0	97.6372	97.4754	0	209.701	175.597	118.135	7.08	0.0355302	698.546	65.0375	167.811	-102.774
Alpha-amylase 2	2	7	1	17	23	51		5	58.9275	85.4325	16.2459	0	101.855	115.392	251.037	8.85	0.0591988	628.891	53.5353	156.095	-102.56
Aspartate aminotransferase	12	36	32	84	101	124	4	26	353.565	439.367	519.869	29.1764	503.283	506.723	610.365	46.02	0.0799796	2962.35	437.6	540.124	-102.523
Ribosomal silencing factor RsfS	11	21	19	62	80	86	5	13	324.101	256.298	308.672	36.4705	371.471	401.365	423.318	23.01	0.00790019	2121.7	296.357	398.718	-102.361
Nitrogenase molybdenum-iron protein beta chain		2	1	16	4	47		4	0	24.4093	16.2459	0	95.8635	20.0682	231.348	7.08	0.0878747	387.935	13.5517	115.76	-102.208
DNA polymerase III subunit beta					61		3		0	0	0	21.8823	0	306.041	0	0	0.18695	327.923	0	102.014	-102.014
Sporulation kinase D		11		22	22	40		6	0	134.251	0	0	131.812	110.375	196.892	10.62	0.0605667	573.331	44.7504	146.36	-101.61
DNA mismatch repair protein MutL	11	32	30	79	97	111	6	22	324.101	390.549	487.377	43.7646	473.326	486.655	546.375	38.94	0.0626298	2752.15	400.676	502.119	-101.443
Xaa-Pro aminopeptidase	2	11	14	30	25	85	1	15	58.9275	134.251	227.443	7.29411	179.744	125.426	418.396	26.55	0.189801	1151.48	140.207	241.189	-100.982
Putative lipoprotein YerB		2		33	7	19		5	0	24.4093	0	0	197.718	35.1194	93.5237	8.85	0.0526403	350.771	8.13643	108.787	-100.651
Rhomboid protease GluP	3	10	2	24	25	56		6	88.3913	122.046	32.4918	0	143.795	125.426	275.649	10.62	0.0680085	787.8	80.9765	181.624	-100.647
Dipeptidase A		6	1	17	22	36		2	0	73.2279	16.2459	0	101.855	110.375	177.203	3.54	0.0186404	478.907	29.8246	129.811	-99.9864
Replication-associated recombination protein A	8	12	8	36	59	61	2	14	235.71	146.456	129.967	14.5882	215.693	296.006	300.26	24.78	0.0400058	1338.68	170.711	270.653	-99.9422
3-isopropylmalate dehydratase small subunit 1	4	8	4	29	22	60	3	9	117.855	97.6372	64.9836	21.8823	173.753	110.375	295.338	15.93	0.076011	881.824	93.4919	193.155	-99.6634
3-[(3aS%2C4S%2C7aS)-7a-methyl-1%2C5-dioxo-octahydro-1H-inden-4-yl]propanoyl:CoA ligase		10	2	17	22	49		9	0	122.046	32.4918	0	101.855	110.375	241.193	15.93	0.0805154	607.961	51.5128	151.141	-99.6282
ATP-dependent helicase/nuclease subunit A	10	18	25	60	78	95	4	19	294.638	219.684	406.147	29.1764	359.488	391.331	467.619	33.63	0.094897	2168.08	306.823	406.146	-99.3229
Transketolase	11	18	18	40	88	92	1	15	324.101	219.684	292.426	7.29411	239.659	441.501	452.852	26.55	0.130338	1977.52	278.737	378.004	-99.2668
Epoxyqueuosine reductase	8	23	9	46	55	83	2	21	235.71	280.707	146.213	14.5882	275.608	275.938	408.551	37.17	0.0850247	1637.32	220.877	320.032	-99.1556
tRNA modification GTPase MnmE	14	35	30	76	122	113	7	18	412.493	427.163	487.377	51.0587	455.352	612.081	556.22	31.86	0.0630064	3001.74	442.344	541.218	-98.8735
Acetylornithine aminotransferase	5	14	15	48	49	66		11	147.319	170.865	243.688	0	287.59	245.836	324.872	19.47	0.0277042	1420.17	187.291	286.099	-98.8086
Diaminopimelate decarboxylase	10	25	16	57	75	89	5	16	294.638	305.116	259.934	36.4705	341.514	376.279	438.085	28.32	0.0172974	2052.04	286.563	385.293	-98.7299
D-ribitol-5-phosphate phosphatase		10	3	23	30	36		9	0	122.046	48.7377	0	137.804	150.512	177.203	15.93	0.0290188	636.303	56.9281	155.173	-98.2447
Protein flp		5	1	20	1	50		9	0	61.0232	16.2459	0	119.829	5.01706	246.115	15.93	0.122698	448.231	25.7564	123.654	-97.8975
Reverse rubrerythrin-1		10	6	25	43	30	1	6	0	122.046	97.4754	7.29411	149.787	215.733	147.669	10.62	0.0436886	740.005	73.174	171.063	-97.8891
Putative defective protein IntQ				25	6	23		3	0	0	0	0	149.787	30.1023	113.213	5.31	0.0254472	293.102	0	97.7007	-97.7007
Non-reducing end alpha-L-arabinofuranosidase BoGH43B		4		14	19	33		9	0	48.8186	0	0	83.8806	95.3241	162.436	15.93	0.01471	390.459	16.2729	113.88	-97.6073
ATP-dependent DNA helicase UvrD2		13		15	24	49		8	0	158.66	0	0	89.872	120.409	241.193	14.16	0.118456	610.135	52.8868	150.491	-97.6046
GTPase HflX	14	20	25	62	93	105	8	17	412.493	244.093	406.147	58.3528	371.471	466.586	516.842	30.09	0.117342	2475.98	354.244	451.633	-97.3887
Cellobiose 2-epimerase	3	14	5	38	49	32		4	88.3913	170.865	81.2295	0	227.676	245.836	157.514	7.08	0.0349172	971.511	113.495	210.342	-96.8465
putative methylmalonyl-CoA mutase small subunit		8	2	18	17	46		6	0	97.6372	32.4918	0	107.846	85.29	226.426	10.62	0.0695505	549.691	43.3763	139.854	-96.4778
4-hydroxy-tetrahydrodipicolinate reductase	9	26	24	63	80	98	3	18	265.174	317.321	389.902	21.8823	377.462	401.365	482.386	31.86	0.0580286	2255.49	324.132	420.404	-96.2722
Cobyric acid synthase	2	6	8	39	14	50	1	2	58.9275	73.2279	129.967	7.29411	233.667	70.2388	246.115	3.54	0.0944464	819.438	87.3742	183.34	-95.9662
Cell surface protein		1	3	26	11	28		1	0	12.2046	48.7377	0	155.778	55.1876	137.824	1.77	0.0243922	409.733	20.3141	116.263	-95.9493
tRNA-Arg(ccg)	8	13	14	39	64	72	3	12	235.71	158.66	227.443	21.8823	233.667	321.092	354.406	21.24	0.0462371	1552.86	207.271	303.055	-95.7839
Multidrug resistance protein MdtK	3	6	7	31	29	47	3	2	88.3913	73.2279	113.721	21.8823	185.736	145.495	231.348	3.54	0.0126118	859.801	91.7801	187.526	-95.746
8-amino-3%2C8-dideoxy-manno-octulosonate cytidylyltransferase		7	1	18	5	52		7	0	85.4325	16.2459	0	107.846	25.0853	255.96	12.39	0.128391	490.57	33.8928	129.63	-95.7377
putative transcriptional regulatory protein	8	10	15	48	52	69	3	14	235.71	122.046	243.688	21.8823	287.59	260.887	339.639	24.78	0.052047	1511.44	200.482	296.039	-95.5571
Arsenate reductase	1	12	6	38	21	46	2	7	29.4638	146.456	97.4754	14.5882	227.676	105.358	226.426	12.39	0.0728431	847.443	91.1316	186.487	-95.355
V-type ATP synthase subunit D	3	15	7	29	45	55	1	13	88.3913	183.07	113.721	7.29411	173.753	225.768	270.727	23.01	0.0377436	1062.72	128.394	223.416	-95.0215
Glutamate decarboxylase	2	16	12	35	23	83	1	15	58.9275	195.274	194.951	7.29411	209.701	115.392	408.551	26.55	0.193132	1190.09	149.718	244.548	-94.8307
1%2C3-propanediol dehydrogenase	4	12	5	43	33	42		6	117.855	146.456	81.2295	0	257.633	165.563	206.737	10.62	0.0219632	975.473	115.18	209.978	-94.7975
putative UbiX-like flavin prenyltransferase		2		16	4	39		2	0	24.4093	0	0	95.8635	20.0682	191.97	3.54	0.0670312	332.311	8.13643	102.634	-94.4974
Glucan 1%2C4-alpha-glucosidase SusB		18	3	15	43	50		5	0	219.684	48.7377	0	89.872	215.733	246.115	8.85	0.156816	820.142	89.4738	183.907	-94.4331
Transposase from transposon Tn916		5	6	23	39	22		8	0	61.0232	97.4754	0	137.804	195.665	108.291	14.16	0.0346542	600.258	52.8329	147.253	-94.4203
Putative phosphoserine phosphatase 2	2	3	1	28	6	40		3	58.9275	36.6139	16.2459	0	167.761	30.1023	196.892	5.31	0.0745476	506.543	37.2625	131.585	-94.3227
3-hydroxybenzoate synthase		8		19	10	44		7	0	97.6372	0	0	113.838	50.1706	216.581	12.39	0.0907729	478.227	32.5457	126.863	-94.3175
3-oxoacyl-[acyl-carrier-protein] reductase FabG	32	46	53	163	179	157	11	30	942.84	561.414	861.033	80.2352	976.609	898.053	772.801	53.1	0.255076	5092.99	788.429	882.488	-94.0591
Outer membrane protein assembly factor BamD	12	26	20	50	90	107	6	19	353.565	317.321	324.918	43.7646	299.573	451.535	526.686	33.63	0.118677	2317.36	331.935	425.932	-93.997
putative GTPase		13	2	16	32	44		8	0	158.66	32.4918	0	95.8635	160.546	216.581	14.16	0.09519	664.143	63.7174	157.664	-93.9461
NADP-reducing hydrogenase subunit HndB		2		17	26	15		4	0	24.4093	0	0	101.855	130.444	73.8345	7.08	0.00338596	330.542	8.13643	102.044	-93.9079
Tyrosine recombinase XerC	32	68	60	198	170	201	6	59	942.84	829.916	974.754	43.7646	1186.31	852.9	989.383	104.43	0.213897	5819.87	915.837	1009.53	-93.6943
putative MFS-type transporter YhhS		5	1	17	5	47		7	0	61.0232	16.2459	0	101.855	25.0853	231.348	12.39	0.10531	435.558	25.7564	119.429	-93.6731
putative symporter YjmB	2	3	2	20	35	23	2	21	58.9275	36.6139	32.4918	14.5882	119.829	175.597	113.213	37.17	0.00600014	551.261	42.6778	136.213	-93.5354
3-oxoacyl-[acyl-carrier-protein] synthase 3	7	27	33	64	91	104	2	11	206.246	329.525	536.115	14.5882	383.454	456.552	511.919	19.47	0.208379	2438.4	357.295	450.642	-93.3464
Bifunctional protein FolD protein	15	36	26	80	123	99	4	27	441.956	439.367	422.393	29.1764	479.317	617.098	487.308	47.79	0.0535723	2916.62	434.572	527.908	-93.3355
Mannose-1-phosphate guanylyltransferase RfbM		5	2	16	21	35		7	0	61.0232	32.4918	0	95.8635	105.358	172.281	12.39	0.0175898	467.017	31.1717	124.501	-93.3291
Aspartate carbamoyltransferase catalytic subunit	2	13	7	26	25	67	1	4	58.9275	158.66	113.721	7.29411	155.778	125.426	329.794	7.08	0.126568	949.602	110.436	203.666	-93.2299
Phosphorylated carbohydrates phosphatase	7	19	1	47	41	50	4	10	206.246	231.888	16.2459	29.1764	281.599	205.699	246.115	17.7	0.131475	1216.97	151.46	244.471	-93.011
Pyruvate formate-lyase 1-activating enzyme	8	17	15	55	65	63	4	16	235.71	207.479	243.688	29.1764	329.531	326.109	310.105	28.32	0.00087566	1681.8	228.959	321.915	-92.9557
tRNA-Leu(tag)	3	26	22	55	89	54	1	22	88.3913	317.321	357.41	7.29411	329.531	446.518	265.804	38.94	0.20079	1812.27	254.374	347.284	-92.9104
Neutral endopeptidase		6		14	22	32	2	4	0	73.2279	0	14.5882	83.8806	110.375	157.514	7.08	0.0231396	439.586	24.4093	117.256	-92.8472
PEP-dependent dihydroxyacetone kinase 2%2C ADP-binding subunit DhaL		4	2	28	1	38		4	0	48.8186	32.4918	0	167.761	5.01706	187.047	7.08	0.0968151	441.136	27.1035	119.942	-92.8384
Cation efflux system protein CusC		5	1	14	6	49		9	0	61.0232	16.2459	0	83.8806	30.1023	241.193	15.93	0.11629	432.445	25.7564	118.392	-92.6355
Glutaconyl-CoA decarboxylase subunit gamma	2	14	10	27	61	41	1	10	58.9275	170.865	162.459	7.29411	161.77	306.041	201.814	17.7	0.087266	1069.17	130.751	223.208	-92.4577
Ktr system potassium uptake protein B	9	16	16	58	57	74	2	11	265.174	195.274	259.934	14.5882	347.505	285.972	364.25	19.47	0.0238136	1732.7	240.128	332.576	-92.4484
Diacylglycerol kinase	7	15	10	53	41	62	1	9	206.246	183.07	162.459	7.29411	317.548	205.699	305.183	15.93	0.0351082	1387.5	183.925	276.143	-92.2183
S-adenosylmethionine synthase	15	35	22	74	115	98	7	33	441.956	427.163	357.41	51.0587	443.369	576.962	482.386	58.41	0.0622079	2780.3	408.843	500.905	-92.0623
GDP-mannose 4%2C6-dehydratase		16	5	26	33	47	1	15	0	195.274	81.2295	7.29411	155.778	165.563	231.348	26.55	0.104092	836.487	92.168	184.23	-92.0618
Lipopolysaccharide export system ATP-binding protein LptB	15	25	31	85	90	115	6	21	441.956	305.116	503.623	43.7646	509.275	451.535	566.065	37.17	0.121675	2821.33	416.898	508.958	-92.0598
Cys-tRNA(Pro)/Cys-tRNA(Cys) deacylase YbaK	5	13		40	30	39	3	1	147.319	158.66	0	21.8823	239.659	150.512	191.97	1.77	0.0914905	910.002	101.993	194.047	-92.0537
Beta-phosphoglucomutase	3	8	1	22	21	49	2	5	88.3913	97.6372	16.2459	14.5882	131.812	105.358	241.193	8.85	0.0664671	695.226	67.4248	159.454	-92.0296
Signal recognition particle receptor FtsY	12	28	26	67	79	121	4	25	353.565	341.73	422.393	29.1764	401.428	396.348	595.598	44.25	0.130449	2540.24	372.563	464.458	-91.8953
Riboflavin biosynthesis protein RibF	13	27	23	73	88	98	3	17	383.029	329.525	373.656	21.8823	437.377	441.501	482.386	30.09	0.00689465	2469.36	362.07	453.755	-91.6846
tRNA uridine 5-carboxymethylaminomethyl modification enzyme MnmG	15	35	35	82	110	136	6	27	441.956	427.163	568.606	43.7646	491.3	551.876	669.433	47.79	0.127205	3194.1	479.242	570.87	-91.6281
Chaperone protein Skp	4	8	3	28	19	56	2	10	117.855	97.6372	48.7377	14.5882	167.761	95.3241	275.649	17.7	0.0896074	817.552	88.0766	179.578	-91.5014
Efflux pump periplasmic linker BepF	12	8	4	48	52	49	3	13	353.565	97.6372	64.9836	21.8823	287.59	260.887	241.193	23.01	0.18944	1327.74	172.062	263.223	-91.1615
Deoxyguanosinetriphosphate triphosphohydrolase		2		13	27	17		1	0	24.4093	0	0	77.8891	135.461	83.6791	1.77	0.0052603	321.438	8.13643	99.0096	-90.8732
GMP synthase [glutamine-hydrolyzing]	10	24	22	54	84	96	6	20	294.638	292.912	357.41	43.7646	323.539	421.433	472.541	35.4	0.0674385	2206.24	314.986	405.838	-90.8514
Heat shock protein 15	5	14	7	29	41	66	5	11	147.319	170.865	113.721	36.4705	173.753	205.699	324.872	19.47	0.0683821	1172.7	143.968	234.775	-90.8062
Lipoprotein signal peptidase	14	25	28	67	98	112	5	23	412.493	305.116	454.885	36.4705	401.428	491.672	551.298	40.71	0.109779	2653.36	390.831	481.466	-90.6346
Phosphoserine phosphatase RsbU	1	1	14	38	30	33		9	29.4638	12.2046	227.443	0	227.676	150.512	162.436	15.93	0.14168	809.734	89.7037	180.208	-90.5042
Cobalt-precorrin-4 C(11)-methyltransferase			7	23	9	41		2	0	0	113.721	0	137.804	45.1535	201.814	3.54	0.100841	498.493	37.9071	128.257	-90.3501
Arabinose 5-phosphate isomerase KpsF	2	4	2	20	9	50		5	58.9275	48.8186	32.4918	0	119.829	45.1535	246.115	8.85	0.100808	551.336	46.746	137.033	-90.2867
Outer membrane efflux protein BepC	5	13	2	38	27	50	3	7	147.319	158.66	32.4918	21.8823	227.676	135.461	246.115	12.39	0.0814964	969.605	112.824	203.084	-90.2601
Serine/threonine-protein kinase PrkC	12	15	14	68	76	50	13	48	353.565	183.07	227.443	94.8234	407.42	381.296	246.115	84.96	0.137607	1893.73	254.692	344.944	-90.2513
Thioredoxin	5	19	18	51	65	63	1	15	147.319	231.888	292.426	7.29411	305.565	326.109	310.105	26.55	0.0508506	1620.71	223.878	313.926	-90.0485
Glycine dehydrogenase (decarboxylating)	2	10	1	19	39	32	2	8	58.9275	122.046	16.2459	14.5882	113.838	195.665	157.514	14.16	0.0405889	678.825	65.74	155.672	-89.9323
Na(+)-translocating NADH-quinone reductase subunit B	6	11	7	33	45	55	4	15	176.783	134.251	113.721	29.1764	197.718	225.768	270.727	26.55	0.0167415	1148.14	141.585	231.404	-89.8192
Undecaprenyl-diphosphatase	13	30	26	78	77	119	5	18	383.029	366.139	422.393	36.4705	467.335	386.313	585.754	31.86	0.106289	2647.43	390.521	479.801	-89.2801
Cell shape-determining protein MreC	14	17	20	59	79	94	2	18	412.493	207.479	324.918	14.5882	353.497	396.348	462.696	31.86	0.127953	2172.02	314.963	404.18	-89.217
putative FKBP-type peptidyl-prolyl cis-trans isomerase		9	1	16	16	44		7	0	109.842	16.2459	0	95.8635	80.2729	216.581	12.39	0.0907617	518.805	42.0292	130.906	-88.8767
Thymidylate synthase ThyX		4	1	6	56	3	1	3	0	48.8186	16.2459	7.29411	35.9488	280.955	14.7669	5.31	0.181439	404.03	21.6882	110.557	-88.8688
Histidinol-phosphatase	2	20	13	38	69	42		5	58.9275	244.093	211.197	0	227.676	346.177	206.737	8.85	0.141582	1294.81	171.406	260.196	-88.7908
Oxygen sensor histidine kinase NreB	2	6		17	13	47	1	5	58.9275	73.2279	0	7.29411	101.855	65.2218	231.348	8.85	0.0914113	537.874	44.0518	132.808	-88.7565
Phosphatidylserine decarboxylase proenzyme	6	19	10	33	48	81	4	10	176.783	231.888	162.459	29.1764	197.718	240.819	398.706	17.7	0.120993	1437.55	190.377	279.081	-88.7046
Ktr system potassium uptake protein A	8	16	19	61	56	73	2	7	235.71	195.274	308.672	14.5882	365.48	280.955	359.328	12.39	0.053786	1760.01	246.552	335.254	-88.7021
D-alanine--D-alanine ligase	5	13	15	40	51	65		21	147.319	158.66	243.688	0	239.659	255.87	319.95	37.17	0.0429376	1365.15	183.223	271.826	-88.6035
Sirohydrochlorin cobaltochelatase		4	2	24	7	34	1	4	0	48.8186	32.4918	7.29411	143.795	35.1194	167.358	7.08	0.0551262	434.877	27.1035	115.424	-88.3208
Beta-agarase		3		9	13	37		1	0	36.6139	0	0	53.9232	65.2218	182.125	1.77	0.0540341	337.884	12.2046	100.423	-88.2187
tRNA threonylcarbamoyladenosine biosynthesis protein TsaB	13	27	23	67	95	96	7	14	383.029	329.525	373.656	51.0587	401.428	476.621	472.541	24.78	0.0201477	2487.86	362.07	450.197	-88.1266
D-alanyl-D-alanine carboxypeptidase	2	6	3	37	18	27	1	4	58.9275	73.2279	48.7377	7.29411	221.684	90.307	132.902	7.08	0.0444774	633.081	60.2977	148.298	-88.0001
Ferredoxin%2C 2Fe-2S		2	1	13	2	44		3	0	24.4093	16.2459	0	77.8891	10.0341	216.581	5.31	0.112043	345.16	13.5517	101.501	-87.9498
2%2C5-diamino-6-ribosylamino-4(3H)-pyrimidinone 5'-phosphate reductase		1		13	7	33		5	0	12.2046	0	0	77.8891	35.1194	162.436	8.85	0.0400389	287.649	4.06822	91.8148	-87.7466
Hydroxymethylpyrimidine/phosphomethylpyrimidine kinase	8	22	10	41	47	91	2	10	235.71	268.502	162.459	14.5882	245.65	235.802	447.929	17.7	0.156427	1610.64	222.224	309.794	-87.57
putative HTH-type transcriptional regulator YgaV		6		13	18	34	1	6	0	73.2279	0	7.29411	77.8891	90.307	167.358	10.62	0.0390529	416.076	24.4093	111.851	-87.4422
Protein UmuC	2	16	3	25	18	66		6	58.9275	195.274	48.7377	0	149.787	90.307	324.872	10.62	0.180564	867.905	100.98	188.322	-87.342
GTP pyrophosphokinase YwaC	1	4	6	39	23	18	1	6	29.4638	48.8186	97.4754	7.29411	233.667	115.392	88.6014	10.62	0.0745193	620.713	58.5859	145.887	-87.3011
Carbamoyl-phosphate synthase large chain	9	30	21	55	91	91	9	26	265.174	366.139	341.164	65.647	329.531	456.552	447.929	46.02	0.0812816	2272.14	324.159	411.337	-87.1784
Shikimate dehydrogenase (NADP(+))	7	22	26	54	80	88	6	14	206.246	268.502	422.393	43.7646	323.539	401.365	433.163	24.78	0.146851	2098.97	299.047	386.022	-86.9748
Putative ribosome biogenesis GTPase RsgA					52		4	1	0	0	0	29.1764	0	260.887	0	1.77	0.18695	290.063	0	86.9623	-86.9623
Ferrous iron transport protein B					52		1		0	0	0	7.29411	0	260.887	0	0	0.18695	268.181	0	86.9623	-86.9623
Outer membrane lipoprotein Blc	4	11	3	30	26	51		11	117.855	134.251	48.7377	0	179.744	130.444	251.037	19.47	0.0590646	862.069	100.281	187.075	-86.7937
Phenylalanine--tRNA ligase beta subunit	14	28	28	62	100	121	4	26	412.493	341.73	454.885	29.1764	371.471	501.706	595.598	46.02	0.150351	2707.06	403.036	489.592	-86.5558
Nicotinate-nucleotide pyrophosphorylase [carboxylating]	4	13	6	33	28	60	3	11	117.855	158.66	97.4754	21.8823	197.718	140.478	295.338	19.47	0.0750069	1029.41	124.664	211.178	-86.5144
UDP-Glc:alpha-D-GlcNAc-diphosphoundecaprenol beta-1%2C3-glucosyltransferase WfgD		2	2	22	23	14		3	0	24.4093	32.4918	0	131.812	115.392	68.9122	5.31	0.00759676	373.018	18.967	105.372	-86.4053
Adenosylcobinamide-GDP ribazoletransferase	2	5	5	29	11	47		3	58.9275	61.0232	81.2295	0	173.753	55.1876	231.348	5.31	0.0871394	661.469	67.0601	153.429	-86.3694
RNA-binding riboflavin kinase RibR		6		11	4	50		6	0	73.2279	0	0	65.9061	20.0682	246.115	10.62	0.151853	405.317	24.4093	110.696	-86.2872
Cyclohexadienyl dehydrogenase	5	14	15	57	18	79		16	147.319	170.865	243.688	0	341.514	90.307	388.862	28.32	0.212192	1382.55	187.291	273.561	-86.2701
Lysine-sensitive aspartokinase 3	2	12	2	19	34	43	2	8	58.9275	146.456	32.4918	14.5882	113.838	170.58	211.659	14.16	0.0629623	748.54	79.2917	165.359	-86.0672
23S rRNA pseudouridine(2604) synthase	3	19	6	30	40	60	2	11	88.3913	231.888	97.4754	14.5882	179.744	200.682	295.338	19.47	0.107584	1108.11	139.252	225.255	-86.0032
Guanine deaminase	3	9	2	31	28	33		5	88.3913	109.842	32.4918	0	185.736	140.478	162.436	8.85	0.0157736	719.374	76.9083	162.883	-85.9747
Sec-independent protein translocase protein TatC	5	7	6	37	22	52	4	6	147.319	85.4325	97.4754	29.1764	221.684	110.375	255.96	10.62	0.0734843	947.422	110.076	196.006	-85.9309
Alkaline phosphatase PafA		7	1	16	27	26	1	4	0	85.4325	16.2459	7.29411	95.8635	135.461	127.98	7.08	0.0204841	468.276	33.8928	119.768	-85.8752
GDP-L-fucose synthase	1	15	12	29	40	59	2	15	29.4638	183.07	194.951	14.5882	173.753	200.682	290.416	26.55	0.125289	1086.92	135.828	221.617	-85.7888
Lipoprotein-releasing system transmembrane protein LolC	5	8	8	22	33	68	3	5	147.319	97.6372	129.967	21.8823	131.812	165.563	334.717	8.85	0.127091	1028.9	124.974	210.697	-85.7229
HTH-type transcriptional regulator CysL	12	17	3	61	40	61	3	12	353.565	207.479	48.7377	21.8823	365.48	200.682	300.26	21.24	0.220714	1498.09	203.261	288.807	-85.5468
Nitrogen regulatory protein P-II	6	27	10	54	64	57	5	16	176.783	329.525	162.459	36.4705	323.539	321.092	280.571	28.32	0.0983625	1630.44	222.922	308.401	-85.4784
Guanylate kinase	16	55	23	85	138	116	6	29	471.42	671.256	373.656	43.7646	509.275	692.354	570.987	51.33	0.226287	3332.71	505.444	590.872	-85.4281
Nicotinate-nucleotide--dimethylbenzimidazole phosphoribosyltransferase	2	7	7	33	12	52		1	58.9275	85.4325	113.721	0	197.718	60.2047	255.96	1.77	0.114647	771.964	86.0271	171.294	-85.2672
Modification methylase VspI		2	1	9	5	44		9	0	24.4093	16.2459	0	53.9232	25.0853	216.581	15.93	0.114944	336.245	13.5517	98.5299	-84.9782
Alkaline phosphatase 4	2	19	5	30	42	48	1	10	58.9275	231.888	81.2295	7.29411	179.744	210.716	236.27	17.7	0.104416	1006.07	124.015	208.91	-84.8952
Riboflavin transporter RibZ		4		12		47		6	0	48.8186	0	0	71.8976	0	231.348	10.62	0.146981	352.064	16.2729	101.082	-84.8091
Putative aliphatic sulfonates transport permease protein SsuC	5	10	2	37	42	25	3	4	147.319	122.046	32.4918	21.8823	221.684	210.716	123.058	7.08	0.072493	879.198	100.619	185.153	-84.5337
DNA repair protein RadA	11	26	16	61	72	87	3	13	324.101	317.321	259.934	21.8823	365.48	361.228	428.24	23.01	0.0233446	2078.19	300.452	384.983	-84.5305
Dipeptidyl-peptidase 7		14		12	32	39		4	0	170.865	0	0	71.8976	160.546	191.97	7.08	0.138926	595.278	56.955	141.471	-84.5161
Trk system potassium uptake protein TrkH	4	17	18	36	57	75	3	6	117.855	207.479	292.426	21.8823	215.693	285.972	369.173	10.62	0.138662	1510.48	205.92	290.279	-84.3592
Toluene efflux pump periplasmic linker protein TtgD	5	9	3	28	6	73		8	147.319	109.842	48.7377	0	167.761	30.1023	359.328	14.16	0.224035	863.09	101.966	185.73	-83.7644
Rod shape-determining protein RodA					50		2		0	0	0	14.5882	0	250.853	0	0	0.18695	265.441	0	83.6176	-83.6176
3-isopropylmalate dehydratase large subunit	6	16	10	45	33	71	2	9	176.783	195.274	162.459	14.5882	269.616	165.563	349.483	15.93	0.0990092	1333.77	178.172	261.554	-83.3822
Small-conductance mechanosensitive channel	20	23	23	88	70	125	5	27	589.275	280.707	373.656	36.4705	527.249	351.194	615.288	47.79	0.262604	2773.84	414.546	497.91	-83.3644
Transcription elongation factor GreA	16	28	20	74	100	90	5	17	471.42	341.73	324.918	36.4705	443.369	501.706	443.007	30.09	0.0862129	2562.62	379.356	462.694	-83.3378
Prolyl-tRNA editing protein ProX				21	11	14		4	0	0	0	0	125.821	55.1876	68.9122	7.08	0.00913031	249.921	0	83.3069	-83.3069
Protein translocase subunit SecDF	3	15	7	39	20	61		11	88.3913	183.07	113.721	0	233.667	100.341	300.26	19.47	0.136013	1019.45	128.394	211.423	-83.0288
Putative acetolactate synthase small subunit	2	7	2	19	21	42		8	58.9275	85.4325	32.4918	0	113.838	105.358	206.737	14.16	0.0408602	602.785	58.9506	141.978	-83.027
Glycerol-3-phosphate acyltransferase	10	19	18	63	60	79	6	17	294.638	231.888	292.426	43.7646	377.462	301.023	388.862	30.09	0.0368888	1930.06	272.984	355.783	-82.7986
Glutaminase 1	4	5	5	22	21	55	4	4	117.855	61.0232	81.2295	29.1764	131.812	105.358	270.727	7.08	0.100146	797.181	86.7026	169.299	-82.5964
Cysteine synthase	4	10	11	34	46	47	1	9	117.855	122.046	178.705	7.29411	203.71	230.785	231.348	15.93	0.00948089	1091.74	139.535	221.948	-82.4121
Hexuronate transporter		8	1	19	12	38	1	3	0	97.6372	16.2459	7.29411	113.838	60.2047	187.047	5.31	0.0791628	482.267	37.961	120.363	-82.4023
Lambda-carrageenase		14		14	42	25			0	170.865	0	0	83.8806	210.716	123.058	0	0.147068	588.52	56.955	139.218	-82.2632
Alpha-galactosidase A		4		16	25	15	1	6	0	48.8186	0	7.29411	95.8635	125.426	73.8345	10.62	0.0102744	351.237	16.2729	98.3748	-82.102
Sialidase		5		19	7	32		5	0	61.0232	0	0	113.838	35.1194	157.514	8.85	0.0589588	367.494	20.3411	102.157	-81.8159
Protein LemA	2	4	2	23	14	36		3	58.9275	48.8186	32.4918	0	137.804	70.2388	177.203	5.31	0.0320305	525.483	46.746	128.415	-81.6692
ATP-dependent DNA helicase PcrA	12	30	40	82	114	112	1	16	353.565	366.139	649.836	7.29411	491.3	571.945	551.298	28.32	0.229369	2991.38	456.513	538.181	-81.6674
Thymidylate kinase	11	22	31	78	77	99	5	20	324.101	268.502	503.623	36.4705	467.335	386.313	487.308	35.4	0.175608	2473.65	365.409	446.985	-81.5765
SsrA-binding protein	11	28	21	53	91	97	4	20	324.101	341.73	341.164	29.1764	317.548	456.552	477.463	35.4	0.0909369	2287.74	335.665	417.188	-81.5227
Ferredoxin--NADP reductase	3	6	6	30	34	31	5	4	88.3913	73.2279	97.4754	36.4705	179.744	170.58	152.591	7.08	0.000794384	798.48	86.3649	167.638	-81.2736
Na(+)-translocating NADH-quinone reductase subunit A	4	13	5	25	40	51	4	14	117.855	158.66	81.2295	29.1764	149.787	200.682	251.037	24.78	0.045924	988.428	119.248	200.502	-81.2538
ATP-dependent zinc metalloprotease FtsH	16	31	31	93	117	92	12	40	471.42	378.344	503.623	87.5293	557.207	586.996	452.852	70.8	0.108118	3037.97	451.129	532.351	-81.2223
Spermidine N(1)-acetyltransferase	2	10	4	17	38	40	1	7	58.9275	122.046	64.9836	7.29411	101.855	190.648	196.892	12.39	0.0457314	742.647	81.9859	163.132	-81.1459
Outer membrane protein TolC	9	16	7	47	45	63	7	14	265.174	195.274	113.721	51.0587	281.599	225.768	310.105	24.78	0.0910448	1442.7	191.39	272.491	-81.1007
Glucosamine-6-phosphate deaminase 1	3	8	10	39	34	38	1	12	88.3913	97.6372	162.459	7.29411	233.667	170.58	187.047	21.24	0.0271025	947.076	116.162	197.098	-80.9357
Sensor histidine kinase ResE	4	20	21	70	50	56		6	117.855	244.093	341.164	0	419.403	250.853	275.649	10.62	0.193155	1649.02	234.371	315.302	-80.9309
NAD-dependent dihydropyrimidine dehydrogenase subunit PreA		7	1	11	25	31		4	0	85.4325	16.2459	0	65.9061	125.426	152.591	7.08	0.0460808	445.602	33.8928	114.641	-80.7485
N-acetylgalactosamine-N%2CN'-diacetylbacillosaminyl-diphospho-undecaprenol 4-alpha-N-acetylgalactosaminyltransferase	2	10	1	18	19	48	1	5	58.9275	122.046	16.2459	7.29411	107.846	95.3241	236.27	8.85	0.10639	643.955	65.74	146.48	-80.7404
Inner membrane protein YbjJ		2	2	11	11	36		6	0	24.4093	32.4918	0	65.9061	55.1876	177.203	10.62	0.0579911	355.198	18.967	99.4322	-80.4652
ICEBs1 excisionase	1		6	35	8	24		3	29.4638	0	97.4754	0	209.701	40.1365	118.135	5.31	0.115295	494.912	42.313	122.658	-80.3446
Periplasmic beta-glucosidase					48				0	0	0	0	0	240.819	0	0	0.18695	240.819	0	80.2729	-80.2729
Energy-coupling factor transporter ATP-binding protein EcfA1	3	14	15	40	62	39	2	9	88.3913	170.865	243.688	14.5882	239.659	311.058	191.97	15.93	0.115602	1260.22	167.648	247.562	-79.9138
Lipid A biosynthesis lauroyltransferase	11	17	7	41	45	84	4	13	324.101	207.479	113.721	29.1764	245.65	225.768	413.473	23.01	0.200642	1559.37	215.101	294.964	-79.8632
Glucosamine-6-phosphate deaminase	8	10	3	48	39	33	3	12	235.71	122.046	48.7377	21.8823	287.59	195.665	162.436	21.24	0.146862	1074.07	135.498	215.231	-79.7325
Alpha-D-glucose 1-phosphate phosphatase YihX	2	2		19	16	26	2	6	58.9275	24.4093	0	14.5882	113.838	80.2729	127.98	10.62	0.0115151	420.016	27.7789	107.364	-79.5846
NADH-dependent phenylglyoxylate dehydrogenase subunit gamma	1	5	1	13	16	38		8	29.4638	61.0232	16.2459	0	77.8891	80.2729	187.047	14.16	0.0535035	451.942	35.5776	115.07	-79.4922
Cobalamin biosynthesis protein CobD	2	5	8	32	11	49	2	7	58.9275	61.0232	129.967	14.5882	191.727	55.1876	241.193	12.39	0.129222	752.614	83.306	162.702	-79.3965
FeMo cofactor biosynthesis protein NifB		2	1	12	2	40		3	0	24.4093	16.2459	0	71.8976	10.0341	196.892	5.31	0.112651	319.479	13.5517	92.9413	-79.3895
Thioredoxin reductase	17	34	35	102	92	132	9	23	500.884	414.958	568.606	65.647	611.13	461.569	649.744	40.71	0.167927	3272.54	494.816	574.148	-79.3315
Threonylcarbamoyl-AMP synthase	11	20	23	49	106	72	7	12	324.101	244.093	373.656	51.0587	293.582	531.808	354.406	21.24	0.190978	2172.7	313.95	393.265	-79.3153
L-rhamnose mutarotase				15	4	26			0	0	0	0	89.872	20.0682	127.98	0	0.0330283	237.92	0	79.3067	-79.3067
Na(+)-translocating NADH-quinone reductase subunit E	4	11	8	33	37	48	3	13	117.855	134.251	129.967	21.8823	197.718	185.631	236.27	23.01	0.00391732	1023.58	127.358	206.54	-79.1822
Multidrug resistance protein MexB	2	3	3	15	14	45	3	7	58.9275	36.6139	48.7377	21.8823	89.872	70.2388	221.504	12.39	0.0870672	547.776	48.0931	127.205	-79.1117
Putative peroxiredoxin bcp	1	4		12	26	23	1	3	29.4638	48.8186	0	7.29411	71.8976	130.444	113.213	5.31	0.0121612	401.131	26.0941	105.185	-79.0906
DNA processing protein DprA	11	27	23	79	37	123	4	24	324.101	329.525	373.656	29.1764	473.326	185.631	605.443	42.48	0.280644	2320.86	342.427	421.467	-79.0392
tRNA-Lys(ctt)		13	3	21	33	31	1	21	0	158.66	48.7377	7.29411	125.821	165.563	152.591	37.17	0.0891465	658.667	69.1327	147.992	-78.859
Transcriptional regulatory protein NatR		5	8	39	19	20		1	0	61.0232	129.967	0	233.667	95.3241	98.446	1.77	0.126496	618.428	63.6635	142.479	-78.8157
Tyrosine-protein phosphatase CpsB		4		22	9	22		6	0	48.8186	0	0	131.812	45.1535	108.291	10.62	0.0307112	334.075	16.2729	95.0855	-78.8126
UDP-N-acetylglucosamine 1-carboxyvinyltransferase	7	19	13	36	54	81	4	13	206.246	231.888	211.197	29.1764	215.693	270.921	398.706	23.01	0.112119	1563.83	216.444	295.107	-78.663
Penicillin-binding protein 2					47		2		0	0	0	14.5882	0	235.802	0	0	0.18695	250.39	0	78.6006	-78.6006
Ribosomal RNA small subunit methyltransferase G	13	25	28	74	92	96	7	17	383.029	305.116	454.885	51.0587	443.369	461.569	472.541	30.09	0.0754467	2571.57	381.01	459.16	-78.1496
FMN reductase (NADPH)	2	11	10	29	20	64	1	4	58.9275	134.251	162.459	7.29411	173.753	100.341	315.027	7.08	0.164778	952.053	118.546	196.374	-77.8278
Amino-acid carrier protein AlsT	19	31	24	94	89	112	9	18	559.811	378.344	389.902	65.647	563.198	446.518	551.298	31.86	0.162883	2954.72	442.686	520.338	-77.6523
Autolysin	2	5	2	17	27	30	1	3	58.9275	61.0232	32.4918	7.29411	101.855	135.461	147.669	5.31	0.00465196	544.721	50.8142	128.328	-77.514
Acyl carrier protein	14	34	34	98	118	88	3	28	412.493	414.958	552.361	21.8823	587.164	592.013	433.163	49.56	0.164195	3014.03	459.937	537.446	-77.5094
V-type sodium ATPase subunit B	5	16	11	32	62	51	2	7	147.319	195.274	178.705	14.5882	191.727	311.058	251.037	12.39	0.0528246	1289.71	173.766	251.274	-77.508
Cobalt-precorrin-5B C(1)-methyltransferase		1	5	19	4	39		2	0	12.2046	81.2295	0	113.838	20.0682	191.97	3.54	0.118496	419.31	31.1447	108.625	-77.4806
D-inositol-3-phosphate glycosyltransferase	1	7	1	20	19	30	1	3	29.4638	85.4325	16.2459	7.29411	119.829	95.3241	147.669	5.31	0.0206703	501.259	43.7141	120.941	-77.2268
putative sugar transferase EpsL	1	3	2	21	26	15	1	3	29.4638	36.6139	32.4918	7.29411	125.821	130.444	73.8345	5.31	0.0067114	435.962	32.8565	110.033	-77.1765
Ribonuclease HI	7	24	13	52	45	82	3	16	206.246	292.912	211.197	21.8823	311.556	225.768	403.629	28.32	0.129712	1673.19	236.785	313.651	-76.866
D-amino acid dehydrogenase	4	10	2	26	24	46	1	10	117.855	122.046	32.4918	7.29411	155.778	120.409	226.426	17.7	0.0733278	782.301	90.7978	167.538	-76.74
Putative acetyltransferase	2	6	7	29	21	40	1	4	58.9275	73.2279	113.721	7.29411	173.753	105.358	196.892	7.08	0.0373098	729.174	81.9589	158.668	-76.7087
DNA-binding protein HU	10	21	19	49	87	73	2	20	294.638	256.298	308.672	14.5882	293.582	436.484	359.328	35.4	0.0789355	1963.59	286.536	363.131	-76.5956
Carbonic anhydrase 2	12	11	9	50	32	82	3	23	353.565	134.251	146.213	21.8823	299.573	160.546	403.629	40.71	0.243535	1519.66	211.343	287.916	-76.5729
GTP-binding protein TypA/BipA	8	18	17	41	70	74	2	21	235.71	219.684	276.18	14.5882	245.65	351.194	364.25	37.17	0.0682202	1707.26	243.858	320.365	-76.5069
Cell division protein FtsL	8	13	9	57	50	36	2	8	235.71	158.66	146.213	14.5882	341.514	250.853	177.203	14.16	0.119275	1324.74	180.195	256.523	-76.3286
tRNA 2-thiocytidine biosynthesis protein TtcA			1	4	43	1	1		0	0	16.2459	7.29411	23.9659	215.733	4.9223	0	0.161361	268.162	5.4153	81.5406	-76.1253
Acyl-[acyl-carrier-protein]--UDP-N-acetylglucosamine O-acyltransferase	9	16	13	45	52	75	1	13	265.174	195.274	211.197	7.29411	269.616	260.887	369.173	23.01	0.0674816	1578.61	223.882	299.892	-76.0103
Cyclic di-AMP synthase CdaA	7	23	18	57	65	69	2	11	206.246	280.707	292.426	14.5882	341.514	326.109	339.639	19.47	0.0251565	1801.23	259.793	335.754	-75.9606
5'-nucleotidase	1	3	2	17	25	20		4	29.4638	36.6139	32.4918	0	101.855	125.426	98.446	7.08	0.000486628	424.297	32.8565	108.576	-75.7193
Putative 2-hydroxyacid dehydrogenase	3	13	5	28	28	50	3	4	88.3913	158.66	81.2295	21.8823	167.761	140.478	246.115	7.08	0.0669078	904.517	109.427	184.785	-75.3575
Na(+)-translocating NADH-quinone reductase subunit D	5	12	8	28	45	52	3	12	147.319	146.456	129.967	21.8823	167.761	225.768	255.96	21.24	0.0234131	1095.11	141.247	216.496	-75.2489
Peptidase E		8		20	12	29		6	0	97.6372	0	0	119.829	60.2047	142.747	10.62	0.0698372	420.418	32.5457	107.594	-75.0479
Starch-binding protein SusD		17		14	42	28		6	0	207.479	0	0	83.8806	210.716	137.824	10.62	0.196292	639.9	69.1597	144.14	-74.9808
PhoH-like protein	18	38	17	62	113	113	7	23	530.348	463.777	276.18	51.0587	371.471	566.928	556.22	40.71	0.246209	2815.98	423.435	498.206	-74.7714
putative metallo-hydrolase	1	3	3	3	62	2	2	3	29.4638	36.6139	48.7377	14.5882	17.9744	311.058	9.8446	5.31	0.246775	468.28	38.2718	112.959	-74.6871
NADH pyrophosphatase	6	18	8	39	50	54	3	6	176.783	219.684	129.967	21.8823	233.667	250.853	265.804	10.62	0.0267189	1298.64	175.478	250.108	-74.6303
3-deoxy-D-manno-octulosonic acid transferase	5	12	14	35	38	70	3	11	147.319	146.456	227.443	21.8823	209.701	190.648	344.561	19.47	0.124727	1288.01	173.739	248.304	-74.5645
Chondroitin synthase		5	1	12	26	20	1	4	0	61.0232	16.2459	7.29411	71.8976	130.444	98.446	7.08	0.0200955	385.35	25.7564	100.262	-74.506
Glutamine--fructose-6-phosphate aminotransferase [isomerizing]	10	30	33	72	90	109	6	26	294.638	366.139	536.115	43.7646	431.386	451.535	536.531	46.02	0.199149	2660.11	398.964	473.151	-74.1867
Putative metallo-hydrolase YycJ	3	18	9	33	68	28	1	10	88.3913	219.684	146.213	7.29411	197.718	341.16	137.824	17.7	0.178552	1138.28	151.429	225.568	-74.1383
(2E%2C6E)-farnesyl diphosphate synthase		7		9	28	23		2	0	85.4325	0	0	53.9232	140.478	113.213	3.54	0.0624927	393.046	28.4775	102.538	-74.0604
Adenine deaminase	6	14	7	43	22	64	2	6	176.783	170.865	113.721	14.5882	257.633	110.375	315.027	10.62	0.15687	1158.99	153.79	227.679	-73.8889
Thymidylate synthase	6	26	9	42	48	75	4	19	176.783	317.321	146.213	29.1764	251.642	240.819	369.173	33.63	0.165761	1531.13	213.439	287.211	-73.7722
Endoribonuclease EndoA	1	12	7	27	44	26		7	29.4638	146.456	113.721	0	161.77	220.751	127.98	12.39	0.0853691	800.141	96.5469	170.167	-73.6197
putative phospholipid ABC transporter permease protein MlaE	10	16	15	50	50	82	5	14	294.638	195.274	243.688	36.4705	299.573	250.853	403.629	24.78	0.120452	1724.13	244.533	318.018	-73.4849
High-affinity branched-chain amino acid transport ATP-binding protein LivF	3	12	18	56	37	46		10	88.3913	146.456	292.426	0	335.522	185.631	226.426	17.7	0.192627	1274.85	175.758	249.193	-73.4353
Lon protease 2	1	13	2	18	32	35	1	7	29.4638	158.66	32.4918	7.29411	107.846	160.546	172.281	12.39	0.0966387	668.583	73.5387	146.891	-73.3523
tRNA-Glu(ttc)	6	33	14	44	93	60	5	35	176.783	402.753	227.443	36.4705	263.625	466.586	295.338	61.95	0.238724	1869	268.993	341.85	-72.8569
tRNA (guanine-N(7)-)-methyltransferase	12	27	20	58	79	98	8	15	353.565	329.525	324.918	58.3528	347.505	396.348	482.386	26.55	0.0731269	2292.6	336.003	408.746	-72.7432
Phosphoribosyl 1%2C2-cyclic phosphate phosphodiesterase	3	5	5	23	9	54		11	88.3913	61.0232	81.2295	0	137.804	45.1535	265.804	19.47	0.161315	679.406	76.8813	149.587	-72.7059
Cobalamin biosynthesis bifunctional protein CbiET			6	18	6	36		3	0	0	97.4754	0	107.846	30.1023	177.203	5.31	0.123217	412.627	32.4918	105.051	-72.5587
Peptidyl-prolyl cis-trans isomerase Mip	1	2		13	15	24		2	29.4638	24.4093	0	0	77.8891	75.2559	118.135	3.54	0.00599374	325.153	17.9577	90.4267	-72.469
Putative prophage phiRv2 integrase	2	2	9	34	17	32		7	58.9275	24.4093	146.213	0	203.71	85.29	157.514	12.39	0.110841	676.063	76.5166	148.838	-72.3212
Nickel and cobalt resistance protein CnrA	1	2	1	19	8	27	2	7	29.4638	24.4093	16.2459	14.5882	113.838	40.1365	132.902	12.39	0.0322948	371.584	23.373	95.6255	-72.2525
UDP-glucose:undecaprenyl-phosphate glucose-1-phosphate transferase	8	15	7	56	46	37	3	7	235.71	183.07	113.721	21.8823	335.522	230.785	182.125	12.39	0.139113	1302.82	177.5	249.477	-71.977
Putative lipid II flippase FtsW					42	1	2	1	0	0	0	14.5882	0	210.716	4.9223	1.77	0.179519	230.227	0	71.8796	-71.8796
Poly-beta-1%2C6-N-acetyl-D-glucosamine synthase	4	18	1	26	53	30	1	1	117.855	219.684	16.2459	7.29411	155.778	265.904	147.669	1.77	0.1814	930.43	117.928	189.784	-71.8556
Phosphatidate cytidylyltransferase	12	34	24	74	94	93	3	17	353.565	414.958	389.902	21.8823	443.369	471.603	457.774	30.09	0.0109304	2553.05	386.142	457.582	-71.4405
Histidine--tRNA ligase	14	26	28	66	95	107	7	21	412.493	317.321	454.885	51.0587	395.437	476.621	526.686	37.17	0.135188	2634.5	394.9	466.248	-71.3484
Membrane-bound lytic murein transglycosylase F	11	14	6	46	44	63	3	14	324.101	170.865	97.4754	21.8823	275.608	220.751	310.105	24.78	0.187884	1420.79	197.481	268.821	-71.3404
Tyrosine-protein kinase ptk	2	5	1	16	31	20	1	2	58.9275	61.0232	16.2459	7.29411	95.8635	155.529	98.446	3.54	0.0214744	493.329	45.3989	116.613	-71.2139
Undecaprenyl-phosphate 4-deoxy-4-formamido-L-arabinose transferase		3	2	8	31	16		3	0	36.6139	32.4918	0	47.9317	155.529	78.7568	5.31	0.0525341	351.323	23.0352	94.0725	-71.0372
Fumarate hydratase class I%2C anaerobic	4	11	7	27	37	47	2	11	117.855	134.251	113.721	14.5882	161.77	185.631	231.348	19.47	0.0146392	959.165	121.942	192.916	-70.9738
Altronate oxidoreductase	2	6	2	20	17	35			58.9275	73.2279	32.4918	0	119.829	85.29	172.281	0	0.032121	542.047	54.8824	125.8	-70.9176
Phosphoribosylformylglycinamidine cyclo-ligase	10	32	23	62	88	93	3	18	294.638	390.549	373.656	21.8823	371.471	441.501	457.774	31.86	0.0748446	2351.47	352.947	423.582	-70.6347
High-affinity zinc uptake system binding-protein ZnuA	3	18	5	34	37	43		6	88.3913	219.684	81.2295	0	203.71	185.631	211.659	10.62	0.0985627	990.304	129.768	200.333	-70.5652
Unsaturated glucuronyl hydrolase		5	3	24	2	34		6	0	61.0232	48.7377	0	143.795	10.0341	167.358	10.62	0.124967	430.949	36.587	107.063	-70.4756
3%2C6-anhydro-alpha-L-galactose dehydrogenase		7	8	14	33	36		3	0	85.4325	129.967	0	83.8806	165.563	177.203	5.31	0.10863	642.046	71.7999	142.215	-70.4155
Replicative DNA helicase	19	44	44	88	146	155	6	26	559.811	537.004	714.82	43.7646	527.249	732.49	762.957	46.02	0.24514	3878.1	603.878	674.232	-70.3537
Non-canonical purine NTP pyrophosphatase					42		1		0	0	0	7.29411	0	210.716	0	0	0.18695	218.011	0	70.2388	-70.2388
Inosose dehydratase	4	1	1	23	21	23	1	2	117.855	12.2046	16.2459	7.29411	137.804	105.358	113.213	3.54	0.061512	509.975	48.7685	118.792	-70.0231
Isoprimeverose transporter		2		21	3	19		5	0	24.4093	0	0	125.821	15.0512	93.5237	8.85	0.0538634	258.805	8.13643	78.1319	-69.9955
10 kDa chaperonin 1		8	2	12	21	33		9	0	97.6372	32.4918	0	71.8976	105.358	162.436	15.93	0.0739601	469.821	43.3763	113.231	-69.8543
Regulator of sigma-W protease RasP	2	8	3	30	31	16		2	58.9275	97.6372	48.7377	0	179.744	155.529	78.7568	3.54	0.0546551	619.332	68.4341	138.01	-69.5758
Transcription antitermination protein RfaH	4	6	3	32	7	45	1	12	117.855	73.2279	48.7377	7.29411	191.727	35.1194	221.504	21.24	0.159902	695.465	79.9402	149.45	-69.5098
Multidrug resistance protein MdtC	9	16	9	39	47	70	3	14	265.174	195.274	146.213	21.8823	233.667	235.802	344.561	24.78	0.120745	1442.57	202.22	271.343	-69.1229
Aminopeptidase C		11		18	21	26	1	6	0	134.251	0	7.29411	107.846	105.358	127.98	10.62	0.10133	482.73	44.7504	113.728	-68.9778
Putative glycosyltransferase EpsE		6	3	15	29	19			0	73.2279	48.7377	0	89.872	145.495	93.5237	0	0.0348285	450.856	40.6552	109.63	-68.975
2-hydroxyisocaproyl-CoA dehydratase activator		2	13	29	28	26		5	0	24.4093	211.197	0	173.753	140.478	127.98	8.85	0.184506	677.816	78.5353	147.403	-68.868
Stage II sporulation protein Q	4	4	12	25	40	44	1	10	117.855	48.8186	194.951	7.29411	149.787	200.682	216.581	17.7	0.108498	935.969	120.541	189.017	-68.4753
NADH-specific methylglyoxal reductase	1	6	7	35	4	39		7	29.4638	73.2279	113.721	0	209.701	20.0682	191.97	12.39	0.176485	638.152	72.1376	140.58	-68.4421
Cell division ATP-binding protein FtsE	10	19	20	52	72	78	4	12	294.638	231.888	324.918	29.1764	311.556	361.228	383.94	21.24	0.0601307	1937.34	283.815	352.241	-68.4267
DNA translocase FtsK	6	5	12	40	48	32	2	6	176.783	61.0232	194.951	14.5882	239.659	240.819	157.514	10.62	0.122304	1085.34	144.252	212.664	-68.4115
Na(+)-translocating NADH-quinone reductase subunit F	6	8	12	32	53	44	4	12	176.783	97.6372	194.951	29.1764	191.727	265.904	216.581	21.24	0.0692857	1172.76	156.457	224.737	-68.2806
Clostripain		2		15	13	15		2	0	24.4093	0	0	89.872	65.2218	73.8345	3.54	0.00165495	253.338	8.13643	76.3094	-68.173
Polyol:NADP oxidoreductase	4	11	14	45	10	74	2	10	117.855	134.251	227.443	14.5882	269.616	50.1706	364.25	17.7	0.264659	1178.17	159.85	228.012	-68.1627
Beta-glucosidase BoGH3A		2	1	17	4	25		2	0	24.4093	16.2459	0	101.855	20.0682	123.058	3.54	0.0509756	285.636	13.5517	81.6602	-68.1085
Adenylosuccinate synthetase	15	25	24	67	100	89	9	23	441.956	305.116	389.902	65.647	401.428	501.706	438.085	40.71	0.12043	2543.84	378.991	447.073	-68.0816
GalNAc-alpha-(1->4)-GalNAc-alpha-(1->3)-diNAcBac-PP-undecaprenol alpha-1%2C4-N-acetyl-D-galactosaminyltransferase		5		16	21	13		1	0	61.0232	0	0	95.8635	105.358	63.9899	1.77	0.0231948	326.235	20.3411	88.4039	-68.0628
Acetylornithine deacetylase	3	2	1	16	11	37	2	6	88.3913	24.4093	16.2459	14.5882	95.8635	55.1876	182.125	10.62	0.0977423	476.811	43.0155	111.059	-68.0433
DNA primase	16	69	53	108	191	157	4	27	471.42	842.121	861.033	29.1764	647.079	958.258	772.801	47.79	0.342773	4581.89	724.858	792.713	-67.8548
RNA polymerase sigma-54 factor	8	18	13	40	49	78	4	11	235.71	219.684	211.197	29.1764	239.659	245.836	383.94	19.47	0.114425	1565.2	222.197	289.811	-67.6146
30S ribosomal protein S1	12	22	24	57	120	55	8	15	353.565	268.502	389.902	58.3528	341.514	602.047	270.727	26.55	0.281307	2284.61	337.323	404.762	-67.4394
Putative serine protease HtrA			1	10	10	22		1	0	0	16.2459	0	59.9147	50.1706	108.291	1.77	0.0114832	234.622	5.4153	72.792	-67.3767
Sensor histidine kinase TmoS	1	17	2	19	35	37		8	29.4638	207.479	32.4918	0	113.838	175.597	182.125	14.16	0.171649	740.995	89.8115	157.187	-67.3752
putative ribonucleotide transport ATP-binding protein mkl	4	10	13	33	27	65	1	9	117.855	122.046	211.197	7.29411	197.718	135.461	319.95	15.93	0.169758	1111.52	150.366	217.71	-67.3435
Protein UmuD	2	12	1	13	10	60		3	58.9275	146.456	16.2459	0	77.8891	50.1706	295.338	5.31	0.240071	645.027	73.8764	141.133	-67.2562
Threonine-phosphate decarboxylase	1	5	12	25	20	48			29.4638	61.0232	194.951	0	149.787	100.341	236.27	0	0.178596	771.836	95.1459	162.133	-66.9869
Phosphoglycolate phosphatase	22	28	19	92	84	107	10	20	648.203	341.73	308.672	72.9411	551.215	421.433	526.686	35.4	0.296238	2870.88	432.868	499.778	-66.9098
Antitoxin HigA	2	1		23	10	17		2	58.9275	12.2046	0	0	137.804	50.1706	83.6791	3.54	0.0494637	342.786	23.7107	90.5512	-66.8404
Hypoxanthine phosphoribosyltransferase	8	18	12	46	43	73	4	15	235.71	219.684	194.951	29.1764	275.608	215.733	359.328	26.55	0.0989378	1530.19	216.782	283.556	-66.7748
Reverse rubrerythrin-2		8		15	13	29		7	0	97.6372	0	0	89.872	65.2218	142.747	12.39	0.0843527	395.478	32.5457	99.2802	-66.7344
Penicillin-binding protein 2B	1	12		18	26	28		4	29.4638	146.456	0	0	107.846	130.444	137.824	7.08	0.108696	552.034	58.6398	125.371	-66.7316
Aspartate-semialdehyde dehydrogenase	9	15	19	42	66	76	3	12	265.174	183.07	308.672	21.8823	251.642	331.126	374.095	21.24	0.132271	1735.66	252.305	318.954	-66.6489
Hemolysin C	1	1	1	7	31	12	2	2	29.4638	12.2046	16.2459	14.5882	41.9403	155.529	59.0676	3.54	0.0687879	329.039	19.3048	85.5122	-66.2075
Putative monooxygenase YcnE		8	7	17	29	33		1	0	97.6372	113.721	0	101.855	145.495	162.436	1.77	0.0861518	621.144	70.4528	136.595	-66.1424
UDP-glucose 4-epimerase	15	33	50	100	110	143	7	40	441.956	402.753	812.295	51.0587	599.147	551.876	703.889	70.8	0.328773	3562.98	552.335	618.304	-65.9692
Cysteine--tRNA ligase	20	27	26	77	101	116	2	19	589.275	329.525	422.393	14.5882	461.343	506.723	570.987	33.63	0.234109	2894.84	447.065	513.018	-65.953
Glutamate 5-kinase 1		3		10	22	13			0	36.6139	0	0	59.9147	110.375	63.9899	0	0.0156795	270.894	12.2046	78.0933	-65.8886
putative adenylyltransferase/sulfurtransferase MoeZ		10	2	9	29	31			0	122.046	32.4918	0	53.9232	145.495	152.591	0	0.122662	506.548	51.5128	117.336	-65.8237
tRNA-Ser(gga)	5	9	6	23	59	24	2	13	147.319	109.842	97.4754	14.5882	137.804	296.006	118.135	23.01	0.161027	921.17	118.212	183.982	-65.7698
Threonine--tRNA ligase 1	1	13	5	23	38	28		6	29.4638	158.66	81.2295	0	137.804	190.648	137.824	10.62	0.0942946	735.63	89.7846	155.425	-65.6409
Ribosomal RNA large subunit methyltransferase F	2	2		17	12	24		3	58.9275	24.4093	0	0	101.855	60.2047	118.135	5.31	0.026989	363.532	27.7789	93.3983	-65.6194
putative peptidoglycan glycosyltransferase FtsW	13	33	30	95	47	135	3	23	383.029	402.753	487.377	21.8823	569.189	235.802	664.511	40.71	0.325228	2764.54	424.386	489.834	-65.4476
Exo-alpha-(1->6)-L-arabinopyranosidase			3	12	8	27		2	0	0	48.7377	0	71.8976	40.1365	132.902	3.54	0.0540322	293.674	16.2459	81.6454	-65.3995
Purine-binding protein		6		20	18	12		4	0	73.2279	0	0	119.829	90.307	59.0676	7.08	0.0477329	342.432	24.4093	89.7347	-65.3254
Aquaporin Z	2	5		18	13	29	6	13	58.9275	61.0232	0	43.7646	107.846	65.2218	142.747	23.01	0.0477335	479.53	39.9836	105.272	-65.2881
Pyrimidine/purine nucleoside phosphorylase	2	6	1	22	6	37	1	5	58.9275	73.2279	16.2459	7.29411	131.812	30.1023	182.125	8.85	0.122416	499.735	49.4671	114.68	-65.2128
Serine/threonine-protein kinase pkn1	4	11	6	11	70	26	1	2	117.855	134.251	97.4754	7.29411	65.9061	351.194	127.98	3.54	0.248377	901.956	116.527	181.693	-65.1662
Asp/Glu-specific dipeptidyl-peptidase		10		14	22	25		3	0	122.046	0	0	83.8806	110.375	123.058	5.31	0.0992952	439.36	40.6822	105.771	-65.089
Hydrazine synthase subunit gamma		3	2	17		33		6	0	36.6139	32.4918	0	101.855	0	162.436	10.62	0.126606	333.397	23.0352	88.097	-65.0617
Iron-sulfur cluster repair protein YtfE		4		16	3	27		9	0	48.8186	0	0	95.8635	15.0512	132.902	15.93	0.0829332	292.635	16.2729	81.2723	-64.9994
UvrABC system protein B	15	29	31	67	106	114	3	19	441.956	353.935	503.623	21.8823	401.428	531.808	561.142	33.63	0.188884	2815.78	433.171	498.126	-64.955
Malate dehydrogenase	4	10	2	29	29	30	2	12	117.855	122.046	32.4918	14.5882	173.753	145.495	147.669	21.24	0.0505622	753.898	90.7978	155.639	-64.841
Bifunctional adenosylcobalamin biosynthesis protein CobP	2	2	4	21	3	41		1	58.9275	24.4093	64.9836	0	125.821	15.0512	201.814	1.77	0.154625	491.007	49.4401	114.229	-64.7887
Phosphoserine phosphatase SerB2		5	1	14	6	32		9	0	61.0232	16.2459	0	83.8806	30.1023	157.514	15.93	0.0955517	348.766	25.7564	90.4988	-64.7425
Caffeyl-CoA reductase-Etf complex subunit CarD	5	11	4	28	38	37	1	7	147.319	134.251	64.9836	7.29411	167.761	190.648	182.125	12.39	0.0352707	894.382	115.518	180.178	-64.6603
Aminomethyltransferase	3	16	4	29	37	37	4	9	88.3913	195.274	64.9836	29.1764	173.753	185.631	182.125	15.93	0.0927618	919.335	116.216	180.503	-64.2865
Coenzyme F420:L-glutamate ligase	1	5	6	19	12	42	1	9	29.4638	61.0232	97.4754	7.29411	113.838	60.2047	206.737	15.93	0.122046	576.036	62.6541	126.926	-64.2723
N-acetylmuramoyl-L-alanine amidase AmiB	5	3	5	31	16	39	4	6	147.319	36.6139	81.2295	29.1764	185.736	80.2729	191.97	10.62	0.127656	752.317	88.3874	152.659	-64.272
Beta-glucanase	1	12	14	25	33	57		8	29.4638	146.456	227.443	0	149.787	165.563	280.571	14.16	0.207707	999.283	134.454	198.64	-64.1862
HTH-type transcriptional regulator LutR	5	5	8	42	28	28	3	2	147.319	61.0232	129.967	21.8823	251.642	140.478	137.824	3.54	0.117944	890.135	112.77	176.648	-63.8782
Methicillin resistance regulatory protein MecI		2	1	18	14	11		4	0	24.4093	16.2459	0	107.846	70.2388	54.1453	7.08	0.0108027	272.886	13.5517	77.4102	-63.8585
N%2CN'-diacetylbacillosaminyl-diphospho-undecaprenol alpha-1%2C3-N-acetylgalactosaminyltransferase		5	2	12	15	28		3	0	61.0232	32.4918	0	71.8976	75.2559	137.824	5.31	0.0414948	378.493	31.1717	94.9926	-63.821
Fatty acid-binding protein	1	5	3	12	29	23		2	29.4638	61.0232	48.7377	0	71.8976	145.495	113.213	3.54	0.0256785	469.83	46.4082	110.202	-63.7935
Lipoteichoic acid synthase 2	3	5	5	15	22	45		2	88.3913	61.0232	81.2295	0	89.872	110.375	221.504	3.54	0.100676	652.395	76.8813	140.584	-63.7023
Catalase	5	8	7	28	24	53	3	11	147.319	97.6372	113.721	21.8823	167.761	120.409	260.882	19.47	0.110403	929.612	119.559	183.017	-63.4584
Putative glycosyltransferase EpsF		7	6	29	23	17		12	0	85.4325	97.4754	0	173.753	115.392	83.6791	21.24	0.09637	555.732	60.9693	124.275	-63.3054
Protein		2		20	9	10		2	0	24.4093	0	0	119.829	45.1535	49.223	3.54	0.0343222	238.615	8.13643	71.402	-63.2655
2-C-methyl-D-erythritol 4-phosphate cytidylyltransferase	12	16	17	61	43	88	5	17	353.565	195.274	276.18	36.4705	365.48	215.733	433.163	30.09	0.234099	1875.87	275.007	338.125	-63.1186
23S rRNA (guanosine-2'-O-)-methyltransferase RlmB	6	7	10	32	36	49	5	8	176.783	85.4325	162.459	36.4705	191.727	180.614	241.193	14.16	0.0685684	1074.68	141.558	204.511	-62.9533
Bifunctional (p)ppGpp synthase/hydrolase SpoT		6	1	10	18	26	2	6	0	73.2279	16.2459	14.5882	59.9147	90.307	127.98	10.62	0.0506671	382.264	29.8246	92.7339	-62.9093
Xyloglucanase Xgh74A		1		3	4	33		3	0	12.2046	0	0	17.9744	20.0682	162.436	5.31	0.130494	212.683	4.06822	66.8262	-62.758
Cytochrome c-type protein NrfH		2	2	12	6	29		4	0	24.4093	32.4918	0	71.8976	30.1023	142.747	7.08	0.0709654	301.648	18.967	81.5822	-62.6152
Putative phosphatase		7	7	23	24	26	1	4	0	85.4325	113.721	7.29411	137.804	120.409	127.98	7.08	0.0727396	592.641	66.3846	128.731	-62.3464
Serine/threonine-protein kinase RsbT		1		10	14	14		3	0	12.2046	0	0	59.9147	70.2388	68.9122	5.31	0.000139471	211.27	4.06822	66.3552	-62.287
Carboxynorspermidine synthase	5	15	11	35	36	62	1	8	147.319	183.07	178.705	7.29411	209.701	180.614	305.183	14.16	0.0943908	1211.89	169.698	231.833	-62.1349
Spore maturation protein B	4	12	14	36	45	48	3	12	117.855	146.456	227.443	21.8823	215.693	225.768	236.27	21.24	0.068297	1191.37	163.918	225.91	-61.9925
HTH-type transcriptional repressor YtrA	7	19	28	87	65	47	2	5	206.246	231.888	454.885	14.5882	521.258	326.109	231.348	8.85	0.311328	1986.32	297.673	359.572	-61.8983
Sensor histidine kinase YehU					37		2		0	0	0	14.5882	0	185.631	0	0	0.18695	200.219	0	61.877	-61.877
Exopolyphosphatase	2	5	3	21	20	26	3	3	58.9275	61.0232	48.7377	21.8823	125.821	100.341	127.98	5.31	0.00152641	544.713	56.2295	118.047	-61.8178
UDP-3-O-acyl-N-acetylglucosamine deacetylase	4	18	13	33	50	58	3	9	117.855	219.684	211.197	21.8823	197.718	250.853	285.493	15.93	0.105055	1304.68	182.912	244.688	-61.7765
Endoglucanase D		2		15	16	8		1	0	24.4093	0	0	89.872	80.2729	39.3784	1.77	0.0121355	233.933	8.13643	69.8411	-61.7047
Putative alkyl/aryl-sulfatase YjcS	5	16	7	31	29	63		13	147.319	195.274	113.721	0	185.736	145.495	310.105	23.01	0.16209	1097.65	152.105	213.778	-61.6736
putative adenylyl-sulfate kinase		4	3	10	12	33		7	0	48.8186	48.7377	0	59.9147	60.2047	162.436	12.39	0.089077	380.112	32.5188	94.1851	-61.6663
Thioredoxin-dependent 5'-adenylylsulfate reductase		4	2	14	3	34		9	0	48.8186	32.4918	0	83.8806	15.0512	167.358	15.93	0.12694	347.6	27.1035	88.7633	-61.6599
NADP-reducing hydrogenase subunit HndD	4	9	2	36	24	22		7	117.855	109.842	32.4918	0	215.693	120.409	108.291	12.39	0.115564	704.582	86.7296	148.131	-61.4014
Thermophilic serine proteinase		9		10	28	19			0	109.842	0	0	59.9147	140.478	93.5237	0	0.115303	403.758	36.6139	97.972	-61.3581
Bifunctional oligoribonuclease and PAP phosphatase NrnA	10	22	28	58	82	90	1	14	294.638	268.502	454.885	7.29411	347.505	411.399	443.007	24.78	0.198479	2227.23	339.342	400.637	-61.2954
Electron transport complex subunit RsxA	13	23	22	51	87	94	6	18	383.029	280.707	357.41	43.7646	305.565	436.484	462.696	31.86	0.173604	2269.66	340.382	401.582	-61.1999
Cellobiose phosphorylase		2	2	11	24	11		1	0	24.4093	32.4918	0	65.9061	120.409	54.1453	1.77	0.0269357	297.362	18.967	80.1536	-61.1866
Ribosome maturation factor RimP	10	25	23	57	86	78	4	17	294.638	305.116	373.656	29.1764	341.514	431.467	383.94	30.09	0.0818132	2159.51	324.47	385.64	-61.1703
3-isopropylmalate dehydratase small subunit		2	3	13	14	22		4	0	24.4093	48.7377	0	77.8891	70.2388	108.291	7.08	0.0143136	329.566	24.3823	85.4728	-61.0905
FKBP-type 22 kDa peptidyl-prolyl cis-trans isomerase	7	10	1	23	55	23	2	2	206.246	122.046	16.2459	14.5882	137.804	275.938	113.213	3.54	0.230775	886.082	114.846	175.652	-60.8054
UDP-glucose 6-dehydrogenase TuaD		9	11	19	27	45		6	0	109.842	178.705	0	113.838	135.461	221.504	10.62	0.189775	759.349	96.1822	156.934	-60.7518
2%2C3-dimethylmalate dehydratase large subunit	1	7	19	32	57	26		8	29.4638	85.4325	308.672	0	191.727	285.972	127.98	14.16	0.282397	1029.25	141.189	201.893	-60.7036
HTH-type transcriptional regulator DegA		1	7	19	23	16		2	0	12.2046	113.721	0	113.838	115.392	78.7568	3.54	0.0926493	433.913	41.9753	102.662	-60.687
Ammonia channel	6	16	14	34	72	44	4	13	176.783	195.274	227.443	29.1764	203.71	361.228	216.581	23.01	0.156561	1410.2	199.833	260.506	-60.6733
Phosphoserine phosphatase	4	7	6	16	29	49	3	2	117.855	85.4325	97.4754	21.8823	95.8635	145.495	241.193	3.54	0.118855	805.196	100.254	160.85	-60.596
Endo-beta-1%2C4-xylanase Xyn10C		3		10	10	22			0	36.6139	0	0	59.9147	50.1706	108.291	0	0.0246802	254.99	12.2046	72.792	-60.5873
Methylmalonyl-CoA carboxyltransferase 5S subunit	4	7	2	23	34	22	1	6	117.855	85.4325	32.4918	7.29411	137.804	170.58	108.291	10.62	0.0604964	659.748	78.5931	138.891	-60.2983
Putative pyridoxal phosphate-dependent acyltransferase		8		11	10	33		4	0	97.6372	0	0	65.9061	50.1706	162.436	7.08	0.138136	376.15	32.5457	92.8376	-60.2918
Swarming motility protein SwrC	8	11	10	52	30	51	4	13	235.71	134.251	162.459	29.1764	311.556	150.512	251.037	23.01	0.170798	1274.7	177.473	237.702	-60.2284
Homoserine dehydrogenase	2	9	14	33	42	34		5	58.9275	109.842	227.443	0	197.718	210.716	167.358	8.85	0.15497	972.005	132.071	191.931	-59.8604
Colicin I receptor	10	12	25	49	46	102	5	16	294.638	146.456	406.147	36.4705	293.582	230.785	502.075	28.32	0.309919	1910.15	282.414	342.147	-59.7335
Dihydrolipoyl dehydrogenase	11	18	10	54	51	62	3	9	324.101	219.684	162.459	21.8823	323.539	255.87	305.183	15.93	0.156121	1612.72	235.415	294.864	-59.4493
Butanoate coenzyme A-transferase		9	7	25	6	45		6	0	109.842	113.721	0	149.787	30.1023	221.504	10.62	0.213551	624.956	74.521	133.798	-59.2765
Putative glycosyltransferase EpsH	11	17	29	61	82	82		19	324.101	207.479	471.131	0	365.48	411.399	403.629	33.63	0.243762	2183.22	334.237	393.502	-59.2652
Riboflavin synthase	9	19	12	45	42	79	6	13	265.174	231.888	194.951	43.7646	269.616	210.716	388.862	23.01	0.176256	1604.97	230.671	289.731	-59.0605
Beta-barrel assembly-enhancing protease	25	35	27	77	145	120	12	17	736.594	427.163	438.639	87.5293	461.343	727.473	590.676	30.09	0.333275	3469.42	534.132	593.164	-59.0322
Elongation factor 4	15	22	21	63	90	81	6	23	441.956	268.502	341.164	43.7646	377.462	451.535	398.706	40.71	0.172628	2323.09	350.541	409.235	-58.6939
Aspartate--tRNA(Asp/Asn) ligase	1	2	3	14	29	10		7	29.4638	24.4093	48.7377	0	83.8806	145.495	49.223	12.39	0.0570666	381.209	34.2036	92.8661	-58.6625
Ribosomal RNA large subunit methyltransferase L	2	1	4	17	33	9		1	58.9275	12.2046	64.9836	0	101.855	165.563	44.3007	1.77	0.10289	447.834	45.3719	103.906	-58.5343
Putative O-methyltransferase	2	3	3	16	21	24			58.9275	36.6139	48.7377	0	95.8635	105.358	118.135	0	0.00153323	463.636	48.0931	106.452	-58.3593
50S ribosomal protein L31 type B	2	7		15	22	24	1	8	58.9275	85.4325	0	7.29411	89.872	110.375	118.135	14.16	0.0474105	470.037	48.12	106.128	-58.0075
4-O-beta-D-mannosyl-D-glucose phosphorylase	1	7	1	11	31	17			29.4638	85.4325	16.2459	0	65.9061	155.529	83.6791	0	0.0847346	436.256	43.7141	101.705	-57.9906
Monoacylglycerol lipase	2	8	4	32	11	30		8	58.9275	97.6372	64.9836	0	191.727	55.1876	147.669	14.16	0.120762	616.132	73.8494	131.528	-57.6785
Glycogen phosphorylase	7	24	22	39	85	75		18	206.246	292.912	357.41	0	233.667	426.45	369.173	31.86	0.234375	1885.86	285.523	343.097	-57.5741
RNA polymerase sigma-H factor	2	9	4	22	39	16	3	5	58.9275	109.842	64.9836	21.8823	131.812	195.665	78.7568	8.85	0.0996048	661.87	77.9176	135.411	-57.4938
Adenylosuccinate lyase	13	25	22	50	78	107	4	18	383.029	305.116	357.41	29.1764	299.573	391.331	526.686	31.86	0.228837	2292.32	348.518	405.863	-57.3451
Ribosomal RNA small subunit methyltransferase D	8	24	20	49	87	60	3	14	235.71	292.912	324.918	21.8823	293.582	436.484	295.338	24.78	0.174503	1900.83	284.513	341.801	-57.2882
Oxygen-independent coproporphyrinogen-III oxidase-like protein HemZ	3	10	12	29	50	31		4	88.3913	122.046	194.951	0	173.753	250.853	152.591	7.08	0.128559	982.585	135.13	192.399	-57.2694
Glutamate/gamma-aminobutyrate antiporter	4	22	11	37	34	70	3	9	117.855	268.502	178.705	21.8823	221.684	170.58	344.561	15.93	0.222595	1323.77	188.354	245.608	-57.2544
putative dolichyl-phosphate-mannose--protein mannosyltransferase				13	3	16		2	0	0	0	0	77.8891	15.0512	78.7568	3.54	0.0266733	171.697	0	57.2324	-57.2324
General stress protein 16O	1	8		9	36	13		1	29.4638	97.6372	0	0	53.9232	180.614	63.9899	1.77	0.157964	425.628	42.367	99.5091	-57.1421
Short-chain-enoyl-CoA hydratase	2	18	16	28	56	53	3	7	58.9275	219.684	259.934	21.8823	167.761	280.955	260.882	12.39	0.232341	1270.03	179.515	236.533	-57.0176
8-amino-7-oxononanoate synthase	3	15	3	23	39	32	2	4	88.3913	183.07	48.7377	14.5882	137.804	195.665	157.514	7.08	0.129531	825.77	106.733	163.661	-56.928
Insertion sequence putative ATP-binding protein					34		1		0	0	0	7.29411	0	170.58	0	0	0.18695	177.874	0	56.86	-56.86
Iron-regulated protein A	2	1		13	5	28	1	2	58.9275	12.2046	0	7.29411	77.8891	25.0853	137.824	3.54	0.101483	319.225	23.7107	80.2663	-56.5556
Isocitrate dehydrogenase [NADP]	3	3	13	32	40	23	2	9	88.3913	36.6139	211.197	14.5882	191.727	200.682	113.213	15.93	0.195445	856.412	112.067	168.541	-56.4734
UDP-N-acetylglucosamine 4-epimerase		9	7	20	18	37	1	5	0	109.842	113.721	7.29411	119.829	90.307	182.125	8.85	0.144613	623.119	74.521	130.754	-56.2328
Cellulase/esterase CelE		1		6	22	7		1	0	12.2046	0	0	35.9488	110.375	34.4561	1.77	0.0456499	192.985	4.06822	60.2601	-56.1918
Efflux pump membrane transporter BepG	4	9	1	29	22	26		4	117.855	109.842	16.2459	0	173.753	110.375	127.98	7.08	0.10558	656.05	81.3143	137.369	-56.055
dTDP-4-dehydrorhamnose reductase	9	23	15	49	47	87	3	14	265.174	280.707	243.688	21.8823	293.582	235.802	428.24	24.78	0.194456	1769.08	263.19	319.208	-56.0182
Hemin transport system permease protein HmuU	8	23	17	35	80	71	3	12	235.71	280.707	276.18	21.8823	209.701	401.365	349.483	21.24	0.19819	1775.03	264.199	320.183	-55.9841
Uroporphyrinogen-III C-methyltransferase		3	3	15	9	24		1	0	36.6139	48.7377	0	89.872	45.1535	118.135	1.77	0.0480389	338.512	28.4505	84.3869	-55.9364
2-amino-3-ketobutyrate coenzyme A ligase	4	13	4	27	29	41	3	9	117.855	158.66	64.9836	21.8823	161.77	145.495	201.814	15.93	0.0772328	872.46	113.833	169.693	-55.8599
Tricorn protease		7		15	6	27		4	0	85.4325	0	0	89.872	30.1023	132.902	7.08	0.123598	338.309	28.4775	84.2922	-55.8147
Sorbitol dehydrogenase		2	3	21	15	8		4	0	24.4093	48.7377	0	125.821	75.2559	39.3784	7.08	0.0622084	313.602	24.3823	80.1517	-55.7694
Diaminopimelate epimerase	14	33	26	77	80	110	6	20	412.493	402.753	422.393	43.7646	461.343	401.365	541.453	35.4	0.123485	2685.56	412.546	468.054	-55.5072
Beta-agarase C				3	7	23		2	0	0	0	0	17.9744	35.1194	113.213	3.54	0.0657703	166.307	0	55.4356	-55.4356
Phosphate regulon transcriptional regulatory protein PhoB	6	9	13	42	40	43	4	8	176.783	109.842	211.197	29.1764	251.642	200.682	211.659	14.16	0.0870251	1190.98	165.94	221.328	-55.3873
Ribonuclease Y	9	21	38	55	108	88	3	14	265.174	256.298	617.344	21.8823	329.531	541.842	433.163	24.78	0.350407	2465.23	379.605	434.845	-55.24
DNA recombination protein RmuC					33		2		0	0	0	14.5882	0	165.563	0	0	0.18695	180.151	0	55.1876	-55.1876
L-fucose mutarotase		5	2	20	15	13		1	0	61.0232	32.4918	0	119.829	75.2559	63.9899	1.77	0.0438057	352.59	31.1717	86.3584	-55.1867
Mannosylglucosyl-3-phosphoglycerate phosphatase	2	10	4	28	24	25	5	5	58.9275	122.046	64.9836	36.4705	167.761	120.409	123.058	8.85	0.0475203	693.656	81.9859	137.076	-55.0902
Beta sliding clamp	13	26	26	87	35	120	3	22	383.029	317.321	422.393	21.8823	521.258	175.597	590.676	38.94	0.349306	2432.16	374.248	429.177	-54.9293
Anti-sigma F factor	4	10	13	37	52	27	3	9	117.855	122.046	211.197	21.8823	221.684	260.887	132.902	15.93	0.161216	1088.45	150.366	205.158	-54.7918
Putative penicillin-binding protein PbpX		5		12	7	24			0	61.0232	0	0	71.8976	35.1194	118.135	0	0.0785744	286.175	20.3411	75.0508	-54.7097
UDP-N-acetylgalactosamine-undecaprenyl-phosphate N-acetylgalactosaminephosphotransferase		9	5	10	51	8	1	1	0	109.842	81.2295	7.29411	59.9147	255.87	39.3784	1.77	0.256902	553.528	63.6904	118.388	-54.6972
NAD(P)-dependent benzaldehyde dehydrogenase		10	1	13	29	16		4	0	122.046	16.2459	0	77.8891	145.495	78.7568	7.08	0.14272	440.433	46.0975	100.714	-54.6161
Valine--tRNA ligase	15	28	26	67	89	106	7	21	441.956	341.73	422.393	51.0587	401.428	446.518	521.764	37.17	0.153455	2626.85	402.027	456.57	-54.5435
Ribosomal RNA small subunit methyltransferase A	13	27	28	62	100	93	6	23	383.029	329.525	454.885	43.7646	371.471	501.706	457.774	40.71	0.179919	2542.15	389.146	443.65	-54.5038
2%2C3%2C4%2C5-tetrahydropyridine-2%2C6-dicarboxylate N-succinyltransferase	4	10	4	31	16	41	3	12	117.855	122.046	64.9836	21.8823	185.736	80.2729	201.814	21.24	0.134285	794.59	101.628	155.941	-54.3126
ATP phosphoribosyltransferase regulatory subunit		9	3	22	27	11		2	0	109.842	48.7377	0	131.812	135.461	54.1453	3.54	0.129949	479.998	52.8598	107.139	-54.2796
4'-phosphopantetheinyl transferase Sfp			5	20	9	16		7	0	0	81.2295	0	119.829	45.1535	78.7568	12.39	0.096414	324.969	27.0765	81.2466	-54.1701
Peptide deformylase 1	8	12	10	46	33	54	6	7	235.71	146.456	162.459	43.7646	275.608	165.563	265.804	12.39	0.145976	1295.36	181.542	235.658	-54.1166
Sulfur carrier protein ThiS	2	10	1	22	13	33	2	9	58.9275	122.046	16.2459	14.5882	131.812	65.2218	162.436	15.93	0.133875	571.278	65.74	119.823	-54.0834
HTH-type transcriptional activator HxlR	1	12	7	19	27	41		10	29.4638	146.456	113.721	0	113.838	135.461	201.814	17.7	0.143047	740.754	96.5469	150.371	-53.824
Histidine ammonia-lyase	2	7		12	25	22	1	5	58.9275	85.4325	0	7.29411	71.8976	125.426	108.291	8.85	0.0726695	457.269	48.12	101.872	-53.7515
Lactaldehyde reductase		2	1	17	8	12		1	0	24.4093	16.2459	0	101.855	40.1365	59.0676	1.77	0.0263293	241.714	13.5517	67.0197	-53.4679
RNA polymerase sigma factor CarQ		1		4	8	22		4	0	12.2046	0	0	23.9659	40.1365	108.291	7.08	0.0553837	184.598	4.06822	57.4643	-53.3961
Prolyl tripeptidyl peptidase		11		5	35	18		3	0	134.251	0	0	29.9573	175.597	88.6014	5.31	0.217789	428.407	44.7504	98.0519	-53.3016
D-alanine--D-alanine ligase A	3	8		22	25	18	1	2	88.3913	97.6372	0	7.29411	131.812	125.426	88.6014	3.54	0.0956347	539.163	62.0095	115.28	-53.2706
Putative conjugal transfer protein	5	4	3	40	19	14	1	4	147.319	48.8186	48.7377	7.29411	239.659	95.3241	68.9122	7.08	0.221763	656.064	81.625	134.632	-53.0067
Gluconate 5-dehydrogenase		2	1	10	20	8			0	24.4093	16.2459	0	59.9147	100.341	39.3784	0	0.0257674	240.289	13.5517	66.5448	-52.993
Urocanate hydratase	2	6		12	26	18	4	5	58.9275	73.2279	0	29.1764	71.8976	130.444	88.6014	8.85	0.0678008	452.274	44.0518	96.9809	-52.929
putative cobalt-factor III C(17)-methyltransferase			7	15	5	32		2	0	0	113.721	0	89.872	25.0853	157.514	3.54	0.190659	386.192	37.9071	90.8237	-52.9166
Periplasmic [Fe] hydrogenase large subunit	1	5		14	24	9	1	5	29.4638	61.0232	0	7.29411	83.8806	120.409	44.3007	8.85	0.0673384	346.372	30.1623	82.8636	-52.7012
ATP-dependent zinc metalloprotease FtsH 3	1	9	3	9	16	43	1	9	29.4638	109.842	48.7377	7.29411	53.9232	80.2729	211.659	15.93	0.194426	541.192	62.6811	115.285	-52.6039
Aspartate/alanine antiporter	9	20	2	42	51	39	2	9	265.174	244.093	32.4918	14.5882	251.642	255.87	191.97	15.93	0.266392	1255.83	180.586	233.16	-52.5743
Transcriptional regulatory protein DegU	7	18	6	35	39	56	5	6	206.246	219.684	97.4754	36.4705	209.701	195.665	275.649	10.62	0.158016	1240.89	174.468	227.005	-52.5367
Putative outer membrane protein	1	5		5	13	31		7	29.4638	61.0232	0	0	29.9573	65.2218	152.591	12.39	0.132511	338.257	30.1623	82.5901	-52.4278
7-carboxy-7-deazaguanine synthase	8	24	20	37	66	93	2	21	235.71	292.912	324.918	14.5882	221.684	331.126	457.774	37.17	0.25657	1878.71	284.513	336.861	-52.3482
Malto-oligosyltrehalose trehalohydrolase		1	1	6	18	12		1	0	12.2046	16.2459	0	35.9488	90.307	59.0676	1.77	0.0169107	213.774	9.48352	61.7745	-52.291
HTH-type transcriptional regulator CymR	2	10	3	28	23	21		3	58.9275	122.046	48.7377	0	167.761	115.392	103.368	5.31	0.0796521	616.233	76.5706	128.841	-52.27
Carbohydrate acetyl esterase/feruloyl esterase		6		10	28	6			0	73.2279	0	0	59.9147	140.478	29.5338	0	0.136465	303.154	24.4093	76.642	-52.2327
Glutamyl-tRNA(Gln) amidotransferase subunit A	5	5	11	25	53	26	1	9	147.319	61.0232	178.705	7.29411	149.787	265.904	127.98	15.93	0.199713	938.012	129.016	181.224	-52.2079
putative siderophore transport system ATP-binding protein YusV	4	12	12	34	35	48	3	9	117.855	146.456	194.951	21.8823	203.71	175.597	236.27	15.93	0.0708843	1096.72	153.087	205.192	-52.1053
L-serine dehydratase%2C alpha chain		3	9	26	12	25	1	3	0	36.6139	146.213	7.29411	155.778	60.2047	123.058	5.31	0.187128	529.162	60.9423	113.013	-52.0711
Branched-chain-amino-acid aminotransferase 2		1	7	18	19	16		6	0	12.2046	113.721	0	107.846	95.3241	78.7568	10.62	0.116392	407.853	41.9753	93.9758	-52.0005
Tyrosine-protein kinase CpsD		2		21	4	7		2	0	24.4093	0	0	125.821	20.0682	34.4561	3.54	0.101054	204.754	8.13643	60.1151	-51.9786
Endoglucanase A		2		5	27	3			0	24.4093	0	0	29.9573	135.461	14.7669	0	0.125989	204.594	8.13643	60.0616	-51.9252
Sensor histidine kinase YycG					31				0	0	0	0	0	155.529	0	0	0.18695	155.529	0	51.8429	-51.8429
Foldase protein PrsA		6	7	19	23	23	1	3	0	73.2279	113.721	7.29411	113.838	115.392	113.213	5.31	0.0972085	536.686	62.3164	114.148	-51.8313
Long-chain-fatty-acid--CoA ligase FadD13				11	9	9	1	2	0	0	0	7.29411	65.9061	45.1535	44.3007	3.54	0.000921302	162.654	0	51.7868	-51.7868
HTH-type transcriptional activator RhaS	11	29	2	49	65	50	7	8	324.101	353.935	32.4918	51.0587	293.582	326.109	246.115	14.16	0.324148	1627.39	236.843	288.602	-51.7593
Capsular polysaccharide phosphotransferase cps12A			1	8	5	20		2	0	0	16.2459	0	47.9317	25.0853	98.446	3.54	0.0407473	187.709	5.4153	57.1544	-51.7391
Dextranase			1	3	4	27		1	0	0	16.2459	0	17.9744	20.0682	132.902	1.77	0.124963	187.191	5.4153	56.9816	-51.5663
Cyclic-di-AMP phosphodiesterase PgpH	1	14	8	17	43	34		2	29.4638	170.865	129.967	0	101.855	215.733	167.358	3.54	0.194597	815.243	110.099	161.649	-51.5502
Putative mycofactocin radical SAM maturase MftC	2	7	7	25	21	32		4	58.9275	85.4325	113.721	0	149.787	105.358	157.514	7.08	0.0427761	670.74	86.0271	137.553	-51.5257
6-carboxy-5%2C6%2C7%2C8-tetrahydropterin synthase	4	8	7	27	19	46	3	8	117.855	97.6372	113.721	21.8823	161.77	95.3241	226.426	14.16	0.125452	834.615	109.738	161.173	-51.4354
Ferredoxin-type protein NapG	2	3	2	15	1	38		5	58.9275	36.6139	32.4918	0	89.872	5.01706	187.047	8.85	0.194851	409.97	42.6778	93.9788	-51.3011
1%2C4-alpha-glucan branching enzyme GlgB	17	23	20	67	74	99	7	23	500.884	280.707	324.918	51.0587	401.428	371.262	487.308	40.71	0.268092	2417.57	368.836	420	-51.1632
DNA topoisomerase 1	18	28	35	78	99	128	9	28	530.348	341.73	568.606	65.647	467.335	496.689	630.055	49.56	0.292417	3100.41	480.228	531.359	-51.1312
HTH-type transcriptional regulatory protein GabR	2	3		20	10	16	1	1	58.9275	36.6139	0	7.29411	119.829	50.1706	78.7568	1.77	0.0632568	351.592	31.8472	82.9189	-51.0718
Stage II sporulation protein E	1	13	14	36	37	34		10	29.4638	158.66	227.443	0	215.693	185.631	167.358	17.7	0.220454	984.249	138.522	189.561	-51.0385
Phenylalanine--tRNA ligase alpha subunit	15	29	28	56	103	112	5	23	441.956	353.935	454.885	36.4705	335.522	516.757	551.298	40.71	0.264689	2690.82	416.925	467.859	-50.9335
Sensor protein ZraS	5	6	5	21	38	28	4	1	147.319	73.2279	81.2295	29.1764	125.821	190.648	137.824	1.77	0.0869953	785.246	100.592	151.431	-50.8391
N-acetyl-alpha-D-glucosaminyl L-malate deacetylase 1		3		15	7	13		5	0	36.6139	0	0	89.872	35.1194	63.9899	8.85	0.0319034	225.595	12.2046	62.9938	-50.7891
Nucleoside permease NupG		4		7	16	16		1	0	48.8186	0	0	41.9403	80.2729	78.7568	1.77	0.034501	249.789	16.2729	66.99	-50.7171
Caffeyl-CoA reductase-Etf complex subunit CarE	8	20	17	41	78	55	1	9	235.71	244.093	276.18	7.29411	245.65	391.331	270.727	15.93	0.169539	1670.98	251.994	302.569	-50.5747
Ribulose-phosphate 3-epimerase	17	32	32	77	94	128	6	17	500.884	390.549	519.869	43.7646	461.343	471.603	630.055	30.09	0.248842	3018.07	470.434	521	-50.5666
tRNA-2-methylthio-N(6)-dimethylallyladenosine synthase	21	31	31	86	104	125	11	25	618.739	378.344	503.623	80.2352	515.266	521.774	615.288	44.25	0.272639	3233.27	500.235	550.776	-50.5407
putative oxidoreductase/MSMEI_2347		1	1	11	10	13		1	0	12.2046	16.2459	0	65.9061	50.1706	63.9899	1.77	0.000954119	208.517	9.48352	60.0222	-50.5387
Spore cortex-lytic enzyme	2	4	5	16	36	13		5	58.9275	48.8186	81.2295	0	95.8635	180.614	63.9899	8.85	0.117181	529.443	62.9919	113.489	-50.4973
Prolyl endopeptidase	4	7		22	15	30	2	8	117.855	85.4325	0	14.5882	131.812	75.2559	147.669	14.16	0.145115	572.613	67.7625	118.246	-50.4832
Arabinoxylan arabinofuranohydrolase		5	2	7	11	30		1	0	61.0232	32.4918	0	41.9403	55.1876	147.669	1.77	0.125686	338.312	31.1717	81.599	-50.4273
4-hydroxybenzoate solanesyltransferase		2		7	5	22		1	0	24.4093	0	0	41.9403	25.0853	108.291	1.77	0.0661614	199.725	8.13643	58.4387	-50.3023
Peroxide-responsive repressor PerR		5	7	21	23	17		3	0	61.0232	113.721	0	125.821	115.392	83.6791	5.31	0.114156	499.637	58.2482	108.297	-50.0493
Sulfur carrier protein adenylyltransferase		1		9	1	21		9	0	12.2046	0	0	53.9232	5.01706	103.368	15.93	0.0780095	174.513	4.06822	54.1029	-50.0347
NAD-dependent protein deacylase	4	10	2	24	32	24	1	6	117.855	122.046	32.4918	7.29411	143.795	160.546	118.135	10.62	0.0947082	702.164	90.7978	140.825	-50.0277
Signal peptidase I T		5	5	23	19	12		3	0	61.0232	81.2295	0	137.804	95.3241	59.0676	5.31	0.104295	434.448	47.4176	97.3985	-49.9809
Chaperone protein HtpG	7	21	24	52	66	73	14	35	206.246	256.298	389.902	102.117	311.556	331.126	359.328	61.95	0.213858	1956.57	284.148	334.003	-49.8549
Methionine import ATP-binding protein MetN 2	2	2		13	19	12		1	58.9275	24.4093	0	0	77.8891	95.3241	59.0676	1.77	0.0342224	315.618	27.7789	77.4269	-49.648
RNA polymerase sigma-F factor	3	6	10	29	41	19	1	6	88.3913	73.2279	162.459	7.29411	173.753	205.699	93.5237	10.62	0.15771	804.348	108.026	157.659	-49.6325
Putative ABC transporter substrate-binding protein YesO	1		1	20	4	11	1	1	29.4638	0	16.2459	7.29411	119.829	20.0682	54.1453	1.77	0.0901032	247.047	15.2366	64.681	-49.4444
Endonuclease YhcR		2		3	17	14			0	24.4093	0	0	17.9744	85.29	68.9122	0	0.0435672	196.586	8.13643	57.3922	-49.2558
Negative regulator of genetic competence ClpC/MecB	1	2	2	9	28	8	1	3	29.4638	24.4093	32.4918	7.29411	53.9232	140.478	39.3784	5.31	0.0977097	327.438	28.7883	77.9264	-49.1381
LexA repressor	4	15	20	39	84	24	5	11	117.855	183.07	324.918	36.4705	233.667	421.433	118.135	19.47	0.335622	1435.55	208.614	257.745	-49.1309
tRNA-Pro(ggg)	3	7	11	27	35	33	2	10	88.3913	85.4325	178.705	14.5882	161.77	175.597	162.436	17.7	0.0938824	866.92	117.51	166.601	-49.0913
putative parvulin-type peptidyl-prolyl cis-trans isomerase	1	3	1	7	3	35		1	29.4638	36.6139	16.2459	0	41.9403	15.0512	172.281	1.77	0.186666	311.596	27.4412	76.424	-48.9828
Fumarate reductase iron-sulfur subunit	3	4	4	16	23	28	3	9	88.3913	48.8186	64.9836	21.8823	95.8635	115.392	137.824	15.93	0.0213701	573.156	67.3978	116.36	-48.9623
ECF RNA polymerase sigma factor SigR	2	2	1	17	17	12			58.9275	24.4093	16.2459	0	101.855	85.29	59.0676	0	0.0268809	345.795	33.1942	82.0709	-48.8766
Trifunctional nucleotide phosphoesterase protein YfkN	4	17	4	23	51	29	1	6	117.855	207.479	64.9836	7.29411	137.804	255.87	142.747	10.62	0.219451	934.032	130.106	178.807	-48.7009
Putative anti-sigma factor antagonist BtrV	2	1	9	30	13	24		8	58.9275	12.2046	146.213	0	179.744	65.2218	118.135	14.16	0.19884	580.446	72.4484	121.034	-48.5853
Cobalt-precorrin-2 C(20)-methyltransferase			4	17	5	17		2	0	0	64.9836	0	101.855	25.0853	83.6791	3.54	0.100289	275.603	21.6612	70.2065	-48.5453
Electron transport complex subunit RsxG	11	16	13	40	67	61	4	14	324.101	195.274	211.197	29.1764	239.659	336.143	300.26	24.78	0.190766	1635.81	243.524	292.021	-48.4965
UDP-galactopyranose mutase	3	3	14	39	20	33		9	88.3913	36.6139	227.443	0	233.667	100.341	162.436	15.93	0.261834	848.892	117.483	165.481	-47.9989
Aminodeoxychorismate/anthranilate synthase component 2	1	10	8	19	16	47	1	8	29.4638	122.046	129.967	7.29411	113.838	80.2729	231.348	14.16	0.219955	714.231	93.8258	141.82	-47.9939
Alpha-D-kanosaminyltransferase	1	10	4	22	23	23		7	29.4638	122.046	64.9836	0	131.812	115.392	113.213	12.39	0.0785717	576.911	72.1646	120.139	-47.9746
Sensor histidine kinase ComP		3		7	6	22		1	0	36.6139	0	0	41.9403	30.1023	108.291	1.77	0.0766131	216.947	12.2046	60.1111	-47.9064
Bifunctional NAD(P)H-hydrate repair enzyme Nnr	4	13	4	31	37	23		3	117.855	158.66	64.9836	0	185.736	185.631	113.213	5.31	0.129678	826.079	113.833	161.527	-47.6935
DNA polymerase III PolC-type	25	50	18	103	141	93	8	20	736.594	610.232	292.426	58.3528	617.121	707.405	457.774	35.4	0.383939	3479.91	546.418	594.1	-47.6826
ATPase RavA	4	7	2	21	20	31		3	117.855	85.4325	32.4918	0	125.821	100.341	152.591	5.31	0.0883774	614.533	78.5931	126.251	-47.658
Solvent efflux pump periplasmic linker SrpA	4	14	2	23	14	52		6	117.855	170.865	32.4918	0	137.804	70.2388	255.96	10.62	0.26011	785.214	107.071	154.667	-47.5968
Mannonate dehydratase	8	11	13	44	26	67	1	12	235.71	134.251	211.197	7.29411	263.625	130.444	329.794	21.24	0.255808	1312.31	193.719	241.287	-47.5681
3-methylmercaptopropionyl-CoA dehydrogenase	2	2		7	20	17	1	1	58.9275	24.4093	0	7.29411	41.9403	100.341	83.6791	1.77	0.0614217	316.591	27.7789	75.3202	-47.5412
Hydrogenase-4 component B		4	6	21	5	28		4	0	48.8186	97.4754	0	125.821	25.0853	137.824	7.08	0.177786	435.025	48.7647	96.2435	-47.4789
Ribose import binding protein RbsB	3	3	5	35	12	16	1	2	88.3913	36.6139	81.2295	7.29411	209.701	60.2047	78.7568	3.54	0.197015	562.192	68.7449	116.221	-47.4761
putative HTH-type transcriptional repressor ExuR	3	5	7	37	16	21		5	88.3913	61.0232	113.721	0	221.684	80.2729	103.368	8.85	0.182233	668.461	87.7119	135.109	-47.3966
2-amino-4-deoxychorismate dehydrogenase		6	2	18	23	5		3	0	73.2279	32.4918	0	107.846	115.392	24.6115	5.31	0.129154	353.57	35.2399	82.6168	-47.3769
Protein oar		2	1	5	2	29		1	0	24.4093	16.2459	0	29.9573	10.0341	142.747	1.77	0.160949	223.393	13.5517	60.9127	-47.361
3-oxoacyl-[acyl-carrier-protein] synthase 2	13	23	27	55	97	87	6	27	383.029	280.707	438.639	43.7646	329.531	486.655	428.24	47.79	0.253735	2390.57	367.458	414.809	-47.3502
Translocation-enhancing protein TepA		7	5	20	19	19		2	0	85.4325	81.2295	0	119.829	95.3241	93.5237	3.54	0.0893781	475.339	55.554	102.892	-47.3384
Exopolyphosphatase 1		2		8	3	21			0	24.4093	0	0	47.9317	15.0512	103.368	0	0.0774378	190.761	8.13643	55.4504	-47.314
Dipicolinate synthase subunit B		2	4	17	15	11		2	0	24.4093	64.9836	0	101.855	75.2559	54.1453	3.54	0.0569475	320.649	29.7976	77.0854	-47.2878
IgA FC receptor		2		17		13		3	0	24.4093	0	0	101.855	0	63.9899	5.31	0.100399	190.254	8.13643	55.2816	-47.1452
Deoxyribose-phosphate aldolase 2		4		16	6	13		1	0	48.8186	0	0	95.8635	30.1023	63.9899	1.77	0.0665342	238.774	16.2729	63.3186	-47.0457
tRNA-Arg(acg)	9	29	12	58	69	53	3	23	265.174	353.935	194.951	21.8823	347.505	346.177	260.882	40.71	0.21811	1790.51	271.353	318.188	-46.8349
General stress protein 69					28		2		0	0	0	14.5882	0	140.478	0	0	0.18695	155.066	0	46.8259	-46.8259
Transcriptional regulatory protein YycF					28		2		0	0	0	14.5882	0	140.478	0	0	0.18695	155.066	0	46.8259	-46.8259
Prephenate dehydrogenase					26	2			0	0	0	0	0	130.444	9.8446	0	0.163645	140.288	0	46.7627	-46.7627
Quinolinate synthase A	5	22	12	30	54	61	2	10	147.319	268.502	194.951	14.5882	179.744	270.921	300.26	17.7	0.204001	1376.29	203.591	250.309	-46.7179
L-cystine transport system permease protein TcyB	2	3	2	14	23	14		7	58.9275	36.6139	32.4918	0	83.8806	115.392	68.9122	12.39	0.0215103	396.218	42.6778	89.395	-46.7173
FKBP-type peptidyl-prolyl cis-trans isomerase SlyD	8	14	10	24	42	72	2	11	235.71	170.865	162.459	14.5882	143.795	210.716	354.406	19.47	0.260329	1292.54	189.678	236.306	-46.6278
Toluene efflux pump periplasmic linker protein TtgG		3	1	9	5	23		2	0	36.6139	16.2459	0	53.9232	25.0853	113.213	3.54	0.086344	245.081	17.6199	64.0738	-46.4539
Serine/threonine-protein kinase PknB	1	3	3	20	15	12	2	8	29.4638	36.6139	48.7377	14.5882	119.829	75.2559	59.0676	14.16	0.0355206	383.556	38.2718	84.7176	-46.4458
Protein LacX%2C plasmid	6	10	13	49	9	63	1	17	176.783	122.046	211.197	7.29411	293.582	45.1535	310.105	30.09	0.31629	1166.16	170.009	216.28	-46.2716
Stage V sporulation protein AD	3	8	12	27	38	34	1	5	88.3913	97.6372	194.951	7.29411	161.77	190.648	167.358	8.85	0.129581	908.049	126.993	173.259	-46.2656
Energy-coupling factor transporter ATP-binding protein EcfA2	5	13	26	50	66	48	3	13	147.319	158.66	422.393	21.8823	299.573	331.126	236.27	23.01	0.324569	1617.22	242.791	288.99	-46.199
Nucleoside triphosphate pyrophosphohydrolase/pyrophosphatase MazG	1			9	9	14		2	29.4638	0	0	0	53.9232	45.1535	68.9122	3.54	0.00922729	197.453	9.82125	55.9963	-46.1751
Bifunctional (p)ppGpp synthase/hydrolase RelA		3	1	12	13	11		5	0	36.6139	16.2459	0	71.8976	65.2218	54.1453	8.85	0.00867273	244.125	17.6199	63.7549	-46.1349
Aspartate carbamoyltransferase catalytic chain		1			30				0	12.2046	0	0	0	150.512	0	0	0.205769	162.716	4.06822	50.1706	-46.1024
Glycerol-3-phosphate dehydrogenase [NAD(P)+]	12	27	27	71	77	91	2	15	353.565	329.525	438.639	14.5882	425.394	386.313	447.929	26.55	0.144727	2395.96	373.91	419.879	-45.9691
Inner membrane protein YohK	4	20	4	23	37	49		6	117.855	244.093	64.9836	0	137.804	185.631	241.193	10.62	0.246667	991.559	142.311	188.209	-45.8987
Na(+)/H(+) antiporter ApNhaP		1	1	3	5	25	1	3	0	12.2046	16.2459	7.29411	17.9744	25.0853	123.058	5.31	0.125704	201.862	9.48352	55.3724	-45.8889
HTH-type transcriptional regulator YesS	5	18	8	52	31	34		9	147.319	219.684	129.967	0	311.556	155.529	167.358	15.93	0.233921	1131.41	165.657	211.481	-45.8246
Cold shock-like protein		1	2	13	6	15		5	0	12.2046	32.4918	0	77.8891	30.1023	73.8345	8.85	0.0319856	226.522	14.8988	60.6087	-45.7098
N-alpha-acetyl-L-2%2C4-diaminobutyric acid deacetylase	9	11	7	45	15	62	6	8	265.174	134.251	113.721	43.7646	269.616	75.2559	305.183	14.16	0.311421	1206.97	171.049	216.685	-45.6361
Exopolyphosphatase 2		2	1	9	2	23		4	0	24.4093	16.2459	0	53.9232	10.0341	113.213	7.08	0.106473	217.825	13.5517	59.0568	-45.505
Glycogen biosynthesis protein GlgD	1	4	8	16	29	21	1	6	29.4638	48.8186	129.967	7.29411	95.8635	145.495	103.368	10.62	0.128537	560.27	69.4165	114.909	-45.4923
Zinc D-Ala-D-Ala carboxypeptidase		4	1	13	6	19		4	0	48.8186	16.2459	0	77.8891	30.1023	93.5237	7.08	0.0647271	266.58	21.6882	67.1717	-45.4836
K(+)/H(+) antiporter NhaP2	1	7	5	20	11	32		1	29.4638	85.4325	81.2295	0	119.829	55.1876	157.514	1.77	0.131174	528.656	65.3753	110.844	-45.4683
Tyrosine-protein kinase wzc	4	7	2	24	16	30	2	7	117.855	85.4325	32.4918	14.5882	143.795	80.2729	147.669	12.39	0.121456	622.105	78.5931	123.912	-45.3193
Immunoglobulin A1 protease		2		2	7	23		1	0	24.4093	0	0	11.9829	35.1194	113.213	1.77	0.113015	184.725	8.13643	53.4384	-45.302
Putative sugar phosphate isomerase YwlF	3	6	9	24	42	18		4	88.3913	73.2279	146.213	0	143.795	210.716	88.6014	7.08	0.17031	750.945	102.611	147.704	-45.0936
Esterase EstA		1		9		19		1	0	12.2046	0	0	53.9232	0	93.5237	1.77	0.0876711	159.652	4.06822	49.149	-45.0808
Lysine--tRNA ligase%2C heat inducible	4	10	7	22	26	46	5	10	117.855	122.046	113.721	36.4705	131.812	130.444	226.426	17.7	0.115254	878.775	117.874	162.894	-45.0196
Periplasmic serine endoprotease DegP	6	7	9	22	32	51	4	8	176.783	85.4325	146.213	29.1764	131.812	160.546	251.037	14.16	0.186271	981	136.143	181.132	-44.9891
Hydrogen cyanide synthase subunit HcnB		3	5	13	25	10		1	0	36.6139	81.2295	0	77.8891	125.426	49.223	1.77	0.118636	370.382	39.2811	84.1795	-44.8984
putative epimerase/dehydratase		9		15	14	17	1	5	0	109.842	0	7.29411	89.872	70.2388	83.6791	8.85	0.1474	360.926	36.6139	81.2633	-44.6494
HTH-type transcriptional repressor KstR2	2	3	1	12	16	19			58.9275	36.6139	16.2459	0	71.8976	80.2729	93.5237	0	0.0160625	357.482	37.2625	81.8981	-44.6356
ATP-dependent Clp protease proteolytic subunit 1		5	2	9	10	25	1	6	0	61.0232	32.4918	7.29411	53.9232	50.1706	123.058	10.62	0.102983	327.96	31.1717	75.7171	-44.5454
putative metal-dependent hydrolase YjjV	3	5	6	18	17	38	2	3	88.3913	61.0232	97.4754	14.5882	107.846	85.29	187.047	5.31	0.12315	641.662	82.2966	126.728	-44.4313
Inositol 2-dehydrogenase		1		6	11	11	1	2	0	12.2046	0	7.29411	35.9488	55.1876	54.1453	3.54	0.00200085	164.781	4.06822	48.4273	-44.359
Propionyl-CoA:succinate CoA transferase		4		2	25	9			0	48.8186	0	0	11.9829	125.426	44.3007	0	0.151258	230.529	16.2729	60.57	-44.2972
Protein TolQ	13	21	12	60	22	101	1	18	383.029	256.298	194.951	7.29411	359.488	110.375	497.152	31.86	0.371599	1808.59	278.092	322.339	-44.2462
Phosphate acyltransferase	14	27	29	73	80	103	6	18	412.493	329.525	471.131	43.7646	437.377	401.365	506.997	31.86	0.219443	2602.65	404.383	448.58	-44.1966
Galactoside transport system permease protein MglC	3		4	22	15	16	1	4	88.3913	0	64.9836	7.29411	131.812	75.2559	78.7568	7.08	0.120833	446.494	51.125	95.275	-44.15
Carbamate kinase 1			2	20	7	2		2	0	0	32.4918	0	119.829	35.1194	9.8446	3.54	0.137955	197.285	10.8306	54.9311	-44.1005
Putative agmatine deiminase		1	1	11	11	8		1	0	12.2046	16.2459	0	65.9061	55.1876	39.3784	1.77	0.00424801	188.923	9.48352	53.4907	-44.0072
Fumarate hydratase class I%2C aerobic	3	10	8	34	28	26	3	4	88.3913	122.046	129.967	21.8823	203.71	140.478	127.98	7.08	0.087538	834.455	113.468	157.389	-43.9208
Outer membrane protein 41		3		14	5	12		3	0	36.6139	0	0	83.8806	25.0853	59.0676	5.31	0.0524208	204.647	12.2046	56.0112	-43.8065
Sec-independent protein translocase protein TatAy		4		11	10	13		1	0	48.8186	0	0	65.9061	50.1706	63.9899	1.77	0.0309298	228.885	16.2729	60.0222	-43.7494
HTH-type transcriptional activator CmpR	4	12	2	30	23	27		1	117.855	146.456	32.4918	0	179.744	115.392	132.902	1.77	0.163766	724.841	98.9342	142.68	-43.7453
Amidase enhancer	4	2	11	23	45	18	3	2	117.855	24.4093	178.705	21.8823	137.804	225.768	88.6014	3.54	0.253859	795.024	106.99	150.724	-43.7345
1%2C5-anhydro-D-fructose reductase	2	1	1	9	23	10	1	1	58.9275	12.2046	16.2459	7.29411	53.9232	115.392	49.223	1.77	0.0841928	313.211	29.126	72.8462	-43.7202
putative cysteine desulfurase	2	13	5	26	34	21		3	58.9275	158.66	81.2295	0	155.778	170.58	103.368	5.31	0.148706	728.544	99.6058	143.242	-43.6363
50S ribosomal protein L19	11	19	17	42	78	65	6	18	324.101	231.888	276.18	43.7646	251.642	391.331	319.95	31.86	0.209056	1838.86	277.39	320.974	-43.584
Ketol-acid reductoisomerase					26		2		0	0	0	14.5882	0	130.444	0	0	0.18695	145.032	0	43.4812	-43.4812
Transcriptional regulatory protein YehT					26		1		0	0	0	7.29411	0	130.444	0	0	0.18695	137.738	0	43.4812	-43.4812
Alternate 30S ribosomal protein S14		4		5	16	14		2	0	48.8186	0	0	29.9573	80.2729	68.9122	3.54	0.061567	227.961	16.2729	59.7142	-43.4413
Inner membrane protein YgaZ	2	4	2	21	17	12	1	1	58.9275	48.8186	32.4918	7.29411	125.821	85.29	59.0676	1.77	0.0533997	417.71	46.746	90.0595	-43.3135
N-acetylmuramoyl-L-alanine amidase AmiC	2	5	3	15	21	21			58.9275	61.0232	48.7377	0	89.872	105.358	103.368	0	0.00108491	467.287	56.2295	99.5329	-43.3034
Aminodeoxychorismate synthase component 2	4	5	6	29	12	35	1	6	117.855	61.0232	97.4754	7.29411	173.753	60.2047	172.281	10.62	0.175877	689.886	92.1179	135.413	-43.2947
Nucleotide-binding protein	1	3	4	16	19	14		2	29.4638	36.6139	64.9836	0	95.8635	95.3241	68.9122	3.54	0.0187134	391.161	43.6871	86.6999	-43.0128
Nucleoid-associated protein	6	12	12	34	57	32	1	8	176.783	146.456	194.951	7.29411	203.71	285.972	157.514	14.16	0.172193	1172.68	172.73	215.732	-43.0023
NADPH-Fe(3+) oxidoreductase subunit beta	3	6	2	19	25	17	5	1	88.3913	73.2279	32.4918	36.4705	113.838	125.426	83.6791	1.77	0.0540503	553.525	64.7037	107.648	-42.9442
Capsule biosynthesis protein CapA	2	9	15	38	35	28	1	3	58.9275	109.842	243.688	7.29411	227.676	175.597	137.824	5.31	0.260243	960.849	137.486	180.366	-42.8798
Thioredoxin-1		1			28		3		0	12.2046	0	21.8823	0	140.478	0	0	0.207221	174.565	4.06822	46.8259	-42.7577
Mannose-1-phosphate guanylyltransferase 1		3	2	13	9	15	2	9	0	36.6139	32.4918	14.5882	77.8891	45.1535	73.8345	15.93	0.0257415	280.571	23.0352	65.6257	-42.5905
Cellulose synthase catalytic subunit [UDP-forming]	2	9		37	9	6	2	1	58.9275	109.842	0	14.5882	221.684	45.1535	29.5338	1.77	0.286293	479.729	56.2564	98.7906	-42.5341
Putative acetyltransferase YjbC		4	2	10	13	17		1	0	48.8186	32.4918	0	59.9147	65.2218	83.6791	1.77	0.0285674	290.126	27.1035	69.6052	-42.5017
Pur operon repressor		1		10	10	6	1	1	0	12.2046	0	7.29411	59.9147	50.1706	29.5338	1.77	0.00623545	159.118	4.06822	46.5397	-42.4715
Sensor protein FixL		3	1	6	16	13	1	3	0	36.6139	16.2459	7.29411	35.9488	80.2729	63.9899	5.31	0.0320565	240.366	17.6199	60.0706	-42.4506
Phosphoribosyl-ATP pyrophosphatase		1	4	15	13	10		1	0	12.2046	64.9836	0	89.872	65.2218	49.223	1.77	0.0707804	281.505	25.7294	68.1056	-42.3762
Ribose-phosphate pyrophosphokinase	14	31	26	67	89	100	11	18	412.493	378.344	422.393	80.2352	401.428	446.518	492.23	31.86	0.111819	2633.64	404.41	446.726	-42.3155
Serine protease AprX	2	4	1	11	30	7	2	1	58.9275	48.8186	16.2459	14.5882	65.9061	150.512	34.4561	1.77	0.15821	389.454	41.3307	83.6247	-42.294
Tropinesterase		6		2	11	27	1	2	0	73.2279	0	7.29411	11.9829	55.1876	132.902	3.54	0.190471	280.595	24.4093	66.6909	-42.2816
Precorrin-2 C(20)-methyltransferase				3	1	21		1	0	0	0	0	17.9744	5.01706	103.368	1.77	0.12196	126.36	0	42.1199	-42.1199
2%2C3-bisphosphoglycerate-independent phosphoglycerate mutase	11	30	31	60	106	87	5	17	324.101	366.139	503.623	36.4705	359.488	531.808	428.24	30.09	0.300323	2549.87	397.955	439.845	-41.8909
2-keto-3-deoxy-L-rhamnonate aldolase		1	1	10	6	13		4	0	12.2046	16.2459	0	59.9147	30.1023	63.9899	7.08	0.0117568	182.457	9.48352	51.3356	-41.8521
Transcriptional repressor NrdR	7	9	9	39	46	25	2	6	206.246	109.842	146.213	14.5882	233.667	230.785	123.058	10.62	0.207727	1064.4	154.1	195.836	-41.7361
PGL/p-HBAD biosynthesis glycosyltransferase		11	2	18	19	18	1	5	0	134.251	32.4918	7.29411	107.846	95.3241	88.6014	8.85	0.182543	465.809	55.581	97.2573	-41.6763
GDP-mannose-dependent alpha-(1-6)-phosphatidylinositol monomannoside mannosyltransferase	1	2	2	13	6	21		3	29.4638	24.4093	32.4918	0	77.8891	30.1023	103.368	5.31	0.0630068	297.725	28.7883	70.4533	-41.665
LOG family protein YvdD		5	1	2	33	5		1	0	61.0232	16.2459	0	11.9829	165.563	24.6115	1.77	0.236083	279.426	25.7564	67.3858	-41.6294
EtfAB:quinone oxidoreductase		1		8	2	16		2	0	12.2046	0	0	47.9317	10.0341	78.7568	3.54	0.05509	148.927	4.06822	45.5742	-41.506
Glycosyl hydrolase family 109 protein 1		8		8	13	22			0	97.6372	0	0	47.9317	65.2218	108.291	0	0.164537	319.081	32.5457	73.8147	-41.269
Voltage-gated ClC-type chloride channel ClcB		1		2	10	15		1	0	12.2046	0	0	11.9829	50.1706	73.8345	1.77	0.0446206	148.193	4.06822	45.3293	-41.2611
S-ribosylhomocysteine lyase	4	6	7	31	15	34	2	11	117.855	73.2279	113.721	14.5882	185.736	75.2559	167.358	19.47	0.164178	747.742	101.601	142.783	-41.1818
3-hydroxy-5-phosphonooxypentane-2%2C4-dione thiolase		8	3	17	6	28		6	0	97.6372	48.7377	0	101.855	30.1023	137.824	10.62	0.193402	416.157	48.7916	89.9272	-41.1356
Imidazoleglycerol-phosphate dehydratase		7	1	15	18	9			0	85.4325	16.2459	0	89.872	90.307	44.3007	0	0.12414	326.158	33.8928	74.8266	-40.9338
Phosphoglucomutase	15	27	34	93	88	91	9	26	441.956	329.525	552.361	65.647	557.207	441.501	447.929	46.02	0.305934	2836.13	441.281	482.212	-40.9316
Putative bifunctional phosphatase/peptidyl-prolyl cis-trans isomerase	2	19	3	17	56	16	2	4	58.9275	231.888	48.7377	14.5882	101.855	280.955	78.7568	7.08	0.3327	815.709	113.185	153.856	-40.6712
Glutaredoxin arsenate reductase			2	4	24	2	1	1	0	0	32.4918	7.29411	23.9659	120.409	9.8446	1.77	0.163656	194.006	10.8306	51.4066	-40.576
ATP-dependent RNA helicase DbpA	7	18	7	39	46	40	10	12	206.246	219.684	113.721	72.9411	233.667	230.785	196.892	21.24	0.157503	1273.94	179.884	220.448	-40.5642
Arsenical resistance operon repressor	1	6	3	24	14	12		1	29.4638	73.2279	48.7377	0	143.795	70.2388	59.0676	1.77	0.120186	424.531	50.4764	91.0339	-40.5574
Ribosome-binding ATPase YchF	15	24	30	60	101	97	4	28	441.956	292.912	487.377	29.1764	359.488	506.723	477.463	49.56	0.30672	2595.1	407.415	447.891	-40.4764
Aspartokinase 3		6	6	12	34	10		1	0	73.2279	97.4754	0	71.8976	170.58	49.223	1.77	0.221357	462.404	56.9011	97.2335	-40.3324
HTH-type transcriptional regulator MlrA		4	2	4	11	25		5	0	48.8186	32.4918	0	23.9659	55.1876	123.058	8.85	0.141877	283.521	27.1035	67.4037	-40.3002
L-Rhamnulokinase		1		9	2	14		3	0	12.2046	0	0	53.9232	10.0341	68.9122	5.31	0.0453709	145.074	4.06822	44.2898	-40.2216
Bicarbonate transport ATP-binding protein CmpD		5	3	21	11	10	1	2	0	61.0232	48.7377	7.29411	125.821	55.1876	49.223	3.54	0.13153	347.287	36.587	76.7438	-40.1569
Cobalt-dependent inorganic pyrophosphatase	1	1	5	19	14	12	1	1	29.4638	12.2046	81.2295	7.29411	113.838	70.2388	59.0676	1.77	0.103388	373.336	40.966	81.0481	-40.0821
ABC transporter periplasmic-binding protein YtfQ		1		13	2	9			0	12.2046	0	0	77.8891	10.0341	44.3007	0	0.0580792	144.429	4.06822	44.0746	-40.0064
Non-reducing end alpha-L-arabinofuranosidase BoGH43A		5		7	10	18		1	0	61.0232	0	0	41.9403	50.1706	88.6014	1.77	0.0922519	241.736	20.3411	60.2374	-39.8963
Imidazolonepropionase	5	5	5	15	43	21	3	7	147.319	61.0232	81.2295	21.8823	89.872	215.733	103.368	12.39	0.225282	720.428	96.5238	136.325	-39.8008
Aldo/keto reductase		9	3	9	26	19		2	0	109.842	48.7377	0	53.9232	130.444	93.5237	3.54	0.181105	436.47	52.8598	92.6301	-39.7703
Serine/threonine phosphatase stp	1	9	9	30	36	9	1	4	29.4638	109.842	146.213	7.29411	179.744	180.614	44.3007	7.08	0.261934	697.472	95.1729	134.886	-39.7134
Alanine--tRNA ligase	17	32	34	75	112	112	6	19	500.884	390.549	552.361	43.7646	449.36	561.91	551.298	33.63	0.271778	3050.13	481.264	520.856	-39.5917
Chondroitinase-B	2	8	5	19	14	35	1	3	58.9275	97.6372	81.2295	7.29411	113.838	70.2388	172.281	5.31	0.139724	601.446	79.2647	118.786	-39.521
Putative nuclease YhcG	2	10	9	33	19	31		5	58.9275	122.046	146.213	0	197.718	95.3241	152.591	8.85	0.186675	772.821	109.062	148.545	-39.4823
Pyruvate/proton symporter BtsT	1	3	2	9	6	27		5	29.4638	36.6139	32.4918	0	53.9232	30.1023	132.902	8.85	0.136934	315.497	32.8565	72.3092	-39.4527
Sporulation protein YpeB		2		3	18	7		3	0	24.4093	0	0	17.9744	90.307	34.4561	5.31	0.0832299	167.147	8.13643	47.5792	-39.4428
N-alpha-acetyltransferase RimI				9	3	10		1	0	0	0	0	53.9232	15.0512	49.223	1.77	0.0161952	118.197	0	39.3991	-39.3991
UDP-2-acetamido-2%2C6-beta-L-arabino-hexul-4-ose reductase	2	1	2	13	11	18	1	4	58.9275	12.2046	32.4918	7.29411	77.8891	55.1876	88.6014	7.08	0.0391854	332.596	34.5413	73.8927	-39.3514
Phosphoribosylformylglycinamidine synthase subunit PurL		3	3	9	14	16		4	0	36.6139	48.7377	0	53.9232	70.2388	78.7568	7.08	0.0373704	288.27	28.4505	67.6396	-39.1891
Tyrosine--tRNA ligase 1	1	4		6	23	9	1	3	29.4638	48.8186	0	7.29411	35.9488	115.392	44.3007	5.31	0.123824	281.218	26.0941	65.214	-39.1198
Inner membrane symporter YicJ				2	17	4		1	0	0	0	0	11.9829	85.29	19.6892	1.77	0.0844931	116.962	0	38.9874	-38.9874
Cobalt-precorrin-8 methylmutase		1	3	9	9	16		3	0	12.2046	48.7377	0	53.9232	45.1535	78.7568	5.31	0.0466852	238.776	20.3141	59.2779	-38.9637
Ribosome-binding factor A	7	18	15	33	82	36	7	8	206.246	219.684	243.688	51.0587	197.718	411.399	177.203	14.16	0.317162	1507	223.206	262.107	-38.9005
Methylthioribose-1-phosphate isomerase		1	2	7	13	11	2	2	0	12.2046	32.4918	14.5882	41.9403	65.2218	54.1453	3.54	0.0143446	220.592	14.8988	53.7691	-38.8703
Coenzyme PQQ synthesis protein B		2	3	7	1	29		1	0	24.4093	48.7377	0	41.9403	5.01706	142.747	1.77	0.211118	262.851	24.3823	63.2347	-38.8524
Tryptophan 2-C-methyltransferase		1		4	13	8		2	0	12.2046	0	0	23.9659	65.2218	39.3784	3.54	0.018959	140.771	4.06822	42.8553	-38.7871
Ribonuclease Z	6	15	2	36	26	33	2	3	176.783	183.07	32.4918	14.5882	215.693	130.444	162.436	5.31	0.260392	915.505	130.781	169.524	-38.7427
Sec-independent protein translocase protein TatA	5	9	6	29	18	42	4	12	147.319	109.842	97.4754	29.1764	173.753	90.307	206.737	21.24	0.181495	854.609	118.212	156.932	-38.7201
5-keto-D-gluconate 5-reductase		11	8	23	12	37		12	0	134.251	129.967	0	137.804	60.2047	182.125	21.24	0.266356	644.352	88.0728	126.711	-38.6384
Mannitol-specific phosphotransferase enzyme IIA component	2			16	2	14	1	2	58.9275	0	0	7.29411	95.8635	10.0341	68.9122	3.54	0.147354	241.031	19.6425	58.2699	-38.6274
Glutarate-semialdehyde dehydrogenase DavD		5	2	15	13	11	1	1	0	61.0232	32.4918	7.29411	89.872	65.2218	54.1453	1.77	0.0668525	310.048	31.1717	69.7464	-38.5747
Cytochrome c-552	4	1	6	21	9	35	4	6	117.855	12.2046	97.4754	29.1764	125.821	45.1535	172.281	10.62	0.238675	599.966	75.845	114.418	-38.5733
Glucose--fructose oxidoreductase	2			10	15	8	1		58.9275	0	0	7.29411	59.9147	75.2559	39.3784	0	0.078944	240.771	19.6425	58.183	-38.5405
Pyridoxine/pyridoxal/pyridoxamine kinase		4	4	15	17	11		2	0	48.8186	64.9836	0	89.872	85.29	54.1453	3.54	0.0813064	343.11	37.9341	76.4358	-38.5017
DNA-damage-inducible protein F					23		4		0	0	0	29.1764	0	115.392	0	0	0.18695	144.569	0	38.4641	-38.4641
Transcriptional activator NphR	2			15	7	10			58.9275	0	0	0	89.872	35.1194	49.223	0	0.103842	233.142	19.6425	58.0715	-38.429
Oxygen-insensitive NADPH nitroreductase		3	1	9	10	13			0	36.6139	16.2459	0	53.9232	50.1706	63.9899	0	0.0139069	220.944	17.6199	56.0279	-38.408
Spermidine/spermine N(1)-acetyltransferase		1	1	9	12	6		2	0	12.2046	16.2459	0	53.9232	60.2047	29.5338	3.54	0.0109876	172.112	9.48352	47.8872	-38.4037
D-alanine--poly(phosphoribitol) ligase subunit 2		2	3	19	5	10			0	24.4093	48.7377	0	113.838	25.0853	49.223	0	0.13521	261.293	24.3823	62.7154	-38.3331
Octaprenyl diphosphate synthase	5	6	2	21	10	39	1	8	147.319	73.2279	32.4918	7.29411	125.821	50.1706	191.97	14.16	0.254863	628.294	84.3462	122.654	-38.3076
Antibiotic efflux pump membrane transporter ArpB		2		10	3	13		3	0	24.4093	0	0	59.9147	15.0512	63.9899	5.31	0.0483553	163.365	8.13643	46.3186	-38.1822
dTDP-4-amino-4%2C6-dideoxy-D-glucose transaminase		2	7	14	13	21		3	0	24.4093	113.721	0	83.8806	65.2218	103.368	5.31	0.176356	390.601	46.0435	84.1569	-38.1134
N-acetyl-alpha-D-glucosaminyl-diphospho-ditrans%2Coctacis-undecaprenol 4-epimerase		7	1	11	18	12			0	85.4325	16.2459	0	65.9061	90.307	59.0676	0	0.122806	316.959	33.8928	71.7603	-37.8675
Urease accessory protein UreH		3	8	13	5	36		1	0	36.6139	129.967	0	77.8891	25.0853	177.203	1.77	0.278092	446.758	55.527	93.3924	-37.8654
Inner membrane protein YbaN	6	7	14	32	31	52	2	9	176.783	85.4325	227.443	14.5882	191.727	155.529	255.96	15.93	0.24912	1107.46	163.219	201.072	-37.8526
Polyphosphate:AMP phosphotransferase		1		11	6	6		1	0	12.2046	0	0	65.9061	30.1023	29.5338	1.77	0.0204744	137.747	4.06822	41.8474	-37.7792
Phosphoribosylglycinamide formyltransferase 2				3	19				0	0	0	0	17.9744	95.3241	0	0	0.133059	113.299	0	37.7662	-37.7662
Xylose operon regulatory protein	1	5	2	8	13	25			29.4638	61.0232	32.4918	0	47.9317	65.2218	123.058	0	0.101638	359.19	40.9929	78.737	-37.7441
Heparin-sulfate lyase		1		6	5	13			0	12.2046	0	0	35.9488	25.0853	63.9899	0	0.0187997	137.229	4.06822	41.6747	-37.6065
Pyridoxal phosphate homeostasis protein	9	22	17	59	31	84	2	19	265.174	268.502	276.18	14.5882	353.497	155.529	413.473	33.63	0.327701	1746.94	269.952	307.5	-37.5475
Sorbitol operon regulator				13		7			0	0	0	0	77.8891	0	34.4561	0	0.0859406	112.345	0	37.4484	-37.4484
Stage 0 sporulation protein A	5	8	14	36	49	25	1	13	147.319	97.6372	227.443	7.29411	215.693	245.836	123.058	23.01	0.259176	1064.28	157.466	194.862	-37.3959
UDP-2%2C3-diacetamido-2%2C3-dideoxy-D-glucuronate 2-epimerase	2	3	2	12	8	26	1	4	58.9275	36.6139	32.4918	7.29411	71.8976	40.1365	127.98	7.08	0.119218	375.341	42.6778	80.0046	-37.3269
L-2-hydroxyglutarate oxidase LhgO				7	11	3	2	3	0	0	0	14.5882	41.9403	55.1876	14.7669	5.31	0.0175066	126.483	0	37.2983	-37.2983
Acetyl-CoA:oxalate CoA-transferase	2	2	4	12	11	27	1	3	58.9275	24.4093	64.9836	7.29411	71.8976	55.1876	132.902	5.31	0.118495	415.602	49.4401	86.6625	-37.2223
Serine protease Do-like HtrB	2	4	5	21	26	9	1	2	58.9275	48.8186	81.2295	7.29411	125.821	130.444	44.3007	3.54	0.138415	496.835	62.9919	100.188	-37.1965
Glc operon transcriptional activator		2	1	13	5	10		2	0	24.4093	16.2459	0	77.8891	25.0853	49.223	3.54	0.0460811	192.853	13.5517	50.7325	-37.1807
Fructose-1-phosphate phosphatase YqaB	5	9	1	18	14	42		2	147.319	109.842	16.2459	0	107.846	70.2388	206.737	3.54	0.272955	658.228	91.1355	128.274	-37.1385
Homoserine O-succinyltransferase	2	1	1	8	30		1		58.9275	12.2046	16.2459	7.29411	47.9317	150.512	0	0	0.236769	293.116	29.126	66.1478	-37.0218
O-GlcNAcase		1		9	2	12		1	0	12.2046	0	0	53.9232	10.0341	59.0676	1.77	0.0416023	135.23	4.06822	41.0083	-36.9401
putative inner membrane transporter YicL			2	14	3	9		1	0	0	32.4918	0	83.8806	15.0512	44.3007	1.77	0.0895839	175.724	10.8306	47.7441	-36.9135
Chromosome-partitioning protein Spo0J	5		14	27	39	26	1	3	147.319	0	227.443	7.29411	161.77	195.665	127.98	5.31	0.311646	867.47	124.92	161.805	-36.8845
Beta-monoglucosyldiacylglycerol synthase		4		10	10	10	1		0	48.8186	0	7.29411	59.9147	50.1706	49.223	0	0.0455604	215.421	16.2729	53.1028	-36.8299
6%2C7-dimethyl-8-ribityllumazine synthase	7	14	14	34	43	60	5	10	206.246	170.865	227.443	36.4705	203.71	215.733	295.338	17.7	0.164921	1355.81	201.518	238.26	-36.7425
Transcriptional regulator KdgR		7	5	23	13	15	1	1	0	85.4325	81.2295	7.29411	137.804	65.2218	73.8345	1.77	0.182723	450.816	55.554	92.2867	-36.7327
4-amino-4-deoxy-L-arabinose-phosphoundecaprenol flippase subunit ArnE		3	3	11	14	12		1	0	36.6139	48.7377	0	65.9061	70.2388	59.0676	1.77	0.0355899	280.564	28.4505	65.0709	-36.6203
putative oxidoreductase EphD		1		2	14	8	3	3	0	12.2046	0	21.8823	11.9829	70.2388	39.3784	5.31	0.0514546	155.687	4.06822	40.5334	-36.4652
Adenosylmethionine-8-amino-7-oxononanoate aminotransferase	3	12	4	21	28	29	1	5	88.3913	146.456	64.9836	7.29411	125.821	140.478	142.747	8.85	0.107956	716.17	99.9435	136.348	-36.4049
ATP-dependent 6-phosphofructokinase 2	1	4	1	4	26	10			29.4638	48.8186	16.2459	0	23.9659	130.444	49.223	0	0.169254	298.161	31.5094	67.8775	-36.368
Aminopeptidase E		5		1	17	16		4	0	61.0232	0	0	5.99147	85.29	78.7568	7.08	0.163409	231.062	20.3411	56.6794	-36.3383
putative glycine dehydrogenase (decarboxylating) subunit 2		1	4	17	4	13		1	0	12.2046	64.9836	0	101.855	20.0682	63.9899	1.77	0.153103	263.101	25.7294	61.971	-36.2416
Ammonium transporter	1	5	5	13	7	34		4	29.4638	61.0232	81.2295	0	77.8891	35.1194	167.358	7.08	0.217415	452.083	57.2388	93.4556	-36.2168
Cinnamate reductase			2	12	3	11		6	0	0	32.4918	0	71.8976	15.0512	54.1453	10.62	0.0721272	173.586	10.8306	47.0314	-36.2008
tRNA pseudouridine synthase C	5	18	4	27	46	30	3	6	147.319	219.684	64.9836	21.8823	161.77	230.785	147.669	10.62	0.261251	994.092	143.995	180.074	-36.0791
Dipeptide and tripeptide permease C		2		8	9	8		1	0	24.4093	0	0	47.9317	45.1535	39.3784	1.77	0.00669185	156.873	8.13643	44.1546	-36.0181
Peptidoglycan-N-acetylmuramic acid deacetylase PdaC	2	3	6	22	20	14		1	58.9275	36.6139	97.4754	0	131.812	100.341	68.9122	1.77	0.114671	494.083	64.3389	100.355	-36.0163
PTS-dependent dihydroxyacetone kinase%2C dihydroxyacetone-binding subunit DhaK	3	7	6	22	12	38	1	12	88.3913	85.4325	97.4754	7.29411	131.812	60.2047	187.047	21.24	0.192695	657.658	90.4331	126.355	-35.9218
Glycine cleavage system H protein	6	12	8	28	42	37	1	8	176.783	146.456	129.967	7.29411	167.761	210.716	182.125	14.16	0.0635743	1021.1	151.069	186.868	-35.7991
Exodeoxyribonuclease	3	7	17	29	47	30	2	5	88.3913	85.4325	276.18	14.5882	173.753	235.802	147.669	8.85	0.314204	1021.82	150.001	185.741	-35.7398
DNA replication protein DnaC		6	6	14	21	18		7	0	73.2279	97.4754	0	83.8806	105.358	88.6014	12.39	0.149956	448.543	56.9011	92.6134	-35.7123
Catabolite control protein A	7	19	18	57	40	60		7	206.246	231.888	292.426	0	341.514	200.682	295.338	12.39	0.252284	1568.09	243.52	279.178	-35.6578
Nudix hydrolase	2	3	2	7	11	28		5	58.9275	36.6139	32.4918	0	41.9403	55.1876	137.824	8.85	0.157865	362.986	42.6778	78.3175	-35.6397
Putative electron transport protein YccM	2	10	13	27	27	41		3	58.9275	122.046	211.197	0	161.77	135.461	201.814	5.31	0.250429	891.215	130.724	166.348	-35.6246
Glucose-6-phosphate isomerase	14	25	23	64	75	89	7	26	412.493	305.116	373.656	51.0587	383.454	376.279	438.085	46.02	0.195503	2340.14	363.755	399.273	-35.5179
3-oxoacyl-[acyl-carrier-protein] synthase 1	3	2	1	11	23	11	2	4	88.3913	24.4093	16.2459	14.5882	65.9061	115.392	54.1453	7.08	0.148049	379.078	43.0155	78.4813	-35.4658
Phosphoribosylformylglycinamidine synthase	8	23	13	33	65	63	8	15	235.71	280.707	211.197	58.3528	197.718	326.109	310.105	26.55	0.238566	1619.9	242.538	277.977	-35.4395
Hydroxyethylthiazole kinase	7	14	4	27	22	56	3	4	206.246	170.865	64.9836	21.8823	161.77	110.375	275.649	7.08	0.307489	1011.77	147.365	182.598	-35.2329
Urease accessory protein UreG	1	4	10	15	5	47		2	29.4638	48.8186	162.459	0	89.872	25.0853	231.348	3.54	0.328951	587.047	80.2471	115.435	-35.1881
N-formyl-4-amino-5-aminomethyl-2-methylpyrimidine deformylase	1	5	1	9	9	23		3	29.4638	61.0232	16.2459	0	53.9232	45.1535	113.213	5.31	0.117309	319.023	35.5776	70.7632	-35.1856
Lipid II flippase FtsW					21		3		0	0	0	21.8823	0	105.358	0	0	0.18695	127.241	0	35.1194	-35.1194
Peptidyl-dipeptidase dcp					21		1		0	0	0	7.29411	0	105.358	0	0	0.18695	112.652	0	35.1194	-35.1194
putative ABC transporter ATP-binding protein YbhF					21		1		0	0	0	7.29411	0	105.358	0	0	0.18695	112.652	0	35.1194	-35.1194
Serine/threonine-protein kinase BtrW	1	1		13	2	12		3	29.4638	12.2046	0	0	77.8891	10.0341	59.0676	5.31	0.0925403	188.659	13.8895	48.9969	-35.1075
Adenosyl-chloride synthase			1	17		4			0	0	16.2459	0	101.855	0	19.6892	0	0.164869	137.79	5.4153	40.5147	-35.0994
Triosephosphate isomerase	10	21	26	53	82	71	4	19	294.638	256.298	422.393	29.1764	317.548	411.399	349.483	33.63	0.286894	2080.93	324.443	359.477	-35.0338
putative sensor-like histidine kinase	2	6	3	27	10	15	1	3	58.9275	73.2279	48.7377	7.29411	161.77	50.1706	73.8345	5.31	0.185253	473.962	60.2977	95.2582	-34.9605
Ribulokinase		1	2	15	6	6			0	12.2046	32.4918	0	89.872	30.1023	29.5338	0	0.0949149	194.205	14.8988	49.8361	-34.9372
Toluene efflux pump periplasmic linker protein TtgA		1		8	1	13		5	0	12.2046	0	0	47.9317	5.01706	63.9899	8.85	0.0627365	129.143	4.06822	38.9796	-34.9114
Sec-independent protein translocase protein TatCy		3		11	10	5		6	0	36.6139	0	0	65.9061	50.1706	24.6115	10.62	0.0564814	177.302	12.2046	46.8961	-34.6914
Putative glycosyltransferase CsbB	1		3	18	6	9		2	29.4638	0	48.7377	0	107.846	30.1023	44.3007	3.54	0.140027	260.451	26.0672	60.7498	-34.6827
Putative serine protease HhoB			1	10	10	2	3	7	0	0	16.2459	21.8823	59.9147	50.1706	9.8446	12.39	0.0503182	158.058	5.4153	39.9766	-34.5613
putative hydrolase YxeP	11	11	7	41	17	70	4	7	324.101	134.251	113.721	29.1764	245.65	85.29	344.561	12.39	0.374954	1276.75	190.691	225.167	-34.4758
Flavin prenyltransferase UbiX	5	5	5	21	14	40	3	8	147.319	61.0232	81.2295	21.8823	125.821	70.2388	196.892	14.16	0.243122	704.406	96.5238	130.984	-34.4601
dITP/XTP pyrophosphatase	14	24	25	68	54	109	5	14	412.493	292.912	406.147	36.4705	407.42	270.921	536.531	24.78	0.354581	2362.89	370.517	404.957	-34.4401
Anaerobic ribonucleoside-triphosphate reductase	9	48	18	54	132	53	4	12	265.174	585.823	292.426	29.1764	323.539	662.252	260.882	21.24	0.420825	2419.27	381.141	415.558	-34.4166
Spore germination protein B1		5	10	18	23	21		3	0	61.0232	162.459	0	107.846	115.392	103.368	5.31	0.254696	550.089	74.4941	108.869	-34.375
putative capsular polysaccharide biosynthesis protein YwqC		4		12	13	3		1	0	48.8186	0	0	71.8976	65.2218	14.7669	1.77	0.115079	200.705	16.2729	50.6288	-34.3559
Cyclomaltodextrinase	4	6		10	28	19	1	4	117.855	73.2279	0	7.29411	59.9147	140.478	93.5237	7.08	0.227848	492.293	63.6943	97.972	-34.2777
Multidrug/solvent efflux pump periplasmic linker protein MepA				4	1	15		1	0	0	0	0	23.9659	5.01706	73.8345	1.77	0.0851284	102.817	0	34.2725	-34.2725
Biotin synthase	4	18	8	27	49	33	3	5	117.855	219.684	129.967	21.8823	161.77	245.836	162.436	8.85	0.233419	1059.43	155.835	190.014	-34.1785
L-fucose isomerase			1	9	9	4		1	0	0	16.2459	0	53.9232	45.1535	19.6892	1.77	0.0211081	135.012	5.4153	39.5886	-34.1733
Pyruvate kinase	10	29	19	34	97	75	2	13	294.638	353.935	308.672	14.5882	203.71	486.655	369.173	23.01	0.352783	2031.37	319.081	353.179	-34.0976
Putative pre-16S rRNA nuclease	12	32	23	61	81	91	3	18	353.565	390.549	373.656	21.8823	365.48	406.382	447.929	31.86	0.131204	2359.44	372.59	406.597	-34.0071
Cobalt transport protein CbiN		1		5	5	12		1	0	12.2046	0	0	29.9573	25.0853	59.0676	1.77	0.0201776	126.315	4.06822	38.0367	-33.9685
2-succinyl-5-enolpyruvyl-6-hydroxy-3-cyclohexene-1-carboxylate synthase	3	5	3	16	22	19	2	2	88.3913	61.0232	48.7377	14.5882	95.8635	110.375	93.5237	3.54	0.0289193	512.503	66.0507	99.9208	-33.8701
Galactokinase	13	22	27	63	74	90	6	20	383.029	268.502	438.639	43.7646	377.462	371.262	443.007	35.4	0.286068	2325.67	363.39	397.244	-33.8539
Transposon Tn10 TetC protein				7	4	8			0	0	0	0	41.9403	20.0682	39.3784	0	0.00403507	101.387	0	33.7956	-33.7956
CRISPR-associated endoribonuclease Cas2	4	8	17	30	49	34		4	117.855	97.6372	276.18	0	179.744	245.836	167.358	7.08	0.306089	1084.61	163.891	197.646	-33.7552
Cobalt-precorrin-5A hydrolase			4	12	7	12		1	0	0	64.9836	0	71.8976	35.1194	59.0676	1.77	0.118036	231.068	21.6612	55.3615	-33.7003
Multidrug resistance protein MdtB	1	7	3	11	19	21		3	29.4638	85.4325	48.7377	0	65.9061	95.3241	103.368	5.31	0.0836736	428.233	54.5447	88.1995	-33.6549
Validoxylamine A glucosyltransferase		3		4	4	19			0	36.6139	0	0	23.9659	20.0682	93.5237	0	0.138831	174.172	12.2046	45.8526	-33.648
Group II intron-encoded protein LtrA	11	11	12	63	28	48	3	15	324.101	134.251	194.951	21.8823	377.462	140.478	236.27	26.55	0.361931	1429.4	217.768	251.404	-33.6358
DEAD-box ATP-dependent RNA helicase RhpA		1	1	5	10	10	1	3	0	12.2046	16.2459	7.29411	29.9573	50.1706	49.223	5.31	0.00741176	165.096	9.48352	43.117	-33.6335
L-arabinose isomerase				11	2	5			0	0	0	0	65.9061	10.0341	24.6115	0	0.0578497	100.552	0	33.5173	-33.5173
Biofilm regulatory protein A		1		13	4	3			0	12.2046	0	0	77.8891	20.0682	14.7669	0	0.0897528	124.929	4.06822	37.5747	-33.5065
Glycine reductase complex component B subunit gamma		1	3	22		6			0	12.2046	48.7377	0	131.812	0	29.5338	0	0.237692	222.288	20.3141	53.782	-33.4679
Imidazole glycerol phosphate synthase subunit HisH 1					20				0	0	0	0	0	100.341	0	0	0.18695	100.341	0	33.4471	-33.4471
Ethanolamine ammonia-lyase heavy chain		1		13	1	6		2	0	12.2046	0	0	77.8891	5.01706	29.5338	3.54	0.099994	124.645	4.06822	37.48	-33.4118
D-glycero-alpha-D-manno-heptose-1%2C7-bisphosphate 7-phosphatase	1	1	1	9	9	12		1	29.4638	12.2046	16.2459	0	53.9232	45.1535	59.0676	1.77	0.00359966	216.059	19.3048	52.7148	-33.41
Inner membrane protein YbhL	1	3	7	16	19	18		1	29.4638	36.6139	113.721	0	95.8635	95.3241	88.6014	1.77	0.142867	459.588	59.933	93.263	-33.33
Tyrosine-protein kinase etk	2	2		9	13	13		6	58.9275	24.4093	0	0	53.9232	65.2218	63.9899	10.62	0.0647632	266.472	27.7789	61.045	-33.266
Proline--tRNA ligase	17	25	28	67	96	97	9	20	500.884	305.116	454.885	65.647	401.428	481.638	477.463	35.4	0.317107	2687.06	420.295	453.51	-33.2146
Dipeptide and tripeptide permease A	2	1	1	13	6	16		1	58.9275	12.2046	16.2459	0	77.8891	30.1023	78.7568	1.77	0.102898	274.126	29.126	62.2494	-33.1234
2-C-methyl-D-erythritol 2%2C4-cyclodiphosphate synthase	14	20	23	61	64	90	6	19	412.493	244.093	373.656	43.7646	365.48	321.092	443.007	33.63	0.311168	2203.58	343.414	376.526	-33.1124
Precorrin-2 dehydrogenase		1	1	8	6	10			0	12.2046	16.2459	0	47.9317	30.1023	49.223	0	0.00692625	155.708	9.48352	42.419	-32.9355
ABC transporter ATP-binding/permease protein		1	2	9	10	8	1		0	12.2046	32.4918	7.29411	53.9232	50.1706	39.3784	0	0.0171477	195.463	14.8988	47.8241	-32.9253
Meso-diaminopimelate D-dehydrogenase		3			24	3		1	0	36.6139	0	0	0	120.409	14.7669	1.77	0.227909	171.79	12.2046	45.0588	-32.8541
Putative aminotransferase/MSMEI_6121	1	4	4	17	19	9		1	29.4638	48.8186	64.9836	0	101.855	95.3241	44.3007	1.77	0.0960844	384.746	47.7553	80.4933	-32.7379
4-hydroxy-2%2C2'-bipyrrole-5-methanol synthase PigH				4	3	12		3	0	0	0	0	23.9659	15.0512	59.0676	5.31	0.0358534	98.0847	0	32.6949	-32.6949
V-type sodium ATPase catalytic subunit A	6	13	5	17	45	38	2	5	176.783	158.66	81.2295	14.5882	101.855	225.768	187.047	8.85	0.262167	945.931	138.891	171.557	-32.6659
putative peptidoglycan D%2CD-transpeptidase PenA	1	2	1	5	2	26		2	29.4638	24.4093	16.2459	0	29.9573	10.0341	127.98	3.54	0.211909	238.09	23.373	55.9904	-32.6174
3%2C6-anhydro-alpha-L-galactonate cycloisomerase		6	10	10	30	25	1	2	0	73.2279	162.459	7.29411	59.9147	150.512	123.058	3.54	0.289616	576.465	78.5623	111.161	-32.599
L-rhamnose isomerase		2	1	9	5	12		4	0	24.4093	16.2459	0	53.9232	25.0853	59.0676	7.08	0.031948	178.731	13.5517	46.0254	-32.4736
Acetoin:2%2C6-dichlorophenolindophenol oxidoreductase subunit alpha			1	14	2	4			0	0	16.2459	0	83.8806	10.0341	19.6892	0	0.122193	129.85	5.4153	37.868	-32.4527
Thymidylate synthase 1	1	2	8	17	22	14		4	29.4638	24.4093	129.967	0	101.855	110.375	68.9122	7.08	0.212942	464.983	61.2801	93.7142	-32.4341
Glucose-6-phosphate 3-dehydrogenase				8		10		1	0	0	0	0	47.9317	0	49.223	1.77	0.0580934	97.1548	0	32.3849	-32.3849
UDP-2-acetamido-3-amino-2%2C3-dideoxy-D-glucuronate N-acetyltransferase				2	12	5			0	0	0	0	11.9829	60.2047	24.6115	0	0.0445587	96.7991	0	32.2664	-32.2664
Putative DNA repair helicase RadD	9	11	14	40	67	30	4	5	265.174	134.251	227.443	29.1764	239.659	336.143	147.669	8.85	0.327696	1379.51	208.956	241.157	-32.201
D-hydantoinase		3	1	9	18	1			0	36.6139	16.2459	0	53.9232	90.307	4.9223	0	0.149438	202.012	17.6199	49.7175	-32.0976
Stage III sporulation protein AE	3	9	3	24	24	16		4	88.3913	109.842	48.7377	0	143.795	120.409	78.7568	7.08	0.143869	589.932	82.3236	114.32	-31.9969
Stage V sporulation protein T	3	10	10	30	36	22	2	4	88.3913	122.046	162.459	14.5882	179.744	180.614	108.291	7.08	0.188415	856.134	124.299	156.216	-31.9173
Autolytic lysozyme	1	2	4	15	17	8		2	29.4638	24.4093	64.9836	0	89.872	85.29	39.3784	3.54	0.0979243	333.397	39.6189	71.5135	-31.8946
Phosphoglycerate kinase	9	22	20	43	79	61	5	18	265.174	268.502	324.918	36.4705	257.633	396.348	300.26	31.86	0.260495	1849.31	286.198	318.08	-31.8824
Stage IV sporulation protein A	3	8	9	24	36	21	1	6	88.3913	97.6372	146.213	7.29411	143.795	180.614	103.368	10.62	0.16411	767.313	110.747	142.593	-31.8454
Secreted effector protein PipB2		2			19	5		1	0	24.4093	0	0	0	95.3241	24.6115	1.77	0.172066	144.345	8.13643	39.9785	-31.8421
Gamma-glutamyl-gamma-aminobutyrate hydrolase PuuD	1	1		3	10	14		3	29.4638	12.2046	0	0	17.9744	50.1706	68.9122	5.31	0.0687201	178.726	13.8895	45.6857	-31.7963
Flagellar biosynthetic protein FliQ					19		3		0	0	0	21.8823	0	95.3241	0	0	0.18695	117.206	0	31.7747	-31.7747
Glycerophosphoryl diester phosphodiesterase					19		3		0	0	0	21.8823	0	95.3241	0	0	0.18695	117.206	0	31.7747	-31.7747
putative diguanylate cyclase AdrA					19		2		0	0	0	14.5882	0	95.3241	0	0	0.18695	109.912	0	31.7747	-31.7747
putative TonB-dependent receptor		6		4	16	13			0	73.2279	0	0	23.9659	80.2729	63.9899	0	0.17242	241.457	24.4093	56.0762	-31.6669
Riboflavin transporter RibU	2	6	11	27	30	19	1	3	58.9275	73.2279	178.705	7.29411	161.77	150.512	93.5237	5.31	0.252555	723.959	103.62	135.268	-31.6483
putative glycine dehydrogenase (decarboxylating) subunit 1		1	4	13	5	14			0	12.2046	64.9836	0	77.8891	25.0853	68.9122	0	0.143846	249.075	25.7294	57.2955	-31.5661
Methylmalonyl-CoA mutase small subunit		1		2	10	9		1	0	12.2046	0	0	11.9829	50.1706	44.3007	1.77	0.0332663	118.659	4.06822	35.4847	-31.4165
Phosphoribosylformylglycinamidine synthase subunit PurQ	1	3	9	18	17	23		7	29.4638	36.6139	146.213	0	107.846	85.29	113.213	12.39	0.23185	518.64	70.7636	102.116	-31.3529
Carbon dioxide-concentrating mechanism protein CcmK			1	11		9		3	0	0	16.2459	0	65.9061	0	44.3007	5.31	0.0974415	126.453	5.4153	36.7356	-31.3203
Glucosaminate ammonia-lyase		2		4	9	10			0	24.4093	0	0	23.9659	45.1535	49.223	0	0.02509	142.752	8.13643	39.4475	-31.311
Protein CbbX		2		9	2	11		2	0	24.4093	0	0	53.9232	10.0341	54.1453	3.54	0.0680395	142.512	8.13643	39.3675	-31.2311
Lipoprotein-releasing system ATP-binding protein LolD	18	27	19	64	77	100	7	22	530.348	329.525	308.672	51.0587	383.454	386.313	492.23	38.94	0.357107	2481.6	389.515	420.666	-31.1508
putative M18 family aminopeptidase 2	1	10	6	18	31	16	2	4	29.4638	122.046	97.4754	14.5882	107.846	155.529	78.7568	7.08	0.216183	605.706	82.9952	114.044	-31.0488
Fructokinase	5	9	8	37	26	26	2	10	147.319	109.842	129.967	14.5882	221.684	130.444	127.98	17.7	0.198309	881.824	129.043	160.036	-30.9933
50S ribosomal protein L13	10	18	17	41	82	46	4	13	294.638	219.684	276.18	29.1764	245.65	411.399	226.426	23.01	0.324013	1703.15	263.501	294.492	-30.9911
putative endopeptidase		4		12	8	6			0	48.8186	0	0	71.8976	40.1365	29.5338	0	0.104431	190.386	16.2729	47.1893	-30.9164
Stage V sporulation protein D	12	26	23	71	79	64	2	10	353.565	317.321	373.656	14.5882	425.394	396.348	315.027	17.7	0.225897	2195.9	348.181	378.923	-30.7425
Putative membrane protein insertion efficiency factor	9	10	16	33	54	55	7	15	265.174	122.046	259.934	51.0587	197.718	270.921	270.727	26.55	0.295912	1437.58	215.718	246.455	-30.7372
Urease subunit beta	1	2	1	9	1	21		1	29.4638	24.4093	16.2459	0	53.9232	5.01706	103.368	1.77	0.171939	232.428	23.373	54.1029	-30.7299
ATP synthase subunit c%2C sodium ion specific	1	11	2	19	24	11	1	3	29.4638	134.251	32.4918	7.29411	113.838	120.409	54.1453	5.31	0.2445	491.893	65.4022	96.1309	-30.7286
GTPase ArgK		4		7	4	16		2	0	48.8186	0	0	41.9403	20.0682	78.7568	3.54	0.132126	189.584	16.2729	46.9218	-30.6489
putative aminopeptidase	2	3	2	16	11	14	2	6	58.9275	36.6139	32.4918	14.5882	95.8635	55.1876	68.9122	10.62	0.0510287	362.585	42.6778	73.3211	-30.6434
Glucose 1-dehydrogenase		2	2	5	7	17	1	4	0	24.4093	32.4918	7.29411	29.9573	35.1194	83.6791	7.08	0.0975746	212.951	18.967	49.5853	-30.6183
D-alanyl-D-alanine carboxypeptidase DacB	10	13	17	59	54	40	4	9	294.638	158.66	276.18	29.1764	353.497	270.921	196.892	15.93	0.324008	1579.96	243.159	273.77	-30.6105
Ribose-5-P isomerase B			2	10	3	10		3	0	0	32.4918	0	59.9147	15.0512	49.223	5.31	0.0762784	156.681	10.8306	41.3963	-30.5657
Serine/threonine-protein kinase D				7	5	5		6	0	0	0	0	41.9403	25.0853	24.6115	10.62	0.00292336	91.6371	0	30.5457	-30.5457
Thiamine pyrophosphokinase	3	8	6	26	29	15	1	3	88.3913	97.6372	97.4754	7.29411	155.778	145.495	73.8345	5.31	0.152306	665.905	94.5013	125.036	-30.5345
Outer membrane protein assembly factor BamB	5	4	2	26	20	13	3	6	147.319	48.8186	32.4918	21.8823	155.778	100.341	63.9899	10.62	0.266313	570.621	76.2097	106.703	-30.4934
Putative serine protease HhoA			1	3	11	7		1	0	0	16.2459	0	17.9744	55.1876	34.4561	1.77	0.0324235	123.864	5.4153	35.8727	-30.4574
GalNAc(5)-diNAcBac-PP-undecaprenol beta-1%2C3-glucosyltransferase		2	3	6	6	20		2	0	24.4093	48.7377	0	35.9488	30.1023	98.446	3.54	0.153322	237.644	24.3823	54.8324	-30.4501
Bifunctional protein Aas	2	3	8	24	8	27		1	58.9275	36.6139	129.967	0	143.795	40.1365	132.902	1.77	0.26034	542.342	75.1695	105.611	-30.4417
Small ribosomal subunit biogenesis GTPase RsgA	15	28	20	74	36	117	5	28	441.956	341.73	324.918	36.4705	443.369	180.614	575.909	49.56	0.407489	2344.97	369.535	399.964	-30.4292
Ferric enterobactin transport ATP-binding protein FepC	2	9	6	19	24	25	1	3	58.9275	109.842	97.4754	7.29411	113.838	120.409	123.058	5.31	0.0615578	630.844	88.7482	119.102	-30.3534
4-hydroxy-4-methyl-2-oxoglutarate aldolase/4-carboxy-4-hydroxy-2-oxoadipate aldolase			1	8	3	9			0	0	16.2459	0	47.9317	15.0512	44.3007	0	0.0304544	123.53	5.4153	35.7612	-30.3459
putative transcriptional regulatory protein YebC			1	2	18	1	2		0	0	16.2459	14.5882	11.9829	90.307	4.9223	0	0.169049	138.046	5.4153	35.7374	-30.3221
Transaldolase	5	3	4	31	15	16	2	5	147.319	36.6139	64.9836	14.5882	185.736	75.2559	78.7568	8.85	0.285645	603.253	82.9721	113.249	-30.2773
HTH-type transcriptional regulator AscG		1		8	8	3			0	12.2046	0	0	47.9317	40.1365	14.7669	0	0.0245191	115.04	4.06822	34.2784	-30.2102
Thioredoxin C-1	1	6	5	11	20	22		2	29.4638	73.2279	81.2295	0	65.9061	100.341	108.291	3.54	0.109034	458.459	61.307	91.5126	-30.2056
Copper-sensing transcriptional repressor CsoR	1	9	4	26	13	15	1	2	29.4638	109.842	64.9836	7.29411	155.778	65.2218	73.8345	3.54	0.230568	506.418	68.0964	98.2781	-30.1818
Alkyl hydroperoxide reductase subunit C					18		3		0	0	0	21.8823	0	90.307	0	0	0.18695	112.189	0	30.1023	-30.1023
Octaprenyl-diphosphate synthase					18		3		0	0	0	21.8823	0	90.307	0	0	0.18695	112.189	0	30.1023	-30.1023
Cyclic di-GMP phosphodiesterase Gmr					18		1		0	0	0	7.29411	0	90.307	0	0	0.18695	97.6011	0	30.1023	-30.1023
Carbon starvation protein A					18				0	0	0	0	0	90.307	0	0	0.18695	90.307	0	30.1023	-30.1023
Peptidase T	19	27	12	67	54	102	3	15	559.811	329.525	194.951	21.8823	401.428	270.921	502.075	26.55	0.411485	2280.59	361.429	391.475	-30.0455
Deoxyguanosinetriphosphate triphosphohydrolase-like protein	3	10	14	35	33	31	1	5	88.3913	122.046	227.443	7.29411	209.701	165.563	152.591	8.85	0.272105	973.03	145.96	175.952	-29.9918
High-affinity branched-chain amino acid transport system permease protein LivH	4	15	26	53	37	63		7	117.855	183.07	422.393	0	317.548	185.631	310.105	12.39	0.391676	1536.6	241.106	271.095	-29.9886
2-oxoisovalerate dehydrogenase subunit beta			2	8	7	8		1	0	0	32.4918	0	47.9317	35.1194	39.3784	1.77	0.0295737	154.921	10.8306	40.8099	-29.9793
HTH-type transcriptional regulator AdhR		2		9	7	5			0	24.4093	0	0	53.9232	35.1194	24.6115	0	0.0327905	138.063	8.13643	37.8847	-29.7483
Teichoic acid translocation permease protein TagG	1	6	5	19	18	14	1	4	29.4638	73.2279	81.2295	7.29411	113.838	90.307	68.9122	7.08	0.11196	464.272	61.307	91.0191	-29.712
Albonoursin synthase	1	12		6	26	20		5	29.4638	146.456	0	0	35.9488	130.444	98.446	8.85	0.301704	440.758	58.6398	88.2794	-29.6396
Glycine/sarcosine N-methyltransferase		3	2	8	19	3		1	0	36.6139	32.4918	0	47.9317	95.3241	14.7669	1.77	0.159664	227.128	23.0352	52.6743	-29.639
Methylated-DNA--protein-cysteine methyltransferase	2	15	10	31	25	37	2	11	58.9275	183.07	162.459	14.5882	185.736	125.426	182.125	19.47	0.264866	912.332	134.819	164.429	-29.6103
Ureidoglycolate lyase				4	7	6	1	2	0	0	0	7.29411	23.9659	35.1194	29.5338	3.54	0.000391875	95.9132	0	29.5397	-29.5397
High-affinity zinc uptake system ATP-binding protein ZnuC	4	14	11	34	30	41		5	117.855	170.865	178.705	0	203.71	150.512	201.814	8.85	0.158573	1023.46	155.808	185.345	-29.537
Phosphoenolpyruvate carboxykinase [GTP]		2	4	8	20	6	3	7	0	24.4093	64.9836	21.8823	47.9317	100.341	29.5338	12.39	0.179343	289.082	29.7976	59.2689	-29.4713
Glutamate decarboxylase beta				3	10	4	1	1	0	0	0	7.29411	17.9744	50.1706	19.6892	1.77	0.024416	95.1283	0	29.2781	-29.2781
L-serine dehydratase%2C beta chain		3	6	18	7	16	1	4	0	36.6139	97.4754	7.29411	107.846	35.1194	78.7568	7.08	0.227955	363.106	44.6964	73.9076	-29.2111
Cell division suppressor protein YneA		1		10	5	3		1	0	12.2046	0	0	59.9147	25.0853	14.7669	1.77	0.0549664	111.972	4.06822	33.2556	-29.1874
Tyrosine recombinase XerH		2		12	6	2		2	0	24.4093	0	0	71.8976	30.1023	9.8446	3.54	0.109382	136.254	8.13643	37.2815	-29.1451
putative glycosyltransferase YkoT		1	2	8	2	15		2	0	12.2046	32.4918	0	47.9317	10.0341	73.8345	3.54	0.117699	176.497	14.8988	43.9335	-29.0346
Extracellular basic protease		2		2	11	9			0	24.4093	0	0	11.9829	55.1876	44.3007	0	0.0654914	135.881	8.13643	37.1571	-29.0207
Lactose phosphotransferase system repressor			1	9	1	9			0	0	16.2459	0	53.9232	5.01706	44.3007	0	0.0712051	119.487	5.4153	34.4137	-28.9984
Heparin lyase I		1		5	3	11			0	12.2046	0	0	29.9573	15.0512	54.1453	0	0.037334	111.358	4.06822	33.0513	-28.9831
NAD-specific glutamate dehydrogenase	4	12	5	19	38	26		2	117.855	146.456	81.2295	0	113.838	190.648	127.98	3.54	0.195992	778.006	115.18	144.155	-28.9752
Phosphate-import ATP-binding protein PhnC		4	1	8	7	14		2	0	48.8186	16.2459	0	47.9317	35.1194	68.9122	3.54	0.0857223	217.028	21.6882	50.6545	-28.9663
Cobalt transport protein CbiM		1	1	6	5	11		1	0	12.2046	16.2459	0	35.9488	25.0853	54.1453	1.77	0.0208806	143.63	9.48352	38.3931	-28.9096
GTPase Obg/CgtA	6	10	5	20	23	47	4	9	176.783	122.046	81.2295	29.1764	119.829	115.392	231.348	15.93	0.286185	875.805	126.686	155.523	-28.8371
tRNA-Pro(cgg)			1	8	6	5	1	8	0	0	16.2459	7.29411	47.9317	30.1023	24.6115	14.16	0.0157946	126.186	5.4153	34.2152	-28.7999
tRNA 5-methylaminomethyl-2-thiouridine biosynthesis bifunctional protein MnmC	7	16	2	28	32	39	3	3	206.246	195.274	32.4918	21.8823	167.761	160.546	191.97	5.31	0.320161	976.172	144.671	173.426	-28.7547
Urease subunit alpha	1	3	18	19	11	56		3	29.4638	36.6139	292.426	0	113.838	55.1876	275.649	5.31	0.402364	803.178	119.501	148.225	-28.7235
Rhamnulose-1-phosphate aldolase		2	1	8	1	15		3	0	24.4093	16.2459	0	47.9317	5.01706	73.8345	5.31	0.124592	167.439	13.5517	42.2611	-28.7094
3-phosphoshikimate 1-carboxyvinyltransferase 1	2	4	1	16	10	13	1	3	58.9275	48.8186	16.2459	7.29411	95.8635	50.1706	63.9899	5.31	0.099747	341.31	41.3307	70.008	-28.6773
tRNA-Ser(cga)	2	1	2	10	18	8	2	5	58.9275	12.2046	32.4918	14.5882	59.9147	90.307	39.3784	8.85	0.113011	307.812	34.5413	63.2	-28.6587
Threonine--tRNA ligase	8	11	8	24	42	47	6	9	235.71	134.251	129.967	43.7646	143.795	210.716	231.348	15.93	0.27311	1129.55	166.643	195.287	-28.6438
Xylitol-binding protein				6	6	4			0	0	0	0	35.9488	30.1023	19.6892	0	0.0019289	85.7404	0	28.5801	-28.5801
Stage V sporulation protein K		1	4	14	2	14		1	0	12.2046	64.9836	0	83.8806	10.0341	68.9122	1.77	0.198275	240.015	25.7294	54.2756	-28.5462
Aquaporin Z 2	1	6	3	3	26	18			29.4638	73.2279	48.7377	0	17.9744	130.444	88.6014	0	0.231426	388.449	50.4764	79.0064	-28.53
Mini-ribonuclease 3	5	11	10	26	49	26		6	147.319	134.251	162.459	0	155.778	245.836	127.98	10.62	0.239061	973.623	148.01	176.531	-28.5217
Dipeptide transport ATP-binding protein DppD		4	3	19	3	11	2	1	0	48.8186	48.7377	14.5882	113.838	15.0512	54.1453	1.77	0.218341	295.179	32.5188	61.0115	-28.4927
Cytochrome c biogenesis protein Ccs1				6	3	7		3	0	0	0	0	35.9488	15.0512	34.4561	5.31	0.00667419	85.4561	0	28.4854	-28.4854
Carnitine operon protein CaiE					17		3		0	0	0	21.8823	0	85.29	0	0	0.18695	107.172	0	28.43	-28.43
Hydrogen peroxide-inducible genes activator	10	12	6	43	19	55	4	11	294.638	146.456	97.4754	29.1764	257.633	95.3241	270.727	19.47	0.373129	1191.43	179.523	207.895	-28.3717
putative sensor histidine kinase TcrY		2		10	3	7			0	24.4093	0	0	59.9147	15.0512	34.4561	0	0.0690951	133.831	8.13643	36.474	-28.3376
N-acetylmuramic acid 6-phosphate phosphatase		4	4	15	5	17		5	0	48.8186	64.9836	0	89.872	25.0853	83.6791	8.85	0.188009	312.439	37.9341	66.2121	-28.2781
NADH-quinone oxidoreductase subunit N		1	5	14	5	14		1	0	12.2046	81.2295	0	83.8806	25.0853	68.9122	1.77	0.206474	271.312	31.1447	59.2927	-28.148
V-type ATP synthase alpha chain	2	5	2	12	24	9	3	2	58.9275	61.0232	32.4918	21.8823	71.8976	120.409	44.3007	3.54	0.15424	410.933	50.8142	78.8692	-28.0551
tRNA(Glu)-specific nuclease WapA		1		1	14	4			0	12.2046	0	0	5.99147	70.2388	19.6892	0	0.117285	108.124	4.06822	31.9732	-27.9049
Putative transposon Tn552 DNA-invertase bin3	2	2	4	18	10	15		3	58.9275	24.4093	64.9836	0	107.846	50.1706	73.8345	5.31	0.127507	380.172	49.4401	77.2838	-27.8437
Transcriptional regulator MtlR	1		5	25	1	8	1	1	29.4638	0	81.2295	7.29411	149.787	5.01706	39.3784	1.77	0.302719	312.17	36.8977	64.7274	-27.8296
Acetyl esterase		1		6	5	7		6	0	12.2046	0	0	35.9488	25.0853	34.4561	10.62	0.00317813	107.695	4.06822	31.8301	-27.7619
Alkyl hydroperoxide reductase subunit F	5	8	1	21	22	22	2	6	147.319	97.6372	16.2459	14.5882	125.821	110.375	108.291	10.62	0.255908	620.277	87.0673	114.829	-27.7616
Ribosome-recycling factor	14	24	22	52	80	88	4	16	412.493	292.912	357.41	29.1764	311.556	401.365	433.163	28.32	0.304878	2238.07	354.271	382.028	-27.7565
L-threonine dehydratase biosynthetic IlvA	4	8	2	19	8	36	4	6	117.855	97.6372	32.4918	29.1764	113.838	40.1365	177.203	10.62	0.294371	608.338	82.6613	110.392	-27.7311
Endo-1%2C4-beta-xylanase Z		1	5	12	12	9		3	0	12.2046	81.2295	0	71.8976	60.2047	44.3007	5.31	0.177976	269.837	31.1447	58.801	-27.6563
HTH-type transcriptional repressor CarH	1	3	3	14	7	16			29.4638	36.6139	48.7377	0	83.8806	35.1194	78.7568	0	0.0841777	312.572	38.2718	65.9189	-27.6471
CTP pyrophosphohydrolase		5	4	14	16	9			0	61.0232	64.9836	0	83.8806	80.2729	44.3007	0	0.162689	334.461	42.0023	69.4847	-27.4825
Light-activated DNA-binding protein EL222		3		5	1	17		4	0	36.6139	0	0	29.9573	5.01706	83.6791	7.08	0.177943	155.267	12.2046	39.5512	-27.3465
Acetophenone carboxylase gamma subunit	1			12	2	6			29.4638	0	0	0	71.8976	10.0341	29.5338	0	0.128911	140.929	9.82125	37.1552	-27.3339
D-lyxose ketol-isomerase		3	2	7	3	19		2	0	36.6139	32.4918	0	41.9403	15.0512	93.5237	3.54	0.17588	219.621	23.0352	50.1717	-27.1365
4-hydroxybenzoate octaprenyltransferase	5	10	3	23	8	45	3	8	147.319	122.046	48.7377	21.8823	137.804	40.1365	221.504	14.16	0.337808	739.429	106.034	133.148	-27.1136
putative HTH-type transcriptional regulator YurK	2	1		18	1	8			58.9275	12.2046	0	0	107.846	5.01706	39.3784	0	0.242379	223.374	23.7107	50.7473	-27.0366
Acryloyl-CoA reductase (NADH)		2		6	6	8		1	0	24.4093	0	0	35.9488	30.1023	39.3784	1.77	0.017267	129.839	8.13643	35.1432	-27.0068
putative zinc-type alcohol dehydrogenase-like protein YjmD	2	3	6	15	20	17		2	58.9275	36.6139	97.4754	0	89.872	100.341	83.6791	3.54	0.108674	466.909	64.3389	91.2974	-26.9585
Gliding motility lipoprotein GldH				1	11	4			0	0	0	0	5.99147	55.1876	19.6892	0	0.0698916	80.8683	0	26.9561	-26.9561
Cobyrinate a%2Cc-diamide synthase	1	1	5	15	7	16		1	29.4638	12.2046	81.2295	0	89.872	35.1194	78.7568	1.77	0.184409	326.646	40.966	67.9161	-26.9501
O-antigen biosynthesis glycosyltransferase WbnH				6	4	5			0	0	0	0	35.9488	20.0682	24.6115	0	0.00235349	80.6285	0	26.8762	-26.8762
2-dehydro-3-deoxygluconokinase	12	30	21	81	68	64	4	15	353.565	366.139	341.164	29.1764	485.309	341.16	315.027	26.55	0.320707	2231.54	353.623	380.499	-26.8759
Endo-1%2C4-beta-xylanase		2		5	12	3		1	0	24.4093	0	0	29.9573	60.2047	14.7669	1.77	0.0806216	129.338	8.13643	34.9763	-26.8399
AI-2 transport protein TqsA	1	4		4	19	8	3		29.4638	48.8186	0	21.8823	23.9659	95.3241	39.3784	0	0.179754	258.833	26.0941	52.8895	-26.7953
L-serine dehydratase TdcG	1	2	1	6	13	10	1	1	29.4638	24.4093	16.2459	7.29411	35.9488	65.2218	49.223	1.77	0.0225516	227.807	23.373	50.1312	-26.7582
Acetylornithine/acetyl-lysine aminotransferase					16				0	0	0	0	0	80.2729	0	0	0.18695	80.2729	0	26.7576	-26.7576
2-hydroxy-6-oxo-6-(2'-aminophenyl)hexa-2%2C4-dienoic acid hydrolase		1	1	9	6	5		3	0	12.2046	16.2459	0	53.9232	30.1023	24.6115	5.31	0.029671	137.088	9.48352	36.2124	-26.7288
Inner membrane ABC transporter permease protein YcjP	2	7	11	40	9	24	1	3	58.9275	85.4325	178.705	7.29411	239.659	45.1535	118.135	5.31	0.3564	733.307	107.688	134.316	-26.6275
Putative mycofactocin biosynthesis glycosyltransferase MftF			1	2	4	13			0	0	16.2459	0	11.9829	20.0682	63.9899	0	0.0967896	112.287	5.4153	32.0137	-26.5984
Protein lysine acetyltransferase Pat		1		7	3	7		1	0	12.2046	0	0	41.9403	15.0512	34.4561	1.77	0.0212058	103.652	4.06822	30.4825	-26.4143
putative glycosyltransferase	6	6	5	27	27	23	2	3	176.783	73.2279	81.2295	14.5882	161.77	135.461	113.213	5.31	0.252578	756.271	110.413	136.814	-26.4011
Major cardiolipin synthase ClsA	3	15	9	23	48	24	2	4	88.3913	183.07	146.213	14.5882	137.804	240.819	118.135	7.08	0.302305	929.02	139.225	165.586	-26.3612
Spore maturation protein A	6	12	12	34	48	31	2	7	176.783	146.456	194.951	14.5882	203.71	240.819	152.591	12.39	0.209453	1129.9	172.73	199.04	-26.3103
Inner membrane protein YhaH				4	6	5			0	0	0	0	23.9659	30.1023	24.6115	0	8.7837e-05	78.6797	0	26.2266	-26.2266
Peptide deformylase	8	16	14	25	66	52	1	11	235.71	195.274	227.443	7.29411	149.787	331.126	255.96	19.47	0.326856	1402.59	219.476	245.624	-26.1484
Putative teichuronic acid biosynthesis glycosyltransferase TuaG		4	5	14	13	12			0	48.8186	81.2295	0	83.8806	65.2218	59.0676	0	0.17612	338.218	43.3494	69.39	-26.0406
Fructose-bisphosphate aldolase	7	23	23	57	66	54	2	11	206.246	280.707	373.656	14.5882	341.514	331.126	265.804	19.47	0.327741	1813.64	286.87	312.815	-25.945
Glutamate dehydrogenase				8	3	3			0	0	0	0	47.9317	15.0512	14.7669	0	0.0390708	77.7498	0	25.9166	-25.9166
Branched-chain-amino-acid aminotransferase	12	23	14	45	55	80	5	11	353.565	280.707	227.443	36.4705	269.616	275.938	393.784	19.47	0.32976	1837.52	287.238	313.113	-25.8746
Glycerol-1-phosphate dehydrogenase [NAD(P)+]				3	6	6		1	0	0	0	0	17.9744	30.1023	29.5338	1.77	0.00140666	77.6106	0	25.8702	-25.8702
Sensor protein kinase WalK	2	5	2	21	9	12		1	58.9275	61.0232	32.4918	0	125.821	45.1535	59.0676	1.77	0.192429	382.485	50.8142	76.6807	-25.8665
Ribose import ATP-binding protein RbsA	7	5	10	44	24	25	4	4	206.246	61.0232	162.459	29.1764	263.625	120.409	123.058	7.08	0.353658	965.996	143.243	169.031	-25.7877
Aspartate--tRNA(Asp) ligase	3	2	2	14	9	19		1	88.3913	24.4093	32.4918	0	83.8806	45.1535	93.5237	1.77	0.180241	367.85	48.4308	74.1859	-25.7551
tRNA-Leu(aag)	2	1		9	10	9	4	5	58.9275	12.2046	0	29.1764	53.9232	50.1706	44.3007	8.85	0.114714	248.703	23.7107	49.4648	-25.7541
Ribosomal protein S12 methylthiotransferase accessory factor YcaO				3	1	11			0	0	0	0	17.9744	5.01706	54.1453	0	0.0775906	77.1368	0	25.7123	-25.7123
Xyloglucanase		1			7	11		1	0	12.2046	0	0	0	35.1194	54.1453	1.77	0.0958749	101.469	4.06822	29.7549	-25.6867
putative peptidase	2	4	2	8	20	14	1	1	58.9275	48.8186	32.4918	7.29411	47.9317	100.341	68.9122	1.77	0.103637	364.717	46.746	72.395	-25.6491
Ornithine aminotransferase				2	9	4		4	0	0	0	0	11.9829	45.1535	19.6892	7.08	0.0314817	76.8257	0	25.6086	-25.6086
Cyclic beta-(1%2C2)-glucan synthase NdvB				7	3	4		1	0	0	0	0	41.9403	15.0512	19.6892	1.77	0.0184656	76.6807	0	25.5602	-25.5602
Sensor histidine kinase GlnK				7	3	4			0	0	0	0	41.9403	15.0512	19.6892	0	0.0184656	76.6807	0	25.5602	-25.5602
Chloramphenicol acetyltransferase	4	2	1	11	20	14	1	2	117.855	24.4093	16.2459	7.29411	65.9061	100.341	68.9122	3.54	0.249474	400.964	52.8367	78.3865	-25.5498
(R)-citramalate synthase	1	2	3	4	27	4		3	29.4638	24.4093	48.7377	0	23.9659	135.461	19.6892	5.31	0.272547	281.726	34.2036	59.7052	-25.5016
Aspartyl/glutamyl-tRNA(Asn/Gln) amidotransferase subunit B	7	6	10	25	46	28	1	6	206.246	73.2279	162.459	7.29411	149.787	230.785	137.824	10.62	0.314633	967.623	147.311	172.799	-25.4875
Cobalt transport protein CbiQ				2	5	8			0	0	0	0	11.9829	25.0853	39.3784	0	0.0161225	76.4466	0	25.4822	-25.4822
Glutamate-pyruvate aminotransferase AlaC		3	1	10	4	10		1	0	36.6139	16.2459	0	59.9147	20.0682	49.223	1.77	0.0927633	182.066	17.6199	43.0686	-25.4487
Pyruvate-flavodoxin oxidoreductase	2		1	7	13	9		1	58.9275	0	16.2459	0	41.9403	65.2218	44.3007	1.77	0.12658	226.636	25.0578	50.4876	-25.4298
Sporulation killing factor maturation protein SkfB		2	4	11	14	6		3	0	24.4093	64.9836	0	65.9061	70.2388	29.5338	5.31	0.164807	255.072	29.7976	55.2263	-25.4286
Penicillinase repressor		6	19	45	15	23			0	73.2279	308.672	0	269.616	75.2559	113.213	0	0.414747	839.985	127.3	152.695	-25.395
Peptide methionine sulfoxide reductase MsrA 1			1	8	2	7		2	0	0	16.2459	0	47.9317	10.0341	34.4561	3.54	0.0543946	108.668	5.4153	30.8073	-25.392
Malonyl CoA-acyl carrier protein transacylase	13	24	28	54	73	105	5	17	383.029	292.912	454.885	36.4705	323.539	366.245	516.842	30.09	0.376647	2373.92	376.942	402.209	-25.2669
Lipoate-protein ligase A			1	7	8	2		3	0	0	16.2459	0	41.9403	40.1365	9.8446	5.31	0.0490161	108.167	5.4153	30.6404	-25.2251
DNA protection during starvation protein 2		3	1	9	8	7	2	2	0	36.6139	16.2459	14.5882	53.9232	40.1365	34.4561	3.54	0.0524139	195.964	17.6199	42.8386	-25.2186
Multidrug resistance protein MexA	2	3		12	9	11	2	2	58.9275	36.6139	0	14.5882	71.8976	45.1535	54.1453	3.54	0.126381	281.326	31.8472	57.0655	-25.2183
Esterase EstB		1		3	10	4		2	0	12.2046	0	0	17.9744	50.1706	19.6892	3.54	0.0439886	100.039	4.06822	29.2781	-25.2098
Serine/threonine-protein kinase PknL			1	7	6	4	1	4	0	0	16.2459	7.29411	41.9403	30.1023	19.6892	7.08	0.0200944	115.272	5.4153	30.5773	-25.162
Vitamin B12-dependent ribonucleotide reductase				6	1	7		3	0	0	0	0	35.9488	5.01706	34.4561	5.31	0.0335143	75.422	0	25.1407	-25.1407
Ammonium transporter NrgA					15				0	0	0	0	0	75.2559	0	0	0.18695	75.2559	0	25.0853	-25.0853
Putative teichuronic acid biosynthesis glycosyltransferase TuaC	2	4	3	17	19	7			58.9275	48.8186	48.7377	0	101.855	95.3241	34.4561	0	0.156556	388.119	52.1613	77.2117	-25.0505
Urease accessory protein UreF	1	3	10	12	4	43		2	29.4638	36.6139	162.459	0	71.8976	20.0682	211.659	3.54	0.372292	532.161	76.1789	101.208	-25.0294
Transcriptional regulator LytR	1		2	7	16	3			29.4638	0	32.4918	0	41.9403	80.2729	14.7669	0	0.15611	198.936	20.6519	45.66	-25.0082
Putative metal chaperone YciC	4		2	12	9	22		1	117.855	0	32.4918	0	71.8976	45.1535	108.291	1.77	0.281174	375.689	50.1156	75.1139	-24.9983
putative cystine transporter YijE		2	1	6	6	10			0	24.4093	16.2459	0	35.9488	30.1023	49.223	0	0.0264238	155.929	13.5517	38.4247	-24.873
Trk system potassium uptake protein TrkG	1	3	1	8	7	15		2	29.4638	36.6139	16.2459	0	47.9317	35.1194	73.8345	3.54	0.0626647	239.209	27.4412	52.2952	-24.854
GTP cyclohydrolase 1 type 2	13	23	11	63	31	78	1	13	383.029	280.707	178.705	7.29411	377.462	155.529	383.94	23.01	0.403828	1766.67	280.814	305.644	-24.8301
Cell surface glycoprotein 2	1		4	15	2	14	1		29.4638	0	64.9836	7.29411	89.872	10.0341	68.9122	0	0.230273	270.56	31.4825	56.2728	-24.7903
Benzylsuccinate synthase activating enzyme		3		11	6	3	1		0	36.6139	0	7.29411	65.9061	30.1023	14.7669	0	0.136371	154.683	12.2046	36.9251	-24.7205
Ribosomal large subunit pseudouridine synthase C	9	15	19	40	58	61	3	15	265.174	183.07	308.672	21.8823	239.659	290.989	300.26	26.55	0.291563	1609.71	252.305	276.969	-24.6643
NADPH dehydrogenase	2	2		13	5	11	1	1	58.9275	24.4093	0	7.29411	77.8891	25.0853	54.1453	1.77	0.171841	247.751	27.7789	52.3732	-24.5943
3-hydroxybutyryl-CoA dehydrogenase	1	3	6	18	15	11		4	29.4638	36.6139	97.4754	0	107.846	75.2559	54.1453	7.08	0.204313	400.801	54.5177	79.0825	-24.5648
Beta-galactosidase bgaB				4	5	5		1	0	0	0	0	23.9659	25.0853	24.6115	1.77	9.13091e-08	73.6627	0	24.5542	-24.5542
Rhomboid protease AarA		10	1	8	16	17		2	0	122.046	16.2459	0	47.9317	80.2729	83.6791	3.54	0.286073	350.176	46.0975	70.6279	-24.5305
sn-glycerol-3-phosphate transport system permease protein UgpA	4	8	4	35	17	12		4	117.855	97.6372	64.9836	0	209.701	85.29	59.0676	7.08	0.321312	634.535	93.4919	118.02	-24.5277
Tyrosine phenol-lyase				4	3	7			0	0	0	0	23.9659	15.0512	34.4561	0	0.00599687	73.4732	0	24.4911	-24.4911
Methylmalonyl-CoA mutase		6		7	13	8		4	0	73.2279	0	0	41.9403	65.2218	39.3784	7.08	0.198226	219.768	24.4093	48.8468	-24.4375
putative peptidyl-prolyl cis-trans isomerase	5	12	2	22	20	34	1	7	147.319	146.456	32.4918	7.29411	131.812	100.341	167.358	12.39	0.299301	733.072	108.755	133.171	-24.4151
2-epi-5-epi-valiolone 7-phosphate 2-epimerase		1	1	7	5	7		2	0	12.2046	16.2459	0	41.9403	25.0853	34.4561	3.54	0.0121397	129.932	9.48352	33.8272	-24.3437
RNA polymerase sigma-28 factor	2	12	7	23	34	17		3	58.9275	146.456	113.721	0	137.804	170.58	83.6791	5.31	0.268031	711.167	106.368	130.688	-24.3194
Polysialic acid O-acetyltransferase		4	1	4	5	18		1	0	48.8186	16.2459	0	23.9659	25.0853	88.6014	1.77	0.200176	202.717	21.6882	45.8842	-24.196
Stage III sporulation protein AH		1	1	1	15	4		2	0	12.2046	16.2459	0	5.99147	75.2559	19.6892	3.54	0.16428	129.387	9.48352	33.6455	-24.162
L-lactate dehydrogenase	3	2	2	18	17	5	5	6	88.3913	24.4093	32.4918	36.4705	107.846	85.29	24.6115	10.62	0.246039	399.511	48.4308	72.5826	-24.1519
Putative HMP/thiamine import ATP-binding protein YkoD	4	9	7	31	17	29		5	117.855	109.842	113.721	0	185.736	85.29	142.747	8.85	0.227536	755.19	113.806	137.924	-24.118
Peroxide operon regulator		2	7	11	18	11		1	0	24.4093	113.721	0	65.9061	90.307	54.1453	1.77	0.271023	348.489	46.0435	70.1195	-24.076
D-alanyl-D-alanine carboxypeptidase DacF	1	16	19	37	51	26	1	3	29.4638	195.274	308.672	7.29411	221.684	255.87	127.98	5.31	0.400898	1146.24	177.803	201.845	-24.0413
Thymidine kinase	6	21	12	32	66	36	3	7	176.783	256.298	194.951	21.8823	191.727	331.126	177.203	12.39	0.341553	1349.97	209.344	233.352	-24.0082
D-galactose-binding periplasmic protein	3	5	9	25	13	31	1	4	88.3913	61.0232	146.213	7.29411	149.787	65.2218	152.591	7.08	0.281588	670.522	98.5425	122.533	-23.9907
Putative peptidyl-prolyl cis-trans isomerase	2	4	5	12	21	17		1	58.9275	48.8186	81.2295	0	71.8976	105.358	83.6791	1.77	0.0774328	449.911	62.9919	86.9783	-23.9865
Multiple sugar-binding protein	1	15	5	32	18	17	1	2	29.4638	183.07	81.2295	7.29411	191.727	90.307	83.6791	3.54	0.347979	666.77	97.921	121.904	-23.9834
Acetoin:2%2C6-dichlorophenolindophenol oxidoreductase subunit beta				7	5	1			0	0	0	0	41.9403	25.0853	4.9223	0	0.0442478	71.9479	0	23.9826	-23.9826
scyllo-inositol 2-dehydrogenase (NAD(+))	1		2	9	12	4		2	29.4638	0	32.4918	0	53.9232	60.2047	19.6892	3.54	0.107878	195.773	20.6519	44.6057	-23.9539
RNA-binding protein		1	4	9	15	4	1		0	12.2046	64.9836	7.29411	53.9232	75.2559	19.6892	0	0.202426	233.351	25.7294	49.6228	-23.8934
Membrane lipoprotein TpN32		1	2	7	6	9		4	0	12.2046	32.4918	0	41.9403	30.1023	44.3007	7.08	0.0420854	161.04	14.8988	38.7811	-23.8823
tRNA nuclease WapA		1	4	4	19	6			0	12.2046	64.9836	0	23.9659	95.3241	29.5338	0	0.237883	226.012	25.7294	49.6079	-23.8785
Methenyltetrahydrofolate cyclohydrolase		2	4	7	10	14	1	2	0	24.4093	64.9836	7.29411	41.9403	50.1706	68.9122	3.54	0.155081	257.71	29.7976	53.6744	-23.8767
SkfA peptide export ATP-binding protein SkfE		2	2	9	8	7			0	24.4093	32.4918	0	53.9232	40.1365	34.4561	0	0.0516217	185.417	18.967	42.8386	-23.8716
Toxin-antitoxin biofilm protein TabA	4	7	7	25	26	22	1	1	117.855	85.4325	113.721	7.29411	149.787	130.444	108.291	1.77	0.102157	712.824	105.67	129.507	-23.8373
Hypoxanthine-guanine phosphoribosyltransferase	5	12	7	26	34	31		7	147.319	146.456	113.721	0	155.778	170.58	152.591	12.39	0.0632278	886.445	135.832	159.65	-23.8179
HTH-type transcriptional regulator SinR			2	9	8	2			0	0	32.4918	0	53.9232	40.1365	9.8446	0	0.11627	136.396	10.8306	34.6348	-23.8042
Aldo-keto reductase IolS	5	5	6	30	6	34		4	147.319	61.0232	97.4754	0	179.744	30.1023	167.358	7.08	0.341332	683.022	101.939	125.735	-23.7957
GTP cyclohydrolase FolE2		2	3	10	8	9	1	4	0	24.4093	48.7377	7.29411	59.9147	40.1365	44.3007	7.08	0.0979235	224.793	24.3823	48.1173	-23.735
Autoinducer 2 import system permease protein LsrC			1	8	1	7			0	0	16.2459	0	47.9317	5.01706	34.4561	0	0.0801469	103.651	5.4153	29.135	-23.7197
Multidrug resistance protein MdtA	19	25	30	87	66	116	12	18	559.811	305.116	487.377	87.5293	521.258	331.126	570.987	31.86	0.416497	2863.2	450.768	474.457	-23.6887
Bifunctional protein PyrR		6	3	3	26	9		3	0	73.2279	48.7377	0	17.9744	130.444	44.3007	5.31	0.294503	314.684	40.6552	64.2395	-23.5843
putative hemoglobin and hemoglobin-haptoglobin-binding protein 3				6	3	4			0	0	0	0	35.9488	15.0512	19.6892	0	0.0102467	70.6892	0	23.5631	-23.5631
Tyrosine recombinase XerS		5	1	8	15	5		2	0	61.0232	16.2459	0	47.9317	75.2559	24.6115	3.54	0.185857	225.068	25.7564	49.2664	-23.51
Nif-specific regulatory protein	1		1	2	9	12			29.4638	0	16.2459	0	11.9829	45.1535	59.0676	0	0.112129	161.914	15.2366	38.7347	-23.4981
Putative glycoside/cation symporter YagG		11	2	18	14	12		9	0	134.251	32.4918	0	107.846	70.2388	59.0676	15.93	0.307284	403.896	55.581	79.051	-23.47
Inositol 2-dehydrogenase/D-chiro-inositol 3-dehydrogenase				6		7			0	0	0	0	35.9488	0	34.4561	0	0.0581476	70.4049	0	23.4683	-23.4683
Nitrogen assimilation regulatory protein					14		2		0	0	0	14.5882	0	70.2388	0	0	0.18695	84.827	0	23.4129	-23.4129
Phosphoenolpyruvate carboxykinase [ATP]					14		2		0	0	0	14.5882	0	70.2388	0	0	0.18695	84.827	0	23.4129	-23.4129
Phosphoribosyl 1%2C2-cyclic phosphodiesterase					14		1		0	0	0	7.29411	0	70.2388	0	0	0.18695	77.5329	0	23.4129	-23.4129
Type IIS restriction enzyme Eco57I	1	1	1	3	19	3		4	29.4638	12.2046	16.2459	0	17.9744	95.3241	14.7669	7.08	0.216438	185.98	19.3048	42.6885	-23.3837
UDP-N-acetylglucosamine 1-carboxyvinyltransferase 2	4	7	10	32	31	18	2	1	117.855	85.4325	162.459	14.5882	191.727	155.529	88.6014	1.77	0.283775	816.192	121.916	145.286	-23.3702
Bifunctional xylanase/deacetylase		2	1	6	10	5		2	0	24.4093	16.2459	0	35.9488	50.1706	24.6115	3.54	0.0429903	151.386	13.5517	36.9103	-23.3586
Urease accessory protein UreE	1	4	10	14	5	41		2	29.4638	48.8186	162.459	0	83.8806	25.0853	201.814	3.54	0.371603	551.522	80.2471	103.593	-23.3463
Acetyl-coenzyme A synthetase	7	18	9	30	49	44	8	24	206.246	219.684	146.213	58.3528	179.744	245.836	216.581	42.48	0.237207	1272.66	190.714	214.054	-23.3394
Neopullulanase 2		3	1	4	4	16	1	1	0	36.6139	16.2459	7.29411	23.9659	20.0682	78.7568	1.77	0.171667	182.945	17.6199	40.9303	-23.3104
dTDP-glucose 4%2C6-dehydratase 2	1	6	13	21	20	32	2	3	29.4638	73.2279	211.197	14.5882	125.821	100.341	157.514	5.31	0.352537	712.152	104.629	127.892	-23.2624
Putative dipeptidase	4	6	4	17	24	21		5	117.855	73.2279	64.9836	0	101.855	120.409	103.368	8.85	0.127511	581.699	85.3555	108.544	-23.1887
Fatty acyl-CoA reductase	2	4	1	9	19	9		2	58.9275	48.8186	16.2459	0	53.9232	95.3241	44.3007	3.54	0.158237	317.54	41.3307	64.516	-23.1853
23S rRNA (uracil(1939)-C(5))-methyltransferase RlmD	4	4	4	18	14	25	3	11	117.855	48.8186	64.9836	21.8823	107.846	70.2388	123.058	19.47	0.212463	554.682	77.2191	100.381	-23.1619
putative metallophosphoesterase YhaO		2	11	24	8	18		2	0	24.4093	178.705	0	143.795	40.1365	88.6014	3.54	0.366913	475.647	67.7047	90.8444	-23.1397
DNA-3-methyladenine glycosylase		2	1	5	14	2		1	0	24.4093	16.2459	0	29.9573	70.2388	9.8446	1.77	0.146832	150.696	13.5517	36.6803	-23.1285
Carboxylesterase NlhH	4	4		12	17	16		1	117.855	48.8186	0	0	71.8976	85.29	78.7568	1.77	0.269457	402.618	55.5579	78.6481	-23.0903
50S ribosomal protein L9	12	22	22	57	85	57	6	21	353.565	268.502	357.41	43.7646	341.514	426.45	280.571	37.17	0.338425	2071.78	326.492	349.512	-23.0192
Outer membrane protein B				4	7	2		4	0	0	0	0	23.9659	35.1194	9.8446	7.08	0.0173919	68.9299	0	22.9766	-22.9766
Recombination protein RecR	17	27	33	67	107	101	3	18	500.884	329.525	536.115	21.8823	401.428	536.825	497.152	31.86	0.38797	2823.81	455.508	478.469	-22.9607
Sodium/proline symporter		1	2	9	6	6	1	2	0	12.2046	32.4918	7.29411	53.9232	30.1023	29.5338	3.54	0.0692003	165.55	14.8988	37.8531	-22.9543
Ribonucleotide monophosphatase NagD				4	6	3		1	0	0	0	0	23.9659	30.1023	14.7669	1.77	0.00337476	68.8351	0	22.945	-22.945
3-beta-hydroxycholanate 3-dehydrogenase (NADP(+))		1	1	8	1	9			0	12.2046	16.2459	0	47.9317	5.01706	44.3007	0	0.0954442	125.7	9.48352	32.4165	-22.933
N-acetylneuraminate lyase	4	5	3	28	7	19		6	117.855	61.0232	48.7377	0	167.761	35.1194	93.5237	10.62	0.314485	524.02	75.872	98.8014	-22.9294
Dipeptidase				4	5	4			0	0	0	0	23.9659	25.0853	19.6892	0	7.6879e-05	68.7404	0	22.9135	-22.9135
putative cadmium-transporting ATPase				9		3		1	0	0	0	0	53.9232	0	14.7669	1.77	0.113885	68.6901	0	22.8967	-22.8967
Carbon dioxide concentrating mechanism protein CcmL	1		1	10	3	8			29.4638	0	16.2459	0	59.9147	15.0512	39.3784	0	0.107174	160.054	15.2366	38.1148	-22.8782
Peptidyl-tRNA hydrolase	14	24	30	68	77	95	6	20	412.493	292.912	487.377	43.7646	407.42	386.313	467.619	35.4	0.364802	2497.9	397.594	420.451	-22.8569
Endo-polygalacturonase				4	2	7		4	0	0	0	0	23.9659	10.0341	34.4561	7.08	0.0160482	68.4561	0	22.8187	-22.8187
Anaerobic glycerol-3-phosphate dehydrogenase subunit B		3	4	5	23	5			0	36.6139	64.9836	0	29.9573	115.392	24.6115	0	0.274765	271.559	33.8658	56.6537	-22.7879
2%2C3-bisphosphoglycerate-dependent phosphoglycerate mutase			2	6	9	4	2	4	0	0	32.4918	14.5882	35.9488	45.1535	19.6892	7.08	0.0791271	147.872	10.8306	33.5972	-22.7666
Alpha-hemolysin translocation ATP-binding protein HlyB		1	1	7	5	6		3	0	12.2046	16.2459	0	41.9403	25.0853	29.5338	5.31	0.0159258	125.01	9.48352	32.1865	-22.7029
Heptaprenyl diphosphate synthase component 2		8	3	11	9	21	1	2	0	97.6372	48.7377	7.29411	65.9061	45.1535	103.368	3.54	0.264409	368.097	48.7916	71.476	-22.6844
Peptidoglycan D%2CD-transpeptidase MrdA	13	30	23	75	33	117	3	18	383.029	366.139	373.656	21.8823	449.36	165.563	575.909	31.86	0.43049	2335.54	374.275	396.944	-22.6694
Foldase protein PrsA 1	1	7		3	26	7			29.4638	85.4325	0	0	17.9744	130.444	34.4561	0	0.313427	297.77	38.2988	60.958	-22.6592
Streptopain		1			15	1			0	12.2046	0	0	0	75.2559	4.9223	0	0.20496	92.3828	4.06822	26.7261	-22.6578
MreB-like protein	4	10	6	33	9	33	1	8	117.855	122.046	97.4754	7.29411	197.718	45.1535	162.436	14.16	0.326674	749.979	112.459	135.103	-22.6437
Spermidine-binding periplasmic protein SpuE	1	1		5	7	9		2	29.4638	12.2046	0	0	29.9573	35.1194	44.3007	3.54	0.0383867	151.046	13.8895	36.4592	-22.5697
HTH-type transcriptional regulator AcrR		1	1	6	10	2			0	12.2046	16.2459	0	35.9488	50.1706	9.8446	0	0.0765047	124.415	9.48352	31.988	-22.5045
Ethanolamine ammonia-lyase light chain		1		10	1	3		2	0	12.2046	0	0	59.9147	5.01706	14.7669	3.54	0.132733	91.9033	4.06822	26.5662	-22.498
Myo-inositol 2-dehydrogenase	4	5	9	35	8	29	1	4	117.855	61.0232	146.213	7.29411	209.701	40.1365	142.747	7.08	0.352492	724.97	108.364	130.862	-22.4977
Putative type II secretion system protein F		2	2	10	5	8	1	1	0	24.4093	32.4918	7.29411	59.9147	25.0853	39.3784	1.77	0.0923952	188.574	18.967	41.4595	-22.4924
Anthranilate phosphoribosyltransferase 2				3	1	9		2	0	0	0	0	17.9744	5.01706	44.3007	3.54	0.0621265	67.2922	0	22.4307	-22.4307
Polygalacturonase				3	1	9			0	0	0	0	17.9744	5.01706	44.3007	0	0.0621265	67.2922	0	22.4307	-22.4307
Ornithine carbamoyltransferase%2C catabolic		2		7	5	5			0	24.4093	0	0	41.9403	25.0853	24.6115	0	0.0435387	116.046	8.13643	30.5457	-22.4093
2-succinylbenzoate--CoA ligase	3	3	4	23	13	11	3	4	88.3913	36.6139	64.9836	21.8823	137.804	65.2218	54.1453	7.08	0.249815	469.042	63.3296	85.7236	-22.394
putative transcriptional regulatory protein pdtaR	3	7	3	20	24	10	1	6	88.3913	85.4325	48.7377	7.29411	119.829	120.409	49.223	10.62	0.226498	519.317	74.1872	96.4873	-22.3001
Outer membrane lipoprotein BfpB				2	8	3		2	0	0	0	0	11.9829	40.1365	14.7669	3.54	0.0337689	66.8863	0	22.2954	-22.2954
Collagen adhesin		3	2	11	11	3			0	36.6139	32.4918	0	65.9061	55.1876	14.7669	0	0.157707	204.966	23.0352	45.2869	-22.2517
Cell division protein SepF	3	7	10	24	34	18	1	7	88.3913	85.4325	162.459	7.29411	143.795	170.58	88.6014	12.39	0.279327	746.554	112.094	134.326	-22.2313
Protein MreBH				7	1	4			0	0	0	0	41.9403	5.01706	19.6892	0	0.0536299	66.6465	0	22.2155	-22.2155
Acetolactate synthase isozyme 2 large subunit	2	6	7	19	18	22	3	6	58.9275	73.2279	113.721	21.8823	113.838	90.307	108.291	10.62	0.141232	580.195	81.9589	104.145	-22.1863
2%2C3-dimethylmalate dehydratase small subunit	1	7	10	20	27	18		3	29.4638	85.4325	162.459	0	119.829	135.461	88.6014	5.31	0.30838	621.247	92.4518	114.63	-22.1787
NADH-quinone oxidoreductase subunit L			6	15	3	12	1	3	0	0	97.4754	7.29411	89.872	15.0512	59.0676	5.31	0.300393	268.76	32.4918	54.6636	-22.1718
Penicillin-binding protein PbpB		3		4	3	13		2	0	36.6139	0	0	23.9659	15.0512	63.9899	3.54	0.158549	139.621	12.2046	34.3357	-22.131
Alkaline shock protein 23		4		5	15	2		1	0	48.8186	0	0	29.9573	75.2559	9.8446	1.77	0.215854	163.876	16.2729	38.3526	-22.0797
Aminodeoxyfutalosine deaminase	4	3	3	16	13	22		5	117.855	36.6139	48.7377	0	95.8635	65.2218	108.291	8.85	0.240049	472.583	67.7356	89.792	-22.0564
Foldase protein PrsA 3	1	8	1	10	20	10			29.4638	97.6372	16.2459	0	59.9147	100.341	49.223	0	0.249146	352.826	47.7823	69.8263	-22.044
Chloride/fluoride channel protein				1	9	3		1	0	0	0	0	5.99147	45.1535	14.7669	1.77	0.0688579	65.9119	0	21.9706	-21.9706
Rhamnulokinase			3	10	5	6		2	0	0	48.7377	0	59.9147	25.0853	29.5338	3.54	0.162775	163.271	16.2459	38.1779	-21.932
Diadenylate cyclase		2	5	7	15	11		1	0	24.4093	81.2295	0	41.9403	75.2559	54.1453	1.77	0.223154	276.98	35.2129	57.1138	-21.9009
Bifunctional enzyme IspD/IspF		1	3	2	14	9		4	0	12.2046	48.7377	0	11.9829	70.2388	44.3007	7.08	0.191452	187.465	20.3141	42.1742	-21.86
D-glycerate 2-kinase				6	1	5		1	0	0	0	0	35.9488	5.01706	24.6115	1.77	0.0364022	65.5774	0	21.8591	-21.8591
8-methylmenaquinol:fumarate reductase membrane anchor subunit	1	5	3	16	5	17		6	29.4638	61.0232	48.7377	0	95.8635	25.0853	83.6791	10.62	0.204838	343.853	46.4082	68.2093	-21.8011
Bifunctional protein FolC					13		2		0	0	0	14.5882	0	65.2218	0	0	0.18695	79.81	0	21.7406	-21.7406
Fumarylpyruvate hydrolase					13				0	0	0	0	0	65.2218	0	0	0.18695	65.2218	0	21.7406	-21.7406
RNA polymerase sigma factor YlaC		4	2	12	8	7		3	0	48.8186	32.4918	0	71.8976	40.1365	34.4561	5.31	0.152482	227.801	27.1035	48.8301	-21.7266
Geranylgeranylglyceryl phosphate synthase					11	2			0	0	0	0	0	55.1876	9.8446	0	0.135577	65.0322	0	21.6774	-21.6774
putative oxidoreductase YdhV		2	2	12	8	2		1	0	24.4093	32.4918	0	71.8976	40.1365	9.8446	1.77	0.174147	178.78	18.967	40.6262	-21.6592
ATP-dependent zinc metalloprotease FtsH 2				5	4	3			0	0	0	0	29.9573	20.0682	14.7669	0	0.00416371	64.7925	0	21.5975	-21.5975
Cyclomaltodextrin glucanotransferase		1		2	8	5	1	1	0	12.2046	0	7.29411	11.9829	40.1365	24.6115	1.77	0.0386945	96.2297	4.06822	25.577	-21.5088
Putative 4%2C5-dihydroxyphthalate dehydrogenase		2		4	10	3			0	24.4093	0	0	23.9659	50.1706	14.7669	0	0.0915312	113.313	8.13643	29.6345	-21.498
putative oxidoreductase YdgJ		1		7	3	4			0	12.2046	0	0	41.9403	15.0512	19.6892	0	0.0403287	88.8853	4.06822	25.5602	-21.492
Regulatory protein MgsR	2	14	10	29	25	32	1	2	58.9275	170.865	162.459	7.29411	173.753	125.426	157.514	3.54	0.304185	856.238	130.751	152.231	-21.4804
putative RNA polymerase sigma factor FecI		2		4	9	4		1	0	24.4093	0	0	23.9659	45.1535	19.6892	1.77	0.0654176	113.218	8.13643	29.6029	-21.4664
Glutathione transport system permease protein GsiD	3	7	9	31	18	22	1	2	88.3913	85.4325	146.213	7.29411	185.736	90.307	108.291	3.54	0.288448	711.664	106.679	128.111	-21.4321
N-acetyl-lysine deacetylase		2		4	7	6		3	0	24.4093	0	0	23.9659	35.1194	29.5338	5.31	0.0353749	113.028	8.13643	29.5397	-21.4033
Translation initiation factor IF-3	14	20	16	39	91	59	2	15	412.493	244.093	259.934	14.5882	233.667	456.552	290.416	26.55	0.407737	1911.74	305.507	326.878	-21.3718
putative butyrate kinase 2				4	2	6		1	0	0	0	0	23.9659	10.0341	29.5338	1.77	0.0108672	63.5338	0	21.1779	-21.1779
Glucose-1-phosphate thymidylyltransferase	3	2	5	14	14	21	1	1	88.3913	24.4093	81.2295	7.29411	83.8806	70.2388	103.368	1.77	0.199303	458.812	64.6767	85.8292	-21.1525
MIO-dependent tyrosine 2%2C3-aminomutase				4	1	7			0	0	0	0	23.9659	5.01706	34.4561	0	0.035043	63.439	0	21.1463	-21.1463
Phospholipase YtpA		1		1	7	7			0	12.2046	0	0	5.99147	35.1194	34.4561	0	0.0563896	87.7716	4.06822	25.189	-21.1208
Proline-responsive transcriptional activator PutR		3		10	6	2			0	36.6139	0	0	59.9147	30.1023	9.8446	0	0.164515	136.476	12.2046	33.2872	-21.0826
DNA protection during starvation protein	1	6		6	21	5			29.4638	73.2279	0	0	35.9488	105.358	24.6115	0	0.278939	268.61	34.2305	55.3062	-21.0756
Ferredoxin-dependent glutamate synthase 2		2		8	3	5		2	0	24.4093	0	0	47.9317	15.0512	24.6115	3.54	0.0864259	112.004	8.13643	29.1981	-21.0617
D-galactarolactone cycloisomerase	1	8	7	25	17	14	1	1	29.4638	97.6372	113.721	7.29411	149.787	85.29	68.9122	1.77	0.293649	552.105	80.2741	101.33	-21.0556
Cobalt-precorrin-6A reductase			2	6	5	7			0	0	32.4918	0	35.9488	25.0853	34.4561	0	0.0690027	127.982	10.8306	31.8301	-20.9995
Beta-1%2C4-mannooligosaccharide phosphorylase	1		1	4	11	6			29.4638	0	16.2459	0	23.9659	55.1876	29.5338	0	0.08879	154.397	15.2366	36.2291	-20.9926
Electron transport complex subunit RnfB	2		2	10	9	10		3	58.9275	0	32.4918	0	59.9147	45.1535	49.223	5.31	0.149793	245.711	30.4731	51.4304	-20.9573
NADPH-dependent oxidoreductase				3	5	4		2	0	0	0	0	17.9744	25.0853	19.6892	3.54	0.000308358	62.7489	0	20.9163	-20.9163
10 kDa chaperonin 3				3	5	4			0	0	0	0	17.9744	25.0853	19.6892	0	0.000308358	62.7489	0	20.9163	-20.9163
Dipeptide-binding protein DppE	1	4	2	14	9	9	2	1	29.4638	48.8186	32.4918	14.5882	83.8806	45.1535	44.3007	1.77	0.110189	298.697	36.9247	57.7783	-20.8535
Formate hydrogenlyase subunit 5				3	2	7		1	0	0	0	0	17.9744	10.0341	34.4561	1.77	0.0221705	62.4646	0	20.8215	-20.8215
Transmembrane protein EpsG		2		7	5	4			0	24.4093	0	0	41.9403	25.0853	19.6892	0	0.0600642	111.124	8.13643	28.9049	-20.7685
Ferric enterobactin receptor		2		2	8	7			0	24.4093	0	0	11.9829	40.1365	34.4561	0	0.0774363	110.985	8.13643	28.8585	-20.7221
Thiamine transporter ThiT	1	8	11	24	28	17		5	29.4638	97.6372	178.705	0	143.795	140.478	83.6791	8.85	0.342145	673.758	101.935	122.651	-20.7154
Linear gramicidin synthase subunit D		2		7	2	7		4	0	24.4093	0	0	41.9403	10.0341	34.4561	7.08	0.088225	110.84	8.13643	28.8102	-20.6737
1-phosphatidylinositol phosphodiesterase				2	8	2		1	0	0	0	0	11.9829	40.1365	9.8446	1.77	0.0508906	61.964	0	20.6547	-20.6547
Voltage-gated potassium channel Kch				2	8	2			0	0	0	0	11.9829	40.1365	9.8446	0	0.0508906	61.964	0	20.6547	-20.6547
Cellodextrinase		1		4	7	3			0	12.2046	0	0	23.9659	35.1194	14.7669	0	0.0226764	86.0568	4.06822	24.6174	-20.5492
Sensor protein SrrB		1	5	11	6	12		1	0	12.2046	81.2295	0	65.9061	30.1023	59.0676	1.77	0.248737	248.51	31.1447	51.692	-20.5473
putative membrane protein		1		4	5	5	1	2	0	12.2046	0	7.29411	23.9659	25.0853	24.6115	3.54	0.00369349	93.1614	4.06822	24.5542	-20.486
Putative cysteine protease YraA	1	1	4	3	26	4	2		29.4638	12.2046	64.9836	14.5882	17.9744	130.444	19.6892	0	0.319077	289.347	35.5507	56.0357	-20.485
Autoinducer 2 import system permease protein LsrD			1	8	2	4			0	0	16.2459	0	47.9317	10.0341	19.6892	0	0.0897061	93.901	5.4153	25.885	-20.4697
N-carbamoyl-D-amino acid hydrolase		2	2	9	4	9	1	1	0	24.4093	32.4918	7.29411	53.9232	20.0682	44.3007	1.77	0.109211	182.487	18.967	39.4307	-20.4637
Lysozyme M1		2	3	10	8	7			0	24.4093	48.7377	0	59.9147	40.1365	34.4561	0	0.13572	207.654	24.3823	44.8358	-20.4534
N-acetylmuramoyl-L-alanine amidase LytC	4	15	6	26	39	22	1	1	117.855	183.07	97.4754	7.29411	155.778	195.665	108.291	1.77	0.30078	865.428	132.8	153.245	-20.4446
2-methylcitrate synthase 1				6	5				0	0	0	0	35.9488	25.0853	0	0	0.0642813	61.0341	0	20.3447	-20.3447
HTH-type transcriptional regulator HmrR				6	5				0	0	0	0	35.9488	25.0853	0	0	0.0642813	61.0341	0	20.3447	-20.3447
5-keto-L-gluconate epimerase			2	9	1	7			0	0	32.4918	0	53.9232	5.01706	34.4561	0	0.159703	125.888	10.8306	31.1321	-20.3015
putative phospholipid ABC transporter-binding protein MlaD	4	7	6	24	12	32	5	4	117.855	85.4325	97.4754	36.4705	143.795	60.2047	157.514	7.08	0.279715	698.747	100.254	120.505	-20.2502
Putative fimbrium anchoring subunit Fim4B		4		1	2	19			0	48.8186	0	0	5.99147	10.0341	93.5237	0	0.285495	158.368	16.2729	36.5164	-20.2436
Endo-1%2C3-1%2C4-beta-glycanase ExsH				1	6	5		1	0	0	0	0	5.99147	30.1023	24.6115	1.77	0.0250775	60.7053	0	20.2351	-20.2351
Nitronate monooxygenase	5	17	18	38	29	68		12	147.319	207.479	292.426	0	227.676	145.495	334.717	21.24	0.392154	1355.11	215.741	235.962	-20.221
Beta-Ala-Xaa dipeptidase		1		8	2	3		2	0	12.2046	0	0	47.9317	10.0341	14.7669	3.54	0.0922484	84.9374	4.06822	24.2443	-20.176
Fumarate hydratase class II	2	2		9	14	4	2	1	58.9275	24.4093	0	14.5882	53.9232	70.2388	19.6892	1.77	0.211958	241.776	27.7789	47.9504	-20.1715
Putative acetyltransferase EpsM	2	5	2	9	16	16		1	58.9275	61.0232	32.4918	0	53.9232	80.2729	78.7568	1.77	0.0915099	365.396	50.8142	70.9843	-20.1701
putative branched-chain-amino-acid aminotransferase	2			5	9	9		4	58.9275	0	0	0	29.9573	45.1535	44.3007	7.08	0.187909	178.339	19.6425	39.8039	-20.1614
Response regulator SaeR		1	3	7	7	9			0	12.2046	48.7377	0	41.9403	35.1194	44.3007	0	0.123916	182.303	20.3141	40.4535	-20.1394
Farnesyl diphosphate synthase	13	16	23	63	51	77	7	15	383.029	195.274	373.656	51.0587	377.462	255.87	379.017	26.55	0.398804	2015.37	317.32	337.45	-20.1303
CRISPR-associated endonuclease Cas1 1	2	1	2	10	7	14	1		58.9275	12.2046	32.4918	7.29411	59.9147	35.1194	68.9122	0	0.149761	274.864	34.5413	54.6488	-20.1074
Glutamyl-tRNA(Gln) amidotransferase subunit C	4	4	3	11	32	10	1	7	117.855	48.8186	48.7377	7.29411	65.9061	160.546	49.223	12.39	0.327262	498.38	71.8038	91.8917	-20.0879
Citrate synthase 2		1	2	5	12	3		2	0	12.2046	32.4918	0	29.9573	60.2047	14.7669	3.54	0.143701	149.625	14.8988	34.9763	-20.0775
Copper-exporting P-type ATPase A					12		4		0	0	0	29.1764	0	60.2047	0	0	0.18695	89.3811	0	20.0682	-20.0682
putative cell division protein YtgP					12		2		0	0	0	14.5882	0	60.2047	0	0	0.18695	74.7929	0	20.0682	-20.0682
4-hydroxythreonine-4-phosphate dehydrogenase 2					12				0	0	0	0	0	60.2047	0	0	0.18695	60.2047	0	20.0682	-20.0682
Putative septation protein SpoVG	5	8	9	22	47	17	3	5	147.319	97.6372	146.213	21.8823	131.812	235.802	83.6791	8.85	0.348231	864.345	130.39	150.431	-20.0414
UDP-N-acetyl-2-amino-2-deoxy-D-glucuronate oxidase					10	2			0	0	0	0	0	50.1706	9.8446	0	0.131196	60.0152	0	20.0051	-20.0051
Protein RecA	18	30	28	62	117	92	5	17	530.348	366.139	454.885	36.4705	371.471	586.996	452.852	30.09	0.406092	2799.16	450.457	470.44	-19.9821
CinA-like protein	1	2	2	12	6	9		3	29.4638	24.4093	32.4918	0	71.8976	30.1023	44.3007	5.31	0.0925358	232.666	28.7883	48.7669	-19.9786
Aspartyl/glutamyl-tRNA(Asn/Gln) amidotransferase subunit C	1	1	4	12	12	7		1	29.4638	12.2046	64.9836	0	71.8976	60.2047	34.4561	1.77	0.177082	273.21	35.5507	55.5195	-19.9688
Aminopeptidase PepS				5	4	2			0	0	0	0	29.9573	20.0682	9.8446	0	0.0131821	59.8702	0	19.9567	-19.9567
Thiosulfate sulfurtransferase				5	4	2			0	0	0	0	29.9573	20.0682	9.8446	0	0.0131821	59.8702	0	19.9567	-19.9567
2'-dehydrokanamycin reductase				5	3	3		1	0	0	0	0	29.9573	15.0512	14.7669	1.77	0.00825756	59.7754	0	19.9251	-19.9251
tRNA-Leu(gag)	10	11	11	35	50	42	5	14	294.638	134.251	178.705	36.4705	209.701	250.853	206.737	24.78	0.355166	1311.36	202.531	222.43	-19.8991
Proton/sodium-glutamate symport protein	2	4	6	21	12	16	2	6	58.9275	48.8186	97.4754	14.5882	125.821	60.2047	78.7568	10.62	0.231749	484.592	68.4072	88.2608	-19.8536
putative transporter YycB		13		3	34	6			0	158.66	0	0	17.9744	170.58	29.5338	0	0.398606	376.749	52.8868	72.6961	-19.8093
Regulatory protein SoxS	2	4		13	7	11			58.9275	48.8186	0	0	77.8891	35.1194	54.1453	0	0.209486	274.9	35.9154	55.7179	-19.8026
Alkaline phosphatase PhoV		4		4	6	11		1	0	48.8186	0	0	23.9659	30.1023	54.1453	1.77	0.174686	157.032	16.2729	36.0712	-19.7983
Na(+)/H(+) antiporter subunit D	2	1	5	18	1	20	1	2	58.9275	12.2046	81.2295	7.29411	107.846	5.01706	98.446	3.54	0.318808	370.965	50.7872	70.4365	-19.6493
tRNA3(Ser)-specific nuclease WapA		1		1	11	2		1	0	12.2046	0	0	5.99147	55.1876	9.8446	1.77	0.147826	83.2284	4.06822	23.6746	-19.6064
Ribonuclease E	7	5	6	31	16	32	2	3	206.246	61.0232	97.4754	14.5882	185.736	80.2729	157.514	5.31	0.367124	802.855	121.582	141.174	-19.5924
Long-chain-alcohol dehydrogenase 2	4	7	5	30	8	25	1	2	117.855	85.4325	81.2295	7.29411	179.744	40.1365	123.058	3.54	0.334068	634.749	94.839	114.313	-19.4737
Exopolysaccharide phosphotransferase CpsY		4	2	5	15	7		6	0	48.8186	32.4918	0	29.9573	75.2559	34.4561	10.62	0.196452	220.98	27.1035	46.5564	-19.453
scyllo-inositol 2-dehydrogenase (NADP(+)) IolW		1		6		7		2	0	12.2046	0	0	35.9488	0	34.4561	3.54	0.0967566	82.6096	4.06822	23.4683	-19.4001
Modulator of FtsH protease HflK	5	5	6	19	42	8	6	8	147.319	61.0232	97.4754	43.7646	113.838	210.716	39.3784	14.16	0.37244	713.515	101.939	121.311	-19.3718
ECF RNA polymerase sigma factor SigL		1	1	7	3	6		2	0	12.2046	16.2459	0	41.9403	15.0512	29.5338	3.54	0.0512779	114.976	9.48352	28.8418	-19.3582
3-methylitaconate isomerase				8		2		1	0	0	0	0	47.9317	0	9.8446	1.77	0.129003	57.7763	0	19.2588	-19.2588
putative fructoselysine utilization operon transcriptional repressor				8		2			0	0	0	0	47.9317	0	9.8446	0	0.129003	57.7763	0	19.2588	-19.2588
Putative HAD-hydrolase YfnB	3	7	6	25	22	14	1	3	88.3913	85.4325	97.4754	7.29411	149.787	110.375	68.9122	5.31	0.230395	607.668	90.4331	109.691	-19.2583
1-pyrroline-5-carboxylate dehydrogenase 1				3	4	4			0	0	0	0	17.9744	20.0682	19.6892	0	3.73773e-06	57.7318	0	19.2439	-19.2439
Phosphatase YwpJ		3	1	11	4	5			0	36.6139	16.2459	0	65.9061	20.0682	24.6115	0	0.172908	163.446	17.6199	36.862	-19.242
Phosphatidyl-myo-inositol mannosyltransferase				3	2	6		1	0	0	0	0	17.9744	10.0341	29.5338	1.77	0.0137898	57.5423	0	19.1808	-19.1808
Formamidase		1		5	4	4		1	0	12.2046	0	0	29.9573	20.0682	19.6892	1.77	0.0110543	81.9194	4.06822	23.2383	-19.17
Bifunctional adenosylcobalamin biosynthesis protein CobU		4	6	10	12	17			0	48.8186	97.4754	0	59.9147	60.2047	83.6791	0	0.273819	350.092	48.7647	67.9328	-19.1682
Glutathione import ATP-binding protein GsiA	3	3	1	14	17	6	3	1	88.3913	36.6139	16.2459	21.8823	83.8806	85.29	29.5338	1.77	0.267507	361.838	47.0837	66.2348	-19.1511
Antibiotic efflux pump outer membrane protein ArpC				3	1	7			0	0	0	0	17.9744	5.01706	34.4561	0	0.0439233	57.4476	0	19.1492	-19.1492
Oxalate-binding protein	1		3	16	4	4			29.4638	0	48.7377	0	95.8635	20.0682	19.6892	0	0.272817	213.822	26.0672	45.207	-19.1398
Toxin HigB-1		1		5	3	5		2	0	12.2046	0	0	29.9573	15.0512	24.6115	3.54	0.0163035	81.8247	4.06822	23.2067	-19.1385
Teichoic acids export ATP-binding protein TagH	5	10	4	28	26	19	2	9	147.319	122.046	64.9836	14.5882	167.761	130.444	93.5237	15.93	0.29357	740.665	111.45	130.576	-19.1265
Na(+)/H(+) antiporter NhaH				3		8		1	0	0	0	0	17.9744	0	39.3784	1.77	0.0841625	57.3528	0	19.1176	-19.1176
Dipeptide and tripeptide permease B		8		5	16	9		1	0	97.6372	0	0	29.9573	80.2729	44.3007	1.77	0.312268	252.168	32.5457	51.5103	-18.9646
Outer membrane protein SusF		4		1	13	7			0	48.8186	0	0	5.99147	65.2218	34.4561	0	0.233559	154.488	16.2729	35.2231	-18.9502
ADP-ribosyl-[dinitrogen reductase] glycohydrolase	1	3	2	6	14	10		1	29.4638	36.6139	32.4918	0	35.9488	70.2388	49.223	1.77	0.0683245	253.98	32.8565	51.8035	-18.947
HTH-type transcriptional repressor DasR				7		3			0	0	0	0	41.9403	0	14.7669	0	0.0993207	56.7072	0	18.9024	-18.9024
Cysteine synthase B		2	1	8	2	8		2	0	24.4093	16.2459	0	47.9317	10.0341	39.3784	3.54	0.11757	137.999	13.5517	32.4481	-18.8964
Aminodeoxyfutalosine nucleosidase	3	1	1	14	11	7		2	88.3913	12.2046	16.2459	0	83.8806	55.1876	34.4561	3.54	0.272466	290.366	38.9473	57.8414	-18.8942
Choline trimethylamine-lyase activating enzyme		3	1	5	8	8		2	0	36.6139	16.2459	0	29.9573	40.1365	39.3784	3.54	0.0819687	162.332	17.6199	36.4907	-18.8708
(S)-sulfolactate dehydrogenase			1	3	7	4			0	0	16.2459	0	17.9744	35.1194	19.6892	0	0.0351268	89.0289	5.4153	24.261	-18.8457
putative tRNA/rRNA methyltransferase			1	3	6	5	1	1	0	0	16.2459	7.29411	17.9744	30.1023	24.6115	1.77	0.0217012	96.2283	5.4153	24.2294	-18.8141
Lactate utilization protein A		1	1	5	8	3	1		0	12.2046	16.2459	7.29411	29.9573	40.1365	14.7669	0	0.0502933	120.605	9.48352	28.2869	-18.8034
S-formylglutathione hydrolase FrmB			1	3	5	6		1	0	0	16.2459	0	17.9744	25.0853	29.5338	1.77	0.0210752	88.8394	5.4153	24.1978	-18.7825
N-glycosidase YbiA		3		3	12	3		1	0	36.6139	0	0	17.9744	60.2047	14.7669	1.77	0.190163	129.56	12.2046	30.982	-18.7774
50S ribosomal protein L36 2		1		4	2	7	1	3	0	12.2046	0	7.29411	23.9659	10.0341	34.4561	5.31	0.0415649	87.9549	4.06822	22.8187	-18.7505
N-acetylmuramoyl-L-alanine amidase CwlM		3	2	11	4	8			0	36.6139	32.4918	0	65.9061	20.0682	39.3784	0	0.173683	194.459	23.0352	41.7843	-18.749
Iron-uptake system permease protein FeuB		2	3	10	5	9	3	4	0	24.4093	48.7377	21.8823	59.9147	25.0853	44.3007	7.08	0.170108	224.33	24.3823	43.1002	-18.7179
Phosphate transport system permease protein PstC 2		1	1	5	4	7		3	0	12.2046	16.2459	0	29.9573	20.0682	34.4561	5.31	0.0223879	112.932	9.48352	28.1606	-18.677
Pyrophosphatase PpaX	1	5	2	9	20	5	1	1	29.4638	61.0232	32.4918	7.29411	53.9232	100.341	24.6115	1.77	0.242401	309.149	40.9929	59.6253	-18.6324
Homoaconitase large subunit			1	7	6			1	0	0	16.2459	0	41.9403	30.1023	0	1.77	0.121738	88.2885	5.4153	24.0142	-18.5989
Nicotinamide-nucleotide adenylyltransferase			1	7	5	1		1	0	0	16.2459	0	41.9403	25.0853	4.9223	1.77	0.0982428	88.1938	5.4153	23.9826	-18.5673
1D-myo-inositol 2-acetamido-2-deoxy-alpha-D-glucopyranoside deacetylase				1	4	6			0	0	0	0	5.99147	20.0682	29.5338	0	0.0267833	55.5935	0	18.5312	-18.5312
Ornithine aminotransferase 2		1		3	6	4	1		0	12.2046	0	7.29411	17.9744	30.1023	19.6892	0	0.014536	87.2647	4.06822	22.5887	-18.5204
putative membrane protein YdfK	2	6	9	25	21	16	1	2	58.9275	73.2279	146.213	7.29411	149.787	105.358	78.7568	3.54	0.307815	619.564	92.7895	111.301	-18.5111
Inorganic triphosphatase	6	8	8	26	40	21	2	6	176.783	97.6372	129.967	14.5882	155.778	200.682	103.368	10.62	0.318791	878.804	134.796	153.276	-18.4806
tRNA-Asp(gtc)	6	36	16	38	103	38	4	20	176.783	439.367	259.934	29.1764	227.676	516.757	187.047	35.4	0.446765	1836.74	292.028	310.493	-18.4653
Extended-spectrum beta-lactamase PER-1		2		5	6	4		1	0	24.4093	0	0	29.9573	30.1023	19.6892	1.77	0.0525618	104.158	8.13643	26.583	-18.4465
putative 2-dehydropantoate 2-reductase			1	7		6			0	0	16.2459	0	41.9403	0	29.5338	0	0.12316	87.72	5.4153	23.8247	-18.4094
Flagellar protein FliS					11		3		0	0	0	21.8823	0	55.1876	0	0	0.18695	77.07	0	18.3959	-18.3959
Inner membrane protein YhhQ					11		3		0	0	0	21.8823	0	55.1876	0	0	0.18695	77.07	0	18.3959	-18.3959
Laccase domain protein YfiH					11		3		0	0	0	21.8823	0	55.1876	0	0	0.18695	77.07	0	18.3959	-18.3959
4'-phosphopantetheinyl transferase sfp					11				0	0	0	0	0	55.1876	0	0	0.18695	55.1876	0	18.3959	-18.3959
Helicase IV					11				0	0	0	0	0	55.1876	0	0	0.18695	55.1876	0	18.3959	-18.3959
Inner membrane protein YjiY					11				0	0	0	0	0	55.1876	0	0	0.18695	55.1876	0	18.3959	-18.3959
Muramidase-2		2		5	4	6			0	24.4093	0	0	29.9573	20.0682	29.5338	0	0.0518186	103.969	8.13643	26.5198	-18.3834
Transcriptional regulatory protein GlrR	2		2	8	2	18		2	58.9275	0	32.4918	0	47.9317	10.0341	88.6014	3.54	0.27618	237.987	30.4731	48.8558	-18.3827
L-Ala-D/L-Glu epimerase	3	8	1	13	23	13	1		88.3913	97.6372	16.2459	7.29411	77.8891	115.392	63.9899	0	0.28684	466.84	67.4248	85.7571	-18.3323
Tyrosine 2%2C3-aminomutase		1		2	9	2			0	12.2046	0	0	11.9829	45.1535	9.8446	0	0.103391	79.1857	4.06822	22.327	-18.2588
50S ribosomal protein L33 2		3		1	17		1	1	0	36.6139	0	7.29411	5.99147	85.29	0	1.77	0.288632	135.19	12.2046	30.4272	-18.2225
Undecaprenyl phosphate N%2CN'-diacetylbacillosamine 1-phosphate transferase	1	9	6	13	19	24	1	2	29.4638	109.842	97.4754	7.29411	77.8891	95.3241	118.135	3.54	0.272744	535.424	78.927	97.1161	-18.1891
Phosphate transport system permease protein PstA 2	1	2	1	10	7	6			29.4638	24.4093	16.2459	0	59.9147	35.1194	29.5338	0	0.0733638	194.687	23.373	41.5226	-18.1496
Hca operon transcriptional activator HcaR		1	1	13		1	1	1	0	12.2046	16.2459	7.29411	77.8891	0	4.9223	1.77	0.259459	118.556	9.48352	27.6038	-18.1203
Modification methylase HindIII		1	1	3	8	5		1	0	12.2046	16.2459	0	17.9744	40.1365	24.6115	1.77	0.0457811	111.173	9.48352	27.5741	-18.0906
Response regulator ArlR	4	4	19	37	27	35	1	7	117.855	48.8186	308.672	7.29411	221.684	135.461	172.281	12.39	0.418015	1012.07	158.449	176.475	-18.0266
putative acyltransferase YihG				4	5	1	3	4	0	0	0	21.8823	23.9659	25.0853	4.9223	7.08	0.0256891	75.8558	0	17.9912	-17.9912
Cadmium%2C zinc and cobalt-transporting ATPase	5	7	1	34	8	12	1	3	147.319	85.4325	16.2459	7.29411	203.71	40.1365	59.0676	5.31	0.39646	559.205	82.9991	100.971	-17.9723
Glyceraldehyde-3-phosphate dehydrogenase A	5	8	8	20	39	23	2	9	147.319	97.6372	129.967	14.5882	119.829	195.665	113.213	15.93	0.292297	818.219	124.974	142.903	-17.9281
3'%2C5'-nucleoside bisphosphate phosphatase				4	3	3			0	0	0	0	23.9659	15.0512	14.7669	0	0.00201864	53.784	0	17.928	-17.928
NADH-quinone oxidoreductase subunit K				4	2	4			0	0	0	0	23.9659	10.0341	19.6892	0	0.0061105	53.6892	0	17.8964	-17.8964
putative oxidoreductase YjhC				4	1	5		1	0	0	0	0	23.9659	5.01706	24.6115	1.77	0.0249135	53.5944	0	17.8648	-17.8648
Putative transport protein YidE		1		6	3	3			0	12.2046	0	0	35.9488	15.0512	14.7669	0	0.0462243	77.9715	4.06822	21.9223	-17.8541
DNA base-flipping protein	2	3	1	11	10	10	1	2	58.9275	36.6139	16.2459	7.29411	65.9061	50.1706	49.223	3.54	0.12787	284.381	37.2625	55.0999	-17.8375
Carbohydrate diacid regulator	4	4	2	28	12	5	1	3	117.855	48.8186	32.4918	7.29411	167.761	60.2047	24.6115	5.31	0.370762	459.037	66.3885	84.1924	-17.804
Spore coat protein SA		2	3	7	9	8		1	0	24.4093	48.7377	0	41.9403	45.1535	39.3784	1.77	0.13897	199.619	24.3823	42.1574	-17.7751
Beta-glucosidase A		3	2	8	7	8	2	6	0	36.6139	32.4918	14.5882	47.9317	35.1194	39.3784	10.62	0.109065	206.124	23.0352	40.8099	-17.7746
putative succinyl-diaminopimelate desuccinylase			2	11	1	3			0	0	32.4918	0	65.9061	5.01706	14.7669	0	0.230503	118.182	10.8306	28.5634	-17.7328
Deoxycytidine triphosphate deaminase				3	7		1	2	0	0	0	7.29411	17.9744	35.1194	0	3.54	0.0779145	60.3879	0	17.6979	-17.6979
Protoporphyrinogen oxidase		5		9	11	1		4	0	61.0232	0	0	53.9232	55.1876	4.9223	7.08	0.26867	175.056	20.3411	38.0111	-17.67
ATP-dependent Clp protease ATP-binding subunit ClpE		5	7	10	5	29		4	0	61.0232	113.721	0	59.9147	25.0853	142.747	7.08	0.365551	402.491	58.2482	75.9156	-17.6674
Octanoyltransferase	5	14	2	20	33	24	2	7	147.319	170.865	32.4918	14.5882	119.829	165.563	118.135	12.39	0.359106	768.791	116.892	134.509	-17.6173
Long-chain-alcohol dehydrogenase 1	1	1	3	8	16	3		4	29.4638	12.2046	48.7377	0	47.9317	80.2729	14.7669	7.08	0.231909	233.378	30.1354	47.6572	-17.5218
Octanoyltransferase LipM				3	1	6			0	0	0	0	17.9744	5.01706	29.5338	0	0.0343803	52.5253	0	17.5084	-17.5084
Glucuronide carrier protein		1	1	1	12	3			0	12.2046	16.2459	0	5.99147	60.2047	14.7669	0	0.186848	109.414	9.48352	26.9877	-17.5042
Selenocysteine-specific elongation factor		1	4	10	9	5	1		0	12.2046	64.9836	7.29411	59.9147	45.1535	24.6115	0	0.239323	214.162	25.7294	43.2266	-17.4972
Photosystem I P700 chlorophyll a apoprotein A2		2	1	3	12	3			0	24.4093	16.2459	0	17.9744	60.2047	14.7669	0	0.172627	133.601	13.5517	30.982	-17.4303
CRISPR pre-crRNA endoribonuclease Cas5d	4	5	10	26	15	33		7	117.855	61.0232	162.459	0	155.778	75.2559	162.436	12.39	0.345257	734.807	113.779	131.157	-17.3776
tRNA-Thr(cgt)		6	7	15	16	14	2	10	0	73.2279	113.721	14.5882	89.872	80.2729	68.9122	17.7	0.317333	440.595	62.3164	79.6857	-17.3693
Putative diacyglycerol O-acyltransferase				2	7	1			0	0	0	0	11.9829	35.1194	4.9223	0	0.065002	52.0246	0	17.3415	-17.3415
5'-fluoro-5'-deoxy-adenosine synthase				7		2			0	0	0	0	41.9403	0	9.8446	0	0.12225	51.7849	0	17.2616	-17.2616
Lipoate--protein ligase 1				2	3	5		1	0	0	0	0	11.9829	15.0512	24.6115	1.77	0.00530056	51.6456	0	17.2152	-17.2152
Acyl-CoA thioesterase YbgC		3	2	6	11	6			0	36.6139	32.4918	0	35.9488	55.1876	29.5338	0	0.142093	189.776	23.0352	40.2234	-17.1882
CRISPR-associated endonuclease Cas12a	1		1	8	1	9			29.4638	0	16.2459	0	47.9317	5.01706	44.3007	0	0.173921	142.959	15.2366	32.4165	-17.18
Peptidoglycan glycosyltransferase MrdB	10	31	11	55	28	88	2	15	294.638	378.344	178.705	14.5882	329.531	140.478	433.163	26.55	0.438115	1769.45	283.896	301.057	-17.1615
putative metabolite transport protein CsbC				2	1	7	3	8	0	0	0	21.8823	11.9829	5.01706	34.4561	14.16	0.0628383	73.3384	0	17.152	-17.152
putative copper-transporting ATPase PacS			1	3	5	5			0	0	16.2459	0	17.9744	25.0853	24.6115	0	0.0217426	83.9171	5.4153	22.5571	-17.1418
D-specific alpha-keto acid dehydrogenase		1		4	3	5		1	0	12.2046	0	0	23.9659	15.0512	24.6115	1.77	0.0141866	75.8332	4.06822	21.2095	-17.1413
putative D-lyxose ketol-isomerase		4	2	9		16		4	0	48.8186	32.4918	0	53.9232	0	78.7568	7.08	0.282388	213.99	27.1035	44.2267	-17.1232
(R)-phenyllactyl-CoA dehydratase beta subunit		1	3	8	4	9		2	0	12.2046	48.7377	0	47.9317	20.0682	44.3007	3.54	0.186142	173.243	20.3141	37.4336	-17.1194
Xaa-Pro dipeptidase	2	1	2	11	4	14	3	2	58.9275	12.2046	32.4918	21.8823	65.9061	20.0682	68.9122	3.54	0.228772	280.393	34.5413	51.6289	-17.0875
NADH oxidase	6	14	6	43	26	22	3	6	176.783	170.865	97.4754	21.8823	257.633	130.444	108.291	10.62	0.381821	963.373	148.374	165.456	-17.0814
Cobalamin adenosyltransferase	2	1		8	4	11			58.9275	12.2046	0	0	47.9317	20.0682	54.1453	0	0.229673	193.277	23.7107	40.7151	-17.0044
4-hydroxybenzoyl-CoA reductase subunit gamma				6	2	1			0	0	0	0	35.9488	10.0341	4.9223	0	0.0760063	50.9052	0	16.9684	-16.9684
Enoyl-[acyl-carrier-protein] reductase [NADH]				1	6	3			0	0	0	0	5.99147	30.1023	14.7669	0	0.036926	50.8607	0	16.9536	-16.9536
Carnitine transport ATP-binding protein OpuCA		1		3	8	1			0	12.2046	0	0	17.9744	40.1365	4.9223	0	0.100057	75.2378	4.06822	21.0111	-16.9428
Ethanolamine utilization protein EutL				6	1	2			0	0	0	0	35.9488	5.01706	9.8446	0	0.0763534	50.8105	0	16.9368	-16.9368
N-carbamoyl-L-amino acid hydrolase		1		8	3				0	12.2046	0	0	47.9317	15.0512	0	0	0.157211	75.1876	4.06822	20.9943	-16.9261
Fructose import binding protein FrcB				6		3		1	0	0	0	0	35.9488	0	14.7669	1.77	0.0902261	50.7157	0	16.9052	-16.9052
Arabinogalactan endo-beta-1%2C4-galactanase		2			13	2			0	24.4093	0	0	0	65.2218	9.8446	0	0.241568	99.4757	8.13643	25.0221	-16.8857
50S ribosomal protein L25	7	12	11	30	38	43	2	13	206.246	146.456	178.705	14.5882	179.744	190.648	211.659	23.01	0.219392	1128.05	177.136	194.017	-16.8814
Type-2 restriction enzyme DpnI				1	3	6		1	0	0	0	0	5.99147	15.0512	29.5338	1.77	0.0348827	50.5765	0	16.8588	-16.8588
Cobalt-factor III methyltransferase			1	7		5		1	0	0	16.2459	0	41.9403	0	24.6115	1.77	0.138239	82.7977	5.4153	22.1839	-16.7686
tRNA-Ser(cag)					10		4		0	0	0	29.1764	0	50.1706	0	0	0.18695	79.347	0	16.7235	-16.7235
Putative type-1 restriction enzyme specificity protein MPN_089					10		2		0	0	0	14.5882	0	50.1706	0	0	0.18695	64.7588	0	16.7235	-16.7235
Putative ribitol-5-phosphate cytidylyltransferase					10				0	0	0	0	0	50.1706	0	0	0.18695	50.1706	0	16.7235	-16.7235
Putative sigma-54 modulation protein					10				0	0	0	0	0	50.1706	0	0	0.18695	50.1706	0	16.7235	-16.7235
Putative transcriptional regulator YvhJ					10				0	0	0	0	0	50.1706	0	0	0.18695	50.1706	0	16.7235	-16.7235
Serine/threonine-protein kinase HipA					10				0	0	0	0	0	50.1706	0	0	0.18695	50.1706	0	16.7235	-16.7235
mRNA interferase YafQ					10				0	0	0	0	0	50.1706	0	0	0.18695	50.1706	0	16.7235	-16.7235
D-allose-binding periplasmic protein	1		1	11	4	2		1	29.4638	0	16.2459	0	65.9061	20.0682	9.8446	1.77	0.217023	141.529	15.2366	31.9397	-16.7031
GTPase Obg	6	21	19	39	72	40	1	10	176.783	256.298	308.672	7.29411	233.667	361.228	196.892	17.7	0.401913	1540.83	247.251	263.929	-16.6784
Atrazine chlorohydrolase	3	1		11	11	6	1	1	88.3913	12.2046	0	7.29411	65.9061	55.1876	29.5338	1.77	0.302122	258.518	33.532	50.2092	-16.6772
RNA polymerase sigma-E factor	3	8	5	13	33	15	1	7	88.3913	97.6372	81.2295	7.29411	77.8891	165.563	73.8345	12.39	0.305665	591.839	89.086	105.762	-16.6762
Acyl carrier protein AcpP					8	2			0	0	0	0	0	40.1365	9.8446	0	0.119923	49.9811	0	16.6604	-16.6604
Chaperone protein dnaK2		1	1	4	3	8		2	0	12.2046	16.2459	0	23.9659	15.0512	39.3784	3.54	0.0628392	106.846	9.48352	26.1318	-16.6483
AB hydrolase superfamily protein YdjP		1		2	9	1	1	1	0	12.2046	0	7.29411	11.9829	45.1535	4.9223	1.77	0.135959	81.5575	4.06822	20.6863	-16.618
putative sensor-like histidine kinase YedV		1		2	9	1			0	12.2046	0	0	11.9829	45.1535	4.9223	0	0.135959	74.2634	4.06822	20.6863	-16.618
Peptidoglycan deacetylase				5	2	2			0	0	0	0	29.9573	10.0341	9.8446	0	0.033761	49.8361	0	16.612	-16.612
Endoglucanase C307			2	2	14				0	0	32.4918	0	11.9829	70.2388	0	0	0.265868	114.714	10.8306	27.4072	-16.5767
High-molecular-weight cytochrome c				5		4			0	0	0	0	29.9573	0	19.6892	0	0.0664227	49.6465	0	16.5488	-16.5488
Putative type II secretion system protein E	3	2	1	9	18	7		1	88.3913	24.4093	16.2459	0	53.9232	90.307	34.4561	1.77	0.293643	307.733	43.0155	59.5621	-16.5466
Glycine/sarcosine/betaine reductase complex component C subunit beta		1		7		4			0	12.2046	0	0	41.9403	0	19.6892	0	0.133419	73.8341	4.06822	20.5432	-16.4749
N-acetylmuramoyl-L-alanine amidase sle1		1		2	4	6			0	12.2046	0	0	11.9829	20.0682	29.5338	0	0.0322758	73.7896	4.06822	20.5283	-16.4601
Sporulation integral membrane protein YlbJ	2	7	7	18	28	12	1	2	58.9275	85.4325	113.721	7.29411	107.846	140.478	59.0676	3.54	0.297247	572.767	86.0271	102.464	-16.4368
Choline trimethylamine-lyase	6	8	7	35	13	33	1	4	176.783	97.6372	113.721	7.29411	209.701	65.2218	162.436	7.08	0.377075	832.794	129.38	145.786	-16.406
tRNA-His(gtg)	10	17	18	36	82	44	9	20	294.638	207.479	292.426	65.647	215.693	411.399	216.581	35.4	0.414603	1703.86	264.848	281.224	-16.3767
Light-independent protochlorophyllide reductase iron-sulfur ATP-binding protein				4	5			1	0	0	0	0	23.9659	25.0853	0	1.77	0.0581618	49.0512	0	16.3504	-16.3504
L-threonine 3-dehydrogenase	4	5	6	17	21	24	2	5	117.855	61.0232	97.4754	14.5882	101.855	105.358	118.135	8.85	0.199846	616.29	92.1179	108.449	-16.3316
GTP-sensing transcriptional pleiotropic repressor CodY	1	2		8	8	3	1	2	29.4638	24.4093	0	7.29411	47.9317	40.1365	14.7669	3.54	0.147049	164.002	17.9577	34.2784	-16.3207
Glycerophosphodiester phosphodiesterase	1	15	2	21	8	26	1	3	29.4638	183.07	32.4918	7.29411	125.821	40.1365	127.98	5.31	0.396934	546.257	81.6751	97.979	-16.304
8-oxoguanine deaminase				4	3	2			0	0	0	0	23.9659	15.0512	9.8446	0	0.00840695	48.8616	0	16.2872	-16.2872
endonuclease 4	2	2	4	8	15	15		4	58.9275	24.4093	64.9836	0	47.9317	75.2559	73.8345	7.08	0.176268	345.343	49.4401	65.674	-16.2339
Aerobic cobaltochelatase subunit CobN			2	2	2	12			0	0	32.4918	0	11.9829	10.0341	59.0676	0	0.224772	113.576	10.8306	27.0282	-16.1976
Aminoglycoside N(6')-acetyltransferase type 1				4		5			0	0	0	0	23.9659	0	24.6115	0	0.0580934	48.5774	0	16.1925	-16.1925
Protease 1		1		1	6	5			0	12.2046	0	0	5.99147	30.1023	24.6115	0	0.0625245	72.91	4.06822	20.2351	-16.1669
Putative 2-dehydropantoate 2-reductase		1		6	1	4			0	12.2046	0	0	35.9488	5.01706	19.6892	0	0.0876258	72.8597	4.06822	20.2184	-16.1501
Bifunctional PGK/TIM		4	2	5	13	7	1	1	0	48.8186	32.4918	7.29411	29.9573	65.2218	34.4561	1.77	0.212228	218.24	27.1035	43.2117	-16.1083
L-seryl-tRNA(Sec) selenium transferase	1	1	3	9	10	7			29.4638	12.2046	48.7377	0	53.9232	50.1706	34.4561	0	0.128031	228.956	30.1354	46.1833	-16.0479
Iron-sulfur cluster repair protein ScdA		2		3	4	7			0	24.4093	0	0	17.9744	20.0682	34.4561	0	0.0859358	96.908	8.13643	24.1662	-16.0298
Tryptophan--tRNA ligase 2	3	1		9	13	6		2	88.3913	12.2046	0	0	53.9232	65.2218	29.5338	3.54	0.30842	249.275	33.532	49.5596	-16.0276
5-aminovalerate aminotransferase DavT		4		7	8	3			0	48.8186	0	0	41.9403	40.1365	14.7669	0	0.217689	145.662	16.2729	32.2812	-16.0084
3-oxo-tetronate 4-phosphate decarboxylase	2	1	1	11	6	8		1	58.9275	12.2046	16.2459	0	65.9061	30.1023	39.3784	1.77	0.216741	222.765	29.126	45.129	-16.0029
ATP-dependent protease subunit ClpQ				3	2	4			0	0	0	0	17.9744	10.0341	19.6892	0	0.00295075	47.6977	0	15.8992	-15.8992
putative membrane protein EpsK				3	2	4			0	0	0	0	17.9744	10.0341	19.6892	0	0.00295075	47.6977	0	15.8992	-15.8992
2-dehydro-3%2C6-dideoxy-6-sulfogluconate aldolase				3	1	5			0	0	0	0	17.9744	5.01706	24.6115	0	0.0254815	47.603	0	15.8677	-15.8677
Sialidase B				3		6			0	0	0	0	17.9744	0	29.5338	0	0.0695552	47.5082	0	15.8361	-15.8361
S-adenosylmethionine/S-adenosylhomocysteine transporter		4		6	11	1			0	48.8186	0	0	35.9488	55.1876	4.9223	0	0.255863	144.877	16.2729	32.0196	-15.7467
Chondroitin sulfate ABC exolyase		2		2	6	6			0	24.4093	0	0	11.9829	30.1023	29.5338	0	0.0967234	96.0284	8.13643	23.873	-15.7366
Phenol regulator MopR		1			3	9			0	12.2046	0	0	0	15.0512	44.3007	0	0.15651	71.5565	4.06822	19.784	-15.7157
Putative NAD(P)H nitroreductase YodC		1	1	1	7	7			0	12.2046	16.2459	0	5.99147	35.1194	34.4561	0	0.10928	104.018	9.48352	25.189	-15.7055
Pyridoxine kinase		3	1	5	11	3		1	0	36.6139	16.2459	0	29.9573	55.1876	14.7669	1.77	0.189175	152.772	17.6199	33.304	-15.684
Endoglucanase Z		6		5	18				0	73.2279	0	0	29.9573	90.307	0	0	0.343112	193.492	24.4093	40.0881	-15.6788
putative HTH-type transcriptional regulator YfiR				2	6	1		1	0	0	0	0	11.9829	30.1023	4.9223	1.77	0.0524429	47.0076	0	15.6692	-15.6692
putative N-acetyltransferase YjcF				2	6	1			0	0	0	0	11.9829	30.1023	4.9223	0	0.0524429	47.0076	0	15.6692	-15.6692
Plasmid-derived single-stranded DNA-binding protein		3	2	2	8	13		1	0	36.6139	32.4918	0	11.9829	40.1365	63.9899	1.77	0.227664	185.215	23.0352	38.7031	-15.6679
Urease subunit gamma	1	1	8	11	1	30		2	29.4638	12.2046	129.967	0	65.9061	5.01706	147.669	3.54	0.395561	390.228	57.2119	72.8641	-15.6522
Beta-1%2C3-xylanase XYL4				2	5	2			0	0	0	0	11.9829	25.0853	9.8446	0	0.0152152	46.9128	0	15.6376	-15.6376
Carboxy-terminal processing protease CtpA	1	3	8	14	15	17		2	29.4638	36.6139	129.967	0	83.8806	75.2559	83.6791	3.54	0.328245	438.86	65.3483	80.9385	-15.5902
NAD-dependent malic enzyme	5	15	3	27	33	20	2	6	147.319	183.07	48.7377	14.5882	161.77	165.563	98.446	10.62	0.375347	819.493	126.375	141.926	-15.5508
Chondroitin sulfate ABC endolyase				2	2	5			0	0	0	0	11.9829	10.0341	24.6115	0	0.0136169	46.6286	0	15.5429	-15.5429
Lipid III flippase				2	1	6		1	0	0	0	0	11.9829	5.01706	29.5338	1.77	0.0502961	46.5338	0	15.5113	-15.5113
N-acyl-L-amino acid amidohydrolase				2	1	6			0	0	0	0	11.9829	5.01706	29.5338	0	0.0502961	46.5338	0	15.5113	-15.5113
AMP nucleosidase		4			19				0	48.8186	0	0	0	95.3241	0	0	0.343258	144.143	16.2729	31.7747	-15.5018
Dihydrolipoyllysine-residue acetyltransferase component of acetoin cleaving system		1		4	3	4	1	3	0	12.2046	0	7.29411	23.9659	15.0512	19.6892	5.31	0.0161442	78.205	4.06822	19.5688	-15.5005
8-amino-7-oxononanoate synthase/2-amino-3-ketobutyrate coenzyme A ligase				2		7			0	0	0	0	11.9829	0	34.4561	0	0.100051	46.439	0	15.4797	-15.4797
Energy-coupling factor transporter transmembrane protein EcfT	9	22	32	79	67	59	4	13	265.174	268.502	519.869	29.1764	473.326	336.143	290.416	23.01	0.442743	2182.61	351.182	366.628	-15.4466
ABC transporter ATP-binding protein YxdL	3	6	1	15	14	13		4	88.3913	73.2279	16.2459	0	89.872	70.2388	63.9899	7.08	0.272281	401.966	59.2884	74.7003	-15.4119
Kynurenine formamidase			2	4	6	5		4	0	0	32.4918	0	23.9659	30.1023	24.6115	7.08	0.117175	111.172	10.8306	26.2266	-15.396
Histidinol-phosphate aminotransferase 2				1	8				0	0	0	0	5.99147	40.1365	0	0	0.14304	46.1279	0	15.376	-15.376
Shikimate kinase 1	4	3	3	20	16	10	5	4	117.855	36.6139	48.7377	36.4705	119.829	80.2729	49.223	7.08	0.330536	489.003	67.7356	83.1084	-15.3729
Arabinose metabolism transcriptional repressor			3	10	5	2			0	0	48.7377	0	59.9147	25.0853	9.8446	0	0.261546	143.582	16.2459	31.6149	-15.369
tRNA-Ala(ggc)	2	2	5	6	25	10		3	58.9275	24.4093	81.2295	0	35.9488	125.426	49.223	5.31	0.33029	375.165	54.8554	70.1994	-15.344
UDP-N-acetyl-alpha-D-glucosamine C6 dehydratase	7	16	9	31	46	36	2	4	206.246	195.274	146.213	14.5882	185.736	230.785	177.203	7.08	0.285254	1156.05	182.578	197.908	-15.3298
Antitoxin PezA		1	2	6	6	5		1	0	12.2046	32.4918	0	35.9488	30.1023	24.6115	1.77	0.100575	135.359	14.8988	30.2209	-15.3221
putative outer membrane usher protein EcpC				1	6	2			0	0	0	0	5.99147	30.1023	9.8446	0	0.054987	45.9384	0	15.3128	-15.3128
Ribosome-associated factor Y		1		3	8		1		0	12.2046	0	7.29411	17.9744	40.1365	0	0	0.140693	77.6096	4.06822	19.3703	-15.3021
Diphtheria toxin repressor				1	5	3		1	0	0	0	0	5.99147	25.0853	14.7669	1.77	0.0251813	45.8437	0	15.2812	-15.2812
Corrinoid/iron-sulfur protein small subunit				1	5	3			0	0	0	0	5.99147	25.0853	14.7669	0	0.0251813	45.8437	0	15.2812	-15.2812
Purine nucleoside phosphoramidase	5	2	7	22	27	13	3	5	147.319	24.4093	113.721	21.8823	131.812	135.461	63.9899	8.85	0.371398	638.594	95.1498	110.421	-15.2711
Glycine/sarcosine/betaine reductase complex component C subunit alpha				6		2			0	0	0	0	35.9488	0	9.8446	0	0.113885	45.7934	0	15.2645	-15.2645
ECF RNA polymerase sigma factor SigK		1		3	6	2		3	0	12.2046	0	0	17.9744	30.1023	9.8446	5.31	0.0501119	70.126	4.06822	19.3071	-15.2389
ATP-dependent protease ATPase subunit ClpY		1	3	2	11	8		2	0	12.2046	48.7377	0	11.9829	55.1876	39.3784	3.54	0.237794	167.491	20.3141	35.5163	-15.2022
putative S-adenosylmethionine-dependent methyltransferase				1	2	6		2	0	0	0	0	5.99147	10.0341	29.5338	3.54	0.0524448	45.5594	0	15.1865	-15.1865
Soluble hydrogenase 42 kDa subunit				1	2	6			0	0	0	0	5.99147	10.0341	29.5338	0	0.0524448	45.5594	0	15.1865	-15.1865
Sec-independent protein translocase protein TatAd		1		3	4	4			0	12.2046	0	0	17.9744	20.0682	19.6892	0	0.0105609	69.9365	4.06822	19.2439	-15.1757
Serine/threonine-protein kinase toxin HipA	2	9	2	9	9	30		1	58.9275	109.842	32.4918	0	53.9232	45.1535	147.669	1.77	0.361617	448.007	67.087	82.2486	-15.1615
Alpha-galactosidase Mel36A		1		3	3	5		1	0	12.2046	0	0	17.9744	15.0512	24.6115	1.77	0.0188946	69.8417	4.06822	19.2124	-15.1441
Beta-peptidyl aminopeptidase BapA			1	7		4			0	0	16.2459	0	41.9403	0	19.6892	0	0.158954	77.8754	5.4153	20.5432	-15.1279
Cyclic pyranopterin monophosphate synthase accessory protein					9		3		0	0	0	21.8823	0	45.1535	0	0	0.18695	67.0358	0	15.0512	-15.0512
Flagellar biosynthetic protein FliR					9		3		0	0	0	21.8823	0	45.1535	0	0	0.18695	67.0358	0	15.0512	-15.0512
2-oxoglutaramate amidase					9		1		0	0	0	7.29411	0	45.1535	0	0	0.18695	52.4476	0	15.0512	-15.0512
putative diguanylate cyclase YedQ					9		1		0	0	0	7.29411	0	45.1535	0	0	0.18695	52.4476	0	15.0512	-15.0512
Gamma-D-glutamyl-L-lysine endopeptidase					9				0	0	0	0	0	45.1535	0	0	0.18695	45.1535	0	15.0512	-15.0512
Putative N-acetylmannosaminyltransferase					9				0	0	0	0	0	45.1535	0	0	0.18695	45.1535	0	15.0512	-15.0512
putative ribose-5-phosphate isomerase B					9				0	0	0	0	0	45.1535	0	0	0.18695	45.1535	0	15.0512	-15.0512
putative FtsW-like protein	1	5	3	15	10	9		1	29.4638	61.0232	48.7377	0	89.872	50.1706	44.3007	1.77	0.21323	323.568	46.4082	61.4478	-15.0395
Endoglucanase C					7	2		1	0	0	0	0	0	35.1194	9.8446	1.77	0.112572	44.964	0	14.988	-14.988
Mercuric transport protein periplasmic component					7	2			0	0	0	0	0	35.1194	9.8446	0	0.112572	44.964	0	14.988	-14.988
Penicillin-binding protein A	1	8	1	14	11	10		1	29.4638	97.6372	16.2459	0	83.8806	55.1876	49.223	1.77	0.306761	331.638	47.7823	62.7637	-14.9815
(R)-stereoselective amidase		1		2	9		1		0	12.2046	0	7.29411	11.9829	45.1535	0	0	0.174068	76.6352	4.06822	19.0455	-14.9773
Ribulose-5-phosphate reductase 1				5	1	2			0	0	0	0	29.9573	5.01706	9.8446	0	0.0610424	44.819	0	14.9397	-14.9397
tRNA 2-selenouridine synthase	1	4	5	10	17	12			29.4638	48.8186	81.2295	0	59.9147	85.29	59.0676	0	0.219513	363.784	53.1706	68.0908	-14.9201
DnaJ-like protein DjlA		1	1	3	10	1			0	12.2046	16.2459	0	17.9744	50.1706	4.9223	0	0.178611	101.518	9.48352	24.3558	-14.8722
O-antigen biosynthesis glycosyltransferase WbnK		1		2	5	4			0	12.2046	0	0	11.9829	25.0853	19.6892	0	0.0279871	68.9621	4.06822	18.9191	-14.8509
Protein YdcF	2	1		16	1	3		2	58.9275	12.2046	0	0	95.8635	5.01706	14.7669	3.54	0.342249	186.78	23.7107	38.5492	-14.8384
Proteasome-associated ATPase		1		7		3		7	0	12.2046	0	0	41.9403	0	14.7669	12.39	0.157754	68.9118	4.06822	18.9024	-14.8342
Glycerate 2-kinase	3	7	4	19	21	13	4	4	88.3913	85.4325	64.9836	29.1764	113.838	105.358	63.9899	7.08	0.217484	551.17	79.6025	94.3953	-14.7929
tRNA-Leu(caa)	9	18	14	34	69	42	1	9	265.174	219.684	227.443	7.29411	203.71	346.177	206.737	15.93	0.389126	1476.22	237.433	252.208	-14.7745
Propanediol utilization protein PduU			1	6		5			0	0	16.2459	0	35.9488	0	24.6115	0	0.141378	76.8062	5.4153	20.1868	-14.7715
Putative transport protein	6	15	8	38	13	49	2	3	176.783	183.07	129.967	14.5882	227.676	65.2218	241.193	5.31	0.40736	1038.5	163.273	178.03	-14.757
Methylmalonyl-CoA carboxyltransferase 12S subunit	2	6		12	12	9		3	58.9275	73.2279	0	0	71.8976	60.2047	44.3007	5.31	0.284452	308.558	44.0518	58.801	-14.7492
Gamma-D-glutamyl-L-diamino acid endopeptidase 1		2		4	4	5			0	24.4093	0	0	23.9659	20.0682	24.6115	0	0.0743795	93.0549	8.13643	22.8819	-14.7454
Yop proteins translocation protein C	1			4	5	5		1	29.4638	0	0	0	23.9659	25.0853	24.6115	1.77	0.104087	103.126	9.82125	24.5542	-14.733
Global nitrogen regulator		3		1	10	5			0	36.6139	0	0	5.99147	50.1706	24.6115	0	0.226074	117.387	12.2046	26.9245	-14.7199
Response regulator protein GraR		3		6	5	4		2	0	36.6139	0	0	35.9488	25.0853	19.6892	3.54	0.162386	117.337	12.2046	26.9078	-14.7031
Tungstate uptake system ATP-binding protein TupC		3		6	5	4		1	0	36.6139	0	0	35.9488	25.0853	19.6892	1.77	0.162386	117.337	12.2046	26.9078	-14.7031
Inner membrane ABC transporter permease protein YcjO		2	3	8	4	10		2	0	24.4093	48.7377	0	47.9317	20.0682	49.223	3.54	0.217881	190.37	24.3823	39.0743	-14.692
Nicotinate dehydrogenase FAD-subunit				4	4			1	0	0	0	0	23.9659	20.0682	0	1.77	0.0596118	44.0341	0	14.678	-14.678
tRNA-Tyr(ata)				4	4				0	0	0	0	23.9659	20.0682	0	0	0.0596118	44.0341	0	14.678	-14.678
Levansucrase				4	3	1	2	1	0	0	0	14.5882	23.9659	15.0512	4.9223	1.77	0.0281234	58.5276	0	14.6464	-14.6464
Histidine protein kinase SaeS	1		1	10	2	4			29.4638	0	16.2459	0	59.9147	10.0341	19.6892	0	0.224789	135.348	15.2366	29.8793	-14.6428
Alkaline phosphatase synthesis transcriptional regulatory protein SphR	1	1	1	12	4	2			29.4638	12.2046	16.2459	0	71.8976	20.0682	9.8446	0	0.251507	159.725	19.3048	33.9368	-14.632
Aerobic C4-dicarboxylate transport protein		1		6	3	1		3	0	12.2046	0	0	35.9488	15.0512	4.9223	5.31	0.109382	68.1269	4.06822	18.6408	-14.5725
Nisin biosynthesis protein NisB				4		4			0	0	0	0	23.9659	0	19.6892	0	0.0599599	43.6551	0	14.5517	-14.5517
3-aminobutyryl-CoA ammonia lyase	1			3	9	2		1	29.4638	0	0	0	17.9744	45.1535	9.8446	1.77	0.186999	102.436	9.82125	24.3242	-14.5029
Alcohol dehydrogenase		2		8	3	1		2	0	24.4093	0	0	47.9317	15.0512	4.9223	3.54	0.198783	92.3145	8.13643	22.6351	-14.4986
N-acetylmuramate/N-acetylglucosamine kinase			1	5	2	4		1	0	0	16.2459	0	29.9573	10.0341	19.6892	1.77	0.0703982	75.9266	5.4153	19.8936	-14.4783
Xanthosine permease		1		1	4	6			0	12.2046	0	0	5.99147	20.0682	29.5338	0	0.0716515	67.7982	4.06822	18.5312	-14.463
Alpha-xylosidase		2	3	3	1	19		4	0	24.4093	48.7377	0	17.9744	5.01706	93.5237	7.08	0.332508	189.662	24.3823	38.8384	-14.4561
L-glutamyl-[BtrI acyl-carrier protein] decarboxylase		1	1	7	3	3			0	12.2046	16.2459	0	41.9403	15.0512	14.7669	0	0.115875	100.209	9.48352	23.9195	-14.4359
UDP-2-acetamido-2-deoxy-3-oxo-D-glucuronate aminotransferase			3	2	11	5			0	0	48.7377	0	11.9829	55.1876	24.6115	0	0.263167	140.52	16.2459	30.594	-14.3481
Photosystem I iron-sulfur center		1	2	8	4	4		2	0	12.2046	32.4918	0	47.9317	20.0682	19.6892	3.54	0.171163	132.386	14.8988	29.2297	-14.3309
Citrate synthase	4	6	5	26	21	11	2	4	117.855	73.2279	81.2295	14.5882	155.778	105.358	54.1453	7.08	0.340626	602.182	90.7708	105.094	-14.3231
6-aminohexanoate-dimer hydrolase		1			10	1			0	12.2046	0	0	0	50.1706	4.9223	0	0.217267	67.2975	4.06822	18.3643	-14.2961
Dipeptide permease D				3	3	2			0	0	0	0	17.9744	15.0512	9.8446	0	0.0019289	42.8702	0	14.2901	-14.2901
NADH-quinone oxidoreductase subunit J				3	3	2			0	0	0	0	17.9744	15.0512	9.8446	0	0.0019289	42.8702	0	14.2901	-14.2901
putative N-acetyl-alpha-D-glucosaminyl L-malate deacetylase 2				3	3	2			0	0	0	0	17.9744	15.0512	9.8446	0	0.0019289	42.8702	0	14.2901	-14.2901
10 kDa chaperonin	10	17	14	40	64	43	6	9	294.638	207.479	227.443	43.7646	239.659	321.092	211.659	15.93	0.37573	1545.73	243.186	257.47	-14.2834
GDP-mannose:cellobiosyl-diphosphopolyprenol alpha-mannosyltransferase				3	2	3	1	1	0	0	0	7.29411	17.9744	10.0341	14.7669	1.77	0.00173877	50.0695	0	14.2585	-14.2585
Chorismate mutase AroH		1			6	5		1	0	12.2046	0	0	0	30.1023	24.6115	1.77	0.116841	66.9185	4.06822	18.238	-14.1697
HTH-type transcriptional repressor RghR			1	4	3	4		1	0	0	16.2459	0	23.9659	15.0512	19.6892	1.77	0.0388107	74.9522	5.4153	19.5688	-14.1535
Adenylate cyclase 2		1	5	11	11	3		2	0	12.2046	81.2295	0	65.9061	55.1876	14.7669	3.54	0.329388	229.295	31.1447	45.2869	-14.1422
Neopullulanase 1	1		1	8	8				29.4638	0	16.2459	0	47.9317	40.1365	0	0	0.227935	133.778	15.2366	29.3561	-14.1195
Nicotinamide riboside transporter PnuC	5	8	10	26	37	22	2	5	147.319	97.6372	162.459	14.5882	155.778	185.631	108.291	8.85	0.330644	871.703	135.805	149.9	-14.095
Pantothenate transporter PanT				2	6			1	0	0	0	0	11.9829	30.1023	0	1.77	0.0920671	42.0853	0	14.0284	-14.0284
tRNA (adenine(22)-N(1))-methyltransferase	4	6	11	33	26	17	2	2	117.855	73.2279	178.705	14.5882	197.718	130.444	83.6791	3.54	0.38562	796.217	123.263	137.28	-14.0178
Aminopentol aminotransferase				2	5	1		2	0	0	0	0	11.9829	25.0853	4.9223	3.54	0.0384301	41.9905	0	13.9968	-13.9968
HTH-type transcriptional regulator KdgR	1	1		9	2	4			29.4638	12.2046	0	0	53.9232	10.0341	19.6892	0	0.213231	125.315	13.8895	27.8822	-13.9927
NAD-dependent dihydropyrimidine dehydrogenase subunit PreT				2	4	2			0	0	0	0	11.9829	20.0682	9.8446	0	0.005471	41.8958	0	13.9653	-13.9653
putative uridylyltransferase		1		4	6			2	0	12.2046	0	0	23.9659	30.1023	0	3.54	0.118546	66.2729	4.06822	18.0227	-13.9545
NAD(P)H-quinone oxidoreductase chain 4 1				2	3	3			0	0	0	0	11.9829	15.0512	14.7669	0	7.07139e-05	41.801	0	13.9337	-13.9337
D-allose transport system permease protein AlsC		2	2	9	5	4		2	0	24.4093	32.4918	0	53.9232	25.0853	19.6892	3.54	0.194527	155.599	18.967	32.8992	-13.9322
Biotinylated protein TB7.3		1		4	4	2		1	0	12.2046	0	0	23.9659	20.0682	9.8446	1.77	0.0383012	66.0834	4.06822	17.9596	-13.8914
putative lipoprotein aminopeptidase LpqL				2	1	5			0	0	0	0	11.9829	5.01706	24.6115	0	0.0364316	41.6115	0	13.8705	-13.8705
putative nicotinate-nucleotide pyrophosphorylase [carboxylating]		3	8	4	22	15		1	0	36.6139	129.967	0	23.9659	110.375	73.8345	1.77	0.389267	374.757	55.527	69.3919	-13.8648
tRNA-Pyl(cta)		1		4	3	3	1	1	0	12.2046	0	7.29411	23.9659	15.0512	14.7669	1.77	0.0260739	73.2827	4.06822	17.928	-13.8598
Lipoate-protein ligase LplJ		1	3	3	9	8			0	12.2046	48.7377	0	17.9744	45.1535	39.3784	0	0.228127	163.449	20.3141	34.1688	-13.8547
Anaerobic sulfite reductase subunit C	2	5	1	13	15	5	2	1	58.9275	61.0232	16.2459	14.5882	77.8891	75.2559	24.6115	1.77	0.28699	328.541	45.3989	59.2522	-13.8533
Hydrogen cyanide synthase subunit HcnC		1	1	5	7	1		1	0	12.2046	16.2459	0	29.9573	35.1194	4.9223	1.77	0.129309	98.4496	9.48352	23.333	-13.8495
Acetylene hydratase			1	8		2		1	0	0	16.2459	0	47.9317	0	9.8446	1.77	0.212315	74.0222	5.4153	19.2588	-13.8435
putative DHNTP pyrophosphohydrolase				2		6		2	0	0	0	0	11.9829	0	29.5338	3.54	0.0909482	41.5167	0	13.8389	-13.8389
Localization factor PodJL				2		6		1	0	0	0	0	11.9829	0	29.5338	1.77	0.0909482	41.5167	0	13.8389	-13.8389
Capsular polysaccharide phosphotransferase SacB		2		1	9	3		3	0	24.4093	0	0	5.99147	45.1535	14.7669	5.31	0.195355	90.3212	8.13643	21.9706	-13.8342
Alanine racemase 2		1		4	2	4		3	0	12.2046	0	0	23.9659	10.0341	19.6892	5.31	0.0376602	65.8938	4.06822	17.8964	-13.8282
Oligo-1%2C6-glucosidase	4	5	5	22	24	10	2	5	117.855	61.0232	81.2295	14.5882	131.812	120.409	49.223	8.85	0.338545	576.141	86.7026	100.482	-13.779
1%2C4-dihydroxy-2-naphthoate octaprenyltransferase	5	8	6	14	48	12	2	3	147.319	97.6372	97.4754	14.5882	83.8806	240.819	59.0676	5.31	0.41379	740.787	114.144	127.922	-13.7785
D-erythronate 4-phosphate dehydrogenase			1	3	2	6		2	0	0	16.2459	0	17.9744	10.0341	29.5338	3.54	0.0768696	73.7882	5.4153	19.1808	-13.7655
putative RNA methyltransferase		1	1	5	3	5		2	0	12.2046	16.2459	0	29.9573	15.0512	24.6115	3.54	0.0520433	98.0706	9.48352	23.2067	-13.7232
D-alanine aminotransferase		2	1	7	5	3		3	0	24.4093	16.2459	0	41.9403	25.0853	14.7669	5.31	0.134354	122.448	13.5517	27.2642	-13.7124
Anaerobic glycerol-3-phosphate dehydrogenase subunit C				1	7				0	0	0	0	5.99147	35.1194	0	0	0.137534	41.1109	0	13.7036	-13.7036
Proton/glutamate-aspartate symporter	13	11	7	62	4	57		5	383.029	134.251	113.721	0	371.471	20.0682	280.571	8.85	0.462381	1303.11	210.334	224.037	-13.7031
Gamma-glutamylputrescine synthetase PuuA				1	6	1			0	0	0	0	5.99147	30.1023	4.9223	0	0.0858158	41.0161	0	13.672	-13.672
Beta-fructosidase				1	5	2		1	0	0	0	0	5.99147	25.0853	9.8446	1.77	0.0396938	40.9214	0	13.6405	-13.6405
Corrinoid/iron-sulfur protein large subunit				1	5	2			0	0	0	0	5.99147	25.0853	9.8446	0	0.0396938	40.9214	0	13.6405	-13.6405
Isochorismate synthase EntC		4			12	6			0	48.8186	0	0	0	60.2047	29.5338	0	0.298696	138.557	16.2729	29.9128	-13.64
Putative DNA-binding proteinA				6		1			0	0	0	0	35.9488	0	4.9223	0	0.146324	40.8711	0	13.6237	-13.6237
Na(+)/H(+) antiporter subunit B		2	1	7	2	6		1	0	24.4093	16.2459	0	41.9403	10.0341	29.5338	1.77	0.155196	122.163	13.5517	27.1694	-13.6177
Peptidoglycan DL-endopeptidase CwlO				1	4	3		1	0	0	0	0	5.99147	20.0682	14.7669	1.77	0.0147516	40.8266	0	13.6089	-13.6089
Acetyl esterase Axe7A				1	4	3			0	0	0	0	5.99147	20.0682	14.7669	0	0.0147516	40.8266	0	13.6089	-13.6089
Cation efflux system protein CusB	2	3	1	8	13	8	1	2	58.9275	36.6139	16.2459	7.29411	47.9317	65.2218	39.3784	3.54	0.200698	271.613	37.2625	50.844	-13.5815
Transcriptional regulatory protein BasR		1		8	1				0	12.2046	0	0	47.9317	5.01706	0	0	0.218504	65.1535	4.06822	17.6496	-13.5814
3 beta-hydroxysteroid dehydrogenase/Delta 5-->4-isomerase		2			10	3	3	1	0	24.4093	0	21.8823	0	50.1706	14.7669	1.77	0.235212	111.229	8.13643	21.6458	-13.5094
primosomal protein N'			1	2	5	4			0	0	16.2459	0	11.9829	25.0853	19.6892	0	0.0554153	73.0033	5.4153	18.9191	-13.5038
AP-4-A phosphorylase		1		3	3	4			0	12.2046	0	0	17.9744	15.0512	19.6892	0	0.017267	64.9194	4.06822	17.5716	-13.5034
Phosphate-import permease protein PhnE	2	14	2	19	20	18	1	4	58.9275	170.865	32.4918	7.29411	113.838	100.341	88.6014	7.08	0.384719	572.359	87.4281	100.927	-13.4987
Disulfide bond reductase DsbH		1		3	1	6			0	12.2046	0	0	17.9744	5.01706	29.5338	0	0.0875807	64.7299	4.06822	17.5084	-13.4402
Thiazole tautomerase		1		3	1	6			0	12.2046	0	0	17.9744	5.01706	29.5338	0	0.0875807	64.7299	4.06822	17.5084	-13.4402
tRNA-Ala(cgc)	1			5	3	5		6	29.4638	0	0	0	29.9573	15.0512	24.6115	10.62	0.140433	99.0838	9.82125	23.2067	-13.3854
2-O-alpha-mannosyl-D-glycerate-specific phosphotransferase enzyme HrsA					8		2		0	0	0	14.5882	0	40.1365	0	0	0.18695	54.7247	0	13.3788	-13.3788
2-C-methyl-D-erythritol 4-phosphate cytidylyltransferase 1					8				0	0	0	0	0	40.1365	0	0	0.18695	40.1365	0	13.3788	-13.3788
Beta-mannanase/endoglucanase A					8				0	0	0	0	0	40.1365	0	0	0.18695	40.1365	0	13.3788	-13.3788
Putative 1%2C2-phenylacetyl-CoA epoxidase%2C subunit D					8				0	0	0	0	0	40.1365	0	0	0.18695	40.1365	0	13.3788	-13.3788
Putative anti-sigma factor antagonist					8				0	0	0	0	0	40.1365	0	0	0.18695	40.1365	0	13.3788	-13.3788
Succinyl-CoA:coenzyme A transferase					8				0	0	0	0	0	40.1365	0	0	0.18695	40.1365	0	13.3788	-13.3788
putative diguanylate cyclase YcdT					8				0	0	0	0	0	40.1365	0	0	0.18695	40.1365	0	13.3788	-13.3788
putative quorum-quenching lactonase YtnP					8				0	0	0	0	0	40.1365	0	0	0.18695	40.1365	0	13.3788	-13.3788
Propanediol utilization protein PduA	4		2	21	7	6		2	117.855	0	32.4918	0	125.821	35.1194	29.5338	3.54	0.395041	340.821	50.1156	63.4913	-13.3757
Pyruvate synthase subunit PorC		5	10	9	31	11		1	0	61.0232	162.459	0	53.9232	155.529	54.1453	1.77	0.414803	487.08	74.4941	87.8658	-13.3717
Peptide chain release factor RF3	6	2	4	19	5	34	1	7	176.783	24.4093	64.9836	7.29411	113.838	25.0853	167.358	12.39	0.41943	579.751	88.7251	102.094	-13.3687
Elongation factor Tu-B					7	1		1	0	0	0	0	0	35.1194	4.9223	1.77	0.145458	40.0417	0	13.3472	-13.3472
Ferredoxin-3					7	1			0	0	0	0	0	35.1194	4.9223	0	0.145458	40.0417	0	13.3472	-13.3472
Acetolactate synthase small subunit		6	20	20	35	29		4	0	73.2279	324.918	0	119.829	175.597	142.747	7.08	0.450012	836.319	132.715	146.058	-13.3424
Aminopeptidase	3	1		11	9	6		1	88.3913	12.2046	0	0	65.9061	45.1535	29.5338	1.77	0.337837	241.189	33.532	46.8645	-13.3325
Putative tyrosine-protein kinase YveL					6	2			0	0	0	0	0	30.1023	9.8446	0	0.103674	39.947	0	13.3157	-13.3157
Serine/threonine-protein kinase PknJ					6	2			0	0	0	0	0	30.1023	9.8446	0	0.103674	39.947	0	13.3157	-13.3157
Siderophore exporter MmpL4				5	1	1			0	0	0	0	29.9573	5.01706	4.9223	0	0.0927903	39.8967	0	13.2989	-13.2989
V-type ATP synthase beta chain		3	2	5	3	13		14	0	36.6139	32.4918	0	29.9573	15.0512	63.9899	24.78	0.256465	178.104	23.0352	36.3328	-13.2976
Lipopolysaccharide biosynthesis protein WzxC		1	1	4		9		2	0	12.2046	16.2459	0	23.9659	0	44.3007	3.54	0.1938	96.7171	9.48352	22.7555	-13.272
PTS system sorbose-specific EIIC component				5		2		1	0	0	0	0	29.9573	0	9.8446	1.77	0.103391	39.8019	0	13.2673	-13.2673
All-trans-phytoene synthase		3	2	4	12	5		1	0	36.6139	32.4918	0	23.9659	60.2047	24.6115	1.77	0.235816	177.888	23.0352	36.2607	-13.2254
putative helicase HelY		1		2	5	3	2	3	0	12.2046	0	14.5882	11.9829	25.0853	14.7669	5.31	0.0405862	78.628	4.06822	17.2784	-13.2102
50S ribosomal protein L28	8	20	12	36	68	32	6	12	235.71	244.093	194.951	43.7646	215.693	341.16	157.514	21.24	0.413003	1432.88	224.918	238.122	-13.2042
L-ribulose-5-phosphate 4-epimerase AraD			1	6	1	3			0	0	16.2459	0	35.9488	5.01706	14.7669	0	0.141386	71.9787	5.4153	18.5776	-13.1623
Taurine--pyruvate aminotransferase		4	2	6	12	5			0	48.8186	32.4918	0	35.9488	60.2047	24.6115	0	0.250258	202.075	27.1035	40.255	-13.1515
Putative phosphonates utilization ATP-binding protein PhnK		1		2	3	5			0	12.2046	0	0	11.9829	15.0512	24.6115	0	0.0387958	63.8503	4.06822	17.2152	-13.147
Putative hydro-lyase			1	6		4			0	0	16.2459	0	35.9488	0	19.6892	0	0.162629	71.8839	5.4153	18.546	-13.1307
Leader peptidase PppA		2	1	5	8	2		1	0	24.4093	16.2459	0	29.9573	40.1365	9.8446	1.77	0.15794	120.594	13.5517	26.6461	-13.0944
Autoinducer 2-binding protein LsrB			2	7	3	3		1	0	0	32.4918	0	41.9403	15.0512	14.7669	1.77	0.202732	104.25	10.8306	23.9195	-13.0889
Xylose import ATP-binding protein XylG	3	3	7	24	13	14	1	5	88.3913	36.6139	113.721	7.29411	143.795	65.2218	68.9122	8.85	0.360942	523.95	79.5755	92.6431	-13.0676
4-hydroxy-2-oxovalerate aldolase		1	2	9	4	2			0	12.2046	32.4918	0	53.9232	20.0682	9.8446	0	0.234752	128.532	14.8988	27.9453	-13.0465
Penicillin-binding protein 4*	1		1	5	7	4		2	29.4638	0	16.2459	0	29.9573	35.1194	19.6892	3.54	0.124351	130.476	15.2366	28.2553	-13.0188
putative iron export ATP-binding protein FetA		1		1	9				0	12.2046	0	0	5.99147	45.1535	0	0	0.214009	63.3496	4.06822	17.0483	-12.9801
Lipoteichoic acid synthase		1		1	8	1			0	12.2046	0	0	5.99147	40.1365	4.9223	0	0.175208	63.2549	4.06822	17.0167	-12.9485
putative GTP-binding protein YjiA		3		6	1	7			0	36.6139	0	0	35.9488	5.01706	34.4561	0	0.229763	112.036	12.2046	25.1407	-12.936
Solvent efflux pump outer membrane protein SrpC	2	2	2	11	1	17		2	58.9275	24.4093	32.4918	0	65.9061	5.01706	83.6791	3.54	0.322593	270.431	38.6095	51.5341	-12.9246
HTH-type transcriptional repressor NicR				4		3			0	0	0	0	23.9659	0	14.7669	0	0.0690251	38.7328	0	12.9109	-12.9109
HTH-type transcriptional repressor AllR		1		6	2	1		1	0	12.2046	0	0	35.9488	10.0341	4.9223	1.77	0.141907	63.1099	4.06822	16.9684	-12.9002
Sirohydrochlorin cobaltochelatase CbiKP			2	2	1	11		1	0	0	32.4918	0	11.9829	5.01706	54.1453	1.77	0.265226	103.637	10.8306	23.7151	-12.8845
Putative 5'(3')-deoxyribonucleotidase		2		3	7	2			0	24.4093	0	0	17.9744	35.1194	9.8446	0	0.154521	87.3477	8.13643	20.9795	-12.843
L(+)-tartrate dehydratase subunit beta			1	5	2	3			0	0	16.2459	0	29.9573	10.0341	14.7669	0	0.0938603	71.0043	5.4153	18.2528	-12.8375
Putative lipid kinase				3	4			2	0	0	0	0	17.9744	20.0682	0	3.54	0.05866	38.0426	0	12.6809	-12.6809
dTDP-3-amino-3%2C6-dideoxy-alpha-D-galactopyranose transaminase		4	3	1	17	9		1	0	48.8186	48.7377	0	5.99147	85.29	44.3007	1.77	0.337556	233.138	32.5188	45.1941	-12.6753
putative D%2CD-dipeptide transport ATP-binding protein DdpD				3	3	1	2		0	0	0	14.5882	17.9744	15.0512	4.9223	0	0.0164717	52.5361	0	12.6493	-12.6493
putative xanthine dehydrogenase subunit A	1	2	2	10	4	9			29.4638	24.4093	32.4918	0	59.9147	20.0682	44.3007	0	0.172745	210.648	28.7883	41.4279	-12.6396
ABC transporter permease protein YxdM				3	2	2		1	0	0	0	0	17.9744	10.0341	9.8446	1.77	0.00461977	37.8531	0	12.6177	-12.6177
HTH-type transcriptional regulator Hpr				3	2	2			0	0	0	0	17.9744	10.0341	9.8446	0	0.00461977	37.8531	0	12.6177	-12.6177
NADH-quinone oxidoreductase subunit B				3	1	3	1		0	0	0	7.29411	17.9744	5.01706	14.7669	0	0.0159818	45.0525	0	12.5861	-12.5861
(S)-1-Phenylethanol dehydrogenase				3	1	3			0	0	0	0	17.9744	5.01706	14.7669	0	0.0159818	37.7584	0	12.5861	-12.5861
Octopine transport system permease protein OccM				3	1	3			0	0	0	0	17.9744	5.01706	14.7669	0	0.0159818	37.7584	0	12.5861	-12.5861
O-succinylhomoserine sulfhydrylase			1	4	5	1		1	0	0	16.2459	0	23.9659	25.0853	4.9223	1.77	0.106392	70.2194	5.4153	17.9912	-12.5759
GDP-mannose-dependent alpha-(1-6)-phosphatidylinositol dimannoside mannosyltransferase		1			7	3			0	12.2046	0	0	0	35.1194	14.7669	0	0.157908	62.091	4.06822	16.6288	-12.5606
DNA polymerase IV 1		2	5	3	24	1	1		0	24.4093	81.2295	7.29411	17.9744	120.409	4.9223	0	0.394142	256.239	35.2129	47.7687	-12.5558
Polyphosphate:AMP/ADP phosphotransferase				3		4			0	0	0	0	17.9744	0	19.6892	0	0.0584702	37.6636	0	12.5545	-12.5545
Diapolycopene oxygenase		1		5	2	2			0	12.2046	0	0	29.9573	10.0341	9.8446	0	0.0918768	62.0407	4.06822	16.612	-12.5438
Beta-galactosidase BgaA			1	4	3	3			0	0	16.2459	0	23.9659	15.0512	14.7669	0	0.0568776	70.0298	5.4153	17.928	-12.5127
Gellan lyase		2		2	7	3			0	24.4093	0	0	11.9829	35.1194	14.7669	0	0.158436	86.2785	8.13643	20.6231	-12.4867
Serine/threonine-protein kinase B		1	1	6	4	2		1	0	12.2046	16.2459	0	35.9488	20.0682	9.8446	1.77	0.119685	94.3122	9.48352	21.9539	-12.4704
Large-conductance mechanosensitive channel				2	5				0	0	0	0	11.9829	25.0853	0	0	0.0816285	37.0682	0	12.3561	-12.3561
Lysostaphin				2	5				0	0	0	0	11.9829	25.0853	0	0	0.0816285	37.0682	0	12.3561	-12.3561
Transposon Tn3 resolvase		7	4	8	18	10		2	0	85.4325	64.9836	0	47.9317	90.307	49.223	3.54	0.347415	337.878	50.1387	62.4873	-12.3486
Putative 2%2C3-dihydroxypropane-1-sulfonate exporter				2	4	1		2	0	0	0	0	11.9829	20.0682	4.9223	3.54	0.0239957	36.9735	0	12.3245	-12.3245
Acid shock protein				2	3	2			0	0	0	0	11.9829	15.0512	9.8446	0	0.000620885	36.8787	0	12.2929	-12.2929
Endo-1%2C4-beta-xylanase B		1	3	3	11	5		1	0	12.2046	48.7377	0	17.9744	55.1876	24.6115	1.77	0.272575	158.716	20.3141	32.5912	-12.2771
Adenylylsulfate reductase subunit beta				2	2	3			0	0	0	0	11.9829	10.0341	14.7669	0	0.000435083	36.784	0	12.2613	-12.2613
Barstar				2	2	3			0	0	0	0	11.9829	10.0341	14.7669	0	0.000435083	36.784	0	12.2613	-12.2613
NADH-quinone oxidoreductase subunit D				2	1	4			0	0	0	0	11.9829	5.01706	19.6892	0	0.0223662	36.6892	0	12.2297	-12.2297
ABC-type transporter ATP-binding protein EcsA		5	1	9	10	2			0	61.0232	16.2459	0	53.9232	50.1706	9.8446	0	0.312103	191.208	25.7564	37.9795	-12.2231
Aldehyde oxidoreductase		1		4	3	2		1	0	12.2046	0	0	23.9659	15.0512	9.8446	1.77	0.0512711	61.0663	4.06822	16.2872	-12.219
Beta-1%2C6-galactofuranosyltransferase WbbI				2		5			0	0	0	0	11.9829	0	24.6115	0	0.0805849	36.5944	0	12.1981	-12.1981
NAD(P)H-quinone oxidoreductase subunit 2%2C chloroplastic				2		5			0	0	0	0	11.9829	0	24.6115	0	0.0805849	36.5944	0	12.1981	-12.1981
Ornithine carbamoyltransferase%2C anabolic				2		5			0	0	0	0	11.9829	0	24.6115	0	0.0805849	36.5944	0	12.1981	-12.1981
Guanine/hypoxanthine permease PbuO		2		6	4	1		2	0	24.4093	0	0	35.9488	20.0682	4.9223	3.54	0.185614	85.3486	8.13643	20.3131	-12.1767
Aminopeptidase YpdF	2	8	11	19	21	31	1	2	58.9275	97.6372	178.705	7.29411	113.838	105.358	152.591	3.54	0.382871	714.351	111.757	123.929	-12.1726
Aminopeptidase S		1		4	1	4			0	12.2046	0	0	23.9659	5.01706	19.6892	0	0.0795072	60.8768	4.06822	16.224	-12.1558
Tyrocidine synthase 3			1	3	1	6		1	0	0	16.2459	0	17.9744	5.01706	29.5338	1.77	0.123217	68.7712	5.4153	17.5084	-12.0931
Phytoene desaturase (lycopene-forming)				1	6			1	0	0	0	0	5.99147	30.1023	0	1.77	0.130518	36.0938	0	12.0313	-12.0313
Alpha-galacturonidase				1	6				0	0	0	0	5.99147	30.1023	0	0	0.130518	36.0938	0	12.0313	-12.0313
Type 2 DNA topoisomerase 6 subunit B				1	6				0	0	0	0	5.99147	30.1023	0	0	0.130518	36.0938	0	12.0313	-12.0313
L-fuculose phosphate aldolase	2	1	2	5	15	7		4	58.9275	12.2046	32.4918	0	29.9573	75.2559	34.4561	7.08	0.288019	243.293	34.5413	46.5564	-12.0151
Phosphonopyruvate hydrolase				1	5	1			0	0	0	0	5.99147	25.0853	4.9223	0	0.0704507	35.9991	0	11.9997	-11.9997
6-deoxy-6-sulfogluconolactonase				6					0	0	0	0	35.9488	0	0	0	0.18695	35.9488	0	11.9829	-11.9829
NADP-specific glutamate dehydrogenase	1	7	5	12	28	4		3	29.4638	85.4325	81.2295	0	71.8976	140.478	19.6892	5.31	0.387944	428.19	65.3753	77.3548	-11.9796
Ycf48-like protein		1	1		4	9			0	12.2046	16.2459	0	0	20.0682	44.3007	0	0.215847	92.8195	9.48352	21.4563	-11.9728
Putative ribosomal protein L7Ae-like protein				1	4	2		1	0	0	0	0	5.99147	20.0682	9.8446	1.77	0.023209	35.9043	0	11.9681	-11.9681
Putative pyridoxal phosphate-dependent aminotransferase EpsN		9	5	8	19	17		1	0	109.842	81.2295	0	47.9317	95.3241	83.6791	1.77	0.377786	418.006	63.6904	75.645	-11.9546
Outer membrane protein SusE		5		2	12	5			0	61.0232	0	0	11.9829	60.2047	24.6115	0	0.328771	157.822	20.3411	32.2664	-11.9253
3-amino-4-hydroxybenzoic acid synthase				1	1	5			0	0	0	0	5.99147	5.01706	24.6115	0	0.068011	35.62	0	11.8733	-11.8733
Protein ViaA	2	1		12	4	3		1	58.9275	12.2046	0	0	71.8976	20.0682	14.7669	1.77	0.333447	177.865	23.7107	35.5776	-11.8669
Galactofuranosyltransferase GlfT1		1		3	1	5		1	0	12.2046	0	0	17.9744	5.01706	24.6115	1.77	0.0846745	59.8076	4.06822	15.8677	-11.7994
tRNA/tmRNA (uracil-C(5))-methyltransferase	4	6	2	16	7	26	1	4	117.855	73.2279	32.4918	7.29411	95.8635	35.1194	127.98	7.08	0.382083	489.832	74.5249	86.3209	-11.796
Outer membrane porin F	8	6	4	20	42	16	5		235.71	73.2279	64.9836	36.4705	119.829	210.716	78.7568	0	0.435268	819.695	124.641	136.434	-11.7937
Selenide%2C water dikinase	2	8	6	15	28	12		4	58.9275	97.6372	97.4754	0	89.872	140.478	59.0676	7.08	0.342415	543.457	84.68	96.4724	-11.7924
Queuosine precursor transporter QueT	1	7	4	11	16	14		1	29.4638	85.4325	64.9836	0	65.9061	80.2729	68.9122	1.77	0.263098	394.971	59.96	71.6971	-11.7371
Proton glutamate symport protein					7		3		0	0	0	21.8823	0	35.1194	0	0	0.18695	57.0017	0	11.7065	-11.7065
Peptidoglycan synthase FtsI					7		2		0	0	0	14.5882	0	35.1194	0	0	0.18695	49.7076	0	11.7065	-11.7065
Inner membrane transport permease YbhS					7		1		0	0	0	7.29411	0	35.1194	0	0	0.18695	42.4135	0	11.7065	-11.7065
Inner membrane transport permease YbhR					7				0	0	0	0	0	35.1194	0	0	0.18695	35.1194	0	11.7065	-11.7065
Putative CDP-glycerol:glycerophosphate glycerophosphotransferase					7				0	0	0	0	0	35.1194	0	0	0.18695	35.1194	0	11.7065	-11.7065
R-phenyllactate dehydratase beta subunit					7				0	0	0	0	0	35.1194	0	0	0.18695	35.1194	0	11.7065	-11.7065
putative glycerophosphoryl diester phosphodiesterase 1					7				0	0	0	0	0	35.1194	0	0	0.18695	35.1194	0	11.7065	-11.7065
putative poly(glycerol-phosphate) alpha-glucosyltransferase					7				0	0	0	0	0	35.1194	0	0	0.18695	35.1194	0	11.7065	-11.7065
DNA ligase B					6	1	1	1	0	0	0	7.29411	0	30.1023	4.9223	1.77	0.13934	42.3188	0	11.6749	-11.6749
HTH-type transcriptional activator TipA				5	1			2	0	0	0	0	29.9573	5.01706	0	3.54	0.138329	34.9744	0	11.6581	-11.6581
Bacillopeptidase F				5	1			1	0	0	0	0	29.9573	5.01706	0	1.77	0.138329	34.9744	0	11.6581	-11.6581
4-hydroxy-2-oxo-heptane-1%2C7-dioate aldolase				5		1			0	0	0	0	29.9573	0	4.9223	0	0.139137	34.8796	0	11.6265	-11.6265
Squalene--hopene cyclase				5		1			0	0	0	0	29.9573	0	4.9223	0	0.139137	34.8796	0	11.6265	-11.6265
NADH dehydrogenase	7	14	7	38	26	34	4	7	206.246	170.865	113.721	29.1764	227.676	130.444	167.358	12.39	0.391238	1045.49	163.611	175.159	-11.5483
HTH-type transcriptional regulator DdrOC			1	6	1	2			0	0	16.2459	0	35.9488	5.01706	9.8446	0	0.17757	67.0564	5.4153	16.9368	-11.5215
dTDP-4-oxo-6-deoxy-D-allose reductase		1	1	3	6	3		1	0	12.2046	16.2459	0	17.9744	30.1023	14.7669	1.77	0.0824931	91.2942	9.48352	20.9479	-11.4644
Ribosome-associated protein L7Ae-like protein		3		1	10	3			0	36.6139	0	0	5.99147	50.1706	14.7669	0	0.281912	107.543	12.2046	23.643	-11.4383
D-methionine transport system permease protein MetI	2	4	2	15	10	7	2	3	58.9275	48.8186	32.4918	14.5882	89.872	50.1706	34.4561	5.31	0.28218	329.325	46.746	58.1662	-11.4203
Ferredoxin 7Fe		1		2		7			0	12.2046	0	0	11.9829	0	34.4561	0	0.176871	58.6437	4.06822	15.4797	-11.4115
IPT/TIG domain-containing protein		3		1	8	5		1	0	36.6139	0	0	5.99147	40.1365	24.6115	1.77	0.254379	107.353	12.2046	23.5798	-11.3752
RNA polymerase sigma-35 factor	1	4	5	19	10	6	1	2	29.4638	48.8186	81.2295	7.29411	113.838	50.1706	29.5338	3.54	0.360192	360.348	53.1706	64.5141	-11.3435
putative formate transporter 1	9	13	5	32	29	41	3	10	265.174	158.66	81.2295	21.8823	191.727	145.495	201.814	17.7	0.424899	1065.98	168.355	179.679	-11.3241
[truncated: 4,893 more rows]

## Sheet: Fish5678 prokk vs 391 ruminant 
Prokka annotation	F5 raw	F6 raw	F7 raw	F8 raw	F5 per 1M	F6 per 1M	F7 per 1M	F8 per 1M	red deer raw	rein-deer raw	sheep raw	cattle raw	co-assembly raw	red deer per 1M	reindeer per 1M	sheep per 1M	cattle per 1M	co-asembly per 1M	diff p-value NORM F567, Rum 1 sided, homo-scedastic	avg 5,6,7 per 1M	avg rum per 1M	diff avg rum-fish per 1M	Fish/Rum Fold diff
Arylsulfatase	753	944	1430	158	3731	3344	5379	225	15	19	9	4	23	57	133	77	82	124	5.62239e-05	4151.33	94.6	-4056.73	43.883
Choline-sulfatase	156	113	253	36	773	400	952	51	3	5			1	11	35	0	0	5	0.000543904	708.333	10.2	-698.133	69.4444
Tyrosine recombinase XerD	298	295	361	85	1477	1045	1358	121	174	95	94	32	139	663	663	803	658	750	0.000603592	1293.33	707.4	-585.933	1.82829
Murein DD-endopeptidase MepM	237	300	392	59	1174	1063	1474	84	224	120	64	22	115	853	838	547	452	621	0.00303976	1237	662.2	-574.8	1.86802
ATP-dependent RNA helicase RhlE	102	113	147	25	505	400	553	36	9	11	5	3	9	34	77	43	62	49	7.81002e-06	486	53	-433	9.16981
Putative fimbrium subunit Fim1C	41	44	274	20	203	156	1031	28	5	8	4	1	5	19	56	34	21	27	0.0413962	463.333	31.4	-431.933	14.7558
Beta-galactosidase	182	226	406	61	902	800	1527	87	156	107	76	34	124	594	747	649	699	669	0.0270411	1076.33	671.6	-404.733	1.60264
Tyrosine recombinase XerC	230	238	261	65	1140	843	982	93	145	96	86	26	99	552	670	734	535	534	0.0018264	988.333	605	-383.333	1.63361
HTH-type transcriptional regulator DmlR	177	34	5	17	877	120	19	24	2				4	8	0	0	0	22	0.0718008	338.667	6	-332.667	56.4444
putative zinc protease	137	186	295	42	679	659	1110	60	157	75	54	18	90	598	523	461	370	486	0.016157	816	487.6	-328.4	1.6735
Multifunctional alkaline phosphatase superfamily protein	57	58	133	9	282	205	500	13	4	2	2		1	15	14	17	0	5	0.00131495	329	10.2	-318.8	32.2549
Beta-galactosidase BoGH2A	86	218	324	14	426	772	1219	20	118	64	77	24	80	450	447	658	493	432	0.0650598	805.667	496	-309.667	1.62433
3'(2')%2C5'-bisphosphate nucleotidase CysQ	68	47	128	20	337	166	481	28	9	6	1		7	34	42	9	0	38	0.00205326	328	24.6	-303.4	13.3333
Endo-1%2C4-beta-xylanase A	122	78	177	10	604	276	666	14	89	28	8	5	68	339	195	68	103	367	0.0227496	515.333	214.4	-300.933	2.40361
Carbonic anhydrase 2	62	43	91	26	307	152	342	37	3	5	1		7	11	35	9	0	38	0.0006475	267	18.6	-248.4	14.3548
Glutamine-dependent NAD(+) synthetase	97	125	199	32	481	443	749	46	67	44	34	18	63	255	307	290	370	340	0.00858604	557.667	312.4	-245.267	1.7851
Glutamate/gamma-aminobutyrate antiporter	41	56	81	12	203	198	305	17											0	235.333	0	-235.333	0
HTH-type transcriptional regulator CysL	73	57	64	15	362	202	241	21	1	6	5	2	7	4	42	43	41	38	0.000336608	268.333	33.6	-234.733	7.98611
Outer membrane protein OprM	80	62	160	30	396	220	602	43	54	21	25	7	27	206	147	214	144	146	0.0152697	406	171.4	-234.6	2.36873
Ktr system potassium uptake protein B	67	73	90	13	332	259	339	19	17	14	10	2	17	65	98	85	41	92	2.82046e-05	310	76.2	-233.8	4.06824
Multidrug resistance protein NorM	81	112	72	16	401	397	271	23	20	11	16	12	15	76	77	137	247	81	0.0024803	356.333	123.6	-232.733	2.88296
Alpha-1%2C3-galactosidase B	50	69	55	9	248	244	207	13			1			0	0	9	0	0	1.93661e-07	233	1.8	-231.2	129.444
Sensor histidine kinase YpdA	179	90	205	29	887	319	771	41	82	50	40	29	103	312	349	342	596	556	0.0891675	659	431	-228	1.529
Membrane-bound lytic murein transglycosylase D	72	107	168	26	357	379	632	37	93	36	24	8	32	354	251	205	164	173	0.0144502	456	229.4	-226.6	1.98779
Beta-porphyranase B	17	32	128	5	84	113	481	7											0	226	0	-226	0
Glutamate decarboxylase	37	39	95	16	183	138	357	23											0	226	0	-226	0
Apolipoprotein N-acyltransferase	51	63	110	22	253	223	414	31	30	13	6	1	16	114	91	51	21	86	0.00180765	296.667	72.6	-224.067	4.08632
Alkyl hydroperoxide reductase C	55	33	84	19	273	117	316	27	7		1		4	27	0	9	0	22	0.00122948	235.333	11.6	-223.733	20.2874
Formate acetyltransferase	74	105	98	20	367	372	369	28	17	22	10	12	37	65	154	85	247	200	0.00149104	369.333	150.2	-219.133	2.45894
Phosphocholine transferase AnkX	32	31	158	8	159	110	594	11	18	22	8		11	69	154	68	0	59	0.0561003	287.667	70	-217.667	4.10952
N5-carboxyaminoimidazole ribonucleotide synthase	43	39	93	22	213	138	350	31	1	2	1	3	3	4	14	9	62	16	0.00208625	233.667	21	-212.667	11.127
Multidrug resistance protein MdtA	106	91	146	30	525	322	549	43	77	41	30	10	45	293	286	256	206	243	0.00513863	465.333	256.8	-208.533	1.81205
Uroporphyrinogen decarboxylase	56	53	81	10	277	188	305	14	9	7	8	3	8	34	49	68	62	43	0.00013548	256.667	51.2	-205.467	5.01302
Alcohol dehydrogenase YqhD	36	52	71	13	178	184	267	19	2	1			2	8	7	0	0	11	3.54083e-05	209.667	5.2	-204.467	40.3205
Phosphate transport system permease protein PstC	54	60	47	13	268	213	177	19	5	3	2		5	19	21	17	0	27	2.8866e-05	219.333	16.8	-202.533	13.0556
Phosphate import ATP-binding protein PstB 3	60	63	50	13	297	223	188	19	6	7	4	2	4	23	49	34	41	22	8.48485e-05	236	33.8	-202.2	6.98225
Pyridoxine 5'-phosphate synthase	57	68	105	14	282	241	395	20	43	16	11	3	17	164	112	94	62	92	0.00125553	306	104.8	-201.2	2.91985
N-acetylglucosamine repressor	60	63	87	14	297	223	327	20	28	18	8	1	16	107	126	68	21	86	0.000446102	282.333	81.6	-200.733	3.45997
Ktr system potassium uptake protein A	69	72	92	9	342	255	346	13	19	24	14	4	25	72	168	120	82	135	0.000394536	314.333	115.4	-198.933	2.72386
Polyphosphate kinase	68	79	101	17	337	280	380	24	23	17	7	12	29	88	119	60	247	157	0.00314394	332.333	134.2	-198.133	2.4764
Epoxyqueuosine reductase	54	78	92	23	268	276	346	33	22	16	10	7	13	84	112	85	144	70	0.000113225	296.667	99	-197.667	2.99663
Beta-porphyranase A	14	39	96	2	69	138	361	3											0	189.333	0	-189.333	0
1%2C4-dihydroxy-6-naphtoate synthase	34	27	88	14	168	96	331	20	3	1		1	2	11	7	0	21	11	0.00507345	198.333	10	-188.333	19.8333
tRNA (guanosine(18)-2'-O)-methyltransferase	69	65	164	34	342	230	617	48	70	27	15	14	32	267	188	128	288	173	0.0451138	396.333	208.8	-187.533	1.89815
Putative two-component membrane permease complex subunit SMU_747c	49	49	101	18	243	174	380	26	27	12	10	3	12	103	84	85	62	65	0.00317471	265.667	79.8	-185.867	3.32916
Efflux pump membrane transporter BepE	82	82	211	30	406	290	794	43	80	43	61	14	29	305	300	521	288	157	0.113982	496.667	314.2	-182.467	1.58073
N(1)-aminopropylagmatine ureohydrolase	30	41	81	14	149	145	305	20	13	4	1		3	50	28	9	0	16	0.00214576	199.667	20.6	-179.067	9.69256
Methylglyoxal synthase	68	86	92	13	337	305	346	19	28	20	12	10	40	107	140	102	206	216	0.00097282	329.333	154.2	-175.133	2.13575
Phosphate transport system permease protein PstA	49	56	43	15	243	198	162	21	4	8	3	1	4	15	56	26	21	22	5.9276e-05	201	28	-173	7.17857
UDP-2%2C3-diacylglucosamine hydrolase	65	64	132	25	322	227	497	36	58	24	22	9	22	221	168	188	185	119	0.0158501	348.667	176.2	-172.467	1.97881
Aminodeoxyfutalosine synthase	39	30	99	12	193	106	372	17	18	4	10	1	10	69	28	85	21	54	0.0136729	223.667	51.4	-172.267	4.35149
Dihydroorotate dehydrogenase (quinone)	36	25	87	12	178	89	327	17	5	4	3	2	4	19	28	26	41	22	0.00769037	198	27.2	-170.8	7.27941
Putative alkyl/aryl-sulfatase YjcS	36	45	70	13	178	159	263	19	1	3	5	3	3	4	21	43	62	16	0.000373727	200	29.2	-170.8	6.84932
DNA primase	124	260	210	31	614	921	790	44	153	90	79	25	115	583	628	675	514	621	0.0304483	775	604.2	-170.8	1.28269
Modification methylase HhaI	50	76	72	15	248	269	271	21	29	15	11	4	13	110	105	94	82	70	2.5084e-06	262.667	92.2	-170.467	2.84888
L-rhamnose-proton symporter	26	44	86	2	129	156	323	3	11	6	3	1	6	42	42	26	21	32	0.00444269	202.667	32.6	-170.067	6.21677
NADPH-flavin oxidoreductase	49	72	75	12	243	255	282	17	31	16	11	2	16	118	112	94	41	86	7.29892e-05	260	90.2	-169.8	2.88248
Inner membrane protein YbaN	38	38	66	11	188	135	248	16	9	3		1	5	34	21	0	21	27	0.000250437	190.333	20.6	-169.733	9.23948
3-octaprenyl-4-hydroxybenzoate carboxy-lyase	38	37	91	21	188	131	342	30	17	3	12	1	9	65	21	102	21	49	0.00764653	220.333	51.6	-168.733	4.27003
Futalosine hydrolase	29	26	85	11	144	92	320	16	3	2	1	2	2	11	14	9	41	11	0.00824566	185.333	17.2	-168.133	10.7752
Catalase	33	32	60	14	164	113	226	20											0	167.667	0	-167.667	0
ATP-dependent Clp protease proteolytic subunit	129	208	221	35	639	737	831	50	151	76	62	27	122	575	530	530	555	658	0.00888798	735.667	569.6	-166.067	1.29155
p-aminobenzoyl-glutamate transport protein	41	51	43	17	203	181	162	24	4	4	3		3	15	28	26	0	16	2.6289e-06	182	17	-165	10.7059
Transcriptional regulatory protein ZraR	50	76	84	17	248	269	316	24	49	20	13	1	20	187	140	111	21	108	0.00280952	277.667	113.4	-164.267	2.44856
Ribonuclease HI	59	69	95	19	292	244	357	27	39	17	14	5	33	149	119	120	103	178	0.000755312	297.667	133.8	-163.867	2.22471
Iota-carrageenase	25	60	37	3	124	213	139	4											0	158.667	0	-158.667	0
Cyclic dehypoxanthine futalosine synthase	30	23	91	18	149	81	342	26	10	3	5	1	7	38	21	43	21	38	0.0164379	190.667	32.2	-158.467	5.92133
putative glutamine ABC transporter permease protein GlnM	53	21	51	9	263	74	192	13	3			1	11	11	0	0	21	59	0.00507988	176.333	18.2	-158.133	9.68864
Arsenate reductase	39	33	52	9	193	117	196	13			1	2	1	0	0	9	41	5	0.000163499	168.667	11	-157.667	15.3333
Sulfate adenylyltransferase subunit 2	51	34	85	17	253	120	320	24	24	17	6	2	12	91	119	51	41	65	0.00760622	231	73.4	-157.6	3.14714
Phosphate-specific transport system accessory protein PhoU	64	43	57	9	317	152	214	13	8	4	5	9	12	30	28	43	185	65	0.012185	227.667	70.2	-157.467	3.24311
putative ABC transporter ATP-binding protein YbiT	109	142	132	34	540	503	497	48	78	42	39	20	84	297	293	333	411	453	0.00590668	513.333	357.4	-155.933	1.4363
Endoglucanase	78	38	77	1	386	135	290	1	57	15	6	1	33	217	105	51	21	178	0.037842	270.333	114.4	-155.933	2.36305
1%2C3-propanediol dehydrogenase	47	45	47	6	233	159	177	9	11	6	3	1	7	42	42	26	21	38	5.1815e-05	189.667	33.8	-155.867	5.61144
Outer membrane lipoprotein Blc	34	37	54	11	168	131	203	16	10	1			3	38	7	0	0	16	6.47211e-05	167.333	12.2	-155.133	13.7158
Nitrogen regulatory protein P-II	60	91	67	21	297	322	252	30	25	23	13	11	16	95	161	111	226	86	0.00320878	290.333	135.8	-154.533	2.13795
Endonuclease 4	32	32	68	12	159	113	256	17	8	8	1		3	30	56	9	0	16	0.00184268	176	22.2	-153.8	7.92793
Adenosine deaminase	43	23	82	8	213	81	308	11	13	11	3	2	9	50	77	26	41	49	0.01079	200.667	48.6	-152.067	4.12894
Na(+)/H(+) antiporter NhaA	41	49	72	15	203	174	271	21	15	15	6	4	5	57	105	51	82	27	0.000757881	216	64.4	-151.6	3.35404
Magnesium transport protein CorA	30	40	81	13	149	142	305	19	19	6	7	2	5	72	42	60	41	27	0.00485166	198.667	48.4	-150.267	4.10468
Vitamin B12-dependent ribonucleoside-diphosphate reductase	35	75	76	15	173	266	286	21	33	13	13	3	13	126	91	111	62	70	0.001255	241.667	92	-149.667	2.62681
Group II intron-encoded protein LtrA	74	39	60	18	367	138	226	26	22	11	18	6	6	84	77	154	123	32	0.0185258	243.667	94	-149.667	2.5922
N-alpha-acetyl-L-2%2C4-diaminobutyric acid deacetylase	54	26	69	14	268	92	260	20	6	8	6	6	7	23	56	51	123	38	0.0104399	206.667	58.2	-148.467	3.55097
Glutaminase 1	26	26	60	8	129	92	226	11					1	0	0	0	0	5	0.00114743	149	1	-148	149
DNA ligase	120	210	148	39	595	744	557	56	131	75	53	20	99	499	523	453	411	534	0.0143542	632	484	-148	1.30579
Succinyl-diaminopimelate desuccinylase	49	81	82	18	243	287	308	26	41	25	17	5	15	156	174	145	103	81	0.000771088	279.333	131.8	-147.533	2.11937
Beta-xylosidase	45	40	61	20	223	142	229	28	10	12	1	1	20	38	84	9	21	108	0.00207102	198	52	-146	3.80769
Sporulation initiation inhibitor protein Soj	126	155	187	29	624	549	703	41	122	69	58	21	97	465	482	495	432	524	0.00448841	625.333	479.6	-145.733	1.30386
Rubrerythrin	72	105	122	17	357	372	459	24	35	47	25	19	36	133	328	214	391	194	0.0371842	396	252	-144	1.57143
Lipoprotein-releasing system transmembrane protein LolC	27	41	76	8	134	145	286	11	22	6	6		9	84	42	51	0	49	0.00581613	188.333	45.2	-143.133	4.16667
Thiamine-phosphate synthase	56	104	137	15	277	368	515	21	59	28	31	17	34	225	195	265	350	183	0.0344131	386.667	243.6	-143.067	1.5873
Inner membrane protein YjjP	43	53	74	13	213	188	278	19	18	7	18	5	8	69	49	154	103	43	0.00269947	226.333	83.6	-142.733	2.70734
Unsaturated chondroitin disaccharide hydrolase	35	22	64	10	173	78	241	14	5	7	2		4	19	49	17	0	22	0.00376245	164	21.4	-142.6	7.66355
Ribosomal RNA small subunit methyltransferase I	125	161	224	36	619	570	843	51	162	87	53	20	109	617	607	453	411	588	0.0705884	677.333	535.2	-142.133	1.26557
Iron hydrogenase 1	65	83	86	9	322	294	323	13	39	20	12	8	56	149	140	102	164	302	0.0109926	313	171.4	-141.6	1.82614
NADP-dependent malic enzyme	36	51	75	14	178	181	282	20	16	5	11	6	9	61	35	94	123	49	0.00253149	213.667	72.4	-141.267	2.9512
Ribosomal large subunit pseudouridine synthase A	46	77	100	15	228	273	376	21	39	15	28	7	23	149	105	239	144	124	0.00980341	292.333	152.2	-140.133	1.92072
Erythronate-4-phosphate dehydrogenase	39	54	73	17	193	191	275	24	34	13	11	2	8	130	91	94	41	43	0.00180367	219.667	79.8	-139.867	2.75272
Redox-sensing transcriptional repressor Rex	56	90	105	14	277	319	395	20	43	24	17	10	50	164	168	145	206	270	0.00571571	330.333	190.6	-139.733	1.73312
Sensor histidine kinase BtsS	103	42	141	12	510	149	530	17	25	53	24	15	57	95	370	205	308	308	0.128541	396.333	257.2	-139.133	1.54095
Thiamine-monophosphate kinase	70	69	135	22	347	244	508	31	69	34	25	12	34	263	237	214	247	183	0.029435	366.333	228.8	-137.533	1.60111
tRNA-specific 2-thiouridylase MnmA	104	170	213	35	515	602	801	50	132	71	53	25	101	503	496	453	514	545	0.0395643	639.333	502.2	-137.133	1.27307
Inner membrane protein YohK	27	57	53	6	134	202	199	9	7	1	3	5	8	27	7	26	103	43	0.00119571	178.333	41.2	-137.133	4.32848
Urease subunit alpha	20	14	74	3	99	50	278	4		1			4	0	7	0	0	22	0.0182401	142.333	5.8	-136.533	24.5402
tRNA 5-methylaminomethyl-2-thiouridine biosynthesis bifunctional protein MnmC	35	48	41	6	173	170	154	9	8	4	1	2	8	30	28	9	41	43	3.00022e-06	165.667	30.2	-135.467	5.48565
Multifunctional alkaline phosphatase superfamily protein PehA	25	16	63	10	124	57	237	14	3		1			11	0	9	0	0	0.00629568	139.333	4	-135.333	34.8333
Chorismate dehydratase	30	23	75	9	149	81	282	13	12	3	6	1	7	46	21	51	21	38	0.010815	170.667	35.4	-135.267	4.82109
23S rRNA pseudouridine(2604) synthase	33	59	66	13	164	209	248	19	8	14	2	4	25	30	98	17	82	135	0.00377146	207	72.4	-134.6	2.85912
3-oxoacyl-[acyl-carrier-protein] synthase 3	71	118	137	13	352	418	515	19	91	36	41	13	47	347	251	350	267	254	0.012985	428.333	293.8	-134.533	1.45791
Energy-dependent translational throttle protein EttA	114	124	178	29	565	439	670	41	119	59	53	23	61	453	412	453	473	329	0.0328522	558	424	-134	1.31604
Multidrug export protein MepA	348	381	338	51	1724	1350	1271	73	320	197	124	73	263	1219	1375	1059	1501	1419	0.197992	1448.33	1314.6	-133.733	1.10173
Protein TolQ	73	43	113	19	362	152	425	27	46	29	21	9	29	175	202	179	185	157	0.0357776	313	179.6	-133.4	1.74276
Short-chain-enoyl-CoA hydratase	30	74	69	10	149	262	260	14	31	15	4	3	26	118	105	34	62	140	0.00625005	223.667	91.8	-131.867	2.43646
Hercynine oxygenase	41	22	75	31	203	78	282	44	33	9	7		6	126	63	60	0	32	0.0216644	187.667	56.2	-131.467	3.33926
Phosphate regulon transcriptional regulatory protein PhoB	48	49	56	12	238	174	211	17	15	6	17	3	14	57	42	145	62	76	0.0015553	207.667	76.4	-131.267	2.71815
Ribonuclease R	88	117	143	31	436	414	538	44	91	50	38	15	61	347	349	325	308	329	0.00224067	462.667	331.6	-131.067	1.39526
Toluene efflux pump periplasmic linker protein TtgD	33	15	76	8	164	53	286	11	10	5	9	1	4	38	35	77	21	22	0.0222877	167.667	38.6	-129.067	4.3437
Lipoyl synthase	27	51	29	7	134	181	109	10	1	5			5	4	35	0	0	27	0.000212045	141.333	13.2	-128.133	10.7071
Internalin-A	54	90	121	61	268	319	455	87	78	47	29	3	30	297	328	248	62	162	0.0721757	347.333	219.4	-127.933	1.58311
Putrescine aminotransferase	22	25	68	7	109	89	256	10	3	3	2	3	2	11	21	17	62	11	0.0101295	151.333	24.4	-126.933	6.20219
DEAD-box ATP-dependent RNA helicase CshA	29	76	67	19	144	269	252	27	37	9	9	5	17	141	63	77	103	92	0.00470121	221.667	95.2	-126.467	2.32843
Evolved beta-galactosidase subunit alpha	36	38	97	14	178	135	365	20	22	22	10	3	21	84	154	85	62	113	0.0318818	226	99.6	-126.4	2.26908
Uridine phosphorylase	67	70	89	19	332	248	335	27	71	22	14	7	38	271	154	120	144	205	0.0113569	305	178.8	-126.2	1.70582
3%2C6-anhydro-alpha-L-galactose dehydrogenase	14	40	44	3	69	142	166	4					1	0	0	0	0	5	0.000554945	125.667	1	-124.667	125.667
Chondroitinase-AC	20	19	56	5	99	67	211	7		1				0	7	0	0	0	0.00403308	125.667	1.4	-124.267	89.7619
HTH-type transcriptional regulator LutR	47	33	36	5	233	117	135	7	4	4	3	4	7	15	28	26	82	38	0.00334857	161.667	37.8	-123.867	4.2769
Octanoyltransferase	25	47	26	9	124	166	98	13	1	2			2	4	14	0	0	11	8.54535e-05	129.333	5.8	-123.533	22.2989
Thymidylate synthase	48	74	84	23	238	262	316	33	53	26	12	6	25	202	181	102	123	135	0.00311733	272	148.6	-123.4	1.83042
FMN reductase (NADPH)	31	31	74	5	154	110	278	7	16	13	6	2	9	61	91	51	41	49	0.00967406	180.667	58.6	-122.067	3.08305
putative S-adenosylmethionine-dependent methyltransferase/MSMEI_2290	23	17	61	9	114	60	229	13	2	5	1		2	8	35	9	0	11	0.00852471	134.333	12.6	-121.733	10.6614
Demethylmenaquinone methyltransferase	37	52	125	12	183	184	470	17	55	16	21	8	23	210	112	179	164	124	0.0756833	279	157.8	-121.2	1.76806
Alkaline phosphatase 4	32	61	53	11	159	216	199	16	33	15	9		8	126	105	77	0	43	0.00476637	191.333	70.2	-121.133	2.72555
Sensor histidine kinase TodS	58	121	113	9	287	429	425	13	32	36	35	18	47	122	251	299	370	254	0.0532783	380.333	259.2	-121.133	1.46734
NADH dehydrogenase	45	40	41	11	223	142	154	16	11	8	9	1	12	42	56	77	21	65	0.000855839	173	52.2	-120.8	3.31418
Type II secretion system protein D	56	37	25	14	277	131	94	20	14	6	10		10	53	42	85	0	54	0.0178839	167.333	46.8	-120.533	3.5755
Enoyl-[acyl-carrier-protein] reductase [NADH] FabI	24	36	70	11	119	128	263	16	12	8	6	2	10	46	56	51	41	54	0.00626055	170	49.6	-120.4	3.42742
Lambda-carrageenase	14	56	25	0	69	198	94	0											0	120.333	0	-120.333	0
Thymidylate kinase	89	99	130	25	441	351	489	36	77	56	31	13	59	293	391	265	267	318	0.0153338	427	306.8	-120.2	1.39179
Catabolite control protein A	64	59	78	7	317	209	293	10	25	20	16	5	54	95	140	137	103	291	0.0325166	273	153.2	-119.8	1.78198
D-amino acid dehydrogenase	30	34	48	11	149	120	181	16	5	11	4		4	19	77	34	0	22	0.000704296	150	30.4	-119.6	4.93421
L-fucose-proton symporter	74	84	154	20	367	298	579	28	84	39	44	15	37	320	272	376	308	200	0.0762012	414.667	295.2	-119.467	1.4047
Stage II sporulation protein Q	29	44	56	11	144	156	211	16	11	11	4	2	12	42	77	34	41	65	0.000350569	170.333	51.8	-118.533	3.28829
Phosphomethylpyrimidine synthase	30	41	74	15	149	145	278	21	11	7	8	7	13	42	49	68	144	70	0.0137062	190.667	74.6	-116.067	2.55585
Arylsulfate sulfotransferase AssT	34	10	41	4	168	35	154	6	1	2				4	14	0	0	0	0.00492913	119	3.6	-115.4	33.0556
Chaperone SurA	62	81	131	27	307	287	493	38	100	36	30	8	35	381	251	256	164	189	0.0754629	362.333	248.2	-114.133	1.45984
2-iminoacetate synthase	50	93	128	16	248	329	481	23	73	34	21	13	43	278	237	179	267	232	0.0415585	352.667	238.6	-114.067	1.47807
UDP-N-acetylglucosamine 1-carboxyvinyltransferase	43	73	94	17	213	259	354	24	59	24	14	8	26	225	168	120	164	140	0.0134024	275.333	163.4	-111.933	1.68503
Outer membrane protein assembly factor BamD	62	116	127	25	307	411	478	36	108	41	34	11	41	411	286	290	226	221	0.0518513	398.667	286.8	-111.867	1.39005
ATP-dependent DNA helicase UvrD2	15	37	49	8	74	131	184	11	8	3	1	1	2	30	21	9	21	11	0.00168813	129.667	18.4	-111.267	7.0471
putative oxidoreductase UxuB	30	12	58	4	149	43	218	6	9	5	2	1	4	34	35	17	21	22	0.0126801	136.667	25.8	-110.867	5.29716
putative hydrolase YxeP	52	28	77	11	258	99	290	16	51	11	15	2	16	194	77	128	41	86	0.0467705	215.667	105.2	-110.467	2.05006
putative formate transporter 1	41	42	46	13	203	149	173	19	15	7	4	5	15	57	49	34	103	81	0.000727007	175	64.8	-110.2	2.70062
CRISPR pre-crRNA endoribonuclease Cas5d	30	20	43	7	149	71	162	10	5	2	2	1	3	19	14	17	21	16	0.000931145	127.333	17.4	-109.933	7.31801
Electron transport complex subunit RsxD	87	113	147	25	431	400	553	36	104	62	32	14	68	396	433	273	288	367	0.0427232	461.333	351.4	-109.933	1.31284
putative CtpA-like serine protease	69	128	179	27	342	453	673	38	134	68	35	14	60	511	475	299	288	324	0.145129	489.333	379.4	-109.933	1.28976
Nicotinate-nucleotide pyrophosphorylase [carboxylating]	37	41	66	14	183	145	248	20	15	10	11	4	20	57	70	94	82	108	0.00229123	192	82.2	-109.8	2.33577
Solvent efflux pump periplasmic linker SrpA	27	28	54	6	134	99	203	9	15	8	5		4	57	56	43	0	22	0.00310927	145.333	35.6	-109.733	4.0824
Nitrogen fixation protein VnfA	26	12	53	4	129	43	199	6	4	5		1		15	35	0	21	0	0.00919842	123.667	14.2	-109.467	8.70892
Dihydroorotase	77	90	136	23	382	319	512	33	68	38	30	19	57	259	265	256	391	308	0.0449395	404.333	295.8	-108.533	1.36691
Phytochrome-like protein cph2	106	81	103	21	525	287	387	30	60	24	16	21	91	229	168	137	432	491	0.177334	399.667	291.4	-108.267	1.37154
C4-dicarboxylic acid transporter DauA	39	67	67	15	193	237	252	21	36	12	15	7	19	137	84	128	144	103	0.000776723	227.333	119.2	-108.133	1.90716
Chondroitinase-B	21	22	40	4	104	78	150	6		2				0	14	0	0	0	0.000244093	110.667	2.8	-107.867	39.5238
Magnesium and cobalt efflux protein CorC	26	80	24	11	129	283	90	16	15	5	8	4	11	57	35	68	82	59	0.0258606	167.333	60.2	-107.133	2.77962
Arabinose 5-phosphate isomerase KpsF	22	13	52	5	109	46	196	7	1		2	1	2	4	0	17	21	11	0.00814054	117	10.6	-106.4	11.0377
Pesticin receptor	26	33	80	10	129	117	301	14	25	9	9	5	8	95	63	77	103	43	0.0297234	182.333	76.2	-106.133	2.39283
3-phosphoshikimate 1-carboxyvinyltransferase	81	99	142	19	401	351	534	27	88	54	32	18	48	335	377	273	370	259	0.0426203	428.667	322.8	-105.867	1.32796
Regulatory protein MgsR	31	39	42	3	154	138	158	4	6	4	7	3	9	23	28	60	62	49	5.04053e-05	150	44.4	-105.6	3.37838
N-acetylmuramoyl-L-alanine amidase AmiB	36	19	44	10	178	67	166	14	14	1	4	1	8	53	7	34	21	43	0.00457435	137	31.6	-105.4	4.33544
Inner membrane protein YqaA	29	51	73	13	144	181	275	19	25	10	14	6	12	95	70	120	123	65	0.00907081	200	94.6	-105.4	2.11416
Xylose isomerase	33	56	61	18	164	198	229	26	31	14	13	3	13	118	98	111	62	70	0.000988953	197	91.8	-105.2	2.14597
3-isopropylmalate dehydratase small subunit 1	33	30	64	12	164	106	241	17	10	13	6	5	8	38	91	51	103	43	0.0101767	170.333	65.2	-105.133	2.61247
2%2C3%2C4%2C5-tetrahydropyridine-2%2C6-dicarboxylate N-succinyltransferase	35	26	45	15	173	92	169	21	23	6	1	1	7	88	42	9	21	38	0.00360146	144.667	39.6	-105.067	3.6532
Methyl-accepting chemotaxis protein IV	11	22	66	5	55	78	248	7	11	2	4		4	42	14	34	0	22	0.030652	127	22.4	-104.6	5.66964
Stage II sporulation protein E	37	50	48	10	183	177	181	14	19	15	6	4	13	72	105	51	82	70	5.88148e-05	180.333	76	-104.333	2.37281
Multidrug resistance protein MdtC	48	63	79	17	238	223	297	24	61	24	17	6	14	232	168	145	123	76	0.017182	252.667	148.8	-103.867	1.69803
Tryptophan--tRNA ligase	79	106	117	25	391	375	440	36	82	49	24	13	68	312	342	205	267	367	0.0223481	402	298.6	-103.4	1.34628
3%2C6-anhydro-alpha-L-galactonate cycloisomerase	10	36	35	3	50	128	132	4											0	103.333	0	-103.333	0
Methyl-accepting chemotaxis protein McpQ	42	16	28	4	208	57	105	6		1	8		5	0	7	68	0	27	0.015624	123.333	20.4	-102.933	6.04575
Fimbrium subunit Fim1C	37	28	68	4	183	99	256	6	22	5	21	1	12	84	35	179	21	65	0.0424646	179.333	76.8	-102.533	2.33507
Phosphate acyltransferase	87	107	132	24	431	379	497	34	82	53	32	15	75	312	370	273	308	405	0.0221364	435.667	333.6	-102.067	1.30596
Urease accessory protein UreG	16	9	57	2	79	32	214	3		3			2	0	21	0	0	11	0.0222314	108.333	6.4	-101.933	16.9271
Pyruvate kinase	44	126	94	15	218	446	354	21	53	27	30	10	62	202	188	256	206	335	0.070869	339.333	237.4	-101.933	1.42937
Bifunctional aspartokinase/homoserine dehydrogenase 1	40	58	92	20	198	205	346	28	40	21	23	6	23	152	147	196	123	124	0.021165	249.667	148.4	-101.267	1.68239
Multidrug resistance protein MdtK	34	35	54	5	168	124	203	7	10	5	6	4	21	38	35	51	82	113	0.0039562	165	63.8	-101.2	2.58621
tRNA pseudouridine synthase C	32	64	34	9	159	227	128	13	19	12	7	4	10	72	84	60	82	54	0.00220061	171.333	70.4	-100.933	2.43371
CRISPR-associated endonuclease Cas1	36	67	51	8	178	237	192	11	33	24	13	1	15	126	168	111	21	81	0.0142129	202.333	101.4	-100.933	1.9954
Flavin prenyltransferase UbiX	26	19	45	11	129	67	169	16	2	2	1	3	2	8	14	9	62	11	0.00387368	121.667	20.8	-100.867	5.84936
Single-stranded DNA-binding protein	82	138	140	28	406	489	527	40	113	61	46	10	76	431	426	393	206	410	0.0780462	474	373.2	-100.8	1.2701
Multidrug resistance protein MdtE	34	47	99	15	168	166	372	21	39	18	25	5	15	149	126	214	103	81	0.0678788	235.333	134.6	-100.733	1.74839
Pyrimidine/purine nucleoside phosphorylase	24	12	38	6	119	43	143	9					1	0	0	0	0	5	0.0019153	101.667	1	-100.667	101.667
putative ABC transporter solute-binding protein YclQ	29	29	18	2	144	103	68	3	3	1			1	11	7	0	0	5	0.000417903	105	4.6	-100.4	22.8261
Putative nucleoside permease NupX	40	32	21	13	198	113	79	19	5	6	2		13	19	42	17	0	70	0.00825879	130	29.6	-100.4	4.39189
Ferric-anguibactin transport system permease protein FatC	32	21	18	3	159	74	68	4											0	100.333	0	-100.333	0
4-hydroxy-3-methylbut-2-en-1-yl diphosphate synthase (ferredoxin)	40	58	99	11	198	205	372	16	52	25	20	7	19	198	174	171	144	103	0.0378958	258.333	158	-100.333	1.63502
Sporulation-specific N-acetylmuramoyl-L-alanine amidase	29	75	14	8	144	266	53	11	9	11	8		17	34	77	68	0	92	0.046507	154.333	54.2	-100.133	2.84748
HTH-type transcriptional regulator YesS	57	49	42	9	282	174	158	13	20	11	5	7	34	76	77	43	144	183	0.0325388	204.667	104.6	-100.067	1.95666
Insertion sequence IS5376 putative ATP-binding protein	49	41	35	15	243	145	132	21	19	9	10	4	12	72	63	85	82	65	0.00444988	173.333	73.4	-99.9333	2.36149
Inner membrane protein YrbG	83	116	114	30	411	411	429	43	72	50	39	17	52	274	349	333	350	281	0.00225104	417	317.4	-99.6	1.3138
Putative multidrug export ATP-binding/permease protein	134	121	188	31	664	429	707	44	139	63	46	26	112	530	440	393	535	604	0.130919	600	500.4	-99.6	1.19904
Galactose/methyl galactoside import ATP-binding protein MglA	107	62	69	14	530	220	260	20	64	47	18	4	70	244	328	154	82	378	0.182562	336.667	237.2	-99.4667	1.41934
Swarming motility protein SwrC	60	41	61	17	297	145	229	24	28	22	7	7	29	107	154	60	144	157	0.0246703	223.667	124.4	-99.2667	1.79796
Lysine exporter LysO	24	43	21	5	119	152	79	7	1		2	3	1	4	0	17	62	5	0.00191505	116.667	17.6	-99.0667	6.62879
Exoenzyme S synthesis regulatory protein ExsA	19	24	82	4	94	85	308	6	13	12	10	4	3	50	84	85	82	16	0.0644125	162.333	63.4	-98.9333	2.56046
Bifunctional transcriptional activator/DNA repair enzyme AdaA	31	53	50	3	154	188	188	4	20	11	7	2	25	76	77	60	41	135	0.00232012	176.667	77.8	-98.8667	2.27078
Transcriptional regulator SlyA	58	35	49	15	287	124	184	21	16	22	6	4	28	61	154	51	82	151	0.0369086	198.333	99.8	-98.5333	1.98731
Alkyl hydroperoxide reductase subunit F	26	30	23	8	129	106	87	11		4			3	0	28	0	0	16	7.60689e-05	107.333	8.8	-98.5333	12.197
Putative aminopeptidase YsdC	45	52	67	3	223	184	252	4	25	17	9	7	32	95	119	77	144	173	0.00543214	219.667	121.6	-98.0667	1.80647
D-galactarolactone cycloisomerase	26	25	21	2	129	89	79	3					1	0	0	0	0	5	6.27643e-05	99	1	-98	99
Anti-sigma F factor	41	62	40	12	203	220	150	17	24	15	5	6	19	91	105	43	123	103	0.00305067	191	93	-98	2.05376
L-threonine dehydratase biosynthetic IlvA	23	16	38	10	114	57	143	14		1	2		2	0	7	17	0	11	0.00105541	104.667	7	-97.6667	14.9524
ATP-dependent RNA helicase DbpA	46	64	47	22	228	227	177	31	12	11	13	11	20	46	77	111	226	108	0.0311388	210.667	113.6	-97.0667	1.85446
Ribosomal RNA large subunit methyltransferase I	66	89	157	16	327	315	591	23	88	50	33	16	51	335	349	282	329	275	0.103856	411	314	-97	1.30892
Urease accessory protein UreE	15	9	51	2	74	32	192	3		1			1	0	7	0	0	5	0.0162788	99.3333	2.4	-96.9333	41.3889
Oxygen sensor histidine kinase NreB	19	19	47	6	94	67	177	9	6	4	2		2	23	28	17	0	11	0.00413195	112.667	15.8	-96.8667	7.1308
GTPase Obg/CgtA	26	33	52	13	129	117	196	19	18	10	6		12	69	70	51	0	65	0.00431532	147.333	51	-96.3333	2.88889
tRNA uridine 5-carboxymethylaminomethyl modification enzyme MnmG	97	145	171	33	481	514	643	47	120	65	49	19	98	457	454	418	391	529	0.0448357	546	449.8	-96.2	1.21387
Ribosomal protein S6--L-glutamate ligase	37	32	27	16	183	113	102	23	7	15	1		8	27	105	9	0	43	0.0105867	132.667	36.8	-95.8667	3.60507
Adenosylmethionine-8-amino-7-oxononanoate aminotransferase	24	40	33	6	119	142	124	9	8	4	4	1	10	30	28	34	21	54	2.13866e-05	128.333	33.4	-94.9333	3.84232
putative ABC transporter ATP-binding protein YheS	69	128	142	30	342	453	534	43	90	49	36	21	59	343	342	307	432	318	0.0540628	443	348.4	-94.6	1.27153
Inner spore coat protein H	35	6	69	6	173	21	260	9	25	7	2	4	8	95	49	17	82	43	0.0669014	151.333	57.2	-94.1333	2.64569
Peptide deformylase 1	54	45	64	13	268	159	241	19	29	23	12	4	35	110	161	102	82	189	0.0196183	222.667	128.8	-93.8667	1.72878
DNA polymerase I	89	154	151	30	441	545	568	43	97	72	40	21	88	370	503	342	432	475	0.0541106	518	424.4	-93.6	1.22055
Thiazole synthase	27	41	73	9	134	145	275	13	17	11	5	9	16	65	77	43	185	86	0.0456067	184.667	91.2	-93.4667	2.02485
RNA polymerase-binding transcription factor DksA	38	33	63	13	188	117	237	19	20	10	15	4	15	76	70	128	82	81	0.00905608	180.667	87.4	-93.2667	2.06712
V-type ATP synthase subunit D	32	60	62	14	159	213	233	20	42	17	8	5	17	160	119	68	103	92	0.0058221	201.667	108.4	-93.2667	1.86039
Ferric-anguibactin transport system permease protein FatD	32	18	15	1	159	64	56	1											0	93	0	-93	0
CRISPR-associated endoribonuclease Cas2	34	57	51	4	168	202	192	6	34	24	10	1	13	130	168	85	21	70	0.018156	187.333	94.8	-92.5333	1.97609
Vitamin B12 transporter BtuB	89	134	217	41	441	475	816	58	173	79	69	16	55	659	551	589	329	297	0.252651	577.333	485	-92.3333	1.19038
Acetyl-coenzyme A carboxylase carboxyl transferase subunit beta	37	47	47	12	183	166	177	17	13	7	6	5	30	50	49	51	103	162	0.0107225	175.333	83	-92.3333	2.11245
putative ABC transporter ATP-binding protein YxlF	83	111	57	11	411	393	214	16	44	42	16	15	61	168	293	137	308	329	0.116689	339.333	247	-92.3333	1.37382
Germination protease	35	37	44	8	173	131	166	11	16	10	4	4	14	61	70	34	82	76	0.000381609	156.667	64.6	-92.0667	2.42518
putative ABC transporter ATP-binding protein YlmA	37	29	87	9	183	103	327	13	19	16	15	8	16	72	112	128	164	86	0.06524	204.333	112.4	-91.9333	1.81791
Aldose 1-epimerase	103	150	181	26	510	531	681	37	127	63	61	25	84	484	440	521	514	453	0.0433549	574	482.4	-91.6	1.18988
L-arabinose transport system permease protein AraQ	155	151	146	16	768	535	549	23	88	80	24	23	196	335	558	205	473	1058	0.333437	617.333	525.8	-91.5333	1.17408
Urease accessory protein UreF	13	7	53	2	64	25	199	3		1			3	0	7	0	0	16	0.0281396	96	4.6	-91.4	20.8696
Efflux pump periplasmic linker BepF	60	60	53	16	297	213	199	23	34	21	24	5	26	130	147	205	103	140	0.0138481	236.333	145	-91.3333	1.62989
putative HTH-type transcriptional regulator YgaV	13	24	34	7	64	85	128	10					1	0	0	0	0	5	0.000288776	92.3333	1	-91.3333	92.3333
PEP-dependent dihydroxyacetone kinase 2%2C ADP-binding subunit DhaL	28	5	40	4	139	18	150	6	2	4	1		2	8	28	9	0	11	0.013764	102.333	11.2	-91.1333	9.1369
Putative oxidoreductase SadH	23	33	44	9	114	117	166	13	20	12	3		4	76	84	26	0	22	0.00550834	132.333	41.6	-90.7333	3.18109
Epimerase family protein	20	24	29	9	99	85	109	13		1	2		2	0	7	17	0	11	5.03965e-06	97.6667	7	-90.6667	13.9524
All-trans-nonaprenyl-diphosphate synthase (geranyl-diphosphate specific)	20	31	62	7	99	110	233	10	21	5	7	3	9	80	35	60	62	49	0.0168824	147.333	57.2	-90.1333	2.57576
Pyruvate formate-lyase 1-activating enzyme	63	82	78	20	312	290	293	28	42	30	20	12	47	160	209	171	247	254	0.00666131	298.333	208.2	-90.1333	1.43292
Cysteine desulfurase	31	54	89	8	154	191	335	11	37	23	14	9	15	141	161	120	185	81	0.0527632	226.667	137.6	-89.0667	1.64729
Phosphate-binding protein PstS 1	27	39	17	3	134	138	64	4	7		2	2	6	27	0	17	41	32	0.0021525	112	23.4	-88.6	4.78632
Chromosome-partitioning protein Spo0J	32	39	40	4	159	138	150	6	23	7	7	1	16	88	49	60	21	86	0.00107469	149	60.8	-88.2	2.45066
Beta-glucosidase BoGH3B	60	90	111	12	297	319	418	17	69	46	37	11	29	263	321	316	226	157	0.0608413	344.667	256.6	-88.0667	1.34321
Aldehyde-alcohol dehydrogenase	55	87	44	12	273	308	166	17	32	20	12	11	40	122	140	102	226	216	0.0519639	249	161.2	-87.8	1.54467
Oligopeptide transport ATP-binding protein OppD	131	109	112	25	649	386	421	36	94	54	39	21	91	358	377	333	432	491	0.133137	485.333	398.2	-87.1333	1.21882
Ferredoxin-dependent glutamate synthase 1	61	78	87	20	302	276	327	28	39	31	16	17	41	149	216	137	350	221	0.0713872	301.667	214.6	-87.0667	1.40572
Glutamate racemase	61	79	106	15	302	280	399	21	56	33	26	15	42	213	230	222	308	227	0.0242487	327	240	-87	1.3625
Endoribonuclease EndoA	28	56	33	7	139	198	124	10	19	8	8	3	14	72	56	68	62	76	0.00115351	153.667	66.8	-86.8667	2.3004
P-protein	73	88	118	23	362	312	444	33	56	45	28	15	66	213	314	239	308	356	0.0506322	372.667	286	-86.6667	1.30303
HTH-type transcriptional repressor PurR	53	30	33	5	263	106	124	7	14	12	1	5	26	53	84	9	103	140	0.057019	164.333	77.8	-86.5333	2.11225
ICEBs1 excisionase	36	8	30	3	178	28	113	4	3	4	4		5	11	28	34	0	27	0.0194845	106.333	20	-86.3333	5.31667
Glutamate 5-kinase	57	61	124	22	282	216	466	31	43	23	26	16	56	164	161	222	329	302	0.137978	321.333	235.6	-85.7333	1.36389
Hydroxyethylthiazole kinase	34	36	60	7	168	128	226	10	20	10	13	4	19	76	70	111	82	103	0.00521402	174	88.4	-85.6	1.96833
Cellulose synthase catalytic subunit [UDP-forming]	39	18	6	3	193	64	23	4	2		1		4	8	0	9	0	22	0.0321228	93.3333	7.8	-85.5333	11.9658
Phosphate-binding protein PstS 2	20	16	33	8	99	57	124	11				2		0	0	0	41	0	0.00160475	93.3333	8.2	-85.1333	11.3821
putative phospholipid ABC transporter-binding protein MlaD	28	19	38	9	139	67	143	13	9	4	6		8	34	28	51	0	43	0.00369663	116.333	31.2	-85.1333	3.72863
Polyol:NADP oxidoreductase	49	21	88	12	243	74	331	17	30	17	20	7	20	114	119	171	144	108	0.0944649	216	131.2	-84.8	1.64634
Acetyl-coenzyme A carboxylase carboxyl transferase subunit alpha	35	42	41	9	173	149	154	13	11	6	5	5	26	42	42	43	103	140	0.0108957	158.667	74	-84.6667	2.14414
Urease accessory protein UreH	13	8	44	1	64	28	166	1		1				0	7	0	0	0	0.0156297	86	1.4	-84.6	61.4286
Histidine biosynthesis bifunctional protein HisB	52	47	115	16	258	166	433	23	49	32	20	12	33	187	223	171	247	178	0.105682	285.667	201.2	-84.4667	1.41981
Dipeptidyl carboxypeptidase	35	23	106	13	173	81	399	19	50	25	18	3	16	190	174	154	62	86	0.156483	217.667	133.2	-84.4667	1.63413
HTH-type transcriptional regulator LeuO	43	7	4	7	213	25	15	10											0	84.3333	0	-84.3333	0
putative response regulatory protein	89	45	62	7	441	159	233	10	20	41	10	8	66	76	286	85	164	356	0.207428	277.667	193.4	-84.2667	1.43571
Putative monooxygenase YcnE	17	37	40	1	84	131	150	1	8	7	1	3	7	30	49	9	62	38	0.00203153	121.667	37.6	-84.0667	3.23582
Stage V sporulation protein AD	30	46	46	6	149	163	173	9	21	14	5	4	16	80	98	43	82	86	0.00037567	161.667	77.8	-83.8667	2.07798
Oxygen-insensitive NAD(P)H nitroreductase	19	32	23	4	94	113	87	6	1	2	6		1	4	14	51	0	5	0.0004488	98	14.8	-83.2	6.62162
Anaerobic sulfatase-maturating enzyme	84	101	108	16	416	358	406	23	69	50	36	15	60	263	349	307	308	324	0.00540407	393.333	310.2	-83.1333	1.268
Ribosomal RNA small subunit methyltransferase H	111	164	186	33	550	581	700	47	128	76	58	26	109	488	530	495	535	588	0.0443719	610.333	527.2	-83.1333	1.15769
Cell division protein FtsA	74	114	146	27	367	404	549	38	101	61	43	12	67	385	426	367	247	362	0.0980042	440	357.4	-82.6	1.23111
Glycine dehydrogenase (decarboxylating)	21	49	33	10	104	174	124	14	35	7	5		6	133	49	43	0	32	0.0234957	134	51.4	-82.6	2.607
Putative transport protein	44	28	57	5	218	99	214	7	20	11	12	4	25	76	77	102	82	135	0.021212	177	94.4	-82.6	1.875
Peptide chain release factor RF3	25	7	38	8	124	25	143	11		2	2	1	4	0	14	17	21	22	0.0115397	97.3333	14.8	-82.5333	6.57658
Electron transport complex subunit RsxB	133	165	196	33	659	584	737	47	135	88	64	31	107	514	614	547	637	577	0.0546892	660	577.8	-82.2	1.14226
Fe(3+) dicitrate transport ATP-binding protein FecE	21	41	44	4	104	145	166	6	14	10	5	3	10	53	70	43	62	54	0.000685743	138.333	56.4	-81.9333	2.45272
Formyltetrahydrofolate deformylase	35	26	53	12	173	92	199	17	16	9	11	5	8	61	63	94	103	43	0.0129464	154.667	72.8	-81.8667	2.12454
Stage V sporulation protein T	33	46	32	6	164	163	120	9	19	10	6	3	15	72	70	51	62	81	0.00031142	149	67.2	-81.8	2.21726
Multidrug resistance protein MexB	17	17	48	10	84	60	181	14	4	5	3	2	3	15	35	26	41	16	0.0130855	108.333	26.6	-81.7333	4.07268
Electron transport complex subunit RnfC	71	107	140	21	352	379	527	30	102	64	31	12	63	389	447	265	247	340	0.123851	419.333	337.6	-81.7333	1.2421
Efflux pump membrane transporter BepG	33	31	27	4	164	110	102	6	10	7	6		15	38	49	51	0	81	0.00551175	125.333	43.8	-81.5333	2.86149
Spermidine/putrescine-binding periplasmic protein	63	72	44	11	312	255	166	16	31	20	21	12	24	118	140	179	247	130	0.0566682	244.333	162.8	-81.5333	1.50082
Farnesyl diphosphate synthase	76	67	100	22	377	237	376	31	48	38	22	13	63	183	265	188	267	340	0.082748	330	248.6	-81.4	1.32743
Superoxide dismutase [Fe]	18	29	23	2	89	103	87	3	5	1	2		3	19	7	17	0	16	5.26126e-06	93	11.8	-81.2	7.88136
Unsaturated glucuronyl hydrolase	24	7	37	6	119	25	139	9	3	4			5	11	28	0	0	27	0.0118496	94.3333	13.2	-81.1333	7.14646
N-acetylornithine carbamoyltransferase	24	37	80	9	119	131	301	13	21	16	15	6	13	80	112	128	123	70	0.0630569	183.667	102.6	-81.0667	1.79012
Stage 0 sporulation protein A	41	57	39	14	203	202	147	20	21	29	5	4	20	80	202	43	82	108	0.0392362	184	103	-81	1.78641
putative methylmalonyl-CoA mutase small subunit	18	25	48	6	89	89	181	9	14	5	4	3	2	53	35	34	62	11	0.00941513	119.667	39	-80.6667	3.06838
Alpha-galactosidase	43	44	14	15	213	156	53	21	9	15	5		22	34	105	43	0	119	0.0634704	140.667	60.2	-80.4667	2.33666
Solute-binding protein	54	17	81	6	268	60	305	9	60	18	8	7	16	229	126	68	144	86	0.13806	211	130.6	-80.4	1.61562
Beta-agarase	9	16	37	1	45	57	139	1											0	80.3333	0	-80.3333	0
Hydrogen peroxide-inducible genes activator	53	31	61	15	263	110	229	21	20	14	21	5	27	76	98	179	103	146	0.052025	200.667	120.4	-80.2667	1.66667
Glycine cleavage system transcriptional activator	42	10	1	8	208	35	4	11		1			1	0	7	0	0	5	0.0678354	82.3333	2.4	-79.9333	34.3056
Ribonuclease BN	67	73	96	15	332	259	361	21	68	29	35	10	41	259	202	299	206	221	0.0260015	317.333	237.4	-79.9333	1.3367
Anthranilate synthase component 1	70	64	125	19	347	227	470	27	53	43	30	16	47	202	300	256	329	254	0.111967	348	268.2	-79.8	1.29754
Formate-dependent phosphoribosylglycinamide formyltransferase	36	22	75	10	178	78	282	14	19	13	15	8	8	72	91	128	164	43	0.086165	179.333	99.6	-79.7333	1.80054
Ubiquinone biosynthesis O-methyltransferase	50	68	28	12	248	241	105	17	43	17	7	5	27	164	119	60	103	146	0.0521686	198	118.4	-79.6	1.6723
4-hydroxybenzoate octaprenyltransferase	28	18	48	11	139	64	181	16	13	3	12	1	9	50	21	102	21	49	0.0234562	128	48.6	-79.4	2.63374
putative symporter YidK	25	22	12	5	124	78	45	7	1				2	4	0	0	0	11	0.00170809	82.3333	3	-79.3333	27.4444
tRNA/tmRNA (uracil-C(5))-methyltransferase	20	13	28	5	99	46	105	7			1		2	0	0	9	0	11	0.00066923	83.3333	4	-79.3333	20.8333
Fosmidomycin resistance protein	19	16	56	4	94	57	211	6	5	2	10	3	5	19	14	85	62	27	0.0427203	120.667	41.4	-79.2667	2.91465
Transketolase 1	29	22	27	8	144	78	102	11	10	4	6		5	38	28	51	0	27	0.00228091	108	28.8	-79.2	3.75
Lysine--tRNA ligase%2C heat inducible	26	36	53	15	129	128	199	21	22	12	10	3	9	84	84	85	62	49	0.00353443	152	72.8	-79.2	2.08791
Stage V sporulation protein D	83	105	87	12	411	372	327	17	73	45	28	13	66	278	314	239	267	356	0.0248267	370	290.8	-79.2	1.27235
RNA polymerase sigma-54 factor	48	67	91	15	238	237	342	21	63	30	26	7	28	240	209	222	144	151	0.0357666	272.333	193.2	-79.1333	1.40959
Serine/threonine exchanger SteT	15	20	33	17	74	71	124	24	1	1		1	4	4	7	0	21	22	0.000649777	89.6667	10.8	-78.8667	8.30247
Manganese transport system membrane protein MntB	14	20	29	3	69	71	109	4	1	1			2	4	7	0	0	11	0.000106806	83	4.4	-78.6	18.8636
Peptidyl-prolyl cis-trans isomerase B	46	55	57	17	228	195	214	24	23	23	13	8	27	88	161	111	164	146	0.00487913	212.333	134	-78.3333	1.58458
putative FKBP-type peptidyl-prolyl cis-trans isomerase	16	25	45	7	79	89	169	10	17	4	6	1	1	65	28	51	21	5	0.0104984	112.333	34	-78.3333	3.30392
Ferredoxin%2C 2Fe-2S	13	4	45	3	64	14	169	4				1		0	0	0	21	0	0.0301299	82.3333	4.2	-78.1333	19.6032
Arsenical resistance operon repressor	25	20	15	1	124	71	56	1			2		2	0	0	17	0	11	0.00129779	83.6667	5.6	-78.0667	14.9405
ABC transporter ATP-binding protein YtrB	76	61	78	9	377	216	293	13	50	36	14	13	48	190	251	120	267	259	0.0863332	295.333	217.4	-77.9333	1.35848
Signal peptidase I	52	75	100	15	258	266	376	21	72	35	27	10	29	274	244	231	206	157	0.0443542	300	222.4	-77.6	1.34892
RNA-binding riboflavin kinase RibR	11	10	50	6	55	35	188	9	2	4	1	1	2	8	28	9	21	11	0.0360506	92.6667	15.4	-77.2667	6.01732
Homoserine/homoserine lactone efflux protein	39	16	9	8	193	57	34	11	4	3	1	1	4	15	21	9	21	22	0.0392388	94.6667	17.6	-77.0667	5.37879
Ribosomal RNA large subunit methyltransferase F	19	14	24	3	94	50	90	4					1	0	0	0	0	5	0.000151485	78	1	-77	78
Acetate kinase	101	134	141	34	500	475	530	48	122	67	37	19	90	465	468	316	391	486	0.0662425	501.667	425.2	-76.4667	1.17984
[LysW]-aminoadipate semialdehyde transaminase	30	19	64	11	149	67	241	16	18	11	12	3	13	69	77	102	62	70	0.0451371	152.333	76	-76.3333	2.00439
putative metal-dependent hydrolase YjjV	21	22	44	5	104	78	166	7	8	4	3	3	10	30	28	26	62	54	0.00616685	116	40	-76	2.9
Dihydroorotate dehydrogenase B (NAD(+))%2C catalytic subunit	78	105	140	29	386	372	527	41	87	52	35	18	74	331	363	299	370	399	0.0631823	428.333	352.4	-75.9333	1.21547
Bacteriohemerythrin	9	9	50	1	45	32	188	1	4		1		7	15	0	9	0	38	0.0452227	88.3333	12.4	-75.9333	7.12366
Spore maturation protein B	40	57	62	15	198	202	233	21	36	26	14	5	25	137	181	120	103	135	0.00368676	211	135.2	-75.8	1.56065
Transcriptional regulatory protein YpdB	78	40	94	8	386	142	354	11	49	20	30	10	56	187	140	256	206	302	0.151319	294	218.2	-75.8	1.34739
Coenzyme A biosynthesis bifunctional protein CoaBC	76	112	142	18	377	397	534	26	87	40	40	25	62	331	279	342	514	335	0.141915	436	360.2	-75.8	1.21044
2-iminobutanoate/2-iminopropanoate deaminase	90	97	106	25	446	344	399	36	86	44	36	19	50	328	307	307	391	270	0.0343434	396.333	320.6	-75.7333	1.23622
Oxygen regulatory protein NreC	51	46	126	18	253	163	474	26	80	33	21	13	23	305	230	179	267	124	0.189827	296.667	221	-75.6667	1.34238
L-threonine 3-dehydrogenase	21	26	30	7	104	92	113	10	9	6	4		5	34	42	34	0	27	0.000195078	103	27.4	-75.6	3.75912
HTH-type transcriptional regulator YidZ	42	6	0	2	208	21	0	3					1	0	0	0	0	5	0.0849232	76.3333	1	-75.3333	76.3333
Ribonuclease D	41	64	90	13	203	227	339	19	49	24	27	9	25	187	168	231	185	135	0.0441889	256.333	181.2	-75.1333	1.41464
Dihydrolipoyl dehydrogenase	65	69	72	12	322	244	271	17	53	32	22	13	26	202	223	188	267	140	0.0299934	279	204	-75	1.36765
PTS system 2-O-alpha-mannosyl-D-glycerate-specific EIIABC component	27	11	16	8	134	39	60	11			1		1	0	0	9	0	5	0.00615025	77.6667	2.8	-74.8667	27.7381
sn-glycerol-3-phosphate-binding periplasmic protein UgpB	15	37	24	2	74	131	90	3	3	6			12	11	42	0	0	65	0.00621412	98.3333	23.6	-74.7333	4.16667
Hydrazine synthase subunit gamma	17	3	35	6	84	11	132	9					1	0	0	0	0	5	0.0136218	75.6667	1	-74.6667	75.6667
Aldo/keto reductase	9	35	22	2	45	124	83	3	3	2			4	11	14	0	0	22	0.0027174	84	9.4	-74.6	8.93617
Biopolymer transport protein ExbB	21	56	18	12	104	198	68	17	12	7	7	3	5	46	49	60	62	27	0.0224564	123.333	48.8	-74.5333	2.52732
Ribose import permease protein RbsC	101	66	65	11	500	234	244	16	97	37	26	2	68	370	258	222	41	367	0.247517	326	251.6	-74.4	1.29571
Oligopeptidase A	38	52	76	23	188	184	286	33	33	21	23	8	17	126	147	196	164	92	0.0349164	219.333	145	-74.3333	1.51264
Penicillin-binding protein 2B	19	38	28	4	94	135	105	6	6	5	5	2	8	23	35	43	41	43	0.000177378	111.333	37	-74.3333	3.00901
putative metal-dependent hydrolase YcfH	45	66	62	13	223	234	233	19	37	30	10	7	37	141	209	85	144	200	0.0245347	230	155.8	-74.2	1.47625
DNA-binding transcriptional regulator NtrC	46	23	61	12	228	81	229	17	26	16	14	5	17	99	112	120	103	92	0.044266	179.333	105.2	-74.1333	1.70469
Phosphate-import permease protein PhnE	21	34	20	5	104	120	75	7	4	1	2	3	5	15	7	17	62	27	0.00182045	99.6667	25.6	-74.0667	3.89323
Transposon gamma-delta resolvase	28	28	20	4	139	99	75	6	11	3	3	2	4	42	21	26	41	22	0.00129684	104.333	30.4	-73.9333	3.43202
Membrane-bound lytic murein transglycosylase C	32	20	25	4	159	71	94	6	12	5	3	1	8	46	35	26	21	43	0.00541827	108	34.2	-73.8	3.15789
Peptidase T	86	81	114	18	426	287	429	26	72	49	40	16	46	274	342	342	329	248	0.068238	380.667	307	-73.6667	1.23996
3-hydroxy-5-phosphonooxypentane-2%2C4-dione thiolase	17	14	31	6	84	50	117	9	2	3	2		1	8	21	17	0	5	0.00137474	83.6667	10.2	-73.4667	8.20261
Bifunctional enzyme CysN/CysC	23	21	38	12	114	74	143	17	15	7	3	1	6	57	49	26	21	32	0.00268478	110.333	37	-73.3333	2.98198
ATP-dependent RNA helicase CshA	24	43	57	9	119	152	214	13	18	9	12	7	12	69	63	102	144	65	0.0228069	161.667	88.6	-73.0667	1.82468
L-serine dehydratase 2	21	35	21	5	104	124	79	7	7	4	4	1	7	27	28	34	21	38	0.000200249	102.333	29.6	-72.7333	3.45721
Transcriptional regulatory protein SrrA	128	117	128	23	634	414	481	33	79	59	30	30	111	301	412	256	617	599	0.266575	509.667	437	-72.6667	1.16629
HTH-type transcriptional regulator PgrR	40	6	3	7	198	21	11	10	1				3	4	0	0	0	16	0.0769799	76.6667	4	-72.6667	19.1667
Outer membrane protein MIP	19	61	47	3	94	216	177	4	23	8	9	9	8	88	56	77	185	43	0.069407	162.333	89.8	-72.5333	1.80772
Cell surface protein	26	12	31	1	129	43	117	1	11	1			13	42	7	0	0	70	0.0181845	96.3333	23.8	-72.5333	4.04762
UDP-glucose 6-dehydrogenase TuaD	19	36	56	6	94	128	211	9	20	10	7	3	17	76	70	60	62	92	0.0171357	144.333	72	-72.3333	2.00463
Acetyl-CoA:oxalate CoA-transferase	14	13	31	4	69	46	117	6	2	1			2	8	7	0	0	11	0.0017775	77.3333	5.2	-72.1333	14.8718
DNA polymerase III subunit beta	0	61	0	3	0	216	0	4											0	72	0	-72	0
Dipeptide transport system permease protein DppC	36	25	23	6	178	89	87	9	9	6	4	3	11	34	42	34	62	59	0.0108914	118	46.2	-71.8	2.55411
Diaminopimelate epimerase	91	113	136	26	451	400	512	37	111	57	42	17	71	423	398	359	350	383	0.0254707	454.333	382.6	-71.7333	1.18749
Transcriptional regulator KdgR	23	20	20	2	114	71	75	3		2	1	2	2	0	14	9	41	11	0.000944103	86.6667	15	-71.6667	5.77778
Putative glutamine amidotransferase	42	27	89	12	208	96	335	17	29	18	19	8	27	110	126	162	164	146	0.110597	213	141.6	-71.4	1.50424
HTH-type transcriptional activator Btr	76	71	59	9	377	251	222	13	38	27	27	10	54	145	188	231	206	291	0.0920797	283.333	212.2	-71.1333	1.33522
DNA helicase II	16	33	39	9	79	117	147	13	10	7	7	1	9	38	49	60	21	49	0.00280789	114.333	43.4	-70.9333	2.63441
L-serine dehydratase%2C alpha chain	26	15	34	4	129	53	128	6	5	3	6	2	6	19	21	51	41	32	0.00629601	103.333	32.8	-70.5333	3.15041
PTS system mannose-specific EIIBCA component	33	14	4	4	164	50	15	6		2			3	0	14	0	0	16	0.0392821	76.3333	6	-70.3333	12.7222
Putative prophage phiRv2 integrase	36	19	41	7	178	67	154	10	17	4	15	2	10	65	28	128	41	54	0.0421751	133	63.2	-69.8	2.10443
Glucosamine-6-phosphate deaminase 1	42	42	48	13	208	149	181	19	26	27	15	2	17	99	188	128	41	92	0.0447198	179.333	109.6	-69.7333	1.63625
2-amino-4-hydroxy-6-hydroxymethyldihydropteridine pyrophosphokinase	44	50	39	13	218	177	147	19	31	16	20	2	21	118	112	171	41	113	0.0341731	180.667	111	-69.6667	1.62763
Exo-beta-D-glucosaminidase	30	34	70	3	149	120	263	4	37	26	10	3	13	141	181	85	62	70	0.0831973	177.333	107.8	-69.5333	1.64502
Protein LacX%2C plasmid	55	19	76	18	273	67	286	26	37	18	19	6	27	141	126	162	123	146	0.118798	208.667	139.6	-69.0667	1.49475
HTH-type transcriptional activator CmpR	34	35	29	1	168	124	109	1	14	10	5	4	14	53	70	43	82	76	0.00266792	133.667	64.8	-68.8667	2.06276
Membrane lipoprotein TmpC	42	39	27	10	208	138	102	14	24	17	3	1	27	91	119	26	21	146	0.0691852	149.333	80.6	-68.7333	1.85277
H(+)/Cl(-) exchange transporter ClcA	51	60	66	13	253	213	248	19	54	29	19	8	21	206	202	162	164	113	0.0150075	238	169.4	-68.6	1.40496
High-affinity zinc uptake system ATP-binding protein ZnuC	38	44	52	5	188	156	196	7	19	19	7	9	20	72	133	60	185	108	0.0355907	180	111.6	-68.4	1.6129
Iron(3+)-hydroxamate import ATP-binding protein FhuC	31	36	33	3	154	128	124	4	21	9	4	4	14	80	63	34	82	76	0.00123989	135.333	67	-68.3333	2.0199
30S ribosome-binding factor	37	29	93	17	183	103	350	24	50	21	10	5	36	190	147	85	103	194	0.152339	212	143.8	-68.2	1.47427
putative chromosome-partitioning protein ParB	50	70	69	12	248	248	260	17	57	22	23	9	31	217	154	196	185	167	0.00192976	252	183.8	-68.2	1.37106
putative chromate transport protein	72	96	132	19	357	340	497	27	97	48	37	14	63	370	335	316	288	340	0.0719392	398	329.8	-68.2	1.20679
Diadenosine hexaphosphate hydrolase	23	44	79	10	114	156	297	14	41	24	8	3	28	156	168	68	62	151	0.11449	189	121	-68	1.56198
Transcriptional regulatory protein DegU	42	57	62	11	208	202	233	16	28	24	18	4	41	107	168	154	82	221	0.043001	214.333	146.4	-67.9333	1.46403
Putative outer membrane protein	6	18	31	7	30	64	117	10		1			1	0	7	0	0	5	0.00533179	70.3333	2.4	-67.9333	29.3056
Protein TraC	20	13	20	2	99	46	75	3	1	1			3	4	7	0	0	16	0.000615801	73.3333	5.4	-67.9333	13.5802
DNA polymerase III subunit gamma/tau	53	106	102	17	263	375	384	24	60	43	28	14	57	229	300	239	288	308	0.0531139	340.667	272.8	-67.8667	1.24878
Thymidylate synthase ThyX	6	60	4	4	30	213	15	6	3	1	2	2	3	11	7	17	41	16	0.100817	86	18.4	-67.6	4.67391
Carboxynorspermidine/carboxyspermidine decarboxylase	43	53	92	9	213	188	346	13	39	20	25	11	33	149	140	214	226	178	0.0811093	249	181.4	-67.6	1.37266
Butyrate kinase 2	30	43	74	12	149	152	278	17	35	26	12	3	28	133	181	102	62	151	0.0775255	193	125.8	-67.2	1.53418
Stage III sporulation protein AE	27	33	19	4	134	117	71	6	10	11	2	1	9	38	77	17	21	49	0.00762727	107.333	40.4	-66.9333	2.65677
Xylulose kinase	98	109	105	18	486	386	395	26	99	55	37	12	84	377	384	316	247	453	0.122083	422.333	355.4	-66.9333	1.18833
PTS system mannitol-specific EIICB component	23	1	25	4	114	4	94	6	2				2	8	0	0	0	11	0.0181572	70.6667	3.8	-66.8667	18.5965
Fructose-1-phosphate phosphatase YqaB	23	23	43	2	114	81	162	3	12	7	10		15	46	49	85	0	81	0.0230917	119	52.2	-66.8	2.27969
UDP-N-acetylglucosamine--N-acetylmuramyl-(pentapeptide) pyrophosphoryl-undecaprenol N-acetylglucosamine transferase	111	144	184	29	550	510	692	41	137	76	53	25	105	522	530	453	514	567	0.103495	584	517.2	-66.8	1.12916
Periplasmic dipeptide transport protein	35	13	16	11	173	46	60	16	12	3	2	1	5	46	21	17	21	27	0.0346353	93	26.4	-66.6	3.52273
Nuclease	53	78	109	14	263	276	410	20	80	28	33	13	37	305	195	282	267	200	0.0962349	316.333	249.8	-66.5333	1.26635
Crossover junction endodeoxyribonuclease RuvC	69	134	138	26	342	475	519	37	123	48	50	16	62	469	335	427	329	335	0.135734	445.333	379	-66.3333	1.17502
GTPase HflX	76	113	130	25	377	400	489	36	84	48	39	23	59	320	335	333	473	318	0.102492	422	355.8	-66.2	1.18606
RecBCD enzyme subunit RecB	21	23	24	6	104	81	90	9	6	5	2	1	6	23	35	17	21	32	3.04682e-05	91.6667	25.6	-66.0667	3.58073
SpoIVB peptidase	31	51	33	3	154	181	124	4	22	18	6	4	17	84	126	51	82	92	0.00821144	153	87	-66	1.75862
Primosomal protein N'	92	134	177	29	456	475	666	41	127	69	50	20	98	484	482	427	411	529	0.144904	532.333	466.6	-65.7333	1.14088
Sodium/glucose cotransporter	88	70	181	41	436	248	681	58	95	47	51	26	53	362	328	436	535	286	0.284098	455	389.4	-65.6	1.16846
Heat shock protein 15	34	55	73	16	168	195	275	23	48	21	18	7	20	183	147	154	144	108	0.0303013	212.667	147.2	-65.4667	1.44475
Lipoprotein LipO	26	26	38	1	129	92	143	1	27	2	3	3	14	103	14	26	62	76	0.0185265	121.333	56.2	-65.1333	2.15896
Urease subunit gamma	12	2	38	2	59	7	143	3		1			3	0	7	0	0	16	0.0338495	69.6667	4.6	-65.0667	15.1449
PTS-dependent dihydroxyacetone kinase%2C dihydroxyacetone-binding subunit DhaK	25	19	44	13	124	67	166	19	24	5	10	1	7	91	35	85	21	38	0.0304907	119	54	-65	2.2037
Cytochrome c4	22	13	10	11	109	46	38	16											0	64.3333	0	-64.3333	0
RNA polymerase sigma-F factor	32	47	29	7	159	166	109	10	19	17	5	4	16	72	119	43	82	86	0.0109529	144.667	80.4	-64.2667	1.79934
Type III pantothenate kinase	79	105	143	18	391	372	538	26	105	57	34	15	84	400	398	290	308	453	0.14892	433.667	369.8	-63.8667	1.17271
putative transporter YycB	3	47	6	0	15	166	23	0					4	0	0	0	0	22	0.0651651	68	4.4	-63.6	15.4545
Periplasmic oligopeptide-binding protein	24	14	16	4	119	50	60	6				1	8	0	0	0	21	43	0.00853633	76.3333	12.8	-63.5333	5.96354
Protease 4	45	56	94	8	223	198	354	11	61	31	26	9	22	232	216	222	185	119	0.102424	258.333	194.8	-63.5333	1.32615
HTH-type transcriptional activator HxlR	20	39	48	10	99	138	181	14	38	1	15	2	11	145	7	128	41	59	0.0777248	139.333	76	-63.3333	1.83333
tRNA 2-selenouridine synthase	11	21	17	0	55	74	64	0					1	0	0	0	0	5	2.76961e-06	64.3333	1	-63.3333	64.3333
L-glyceraldehyde 3-phosphate reductase	51	50	92	8	253	177	346	11	59	32	26	5	38	225	223	222	103	205	0.115953	258.667	195.6	-63.0667	1.32243
Biotin synthase	31	67	41	8	154	237	154	11	27	8	15	7	30	103	56	128	144	162	0.0472736	181.667	118.6	-63.0667	1.53176
Alpha-amylase 2	19	30	52	5	94	106	196	7	22	12	9	3	7	84	84	77	62	38	0.0265803	132	69	-63	1.91304
putative MFS-type transporter YhjX	45	35	22	12	223	124	83	17	24	9	11	2	21	91	63	94	41	113	0.0600006	143.333	80.4	-62.9333	1.78275
HTH-type transcriptional regulator ZntR	23	9	16	2	114	32	60	3	1		1		3	4	0	9	0	16	0.0065259	68.6667	5.8	-62.8667	11.8391
Transcriptional regulatory protein NatR	39	24	28	1	193	85	105	1	11	5	3	5	22	42	35	26	103	119	0.062515	127.667	65	-62.6667	1.9641
Competence protein ComM	90	113	168	26	446	400	632	37	138	58	52	17	79	526	405	444	350	426	0.184696	492.667	430.2	-62.4667	1.1452
Glutarate-semialdehyde dehydrogenase DavD	15	18	13	2	74	64	49	3											0	62.3333	0	-62.3333	0
Inner membrane protein YbjJ	11	13	38	6	55	46	143	9	4	1	6		4	15	7	51	0	22	0.0249892	81.3333	19	-62.3333	4.2807
Electron transport complex subunit RsxC	36	25	36	8	178	89	135	11	13	11	3	4	23	50	77	26	82	124	0.0374053	134	71.8	-62.2	1.8663
Phosphate regulon sensor protein PhoR	24	27	19	4	119	96	71	6	7	3	3	4	2	27	21	26	82	11	0.00953176	95.3333	33.4	-61.9333	2.85429
N-acetylneuraminate lyase	32	12	22	6	159	43	83	9	7	8	6		6	27	56	51	0	32	0.035323	95	33.2	-61.8	2.86145
3-hydroxybenzoate synthase	19	18	44	7	94	64	166	10	7	5	7	4	5	27	35	60	82	27	0.0288271	108	46.2	-61.8	2.33766
putative parvulin-type peptidyl-prolyl cis-trans isomerase	8	6	36	1	40	21	135	1	1		1		1	4	0	9	0	5	0.027084	65.3333	3.6	-61.7333	18.1481
Phosphoserine phosphatase	20	36	55	5	99	128	207	7	20	4	11	9	6	76	28	94	185	32	0.108332	144.667	83	-61.6667	1.74297
Peroxiredoxin Bcp	18	21	15	3	89	74	56	4	1	2	2		4	4	14	17	0	22	0.000218396	73	11.4	-61.6	6.40351
Ferrous iron transport protein B	0	52	0	1	0	184	0	1											0	61.3333	0	-61.3333	0
ATP-dependent RNA helicase RhlB	22	29	17	8	109	103	64	11	3	1	1	2	16	11	7	9	41	86	0.0177814	92	30.8	-61.2	2.98701
Carbamoyl-phosphate synthase small chain	71	111	101	28	352	393	380	40	69	43	31	19	65	263	300	265	391	351	0.0636329	375	314	-61	1.19427
Phosphate import ATP-binding protein PstB	16	14	16	4	79	50	60	6					2	0	0	0	0	11	5.78078e-05	63	2.2	-60.8	28.6364
sn-glycerol-3-phosphate transport system permease protein UgpA	39	25	16	4	193	89	60	6	17	5	2	2	20	65	35	17	41	108	0.0718666	114	53.2	-60.8	2.14286
Lactose transport system permease protein LacF	98	80	84	8	486	283	316	11	36	51	11	15	113	137	356	94	308	610	0.329386	361.667	301	-60.6667	1.20155
Carbonic anhydrase	13	8	29	8	64	28	109	11	4	1			2	15	7	0	0	11	0.00691287	67	6.6	-60.4	10.1515
Multidrug resistance protein MdtL	27	10	4	8	134	35	15	11					1	0	0	0	0	5	0.033043	61.3333	1	-60.3333	61.3333
Signal peptidase I W	42	47	32	6	208	166	120	9	12	16	5	8	29	46	112	43	164	157	0.0883215	164.667	104.4	-60.2667	1.57727
Oligopeptide-binding protein AppA	43	38	53	5	213	135	199	7	27	22	9	8	21	103	154	77	164	113	0.0370023	182.333	122.2	-60.1333	1.49209
Germination-specific N-acetylmuramoyl-L-alanine amidase	25	46	32	7	124	163	120	10	14	14	4	6	13	53	98	34	123	70	0.0211938	135.667	75.6	-60.0667	1.79453
Chitinase A	29	9	2	4	144	32	8	6	1				1	4	0	0	0	5	0.0500248	61.3333	1.8	-59.5333	34.0741
Cytochrome c-type biogenesis protein CcmH	24	12	6	6	119	43	23	9					2	0	0	0	0	11	0.0164553	61.6667	2.2	-59.4667	28.0303
Methyl-accepting chemotaxis protein McpP	35	7	0	1	173	25	0	1			2		3	0	0	17	0	16	0.0930528	66	6.6	-59.4	10
Nickel and cobalt resistance protein CnrA	20	10	28	9	99	35	105	13	4	1	5	1	3	15	7	43	21	16	0.0087746	79.6667	20.4	-59.2667	3.90523
Rod shape-determining protein RodA	0	50	0	2	0	177	0	3											0	59	0	-59	0
Anti-sigma F factor antagonist	38	45	37	11	188	159	139	16	24	20	6	5	24	91	140	51	103	130	0.0226014	162	103	-59	1.57282
putative HTH-type transcriptional regulator YahB	33	3	2	8	164	11	8	11					2	0	0	0	0	11	0.0850695	61	2.2	-58.8	27.7273
putative adenylyl-sulfate kinase	10	16	36	7	50	57	135	10	7	5	3		4	27	35	26	0	22	0.0168039	80.6667	22	-58.6667	3.66667
Formate acetyltransferase 1	23	14	9	6	114	50	34	9				1	3	0	0	0	21	16	0.0104919	66	7.4	-58.6	8.91892
Putative acetyltransferase YjbC	10	17	19	1	50	60	71	1	1				1	4	0	0	0	5	7.89959e-06	60.3333	1.8	-58.5333	33.5185
Chromosome partitioning protein ParA	20	15	47	10	99	53	177	14	21	7	8	1	7	80	49	68	21	38	0.0491851	109.667	51.2	-58.4667	2.14193
Peptidase E	20	20	29	6	99	71	109	9	19	7	1		8	72	49	9	0	43	0.0122337	93	34.6	-58.4	2.68786
Exodeoxyribonuclease 7 small subunit	85	107	135	21	421	379	508	30	76	56	36	22	83	290	391	307	452	448	0.157713	436	377.6	-58.4	1.15466
Exo-glucosaminidase LytG	27	52	91	9	134	184	342	13	56	25	23	6	19	213	174	196	123	103	0.160164	220	161.8	-58.2	1.3597
Nitrogenase molybdenum-iron protein beta chain	16	6	48	4	79	21	181	6	1	7	1	3	10	4	49	9	62	54	0.0875288	93.6667	35.6	-58.0667	2.63109
Regulatory protein AsnC	38	87	73	11	188	308	275	16	45	24	28	14	24	171	168	239	288	130	0.127404	257	199.2	-57.8	1.29016
Lactoylglutathione lyase	48	27	40	12	238	96	150	17	23	6	21	6	16	88	42	179	123	86	0.113398	161.333	103.6	-57.7333	1.55727
N5-carboxyaminoimidazole ribonucleotide mutase	76	113	139	39	377	400	523	56	105	54	38	17	79	400	377	325	350	426	0.103141	433.333	375.6	-57.7333	1.15371
Maltoporin	16	17	16	4	79	60	60	6			4		2	0	0	34	0	11	0.000594112	66.3333	9	-57.3333	7.37037
Sulfate adenylyltransferase subunit 1	15	8	45	16	74	28	169	23	6	9	3	1	6	23	63	26	21	32	0.0617813	90.3333	33	-57.3333	2.73737
Multidrug/solvent efflux pump membrane transporter MepB	17	6	20	5	84	21	75	7	1				2	4	0	0	0	11	0.00403281	60	3	-57	20
Autolysin	19	32	32	4	94	113	120	6	30	1	2	2	15	114	7	17	41	81	0.0411531	109	52	-57	2.09615
D-alanine--D-alanine ligase	45	64	80	21	223	227	301	30	45	31	19	8	47	171	216	162	164	254	0.0551043	250.333	193.4	-56.9333	1.29438
Ribosomal protein S12 methylthiotransferase RimO	104	192	195	26	515	680	733	37	146	90	65	29	110	556	628	555	596	594	0.155174	642.667	585.8	-56.8667	1.09708
HTH-type transcriptional regulator NimR	29	9	0	2	144	32	0	3	1				1	4	0	0	0	5	0.0625348	58.6667	1.8	-56.8667	32.5926
Fatty acid oxidation complex subunit alpha	24	10	6	13	119	35	23	19					2	0	0	0	0	11	0.0216588	59	2.2	-56.8	26.8182
Mannosyl-D-glycerate transport/metabolism system repressor MngR	27	14	2	2	134	50	8	3		2			4	0	14	0	0	22	0.043236	64	7.2	-56.8	8.88889
N%2CN'-diacetylchitobiose phosphorylase	20	19	25	3	99	67	94	4	2	5	2	2	9	8	35	17	41	49	0.00196666	86.6667	30	-56.6667	2.88889
Periplasmic beta-glucosidase	0	48	0	0	0	170	0	0											0	56.6667	0	-56.6667	0
3-methyl-2-oxobutanoate hydroxymethyltransferase	36	62	90	14	178	220	339	20	51	22	25	10	33	194	154	214	206	178	0.0938509	245.667	189.2	-56.4667	1.29845
ATP-dependent 6-phosphofructokinase 1	31	42	75	12	154	149	282	17	34	19	23	8	13	130	133	196	164	70	0.115342	195	138.6	-56.4	1.40693
putative MFS-type transporter YhhS	17	10	48	7	84	35	181	10	14	7	5	2	6	53	49	43	41	32	0.0627335	100	43.6	-56.4	2.29358
Sensor histidine kinase CpxA	25	10	8	8	124	35	30	11	1	2			3	4	14	0	0	16	0.0242753	63	6.8	-56.2	9.26471
Peptidyl-prolyl cis-trans isomerase Mip	14	17	24	2	69	60	90	3	7	3	1		5	27	21	9	0	27	0.000556824	73	16.8	-56.2	4.34524
Biotin carboxylase	37	42	40	17	183	149	150	24	23	9	15	4	30	88	63	128	82	162	0.0336077	160.667	104.6	-56.0667	1.53601
Phage shock protein A	13	9	31	2	64	32	117	3	3			1	8	11	0	0	21	43	0.0186675	71	15	-56	4.73333
Mannonate dehydratase	52	37	80	13	258	131	301	19	40	24	21	12	23	152	168	179	247	124	0.135458	230	174	-56	1.32184
Adenylyl-sulfate kinase	19	10	16	8	94	35	60	11	1	1	1		3	4	7	9	0	16	0.00255382	63	7.2	-55.8	8.75
10 kDa chaperonin 1	12	29	35	9	59	103	132	13	12	4	5	3	6	46	28	43	62	32	0.00926742	98	42.2	-55.8	2.32227
Aliphatic amidase expression-regulating protein	8	12	27	4	40	43	102	6	2				4	8	0	0	0	22	0.00625499	61.6667	6	-55.6667	10.2778
tRNA 2-thiocytidine biosynthesis protein TtcA	4	43	2	1	20	152	8	1	3				2	11	0	0	0	11	0.0759432	60	4.4	-55.6	13.6364
ATP-dependent RNA helicase SrmB	27	14	7	11	134	50	26	16	5	2	2		4	19	14	17	0	22	0.0316577	70	14.4	-55.6	4.86111
Hemolysin C	8	32	13	4	40	113	49	6	4	1		1	3	15	7	0	21	16	0.00960837	67.3333	11.8	-55.5333	5.70621
DNA-binding protein Fis	27	8	3	5	134	28	11	7					2	0	0	0	0	11	0.0486405	57.6667	2.2	-55.4667	26.2121
Regulatory protein AtoC	48	30	52	3	238	106	196	4	41	30	9	3	22	156	209	77	62	119	0.135149	180	124.6	-55.4	1.44462
23S rRNA (uracil(1939)-C(5))-methyltransferase RlmD	22	18	29	14	109	64	109	20	6	5	6	2	8	23	35	51	41	43	0.00228944	94	38.6	-55.4	2.43523
Penicillin-binding protein 2	0	47	0	2	0	166	0	3											0	55.3333	0	-55.3333	0
Proton/glutamate-aspartate symporter	75	15	64	5	372	53	241	7	32	17	17	15	26	122	119	145	308	140	0.26452	222	166.8	-55.2	1.33094
Stage IV sporulation protein A	27	44	30	7	134	156	113	10	16	18	6	4	14	61	126	51	82	76	0.0149115	134.333	79.2	-55.1333	1.69613
Putative monooxygenase	17	21	10	4	84	74	38	6	6	1		1		23	7	0	21	0	0.00199632	65.3333	10.2	-55.1333	6.40523
FKBP-type peptidyl-prolyl cis-trans isomerase SlyD	32	56	82	13	159	198	308	19	45	24	21	9	24	171	168	179	185	130	0.0834347	221.667	166.6	-55.0667	1.33053
putative siderophore transport system ATP-binding protein YusV	38	47	60	12	188	166	226	17	38	15	16	7	30	145	105	137	144	162	0.0110677	193.333	138.6	-54.7333	1.3949
FMN reductase [NAD(P)H]	50	67	101	12	248	237	380	17	74	32	25	10	45	282	223	214	206	243	0.100571	288.333	233.6	-54.7333	1.2343
Modification methylase VspI	9	7	45	9	45	25	169	13	10		4	1	6	38	0	34	21	32	0.0802091	79.6667	25	-54.6667	3.18667
N-acetylgalactosamine-N%2CN'-diacetylbacillosaminyl-diphospho-undecaprenol 4-alpha-N-acetylgalactosaminyltransferase	20	29	49	6	99	103	184	9	19	13	10	2	15	72	91	85	41	81	0.0290177	128.667	74	-54.6667	1.73874
Sugar phosphatase YidA	61	56	64	12	302	198	241	17	35	25	24	14	30	133	174	205	288	162	0.119099	247	192.4	-54.6	1.28378
Beta-phosphoglucomutase	25	29	50	7	124	103	188	10	17	5	11	7	15	65	35	94	144	81	0.0614577	138.333	83.8	-54.5333	1.65076
Anaerobic dimethyl sulfoxide reductase chain B	18	29	17	7	89	103	64	10	8		3	4	3	30	0	26	82	16	0.0178168	85.3333	30.8	-54.5333	2.77056
RNA polymerase sigma-G factor	31	44	29	3	154	156	109	4	22	17	7	4	15	84	119	60	82	81	0.00907204	139.667	85.2	-54.4667	1.63928
Peptidoglycan-N-acetylglucosamine deacetylase	53	112	103	16	263	397	387	23	86	34	38	15	51	328	237	325	308	275	0.105984	349	294.6	-54.4	1.18466
Lon protease	47	63	41	15	233	223	154	21	39	24	20	7	21	149	168	171	144	113	0.0274107	203.333	149	-54.3333	1.36465
Rhomboid protease GluP	27	35	58	6	134	124	218	9	17	17	3	6	35	65	119	26	123	189	0.126608	158.667	104.4	-54.2667	1.5198
Regulatory protein Spx	18	25	19	2	89	89	71	3	2	9	1	1	8	8	63	9	21	43	0.00531634	83	28.8	-54.2	2.88194
Antiholin-like protein LrgA	12	41	23	2	59	145	87	3	7		3	6	7	27	0	26	123	38	0.0786909	97	42.8	-54.2	2.26636
DNA topoisomerase 4 subunit B	21	60	27	13	104	213	102	19	12	20	4	2	31	46	140	34	41	167	0.142502	139.667	85.6	-54.0667	1.63162
Mannose-6-phosphate isomerase	29	9	4	4	144	32	15	6			2	1	2	0	0	17	21	11	0.061883	63.6667	9.8	-53.8667	6.4966
3-isopropylmalate dehydratase large subunit	51	49	81	11	253	174	305	16	41	29	17	15	26	156	202	145	308	140	0.162919	244	190.2	-53.8	1.28286
dTDP-4-dehydrorhamnose 3%2C5-epimerase	77	79	155	24	382	280	583	34	103	49	47	14	71	392	342	401	288	383	0.237831	415	361.2	-53.8	1.14895
D-xylose-proton symporter	29	42	70	8	144	149	263	11	42	12	25	5	18	160	84	214	103	97	0.129685	185.333	131.6	-53.7333	1.40831
2-dehydro-3-deoxy-D-gluconate 5-dehydrogenase	23	15	35	10	114	53	132	14	10	6	3	1	19	38	42	26	21	103	0.0436976	99.6667	46	-53.6667	2.16667
L-cystine uptake protein TcyP	20	16	2	3	99	57	8	4					1	0	0	0	0	5	0.0158319	54.6667	1	-53.6667	54.6667
S-adenosylmethionine:tRNA ribosyltransferase-isomerase	112	169	228	37	555	599	858	53	175	94	73	26	112	667	656	623	535	604	0.252625	670.667	617	-53.6667	1.08698
tRNA-dihydrouridine(16) synthase	22	18	13	7	109	64	49	10	5	2	3		8	19	14	26	0	43	0.008109	74	20.4	-53.6	3.62745
N-acetyl-D-glucosamine kinase	21	22	24	4	104	78	90	6	22	9	4		1	84	63	34	0	5	0.0269762	90.6667	37.2	-53.4667	2.43728
RNA polymerase sigma-28 factor	25	46	24	3	124	163	90	4	16	15	5	4	13	61	105	43	82	70	0.0208247	125.667	72.2	-53.4667	1.74054
Methylated-DNA--protein-cysteine methyltransferase%2C constitutive	23	10	24	7	114	35	90	10	11	2	2	1	7	42	14	17	21	38	0.0145911	79.6667	26.4	-53.2667	3.01768
23S rRNA (guanine(745)-N(1))-methyltransferase	29	21	16	4	144	74	60	6		5	2	5	8	0	35	17	103	43	0.064097	92.6667	39.6	-53.0667	2.34007
Penicillin-binding protein activator LpoA	21	15	13	7	104	53	49	10	3	1	4		5	11	7	34	0	27	0.00706773	68.6667	15.8	-52.8667	4.34599
Protein VirD4	22	19	27	7	109	67	102	10	2	11	2	1	14	8	77	17	21	76	0.0277093	92.6667	39.8	-52.8667	2.32831
Aminopyrimidine aminohydrolase	18	22	6	2	89	78	23	3				1	6	0	0	0	21	32	0.0115249	63.3333	10.6	-52.7333	5.97484
Periplasmic serine endoprotease DegP	28	39	60	12	139	138	226	17	21	19	14	6	22	80	133	120	123	119	0.0376191	167.667	115	-52.6667	1.45797
Cytochrome c-type protein TorC	19	12	7	4	94	43	26	6	1				1	4	0	0	0	5	0.00638628	54.3333	1.8	-52.5333	30.1852
2%2C5-diamino-6-ribosylamino-4(3H)-pyrimidinone 5'-phosphate reductase	13	8	33	5	64	28	124	7	2	1	3	2	3	8	7	26	41	16	0.0278401	72	19.6	-52.4	3.67347
Iron-sulfur cluster carrier protein	88	166	125	26	436	588	470	37	135	57	50	23	77	514	398	427	473	416	0.138658	498	445.6	-52.4	1.11759
DegV domain-containing protein	101	112	109	10	500	397	410	14	64	59	25	21	114	244	412	214	432	615	0.309002	435.667	383.4	-52.2667	1.13632
Prolyl endopeptidase	26	22	30	10	129	78	113	14	20	9	7	3	2	76	63	60	62	11	0.0152446	106.667	54.4	-52.2667	1.96078
Formamidopyrimidine-DNA glycosylase	23	30	16	6	114	106	60	9	3	7	7		16	11	49	60	0	86	0.0385206	93.3333	41.2	-52.1333	2.26537
Malonyl-[acyl-carrier protein] O-methyltransferase	13	33	13	4	64	117	49	6	4	6	4		6	15	42	34	0	32	0.0141649	76.6667	24.6	-52.0667	3.11653
Methionine synthase	87	115	186	25	431	407	700	36	98	63	52	28	87	373	440	444	576	470	0.273235	512.667	460.6	-52.0667	1.11304
ATP-dependent helicase/deoxyribonuclease subunit B	72	101	131	14	357	358	493	20	89	60	38	14	71	339	419	325	288	383	0.145961	402.667	350.8	-51.8667	1.14785
Glycerol-3-phosphate dehydrogenase [NAD(P)+]	83	104	118	17	411	368	444	24	77	52	37	18	81	293	363	316	370	437	0.104476	407.667	355.8	-51.8667	1.14577
ABC transporter ATP-binding protein uup	20	23	13	4	99	81	49	6	1	3	4	1	8	4	21	34	21	43	0.00484742	76.3333	24.6	-51.7333	3.10298
Low conductance mechanosensitive channel YnaI	22	24	10	2	109	85	38	3	7	3	2	2	4	27	21	17	41	22	0.00939951	77.3333	25.6	-51.7333	3.02083
Chorismate synthase	81	118	160	24	401	418	602	34	112	61	44	20	87	427	426	376	411	470	0.175705	473.667	422	-51.6667	1.12243
Mannosylglycerate hydrolase	33	22	16	8	164	78	60	11	16	17			12	61	119	0	0	65	0.11163	100.667	49	-51.6667	2.05442
Electron transport complex subunit RsxA	64	110	116	24	317	390	436	34	101	58	31	12	64	385	405	265	247	345	0.167162	381	329.4	-51.6	1.15665
Aspartate carbamoyltransferase	46	47	62	13	228	166	233	19	50	27	17	5	30	190	188	145	103	162	0.0504087	209	157.6	-51.4	1.32614
C4-dicarboxylate TRAP transporter large permease protein DctM	86	37	78	9	426	131	293	13	92	24	29	11	31	351	168	248	226	167	0.264476	283.333	232	-51.3333	1.22126
Glutamate formimidoyltransferase	23	42	31	6	114	149	117	9	35	12	7	2	11	133	84	60	41	59	0.0326623	126.667	75.4	-51.2667	1.67993
Ribosomal RNA small subunit methyltransferase F	56	80	97	13	277	283	365	19	53	47	23	12	58	202	328	196	247	313	0.134635	308.333	257.2	-51.1333	1.19881
Modulator of FtsH protease HflK	24	47	14	14	119	166	53	20	16	10	4	3	15	61	70	34	62	81	0.0489953	112.667	61.6	-51.0667	1.829
Homoserine O-succinyltransferase	10	31	1	1	50	110	4	1		1			2	0	7	0	0	11	0.032378	54.6667	3.6	-51.0667	15.1852
Biotin carboxyl carrier protein of acetyl-CoA carboxylase	39	53	54	14	193	188	203	20	30	12	14	10	36	114	84	120	206	194	0.0809409	194.667	143.6	-51.0667	1.35562
Glutathione-regulated potassium-efflux system protein KefC	21	11	9	8	104	39	34	11	2	1	1		3	8	7	9	0	16	0.0114982	59	8	-51	7.375
Thiol:disulfide interchange protein DsbA	26	11	3	6	129	39	11	9		1	3		2	0	7	26	0	11	0.0530692	59.6667	8.8	-50.8667	6.7803
Cold shock-like protein CspG	11	23	6	1	55	81	23	1					2	0	0	0	0	11	0.00342784	53	2.2	-50.8	24.0909
Ribosomal small subunit pseudouridine synthase A	43	49	35	12	213	174	132	17	15	13	8	10	35	57	91	68	206	189	0.151736	173	122.2	-50.8	1.41571
Spore protein YabP	23	31	26	3	114	110	98	4	18	11	3	2	13	69	77	26	41	70	0.00479968	107.333	56.6	-50.7333	1.89635
Deoxyribodipyrimidine photo-lyase	11	25	3	13	55	89	11	19					1	0	0	0	0	5	0.0110728	51.6667	1	-50.6667	51.6667
Cytochrome c551 peroxidase	24	11	9	6	119	39	34	9	11	2			2	42	14	0	0	11	0.0331077	64	13.4	-50.6	4.77612
Transcription antitermination protein RfaH	36	13	48	13	178	46	181	19	28	10	9	4	16	107	70	77	82	86	0.0911474	135	84.4	-50.6	1.59953
2-amino-3-ketobutyrate coenzyme A ligase	31	42	45	12	154	149	169	17	51	20	11	2	12	194	140	94	41	65	0.108924	157.333	106.8	-50.5333	1.47316
Hydroxyacylglutathione hydrolase	32	29	26	12	159	103	98	17	9	8	2	7	18	34	56	17	144	97	0.0928684	120	69.6	-50.4	1.72414
C-factor	20	11	4	6	99	39	15	9	1					4	0	0	0	0	0.0167104	51	0.8	-50.2	63.75
HTH-type transcriptional regulator MlrA	4	15	27	5	20	53	102	7	7		1		1	27	0	9	0	5	0.0179929	58.3333	8.2	-50.1333	7.11382
Cysteine/O-acetylserine efflux protein	26	7	19	1	129	25	71	1	10	5	1	1	4	38	35	9	21	22	0.0366158	75	25	-50	3
DNA topoisomerase 4 subunit A	22	20	23	12	109	71	87	17	2	9	5		15	8	63	43	0	81	0.0328157	89	39	-50	2.28205
Non-canonical purine NTP pyrophosphatase	0	42	0	1	0	149	0	1											0	49.6667	0	-49.6667	0
DNA-invertase hin	44	27	41	8	218	96	154	11	22	18	26	2	11	84	126	222	41	59	0.180132	156	106.4	-49.6	1.46617
DNA translocase SftA	16	27	27	4	79	96	102	6	7	14	6		7	27	98	51	0	38	0.0331953	92.3333	42.8	-49.5333	2.15732
Spore germination protein A1	22	11	13	5	109	39	49	7	2	3	1	1	4	8	21	9	21	22	0.0120556	65.6667	16.2	-49.4667	4.0535
Ribose operon repressor	24	19	15	3	119	67	56	4	3	4	3	1	13	11	28	26	21	70	0.0225066	80.6667	31.2	-49.4667	2.58547
Cation efflux system protein CusC	14	11	50	9	69	39	188	13	19	9	5	2	5	72	63	43	41	27	0.103267	98.6667	49.2	-49.4667	2.00542
Modification methylase HaeIII	49	40	51	10	243	142	192	14	40	28	13	7	21	152	195	111	144	113	0.0729203	192.333	143	-49.3333	1.34499
Nudix hydrolase	9	14	30	5	45	50	113	7	7	3		2	2	27	21	0	41	11	0.0185473	69.3333	20	-49.3333	3.46667
Iron-sulfur cluster repair protein YtfE	16	7	27	9	79	25	102	13	4	3	1	2	2	15	21	9	41	11	0.0181829	68.6667	19.4	-49.2667	3.53952
Ferrochelatase	20	11	6	4	99	39	23	6	3				2	11	0	0	0	11	0.0145429	53.6667	4.4	-49.2667	12.197
DNA-binding protein H-NS	28	3	3	6	139	11	11	9			2		1	0	0	17	0	5	0.0842369	53.6667	4.4	-49.2667	12.197
Thymidine kinase	38	87	48	10	188	308	181	14	59	29	21	4	36	225	202	179	82	194	0.156113	225.667	176.4	-49.2667	1.27929
HTH-type transcriptional regulator GalR	21	13	4	3	104	46	15	4		1	2		1	0	7	17	0	5	0.0225405	55	5.8	-49.2	9.48276
Sialic acid-binding periplasmic protein SiaP	17	9	59	2	84	32	222	3	29	8	5	4	5	110	56	43	82	27	0.162594	112.667	63.6	-49.0667	1.77149
Fructose-1%2C6-bisphosphatase 1 class 2	18	13	4	6	89	46	15	9					1	0	0	0	0	5	0.0103454	50	1	-49	50
Glycerate dehydrogenase	28	41	50	2	139	145	188	3	28	16	13	4	24	107	112	111	82	130	0.00918058	157.333	108.4	-48.9333	1.45141
Multiple sugar-binding protein	33	33	22	3	164	117	83	4	16	13	5	1	27	61	91	43	21	146	0.0978291	121.333	72.4	-48.9333	1.67587
Anthranilate synthase component 2	25	28	25	9	124	99	94	13	13	7	7	4	8	50	49	60	82	43	0.00257346	105.667	56.8	-48.8667	1.86033
DNA translocase FtsK	46	53	44	8	228	188	166	11	42	26	13	6	28	160	181	111	123	151	0.0315816	194	145.2	-48.8	1.33609
3-chloro-4-hydroxyphenylacetate reductive dehalogenase	8	14	15	0	40	50	56	0											0	48.6667	0	-48.6667	0
CsgBAC operon transcriptional regulatory protein	25	6	2	3	124	21	8	4		1			1	0	7	0	0	5	0.060252	51	2.4	-48.6	21.25
Cysteine desulfuration protein SufE	31	57	78	13	154	202	293	19	57	20	24	8	21	217	140	205	164	113	0.13266	216.333	167.8	-48.5333	1.28923
Phospho-2-dehydro-3-deoxyheptonate aldolase	72	106	120	12	357	375	451	17	96	39	50	16	62	366	272	427	329	335	0.134249	394.333	345.8	-48.5333	1.14035
Cobalt-zinc-cadmium resistance protein CzcA	41	38	55	10	203	135	207	14	50	21	17	5	15	190	147	145	103	81	0.081591	181.667	133.2	-48.4667	1.36386
Spore maturation protein A	40	60	43	9	198	213	162	13	20	22	16	10	26	76	154	137	206	140	0.0777923	191	142.6	-48.4	1.33941
Stringent starvation protein A	21	7	5	7	104	25	19	10					1	0	0	0	0	5	0.0262463	49.3333	1	-48.3333	49.3333
4-hydroxythreonine-4-phosphate dehydrogenase	17	18	13	7	84	64	49	10	3	1	3		8	11	7	26	0	43	0.00439019	65.6667	17.4	-48.2667	3.77395
DNA protection during starvation protein	7	27	5	0	35	96	19	0	1				1	4	0	0	0	5	0.0155222	50	1.8	-48.2	27.7778
Sulfur carrier protein ThiS	24	23	34	11	119	81	128	16	8	7	4	7	9	30	49	34	144	49	0.0797513	109.333	61.2	-48.1333	1.78649
Lipoprotein-releasing system ATP-binding protein LolD	82	104	119	29	406	368	448	41	80	51	31	26	62	305	356	265	535	335	0.241213	407.333	359.2	-48.1333	1.134
HTH-type transcriptional repressor YtrA	94	84	75	7	466	298	282	10	65	47	25	15	75	248	328	214	308	405	0.232589	348.667	300.6	-48.0667	1.1599
Chaperone protein TorD	21	8	4	5	104	28	15	7					1	0	0	0	0	5	0.0280267	49	1	-48	49
ATP-dependent Clp protease ATP-binding subunit ClpE	10	10	36	4	50	35	135	6	6	5	3	1	4	23	35	26	21	22	0.0410822	73.3333	25.4	-47.9333	2.88714
DNA damage-inducible protein F	47	27	91	17	233	96	342	24	47	20	22	11	27	179	140	188	226	146	0.212614	223.667	175.8	-47.8667	1.27228
Exodeoxyribonuclease 7 large subunit	90	120	155	23	446	425	583	33	95	65	42	26	88	362	454	359	535	475	0.221084	484.667	437	-47.6667	1.10908
Pyruvate dehydrogenase complex repressor	31	7	4	7	154	25	15	10	2	2		2	4	8	14	0	41	22	0.105209	64.6667	17	-47.6667	3.80392
HTH-type transcriptional repressor YvoA	31	18	5	6	154	64	19	9	2	11	1	2	4	8	77	9	41	22	0.103627	79	31.4	-47.6	2.51592
HTH-type transcriptional repressor CytR	48	40	51	10	238	142	192	14	22	13	13	12	34	84	91	111	247	183	0.172955	190.667	143.2	-47.4667	1.33147
FeS cluster assembly protein SufD	33	67	88	14	164	237	331	20	63	27	20	10	33	240	188	171	206	178	0.134644	244	196.6	-47.4	1.2411
PTS system glucose-specific EIICB component	20	12	5	4	99	43	19	6		1	1		3	0	7	9	0	16	0.0187588	53.6667	6.4	-47.2667	8.38542
Lipid A export ATP-binding/permease protein MsbA	73	64	70	26	362	227	263	37	81	40	22	7	49	309	279	188	144	264	0.192283	284	236.8	-47.2	1.19932
Sporulation kinase D	22	33	40	6	109	117	150	9	28	3	4	8	12	107	21	34	164	65	0.118856	125.333	78.2	-47.1333	1.60273
Type II secretion system protein C	16	11	6	10	79	39	23	14											0	47	0	-47	0
Nucleoid occlusion protein	37	42	30	5	183	149	113	7	29	10	12	7	15	110	70	102	144	81	0.0415134	148.333	101.4	-46.9333	1.46285
Cytochrome c-552	25	10	41	10	124	35	154	14	14	4	13	2	10	53	28	111	41	54	0.0978916	104.333	57.4	-46.9333	1.81765
Asp/Glu-specific dipeptidyl-peptidase	14	32	25	3	69	113	94	4	24	11	3		6	91	77	26	0	32	0.0514759	92	45.2	-46.8	2.0354
Putative ribosome biogenesis GTPase RsgA	0	52	0	5	0	184	0	7	1		2	2	2	4	0	17	41	11	0.173521	61.3333	14.6	-46.7333	4.20091
Glyceraldehyde-3-phosphate dehydrogenase A	25	47	31	11	124	166	117	16	36	13	10	3	13	137	91	85	62	70	0.0325028	135.667	89	-46.6667	1.52434
3-deoxy-D-manno-octulosonate 8-phosphate phosphatase KdsC	55	67	118	23	273	237	444	33	84	36	40	9	48	320	251	342	185	259	0.23169	318	271.4	-46.6	1.1717
Hypoxanthine phosphoribosyltransferase	54	61	85	19	268	216	320	27	57	28	25	10	51	217	195	214	206	275	0.0779962	268	221.4	-46.6	1.21048
Ribosomal protein L11 methyltransferase	83	105	153	32	411	372	575	46	95	59	44	24	72	362	412	376	493	389	0.215936	452.667	406.4	-46.2667	1.11385
Acetyl-CoA acetyltransferase	42	23	19	17	208	81	71	24	22	12	1	2	28	84	84	9	41	151	0.17368	120	73.8	-46.2	1.62602
Phosphoadenosine phosphosulfate reductase	17	19	12	3	84	67	45	4	6	2	5		3	23	14	43	0	16	0.00506008	65.3333	19.2	-46.1333	3.40278
Modification methylase FokI	25	26	42	5	124	92	158	7	21	9	10	3	19	80	63	85	62	103	0.018385	124.667	78.6	-46.0667	1.58609
Mannitol-specific phosphotransferase enzyme IIA component	18	2	14	3	89	7	53	4		1			2	0	7	0	0	11	0.0198522	49.6667	3.6	-46.0667	13.7963
Protein mlc	25	5	6	2	124	18	23	3		2	1		4	0	14	9	0	22	0.0626549	55	9	-46	6.11111
Colicin I receptor	59	58	127	21	292	205	478	30	71	45	43	15	25	271	314	367	308	135	0.289865	325	279	-46	1.16487
Putative signal peptide peptidase SppA	11	24	19	3	55	85	71	4	11	6			7	42	42	0	0	38	0.0103554	70.3333	24.4	-45.9333	2.88251
Aminopeptidase 2	18	36	31	3	89	128	117	4	7	17	5	3	14	27	119	43	62	76	0.0445693	111.333	65.4	-45.9333	1.70234
4-hydroxybenzoate solanesyltransferase	7	7	22	1	35	25	83	1	1				1	4	0	0	0	5	0.00652268	47.6667	1.8	-45.8667	26.4815
putative DNA endonuclease SmrA	15	10	11	6	74	35	41	9		1	1		1	0	7	9	0	5	0.00124195	50	4.2	-45.8	11.9048
ATP-dependent DNA helicase RecQ	106	164	168	39	525	581	632	56	165	71	61	29	79	629	496	521	596	426	0.211613	579.333	533.6	-45.7333	1.08571
Thioredoxin-dependent 5'-adenylylsulfate reductase	14	7	36	9	69	25	135	13	6	6	6	1	3	23	42	51	21	16	0.058639	76.3333	30.6	-45.7333	2.49455
Urease subunit beta	10	3	22	1	50	11	83	1		1			1	0	7	0	0	5	0.0123995	48	2.4	-45.6	20
Pantothenic acid transporter PanT	24	29	10	4	119	103	38	6	6	11	2	3	5	23	77	17	62	27	0.0538581	86.6667	41.2	-45.4667	2.10356
Succinate dehydrogenase flavoprotein subunit	19	11	5	10	94	39	19	14				1	1	0	0	0	21	5	0.019379	50.6667	5.2	-45.4667	9.74359
Tyrosine-protein phosphatase YwqE	28	41	29	5	139	145	109	7	28	16	9	3	13	107	112	77	62	70	0.0138175	131	85.6	-45.4	1.53037
Multidrug export protein EmrB	15	21	5	3	74	74	19	4	3		1	1	2	11	0	9	21	11	0.00920589	55.6667	10.4	-45.2667	5.35256
Cell division protein DamX	24	8	5	10	119	28	19	14		2	3		2	0	14	26	0	11	0.0557781	55.3333	10.2	-45.1333	5.42484
K(+)/H(+) antiporter NhaP2	21	18	37	1	104	64	139	1	30	13	5		7	114	91	43	0	38	0.0997545	102.333	57.2	-45.1333	1.78904
Metalloprotease TldD	41	46	22	15	203	163	83	21	26	19	13	3	22	99	133	111	62	119	0.0949462	149.667	104.8	-44.8667	1.42812
Adenine deaminase	49	36	71	8	243	128	267	11	50	20	21	10	23	190	140	179	206	124	0.138252	212.667	167.8	-44.8667	1.26738
Na(+)-translocating NADH-quinone reductase subunit B	39	56	62	19	193	198	233	27	51	26	24	6	21	194	181	205	123	113	0.0730067	208	163.2	-44.8	1.27451
Inosine-guanosine kinase	21	7	5	8	104	25	19	11		1			3	0	7	0	0	16	0.0356064	49.3333	4.6	-44.7333	10.7246
Deoxyribose-phosphate aldolase 2	16	10	13	1	79	35	49	1	1	4			3	4	28	0	0	16	0.00478778	54.3333	9.6	-44.7333	5.65972
Dextranase	3	4	28	1	15	14	105	1											0	44.6667	0	-44.6667	0
Na(+)/H(+) antiporter ApNhaP	3	6	26	4	15	21	98	6											0	44.6667	0	-44.6667	0
DNA transformation protein TfoX1	19	7	4	3	94	25	15	4											0	44.6667	0	-44.6667	0
Pectin degradation repressor protein KdgR	16	6	14	1	79	21	53	1	1	1		1		4	7	0	21	0	0.00767093	51	6.4	-44.6	7.96875
PTS system maltose-specific EIICB component	24	17	4	2	119	60	15	3	9		6		3	34	0	51	0	16	0.0669727	64.6667	20.2	-44.4667	3.20132
Outer membrane protein TolC	56	61	70	21	277	216	263	30	61	25	34	9	29	232	174	290	185	157	0.124607	252	207.6	-44.4	1.21387
Dimethyl sulfoxide reductase DmsA	10	18	16	4	50	64	60	6	6		4		2	23	0	34	0	11	0.00158821	58	13.6	-44.4	4.26471
Hydrogen cyanide synthase subunit HcnB	13	28	15	1	64	99	56	1	4	10	1		9	15	70	9	0	49	0.034831	73	28.6	-44.4	2.55245
UDP-N-acetylmuramoyl-L-alanyl-D-glutamate--2%2C6-diaminopimelate ligase	96	139	176	24	476	492	662	34	132	68	52	27	96	503	475	444	555	518	0.205629	543.333	499	-44.3333	1.08884
Malonyl CoA-acyl carrier protein transacylase	67	97	133	22	332	344	500	31	101	42	44	16	66	385	293	376	329	356	0.183852	392	347.8	-44.2	1.12708
Peptidyl-prolyl cis-trans isomerase D	15	26	16	6	74	92	60	9	4	5	5	1	8	15	35	43	21	43	0.00254384	75.3333	31.4	-43.9333	2.39915
ATP-dependent DNA helicase Rep	19	22	13	10	94	78	49	14	5	1	7	2	4	19	7	60	41	22	0.0157302	73.6667	29.8	-43.8667	2.47204
ATP-dependent dethiobiotin synthetase BioD 1	17	31	25	4	84	110	94	6	14	3	7	3	12	53	21	60	62	65	0.00548912	96	52.2	-43.8	1.83908
putative amino-acid metabolite efflux pump	20	23	41	7	99	81	154	10	11	5	8	6	13	42	35	68	123	70	0.0726595	111.333	67.6	-43.7333	1.64694
putative multidrug resistance ABC transporter ATP-binding/permease protein YheI	14	29	37	6	69	103	139	9	10	16	2	2	17	38	112	17	41	92	0.0854853	103.667	60	-43.6667	1.72778
Sensor histidine kinase YehU	0	37	0	2	0	131	0	3											0	43.6667	0	-43.6667	0
Putative lipid II flippase FtsW	0	42	1	3	0	149	4	4	3	3			1	11	21	0	0	5	0.136777	51	7.4	-43.6	6.89189
putative HTH-type transcriptional regulator YurK	20	2	8	0	99	7	30	0	1				1	4	0	0	0	5	0.0375187	45.3333	1.8	-43.5333	25.1852
PTS system N-acetylglucosamine-specific EIICBA component	28	3	9	3	139	11	34	4	8	2	4		2	30	14	34	0	11	0.0982473	61.3333	17.8	-43.5333	3.44569
putative phospholipid ABC transporter permease protein MlaE	60	66	97	19	297	234	365	27	61	36	37	13	39	232	251	316	267	210	0.139567	298.667	255.2	-43.4667	1.17032
Ribosomal RNA large subunit methyltransferase M	13	15	6	4	64	53	23	6					3	0	0	0	0	16	0.00232176	46.6667	3.2	-43.4667	14.5833
UDP-N-acetyl-D-glucosamine 6-dehydrogenase	20	53	35	3	99	188	132	4	43	16	6	3	17	164	112	51	62	92	0.116855	139.667	96.2	-43.4667	1.45184
Oxidoreductase YdhF	22	18	13	5	109	64	49	7	4	8	4	1	5	15	56	34	21	27	0.0183226	74	30.6	-43.4	2.4183
Protein YnjB	17	10	3	4	84	35	11	6											0	43.3333	0	-43.3333	0
Xyloglucanase Xgh74A	3	5	33	3	15	18	124	4	1	3	1		2	4	21	9	0	11	0.0772387	52.3333	9	-43.3333	5.81481
Ditrans%2Cpolycis-undecaprenyl-diphosphate synthase ((2E%2C6E)-farnesyl-diphosphate specific)	58	97	112	19	287	344	421	27	83	42	42	13	56	316	293	359	267	302	0.130269	350.667	307.4	-43.2667	1.14075
Stage III sporulation protein D	21	36	25	5	104	128	94	7	18	15	3	3	12	69	105	26	62	65	0.0278377	108.667	65.4	-43.2667	1.66157
Plasmid partition protein A	18	6	5	6	89	21	19	9											0	43	0	-43	0
Coniferyl aldehyde dehydrogenase	24	9	3	4	119	32	11	6	4	1	2		3	15	7	17	0	16	0.0651095	54	11	-43	4.90909
Sensor histidine kinase CssS	14	19	19	3	69	67	71	4	2	4		3	6	8	28	0	62	32	0.0123348	69	26	-43	2.65385
Type-1 restriction enzyme R protein	42	69	44	11	208	244	166	16	47	22	41	2	17	179	154	350	41	92	0.2869	206	163.2	-42.8	1.26225
Cold shock-like protein CspD	17	11	4	3	84	39	15	4					3	0	0	0	0	16	0.0159132	46	3.2	-42.8	14.375
Putative teichuronic acid biosynthesis glycosyltransferase TuaH	15	9	11	1	74	32	41	1	1	1	1		2	4	7	9	0	11	0.00222509	49	6.2	-42.8	7.90323
Glutathione-binding protein GsiB	21	9	22	6	104	32	83	9	14	2	1	1	10	53	14	9	21	54	0.0396355	73	30.2	-42.8	2.41722
tRNA (cytidine/uridine-2'-O-)-methyltransferase TrmJ	13	17	4	3	64	60	15	4		1			2	0	7	0	0	11	0.00568851	46.3333	3.6	-42.7333	12.8704
Modification methylase HpaII	19	22	32	7	94	78	120	10	24	7	5	2	9	91	49	43	41	49	0.0154226	97.3333	54.6	-42.7333	1.78266
Stage 0 sporulation protein J	44	44	98	20	218	156	369	28	45	40	21	8	43	171	279	179	164	232	0.232711	247.667	205	-42.6667	1.20813
L-serine dehydratase 1	23	28	9	6	114	99	34	9	5	6	7	3	3	19	42	60	62	16	0.0516403	82.3333	39.8	-42.5333	2.06868
Selenide%2C water dikinase	17	36	18	4	84	128	68	6	13	7	4	3	11	50	49	34	62	59	0.0135549	93.3333	50.8	-42.5333	1.83727
Inner membrane ABC transporter permease protein YdcV	49	71	54	15	243	251	203	21	45	32	23	7	40	171	223	196	144	216	0.0532831	232.333	190	-42.3333	1.22281
Beta-agarase C	3	7	23	2	15	25	87	3											0	42.3333	0	-42.3333	0
putative D-lyxose ketol-isomerase	9	4	18	4	45	14	68	6											0	42.3333	0	-42.3333	0
Alkaline phosphatase 3	23	8	17	2	114	28	64	3	10	8	2		4	38	56	17	0	22	0.0534799	68.6667	26.6	-42.0667	2.58145
Transcriptional regulatory protein CpxR	18	9	5	8	89	32	19	11		1			3	0	7	0	0	16	0.0206555	46.6667	4.6	-42.0667	10.1449
putative glutamate/gamma-aminobutyrate antiporter	8	17	7	1	40	60	26	1											0	42	0	-42	0
Putative SPBc2 prophage-derived single-strand DNA-specific exonuclease YorK	2	35	5	0	10	124	19	0		2	1		4	0	14	9	0	22	0.0874882	51	9	-42	5.66667
Aminodeoxychorismate synthase component 2	33	17	41	7	164	60	154	10	24	11	13	4	11	91	77	111	82	59	0.0836106	126	84	-42	1.5
NADH peroxidase	13	12	12	5	64	43	45	7	2	2			4	8	14	0	0	22	0.000681036	50.6667	8.8	-41.8667	5.75758
Anaerobic dimethyl sulfoxide reductase chain C	12	11	9	2	59	39	34	3					2	0	0	0	0	11	0.000283211	44	2.2	-41.8	20
3-deoxy-D-manno-octulosonic acid kinase	16	7	13	13	79	25	49	19	3	1	2		2	11	7	17	0	11	0.00655147	51	9.2	-41.8	5.54348
putative ABC transporter permease protein	25	15	37	7	124	53	139	10	21	14	4	2	12	80	98	34	41	65	0.0734115	105.333	63.6	-41.7333	1.65618
Cytochrome c-554(548)	18	8	2	4	89	28	8	6											0	41.6667	0	-41.6667	0
ATP-dependent protease ATPase subunit HslU	19	10	14	6	94	35	53	9	8	3	2		5	30	21	17	0	27	0.0143429	60.6667	19	-41.6667	3.19298
3-[(3aS%2C4S%2C7aS)-7a-methyl-1%2C5-dioxo-octahydro-1H-inden-4-yl]propanoyl:CoA ligase	17	32	51	9	84	113	192	13	24	11	15	2	19	91	77	128	41	103	0.109933	129.667	88	-41.6667	1.47348
Zinc-type alcohol dehydrogenase-like protein	14	14	2	1	69	50	8	1					1	0	0	0	0	5	0.0102327	42.3333	1	-41.3333	42.3333
Electron transport complex subunit RsxE	15	9	8	5	74	32	30	7	1				3	4	0	0	0	16	0.00522453	45.3333	4	-41.3333	11.3333
Hemin import ATP-binding protein HmuV	18	11	7	6	89	39	26	9		1		1	4	0	7	0	21	22	0.0183984	51.3333	10	-41.3333	5.13333
N-formyl-4-amino-5-aminomethyl-2-methylpyrimidine deformylase	10	14	24	3	50	50	90	4	13	5	1		3	50	35	9	0	16	0.0186675	63.3333	22	-41.3333	2.87879
Anaerobic sulfite reductase subunit A	21	16	10	5	104	57	38	7	1	3		3	7	4	21	0	62	38	0.047859	66.3333	25	-41.3333	2.65333
Lichenan permease IIC component	36	18	2	6	178	64	8	9	9	1	14		9	34	7	120	0	49	0.203557	83.3333	42	-41.3333	1.98413
Melibiose carrier protein	32	28	22	8	159	99	83	11	19	7	6	4	20	72	49	51	82	108	0.0566107	113.667	72.4	-41.2667	1.56998
Chromosome-partitioning ATPase Soj	9	16	16	3	45	57	60	4	3	2	2		4	11	14	17	0	22	0.000222333	54	12.8	-41.2	4.21875
Methyl-accepting chemotaxis protein II	5	12	26	0	25	43	98	0	2	2			9	8	14	0	0	49	0.0433392	55.3333	14.2	-41.1333	3.89671
D-alanyl-D-alanine carboxypeptidase DacA	21	17	8	4	104	60	30	6	5		3	3	2	19	0	26	62	11	0.0495068	64.6667	23.6	-41.0667	2.74011
Dihydrolipoyllysine-residue succinyltransferase component of 2-oxoglutarate dehydrogenase complex	18	8	4	7	89	28	15	10	2	1				8	7	0	0	0	0.0254145	44	3	-41	14.6667
Flagellin D	28	6	2	1	139	21	8	1	1	1	3		7	4	7	26	0	38	0.123313	56	15	-41	3.73333
Transcriptional regulator DauR	22	12	5	2	109	43	19	3	2	1	5		4	8	7	43	0	22	0.0566895	57	16	-41	3.5625
tRNA sulfurtransferase	13	13	9	5	64	46	34	7		2	2		1	0	14	17	0	5	0.00106031	48	7.2	-40.8	6.66667
Aconitate hydratase B	12	14	8	6	59	50	30	9			2		2	0	0	17	0	11	0.00102054	46.3333	5.6	-40.7333	8.27381
RNA polymerase sigma factor RpoH	17	20	14	6	84	71	53	9	5	5	6		7	19	35	51	0	38	0.0114685	69.3333	28.6	-40.7333	2.42424
Transcriptional activator CadC	23	2	1	3	114	7	4	4					1	0	0	0	0	5	0.087569	41.6667	1	-40.6667	41.6667
D-lyxose ketol-isomerase	7	6	21	2	35	21	79	3	3				2	11	0	0	0	11	0.0110769	45	4.4	-40.6	10.2273
Na(+)/H(+)-K(+) antiporter GerN	31	87	71	8	154	308	267	11	57	22	24	11	39	217	154	205	226	210	0.16082	243	202.4	-40.6	1.20059
Choloylglycine hydrolase	8	29	14	3	40	103	53	4	3	2	3	2	6	11	14	26	41	32	0.0216532	65.3333	24.8	-40.5333	2.63441
Transposon Tn3 resolvase	8	25	14	2	40	89	53	3	3	6	2		6	11	42	17	0	32	0.0165688	60.6667	20.4	-40.2667	2.97386
Cellulosome-anchoring protein	15	12	18	6	74	43	68	9	8	1		1	9	30	7	0	21	49	0.0121777	61.6667	21.4	-40.2667	2.88162
Trehalose transport system permease protein SugB	26	22	34	2	129	78	128	3	14	13	8	1	23	53	91	68	21	124	0.0878466	111.667	71.4	-40.2667	1.56396
Actin cross-linking toxin VgrG1	30	2	8	3	149	7	30	4	3	3	1	2	5	11	21	9	41	27	0.134821	62	21.8	-40.2	2.84404
putative membrane transporter protein YfcA	45	16	18	3	223	57	68	4	20	9	11	5	8	76	63	94	103	43	0.186029	116	75.8	-40.2	1.53034
2-isopropylmalate synthase	86	117	190	22	426	414	715	31	110	65	56	28	86	419	454	478	576	464	0.316824	518.333	478.2	-40.1333	1.08393
Spore germination protein B1	18	28	31	3	89	99	117	4	15	12	3	4	11	57	84	26	82	59	0.0195939	101.667	61.6	-40.0667	1.65043
Protein	20	11	10	2	99	39	38	3	2	4	1	1	5	8	28	9	21	27	0.0221829	58.6667	18.6	-40.0667	3.15412
Insertion sequence putative ATP-binding protein	0	34	0	1	0	120	0	1											0	40	0	-40	0
Glutaredoxin arsenate reductase	4	24	4	2	20	85	15	3											0	40	0	-40	0
Acyl-coenzyme A dehydrogenase	19	4	4	3	94	14	15	4					1	0	0	0	0	5	0.0424184	41	1	-40	41
N-acetylneuraminate epimerase	14	19	15	28	69	67	56	40	7	4	5		4	27	28	43	0	22	0.00313239	64	24	-40	2.66667
DNA primase TraC	23	20	11	2	114	71	41	3	20	3	5		7	76	21	43	0	38	0.0662493	75.3333	35.6	-39.7333	2.1161
Glycerol dehydrogenase	15	18	14	7	74	64	53	10	3	2	3	1	9	11	14	26	21	49	0.00380206	63.6667	24.2	-39.4667	2.63085
putative HTH-type transcriptional regulator YbbH	24	14	9	1	119	50	34	1		1	12		6	0	7	102	0	32	0.132357	67.6667	28.2	-39.4667	2.39953
Teichuronic acid biosynthesis protein TuaB	23	52	55	7	114	184	207	10	39	18	17	7	15	149	126	145	144	81	0.0939701	168.333	129	-39.3333	1.30491
Elongation factor P--(R)-beta-lysine ligase	12	21	4	5	59	74	15	7		1		1	4	0	7	0	21	22	0.0173497	49.3333	10	-39.3333	4.93333
Citrate synthase	30	27	16	6	149	96	60	9	11	5	7	3	21	42	35	60	62	113	0.092537	101.667	62.4	-39.2667	1.62927
Thiosulfate sulfurtransferase GlpE	18	12	3	7	89	43	11	10	5	1			3	19	7	0	0	16	0.0321523	47.6667	8.4	-39.2667	5.6746
ATP-dependent protease subunit HslV	20	30	19	9	99	106	71	13	20	9	7		12	76	63	60	0	65	0.0461391	92	52.8	-39.2	1.74242
5'-nucleotidase SurE	42	76	106	6	208	269	399	9	73	43	27	9	50	278	300	231	185	270	0.228108	292	252.8	-39.2	1.15506
HTH-type transcriptional regulator SgrR	20	4	3	1	99	14	11	1					2	0	0	0	0	11	0.0576995	41.3333	2.2	-39.1333	18.7879
Glc operon transcriptional activator	13	7	11	2	64	25	41	3				1		0	0	0	21	0	0.00390327	43.3333	4.2	-39.1333	10.3175
Transcriptional regulatory protein OmpR	23	15	11	4	114	53	41	6	9	2	1	3	6	34	14	9	62	32	0.0535687	69.3333	30.2	-39.1333	2.29581
Molybdopterin-synthase adenylyltransferase	19	22	16	6	94	78	60	9	4	4	4	5	2	15	28	34	103	11	0.0729781	77.3333	38.2	-39.1333	2.02443
DNA recombination protein RmuC	0	33	0	2	0	117	0	3											0	39	0	-39	0
Iron-uptake system permease protein FeuB	10	7	12	7	50	25	45	10					1	0	0	0	0	5	0.000247601	40	1	-39	40
Pesticidal crystal protein Cry22Aa	4	25	6	2	20	89	23	3		2			2	0	14	0	0	11	0.0305407	44	5	-39	8.8
Fluoroacetyl-CoA thioesterase	31	37	68	5	154	131	256	7	37	17	21	7	23	141	119	179	144	124	0.130512	180.333	141.4	-38.9333	1.27534
Sensor histidine kinase ComP	7	9	22	1	35	32	83	1	7	1			4	27	7	0	0	22	0.017098	50	11.2	-38.8	4.46429
GalNAc-alpha-(1->4)-GalNAc-alpha-(1->3)-diNAcBac-PP-undecaprenol alpha-1%2C4-N-acetyl-D-galactosaminyltransferase	16	26	13	1	79	92	49	1	14	4	5		9	53	28	43	0	49	0.0251611	73.3333	34.6	-38.7333	2.11946
Glyceraldehyde-3-phosphate dehydrogenase 3	14	9	4	9	69	32	15	13											0	38.6667	0	-38.6667	0
Inner membrane protein YiaV	19	6	1	1	94	21	4	1					1	0	0	0	0	5	0.0520839	39.6667	1	-38.6667	39.6667
Thiol peroxidase	8	16	7	2	40	57	26	3		1			1	0	7	0	0	5	0.000666363	41	2.4	-38.6	17.0833
Glycine betaine transporter BetL	18	7	4	2	89	25	15	3	1	1			2	4	7	0	0	11	0.0327539	43	4.4	-38.6	9.77273
Virulence regulon transcriptional activator VirF	18	20	6	4	89	71	23	6	4	2	3	2	3	15	14	26	41	16	0.0257977	61	22.4	-38.6	2.72321
Stage IV sporulation protein FB	13	22	14	3	64	78	53	4	6	12	1		3	23	84	9	0	16	0.0547073	65	26.4	-38.6	2.46212
Arsenical-resistance protein Acr3	12	17	11	3	59	60	41	4	2		1	2	3	8	0	9	41	16	0.00500159	53.3333	14.8	-38.5333	3.6036
Carboxy-S-adenosyl-L-methionine synthase	13	11	5	5	64	39	19	7					2	0	0	0	0	11	0.00414956	40.6667	2.2	-38.4667	18.4848
Phosphoribosylglycinamide formyltransferase	69	115	111	19	342	407	418	27	106	47	35	17	69	404	328	299	350	372	0.121092	389	350.6	-38.4	1.10953
Porin-like protein L	21	3	0	0	104	11	0	0											0	38.3333	0	-38.3333	0
Sporulation kinase E	11	16	29	1	55	57	109	1	14	4	2	2	7	53	28	17	41	38	0.0229668	73.6667	35.4	-38.2667	2.08098
Phosphoribosyl 1%2C2-cyclic phosphate phosphodiesterase	26	14	59	11	129	50	222	16	32	16	12	4	11	122	112	102	82	59	0.183777	133.667	95.4	-38.2667	1.40112
putative siderophore transport system permease protein YfhA	13	10	16	4	64	35	60	6	3	1	4		4	11	7	34	0	22	0.00513346	53	14.8	-38.2	3.58108
Putative pyridoxal phosphate-dependent acyltransferase	11	18	33	4	55	64	124	6	25	7	5		5	95	49	43	0	27	0.0967571	81	42.8	-38.2	1.89252
Putative dipeptidase	21	30	25	5	104	106	94	7	9	18	4	2	15	34	126	34	41	81	0.0824349	101.333	63.2	-38.1333	1.60338
DNA-3-methyladenine glycosylase 1	28	27	27	3	139	96	102	4	10	8	6	6	19	38	56	51	123	103	0.0815308	112.333	74.2	-38.1333	1.51393
Trypsin	18	6	1	16	89	21	4	23											0	38	0	-38	0
Trans-aconitate 2-methyltransferase	15	21	26	9	74	74	98	13	13	6	2	3	9	50	42	17	62	49	0.00832034	82	44	-38	1.86364
HTH-type transcriptional regulator MalT	20	12	4	5	99	43	15	7	2	1		2	3	8	7	0	41	16	0.055999	52.3333	14.4	-37.9333	3.63426
Solvent efflux pump outer membrane protein SrpC	13	3	19	2	64	11	71	3	4	2	1		3	15	14	9	0	16	0.0194609	48.6667	10.8	-37.8667	4.50617
High-affinity zinc uptake system protein ZnuA	16	10	4	4	79	35	15	6	2	1			2	8	7	0	0	11	0.0183376	43	5.2	-37.8	8.26923
putative oxidoreductase YciK	12	10	8	4	59	35	30	6	3	1				11	7	0	0	0	0.000979728	41.3333	3.6	-37.7333	11.4815
Dihydrofolate reductase	52	89	89	17	258	315	335	24	73	49	23	9	60	278	342	196	185	324	0.222666	302.667	265	-37.6667	1.14214
Glucose-6-phosphate 1-dehydrogenase	9	17	2	7	45	60	8	10											0	37.6667	0	-37.6667	0
Sporulation-control protein spo0M	17	7	1	3	84	25	4	4											0	37.6667	0	-37.6667	0
Putative KHG/KDPG aldolase	49	36	24	16	243	128	90	23	17	15	10	10	22	65	105	85	206	119	0.225126	153.667	116	-37.6667	1.32471
Spermine/spermidine acetyltransferase	20	8	6	2	99	28	23	3	3	2		1	3	11	14	0	21	16	0.0443263	50	12.4	-37.6	4.03226
Modulator of FtsH protease HflC	24	24	16	9	119	85	60	13	8	8	4	3	13	30	56	34	62	70	0.030272	88	50.4	-37.6	1.74603
Translocation-enhancing protein TepA	20	26	24	2	99	92	90	3	17	6	5	4	9	65	42	43	82	49	0.00565237	93.6667	56.2	-37.4667	1.66667
Protein YrdA	52	37	88	14	258	131	331	20	58	25	33	9	28	221	174	282	185	151	0.251195	240	202.6	-37.4	1.1846
Serine transporter	18	6	5	9	89	21	19	13			2		2	0	0	17	0	11	0.0379619	43	5.6	-37.4	7.67857
Malate-2H(+)/Na(+)-lactate antiporter	117	84	108	31	580	298	406	44	95	52	46	23	67	362	363	393	473	362	0.296981	428	390.6	-37.4	1.09575
Fructose-1%2C6-bisphosphatase class 1	13	3	13	9	64	11	49	13	2	1			1	8	7	0	0	5	0.00953911	41.3333	4	-37.3333	10.3333
Sialic acid TRAP transporter small permease protein SiaQ	25	9	26	2	124	32	98	3	22	9	2	2	6	84	63	17	41	32	0.0966877	84.6667	47.4	-37.2667	1.78622
Putative glucose-6-phosphate 1-epimerase	13	5	9	4	64	18	34	6		1				0	7	0	0	0	0.00493416	38.6667	1.4	-37.2667	27.619
Type I secretion system membrane fusion protein PrsE	16	5	6	5	79	18	23	7		2				0	14	0	0	0	0.0226321	40	2.8	-37.2	14.2857
ATP-dependent zinc metalloprotease FtsH 3	10	25	46	10	50	89	173	14	24	14	5	1	15	91	98	43	21	81	0.152017	104	66.8	-37.2	1.55689
putative symporter YjmB	22	38	25	23	109	135	94	33	25	19	4	3	10	95	133	34	62	54	0.0927449	112.667	75.6	-37.0667	1.4903
Tungstate uptake system permease protein TupB	16	11	5	6	79	39	19	9	1	1		1	2	4	7	0	21	11	0.0178421	45.6667	8.6	-37.0667	5.31008
Cbb3-type cytochrome c oxidase subunit CcoN1	16	6	3	3	79	21	11	4											0	37	0	-37	0
Sulfite reductase [NADPH] flavoprotein alpha-component	15	6	5	8	74	21	19	11					1	0	0	0	0	5	0.0156047	38	1	-37	38
Glutathione reductase	15	6	5	5	74	21	19	7					1	0	0	0	0	5	0.0156047	38	1	-37	38
Atrazine chlorohydrolase	14	12	6	2	69	43	23	3		2		1	1	0	14	0	21	5	0.00810565	45	8	-37	5.625
Cold shock-like protein	13	7	17	5	64	25	64	7		1		2	4	0	7	0	41	22	0.0198606	51	14	-37	3.64286
Exopolyphosphatase	23	25	29	6	114	89	109	9	15	13	7	3	12	57	91	60	62	65	0.00483955	104	67	-37	1.55224
HTH-type transcriptional regulator DsdC	21	4	0	2	104	14	0	3		1			1	0	7	0	0	5	0.086465	39.3333	2.4	-36.9333	16.3889
Putative septation protein SpoVG	27	55	26	8	134	195	98	11	13	27	2	3	39	50	188	17	62	210	0.267188	142.333	105.4	-36.9333	1.35041
Aspartate--tRNA(Asp) ligase	17	11	21	1	84	39	79	1	14	6	1	1	5	53	42	9	21	27	0.0226971	67.3333	30.4	-36.9333	2.21491
CRISPR-associated endonuclease Cas9	17	45	40	7	84	159	150	10	33	21	9	3	11	126	147	77	62	59	0.128641	131	94.2	-36.8	1.39066
tRNA U34 carboxymethyltransferase	12	12	5	4	59	43	19	6		1			2	0	7	0	0	11	0.00328353	40.3333	3.6	-36.7333	11.2037
Tungstate-binding protein TupA	15	11	6	6	74	39	23	9	1	1		1	2	4	7	0	21	11	0.011068	45.3333	8.6	-36.7333	5.27132
Sensor histidine kinase YycG	0	31	0	0	0	110	0	0											0	36.6667	0	-36.6667	0
Aspartate carbamoyltransferase catalytic chain	0	31	0	0	0	110	0	0											0	36.6667	0	-36.6667	0
Flagellum-specific ATP synthase	13	7	9	6	64	25	34	9			2		1	0	0	17	0	5	0.00455642	41	4.4	-36.6	9.31818
Molybdopterin molybdenumtransferase	38	36	18	12	188	128	68	17	20	10	4	8	21	76	70	34	164	113	0.190913	128	91.4	-36.6	1.40044
Alanine racemase	23	31	27	4	114	110	102	6	26	15	7	1	14	99	105	60	21	76	0.0615688	108.667	72.2	-36.4667	1.50508
Tropinesterase	2	17	27	3	10	60	102	4	2	8	1	1	2	8	56	9	21	11	0.0815625	57.3333	21	-36.3333	2.73016
Sporulation-specific protease YabG	6	19	9	4	30	67	34	6		3			3	0	21	0	0	16	0.00687097	43.6667	7.4	-36.2667	5.9009
Type II secretion system protein E	62	57	27	23	307	202	102	33	38	27	20	6	39	145	188	171	123	210	0.238533	203.667	167.4	-36.2667	1.21665
Phage-like element PBSX protein XkdM	6	8	15	3	30	28	56	4			1			0	0	9	0	0	0.00104311	38	1.8	-36.2	21.1111
Gamma-glutamylputrescine oxidoreductase	13	16	7	3	64	57	26	4	1	1	3		5	4	7	26	0	27	0.00968223	49	12.8	-36.2	3.82812
Tyrosine-specific transport protein	18	7	1	0	89	25	4	0	3				1	11	0	0	0	5	0.0521681	39.3333	3.2	-36.1333	12.2917
Chitodextrinase	17	7	5	4	84	25	19	6		1		1	1	0	7	0	21	5	0.0324965	42.6667	6.6	-36.0667	6.46465
Regulatory protein LuxO	19	10	2	7	94	35	8	10	4	1		1	1	15	7	0	21	5	0.0547047	45.6667	9.6	-36.0667	4.75694
Iron-sulfur cluster assembly protein CyaY	15	5	5	4	74	18	19	6					1	0	0	0	0	5	0.0189789	37	1	-36	37
Guanosine-5'-triphosphate%2C3'-diphosphate pyrophosphatase	22	23	13	8	109	81	49	11	8	6	3	3	11	30	42	26	62	59	0.0330173	79.6667	43.8	-35.8667	1.81887
Spermidine/putrescine transport system permease protein PotB	46	58	50	10	228	205	188	14	44	29	23	7	27	168	202	196	144	146	0.0488751	207	171.2	-35.8	1.20911
DNA gyrase subunit A	139	267	224	38	689	946	843	54	224	120	79	39	145	853	838	675	802	783	0.310563	826	790.2	-35.8	1.0453
Multidrug export protein AcrF	11	8	11	2	55	28	41	3	2		1		2	8	0	9	0	11	0.00075334	41.3333	5.6	-35.7333	7.38095
Type II secretion system protein L	13	8	4	7	64	28	15	10											0	35.6667	0	-35.6667	0
Acid stress protein IbaG	12	8	6	9	59	28	23	13					1	0	0	0	0	5	0.00259825	36.6667	1	-35.6667	36.6667
Inner membrane protein YebS	15	7	3	4	74	25	11	6					1	0	0	0	0	5	0.0218775	36.6667	1	-35.6667	36.6667
UvrABC system protein C	92	147	155	26	456	521	583	37	129	80	46	23	94	491	558	393	473	507	0.228271	520	484.4	-35.6	1.07349
Integration host factor subunit beta	16	11	10	4	79	39	38	6	5	1	4		4	19	7	34	0	22	0.0152762	52	16.4	-35.6	3.17073
Branched-chain amino acid transport system 2 carrier protein	27	14	3	6	134	50	11	9	3	1	6	3	3	11	7	51	62	16	0.143557	65	29.4	-35.6	2.21088
DNA protection during starvation protein 2	9	11	8	4	45	39	30	6	2				1	8	0	0	0	5	4.86023e-05	38	2.6	-35.4	14.6154
Major NAD(P)H-flavin oxidoreductase	10	17	5	5	50	60	19	7			2	1		0	0	17	21	0	0.00900768	43	7.6	-35.4	5.65789
L-serine dehydratase%2C beta chain	18	10	22	5	89	35	83	7	4	3	5	3	5	15	21	43	62	27	0.0402089	69	33.6	-35.4	2.05357
Choline trimethylamine-lyase	41	21	40	5	203	74	150	7	17	28	10	4	20	65	195	85	82	108	0.211619	142.333	107	-35.3333	1.33022
Type II secretion system protein M	12	9	4	7	59	32	15	10											0	35.3333	0	-35.3333	0
DNA-binding protein	17	3	3	5	84	11	11	7											0	35.3333	0	-35.3333	0
Ribonuclease T	12	7	9	4	59	25	34	6			1		2	0	0	9	0	11	0.00241458	39.3333	4	-35.3333	9.83333
Long-chain fatty acid transport protein	18	4	4	3	89	14	15	4			1		2	0	0	9	0	11	0.0518624	39.3333	4	-35.3333	9.83333
Accessory gene regulator protein B	7	19	13	1	35	67	49	1	1	1		1	8	4	7	0	21	43	0.014836	50.3333	15	-35.3333	3.35556
Sulfur carrier protein adenylyltransferase	9	2	21	9	45	7	79	13	6	2			1	23	14	0	0	5	0.0369075	43.6667	8.4	-35.2667	5.19841
tRNA-Ala(tgc)	17	52	22	23	84	184	83	33	17	21	8	1	20	65	147	68	21	108	0.192211	117	81.8	-35.2	1.43032
Putative transport protein YdiK	19	4	9	0	94	14	34	0	1	1	1	2		4	7	9	41	0	0.0656088	47.3333	12.2	-35.1333	3.87978
Inner membrane protein YccS	16	7	2	3	79	25	8	4					2	0	0	0	0	11	0.0346137	37.3333	2.2	-35.1333	16.9697
Nicotinate-nucleotide adenylyltransferase	51	69	90	19	253	244	339	27	66	33	27	12	48	251	230	231	247	259	0.0921329	278.667	243.6	-35.0667	1.14395
Inner membrane ABC transporter permease protein YejE	14	16	6	1	69	57	23	1		3	1	1	4	0	21	9	21	22	0.0117446	49.6667	14.6	-35.0667	3.40183
UV DNA damage endonuclease	4	24	0	1	20	85	0	1											0	35	0	-35	0
Catalase-peroxidase	13	7	5	4	64	25	19	6					1	0	0	0	0	5	0.00752808	36	1	-35	36
V-type proton ATPase subunit E	52	82	102	19	258	290	384	27	84	40	19	18	46	320	279	162	370	248	0.272178	310.667	275.8	-34.8667	1.12642
Antibiotic efflux pump membrane transporter ArpB	10	5	13	3	50	18	49	4		3				0	21	0	0	0	0.00526407	39	4.2	-34.8	9.28571
Stress response kinase A	15	20	7	5	74	71	26	7	2	6	4		5	8	42	34	0	27	0.0327883	57	22.2	-34.8	2.56757
Oxygen-independent coproporphyrinogen III oxidase	21	11	9	8	104	39	34	11	5	1	2	3	3	19	7	17	62	16	0.0735908	59	24.2	-34.8	2.43802
Putative defective protein IntQ	25	6	23	3	124	21	87	4	10	11	4	1	8	38	77	34	21	43	0.109292	77.3333	42.6	-34.7333	1.81534
Aminodeoxyfutalosine deaminase	20	16	25	5	99	57	94	7	15	5	6	2	11	57	35	51	41	59	0.0115729	83.3333	48.6	-34.7333	1.71468
FAD:protein FMN transferase	82	91	138	23	406	322	519	33	108	62	37	16	77	411	433	316	329	416	0.267717	415.667	381	-34.6667	1.09099
2-octaprenyl-6-methoxyphenol hydroxylase	13	8	4	5	64	28	15	7					1	0	0	0	0	5	0.00913498	35.6667	1	-34.6667	35.6667
2-octaprenylphenol hydroxylase	13	8	4	4	64	28	15	6					1	0	0	0	0	5	0.00913498	35.6667	1	-34.6667	35.6667
Extracellular deoxyribonuclease	15	13	7	10	74	46	26	14		2	6		1	0	14	51	0	5	0.0390746	48.6667	14	-34.6667	3.47619
Holo-[acyl-carrier-protein] synthase	38	39	35	10	188	138	132	14	30	11	20	4	27	114	77	171	82	146	0.126739	152.667	118	-34.6667	1.29379
Inner membrane transport protein YdhC	18	2	4	1	89	7	15	1		1			1	0	7	0	0	5	0.0605443	37	2.4	-34.6	15.4167
Phosphate-import ATP-binding protein PhnC	8	11	15	2	40	39	56	3	2	1		1	3	8	7	0	21	16	0.000783741	45	10.4	-34.6	4.32692
Aminodeoxychorismate lyase	12	9	4	4	59	32	15	6	1					4	0	0	0	0	0.00524294	35.3333	0.8	-34.5333	44.1667
Deoxyribose-phosphate aldolase	76	88	109	23	377	312	410	33	87	51	32	18	61	331	356	273	370	329	0.150563	366.333	331.8	-34.5333	1.10408
2-hydroxy-6-oxononadienedioate/2-hydroxy-6-oxononatrienedioate hydrolase	12	15	9	6	59	53	34	9	3	1	3		5	11	7	26	0	27	0.00429141	48.6667	14.2	-34.4667	3.42723
Type II secretion system protein J	13	10	4	7	64	35	15	10	1	2				4	14	0	0	0	0.0101969	38	3.6	-34.4	10.5556
Actin-binding protein	4	5	21	5	20	18	79	7	1	2			1	4	14	0	0	5	0.0308681	39	4.6	-34.4	8.47826
Disulfide bond formation protein B	17	8	3	3	84	28	11	4			2		3	0	0	17	0	16	0.0446143	41	6.6	-34.4	6.21212
Fructose-bisphosphate aldolase class 2	15	21	6	3	74	74	23	4	7	2	4		7	27	14	34	0	38	0.0341753	57	22.6	-34.4	2.52212
Cellobiose 2-epimerase	41	63	37	4	203	223	139	6	36	20	25	7	25	137	140	214	144	135	0.127782	188.333	154	-34.3333	1.22294
Thioredoxin-1	0	29	0	3	0	103	0	4											0	34.3333	0	-34.3333	0
Type II secretion system protein N	12	7	5	6	59	25	19	9											0	34.3333	0	-34.3333	0
Putative type II secretion system protein K	13	8	3	5	64	28	11	7											0	34.3333	0	-34.3333	0
putative acrylyl-CoA reductase AcuI	12	8	5	7	59	28	19	10					1	0	0	0	0	5	0.00429362	35.3333	1	-34.3333	35.3333
HTH-type transcriptional regulator YhaJ	17	4	2	2	84	14	8	3					1	0	0	0	0	5	0.0515055	35.3333	1	-34.3333	35.3333
8-amino-3%2C8-dideoxy-manno-octulosonate cytidylyltransferase	18	12	53	7	89	43	199	10	34	7	10	3	10	130	49	85	62	54	0.207203	110.333	76	-34.3333	1.45175
Esterase YbfF	16	8	4	6	79	28	15	9	7				1	27	0	0	0	5	0.0371661	40.6667	6.4	-34.2667	6.35417
RNA-binding protein YhbY	37	28	26	10	183	99	98	14	15	19	5	3	31	57	133	43	62	167	0.203302	126.667	92.4	-34.2667	1.37085
Outer membrane efflux protein BepC	43	40	52	10	213	142	196	14	37	25	21	6	24	141	174	179	123	130	0.0839811	183.667	149.4	-34.2667	1.22936
(R)-citramalate synthase	5	29	7	3	25	103	26	4	5	2		1	6	19	14	0	21	32	0.070239	51.3333	17.2	-34.1333	2.9845
Acryloyl-CoA reductase electron transfer subunit gamma	7	28	11	3	35	99	41	4	14	3	1		7	53	21	9	0	38	0.0665538	58.3333	24.2	-34.1333	2.41047
Chloramphenicol acetyltransferase	15	22	15	3	74	78	56	4	6	3	5	3	5	23	21	43	62	27	0.012246	69.3333	35.2	-34.1333	1.9697
Cytochrome bd-I ubiquinol oxidase subunit 1	24	16	18	6	119	57	68	9	12	7	8	2	6	46	49	68	41	32	0.0387314	81.3333	47.2	-34.1333	1.72316
tRNA-Ile(gat)	16	53	19	13	79	188	71	19	16	24	3	3	14	61	168	26	62	76	0.224413	112.667	78.6	-34.0667	1.43342
putative sensor-like histidine kinase	29	16	18	4	144	57	68	6	8	7	6	3	16	30	49	51	62	86	0.0980595	89.6667	55.6	-34.0667	1.61271
Putative cysteine protease YraA	4	27	8	2	20	96	30	3	2	3	2		5	8	21	17	0	27	0.0579087	48.6667	14.6	-34.0667	3.33333
Flap endonuclease Xni	11	11	3	6	55	39	11	9					1	0	0	0	0	5	0.00578802	35	1	-34	35
Peptide methionine sulfoxide reductase MsrB	14	8	2	5	69	28	8	7					1	0	0	0	0	5	0.0208892	35	1	-34	35
tRNA-Ile(tat)	7	22	5	10	35	78	19	14	1	2		1	2	4	14	0	21	11	0.0243116	44	10	-34	4.4
[truncated: 6,022 more rows]
